# Supplementary material for: Proteome-wide systems genetics identifies UFMylation as a regulator of skeletal muscle function
Source: eLife journal article supplement (doi:10.7554/elife.82951), 2022-12-06
Supplement: fig5-data1 [file elife-82951-fig5-data1-v2.zip]

Figure 5A - Source Data

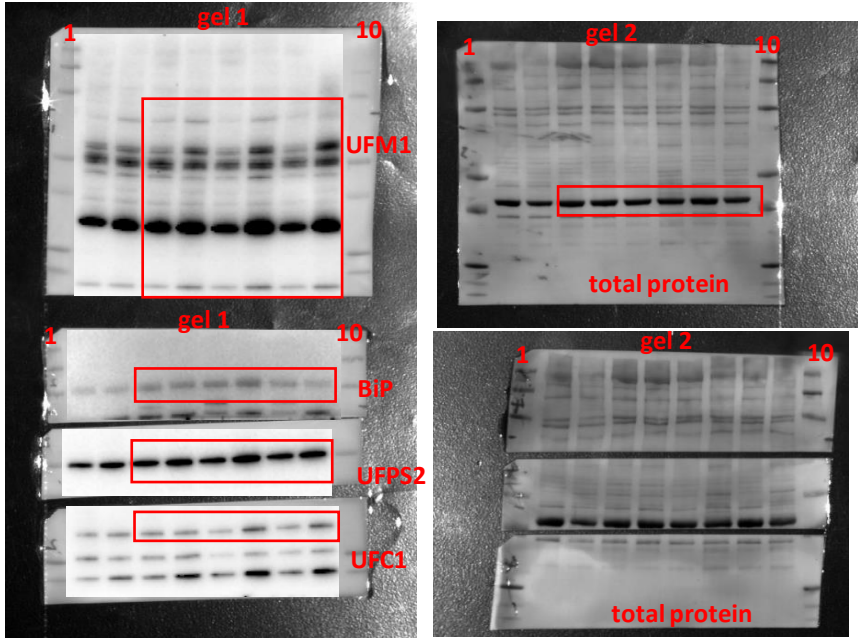

| lane | Mouse ID # | Genotype |
|------|------------|----------|
| 1    | MW marker  |          |
| 2    | 564        | Non-Tg   |
| 3    | 566        | SOD1G37R |
| 4    | 565        | Non-Tg   |
| 5    | 567        | SOD1G37R |
| 6    | 570        | Non-Tg   |
| 7    | 568        | SOD1G37R |
| 8    | 571        | Non-Tg   |
| 9    | 569        | SOD1G37R |
| 10   | MW marker  |          |

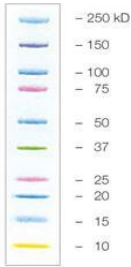

Gel 1  
Whole gel  
anti-UFM1 (Ab109305; Rb; 1:1000)

Gel 2  
cut under 75, at 37  
anti-BiP (CST3177; 1:1000; RB; 80kDa)  
anti-UFSP2 (ab192597; Rabbit; 1:1,000; 53KDa)  
anti-UFC1 (Ab189251; Rabbit; 1:10,000; 20kDa)

| Mous ID# |          | UFC1      | UFSP2     | Conjugated-UFM1 | free-UFM1 | BiP      | Total     | UFC1/Total  | UFSP2/Total | Conjugated-UFM1 | free-UFM1/total | BiP/total   |
|----------|----------|-----------|-----------|-----------------|-----------|----------|-----------|-------------|-------------|-----------------|-----------------|-------------|
| 564      | Non-Tg   | 3348.104  | 8261.196  | 8631.125        | 4901.205  | 3430.945 | 17829.054 | 0.187789212 | 0.463355824 | 0.484104485     | 0.274899891     | 0.192435617 |
| 566      | SOD1G37R | 7422.397  | 10682.347 | 11695.64        | 6730.782  | 2951.167 | 13188.518 | 0.562792347 | 0.809973266 | 0.886804719     | 0.510351656     | 0.223767902 |
| 565      | Non-Tg   | 5636.64   | 11019.418 | 10673.054       | 5870.933  | 5079.803 | 19563.518 | 0.288119959 | 0.563263622 | 0.545559035     | 0.300095975     | 0.259656929 |
| 567      | SOD1G37R | 13696.933 | 12472.761 | 13329.004       | 13057.631 | 4828.711 | 13550.225 | 1.010826979 | 0.920483682 | 0.983673998     | 0.963646803     | 0.356356518 |
| 570      | Non-Tg   | 5516.912  | 8534.296  | 7083.69         | 4846.104  | 4438.497 | 15513.761 | 0.35561409  | 0.55011135  | 0.45660688      | 0.312374543     | 0.286100643 |
| 568      | SOD1G37R | 18340.317 | 14628.64  | 16667.054       | 15188.761 | 7052.418 | 14994.225 | 1.223158716 | 0.97561828  | 1.111564886     | 1.012974062     | 0.470342282 |
| 571      | Non-Tg   | 5222.447  | 8056.397  | 6276.175        | 4814.761  | 3936.368 | 19681.225 | 0.265351725 | 0.409344286 | 0.318891482     | 0.244637262     | 0.20000625  |
| 569      | SOD1G37R | 15308.296 | 14240.037 | 16317.711       | 12875.66  | 3664.418 | 16350.104 | 0.936281262 | 0.870944735 | 0.998018789     | 0.787497132     | 0.224121999 |
