# Supplementary material for: Proteome-wide systems genetics identifies UFMylation as a regulator of skeletal muscle function
Source: eLife journal article supplement (doi:10.7554/elife.82951), 2022-12-06
Supplement: fig5-data2 [file elife-82951-fig5-data2-v2.zip]

Figure 5D - Source Data

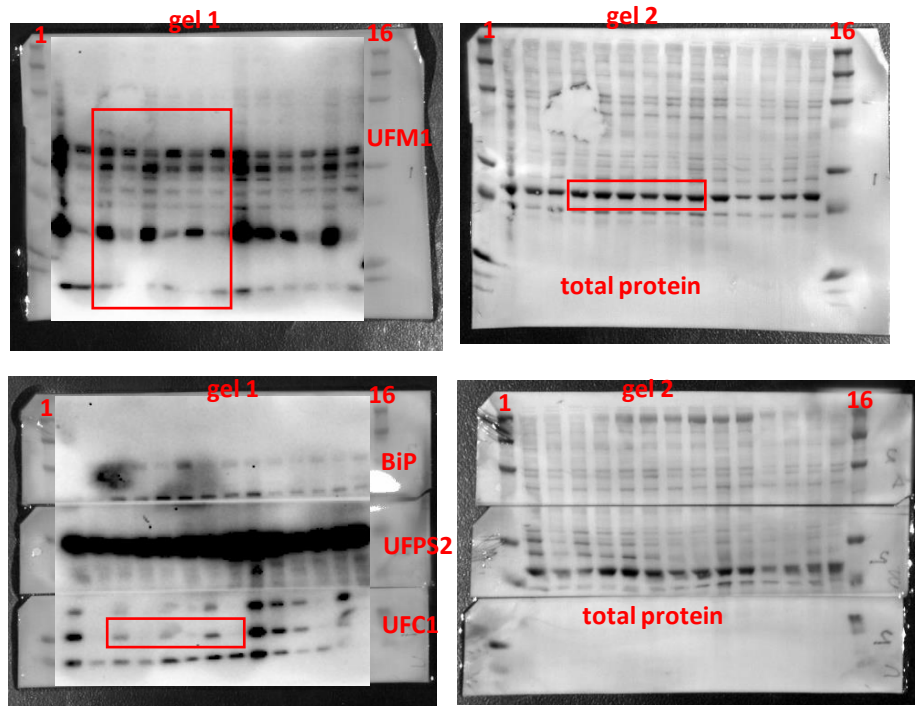

**Gel 1**  
Whole gel  
anti-UFM1 (Ab109305; Rb; 1:1000)

**Gel 2**  
cut under 75, at 37  
anti-BiP (CST3177; 1:1000; RB; 80kDa)  
anti-UFSP2 (ab192597; Rabbit; 1:1,000; 53kDa)  
anti-UFC1 (Ab189251; Rabbit; 1:10,000; 20kDa)

| Lane | Mouse ID#_leg |           |
|------|---------------|-----------|
| 1    | MW marker     |           |
| 2    | 435-L         | shSramble |
| 3    | 435-R         | shUFC1    |
| 4    | 436-L         | shSramble |
| 5    | 436-R         | shUFC1    |
| 6    | 437-L         | shSramble |
| 7    | 437-R         | shUFC1    |
| 8    | 438-L         | shSramble |
| 9    | 438-R         | shUFC1    |
| 10   | 441-L         | shSramble |
| 11   | 441-R         | shUFC1    |
| 12   | 443-L         | shSramble |
| 13   | 443-R         | shUFC1    |
| 14   | 444-L         | shSramble |
| 15   | 444-R         | shUFC1    |
| 16   | MW marker     |           |
| 17   |               |           |

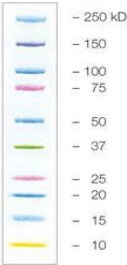

| Mouse ID#_leg | UFC1    | total    | UFC1/tot prot | UFM1     | total    | UFM1/total  |           |
|---------------|---------|----------|---------------|----------|----------|-------------|-----------|
| 435-L         | 2112772 | 4754.888 | 444.3368592   | 5351.296 | 4548.153 | 1.176586628 | shSramble |
| 435-R         | 355760  | 3852.573 | 92.34348058   | 2671.098 | 3853.518 | 0.693158304 | shUFC1    |
| 436-L         | 735551  | 4176.024 | 176.1366793   | 4202.872 | 3916.935 | 1.07300019  | shSramble |
| 436-R         | 361069  | 4674.844 | 77.236588     | 2975.556 | 3949.21  | 0.753456008 | shUFC1    |
| 437-L         | 789076  | 5205.634 | 151.5811523   | 4252.923 | 4368.668 | 0.973505654 | shSramble |
| 437-R         | 368889  | 5190.196 | 71.0741945    | 3261.728 | 4289.694 | 0.760363793 | shUFC1    |
| 438-L         | 900521  | 4891.998 | 184.0804105   | 3524.994 | 4024.197 | 0.875949662 | shSramble |
| 438-R         | 459123  | 5186.536 | 88.52208873   | 3238.465 | 4309.647 | 0.751445536 | shUFC1    |
| 441-L         | 2747228 | 5750.645 | 477.7251943   | 6046.954 | 4739.181 | 1.275949157 | shSramble |
| 441-R         | 1262288 | 5566.511 | 226.7646646   | 4411.411 | 4469.714 | 0.986955989 | shUFC1    |
| 443-L         | 547030  | 5030.943 | 108.7330944   | 3602.693 | 3763.938 | 0.957160559 | shSramble |
| 443-R         | 170020  | 5256.222 | 32.34642677   | 2973.553 | 3986.156 | 0.745970052 | shUFC1    |
| 444-L         | 1179411 | 5777.1   | 204.1527756   | 4660.083 | 4368.945 | 1.066638056 | shSramble |
| 444-R         | 90235   | 5942.207 | 15.18543531   | 3474.886 | 4697.953 | 0.739659592 | shUFC1    |
