# Supplementary material for: Proteome-wide systems genetics identifies UFMylation as a regulator of skeletal muscle function
Source: eLife journal article supplement (doi:10.7554/elife.82951), 2022-12-06
Supplement: fig6-data1 [file elife-82951-fig6-data1-v2.zip]

Figure 6H - Source Data

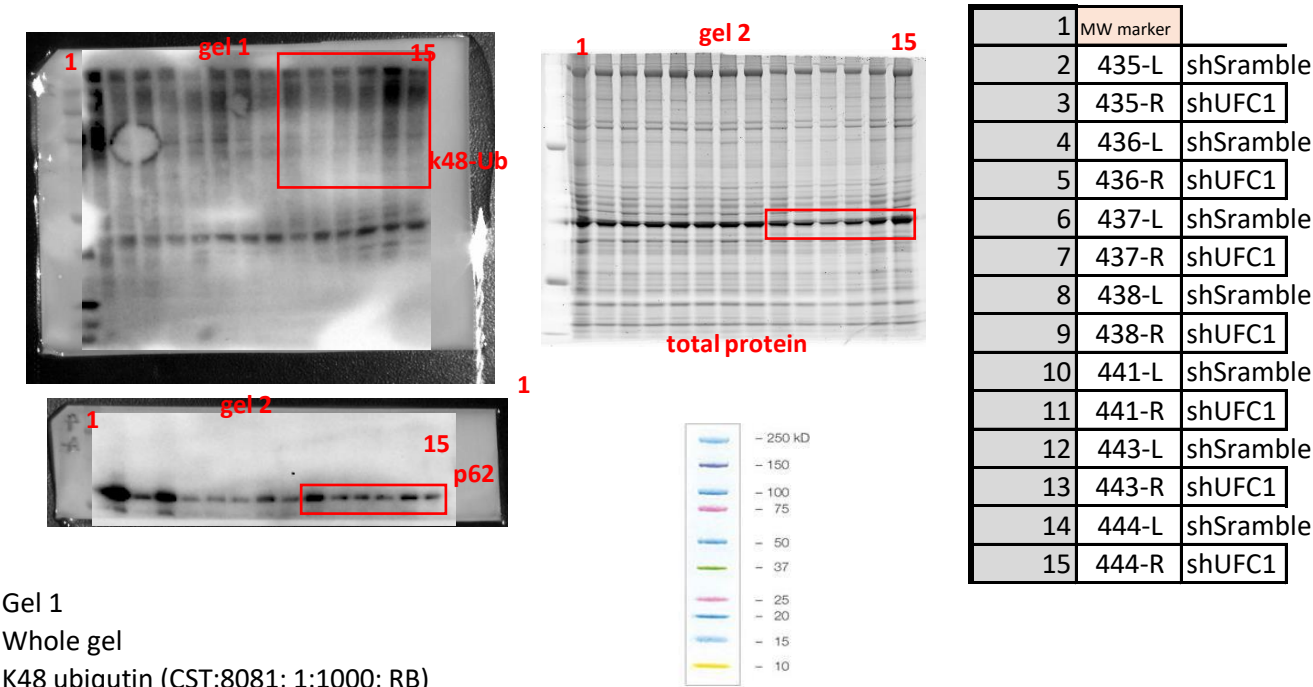

|    |           |           |
|----|-----------|-----------|
| 1  | MW marker |           |
| 2  | 435-L     | shSramble |
| 3  | 435-R     | shUFC1    |
| 4  | 436-L     | shSramble |
| 5  | 436-R     | shUFC1    |
| 6  | 437-L     | shSramble |
| 7  | 437-R     | shUFC1    |
| 8  | 438-L     | shSramble |
| 9  | 438-R     | shUFC1    |
| 10 | 441-L     | shSramble |
| 11 | 441-R     | shUFC1    |
| 12 | 443-L     | shSramble |
| 13 | 443-R     | shUFC1    |
| 14 | 444-L     | shSramble |
| 15 | 444-R     | shUFC1    |

|    |           |           |          |         |             |         |             |
|----|-----------|-----------|----------|---------|-------------|---------|-------------|
| 1  | MW marker |           | total    | p62     | p62/total   | K48     | K48/total   |
| 2  | 435-L     | shSramble | 4101.392 | 6521718 | 1.590123061 | 4163114 | 1.015049037 |
| 3  | 435-R     | shUFC1    | 2826.636 | 2362460 | 0.835785011 | 2664168 | 0.94252249  |
| 4  | 436-L     | shSramble | 3067.099 | 4012953 | 1.308387176 | 3204595 | 1.044829332 |
| 5  | 436-R     | shUFC1    | 2752.215 | 1055322 | 0.383444607 | 1655372 | 0.601468999 |
| 6  | 437-L     | shSramble | 3022.341 | 963920  | 0.318931583 | 1252060 | 0.414268277 |
| 7  | 437-R     | shUFC1    | 2960.981 | 800377  | 0.27030805  | 2678556 | 0.90461776  |
| 8  | 438-L     | shSramble | 3001.246 | 1376130 | 0.458519562 | 1952216 | 0.650468505 |
| 9  | 438-R     | shUFC1    | 2705.43  | 1188276 | 0.439218904 | 917618  | 0.339176397 |
| 10 | 441-L     | shSramble | 2667.067 | 2033413 | 0.762415417 | 2340094 | 0.87740353  |
| 11 | 441-R     | shUFC1    | 1965.605 | 952910  | 0.484792214 | 1400443 | 0.712474276 |
| 12 | 443-L     | shSramble | 1826.305 | 1012013 | 0.554131429 | 1920451 | 1.051549988 |
| 13 | 443-R     | shUFC1    | 2154.666 | 1071772 | 0.49741909  | 1645377 | 0.763634364 |
| 14 | 444-L     | shSramble | 3040.557 | 1266717 | 0.416606891 | 3765214 | 1.238330345 |
| 15 | 444-R     | shUFC1    | 3512.913 | 1078769 | 0.30708674  | 1513082 | 0.430720032 |
