# Supplementary material for: Proteome-wide systems genetics identifies UFMylation as a regulator of skeletal muscle function
Source: eLife. 2022 Dec 6;11:e82951. doi: 10.7554/eLife.82951 (PMC9833826; doi:10.7554/eLife.82951)
Supplement: Supplementary file 1. — Proteomics data of gastrocnemius muscle displaying quantification ratios of each sample compared to its corresponding pooled tandem mass tag (TMT) control. PEP: posterior error probability. Related to Figures 1—3, Figure 1—figure supplement 1. [file elife-82951-supp1.xlsx]

## Sheet: Sheet1
Leading Accession	Gene Name	Description	Unique Sequence ID	Exp. q-value: Combined	Sum PEP Score	Coverage [%]	# Peptides	# PSMs	# Protein Unique Peptides	# Unique Peptides	# Protein Groups	Score Sequest HT: Sequest HT	# PSMs (by Search Engine): Sequest HT	# Peptides (by Search Engine): Sequest HT	# Razor Peptides	FASTA Title Lines	A/J_7	A/J_8	AXB10/PgnJ_51	AXB10/PgnJ_52	AXB13/PgnJ_55	AXB13/PgnJ_56	AXB15/PgnJ_53	AXB15/PgnJ_54	AXB15/PgnJ_87	AXB15/PgnJ_88	AXB19a/PgnJ_59	AXB19a/PgnJ_60	AXB4/PgnJ_47	AXB4/PgnJ_67	AXB4/PgnJ_68	AXB8/PgnJ_57	AXB8/PgnJ_58	BALB/cByJ_5	BALB/cByJ_6	BTBR T+ tf/J_79	BTBR T+ tf/J_80	BUB/BnJ_111	BUB/BnJ_112	BXA12/PgnJ_61	BXA12/PgnJ_62	BXA13/PgnJ_23	BXA13/PgnJ_24	BXA14/PgnJ_36	BXA16/PgnJ_43	BXA16/PgnJ_44	BXA16/PgnJ_71	BXA16/PgnJ_72	BXA2/PgnJ_123
E9Q1W3	Neb	Nebulin OS=Mus musculus OX=10090 GN=Neb PE=1 SV=1	-8.75e+18	0	4779.07	75	466	25987	1	193	1	81376.9	25987	466	331	>tr|E9Q1W3|E9Q1W3_MOUSE Nebulin OS=Mus musculus OX=10090 GN=Neb PE=1 SV=1	0.19	0.2	0.13	0.07	0.04	0.1	0.03	0.08	-0.02	0.11	0.18	0.02	0.01	-0.04	-0.04	0.05	0.04	0.2	0.15	-0.22	0.01	-0.01	-0.07	0.06	0.05	0.04	-0.41	0.07	-0.07	-0.15	0.04	0	-0.01
Q5SX39	Myh4	Myosin-4 OS=Mus musculus OX=10090 GN=Myh4 PE=2 SV=1	-1.99e+18	0	3480.23	76	254	110703	67	67	1	343166	110703	254	237	>sp|Q5SX39|MYH4_MOUSE Myosin-4 OS=Mus musculus OX=10090 GN=Myh4 PE=2 SV=1	0.16	0.18	0.12	0.04	0.02	0.14	0.01	0.06	-0.09	0.05	0.13	-0.03	-0.02	-0.1	-0.1	0.06	0	0.17	0.11	-0.17	0.04	0	-0.06	0.01	-0.01	0.03	-0.49	0.05	-0.07	-0.18	0	-0.03	-0.04
Q5SX40	Myh1	Myosin-1 OS=Mus musculus OX=10090 GN=Myh1 PE=1 SV=1	-3.01e+18	0	2956	74	221	78390	23	27	1	247412	78390	221	45	>sp|Q5SX40|MYH1_MOUSE Myosin-1 OS=Mus musculus OX=10090 GN=Myh1 PE=1 SV=1	-0.63	-0.39	-0.06	0.13	0.25	-0.49	-0.24	-0.08	0.01	-0.35	0.03	-0.34	-0.18	-0.06	0.36	-0.06	-0.21	-0.93	-0.23	0.02	0.15	0.06	0.27	-0.5	0.03	0.18	-0.03	0.31	-0.09	-0.08	-0.42	-0.19	-0.06
G3UW82	Myh2	MCG140437, isoform CRA_d OS=Mus musculus OX=10090 GN=Myh2 PE=1 SV=1	1.92e+17	0	2684.74	71	204	71376	27	27	1	227660	71376	204	9	>tr|G3UW82|G3UW82_MOUSE MCG140437, isoform CRA_d OS=Mus musculus OX=10090 GN=Myh2 PE=1 SV=1	-1.01	-0.59	0.02	0.19	0.26	-0.46	-0.18	0.24	0.28	-0.33	0.06	-0.38	-0.24	-0.05	0.2	0.01	-0.19	-1.04	-0.29	-0.04	0.21	0.05	0.05	-0.86	0.16	0.17	-0.28	0.34	0.13	0.15	-0.23	0.06	0.05
A2ASS6-3	Ttn	Isoform of A2ASS6, Isoform 3 of Titin OS=Mus musculus OX=10090 GN=Ttn	-9.13e+17	0	2574.51	62	263	13088	78	79	1	47432.6	13088	263	0	>sp|A2ASS6-3|TITIN_MOUSE Isoform of A2ASS6, Isoform 3 of Titin OS=Mus musculus OX=10090 GN=Ttn	-0.03	0.07	-0.12	-0.11	-0.05	-0.11	-0.18	0.04	-0.33	-0.25	-0.01	-0.26	-0.1	-0.18	-0.08	-0.19	-0.09	-0.05	0	-0.27	0.06	-0.17	-0.17	-0.03	-0.05	0.01	0.1	0.09	-0.14	-0.1	-0.12	-0.2	-0.09
E9PZQ0	Ryr1	Ryanodine receptor 1 OS=Mus musculus OX=10090 GN=Ryr1 PE=1 SV=1	3.76e+18	0	2477.56	58	225	7176	0	212	1	25511.2	7176	225	16	>sp|E9PZQ0|RYR1_MOUSE Ryanodine receptor 1 OS=Mus musculus OX=10090 GN=Ryr1 PE=1 SV=1	0.19	0.2	0.03	-0.05	0.01	-0.08	-0.04	0.01	-0.1	0.02	0.18	-0.03	-0.07	-0.11	-0.22	-0.1	0.06	0.26	0.14	-0.25	0.04	0.04	0.03	-0.1	0.06	-0.08	0.02	-0.04	0	-0.18	0.12	0	0.04
Q9QXS1	Plec	Plectin OS=Mus musculus OX=10090 GN=Plec PE=1 SV=3	8.21e+18	0	2169.55	65	282	8244	0	278	1	29773.6	8244	282	4	>sp|Q9QXS1|PLEC_MOUSE Plectin OS=Mus musculus OX=10090 GN=Plec PE=1 SV=3	0.03	0.02	-0.04	-0.07	0	-0.15	0	-0.02	0.01	0.01	-0.02	-0.16	-0.19	-0.16	-0.08	-0.1	-0.05	-0.06	-0.01	0	0.18	0.03	0.06	-0.12	0.09	0.06	0.42	0.09	0.06	-0.04	0.05	0.01	0.09
P13542	Myh8	Myosin-8 OS=Mus musculus OX=10090 GN=Myh8 PE=2 SV=2	8.5e+18	0	2156.47	61	173	57489	12	12	1	189237	57489	173	3	>sp|P13542|MYH8_MOUSE Myosin-8 OS=Mus musculus OX=10090 GN=Myh8 PE=2 SV=2	0.3	0.31	-1.17	-0.02	0.1	0.43	0.19	-0.46	-0.38	0.7	-0.4	0.1	-0.31	-0.8	0.1	-0.47	-0.31	1.83	-0.16	-0.5	0.34	-0.07	0.2	-0.21	0.12	-0.52	-0.7	-0.32	-0.14	-0.22	-0.21	-0.46	0.07
A2AAJ9	Obscn	Obscurin OS=Mus musculus OX=10090 GN=Obscn PE=1 SV=2	6.15e+18	0	2060.59	52	269	5273	2	2	1	18835.3	5273	269	290	>sp|A2AAJ9|OBSCN_MOUSE Obscurin OS=Mus musculus OX=10090 GN=Obscn PE=1 SV=2	0.09	0.07	0.13	0.11	0.12	-0.02	-0.01	0.08	-0.18	-0.1	0.12	-0.04	0.04	0.02	0.08	-0.07	0	0	-0.04	-0.1	0.11	-0.04	-0.03	0.09	0.22	0.09	0.24	0.06	-0.06	-0.11	-0.01	-0.03	0.2
A2AQB2	Neb	Isoform of E9Q1W3, Nebulin OS=Mus musculus OX=10090 GN=Neb PE=1 SV=1	7.29e+18	0	2013.59	71	213	10347	16	17	1	34252.4	10347	213	0	>tr|A2AQB2|A2AQB2_MOUSE Isoform of E9Q1W3, Nebulin OS=Mus musculus OX=10090 GN=Neb PE=1 SV=1	0.14	0.12	0.29	0.19	-0.01	0.06	0.03	0.26	-0.04	0.11	0.46	0.23	0	0.11	-0.02	0.07	0.06	0.39	0.41	0.03	0.2	0.01	0.05	0.25	0.23	0.07	-0.25	0.08	0.03	-0.17	0.1	0	0.29
H7BX05	Obscn	Isoform of A2AAJ9, Obscurin OS=Mus musculus OX=10090 GN=Obscn PE=1 SV=2	-6.69e+18	0	1994.12	52	260	5183	1	1	1	18659	5183	260	6	>tr|H7BX05|H7BX05_MOUSE Isoform of A2AAJ9, Obscurin OS=Mus musculus OX=10090 GN=Obscn PE=1 SV=2	0.24	0.04	0.15	0.06	0.01	-0.16	0.05	0.21	-0.03	-0.04	0.08	-0.09	0	-0.08	-0.01	0.03	0.02	0.24	-0.03	-0.12	0.17	-0.01	-0.01	-0.02	0.28	0	0.05	0.21	-0.02	0.1	0.02	0.02	0.06
Q91Z83	Myh7	Myosin-7 OS=Mus musculus OX=10090 GN=Myh7 PE=2 SV=1	7.74e+18	0	1910.27	64	154	31438	32	35	1	96589.2	31438	154	78	>sp|Q91Z83|MYH7_MOUSE Myosin-7 OS=Mus musculus OX=10090 GN=Myh7 PE=2 SV=1	-1.29	-0.45	-1.07	-0.39	0.01	-0.43	0.57	-0.19	-0.26	0.06	-0.19	-0.94	-0.48	0	0.87	-0.31	-0.46	-1.75	-1.46	-0.13	-0.23	0.3	0.82	-0.57	0.47	-0.34	-0.02	-0.02	-0.28	-0.54	-0.28	0.22	0.39
E9QQ96	Obscn	Isoform of A2AAJ9, Obscurin OS=Mus musculus OX=10090 GN=Obscn PE=1 SV=2	-3.42e+18	0	1908.85	56	243	5085	0	9	1	18172.1	5085	243	0	>tr|E9QQ96|E9QQ96_MOUSE Isoform of A2AAJ9, Obscurin OS=Mus musculus OX=10090 GN=Obscn PE=1 SV=2	0.08	0.03	0.27	0.17	0.09	0.03	-0.03	0.12	-0.18	-0.13	0.2	-0.11	0.01	0.02	0.11	0.04	-0.01	-0.23	-0.06	-0.02	0.08	-0.07	-0.03	0.1	0.14	0.23	0.24	0.07	0.08	-0.04	0.04	-0.09	0.09
E9Q616	Ahnak	AHNAK nucleoprotein (desmoyokin) OS=Mus musculus OX=10090 GN=Ahnak PE=1 SV=1	-6.19e+17	0	1640.54	66	200	3109	196	200	1	10921.7	3109	200	0	>tr|E9Q616|E9Q616_MOUSE AHNAK nucleoprotein (desmoyokin) OS=Mus musculus OX=10090 GN=Ahnak PE=1 SV=1	0.27	0.35	0.24	0.22	-0.05	0.22	0	0.02	0.14	-0.07	-0.14	0.12	-0.06	-0.16	0.04	-0.1	-0.26	0.06	0.08	0.16	-0.29	-0.23	-0.38	-0.13	-0.12	0.21	0.16	0.2	-0.01	0.03	-0.27	-0.34	-0.08
Q02566	Myh6	Myosin-6 OS=Mus musculus OX=10090 GN=Myh6 PE=1 SV=2	1.02e+18	0	1561	57	135	28379	16	17	1	86079	28379	135	2	>sp|Q02566|MYH6_MOUSE Myosin-6 OS=Mus musculus OX=10090 GN=Myh6 PE=1 SV=2	NaN	-0.22	-0.17	0.04	-0.11	-0.14	0.59	NaN	0.23	-0.25	0	-0.11	-0.03	0.02	-0.07	-0.13	2.5	0.1	-0.05	0.02	NaN	0.01	-0.07	-0.08	NaN	-0.13	-0.25	NaN	-0.06	NaN	0.34	NaN	-0.04
Q8VHX6	Flnc	Filamin-C OS=Mus musculus OX=10090 GN=Flnc PE=1 SV=3	7.78e+18	0	1410.16	72	153	4782	0	135	1	16627.2	4782	153	18	>sp|Q8VHX6|FLNC_MOUSE Filamin-C OS=Mus musculus OX=10090 GN=Flnc PE=1 SV=3	0.07	0.03	0.14	0.12	-0.01	-0.02	0.22	-0.06	0.05	0.05	0.06	-0.19	-0.1	-0.14	0.12	-0.1	0.01	-0.16	-0.06	0.06	0.14	-0.03	0.13	-0.01	0.24	0.14	0.63	0.07	0.07	-0.07	0.06	0.1	0.42
P11531	Dmd	Dystrophin OS=Mus musculus OX=10090 GN=Dmd PE=1 SV=3	3.62e+16	0	1323.66	54	163	2859	142	160	1	10752.1	2859	163	3	>sp|P11531|DMD_MOUSE Dystrophin OS=Mus musculus OX=10090 GN=Dmd PE=1 SV=3	0.25	0.25	0.16	0.09	0.11	0.07	0.13	-0.01	0.06	0.15	0.1	-0.09	-0.08	-0.2	-0.1	-0.05	-0.14	-0.04	-0.02	-0.08	0.13	-0.08	-0.21	0.01	0.17	0.21	-0.01	0.15	-0.03	-0.12	-0.02	-0.02	0.16
Q62234	Myom1	Myomesin-1 OS=Mus musculus OX=10090 GN=Myom1 PE=1 SV=2	-4.05e+18	0	1201.29	82	115	6021	4	4	1	22162.3	6021	115	127	>sp|Q62234|MYOM1_MOUSE Myomesin-1 OS=Mus musculus OX=10090 GN=Myom1 PE=1 SV=2	0.17	0.17	0.26	0.19	0.18	0.21	0.12	0.21	0.12	0.25	0.3	0.08	0.13	0.12	0.17	0.08	0.03	0.16	0.13	-0.17	0.05	0.05	0.03	0.14	0.14	0.2	-0.27	0.19	0.09	0	0.21	0.18	0.12
Q9JHU4	Dync1h1	Cytoplasmic dynein 1 heavy chain 1 OS=Mus musculus OX=10090 GN=Dync1h1 PE=1 SV=2	-7.18e+18	0	1193.73	46	178	2251	169	178	1	7756.8	2251	178	0	>sp|Q9JHU4|DYHC1_MOUSE Cytoplasmic dynein 1 heavy chain 1 OS=Mus musculus OX=10090 GN=Dync1h1 PE=1 SV=2	0.13	-0.03	0.02	-0.01	-0.03	-0.01	0.01	0	-0.03	-0.09	-0.02	-0.02	-0.19	-0.19	-0.19	-0.07	-0.03	0.03	0.08	-0.15	-0.03	-0.09	-0.11	-0.18	-0.11	0.11	-0.21	-0.07	-0.04	-0.11	0.05	-0.07	0.08
Q14BI5	Myom2	Myomesin 2 OS=Mus musculus OX=10090 GN=Myom2 PE=1 SV=1	-1.04e+18	0	1188.37	79	108	8845	108	108	1	34059.3	8845	108	0	>tr|Q14BI5|Q14BI5_MOUSE Myomesin 2 OS=Mus musculus OX=10090 GN=Myom2 PE=1 SV=1	0.24	0.23	0.16	0.1	0.09	0.18	0.08	0.11	0.01	0.18	0.21	0.05	0.07	0.02	0.03	0.09	0.05	0.23	0.19	-0.3	-0.07	0	-0.05	0.15	0.08	0.09	-0.36	0.07	-0.02	-0.14	0.1	0.04	-0.03
Q62234-2	Myom1	Isoform of Q62234, Isoform 2 of Myomesin-1 OS=Mus musculus OX=10090 GN=Myom1	7.28e+18	0	1182.09	82	112	6037	0	1	1	22259.4	6037	112	0	>sp|Q62234-2|MYOM1_MOUSE Isoform of Q62234, Isoform 2 of Myomesin-1 OS=Mus musculus OX=10090 GN=Myom1	0.12	0.25	0.13	-0.07	0.23	-0.13	0.19	-0.07	0.1	-0.06	0.29	0.38	0.31	0.73	0.08	-0.24	0.62	0.32	0.15	-0.15	0.06	-0.17	0.22	-0.26	0.38	-0.34	0.52	0.28	0.16	-0.12	0.47	0.16	0.41
E9PWQ3	Col6a3	Collagen, type VI, alpha 3 OS=Mus musculus OX=10090 GN=Col6a3 PE=1 SV=2	8.82e+18	0	1124.49	53	128	4331	0	23	1	16459.9	4331	128	111	>tr|E9PWQ3|E9PWQ3_MOUSE Collagen, type VI, alpha 3 OS=Mus musculus OX=10090 GN=Col6a3 PE=1 SV=2	0.24	0.52	0.13	0.03	-0.11	-0.03	-0.25	-0.1	-0.22	-0.15	-0.18	0.33	-0.33	-0.12	-0.05	-0.04	-0.18	-0.23	-0.22	0.16	0	-0.09	0.07	-0.14	0.13	0.07	0.27	-0.07	0.17	0.05	-0.05	-0.05	-0.04
Q70KF4	Cmya5	Cardiomyopathy-associated protein 5 OS=Mus musculus OX=10090 GN=Cmya5 PE=1 SV=2	8.54e+18	0	1111.52	59	145	1709	24	24	1	6315.94	1709	145	129	>sp|Q70KF4|CMYA5_MOUSE Cardiomyopathy-associated protein 5 OS=Mus musculus OX=10090 GN=Cmya5 PE=1 SV=2	0.19	0.01	-0.2	-0.23	-0.09	0.03	0.04	-0.02	-0.02	-0.06	0.02	-0.17	-0.07	-0.19	-0.06	-0.26	-0.27	0.1	0.1	-0.13	0.03	-0.08	-0.18	-0.08	-0.09	-0.06	-0.28	0.02	-0.05	-0.13	0	-0.03	-0.17
E9QLJ0	Cmya5	Isoform of Q70KF4, Cardiomyopathy-associated protein 5 OS=Mus musculus OX=10090 GN=Cmya5 PE=1 SV=1	-2.94e+18	0	1084.06	58	140	1657	19	19	1	6144.4	1657	140	0	>tr|E9QLJ0|E9QLJ0_MOUSE Isoform of Q70KF4, Cardiomyopathy-associated protein 5 OS=Mus musculus OX=10090 GN=Cmya5 PE=1 SV=1	-0.03	-0.18	1.02	0.75	-0.28	-0.07	-0.07	0.02	-0.21	-0.55	-0.57	-0.53	-0.17	-0.09	-0.25	0.58	0.5	-0.61	-0.27	-0.27	0.1	0.53	0.25	-0.26	-0.03	0.67	0.84	0.08	-0.08	-0.16	-0.1	0.06	1.36
P13541	Myh3	Myosin-3 OS=Mus musculus OX=10090 GN=Myh3 PE=2 SV=2	-2.32e+18	0	1074.68	37	99	32043	15	15	1	99127	32043	99	0	>sp|P13541|MYH3_MOUSE Myosin-3 OS=Mus musculus OX=10090 GN=Myh3 PE=2 SV=2	-0.1	0.38	-0.42	-0.48	-0.11	0.07	0.08	-0.12	-0.11	0.14	-0.34	-0.29	-0.01	-0.35	-0.56	0.15	0.09	0.65	0.14	-0.3	-0.01	-0.17	-0.09	-0.32	0	-0.39	0	-0.11	0.09	-0.13	0.44	0.33	-0.09
P16546	Sptan1	Spectrin alpha chain, non-erythrocytic 1 OS=Mus musculus OX=10090 GN=Sptan1 PE=1 SV=4	-2.43e+17	0	1051.76	64	141	1893	0	2	1	7364.7	1893	141	149	>sp|P16546|SPTN1_MOUSE Spectrin alpha chain, non-erythrocytic 1 OS=Mus musculus OX=10090 GN=Sptan1 PE=1 SV=4	-0.13	0.07	-0.12	-0.06	-0.1	-0.02	-0.12	-0.22	0.05	-0.12	-0.02	0.28	0.03	0.21	0.35	0.14	-0.12	-0.15	-0.07	0.16	-0.05	-0.01	-0.07	0.17	0.05	-0.07	-0.06	-0.13	-0.05	0.13	-0.18	0.04	-0.18
A3KGU9	Sptan1	Isoform of P16546, Spectrin alpha chain, non-erythrocytic 1 OS=Mus musculus OX=10090 GN=Sptan1 PE=1 SV=2	-1.19e+18	0	1049.59	64	140	1899	0	0	1	7391.95	1899	140	1	>tr|A3KGU9|A3KGU9_MOUSE Isoform of P16546, Spectrin alpha chain, non-erythrocytic 1 OS=Mus musculus OX=10090 GN=Sptan1 PE=1 SV=2	NaN	-1.17	-0.3	-0.31	-0.57	NaN	-0.66	NaN	-0.69	-0.62	-0.24	-0.21	-0.27	-0.49	-0.75	-0.49	NaN	-0.5	-0.11	-0.68	NaN	NaN	-0.42	-0.82	NaN	NaN	-0.65	NaN	-0.54	NaN	-0.68	NaN	NaN
E9Q447	Sptan1	Isoform of P16546, Spectrin alpha chain, non-erythrocytic 1 OS=Mus musculus OX=10090 GN=Sptan1 PE=1 SV=1	-7.29e+18	0	1045.43	64	140	1885	0	1	1	7335.58	1885	140	0	>tr|E9Q447|E9Q447_MOUSE Isoform of P16546, Spectrin alpha chain, non-erythrocytic 1 OS=Mus musculus OX=10090 GN=Sptan1 PE=1 SV=1	NaN	NaN	NaN	NaN	NaN	NaN	NaN	NaN	-0.19	NaN	NaN	NaN	NaN	NaN	NaN	NaN	NaN	NaN	NaN	NaN	NaN	NaN	NaN	NaN	NaN	NaN	NaN	NaN	NaN	NaN	NaN	NaN	NaN
B1AR69	Myh13	Myosin, heavy polypeptide 13, skeletal muscle OS=Mus musculus OX=10090 GN=Myh13 PE=1 SV=1	5.38e+18	0	1027.14	36	83	28114	13	14	1	76887	28114	83	0	>tr|B1AR69|B1AR69_MOUSE Myosin, heavy polypeptide 13, skeletal muscle OS=Mus musculus OX=10090 GN=Myh13 PE=1 SV=1	-0.08	0.43	-0.04	-0.14	0.07	-0.17	-0.24	-0.29	0.42	-0.23	0.08	0.13	-0.15	-0.16	0.23	-0.14	0.01	0.83	0.14	-0.29	-0.3	-0.27	-0.12	0.12	-0.17	0.14	0.27	-0.36	-0.19	-0.55	-0.08	-0.17	-0.11
Q8R429	Atp2a1	Sarcoplasmic/endoplasmic reticulum calcium ATPase 1 OS=Mus musculus OX=10090 GN=Atp2a1 PE=1 SV=1	8.87e+18	0	1024.06	61	76	20600	45	45	1	74496.9	20600	76	41	>sp|Q8R429|AT2A1_MOUSE Sarcoplasmic/endoplasmic reticulum calcium ATPase 1 OS=Mus musculus OX=10090 GN=Atp2a1 PE=1 SV=1	0.27	0.28	0.07	-0.02	0.02	0.05	-0.01	0.11	-0.11	-0.04	0.22	0.06	0	-0.09	-0.03	-0.07	0.02	0.33	0.25	-0.23	-0.03	-0.14	-0.11	0.13	0.05	0.06	-0.13	0.09	-0.12	-0.18	0.03	-0.07	-0.13
Q3UGX2	Sptb	Isoform of P15508, Spectrin beta chain OS=Mus musculus OX=10090 GN=Sptb PE=1 SV=1	7.99e+18	0	955.21	64	122	1745	9	117	1	6508.18	1745	122	5	>tr|Q3UGX2|Q3UGX2_MOUSE Isoform of P15508, Spectrin beta chain OS=Mus musculus OX=10090 GN=Sptb PE=1 SV=1	0.08	0.06	0.03	0.05	0.01	-0.08	0.06	0.04	-0.01	0.07	0	-0.12	-0.16	-0.11	-0.09	-0.2	-0.2	0.01	-0.12	-0.02	0.03	0.02	0.01	-0.09	0.02	0.03	-0.03	0.09	-0.08	-0.15	-0.13	-0.06	-0.01
A0A087WS16	Col6a3	Isoform of E9PWQ3, Collagen, type VI, alpha 3 OS=Mus musculus OX=10090 GN=Col6a3 PE=1 SV=1	-4.66e+18	0	931.45	50	107	3933	0	2	1	14700.1	3933	107	0	>tr|A0A087WS16|A0A087WS16_MOUSE Isoform of E9PWQ3, Collagen, type VI, alpha 3 OS=Mus musculus OX=10090 GN=Col6a3 PE=1 SV=1	0.4	0.19	0.01	0.24	-0.11	0.22	-0.15	0.15	-0.11	-0.27	-0.25	0.24	-0.3	-0.16	0.03	0.2	-0.21	0.07	-0.01	0.27	-0.04	-0.09	-0.25	0.15	0.09	0.31	0.14	0.15	-0.07	0.35	-0.08	-0.07	-0.09
P70670	Naca	Nascent polypeptide-associated complex subunit alpha, muscle-specific form OS=Mus musculus OX=10090 GN=Naca PE=1 SV=2	-9.09e+18	0	895.119	60	93	2019	88	93	1	7338.94	2019	93	0	>sp|P70670|NACAM_MOUSE Nascent polypeptide-associated complex subunit alpha, muscle-specific form OS=Mus musculus OX=10090 GN=Naca PE=1 SV=2	0.01	-0.1	0.06	0	-0.04	-0.09	0	0	-0.03	0.05	-0.01	-0.18	-0.06	-0.15	-0.1	0.02	0.06	0.07	0.02	-0.09	0.06	-0.01	0.03	-0.02	0.1	-0.04	0.1	-0.01	0.01	-0.1	0.06	-0.04	0.11
O88990	Actn3	Alpha-actinin-3 OS=Mus musculus OX=10090 GN=Actn3 PE=2 SV=1	-3.83e+18	0	889.396	83	74	10527	59	59	1	40524.3	10527	74	16	>sp|O88990|ACTN3_MOUSE Alpha-actinin-3 OS=Mus musculus OX=10090 GN=Actn3 PE=2 SV=1	0.23	0.15	0.05	-0.03	-0.01	0.02	0.01	0.02	-0.14	0.1	0.16	0	-0.04	-0.12	-0.27	-0.03	0.07	0.19	0.11	-0.34	0	0.03	0.03	-0.12	-0.02	-0.12	-1.64	0.01	-0.04	-0.24	0.14	0.01	-0.04
F8VPN4	Agl	Amylo-1,6-glucosidase, 4-alpha-glucanotransferase OS=Mus musculus OX=10090 GN=Agl PE=1 SV=1	2.5e+18	0	878.832	75	87	3216	0	87	1	11994.8	3216	87	0	>tr|F8VPN4|F8VPN4_MOUSE Amylo-1,6-glucosidase, 4-alpha-glucanotransferase OS=Mus musculus OX=10090 GN=Agl PE=1 SV=1	0.21	0.07	-0.11	-0.18	0	-0.03	-0.21	-0.14	-0.29	-0.13	0.1	-0.18	-0.15	-0.34	-0.43	-0.06	0.05	0.24	0.18	-0.36	-0.05	0.02	-0.08	-0.18	-0.05	-0.13	-0.15	-0.08	0.02	-0.25	0.11	-0.04	0.2
Q5XKE0	Mybpc2	Myosin-binding protein C, fast-type OS=Mus musculus OX=10090 GN=Mybpc2 PE=1 SV=1	3.99e+18	0	875.457	74	84	7611	75	81	1	27098.9	7611	84	3	>sp|Q5XKE0|MYPC2_MOUSE Myosin-binding protein C, fast-type OS=Mus musculus OX=10090 GN=Mybpc2 PE=1 SV=1	0.31	0.29	0.12	0.02	0.03	0.22	0.05	0.08	-0.09	0.05	0.24	0.08	0.06	-0.01	-0.14	0.1	0.1	0.38	0.28	-0.32	-0.05	-0.01	-0.13	0.12	0.01	0.05	-0.7	0.02	-0.07	-0.2	0.09	0.01	0.01
E9PZ16	Hspg2	Isoform of Q05793, Basement membrane-specific heparan sulfate proteoglycan core protein OS=Mus musculus OX=10090 GN=Hspg2 PE=1 SV=1	-1.47e+18	0	865.88	37	104	1926	1	20	1	6924.52	1926	104	94	>tr|E9PZ16|E9PZ16_MOUSE Isoform of Q05793, Basement membrane-specific heparan sulfate proteoglycan core protein OS=Mus musculus OX=10090 GN=Hspg2 PE=1 SV=1	0.01	0.05	0.05	0.05	0.09	0.07	0.09	-0.07	0.22	0.13	0.09	0.1	-0.12	0.06	-0.05	0.11	0.23	-0.04	0.05	0.09	0.08	-0.03	0.1	0.11	0.12	0.05	0.43	0.11	0.11	0.01	0.04	0.05	0.05
Q62261	Sptbn1	Spectrin beta chain, non-erythrocytic 1 OS=Mus musculus OX=10090 GN=Sptbn1 PE=1 SV=2	-3.21e+18	0	802.719	61	118	1303	10	113	1	4672.17	1303	118	0	>sp|Q62261|SPTB2_MOUSE Spectrin beta chain, non-erythrocytic 1 OS=Mus musculus OX=10090 GN=Sptbn1 PE=1 SV=2	-0.1	0	-0.11	-0.01	-0.06	0.13	-0.05	-0.11	0.15	-0.08	-0.08	0.21	0.08	0.16	0.25	0.2	-0.07	-0.09	-0.08	0.14	-0.03	-0.06	-0.06	0.02	0.02	-0.11	0.02	-0.18	0.01	0.16	-0.11	0.06	-0.09
P19096	Fasn	Fatty acid synthase OS=Mus musculus OX=10090 GN=Fasn PE=1 SV=2	-2.42e+18	0	791.283	54	97	1776	1	97	1	6143.51	1776	97	0	>sp|P19096|FAS_MOUSE Fatty acid synthase OS=Mus musculus OX=10090 GN=Fasn PE=1 SV=2	-0.54	0.37	-0.46	1.14	-0.3	1.08	0.32	-0.57	1.54	-0.31	0.53	2.06	2.29	2.65	2.18	2.35	0.32	-0.56	-0.52	2.05	0.64	1.29	0.89	1.94	0.45	-0.15	0.8	-0.81	0.44	2.15	0.19	1.78	-0.47
Q9WUB3	Pygm	Glycogen phosphorylase, muscle form OS=Mus musculus OX=10090 GN=Pygm PE=1 SV=3	2.11e+17	0	778.732	75	80	9849	1	61	1	32427.4	9849	80	20	>sp|Q9WUB3|PYGM_MOUSE Glycogen phosphorylase, muscle form OS=Mus musculus OX=10090 GN=Pygm PE=1 SV=3	0.11	0.09	0.11	0.05	0	-0.05	0.19	0.1	0.1	0.25	-0.02	-0.16	-0.09	-0.21	-0.32	-0.03	0.01	0.2	0.1	-0.19	0.11	0.21	0.1	-0.14	-0.08	0.02	-0.19	0.08	0	-0.21	0.14	0.01	0.07
Q60847	Col12a1	Collagen alpha-1(XII) chain OS=Mus musculus OX=10090 GN=Col12a1 PE=2 SV=3	-8.79e+18	0	778.579	48	109	1649	0	109	1	6354.1	1649	109	0	>sp|Q60847|COCA1_MOUSE Collagen alpha-1(XII) chain OS=Mus musculus OX=10090 GN=Col12a1 PE=2 SV=3	0.43	1.03	0.13	-0.42	-0.13	0.07	-0.33	-0.44	-0.67	-0.53	-0.46	0.07	-0.7	-0.29	-0.27	-0.3	-0.57	-1.32	-0.66	-0.12	0.41	-0.7	-0.34	-0.97	0.43	0.17	0.05	-0.12	0.27	-0.45	-0.22	-0.23	-0.03
Q9JI91	Actn2	Alpha-actinin-2 OS=Mus musculus OX=10090 GN=Actn2 PE=1 SV=2	2.94e+18	0	750.573	76	64	5386	33	45	1	19187.5	5386	64	7	>sp|Q9JI91|ACTN2_MOUSE Alpha-actinin-2 OS=Mus musculus OX=10090 GN=Actn2 PE=1 SV=2	-0.51	-0.36	-0.2	-0.07	0.12	-0.42	0.08	-0.03	0.03	-0.09	-0.01	-0.38	-0.27	-0.13	0.21	-0.11	-0.14	-0.6	-0.11	-0.12	0.11	-0.01	0.11	-0.43	0.26	0.37	1.32	0.24	-0.08	-0.15	-0.28	-0.08	0.03
P68134	Acta1	Actin, alpha skeletal muscle OS=Mus musculus OX=10090 GN=Acta1 PE=1 SV=1	3.25e+18	0	742.418	80	44	36177	3	3	1	130954	36177	44	60	>sp|P68134|ACTS_MOUSE Actin, alpha skeletal muscle OS=Mus musculus OX=10090 GN=Acta1 PE=1 SV=1	0.12	0.14	0.07	0.02	0.05	0.02	0.04	0.03	-0.1	0.06	0.14	-0.01	0	-0.04	-0.14	-0.02	0.05	0.12	0.07	-0.17	0.07	0.01	0.01	-0.11	0.03	-0.04	-0.32	0.05	-0.08	-0.21	0.05	-0.01	-0.02
Q05793	Hspg2	Basement membrane-specific heparan sulfate proteoglycan core protein OS=Mus musculus OX=10090 GN=Hspg2 PE=1 SV=1	6.65e+18	0	739.695	36	88	1636	4	4	1	5900.72	1636	88	0	>sp|Q05793|PGBM_MOUSE Basement membrane-specific heparan sulfate proteoglycan core protein OS=Mus musculus OX=10090 GN=Hspg2 PE=1 SV=1	0.35	0.18	0.1	0.41	-1.79	NaN	-2.34	-0.42	-1.08	-1.62	-0.09	-2.72	-0.4	0.17	-2.02	-0.36	NaN	0.22	0.18	-3.11	-0.64	0.25	0.31	-2.71	-0.51	NaN	-0.31	-0.44	0.22	-0.01	0.14	0	-2.92
F6RDH3	Neb	Isoform of E9Q1W3, Nebulin (Fragment) OS=Mus musculus OX=10090 GN=Neb PE=1 SV=8	-4.8e+18	0	712.93	77	77	5017	1	1	1	14873.2	5017	77	0	>tr|F6RDH3|F6RDH3_MOUSE Isoform of E9Q1W3, Nebulin (Fragment) OS=Mus musculus OX=10090 GN=Neb PE=1 SV=8	0.36	0.08	0.18	0.13	-0.04	0.06	0.17	0.12	0.15	0.19	0.35	0.02	0.06	0.01	-0.04	0.17	-0.03	0.26	0.31	-0.15	0.01	-0.07	-0.15	0.18	0.16	0.1	-0.45	0.12	0.07	-0.2	0.13	0.03	-0.16
Q8BTM8	Flna	Filamin-A OS=Mus musculus OX=10090 GN=Flna PE=1 SV=5	7.03e+18	0	696.067	52	95	1187	0	83	1	4221.36	1187	95	0	>sp|Q8BTM8|FLNA_MOUSE Filamin-A OS=Mus musculus OX=10090 GN=Flna PE=1 SV=5	-0.55	-0.47	-0.49	-0.08	-0.29	-0.12	-0.17	-0.34	0.12	-0.1	-0.12	0.35	-0.16	0.11	-0.12	-0.04	-0.03	0.18	-0.05	0.38	-0.04	0.14	0.15	0.19	-0.13	0.03	0.1	-0.23	-0.16	0.18	-0.18	-0.21	-0.12
Q8VDD5	Myh9	Myosin-9 OS=Mus musculus OX=10090 GN=Myh9 PE=1 SV=4	5.04e+18	0	690.276	50	88	1370	56	70	1	5201.33	1370	88	5	>sp|Q8VDD5|MYH9_MOUSE Myosin-9 OS=Mus musculus OX=10090 GN=Myh9 PE=1 SV=4	-0.2	-0.03	-0.09	0.08	-0.25	-0.05	0.01	-0.12	0.22	-0.06	-0.15	0.43	0.07	0.43	0.29	0.08	0.27	-0.17	-0.19	0.56	-0.16	0.03	0.08	0.83	-0.05	-0.01	0.28	-0.12	-0.09	0.58	-0.11	0.22	-0.11
Q60675	Lama2	Laminin subunit alpha-2 OS=Mus musculus OX=10090 GN=Lama2 PE=1 SV=2	-1.11e+18	0	685.967	38	99	1711	26	63	1	5961.62	1711	99	40	>sp|Q60675|LAMA2_MOUSE Laminin subunit alpha-2 OS=Mus musculus OX=10090 GN=Lama2 PE=1 SV=2	0.11	0.12	0.08	0.06	0.12	0.08	0.04	-0.04	0.07	0.08	0.06	-0.05	0.01	-0.06	0.14	-0.07	-0.06	0.01	0.09	0.02	0.13	-0.07	-0.04	0.21	0.24	0.08	-0.03	0.17	0.02	-0.11	-0.06	-0.06	-0.09
P62737	Acta2	Actin, aortic smooth muscle OS=Mus musculus OX=10090 GN=Acta2 PE=1 SV=1	2.84e+18	0	668.833	80	43	32205	0	3	1	112830	32205	43	0	>sp|P62737|ACTA_MOUSE Actin, aortic smooth muscle OS=Mus musculus OX=10090 GN=Acta2 PE=1 SV=1	-0.51	-0.67	0.29	0.2	0.34	0.31	-0.16	0.01	-0.32	-0.09	0.51	0.38	-0.13	-0.22	-0.4	0.18	0.28	-0.27	-0.67	-0.11	0.05	0.23	0.25	-0.33	-0.17	-0.15	-0.9	0.22	-0.42	-0.67	-0.33	-0.55	-0.11
Q6P6L5	Mybpc1	Isoform of D3YU50, Myosin-binding protein C, slow-type OS=Mus musculus OX=10090 GN=Mybpc1 PE=1 SV=1	5.97e+17	0	668.752	66	67	3795	4	4	1	13023.9	3795	67	73	>tr|Q6P6L5|Q6P6L5_MOUSE Isoform of D3YU50, Myosin-binding protein C, slow-type OS=Mus musculus OX=10090 GN=Mybpc1 PE=1 SV=1	-0.24	-0.1	-0.14	-0.07	0.06	-0.51	-0.09	-0.23	0.1	-0.01	-0.08	-0.28	-0.17	-0.03	0.36	-0.08	0	-0.96	-0.5	0.13	0.19	0.12	0.17	-0.13	0.3	0.27	0.34	0.3	-0.21	-0.18	-0.3	-0.13	-0.17
A0A338P6K2	Myh11	Isoform of O08638, Myosin-11 OS=Mus musculus OX=10090 GN=Myh11 PE=4 SV=1	-8.75e+17	0	666.197	51	92	2212	1	1	1	7245.12	2212	92	0	>tr|A0A338P6K2|A0A338P6K2_MOUSE Isoform of O08638, Myosin-11 OS=Mus musculus OX=10090 GN=Myh11 PE=4 SV=1	NaN	NaN	NaN	NaN	NaN	-0.45	NaN	NaN	NaN	NaN	NaN	NaN	NaN	NaN	NaN	NaN	NaN	NaN	NaN	NaN	NaN	-0.09	NaN	NaN	NaN	NaN	NaN	NaN	NaN	NaN	NaN	NaN	NaN
E9QPE7	Myh11	Isoform of O08638, Myosin-11 OS=Mus musculus OX=10090 GN=Myh11 PE=1 SV=2	6.48e+18	0	665.232	51	92	2218	0	1	1	7258.4	2218	92	96	>tr|E9QPE7|E9QPE7_MOUSE Isoform of O08638, Myosin-11 OS=Mus musculus OX=10090 GN=Myh11 PE=1 SV=2	-0.33	-0.56	-0.46	0.02	-0.15	-0.03	0	-0.28	0.24	-0.06	0.1	0.38	0.02	0.18	-0.01	0.08	-0.17	0.26	0.23	0.28	0.02	0.12	0.07	0.03	-0.03	0.18	-0.08	-0.07	0.01	0.07	-0.1	-0.28	-0.12
A0A1L1SQ51	Tln2	Isoform of Q71LX4, Talin-2 OS=Mus musculus OX=10090 GN=Tln2 PE=1 SV=1	2.39e+18	0	662.27	50	90	961	0	76	1	3490.73	961	90	1	>tr|A0A1L1SQ51|A0A1L1SQ51_MOUSE Isoform of Q71LX4, Talin-2 OS=Mus musculus OX=10090 GN=Tln2 PE=1 SV=1	0.01	0.13	0.12	0.09	0.08	0.15	-0.09	-0.11	-0.14	-0.08	0.01	-0.1	-0.2	-0.29	-0.23	-0.05	-0.19	-0.19	-0.15	0.01	0.26	-0.18	-0.03	-0.2	0.09	0.15	-0.17	0.12	-0.03	-0.21	-0.12	-0.14	-0.05
F6X9B6	Neb	Isoform of E9Q1W3, Nebulin (Fragment) OS=Mus musculus OX=10090 GN=Neb PE=1 SV=1	-2.85e+18	0	660.127	76	58	3010	2	2	1	9757.67	3010	58	0	>tr|F6X9B6|F6X9B6_MOUSE Isoform of E9Q1W3, Nebulin (Fragment) OS=Mus musculus OX=10090 GN=Neb PE=1 SV=1	0.56	-0.11	0.08	-0.03	0.14	-0.16	0.13	0.19	0.31	0.51	0.23	0.06	0.1	-0.04	-0.21	-0.18	0.08	0.36	0.06	0	-0.01	0.12	-0.11	-0.23	0.17	-0.05	-0.27	0.18	0.17	-0.02	0.29	0.14	-0.05
D3YU50	Mybpc1	Myosin-binding protein C, slow-type OS=Mus musculus OX=10090 GN=Mybpc1 PE=1 SV=1	7.83e+18	0	653.052	67	66	3727	3	3	1	12818.5	3727	66	0	>tr|D3YU50|D3YU50_MOUSE Myosin-binding protein C, slow-type OS=Mus musculus OX=10090 GN=Mybpc1 PE=1 SV=1	0.76	0.69	0.13	NaN	-0.32	-0.33	-0.1	-1	-0.23	-0.22	-0.29	NaN	-0.58	-0.91	NaN	0.14	-0.22	NaN	-0.75	-0.2	-0.26	-0.27	-1.1	-0.1	0.46	0.81	-0.43	0.09	-0.49	-1.01	-0.47	-0.54	-0.48
P26039	Tln1	Talin-1 OS=Mus musculus OX=10090 GN=Tln1 PE=1 SV=2	8.36e+18	0	634.718	51	92	1115	62	79	1	3843.18	1115	92	15	>sp|P26039|TLN1_MOUSE Talin-1 OS=Mus musculus OX=10090 GN=Tln1 PE=1 SV=2	-0.12	-0.07	-0.08	0	-0.01	-0.02	-0.04	-0.15	0.18	0	-0.04	0.23	0.05	0.25	0.21	0	0.01	-0.09	-0.11	0.15	-0.01	-0.05	0.03	0.24	0	-0.01	0.19	-0.03	-0.02	0.18	-0.11	0.04	-0.04
Q60597	Ogdh	2-oxoglutarate dehydrogenase, mitochondrial OS=Mus musculus OX=10090 GN=Ogdh PE=1 SV=3	-1.81e+18	0	620.979	60	52	2113	1	1	1	8306.72	2113	52	0	>sp|Q60597|ODO1_MOUSE 2-oxoglutarate dehydrogenase, mitochondrial OS=Mus musculus OX=10090 GN=Ogdh PE=1 SV=3	-0.14	-0.83	-0.06	-0.05	0.34	-0.35	0.32	0.1	0.58	0.6	0.63	0.23	0.14	0.45	0.68	-0.18	0.49	-0.35	-0.04	0.3	0.61	0.59	0.58	0.29	0.51	0.34	-0.41	0.1	0.11	-0.26	0.59	0.7	0.45
Q60597-3	Ogdh	Isoform of Q60597, Isoform 3 of 2-oxoglutarate dehydrogenase, mitochondrial OS=Mus musculus OX=10090 GN=Ogdh	-2.63e+18	0	606.311	58	52	2075	1	1	1	8201.4	2075	52	67	>sp|Q60597-3|ODO1_MOUSE Isoform of Q60597, Isoform 3 of 2-oxoglutarate dehydrogenase, mitochondrial OS=Mus musculus OX=10090 GN=Ogdh	-0.03	0.11	-0.03	-0.05	0.08	-0.07	0.11	-0.07	0.15	0.07	0.08	-0.18	0.1	0.01	0.18	0.17	0.02	-0.13	0.09	-0.16	0.04	0.02	-0.1	-0.07	0.15	0.12	-0.06	0.13	0.02	0.01	0.06	0.13	-0.04
F6TJX7	Obscn	Isoform of A2AAJ9, Obscurin (Fragment) OS=Mus musculus OX=10090 GN=Obscn PE=1 SV=1	-6.8e+18	0	589.259	41	72	1286	1	1	1	4823.27	1286	72	0	>tr|F6TJX7|F6TJX7_MOUSE Isoform of A2AAJ9, Obscurin (Fragment) OS=Mus musculus OX=10090 GN=Obscn PE=1 SV=1	NaN	NaN	NaN	1.25	NaN	NaN	-0.84	NaN	-0.34	0.36	NaN	-1.04	NaN	NaN	1.1	NaN	NaN	1.8	1.3	1.13	NaN	NaN	NaN	0.52	NaN	NaN	NaN	NaN	-0.44	NaN	-0.25	NaN	1.34
P52480-2	Pkm	Isoform of P52480, Isoform M1 of Pyruvate kinase PKM OS=Mus musculus OX=10090 GN=Pkm	7.4e+18	0	576.376	73	44	7847	5	5	1	30103.2	7847	44	49	>sp|P52480-2|KPYM_MOUSE Isoform of P52480, Isoform M1 of Pyruvate kinase PKM OS=Mus musculus OX=10090 GN=Pkm	0.1	0.11	0.12	0.07	0.1	0.09	0.1	0.08	0.08	0.23	0.1	0.03	0.08	0.07	0.02	-0.01	0.07	0.09	0.04	-0.27	-0.07	0.08	0.05	-0.09	-0.04	0.01	-0.32	0.06	-0.02	-0.16	0.14	0.05	0.1
P07310	Ckm	Creatine kinase M-type OS=Mus musculus OX=10090 GN=Ckm PE=1 SV=1	-7.7e+18	0	570.848	91	46	20802	6	45	1	72000.4	20802	46	1	>sp|P07310|KCRM_MOUSE Creatine kinase M-type OS=Mus musculus OX=10090 GN=Ckm PE=1 SV=1	0.2	0.16	0.14	0.04	0.07	0.18	0.07	0.05	-0.04	0.1	0.21	0.08	0.06	0.02	-0.03	0.01	0.03	0.19	0.1	-0.13	0.08	0.1	0.1	0.03	0.04	0.12	-0.41	0.11	-0.08	-0.19	0.1	0.05	0.02
E9QQ25	Speg	Isoform of Q62407, Striated muscle-specific serine/threonine-protein kinase OS=Mus musculus OX=10090 GN=Speg PE=1 SV=1	8.99e+17	0	567.172	38	85	1009	0	1	1	3507.85	1009	85	0	>tr|E9QQ25|E9QQ25_MOUSE Isoform of Q62407, Striated muscle-specific serine/threonine-protein kinase OS=Mus musculus OX=10090 GN=Speg PE=1 SV=1	0.28	0.2	0.32	0.48	0.23	0.26	0.42	0.34	-0.61	NaN	0.38	0.27	0.29	0.3	0.22	0.13	0.07	0.4	0	-1.57	-0.53	0.41	0.5	0.27	0.21	0.02	0.6	0.47	0.33	0.2	0.3	0.05	0.05
Q62407	Speg	Striated muscle-specific serine/threonine-protein kinase OS=Mus musculus OX=10090 GN=Speg PE=1 SV=2	7.55e+18	0	564.533	38	85	1010	0	1	1	3505.36	1010	85	88	>sp|Q62407|SPEG_MOUSE Striated muscle-specific serine/threonine-protein kinase OS=Mus musculus OX=10090 GN=Speg PE=1 SV=2	0.04	-0.07	0	-0.07	-0.07	-0.22	-0.11	0	-0.19	-0.06	-0.01	-0.21	0	-0.02	-0.21	-0.04	-0.09	-0.11	-0.12	0.04	0.21	0.02	-0.01	-0.25	-0.02	-0.16	0.39	0.05	-0.11	-0.18	-0.06	-0.11	0.03
S4R1W1	Gm3839	Glyceraldehyde-3-phosphate dehydrogenase OS=Mus musculus OX=10090 GN=Gm3839 PE=1 SV=1	4.94e+18	0	559.226	92	35	13047	1	32	1	56169.2	13047	35	7	>tr|S4R1W1|S4R1W1_MOUSE Glyceraldehyde-3-phosphate dehydrogenase OS=Mus musculus OX=10090 GN=Gm3839 PE=1 SV=1	-0.08	0.01	0.03	0.03	-0.06	-0.08	0	-0.07	-0.13	0.03	-0.03	-0.09	-0.01	0.05	-0.04	-0.14	0	-0.04	-0.07	-0.11	0.05	-0.03	-0.04	-0.13	-0.13	-0.2	-0.24	-0.01	-0.12	-0.2	0.06	0.05	-0.02
A6ZI44	Aldoa	Isoform of P05064, Fructose-bisphosphate aldolase OS=Mus musculus OX=10090 GN=Aldoa PE=1 SV=1	8.98e+18	0	554.199	85	43	15345	0	4	1	57891.1	15345	43	43	>tr|A6ZI44|A6ZI44_MOUSE Isoform of P05064, Fructose-bisphosphate aldolase OS=Mus musculus OX=10090 GN=Aldoa PE=1 SV=1	0.05	0.06	0.17	0.1	-0.01	-0.09	-0.06	-0.02	-0.22	-0.03	0.1	-0.01	0.06	0.08	-0.04	-0.16	-0.02	0.13	0.08	-0.05	0.16	0.05	0.09	-0.09	0	-0.14	-0.08	0.16	-0.07	-0.23	0.03	-0.08	0.02
P47857-3	Pfkm	Isoform of P47857, Isoform 3 of ATP-dependent 6-phosphofructokinase, muscle type OS=Mus musculus OX=10090 GN=Pfkm	-1.75e+18	0	552.78	51	36	4740	0	32	1	17230.1	4740	36	6	>sp|P47857-3|PFKAM_MOUSE Isoform of P47857, Isoform 3 of ATP-dependent 6-phosphofructokinase, muscle type OS=Mus musculus OX=10090 GN=Pfkm	0.17	0.15	0.25	0.2	0.04	0.07	0.03	0.11	-0.06	0.13	0.05	-0.08	-0.04	-0.13	-0.2	0.02	0	0.26	0.18	-0.17	-0.02	0.05	0.07	-0.34	-0.26	0.02	-0.36	0.04	-0.01	-0.23	0.17	-0.02	0.11
A0A0N4SVX9	Dysf	Isoform of Q9ESD7, Dysferlin OS=Mus musculus OX=10090 GN=Dysf PE=1 SV=1	-5.87e+18	0	548.139	49	78	1011	0	76	1	3501.92	1011	78	2	>tr|A0A0N4SVX9|A0A0N4SVX9_MOUSE Isoform of Q9ESD7, Dysferlin OS=Mus musculus OX=10090 GN=Dysf PE=1 SV=1	-1.98	-2.36	0.62	0.59	-0.28	-0.28	-0.25	-0.24	-0.26	-0.23	-0.17	-0.39	-0.23	-0.2	-0.36	-0.41	-0.21	0.65	0.6	0.73	1	-0.5	-0.53	0.49	0.63	0.58	0.77	0.63	-0.32	-0.47	-0.37	-0.48	-0.04
Q5SXR6	Cltc	Isoform of Q68FD5, Clathrin heavy chain OS=Mus musculus OX=10090 GN=Cltc PE=1 SV=1	-3.51e+18	0	544.804	48	62	1077	0	62	1	4171.58	1077	62	0	>tr|Q5SXR6|Q5SXR6_MOUSE Isoform of Q68FD5, Clathrin heavy chain OS=Mus musculus OX=10090 GN=Cltc PE=1 SV=1	0.09	0.09	-0.02	-0.04	-0.06	0.11	-0.06	-0.03	0.11	0	-0.04	0.17	-0.05	0	-0.03	0.11	0.07	-0.03	-0.01	0.22	0.03	0	0	0.12	-0.06	0.22	0.04	-0.13	0	0.15	0.01	0.01	-0.09
P56480	Atp5f1b	ATP synthase subunit beta, mitochondrial OS=Mus musculus OX=10090 GN=Atp5f1b PE=1 SV=2	-2.23e+18	0	538.724	74	29	5147	29	29	1	20293.3	5147	29	0	>sp|P56480|ATPB_MOUSE ATP synthase subunit beta, mitochondrial OS=Mus musculus OX=10090 GN=Atp5f1b PE=1 SV=2	-0.51	-0.48	-0.05	0.01	-0.12	-0.31	0.07	0.14	0.14	0.08	0.04	-0.15	-0.03	0.08	0.25	-0.25	-0.26	-0.21	0	0.06	0.22	0.2	0.25	-0.09	0.11	0.01	0.14	0.21	-0.22	-0.29	-0.28	-0.23	0.14
A2AT68	Ttn	Isoform of A2ASS6, Titin (Fragment) OS=Mus musculus OX=10090 GN=Ttn PE=1 SV=1	-3.25e+18	0	518.742	60	68	2752	0	2	1	9404.35	2752	68	0	>tr|A2AT68|A2AT68_MOUSE Isoform of A2ASS6, Titin (Fragment) OS=Mus musculus OX=10090 GN=Ttn PE=1 SV=1	0	0.07	0.14	-0.03	-0.03	0.64	0.13	-0.49	-0.1	-0.03	0.07	-0.12	-0.04	0.05	0.04	0.03	0.04	0.12	0	-0.36	-0.02	0.05	-0.12	0.05	0.2	-0.08	0.03	-0.07	0	-0.23	-0.01	-0.14	0.11
P21550	Eno3	Beta-enolase OS=Mus musculus OX=10090 GN=Eno3 PE=1 SV=3	2.5e+18	0	518.708	80	43	10826	5	34	1	35885.7	10826	43	10	>sp|P21550|ENOB_MOUSE Beta-enolase OS=Mus musculus OX=10090 GN=Eno3 PE=1 SV=3	0.09	0.06	0.18	0.14	0.08	0.11	0.07	0.17	0.01	0.19	0.09	-0.02	0.06	0.08	0.04	0.01	0.06	0.09	0.09	-0.12	0.03	0.09	0.06	0.01	0	0.08	-0.24	0.17	0.01	-0.12	0.17	0.1	0.05
O35452	Tnxb	Tenascin X OS=Mus musculus OX=10090 GN=Tnxb PE=1 SV=1	-3.26e+18	0	518.095	31	79	823	6	79	1	2900.42	823	79	0	>tr|O35452|O35452_MOUSE Tenascin X OS=Mus musculus OX=10090 GN=Tnxb PE=1 SV=1	0.27	0.86	0.12	-0.29	-0.02	-0.05	-0.44	-0.32	-0.45	0.02	-0.12	0.39	-0.26	-0.15	0.18	-0.13	-0.31	-0.13	-0.26	0.09	-0.08	-0.3	-0.15	-0.21	0.05	0.04	0.26	-0.13	0.24	-0.11	-0.3	-0.2	-0.33
Q64727	Vcl	Vinculin OS=Mus musculus OX=10090 GN=Vcl PE=1 SV=4	-8.97e+18	0	516.321	71	71	1374	66	71	1	4750.39	1374	71	0	>sp|Q64727|VINC_MOUSE Vinculin OS=Mus musculus OX=10090 GN=Vcl PE=1 SV=4	0.02	0.09	-0.1	-0.07	-0.05	-0.07	-0.09	-0.33	-0.08	-0.16	-0.02	0	-0.08	-0.03	0	-0.08	-0.11	0	-0.01	0.27	0.29	-0.05	-0.01	0.01	0.09	0.07	-0.09	-0.04	-0.14	-0.11	-0.15	-0.07	0.02
P52480	Pkm	Pyruvate kinase PKM OS=Mus musculus OX=10090 GN=Pkm PE=1 SV=4	-8.75e+18	0	514.209	70	42	6162	3	3	1	23834	6162	42	0	>sp|P52480|KPYM_MOUSE Pyruvate kinase PKM OS=Mus musculus OX=10090 GN=Pkm PE=1 SV=4	-0.05	0.07	-0.14	0.05	-0.2	0.27	-0.01	-0.45	0.27	-0.1	-0.06	0.74	0.66	0.91	0.92	0.65	0.31	-0.48	-0.25	0.45	-0.19	0.16	0.3	0.78	0.07	0.02	0.33	-0.16	0.1	0.93	-0.05	0.47	-0.03
P07724	Alb	Serum albumin OS=Mus musculus OX=10090 GN=Alb PE=1 SV=3	5.31e+18	0	510.608	83	49	4043	49	49	1	13665.9	4043	49	0	>sp|P07724|ALBU_MOUSE Serum albumin OS=Mus musculus OX=10090 GN=Alb PE=1 SV=3	0.03	0.27	-0.05	-0.08	-0.27	-0.15	0.02	-0.41	-0.02	-0.17	0.24	0.5	-0.23	0.19	0.2	-0.01	0.27	0.11	-0.08	0.43	0	-0.2	0.07	0.08	0.22	-0.18	0.38	-0.19	-0.15	0.04	0.03	0.14	-0.19
Q6PIE5	Atp1a2	Sodium/potassium-transporting ATPase subunit alpha-2 OS=Mus musculus OX=10090 GN=Atp1a2 PE=1 SV=1	4.33e+18	0	496.585	52	47	1476	2	31	1	5339.9	1476	47	20	>sp|Q6PIE5|AT1A2_MOUSE Sodium/potassium-transporting ATPase subunit alpha-2 OS=Mus musculus OX=10090 GN=Atp1a2 PE=1 SV=1	-0.09	0.04	0.09	0.06	0.27	-0.11	-0.02	-0.25	-0.12	-0.16	0.42	0.1	0.1	0.09	0.29	-0.22	0.02	-0.21	0.06	0.01	0.11	-0.24	-0.09	0.32	0.51	0.07	0.06	0.3	-0.04	-0.07	-0.16	0	-0.03
O55143	Atp2a2	Sarcoplasmic/endoplasmic reticulum calcium ATPase 2 OS=Mus musculus OX=10090 GN=Atp2a2 PE=1 SV=2	1.91e+18	0	495.195	46	48	7445	1	23	1	26974.2	7445	48	2	>sp|O55143|AT2A2_MOUSE Sarcoplasmic/endoplasmic reticulum calcium ATPase 2 OS=Mus musculus OX=10090 GN=Atp2a2 PE=1 SV=2	-0.66	-0.4	-0.96	-0.51	-0.1	-0.34	0.14	-0.15	-0.4	-0.23	-0.26	-0.87	-0.44	-0.17	0.52	-0.2	-0.07	-1.27	-0.94	-0.15	-0.13	0.08	0.47	-0.53	0.28	-0.44	-0.13	-0.06	-0.39	-0.38	-0.3	-0.02	0.18
Q01853	Vcp	Transitional endoplasmic reticulum ATPase OS=Mus musculus OX=10090 GN=Vcp PE=1 SV=4	-6.9e+18	0	485.717	72	51	1463	50	50	1	5567.26	1463	51	1	>sp|Q01853|TERA_MOUSE Transitional endoplasmic reticulum ATPase OS=Mus musculus OX=10090 GN=Vcp PE=1 SV=4	0.01	0	0.07	0.03	-0.06	0.03	0.15	0.03	0.08	0.14	0.14	0.13	-0.05	0.01	-0.11	-0.11	0.13	0.06	0.02	-0.12	0.06	0.09	0.12	0	0.03	0.07	0.07	0.03	-0.03	-0.11	0.1	0.07	-0.03
E9QPD7	Pcx	Isoform of Q05920, Pyruvate carboxylase OS=Mus musculus OX=10090 GN=Pcx PE=1 SV=1	5.67e+18	0	475.419	57	50	1256	0	1	1	4848.11	1256	50	57	>tr|E9QPD7|E9QPD7_MOUSE Isoform of Q05920, Pyruvate carboxylase OS=Mus musculus OX=10090 GN=Pcx PE=1 SV=1	0.44	0.29	0.42	0.57	-0.52	-0.16	-0.2	0.65	0.08	-0.3	-0.57	0.15	0.34	0.59	0.17	0.94	0.61	-0.05	-0.01	-0.03	-0.3	0.08	-0.12	-0.25	-0.67	0.41	0.61	0.25	0.07	0.45	0.03	0.35	0.54
Q8CGC7	Eprs	Bifunctional glutamate/proline--tRNA ligase OS=Mus musculus OX=10090 GN=Eprs PE=1 SV=4	2.6e+18	0	472.646	50	57	947	54	57	1	3510.99	947	57	0	>sp|Q8CGC7|SYEP_MOUSE Bifunctional glutamate/proline--tRNA ligase OS=Mus musculus OX=10090 GN=Eprs PE=1 SV=4	0.05	-0.06	0.09	0.04	-0.08	-0.13	-0.12	0.03	-0.17	-0.11	-0.15	-0.18	-0.15	-0.34	-0.27	0.02	0.1	0.16	0.05	-0.31	-0.18	0.11	0.09	-0.14	-0.13	0.23	0.08	-0.15	0.08	0.03	0.25	0.15	0.24
Q05920	Pc	Pyruvate carboxylase, mitochondrial OS=Mus musculus OX=10090 GN=Pc PE=1 SV=1	-5.27e+18	0	466.607	57	50	1231	1	1	1	4724.66	1231	50	0	>sp|Q05920|PYC_MOUSE Pyruvate carboxylase, mitochondrial OS=Mus musculus OX=10090 GN=Pc PE=1 SV=1	NaN	NaN	0.23	NaN	NaN	NaN	NaN	NaN	NaN	NaN	0.07	NaN	NaN	0.17	NaN	NaN	NaN	NaN	NaN	NaN	NaN	NaN	NaN	NaN	NaN	NaN	-0.05	NaN	NaN	NaN	NaN	NaN	NaN
Q7TQ48	Srl	Sarcalumenin OS=Mus musculus OX=10090 GN=Srl PE=1 SV=1	-3.73e+18	0	461.47	52	36	2615	10	36	1	8876.51	2615	36	0	>sp|Q7TQ48|SRCA_MOUSE Sarcalumenin OS=Mus musculus OX=10090 GN=Srl PE=1 SV=1	0.19	0.16	-0.07	-0.06	-0.03	-0.18	-0.22	0.15	-0.27	-0.15	0.09	-0.09	-0.2	-0.23	-0.07	-0.09	-0.1	0.14	0.13	-0.16	0.01	-0.04	-0.14	0.15	0.02	0.13	-0.06	0.03	-0.09	-0.19	-0.06	-0.1	0.05
Q99MR9	Ppp1r3a	Protein phosphatase 1 regulatory subunit 3A OS=Mus musculus OX=10090 GN=Ppp1r3a PE=1 SV=2	-4.46e+18	0	456.83	64	55	946	55	55	1	3516	946	55	0	>sp|Q99MR9|PPR3A_MOUSE Protein phosphatase 1 regulatory subunit 3A OS=Mus musculus OX=10090 GN=Ppp1r3a PE=1 SV=2	0.11	0.04	0.1	0.05	0.06	0.11	0.07	0.08	-0.01	0.06	0.18	-0.01	0	-0.07	0.03	-0.01	0.01	0.19	0.14	-0.2	-0.02	-0.04	-0.04	0.1	0.04	-0.02	-0.12	-0.01	-0.08	-0.17	0.04	-0.04	0.11
A0A0G2JFH2	Map4	Isoform of P27546, Microtubule-associated protein (Fragment) OS=Mus musculus OX=10090 GN=Map4 PE=1 SV=1	-7.99e+18	0	456.714	62	71	859	51	51	1	2792.67	859	71	22	>tr|A0A0G2JFH2|A0A0G2JFH2_MOUSE Isoform of P27546, Microtubule-associated protein (Fragment) OS=Mus musculus OX=10090 GN=Map4 PE=1 SV=1	-0.04	-0.03	0.13	0.13	-0.08	0.04	0.07	0.15	0	0.07	-0.13	-0.11	-0.12	-0.12	-0.05	-0.01	0.02	-0.16	-0.22	-0.08	-0.02	-0.06	-0.09	-0.2	-0.03	0.31	0.26	-0.04	0.04	-0.05	0.06	0.02	0.16
Q3V1D3	Ampd1	AMP deaminase 1 OS=Mus musculus OX=10090 GN=Ampd1 PE=1 SV=2	4.52e+18	0	451.206	57	39	1789	0	29	1	6216.6	1789	39	13	>sp|Q3V1D3|AMPD1_MOUSE AMP deaminase 1 OS=Mus musculus OX=10090 GN=Ampd1 PE=1 SV=2	0.26	0.11	0.08	-0.03	-0.09	0.13	-0.03	0.13	-0.16	-0.04	0.01	-0.03	-0.19	-0.28	-0.45	-0.07	-0.01	0.38	0.18	-0.73	-0.48	-0.13	-0.25	-0.11	-0.18	0.2	-0.35	0.02	-0.22	-0.38	0.12	-0.07	0.21
A2ABU4	Myom3	Myomesin-3 OS=Mus musculus OX=10090 GN=Myom3 PE=1 SV=1	-9e+18	0	446.821	55	61	995	60	60	1	3775.58	995	61	1	>sp|A2ABU4|MYOM3_MOUSE Myomesin-3 OS=Mus musculus OX=10090 GN=Myom3 PE=1 SV=1	-0.97	-0.58	-0.16	0.03	0.19	-0.51	0.16	0.01	0.23	-0.07	0.07	-0.36	-0.23	-0.02	0.52	-0.14	-0.26	-1.18	-0.43	0.16	0.33	0.06	0.37	-0.32	0.52	0.09	0.03	0.4	-0.04	-0.05	-0.29	0.01	0.12
A2AI87	Phka1	Isoform of P18826, Phosphorylase b kinase regulatory subunit OS=Mus musculus OX=10090 GN=Phka1 PE=1 SV=1	-8.86e+18	0	446.594	50	44	1169	0	42	1	4328.39	1169	44	2	>tr|A2AI87|A2AI87_MOUSE Isoform of P18826, Phosphorylase b kinase regulatory subunit OS=Mus musculus OX=10090 GN=Phka1 PE=1 SV=1	0.24	0.14	0.13	0.04	0.14	0.16	0.21	-0.09	0.17	0.34	0.29	0.01	0.08	-0.08	-0.06	0.01	0.05	0.11	0.07	-0.21	-0.04	0.01	-0.14	0.09	0.03	0.06	-0.18	0.09	0.01	-0.22	0.17	-0.01	0.2
Q99KI0	Aco2	Aconitate hydratase, mitochondrial OS=Mus musculus OX=10090 GN=Aco2 PE=1 SV=1	5.03e+18	0	446.105	65	40	2769	32	40	1	9314.36	2769	40	0	>sp|Q99KI0|ACON_MOUSE Aconitate hydratase, mitochondrial OS=Mus musculus OX=10090 GN=Aco2 PE=1 SV=1	-0.1	-0.05	-0.15	-0.1	0.08	-0.06	0.18	0.05	0.29	0.15	0.15	-0.13	0.15	0.19	0.42	0.19	0.07	-0.11	0.2	-0.09	0.06	0.07	0.08	0.04	0.25	0.06	0.01	0.25	0	0.04	0.04	0.17	0.07
Q80XB4	Nrap	Nebulin-related-anchoring protein OS=Mus musculus OX=10090 GN=Nrap PE=1 SV=3	-3.89e+18	0	437.923	53	76	885	0	76	1	2962.23	885	76	0	>sp|Q80XB4|NRAP_MOUSE Nebulin-related-anchoring protein OS=Mus musculus OX=10090 GN=Nrap PE=1 SV=3	-0.12	-0.07	0.22	0.15	-0.04	-0.14	0.32	-0.08	-0.01	0.16	0.09	-0.09	0.05	-0.07	0.09	-0.13	0.14	-0.09	-0.17	0.07	0.03	-0.17	0.14	0.07	0.25	0.23	0.83	0.07	0.22	-0.16	0.1	0.05	0.3
P05977	Myl1	Myosin light chain 1/3, skeletal muscle isoform OS=Mus musculus OX=10090 GN=Myl1 PE=1 SV=2	2.08e+18	0	436.354	96	30	15720	0	25	1	49692.1	15720	30	6	>sp|P05977|MYL1_MOUSE Myosin light chain 1/3, skeletal muscle isoform OS=Mus musculus OX=10090 GN=Myl1 PE=1 SV=2	0.16	0.19	0.12	0.03	0.04	0.11	0.02	0.04	-0.06	0.02	0.13	-0.03	0.01	-0.1	0.02	0.02	0	0.13	0.13	-0.21	-0.04	-0.02	-0.02	0	0	-0.01	-0.59	0.05	-0.11	-0.16	0	-0.01	-0.1
Q70IV5-2	Synm	Isoform of Q70IV5, Isoform 2 of Synemin OS=Mus musculus OX=10090 GN=Synm	-3.61e+18	0	434.433	58	59	1198	0	59	1	4462.2	1198	59	0	>sp|Q70IV5-2|SYNEM_MOUSE Isoform of Q70IV5, Isoform 2 of Synemin OS=Mus musculus OX=10090 GN=Synm	-0.03	-0.01	0.09	0.02	-0.11	-0.19	-0.11	0.12	-0.09	0	-0.02	-0.26	-0.16	-0.17	-0.22	-0.11	-0.01	0.02	-0.06	-0.04	0.15	-0.07	-0.11	-0.26	-0.2	0.03	0.44	-0.05	0	-0.06	0.05	-0.03	0.18
P09411	Pgk1	Phosphoglycerate kinase 1 OS=Mus musculus OX=10090 GN=Pgk1 PE=1 SV=4	-7.78e+18	0	429.692	80	33	3262	13	33	1	11390.3	3262	33	0	>sp|P09411|PGK1_MOUSE Phosphoglycerate kinase 1 OS=Mus musculus OX=10090 GN=Pgk1 PE=1 SV=4	0.14	0.11	0.1	0.07	0.07	0.13	0.07	0.03	0.03	0.16	0.09	-0.03	0.06	-0.04	0.1	-0.01	-0.08	0.17	0.17	-0.18	-0.03	-0.07	-0.09	0.01	-0.06	0.12	-0.35	0.04	-0.13	-0.15	0.02	-0.03	-0.09
P01027	C3	Complement C3 OS=Mus musculus OX=10090 GN=C3 PE=1 SV=3	-2.58e+18	0	426.188	50	70	1032	52	70	1	3544.31	1032	70	0	>sp|P01027|CO3_MOUSE Complement C3 OS=Mus musculus OX=10090 GN=C3 PE=1 SV=3	-0.16	-0.09	0.13	0.04	-0.32	-0.25	-0.37	-0.41	-0.12	-0.26	-0.53	-0.18	-0.61	-0.44	-0.61	0.11	-0.11	0.12	-0.17	0.62	0.08	0.11	0.05	-0.55	-0.55	-0.13	0.09	-0.48	-0.13	0.03	-0.13	-0.11	-0.18
A0A1L1SV25	Actn4	Isoform of P57780, Alpha-actinin-4 OS=Mus musculus OX=10090 GN=Actn4 PE=1 SV=1	-3.99e+18	0	423.192	58	49	1481	0	31	1	4926.15	1481	49	5	>tr|A0A1L1SV25|A0A1L1SV25_MOUSE Isoform of P57780, Alpha-actinin-4 OS=Mus musculus OX=10090 GN=Actn4 PE=1 SV=1	-0.29	-0.14	-0.18	0.06	-0.2	0.04	-0.05	-0.26	0.19	-0.01	-0.12	0.35	0.07	0.3	0.16	0.02	0.04	0.02	-0.05	0.5	-0.1	0.05	0.05	0.31	-0.03	0.1	0.09	-0.07	-0.08	0.2	-0.16	-0.03	-0.26
P58252	Eef2	Elongation factor 2 OS=Mus musculus OX=10090 GN=Eef2 PE=1 SV=2	-7.16e+18	0	420.871	60	47	1916	46	46	1	7104.4	1916	47	1	>sp|P58252|EF2_MOUSE Elongation factor 2 OS=Mus musculus OX=10090 GN=Eef2 PE=1 SV=2	0.16	0.11	-0.02	-0.03	0.06	0.04	0.1	0.01	-0.03	0.07	0.18	0.09	0.01	-0.13	-0.1	0.12	0.18	0.15	0.06	-0.17	-0.01	-0.01	-0.02	-0.02	0.13	0.16	-0.08	-0.03	0.02	-0.08	0.14	0	-0.01
P60710	Actb	Actin, cytoplasmic 1 OS=Mus musculus OX=10090 GN=Actb PE=1 SV=1	-1.74e+17	0	419.095	75	30	16616	0	4	1	46391.1	16616	30	8	>sp|P60710|ACTB_MOUSE Actin, cytoplasmic 1 OS=Mus musculus OX=10090 GN=Actb PE=1 SV=1	-0.08	-0.09	-0.1	-0.09	-0.21	0.04	-0.1	-0.19	0.01	-0.09	-0.06	0.41	0.07	0.39	0.02	0.04	0.29	-0.08	-0.14	0.24	-0.09	0.03	0.03	0.48	0.02	-0.16	0.24	-0.05	-0.01	0.49	-0.03	0.19	-0.01
Q02053	Uba1	Ubiquitin-like modifier-activating enzyme 1 OS=Mus musculus OX=10090 GN=Uba1 PE=1 SV=1	7.44e+18	0	415.875	52	44	1145	33	44	1	4576.1	1145	44	0	>sp|Q02053|UBA1_MOUSE Ubiquitin-like modifier-activating enzyme 1 OS=Mus musculus OX=10090 GN=Uba1 PE=1 SV=1	0.06	0.05	-0.02	-0.02	0.01	-0.02	0.14	0	0.09	0.21	0.07	0.01	0.04	-0.1	-0.07	-0.02	-0.02	0.07	0.1	-0.08	0.03	0	-0.09	0.01	0.02	0.04	-0.17	0	-0.03	-0.07	0.07	0	0
E9PYJ9	Ldb3	Isoform of Q9JKS4, LIM domain-binding protein 3 OS=Mus musculus OX=10090 GN=Ldb3 PE=1 SV=1	2.07e+18	0	414.574	53	26	2686	1	1	1	11810.9	2686	26	34	>tr|E9PYJ9|E9PYJ9_MOUSE Isoform of Q9JKS4, LIM domain-binding protein 3 OS=Mus musculus OX=10090 GN=Ldb3 PE=1 SV=1	0.12	0.12	0.05	0	0.04	-0.04	0.08	0.05	-0.03	0.04	0.14	-0.04	-0.1	-0.11	-0.09	-0.06	0.02	0.09	0.05	-0.17	0.04	-0.09	-0.07	-0.16	0.09	-0.01	-0.08	0.05	-0.07	-0.14	0.03	0	0.01
P63017	Hspa8	Heat shock cognate 71 kDa protein OS=Mus musculus OX=10090 GN=Hspa8 PE=1 SV=1	2.6e+18	0	406.593	68	36	2252	1	24	1	8179.53	2252	36	12	>sp|P63017|HSP7C_MOUSE Heat shock cognate 71 kDa protein OS=Mus musculus OX=10090 GN=Hspa8 PE=1 SV=1	0.14	0.13	0.05	0.07	-0.01	0.08	0.1	0.06	0.07	0.05	0.1	0.03	-0.03	-0.1	-0.04	0.08	-0.04	0.15	0.08	-0.09	0.08	-0.03	-0.07	0.12	0.05	0.08	-0.19	-0.03	-0.07	0.02	0.01	0.04	0
Q8BH59	Slc25a12	Calcium-binding mitochondrial carrier protein Aralar1 OS=Mus musculus OX=10090 GN=Slc25a12 PE=1 SV=1	-9.12e+18	0	406.531	71	34	1381	27	30	1	5309.47	1381	34	4	>sp|Q8BH59|CMC1_MOUSE Calcium-binding mitochondrial carrier protein Aralar1 OS=Mus musculus OX=10090 GN=Slc25a12 PE=1 SV=1	0.09	0.07	-0.07	-0.17	0.07	-0.17	0.18	0.16	0.23	0.32	0.04	-0.29	-0.15	-0.23	-0.06	0.1	0.19	-0.12	0.07	-0.3	0.05	0.02	-0.05	-0.07	0.17	0.22	0.07	0.3	0.11	-0.15	0.11	-0.05	0.02
Q4U4S6-2	Xirp2	Isoform of Q4U4S6, Isoform 2 of Xin actin-binding repeat-containing protein 2 OS=Mus musculus OX=10090 GN=Xirp2	-2.86e+18	0	399.965	30	76	379	2	75	1	1305.26	379	76	1	>sp|Q4U4S6-2|XIRP2_MOUSE Isoform of Q4U4S6, Isoform 2 of Xin actin-binding repeat-containing protein 2 OS=Mus musculus OX=10090 GN=Xirp2	0.02	0.03	0.03	-0.07	-0.08	-0.22	-0.09	-0.06	-0.07	-0.07	0.02	-0.2	-0.13	0.02	-0.17	-0.1	-0.08	-0.12	-0.3	-0.1	0.16	-0.01	0.22	-0.35	0.17	0.05	0.48	-0.06	0.04	-0.24	0.02	-0.08	0.09
P63038	Hspd1	60 kDa heat shock protein, mitochondrial OS=Mus musculus OX=10090 GN=Hspd1 PE=1 SV=1	6.53e+18	0	396.662	77	33	1616	9	33	1	6689.7	1616	33	0	>sp|P63038|CH60_MOUSE 60 kDa heat shock protein, mitochondrial OS=Mus musculus OX=10090 GN=Hspd1 PE=1 SV=1	-0.12	-0.07	0.02	0.14	0.07	0.15	0.17	0.23	0.29	0.21	0.03	-0.05	0.11	0.14	0.42	0.22	0.05	0.05	0.2	0.06	0.16	0.18	0.2	0.21	0.1	0.21	0.08	0.1	0.13	0.2	0.1	0.23	0.17
F8WIA1	Clip1	Isoform of Q922J3, CAP-Gly domain-containing linker protein 1 OS=Mus musculus OX=10090 GN=Clip1 PE=1 SV=1	5.14e+18	0	396.437	51	65	717	0	65	1	2391.22	717	65	0	>tr|F8WIA1|F8WIA1_MOUSE Isoform of Q922J3, CAP-Gly domain-containing linker protein 1 OS=Mus musculus OX=10090 GN=Clip1 PE=1 SV=1	0.17	0.08	0.14	0.04	-0.06	0.07	0.1	0.02	-0.14	-0.03	0.14	-0.05	0.02	-0.12	-0.05	0.1	0.13	-0.02	-0.16	-0.04	0.14	-0.15	-0.09	0.04	0.11	0.1	-0.24	0.09	0.03	-0.07	0.05	-0.01	0.1
S4R2S8	Ank3	Isoform of G5E8K5, Ankyrin-3 OS=Mus musculus OX=10090 GN=Ank3 PE=1 SV=1	-1.9e+18	0	394.996	43	57	515	0	40	1	1870.43	515	57	19	>tr|S4R2S8|S4R2S8_MOUSE Isoform of G5E8K5, Ankyrin-3 OS=Mus musculus OX=10090 GN=Ank3 PE=1 SV=1	0.05	0.04	0.14	0.1	0.05	0.15	0.16	-0.03	0.12	0.21	0.12	0.09	0	0.03	0.08	-0.19	-0.04	0.14	0.02	-0.03	0.14	-0.05	0.01	0.11	-0.03	-0.01	0.17	0.04	0	-0.16	0.03	-0.11	0.09
P11499	Hsp90ab1	Heat shock protein HSP 90-beta OS=Mus musculus OX=10090 GN=Hsp90ab1 PE=1 SV=3	-6.83e+17	0	392.035	62	41	1467	11	27	1	5508.63	1467	41	15	>sp|P11499|HS90B_MOUSE Heat shock protein HSP 90-beta OS=Mus musculus OX=10090 GN=Hsp90ab1 PE=1 SV=3	-0.01	0	-0.1	-0.02	-0.06	-0.05	-0.07	0.02	-0.07	-0.05	-0.02	-0.06	-0.14	-0.24	-0.22	0.06	0.05	0.19	0.12	-0.07	0.01	0.09	0.05	0.08	0.04	0.12	0	-0.2	-0.08	-0.03	0	0.01	-0.03
Q80X90	Flnb	Filamin-B OS=Mus musculus OX=10090 GN=Flnb PE=1 SV=3	-2.74e+18	0	388.431	36	67	660	55	55	1	2184.26	660	67	0	>sp|Q80X90|FLNB_MOUSE Filamin-B OS=Mus musculus OX=10090 GN=Flnb PE=1 SV=3	-0.23	-0.12	-0.1	-0.06	-0.09	0.04	-0.01	-0.16	0.04	-0.09	-0.16	0.22	-0.02	0.15	0	0	-0.05	-0.15	0.1	0.18	-0.16	-0.1	0.01	0.03	-0.07	-0.14	-0.05	-0.14	-0.05	0.09	-0.12	-0.07	-0.07
Q91ZJ5	Ugp2	UTP--glucose-1-phosphate uridylyltransferase OS=Mus musculus OX=10090 GN=Ugp2 PE=1 SV=3	6.55e+18	0	387.963	73	31	1738	3	31	1	6798.96	1738	31	0	>sp|Q91ZJ5|UGPA_MOUSE UTP--glucose-1-phosphate uridylyltransferase OS=Mus musculus OX=10090 GN=Ugp2 PE=1 SV=3	-0.01	-0.04	0.21	0.08	0.22	0.25	0.23	0.01	0.29	0.31	0.31	0.08	0.13	0.05	0.11	0.23	0.14	-0.16	-0.02	-0.2	-0.01	0.17	0.13	0.07	0.22	0.14	-0.16	0.18	0.25	0.07	0.26	0.22	0.04
Q8BMS1	Hadha	Trifunctional enzyme subunit alpha, mitochondrial OS=Mus musculus OX=10090 GN=Hadha PE=1 SV=1	-3.48e+18	0	387.843	53	32	1822	32	32	1	6485.71	1822	32	0	>sp|Q8BMS1|ECHA_MOUSE Trifunctional enzyme subunit alpha, mitochondrial OS=Mus musculus OX=10090 GN=Hadha PE=1 SV=1	-0.32	-0.17	-0.14	-0.07	0.01	-0.12	0.13	0.21	0.4	0.15	0.03	-0.26	0.28	0.3	0.65	0.22	-0.06	-0.15	0.21	0.1	0.15	-0.02	0.02	0.07	0.15	0.1	-0.15	0.04	0.05	0.12	-0.05	0.19	-0.01
Q64521	Gpd2	Glycerol-3-phosphate dehydrogenase, mitochondrial OS=Mus musculus OX=10090 GN=Gpd2 PE=1 SV=2	-7.5e+18	0	386.873	79	45	1465	2	45	1	4831.85	1465	45	0	>sp|Q64521|GPDM_MOUSE Glycerol-3-phosphate dehydrogenase, mitochondrial OS=Mus musculus OX=10090 GN=Gpd2 PE=1 SV=2	0.3	0.27	0.36	0.28	0.22	0.53	0.26	0.13	0.18	0.26	0.22	0.13	0.38	0.32	0.43	0.5	0.31	0.18	0.04	-0.22	-0.28	0.18	0.01	0.34	0.15	0.34	-0.17	0.07	0.29	0.2	0.46	0.36	0.11
P97807	Fh	Fumarate hydratase, mitochondrial OS=Mus musculus OX=10090 GN=Fh PE=1 SV=3	-2.23e+18	0	385.749	63	22	1442	0	22	1	6008.49	1442	22	0	>sp|P97807|FUMH_MOUSE Fumarate hydratase, mitochondrial OS=Mus musculus OX=10090 GN=Fh PE=1 SV=3	-0.23	-0.09	-0.01	0.03	0.1	-0.02	0.16	0.07	0.36	0.28	-0.01	-0.22	0.01	0.01	0.34	0.17	-0.1	-0.04	0.22	-0.28	-0.15	0.08	0	-0.03	0.05	0.03	-0.15	0.09	0	0.03	-0.01	0.07	0.03
Q9D0F9	Pgm1	Phosphoglucomutase-1 OS=Mus musculus OX=10090 GN=Pgm1 PE=1 SV=4	1.23e+18	0	383.135	70	36	2320	5	5	1	8246.73	2320	36	37	>sp|Q9D0F9|PGM1_MOUSE Phosphoglucomutase-1 OS=Mus musculus OX=10090 GN=Pgm1 PE=1 SV=4	0.24	0.23	0.12	0.03	0.05	0.03	-0.12	0.14	-0.18	0.04	0.09	-0.06	-0.16	-0.2	-0.29	0.05	0.07	0.17	0.14	-0.3	0.08	0.01	-0.11	-0.22	-0.15	0.19	-0.38	0.03	0.05	-0.19	0.18	0.03	0.09
O08532-2	Cacna2d1	Isoform of O08532, Isoform 2B of Voltage-dependent calcium channel subunit alpha-2/delta-1 OS=Mus musculus OX=10090 GN=Cacna2d1	-5.51e+18	0	382.402	51	43	911	0	1	1	3471.74	911	43	47	>sp|O08532-2|CA2D1_MOUSE Isoform of O08532, Isoform 2B of Voltage-dependent calcium channel subunit alpha-2/delta-1 OS=Mus musculus OX=10090 GN=Cacna2d1	0.3	0.24	0.1	0.03	0.01	-0.02	0.11	0.05	0.08	0.19	0.2	-0.04	-0.02	-0.02	-0.12	-0.03	-0.04	0.21	0.26	-0.05	0.13	0	0.02	0.08	0.07	-0.1	0.01	0.01	0.07	-0.14	0.13	0	0.02
P14824	Anxa6	Annexin A6 OS=Mus musculus OX=10090 GN=Anxa6 PE=1 SV=3	-8.44e+18	0	382.399	74	47	1532	2	2	1	5505.88	1532	47	0	>sp|P14824|ANXA6_MOUSE Annexin A6 OS=Mus musculus OX=10090 GN=Anxa6 PE=1 SV=3	-0.04	0.37	0.08	0.25	0.14	0.22	0.01	-0.11	0.04	-0.06	-0.03	-0.09	-0.18	-0.22	0.24	0.02	-0.2	0.21	0.16	-0.22	-0.11	-0.24	-0.47	0.37	0.09	0.72	-0.52	-0.16	-0.05	-0.06	0.02	-0.03	-0.03
P17182	Eno1	Alpha-enolase OS=Mus musculus OX=10090 GN=Eno1 PE=1 SV=3	-7.95e+18	0	377.388	76	24	3344	0	11	1	13630.9	3344	24	11	>sp|P17182|ENOA_MOUSE Alpha-enolase OS=Mus musculus OX=10090 GN=Eno1 PE=1 SV=3	0.14	0.21	0.03	0.11	-0.06	0.11	0.02	-0.1	0.17	0.1	0.11	0.15	0.15	0.3	0.33	0.24	-0.02	0.11	0.08	0	-0.09	0.05	-0.09	0.33	-0.05	-0.12	-0.39	-0.13	-0.05	0.12	0.04	0.18	-0.14
A2CEK3	Pgm2	Phosphoglucomutase-2 OS=Mus musculus OX=10090 GN=Pgm2 PE=1 SV=1	-6.7e+18	0	373.728	65	35	2150	4	4	1	7749.32	2150	35	0	>tr|A2CEK3|A2CEK3_MOUSE Phosphoglucomutase-2 OS=Mus musculus OX=10090 GN=Pgm2 PE=1 SV=1	0.09	-0.05	-0.23	-0.12	0.04	-0.19	-0.1	0.13	-0.13	0.09	-0.34	-0.28	-0.14	-0.65	-0.59	-0.21	0.38	0.31	-0.04	-0.66	-0.01	-0.17	-0.02	-0.58	-0.16	1.86	-0.09	0.07	-0.09	-0.31	-0.01	-0.05	-0.11
Q8K2B3	Sdha	Succinate dehydrogenase [ubiquinone] flavoprotein subunit, mitochondrial OS=Mus musculus OX=10090 GN=Sdha PE=1 SV=1	2.26e+18	0	372.453	62	28	1515	20	28	1	6359.11	1515	28	0	>sp|Q8K2B3|SDHA_MOUSE Succinate dehydrogenase [ubiquinone] flavoprotein subunit, mitochondrial OS=Mus musculus OX=10090 GN=Sdha PE=1 SV=1	-0.21	-0.1	-0.05	0.01	0.1	-0.08	0.07	0.04	0.17	0	-0.05	-0.21	0.03	0.08	0.3	0.14	0.06	-0.17	0.1	0.06	0.11	0.08	0.05	-0.1	0.09	-0.04	0.17	0.16	0.01	-0.01	0.02	0.09	0.12
O08532-3	Cacna2d1	Isoform of O08532, Isoform 2C of Voltage-dependent calcium channel subunit alpha-2/delta-1 OS=Mus musculus OX=10090 GN=Cacna2d1	-7.11e+18	0	370.072	52	43	873	0	1	1	3253.17	873	43	0	>sp|O08532-3|CA2D1_MOUSE Isoform of O08532, Isoform 2C of Voltage-dependent calcium channel subunit alpha-2/delta-1 OS=Mus musculus OX=10090 GN=Cacna2d1	-0.09	NaN	NaN	NaN	NaN	NaN	NaN	0.1	-0.14	NaN	NaN	NaN	NaN	NaN	NaN	NaN	NaN	NaN	NaN	NaN	0	NaN	NaN	NaN	-0.15	NaN	NaN	-0.18	NaN	-0.05	NaN	-0.06	NaN
Q03265	Atp5f1a	ATP synthase subunit alpha, mitochondrial OS=Mus musculus OX=10090 GN=Atp5f1a PE=1 SV=1	-1.5e+18	0	367.207	63	34	3792	0	34	1	15618.1	3792	34	0	>sp|Q03265|ATPA_MOUSE ATP synthase subunit alpha, mitochondrial OS=Mus musculus OX=10090 GN=Atp5f1a PE=1 SV=1	-0.47	-0.37	-0.02	0.04	-0.18	-0.27	0.04	0.12	0.18	0.01	0.09	-0.13	-0.02	0.01	0.34	-0.23	-0.31	-0.16	0.12	-0.03	0.17	0.14	0.11	0.04	0.17	0.25	-0.04	0.18	-0.3	-0.29	-0.36	-0.3	0.12
E9Q035	Gm20425	Predicted gene 20425 OS=Mus musculus OX=10090 GN=Gm20425 PE=4 SV=1	5.14e+18	0	366.57	50	44	1337	0	8	1	4529.73	1337	44	39	>tr|E9Q035|E9Q035_MOUSE Predicted gene 20425 OS=Mus musculus OX=10090 GN=Gm20425 PE=4 SV=1	0.17	0.15	-0.02	-0.08	-0.35	-0.21	-0.17	-0.3	0.02	-0.06	0.15	0.37	-0.19	0.18	0.22	0.13	0.12	0.23	-0.02	0.42	-0.08	0.06	0.28	0.11	-0.03	-0.03	0.51	-0.17	-0.05	0.12	-0.03	-0.01	0.03
F8WIT2	Anxa6	Isoform of P14824, Annexin OS=Mus musculus OX=10090 GN=Anxa6 PE=1 SV=1	-5.02e+18	0	363.927	74	47	1472	2	2	1	5199.69	1472	47	53	>tr|F8WIT2|F8WIT2_MOUSE Isoform of P14824, Annexin OS=Mus musculus OX=10090 GN=Anxa6 PE=1 SV=1	-0.01	0.03	0.34	0.23	0.22	0.21	0.13	-0.03	0.19	0.22	-0.05	-0.05	0.12	0.1	0.14	0	-0.1	0.22	0.25	-0.14	0	-0.11	-0.16	0.26	0.24	0.23	-0.29	-0.04	0.11	0.13	0.19	0.21	0.22
Q7TPR4	Actn1	Alpha-actinin-1 OS=Mus musculus OX=10090 GN=Actn1 PE=1 SV=1	7.08e+18	0	363.448	56	45	1654	1	23	1	5264.46	1654	45	0	>sp|Q7TPR4|ACTN1_MOUSE Alpha-actinin-1 OS=Mus musculus OX=10090 GN=Actn1 PE=1 SV=1	-0.38	-0.47	-0.49	-0.15	-0.24	0.27	0.01	-0.24	0.19	-0.15	0.05	0.34	-0.08	0.28	-0.2	-0.16	0.17	0.2	0.1	0.18	0.14	0.05	0.01	0.22	0	-0.07	0.04	-0.19	-0.09	-0.05	-0.04	-0.09	-0.19
Q61292	Lamb2	Laminin subunit beta-2 OS=Mus musculus OX=10090 GN=Lamb2 PE=1 SV=2	4.6e+18	0	357.965	31	49	801	46	49	1	2845.76	801	49	0	>sp|Q61292|LAMB2_MOUSE Laminin subunit beta-2 OS=Mus musculus OX=10090 GN=Lamb2 PE=1 SV=2	-0.16	-0.08	0.02	0.08	-0.01	-0.21	-0.1	-0.02	-0.01	-0.05	-0.06	-0.03	-0.17	-0.01	0	-0.17	-0.09	-0.07	-0.11	0.14	0.19	0.04	0.11	-0.12	0.04	-0.2	0.22	0.19	0.01	-0.13	-0.1	-0.06	-0.05
E9Q6A6	Col6a6	Isoform of Q8C6K9, Collagen alpha-6(VI) chain OS=Mus musculus OX=10090 GN=Col6a6 PE=1 SV=2	-9.2e+18	0	356.687	30	47	549	0	41	1	2178.04	549	47	6	>tr|E9Q6A6|E9Q6A6_MOUSE Isoform of Q8C6K9, Collagen alpha-6(VI) chain OS=Mus musculus OX=10090 GN=Col6a6 PE=1 SV=2	0.07	0.05	-0.25	-0.31	0.14	0.12	-0.08	-0.04	0.01	0.11	0.18	0.46	0.03	-0.2	0.2	-0.11	-0.04	0.04	-0.12	0.25	-0.04	0.07	0.11	0.35	0.08	-0.12	-0.23	-0.48	-0.07	0.18	0	0.02	-0.06
F8VQJ3	Lamc1	Isoform of P02468, Laminin subunit gamma-1 OS=Mus musculus OX=10090 GN=Lamc1 PE=1 SV=1	4.73e+17	0	356.164	35	48	892	1	48	1	3132.44	892	48	0	>tr|F8VQJ3|F8VQJ3_MOUSE Isoform of P02468, Laminin subunit gamma-1 OS=Mus musculus OX=10090 GN=Lamc1 PE=1 SV=1	0.07	0.11	0.09	0.08	0.06	0.04	-0.03	-0.1	0.07	-0.01	0.08	-0.01	0	-0.01	0.21	0.05	-0.02	0.01	0.16	-0.04	0.02	-0.09	-0.08	0.27	0.25	0.04	-0.04	0.09	-0.09	-0.11	-0.17	-0.04	-0.13
E9Q800	Immt	Isoform of Q8CAQ8, MICOS complex subunit MIC60 OS=Mus musculus OX=10090 GN=Immt PE=1 SV=1	3.21e+18	0	353.762	71	43	1217	0	2	1	4264.11	1217	43	0	>tr|E9Q800|E9Q800_MOUSE Isoform of Q8CAQ8, MICOS complex subunit MIC60 OS=Mus musculus OX=10090 GN=Immt PE=1 SV=1	-0.25	-0.06	-0.08	0.09	0.28	-0.47	-0.05	0.21	0.04	-0.17	0	-0.16	-0.07	-0.04	0.03	-0.01	0.04	-0.11	-0.18	-0.3	0.2	0.03	-0.27	-0.33	0.19	-0.34	-0.11	0.14	-0.1	0.1	0.06	0.16	0.15
Q8BWT1	Acaa2	3-ketoacyl-CoA thiolase, mitochondrial OS=Mus musculus OX=10090 GN=Acaa2 PE=1 SV=3	3.18e+18	0	353.65	80	22	1094	22	22	1	4403.34	1094	22	0	>sp|Q8BWT1|THIM_MOUSE 3-ketoacyl-CoA thiolase, mitochondrial OS=Mus musculus OX=10090 GN=Acaa2 PE=1 SV=3	-0.57	-0.14	-0.16	-0.02	0.14	-0.11	0.1	0.15	0.51	0.03	0.05	-0.24	0.47	0.6	1.03	0.44	0.01	-0.39	0.06	0.25	0.26	-0.01	-0.06	0.11	0.14	0.1	0.05	0.11	0.16	0.34	-0.03	0.33	-0.01
Q9JKS4	Ldb3	LIM domain-binding protein 3 OS=Mus musculus OX=10090 GN=Ldb3 PE=1 SV=1	2.4e+18	0	352.252	42	23	2413	0	1	1	10951.3	2413	23	0	>sp|Q9JKS4|LDB3_MOUSE LIM domain-binding protein 3 OS=Mus musculus OX=10090 GN=Ldb3 PE=1 SV=1	0.08	-0.6	NaN	0.01	-0.14	NaN	NaN	0.1	NaN	NaN	NaN	-0.34	-0.14	NaN	-0.29	-0.2	0.53	-0.18	NaN	NaN	0.17	NaN	0.09	NaN	0	-0.15	NaN	0.06	NaN	-0.17	NaN	-0.09	NaN
Q8CAQ8-2	Immt	Isoform of Q8CAQ8, Isoform 2 of MICOS complex subunit Mic60 OS=Mus musculus OX=10090 GN=Immt	-7.16e+17	0	352.043	68	43	1175	0	2	1	4116.8	1175	43	49	>sp|Q8CAQ8-2|MIC60_MOUSE Isoform of Q8CAQ8, Isoform 2 of MICOS complex subunit Mic60 OS=Mus musculus OX=10090 GN=Immt	-0.15	-0.02	-0.05	0.03	0.14	-0.05	-0.05	0.19	0.11	0	-0.01	-0.23	0.03	0.07	0.33	0.08	0.01	-0.08	0.06	-0.03	0.19	0.08	0.03	-0.06	0.13	0.13	0.07	0.18	0.08	0.11	0.04	0.15	0.13
Q6P5E4	Uggt1	UDP-glucose:glycoprotein glucosyltransferase 1 OS=Mus musculus OX=10090 GN=Uggt1 PE=1 SV=4	-2.34e+18	0	349.37	46	51	493	29	51	1	1746.72	493	51	0	>sp|Q6P5E4|UGGG1_MOUSE UDP-glucose:glycoprotein glucosyltransferase 1 OS=Mus musculus OX=10090 GN=Uggt1 PE=1 SV=4	0.11	0.18	0.02	0.01	0.14	0.03	0.24	0.34	0.31	0.4	0.05	0.08	-0.07	0.08	-0.05	-0.04	0	0.25	0.21	0.27	0.43	-0.04	-0.05	0.03	-0.05	0.08	-0.09	-0.07	-0.1	-0.06	0.04	-0.04	0.32
P06745	Gpi	Glucose-6-phosphate isomerase OS=Mus musculus OX=10090 GN=Gpi PE=1 SV=4	-3.24e+18	0	347.627	62	31	2628	12	31	1	8364.51	2628	31	0	>sp|P06745|G6PI_MOUSE Glucose-6-phosphate isomerase OS=Mus musculus OX=10090 GN=Gpi PE=1 SV=4	0.05	0	0.14	0.11	-0.02	-0.03	-0.04	0.09	-0.05	0.06	0.14	0	0.13	0.03	0.04	-0.06	-0.03	0.15	0.12	-0.22	-0.01	-0.08	-0.15	0	-0.04	0.05	-0.3	0.12	-0.1	-0.18	0.01	-0.03	-0.07
O88492	Plin4	Perilipin-4 OS=Mus musculus OX=10090 GN=Plin4 PE=1 SV=2	7.52e+18	0	346.631	72	39	970	3	39	1	2921.46	970	39	0	>sp|O88492|PLIN4_MOUSE Perilipin-4 OS=Mus musculus OX=10090 GN=Plin4 PE=1 SV=2	0.27	0.25	0.08	0.16	0.18	0.13	0.15	-0.05	0.22	0.16	0.21	0.05	0.13	0.08	0.37	0.08	-0.23	-0.07	0.01	0.25	0.15	0.07	-0.08	0.28	0.25	-0.01	0.11	0.15	-0.01	0.1	-0.11	0	-0.06
P27546-2	Map4	Isoform of P27546, Isoform 2 of Microtubule-associated protein 4 OS=Mus musculus OX=10090 GN=Map4	-7.43e+18	0	345.99	52	45	665	0	25	1	2241.45	665	45	0	>sp|P27546-2|MAP4_MOUSE Isoform of P27546, Isoform 2 of Microtubule-associated protein 4 OS=Mus musculus OX=10090 GN=Map4	0.04	0.01	0.18	0.12	-0.11	0.04	0.01	0.12	0.14	-0.07	-0.06	-0.03	-0.12	-0.09	-0.02	0.19	-0.05	0.02	-0.06	-0.14	-0.02	-0.12	-0.16	-0.02	0.04	0.33	0.13	-0.05	0.02	-0.03	0.01	0	0.2
E9QN70	Lamb1	Isoform of P02469, Laminin subunit beta-1 OS=Mus musculus OX=10090 GN=Lamb1 PE=1 SV=1	-3.6e+18	0	341.899	30	50	876	0	50	1	3104.31	876	50	0	>tr|E9QN70|E9QN70_MOUSE Isoform of P02469, Laminin subunit beta-1 OS=Mus musculus OX=10090 GN=Lamb1 PE=1 SV=1	0.17	0.2	0.06	0.07	0.13	0.14	0.09	-0.09	0.14	0.08	0.13	0.03	0.08	0.01	0.3	0.12	-0.02	0.1	0.26	-0.05	-0.01	-0.16	-0.17	0.42	0.29	0.17	-0.19	0.11	-0.03	-0.04	-0.11	-0.03	-0.12
Q3U2G2	Hspa4	Isoform of Q61316, Heat shock 70 kDa protein 4 OS=Mus musculus OX=10090 GN=Hspa4 PE=1 SV=1	-3.29e+18	0	341.746	69	46	751	2	43	1	2596.67	751	46	4	>tr|Q3U2G2|Q3U2G2_MOUSE Isoform of Q61316, Heat shock 70 kDa protein 4 OS=Mus musculus OX=10090 GN=Hspa4 PE=1 SV=1	-0.03	0	0.03	0.03	-0.05	0.1	0.13	-0.02	0.06	0.01	0.05	0.08	-0.1	-0.07	0.04	0.03	0.07	0.03	0.02	-0.08	-0.04	-0.09	-0.08	0.09	-0.01	0.09	-0.15	-0.08	-0.11	0.1	-0.07	0.04	0.03
Q61838	Pzp	Pregnancy zone protein OS=Mus musculus OX=10090 GN=Pzp PE=1 SV=3	2.97e+18	0	340.833	39	44	802	38	44	1	2779.14	802	44	0	>sp|Q61838|PZP_MOUSE Pregnancy zone protein OS=Mus musculus OX=10090 GN=Pzp PE=1 SV=3	-0.4	-0.06	-0.12	-0.11	-0.5	-0.36	-0.12	-0.03	0.1	-0.06	-0.37	-0.11	-0.34	0.04	-0.03	0.04	0.01	0.33	-0.25	0.37	-0.5	-0.03	0.15	-0.21	-0.56	-0.3	-0.03	-0.31	-0.23	0.17	-0.18	0.05	-0.32
P97457	Mylpf	Myosin regulatory light chain 2, skeletal muscle isoform OS=Mus musculus OX=10090 GN=Mylpf PE=1 SV=3	-5.25e+18	0	338.941	93	27	9268	0	18	1	28574.9	9268	27	14	>sp|P97457|MLRS_MOUSE Myosin regulatory light chain 2, skeletal muscle isoform OS=Mus musculus OX=10090 GN=Mylpf PE=1 SV=3	0.28	0.35	0.17	0.1	0.11	0.26	-0.01	0.05	-0.06	0.03	0.15	0.01	-0.01	-0.06	0.07	0.17	0.02	0.25	0.23	-0.19	-0.03	0.02	-0.08	0.19	0.03	0.25	-0.5	0.03	-0.13	-0.12	-0.09	0.01	-0.05
P38647	Hspa9	Stress-70 protein, mitochondrial OS=Mus musculus OX=10090 GN=Hspa9 PE=1 SV=3	4.72e+18	0	335.625	56	32	813	32	32	1	2953.02	813	32	0	>sp|P38647|GRP75_MOUSE Stress-70 protein, mitochondrial OS=Mus musculus OX=10090 GN=Hspa9 PE=1 SV=3	-0.29	-0.19	-0.09	0.06	0.18	0.01	0.1	0.17	0.34	0.13	-0.06	-0.26	0.17	0.19	0.47	0.21	-0.02	-0.2	0.1	0.24	0.26	0.19	0.14	0.08	0.1	0.01	0.06	0.11	0.15	0.2	0.07	0.2	0.15
P10493	Nid1	Nidogen-1 OS=Mus musculus OX=10090 GN=Nid1 PE=1 SV=2	7.42e+18	0	334.924	45	39	825	38	38	1	2967.8	825	39	1	>sp|P10493|NID1_MOUSE Nidogen-1 OS=Mus musculus OX=10090 GN=Nid1 PE=1 SV=2	-0.01	0.08	-0.02	0.03	0.07	-0.01	0.05	-0.03	0.07	0.12	0.03	0.01	0.05	0.12	0.12	-0.04	-0.05	0.02	0.06	0.01	0.16	0.01	0.23	0.14	0.24	-0.06	0.23	0.22	0	-0.1	-0.02	0	0.01
S4R1P5	Dst	Isoform of Q91ZU6, Dystonin OS=Mus musculus OX=10090 GN=Dst PE=1 SV=1	8.85e+18	0	334.117	13	67	321	0	64	1	1061.67	321	67	3	>tr|S4R1P5|S4R1P5_MOUSE Isoform of Q91ZU6, Dystonin OS=Mus musculus OX=10090 GN=Dst PE=1 SV=1	0.01	-0.09	0.1	-0.04	0.06	-0.1	-0.04	0.04	-0.22	0.01	-0.02	-0.09	-0.19	-0.13	-0.29	-0.1	-0.21	0.12	0.03	-0.1	0.09	0.01	0.05	-0.07	0.02	0.03	-0.15	-0.08	-0.02	-0.17	0.05	-0.08	0.01
Q921I1	Tf	Serotransferrin OS=Mus musculus OX=10090 GN=Tf PE=1 SV=1	1.08e+18	0	330.65	60	38	1284	1	2	1	4366.91	1284	38	0	>sp|Q921I1|TRFE_MOUSE Serotransferrin OS=Mus musculus OX=10090 GN=Tf PE=1 SV=1	0.19	0.16	-0.3	-0.35	-0.59	-0.35	-0.21	-0.59	-0.26	-0.44	0.34	0.37	-0.2	0.47	0.16	-0.1	0.61	0.25	0.03	0.21	-0.37	-0.36	0.2	-0.38	0.11	-0.31	0.75	-0.3	-0.29	-0.05	-0.09	0.05	-0.06
Q8VDN2	Atp1a1	Sodium/potassium-transporting ATPase subunit alpha-1 OS=Mus musculus OX=10090 GN=Atp1a1 PE=1 SV=1	-6.5e+18	0	330.185	44	38	980	20	22	1	3553.83	980	38	0	>sp|Q8VDN2|AT1A1_MOUSE Sodium/potassium-transporting ATPase subunit alpha-1 OS=Mus musculus OX=10090 GN=Atp1a1 PE=1 SV=1	-0.1	-0.21	0.03	0	-0.4	-0.35	-0.07	0.08	0.13	0.06	0	0.03	-0.38	-0.32	-0.48	-0.24	-0.04	-0.15	0	-0.11	-0.06	0.08	0.25	-0.39	-0.28	-0.1	0.39	-0.08	0.1	-0.07	-0.03	0.01	0.01
O08528	Hk2	Hexokinase-2 OS=Mus musculus OX=10090 GN=Hk2 PE=1 SV=1	-3.66e+18	0	329.996	53	44	871	1	39	1	2877.22	871	44	5	>sp|O08528|HXK2_MOUSE Hexokinase-2 OS=Mus musculus OX=10090 GN=Hk2 PE=1 SV=1	-0.01	-0.01	0.07	0.07	0.32	0.05	0.22	0.02	0.2	0.2	0.15	-0.14	0.08	-0.06	0.11	0.13	0.09	-0.25	-0.08	0.02	0.21	-0.04	-0.14	-0.09	0.24	0.34	0.07	0.2	0.21	0.04	0.13	0.16	0.23
Q6PDI5	Ecpas	Proteasome adapter and scaffold protein ECM29 OS=Mus musculus OX=10090 GN=Ecpas PE=1 SV=3	2.17e+18	0	329.73	35	51	547	0	51	1	2026.36	547	51	0	>sp|Q6PDI5|ECM29_MOUSE Proteasome adapter and scaffold protein ECM29 OS=Mus musculus OX=10090 GN=Ecpas PE=1 SV=3	0.08	-0.07	0.07	0.06	-0.06	-0.01	-0.04	-0.03	-0.19	-0.08	0.07	-0.11	-0.07	-0.27	-0.26	-0.06	-0.13	0.15	0.01	-0.15	0.11	-0.06	-0.15	-0.16	-0.01	0.21	-0.11	-0.02	-0.06	-0.2	0.01	-0.05	0.01
P28665	Mug1	Murinoglobulin-1 OS=Mus musculus OX=10090 GN=Mug1 PE=1 SV=3	-9.21e+17	0	327.472	40	44	603	21	30	1	1977.09	603	44	16	>sp|P28665|MUG1_MOUSE Murinoglobulin-1 OS=Mus musculus OX=10090 GN=Mug1 PE=1 SV=3	0.27	0.16	0.08	-0.17	-0.08	-0.26	-0.12	-0.46	-0.34	-0.61	-0.35	0.02	-0.29	-0.26	-0.11	-0.04	0.07	0.61	0.16	0.57	-0.02	-0.4	-0.54	-0.47	-0.64	-0.21	0.03	-0.19	-0.26	0.06	-0.09	-0.31	-0.25
Q6ZQ73	Cand2	Cullin-associated NEDD8-dissociated protein 2 OS=Mus musculus OX=10090 GN=Cand2 PE=1 SV=2	-6.87e+18	0	325.212	43	41	743	40	40	1	2615.78	743	41	1	>sp|Q6ZQ73|CAND2_MOUSE Cullin-associated NEDD8-dissociated protein 2 OS=Mus musculus OX=10090 GN=Cand2 PE=1 SV=2	0.14	0.02	0.08	0.06	0.03	-0.03	0.08	0.12	-0.02	0.09	0.05	-0.15	-0.12	-0.14	-0.28	-0.1	-0.01	0.15	0.19	-0.18	0.07	0.16	0.11	-0.2	-0.06	-0.09	-0.09	0.02	-0.02	-0.21	0.12	-0.06	0.14
Q91VD9	Ndufs1	NADH-ubiquinone oxidoreductase 75 kDa subunit, mitochondrial OS=Mus musculus OX=10090 GN=Ndufs1 PE=1 SV=2	-3.07e+18	0	324.652	66	36	1201	25	36	1	4297.01	1201	36	0	>sp|Q91VD9|NDUS1_MOUSE NADH-ubiquinone oxidoreductase 75 kDa subunit, mitochondrial OS=Mus musculus OX=10090 GN=Ndufs1 PE=1 SV=2	-0.49	-0.38	-0.01	0.09	0.28	0.02	0.2	0.22	0.34	0.24	0.03	-0.23	0.09	0.06	0.33	0.05	-0.03	-0.18	0.07	-0.02	0.13	0.03	-0.04	-0.1	0.1	0.09	0.01	0.09	0.21	0.35	0.16	0.38	0.12
A0A087WQQ5	Ktn1	Isoform of Q61595, Kinectin OS=Mus musculus OX=10090 GN=Ktn1 PE=1 SV=1	6.24e+18	0	324.434	52	55	554	0	54	1	2143.34	554	55	1	>tr|A0A087WQQ5|A0A087WQQ5_MOUSE Isoform of Q61595, Kinectin OS=Mus musculus OX=10090 GN=Ktn1 PE=1 SV=1	0.01	0.01	0.21	0.2	0.02	-0.11	0.08	0.14	0.14	0.17	0.1	0.02	-0.12	-0.25	-0.11	0.19	0.13	0.13	0.07	-0.11	0.01	-0.23	-0.21	0.04	-0.05	0.26	0.01	-0.11	-0.01	-0.04	0	-0.1	0.1
O55103	Prx	Periaxin OS=Mus musculus OX=10090 GN=Prx PE=1 SV=1	-4.67e+17	0	323.243	48	42	573	1	1	1	1906.96	573	42	45	>sp|O55103|PRAX_MOUSE Periaxin OS=Mus musculus OX=10090 GN=Prx PE=1 SV=1	0.52	-1.54	0.36	-0.29	-0.55	-0.21	-0.43	-0.23	0.31	-0.35	0.05	-0.05	-0.51	0.05	-0.23	-0.52	-0.74	0.09	1.5	-0.75	-0.1	-0.23	0.15	-0.48	-0.19	-0.12	-0.95	-0.29	-0.06	-0.68	-0.99	-0.86	-0.35
E9Q8T1	Tacc2	Isoform of Q9JJG0, Transforming acidic coiled-coil-containing protein 2 OS=Mus musculus OX=10090 GN=Tacc2 PE=1 SV=1	-5.05e+18	0	322.738	29	50	322	0	16	1	1147.7	322	50	33	>tr|E9Q8T1|E9Q8T1_MOUSE Isoform of Q9JJG0, Transforming acidic coiled-coil-containing protein 2 OS=Mus musculus OX=10090 GN=Tacc2 PE=1 SV=1	-0.3	-0.28	0.11	0.02	-0.23	-0.34	-0.07	-0.01	-0.19	-0.19	0.16	0.01	0.37	-0.05	0.06	-0.19	-0.26	0.09	-0.01	0.34	0.37	-0.04	-0.04	0.32	0.41	-0.37	-0.31	-0.24	-0.23	-0.31	-0.27	-0.3	0
P50544	Acadvl	Very long-chain specific acyl-CoA dehydrogenase, mitochondrial OS=Mus musculus OX=10090 GN=Acadvl PE=1 SV=3	-2.2e+18	0	322.583	71	35	1330	1	35	1	5191.69	1330	35	0	>sp|P50544|ACADV_MOUSE Very long-chain specific acyl-CoA dehydrogenase, mitochondrial OS=Mus musculus OX=10090 GN=Acadvl PE=1 SV=3	-0.28	-0.1	-0.11	-0.04	0.09	-0.12	-0.03	0.18	0.3	0.01	-0.01	-0.26	0.24	0.03	0.42	0.32	0.01	-0.18	0.19	-0.13	0.18	0.03	-0.05	0	0.25	0.21	-0.11	0.2	-0.02	0.12	-0.14	0.16	0.09
Q6PB66	Lrpprc	Leucine-rich PPR motif-containing protein, mitochondrial OS=Mus musculus OX=10090 GN=Lrpprc PE=1 SV=2	8.64e+18	0	320.568	47	54	757	51	54	1	2769.93	757	54	0	>sp|Q6PB66|LPPRC_MOUSE Leucine-rich PPR motif-containing protein, mitochondrial OS=Mus musculus OX=10090 GN=Lrpprc PE=1 SV=2	-0.13	-0.17	-0.06	0	0.21	-0.04	0.01	0.08	0.08	0.06	-0.04	-0.34	-0.04	-0.23	-0.16	0.17	0.06	-0.04	0.14	-0.01	0.22	0.03	-0.09	-0.28	0.08	0.06	0.01	0.18	0.09	-0.03	0.11	0.05	0.3
A0A1B0GS91	Svil	Isoform of Q8K4L3, Supervillin OS=Mus musculus OX=10090 GN=Svil PE=1 SV=1	9.05e+18	0	319.515	32	53	423	0	53	1	1490.61	423	53	0	>tr|A0A1B0GS91|A0A1B0GS91_MOUSE Isoform of Q8K4L3, Supervillin OS=Mus musculus OX=10090 GN=Svil PE=1 SV=1	-0.08	-0.05	0.12	0.1	0.08	0.09	0.38	0	0.2	0.14	0.12	0.08	0	-0.12	-0.07	0	0.04	0.02	-0.07	0	0.08	-0.07	0.05	-0.04	0.07	0.1	0.08	-0.02	0.08	-0.02	0.04	-0.08	0.11
E9QQ57	Prx	Isoform of O55103, Periaxin OS=Mus musculus OX=10090 GN=Prx PE=1 SV=1	5.93e+18	0	319.395	49	42	568	0	1	1	1889.59	568	42	0	>tr|E9QQ57|E9QQ57_MOUSE Isoform of O55103, Periaxin OS=Mus musculus OX=10090 GN=Prx PE=1 SV=1	NaN	NaN	NaN	NaN	NaN	NaN	NaN	NaN	NaN	NaN	NaN	NaN	NaN	NaN	NaN	NaN	NaN	NaN	NaN	NaN	NaN	NaN	0.78	NaN	NaN	NaN	NaN	NaN	NaN	NaN	NaN	NaN	NaN
P32848	Pvalb	Parvalbumin alpha OS=Mus musculus OX=10090 GN=Pvalb PE=1 SV=3	2.27e+18	0	315.372	88	34	6451	34	34	1	18957.6	6451	34	0	>sp|P32848|PRVA_MOUSE Parvalbumin alpha OS=Mus musculus OX=10090 GN=Pvalb PE=1 SV=3	0.41	0.67	0.05	-0.14	-0.29	0.19	-0.25	-0.04	-0.29	-0.4	-0.01	-0.23	-0.16	-0.45	-0.1	0.03	-0.12	0.3	0.25	-0.33	-0.38	-0.35	-0.34	0.06	-0.29	0.16	-0.89	-0.15	-0.43	-0.4	-0.36	-0.34	-0.46
E9Q586	Dctn1	Isoform of O08788, Dynactin subunit 1 OS=Mus musculus OX=10090 GN=Dctn1 PE=1 SV=1	-7.59e+18	0	314.754	45	39	418	0	39	1	1658.76	418	39	0	>tr|E9Q586|E9Q586_MOUSE Isoform of O08788, Dynactin subunit 1 OS=Mus musculus OX=10090 GN=Dctn1 PE=1 SV=1	0.07	0.09	0.09	0.07	0.14	0.27	0.05	0.03	0.12	-0.01	0.11	0.1	0.09	-0.05	-0.02	0.04	0.12	0.08	0.01	-0.18	-0.02	-0.2	-0.16	-0.08	0.01	0.12	-0.18	0	0.08	-0.03	0.12	0.05	0.24
A0A087WR50	Fn1	Isoform of P11276, Fibronectin OS=Mus musculus OX=10090 GN=Fn1 PE=1 SV=1	-3.15e+17	0	313.486	33	47	433	0	47	1	1604.49	433	47	0	>tr|A0A087WR50|A0A087WR50_MOUSE Isoform of P11276, Fibronectin OS=Mus musculus OX=10090 GN=Fn1 PE=1 SV=1	-0.01	0.36	0	-0.26	-0.4	-0.31	-0.42	-0.35	-0.36	-0.3	-0.47	0.25	-0.57	-0.32	-0.16	-0.29	-0.28	-0.13	-0.42	0.31	-0.04	0.05	0.08	-0.34	-0.26	-0.09	0.4	-0.29	0.13	0.16	-0.32	-0.22	-0.18
O70373	Xirp1	Xin actin-binding repeat-containing protein 1 OS=Mus musculus OX=10090 GN=Xirp1 PE=1 SV=2	-3.83e+18	0	313.472	56	45	425	3	3	1	1628.88	425	45	43	>sp|O70373|XIRP1_MOUSE Xin actin-binding repeat-containing protein 1 OS=Mus musculus OX=10090 GN=Xirp1 PE=1 SV=2	0.01	-0.5	0.11	0.08	-0.04	-0.13	0.2	-0.02	0.08	0.13	-0.02	-0.33	-0.19	-0.15	-0.15	-0.41	-0.19	-0.02	-0.05	0.13	0.03	-0.02	0.39	-0.01	-0.04	0.18	0.88	-0.1	0.04	-0.13	-0.07	-0.09	0.53
A6ZI46	Aldoart1	Fructose-bisphosphate aldolase OS=Mus musculus OX=10090 GN=Aldoart1 PE=1 SV=1	6.26e+18	0	312.206	49	27	8026	0	2	1	25319.5	8026	27	0	>tr|A6ZI46|A6ZI46_MOUSE Fructose-bisphosphate aldolase OS=Mus musculus OX=10090 GN=Aldoart1 PE=1 SV=1	0.29	0.42	0.16	-0.2	0.06	-0.09	0.04	-0.01	-0.23	-0.27	0.32	0.12	0.44	0.34	-0.15	-0.21	0.3	0.14	0.21	-0.3	-0.01	-0.43	-0.22	-0.23	0.25	-0.39	-0.21	0.03	-0.13	-0.18	0.11	0.19	0
Q04857	Col6a1	Collagen alpha-1(VI) chain OS=Mus musculus OX=10090 GN=Col6a1 PE=1 SV=1	3.15e+18	0	311.517	40	29	1005	29	29	1	3926.99	1005	29	0	>sp|Q04857|CO6A1_MOUSE Collagen alpha-1(VI) chain OS=Mus musculus OX=10090 GN=Col6a1 PE=1 SV=1	0.2	0.55	0.12	0.01	-0.08	0.03	-0.25	-0.08	-0.2	-0.19	-0.13	0.32	-0.24	-0.14	-0.03	-0.06	-0.14	-0.14	-0.15	0.16	-0.03	-0.02	0.23	-0.15	0.05	0.08	0.36	-0.05	0.12	0.02	-0.04	-0.09	-0.06
E9PUD2	Dnm1l	Isoform of Q8K1M6, Dynamin-1-like protein OS=Mus musculus OX=10090 GN=Dnm1l PE=1 SV=1	-1.23e+18	0	311.279	65	40	667	1	40	1	2487.89	667	40	0	>tr|E9PUD2|E9PUD2_MOUSE Isoform of Q8K1M6, Dynamin-1-like protein OS=Mus musculus OX=10090 GN=Dnm1l PE=1 SV=1	-0.07	-0.21	-0.01	-0.03	0.03	-0.04	-0.02	0.09	-0.1	-0.01	-0.01	-0.25	-0.14	-0.27	-0.23	-0.09	-0.01	-0.08	0.03	-0.12	0.17	0.03	-0.18	-0.33	-0.13	0.08	-0.02	0.01	0.03	-0.21	0.02	-0.14	0.1
J9JIB2	Obscn	Isoform of A2AAJ9, Obscurin (Fragment) OS=Mus musculus OX=10090 GN=Obscn PE=1 SV=1	3.8e+18	0	310.196	58	37	848	2	2	1	3190.62	848	37	0	>tr|J9JIB2|J9JIB2_MOUSE Isoform of A2AAJ9, Obscurin (Fragment) OS=Mus musculus OX=10090 GN=Obscn PE=1 SV=1	0.21	0.2	-0.09	0.1	0.09	0.18	0.01	0.1	-0.27	-0.35	0.2	0.14	0.02	-0.32	0.02	0.03	0.09	-1.78	-2.07	-0.22	0.2	-0.18	-0.28	0.17	0.39	-0.19	-0.24	-0.03	-0.16	0.1	-0.08	0.01	-0.17
E9QAX2	Myo18a	Isoform of Q9JMH9, Unconventional myosin-XVIIIa OS=Mus musculus OX=10090 GN=Myo18a PE=1 SV=1	-1.89e+18	0	306.026	29	49	491	0	48	1	1815.86	491	49	1	>tr|E9QAX2|E9QAX2_MOUSE Isoform of Q9JMH9, Unconventional myosin-XVIIIa OS=Mus musculus OX=10090 GN=Myo18a PE=1 SV=1	0.16	0.04	0	-0.14	-0.05	-0.08	0.08	-0.05	-0.14	-0.05	-0.02	0.17	-0.09	-0.25	-0.23	-0.13	-0.04	-0.01	-0.02	-0.21	-0.05	-0.12	-0.03	-0.12	-0.04	0.08	-0.3	0.01	-0.16	-0.24	-0.1	-0.22	0.03
E9QQ93	Xirp1	Isoform of O70373, Xin actin-binding repeat-containing protein 1 OS=Mus musculus OX=10090 GN=Xirp1 PE=1 SV=1	-3.21e+18	0	302.982	52	44	419	2	2	1	1597.34	419	44	0	>tr|E9QQ93|E9QQ93_MOUSE Isoform of O70373, Xin actin-binding repeat-containing protein 1 OS=Mus musculus OX=10090 GN=Xirp1 PE=1 SV=1	NaN	NaN	NaN	NaN	NaN	NaN	NaN	NaN	NaN	NaN	NaN	NaN	0.19	NaN	NaN	-0.24	0.67	NaN	NaN	NaN	NaN	0.18	NaN	NaN	NaN	1.87	NaN	NaN	NaN	NaN	NaN	NaN	NaN
Q5DTJ9	Mypn	Myopalladin OS=Mus musculus OX=10090 GN=Mypn PE=1 SV=2	7.74e+18	0	302.926	47	41	495	32	40	1	1579.74	495	41	1	>sp|Q5DTJ9|MYPN_MOUSE Myopalladin OS=Mus musculus OX=10090 GN=Mypn PE=1 SV=2	-0.05	-0.09	0.11	0.07	-0.03	-0.04	0.12	0.05	0.07	0.22	0.05	-0.13	0.08	-0.05	-0.05	-0.15	-0.12	0.09	0.01	-0.06	0.1	-0.03	-0.07	-0.1	-0.02	0.16	0.31	-0.1	-0.1	-0.23	0	-0.09	0.12
Q7TSH2	Phkb	Phosphorylase b kinase regulatory subunit beta OS=Mus musculus OX=10090 GN=Phkb PE=1 SV=1	8.32e+18	0	302.494	46	38	937	24	38	1	3291.03	937	38	0	>sp|Q7TSH2|KPBB_MOUSE Phosphorylase b kinase regulatory subunit beta OS=Mus musculus OX=10090 GN=Phkb PE=1 SV=1	0.22	0.03	0.12	0.04	0.14	0.13	0.18	-0.07	0.09	0.3	0.26	0.04	0	-0.15	-0.07	-0.04	0.04	0.16	0.08	-0.27	0.03	-0.01	-0.04	-0.17	0.01	0.06	-0.26	0.12	-0.03	-0.22	0.13	0.01	0.2
Q61554	Fbn1	Fibrillin-1 OS=Mus musculus OX=10090 GN=Fbn1 PE=1 SV=2	-5.1e+18	0	301.714	24	57	659	55	55	1	1999.97	659	57	3	>sp|Q61554|FBN1_MOUSE Fibrillin-1 OS=Mus musculus OX=10090 GN=Fbn1 PE=1 SV=2	-0.01	0.18	0.08	-0.13	-0.08	-0.16	-0.17	0	-0.05	-0.25	0.22	0.28	-0.29	0.29	-0.01	-0.38	0.35	0.09	-0.2	-0.03	-0.01	-0.31	0.13	-0.47	0.29	-0.22	0.4	0.02	-0.1	-0.13	0.13	0.15	-0.02
Q8CGY6	Unc45b	Protein unc-45 homolog B OS=Mus musculus OX=10090 GN=Unc45b PE=1 SV=1	-3.97e+18	0	300.432	57	47	729	0	47	1	2535.82	729	47	0	>sp|Q8CGY6|UN45B_MOUSE Protein unc-45 homolog B OS=Mus musculus OX=10090 GN=Unc45b PE=1 SV=1	0.02	0.06	-0.07	-0.19	-0.02	-0.21	-0.08	0.07	-0.24	-0.02	0.12	-0.12	-0.1	-0.37	-0.44	-0.09	0.01	0.24	0.13	-0.33	0.05	-0.03	0.05	-0.36	0.04	0.05	-0.08	-0.17	0.02	-0.21	0.13	-0.12	0.1
Q922D8	Mthfd1	C-1-tetrahydrofolate synthase, cytoplasmic OS=Mus musculus OX=10090 GN=Mthfd1 PE=1 SV=4	9.1e+18	0	297.633	65	43	597	9	43	1	1939.92	597	43	0	>sp|Q922D8|C1TC_MOUSE C-1-tetrahydrofolate synthase, cytoplasmic OS=Mus musculus OX=10090 GN=Mthfd1 PE=1 SV=4	-0.04	-0.03	-0.11	-0.06	0.02	0.12	0.07	-0.06	0.01	0.11	0.08	0	0.08	-0.1	-0.01	0.15	0.05	0.08	0.03	-0.24	-0.06	-0.11	-0.1	0.06	0.06	0.11	-0.21	-0.04	-0.05	-0.06	-0.03	0.04	0
Q9JIF9	Myot	Myotilin OS=Mus musculus OX=10090 GN=Myot PE=1 SV=1	8.34e+18	0	295.82	82	28	932	28	28	1	3151.82	932	28	0	>sp|Q9JIF9|MYOTI_MOUSE Myotilin OS=Mus musculus OX=10090 GN=Myot PE=1 SV=1	-0.41	-0.27	-0.18	-0.11	-0.06	-0.34	0.2	0.05	0.04	0.01	-0.04	-0.24	-0.18	-0.19	-0.05	-0.26	-0.12	-0.17	0.05	0.05	0.25	0.09	0.26	-0.34	0.06	-0.12	0.66	0.01	0.01	-0.22	-0.04	-0.09	0.08
Q6URW6-3	Myh14	Isoform of Q6URW6, Isoform 3 of Myosin-14 OS=Mus musculus OX=10090 GN=Myh14	7.1e+18	0	295.68	34	57	431	0	51	1	1489.51	431	57	0	>sp|Q6URW6-3|MYH14_MOUSE Isoform of Q6URW6, Isoform 3 of Myosin-14 OS=Mus musculus OX=10090 GN=Myh14	-0.16	-0.18	0.04	0.04	-0.05	-0.13	0.11	0.15	0	0.16	-0.1	-0.05	-0.05	-0.06	-0.09	-0.1	-0.06	-0.22	0.01	0.09	0.1	0.25	0.06	-0.16	-0.07	0.03	0.1	0.2	-0.01	-0.09	0	-0.12	0
A0A0U1RPN8	Aldoa	Isoform of P05064, Fructose-bisphosphate aldolase A (Fragment) OS=Mus musculus OX=10090 GN=Aldoa PE=1 SV=1	3.12e+18	0	295.315	88	25	6862	1	1	1	25235.7	6862	25	0	>tr|A0A0U1RPN8|A0A0U1RPN8_MOUSE Isoform of P05064, Fructose-bisphosphate aldolase A (Fragment) OS=Mus musculus OX=10090 GN=Aldoa PE=1 SV=1	NaN	NaN	NaN	-0.16	NaN	NaN	NaN	NaN	NaN	NaN	NaN	-0.47	NaN	NaN	-0.31	NaN	NaN	0.05	NaN	NaN	NaN	NaN	NaN	NaN	NaN	NaN	NaN	NaN	NaN	NaN	NaN	NaN	NaN
Q6P8J7	Ckmt2	Creatine kinase S-type, mitochondrial OS=Mus musculus OX=10090 GN=Ckmt2 PE=1 SV=1	3.1e+18	0	294.949	64	24	1470	22	22	1	5890.02	1470	24	2	>sp|Q6P8J7|KCRS_MOUSE Creatine kinase S-type, mitochondrial OS=Mus musculus OX=10090 GN=Ckmt2 PE=1 SV=1	-0.71	-0.48	-0.23	-0.07	0.13	-0.36	0.01	0.11	0.3	-0.05	-0.05	-0.31	-0.18	0.02	0.27	-0.18	-0.15	-0.47	0.01	-0.08	0.22	0.13	0.13	-0.37	0.22	-0.06	0.28	0.19	0.02	0.06	-0.11	0.08	0.08
P68372	Tubb4b	Tubulin beta-4B chain OS=Mus musculus OX=10090 GN=Tubb4b PE=1 SV=1	6.67e+18	0	294.53	69	22	1319	1	1	1	4815.97	1319	22	30	>sp|P68372|TBB4B_MOUSE Tubulin beta-4B chain OS=Mus musculus OX=10090 GN=Tubb4b PE=1 SV=1	0.06	0.05	-0.01	0.02	-0.1	0.06	0.08	-0.04	0.06	0.04	0.03	0.06	-0.06	0.04	-0.09	-0.02	0.03	0.1	0.09	0	-0.06	-0.08	-0.04	-0.01	0	0.02	0.18	0.04	0.03	0.01	0.06	0.06	0.03
Q61941	Nnt	NAD(P) transhydrogenase, mitochondrial OS=Mus musculus OX=10090 GN=Nnt PE=1 SV=2	-8.09e+18	0	294.525	39	37	801	12	37	1	2541.74	801	37	0	>sp|Q61941|NNTM_MOUSE NAD(P) transhydrogenase, mitochondrial OS=Mus musculus OX=10090 GN=Nnt PE=1 SV=2	-0.3	-0.01	0.23	0.33	0.52	0.05	0.5	0.51	0.96	0.64	0.39	-0.09	0.2	0.49	0.73	0.29	0.27	-0.41	0.02	-0.27	0.12	0.35	0.4	-0.01	0.72	0.04	0.06	0.58	0.45	0.45	0.35	0.59	0.34
Q3UH59	Myh10	Isoform of Q61879, Myosin-10 OS=Mus musculus OX=10090 GN=Myh10 PE=1 SV=1	4.4e+18	0	294.12	30	45	457	0	29	1	1534.04	457	45	0	>tr|Q3UH59|Q3UH59_MOUSE Isoform of Q61879, Myosin-10 OS=Mus musculus OX=10090 GN=Myh10 PE=1 SV=1	-0.25	-0.29	-0.15	0.04	-0.2	-0.16	0.24	-0.1	-0.13	-0.15	-0.23	-0.04	-0.16	-0.06	0.05	-0.04	0	-0.21	-0.23	0.14	0.01	0.02	0.16	-0.1	0.18	-0.05	0.13	-0.09	-0.03	0.02	-0.05	-0.05	0.19
P31001	Des	Desmin OS=Mus musculus OX=10090 GN=Des PE=1 SV=3	4.75e+18	0	292.858	73	34	2241	31	31	1	8791.23	2241	34	3	>sp|P31001|DESM_MOUSE Desmin OS=Mus musculus OX=10090 GN=Des PE=1 SV=3	-0.08	-0.29	-0.07	0.01	-0.16	-0.13	-0.21	0.24	-0.11	-0.1	-0.16	-0.26	-0.17	-0.13	-0.03	-0.09	-0.04	0.03	-0.03	0.05	0.17	0.03	0.05	-0.19	-0.04	0.1	0.42	0.08	0.07	-0.03	0.04	0.02	0.1
Q9D0K2	Oxct1	Succinyl-CoA:3-ketoacid coenzyme A transferase 1, mitochondrial OS=Mus musculus OX=10090 GN=Oxct1 PE=1 SV=1	2.74e+18	0	292.549	55	19	1074	1	19	1	4343.33	1074	19	0	>sp|Q9D0K2|SCOT1_MOUSE Succinyl-CoA:3-ketoacid coenzyme A transferase 1, mitochondrial OS=Mus musculus OX=10090 GN=Oxct1 PE=1 SV=1	-0.4	-0.34	-0.02	0.08	0.25	-0.07	0.17	0.26	0.41	0.13	0.13	-0.01	-0.12	0.01	0.17	0.26	0.16	-0.19	-0.02	0.04	0.34	0.11	0.17	-0.17	0.19	0.07	-0.1	0.31	0.21	0.17	0.26	0.34	0.26
P48678	Lmna	Prelamin-A/C OS=Mus musculus OX=10090 GN=Lmna PE=1 SV=2	-2.35e+18	0	287.376	63	42	950	2	41	1	3266.08	950	42	1	>sp|P48678|LMNA_MOUSE Prelamin-A/C OS=Mus musculus OX=10090 GN=Lmna PE=1 SV=2	0.07	0.39	-0.05	-0.1	0.04	0.18	0.04	-0.1	0.04	0.13	0.07	0.31	0	0.14	0.17	-0.08	-0.14	-0.16	-0.09	0.24	0.1	-0.27	-0.11	0.18	0.26	0.17	0.26	0.17	0.08	0.05	-0.08	0.03	-0.12
E9Q4Z2	Acacb	Acetyl-CoA carboxylase 2 OS=Mus musculus OX=10090 GN=Acacb PE=1 SV=1	8.96e+18	0	285.78	28	47	364	38	38	1	1285.36	364	47	0	>sp|E9Q4Z2|ACACB_MOUSE Acetyl-CoA carboxylase 2 OS=Mus musculus OX=10090 GN=Acacb PE=1 SV=1	0.04	-0.03	0.05	0.1	0.11	-0.01	0.02	0.05	0.12	0.06	0.31	0.11	0.15	0.26	0.32	-0.01	0	-0.09	0.05	0.09	0.21	-0.19	-0.19	0.06	0.12	0.16	0.03	0.05	0.1	0.14	0.09	0.15	0.19
Q91YE8	Synpo2	Synaptopodin-2 OS=Mus musculus OX=10090 GN=Synpo2 PE=1 SV=2	-1.41e+18	0	285.409	35	26	713	0	1	1	2876.87	713	26	0	>sp|Q91YE8|SYNP2_MOUSE Synaptopodin-2 OS=Mus musculus OX=10090 GN=Synpo2 PE=1 SV=2	0.31	0.22	0.06	-0.07	0.12	0.22	0.11	0.02	0.04	0.04	0.25	0.1	0.03	-0.13	-0.09	0.23	0.27	0.18	0.12	-0.23	0.01	-0.07	0.07	0.19	0.25	0.09	-0.71	-0.07	-0.06	-0.15	0.12	0.19	0.17
Q8K010	Oplah	5-oxoprolinase OS=Mus musculus OX=10090 GN=Oplah PE=1 SV=1	1.55e+18	0	284.937	44	41	519	12	40	1	1900.6	519	41	1	>sp|Q8K010|OPLA_MOUSE 5-oxoprolinase OS=Mus musculus OX=10090 GN=Oplah PE=1 SV=1	-0.12	-0.01	-0.08	-0.02	0.04	-0.16	-0.01	0.11	0.1	0.06	-0.27	-0.19	-0.05	0.04	-0.07	0.03	0	0.11	0.22	0.1	0.18	0.28	0.27	-0.45	-0.27	-0.08	0.26	0.07	0.02	-0.1	0.08	0.03	0.05
P28650	Adssl1	Adenylosuccinate synthetase isozyme 1 OS=Mus musculus OX=10090 GN=Adssl1 PE=1 SV=2	1.15e+17	0	282.523	68	26	1406	1	25	1	5455	1406	26	1	>sp|P28650|PURA1_MOUSE Adenylosuccinate synthetase isozyme 1 OS=Mus musculus OX=10090 GN=Adssl1 PE=1 SV=2	0.3	0.35	0.08	0.06	0.29	0.18	0.15	0.04	-0.01	0.12	0.24	0.04	0.06	-0.07	0.08	0.07	0.03	0.22	0.18	-0.31	-0.11	-0.04	-0.12	0.22	0.24	0.27	-0.17	0.2	0.07	-0.1	0.1	0.08	0
P80314	Cct2	T-complex protein 1 subunit beta OS=Mus musculus OX=10090 GN=Cct2 PE=1 SV=4	-3.48e+17	0	281.965	72	28	546	12	28	1	2168.07	546	28	0	>sp|P80314|TCPB_MOUSE T-complex protein 1 subunit beta OS=Mus musculus OX=10090 GN=Cct2 PE=1 SV=4	-0.01	0.01	0.12	0.13	0.01	-0.01	0.18	-0.07	0.05	0.05	0.11	0.15	0.02	-0.02	-0.01	0.06	-0.01	0.2	0.14	0.04	0.04	0.04	0.07	0.13	-0.03	0.03	-0.15	-0.11	0.06	0.12	0.19	0.06	0.1
Q3V117	Acly	Isoform of Q91V92, ATP-citrate synthase OS=Mus musculus OX=10090 GN=Acly PE=1 SV=1	6.3e+18	0	280.244	49	43	481	0	1	1	1593.84	481	43	0	>tr|Q3V117|Q3V117_MOUSE Isoform of Q91V92, ATP-citrate synthase OS=Mus musculus OX=10090 GN=Acly PE=1 SV=1	-0.16	NaN	-0.55	NaN	NaN	NaN	NaN	0.03	NaN	NaN	0.31	NaN	1.95	2.79	NaN	1.85	NaN	NaN	NaN	NaN	0.23	0.96	NaN	NaN	0.15	NaN	0.8	0.02	NaN	0.83	NaN	0.6	-0.73
F8VQE0	Cacna1s	Isoform of Q02789, Voltage-dependent L-type calcium channel subunit alpha OS=Mus musculus OX=10090 GN=Cacna1s PE=1 SV=1	4.05e+18	0	279.564	18	33	718	0	33	1	2439.45	718	33	0	>tr|F8VQE0|F8VQE0_MOUSE Isoform of Q02789, Voltage-dependent L-type calcium channel subunit alpha OS=Mus musculus OX=10090 GN=Cacna1s PE=1 SV=1	0.21	0.16	0.07	-0.02	0.02	0.04	-0.02	0.06	-0.1	0.04	0.22	0.03	-0.04	-0.07	-0.14	-0.12	0.06	0.23	0.22	-0.22	0.09	-0.03	0.03	0.12	0.06	-0.02	-0.01	0.02	-0.03	-0.15	0.08	-0.01	0.06
B7ZNH7	Col14a1	Isoform of Q80X19, Collagen alpha-1(XIV) chain OS=Mus musculus OX=10090 GN=Col14a1 PE=1 SV=1	-2.45e+18	0	278.559	34	44	458	1	44	1	1490.15	458	44	0	>tr|B7ZNH7|B7ZNH7_MOUSE Isoform of Q80X19, Collagen alpha-1(XIV) chain OS=Mus musculus OX=10090 GN=Col14a1 PE=1 SV=1	0.02	-0.48	0.29	0.09	-0.08	-0.12	-0.46	-0.64	-0.3	-0.34	-0.39	0.93	0.02	-0.28	-0.24	-0.36	-0.53	0.02	-0.61	0.32	-0.79	-0.13	-0.12	0.15	-0.07	0.02	-0.18	-0.6	-0.42	0.38	-0.28	-0.18	-0.54
E9Q1U2	Synpo2	Isoform of Q91YE8, Synaptopodin-2 OS=Mus musculus OX=10090 GN=Synpo2 PE=1 SV=1	-8.46e+17	0	278.368	30	26	684	0	1	1	2778.79	684	26	31	>tr|E9Q1U2|E9Q1U2_MOUSE Isoform of Q91YE8, Synaptopodin-2 OS=Mus musculus OX=10090 GN=Synpo2 PE=1 SV=1	0.12	0.15	-0.03	-0.04	-0.06	-0.06	-0.01	-0.07	-0.17	-0.05	0.05	-0.07	-0.11	-0.03	-0.13	-0.06	-0.02	0.07	0.02	-0.18	-0.13	-0.08	-0.05	-0.1	0.05	0.03	-0.14	0	-0.03	-0.15	0	0.05	0.05
Q91V92	Acly	ATP-citrate synthase OS=Mus musculus OX=10090 GN=Acly PE=1 SV=1	6.92e+18	0	278.313	49	43	486	1	1	1	1597.47	486	43	46	>sp|Q91V92|ACLY_MOUSE ATP-citrate synthase OS=Mus musculus OX=10090 GN=Acly PE=1 SV=1	-0.45	0.16	-0.36	1.1	-0.24	0.81	0.38	-0.55	1.32	-0.1	0.68	2.23	2.04	2.62	1.94	2.1	0.31	-0.37	-0.29	1.53	0.57	0.66	0.66	1.57	0.49	-0.06	0.62	-0.58	0.32	1.98	0.12	1.47	-0.27
O09165	Casq1	Calsequestrin-1 OS=Mus musculus OX=10090 GN=Casq1 PE=1 SV=3	-2.46e+18	0	275.567	49	18	3511	9	9	1	12891.9	3511	18	9	>sp|O09165|CASQ1_MOUSE Calsequestrin-1 OS=Mus musculus OX=10090 GN=Casq1 PE=1 SV=3	0.18	0.23	-0.01	0	-0.07	0.04	-0.18	0.1	-0.17	-0.05	0.12	0	-0.1	-0.16	-0.08	-0.01	-0.03	0.27	0.15	-0.1	0.11	-0.04	0.01	0.1	0.02	0.18	-0.19	0.01	-0.17	-0.23	0.02	0.07	-0.1
Q6P1B9	Bin1	Isoform of O08539, Bin1 protein OS=Mus musculus OX=10090 GN=Bin1 PE=1 SV=1	-2.13e+18	0	272.795	63	26	1192	0	24	1	5023.05	1192	26	2	>tr|Q6P1B9|Q6P1B9_MOUSE Isoform of O08539, Bin1 protein OS=Mus musculus OX=10090 GN=Bin1 PE=1 SV=1	0.12	0.03	0	-0.08	-0.11	-0.04	0.07	0	-0.02	0	0.07	-0.05	-0.03	-0.02	-0.15	0.09	0.14	0.19	0.05	-0.24	-0.02	-0.01	-0.07	-0.07	0.04	0.04	-0.01	-0.04	-0.09	-0.15	0.09	0.05	0.12
Q5SWU9-2	Acaca	Isoform of Q5SWU9, Isoform 2 of Acetyl-CoA carboxylase 1 OS=Mus musculus OX=10090 GN=Acaca	-6.9e+18	0	272.358	30	53	339	0	44	1	1147.68	339	53	9	>sp|Q5SWU9-2|ACACA_MOUSE Isoform of Q5SWU9, Isoform 2 of Acetyl-CoA carboxylase 1 OS=Mus musculus OX=10090 GN=Acaca	-0.19	0.22	-0.26	0.84	-0.19	0.47	0.14	-0.27	0.54	-0.08	0.27	1.42	1.55	1.92	1.55	1.59	-0.02	-0.39	0	0.64	0.37	0.71	0.58	0.73	0.27	0.07	0.49	-0.45	0.05	1.59	-0.03	1.17	-0.17
P97861	Krt86	Keratin, type II cuticular Hb6 OS=Mus musculus OX=10090 GN=Krt86 PE=2 SV=2	-8.58e+16	0	271.587	52	31	1125	0	4	1	4035.53	1125	31	11	>sp|P97861|KRT86_MOUSE Keratin, type II cuticular Hb6 OS=Mus musculus OX=10090 GN=Krt86 PE=2 SV=2	-0.35	0.77	-0.04	0.08	-0.54	0.3	0.48	-0.51	-0.44	-0.7	0.59	1.26	0.23	-0.46	0.63	-0.71	-0.75	0.63	0.35	-0.34	-0.18	-1.24	-0.85	0.88	1.24	-0.66	0.19	0.71	0.96	-0.29	0.2	-0.63	-0.06
P20029	Hspa5	Endoplasmic reticulum chaperone BiP OS=Mus musculus OX=10090 GN=Hspa5 PE=1 SV=3	-9.01e+18	0	271.206	53	33	937	30	30	1	3362.14	937	33	0	>sp|P20029|BIP_MOUSE Endoplasmic reticulum chaperone BiP OS=Mus musculus OX=10090 GN=Hspa5 PE=1 SV=3	0.14	0.14	-0.09	-0.01	-0.12	-0.08	-0.2	-0.06	-0.12	-0.15	-0.1	0.07	-0.05	-0.15	-0.01	0.06	0.02	-0.04	-0.12	0	-0.04	-0.04	0.01	0.14	-0.04	0.04	-0.02	-0.13	-0.17	0.05	-0.12	0.01	-0.03
A0A1W2P7N3	Lama2	Isoform of Q60675, Laminin subunit alpha-2 (Fragment) OS=Mus musculus OX=10090 GN=Lama2 PE=1 SV=1	-8.2e+18	0	270.865	42	37	745	1	1	1	2571.58	745	37	0	>tr|A0A1W2P7N3|A0A1W2P7N3_MOUSE Isoform of Q60675, Laminin subunit alpha-2 (Fragment) OS=Mus musculus OX=10090 GN=Lama2 PE=1 SV=1	0.45	-0.01	NaN	-0.11	0.58	0.43	0.18	-0.15	-0.03	0.11	NaN	0.81	0.32	NaN	0.31	0.01	-0.11	0.87	0.34	-0.36	0.16	0.13	-0.13	0.93	0.91	0.58	NaN	0.86	0.07	0.24	-0.43	-0.05	-0.17
P13707	Gpd1	Glycerol-3-phosphate dehydrogenase [NAD(+)], cytoplasmic OS=Mus musculus OX=10090 GN=Gpd1 PE=1 SV=3	5.54e+18	0	269.244	67	26	1720	0	24	1	5791.4	1720	26	4	>sp|P13707|GPDA_MOUSE Glycerol-3-phosphate dehydrogenase [NAD(+)], cytoplasmic OS=Mus musculus OX=10090 GN=Gpd1 PE=1 SV=3	0.27	0.18	0.16	0.14	0.13	0	0.09	0.04	-0.05	0.19	0.28	0.06	0.17	0.02	-0.04	0.05	0.08	0.07	0.03	-0.32	-0.09	0.09	-0.01	-0.28	0.1	0.14	-0.31	0.07	-0.16	-0.33	0.1	0.11	0.14
Q9Z1E4	Gys1	Glycogen [starch] synthase, muscle OS=Mus musculus OX=10090 GN=Gys1 PE=1 SV=2	-6.53e+18	0	268.29	52	31	798	1	31	1	2928.78	798	31	0	>sp|Q9Z1E4|GYS1_MOUSE Glycogen [starch] synthase, muscle OS=Mus musculus OX=10090 GN=Gys1 PE=1 SV=2	0.11	0.07	-0.02	-0.09	0.06	-0.07	-0.08	0.06	-0.05	0.06	0.05	-0.22	-0.25	-0.27	-0.12	-0.01	-0.05	-0.03	0.08	-0.26	-0.02	0.04	-0.03	-0.21	-0.02	0.32	-0.07	0.07	-0.06	-0.21	-0.04	-0.09	0.15
P11087	Col1a1	Collagen alpha-1(I) chain OS=Mus musculus OX=10090 GN=Col1a1 PE=1 SV=4	6.76e+18	0	266.683	32	38	1243	5	37	1	3764.35	1243	38	1	>sp|P11087|CO1A1_MOUSE Collagen alpha-1(I) chain OS=Mus musculus OX=10090 GN=Col1a1 PE=1 SV=4	0.38	1.37	-0.14	-0.91	-0.2	0.01	-0.71	-0.73	-1.02	-0.82	-0.37	0.67	-0.79	0.1	-0.25	-0.51	-0.66	-1.14	-0.74	-0.23	-0.09	-0.62	0.21	-0.93	0.25	-0.1	0.67	0.21	0.2	-0.26	-0.44	-0.51	-0.29
P56399	Usp5	Ubiquitin carboxyl-terminal hydrolase 5 OS=Mus musculus OX=10090 GN=Usp5 PE=1 SV=1	-8.97e+18	0	266.28	47	31	491	0	31	1	1716.33	491	31	0	>sp|P56399|UBP5_MOUSE Ubiquitin carboxyl-terminal hydrolase 5 OS=Mus musculus OX=10090 GN=Usp5 PE=1 SV=1	0.06	0.18	0.12	0.02	0.09	0.13	0	0.02	-0.01	0	0.11	0.01	-0.02	0.03	-0.07	0.08	-0.03	0.01	0.02	-0.02	0.03	-0.05	-0.09	0.08	-0.03	0.17	-0.09	0.05	-0.01	-0.09	-0.01	-0.03	0.12
Q9JK37	Myoz1	Myozenin-1 OS=Mus musculus OX=10090 GN=Myoz1 PE=1 SV=1	5.47e+17	0	266.229	84	17	2646	17	17	1	8286.03	2646	17	0	>sp|Q9JK37|MYOZ1_MOUSE Myozenin-1 OS=Mus musculus OX=10090 GN=Myoz1 PE=1 SV=1	0.16	0.16	0.12	0.06	0.11	0.04	0.07	0.05	0.04	0.19	0.12	0	0.01	-0.03	-0.03	0.02	-0.01	0.17	0.16	-0.14	0.11	0.04	0.02	0.05	0.02	0.02	-0.28	0.12	0.03	-0.13	0.07	-0.03	-0.05
E9Q1Y9	Krt83	Keratin 83 OS=Mus musculus OX=10090 GN=Krt83 PE=1 SV=1	-6.3e+18	0	265.893	53	31	1144	2	2	1	4101.2	1144	31	0	>tr|E9Q1Y9|E9Q1Y9_MOUSE Keratin 83 OS=Mus musculus OX=10090 GN=Krt83 PE=1 SV=1	-0.42	0.88	-0.03	0	-0.66	0.28	0.54	-0.55	-0.58	-0.83	0.5	1.19	0.39	-0.46	0.58	-1.04	-0.66	0.58	0.23	-0.39	-0.17	-1.3	-1.1	0.59	1.31	-1.18	0.07	0.82	1.12	-0.23	0.1	-0.7	-0.18
A0A1B0GSX0	Ldha	Isoform of P06151, L-lactate dehydrogenase OS=Mus musculus OX=10090 GN=Ldha PE=1 SV=1	5.2e+18	0	265.85	75	28	3575	0	26	1	9639.87	3575	28	2	>tr|A0A1B0GSX0|A0A1B0GSX0_MOUSE Isoform of P06151, L-lactate dehydrogenase OS=Mus musculus OX=10090 GN=Ldha PE=1 SV=1	0.11	0.01	0.15	0.02	0.04	-0.22	-0.08	0.05	-0.38	0.02	0.08	-0.23	-0.15	-0.26	-0.48	-0.16	-0.01	0.08	0.08	-0.37	0.07	0.01	-0.14	-0.35	-0.12	0.04	-0.32	0.13	0.04	-0.25	0.2	-0.11	0.01
P99024	Tubb5	Tubulin beta-5 chain OS=Mus musculus OX=10090 GN=Tubb5 PE=1 SV=1	6.48e+18	0	265.013	69	22	977	4	4	1	3430.03	977	22	2	>sp|P99024|TBB5_MOUSE Tubulin beta-5 chain OS=Mus musculus OX=10090 GN=Tubb5 PE=1 SV=1	0.09	-0.07	-0.18	-0.03	-0.35	0.15	0.02	-0.19	0.17	-0.03	-0.32	0.27	-0.22	0.07	-0.05	0.02	0.04	-0.07	0.19	0.11	-0.06	0.02	0.28	0.13	-0.07	-0.16	0.31	-0.14	0.06	0.31	-0.04	-0.04	0.04
Q8CGK3	Lonp1	Lon protease homolog, mitochondrial OS=Mus musculus OX=10090 GN=Lonp1 PE=1 SV=2	-4.54e+18	0	264.118	53	33	467	33	33	1	1555.26	467	33	0	>sp|Q8CGK3|LONM_MOUSE Lon protease homolog, mitochondrial OS=Mus musculus OX=10090 GN=Lonp1 PE=1 SV=2	-0.22	-0.12	-0.03	0.06	0.15	-0.07	-0.02	0.08	-0.09	-0.09	-0.01	-0.18	0.06	-0.02	0.17	-0.03	0	-0.11	0.08	0.06	0.16	0.05	-0.02	-0.06	0.06	-0.08	0.07	0.09	0.07	0.11	0.04	0.1	0.11
Q11011	Npepps	Puromycin-sensitive aminopeptidase OS=Mus musculus OX=10090 GN=Npepps PE=1 SV=2	3.85e+18	0	263.906	53	37	672	0	37	1	2318.3	672	37	0	>sp|Q11011|PSA_MOUSE Puromycin-sensitive aminopeptidase OS=Mus musculus OX=10090 GN=Npepps PE=1 SV=2	-0.1	-0.16	0.1	0.08	0.07	-0.11	0.13	0.22	0.19	0.2	0.05	-0.08	-0.07	-0.1	-0.14	-0.02	-0.04	-0.36	-0.34	-0.02	0.18	0.01	-0.03	-0.25	-0.01	0.05	-0.08	0.14	-0.03	-0.1	0.06	0.11	0.16
E9QP49	Ehbp1l1	Isoform of Q99MS7, EH domain-binding protein 1-like protein 1 OS=Mus musculus OX=10090 GN=Ehbp1l1 PE=1 SV=1	-6.69e+18	0	263.7	40	44	295	4	44	1	1077.49	295	44	0	>tr|E9QP49|E9QP49_MOUSE Isoform of Q99MS7, EH domain-binding protein 1-like protein 1 OS=Mus musculus OX=10090 GN=Ehbp1l1 PE=1 SV=1	0.27	-0.06	0	-0.02	-0.11	0.13	-0.09	-0.03	-0.24	-0.09	-0.21	-0.23	-0.14	-0.41	-0.25	-0.02	-0.04	0.25	-0.03	-0.28	-0.02	0.07	-0.06	-0.24	-0.07	0.15	-0.21	-0.16	-0.19	-0.09	-0.03	-0.08	-0.03
Q01149	Col1a2	Collagen alpha-2(I) chain OS=Mus musculus OX=10090 GN=Col1a2 PE=1 SV=2	3.47e+18	0	263.676	35	33	952	31	33	1	3117.79	952	33	0	>sp|Q01149|CO1A2_MOUSE Collagen alpha-2(I) chain OS=Mus musculus OX=10090 GN=Col1a2 PE=1 SV=2	0.45	1.25	-0.19	-0.91	-0.18	0.05	-0.52	-0.9	-0.67	-0.44	-0.37	0.68	-0.85	-0.15	-0.12	-0.36	-0.65	-1.21	-0.84	0.07	-0.15	-0.5	0.27	-0.77	0.49	-0.08	0.85	0.02	0.26	-0.24	-0.47	-0.54	-0.5
P16015	Ca3	Carbonic anhydrase 3 OS=Mus musculus OX=10090 GN=Ca3 PE=1 SV=3	2.4e+18	0	261.302	91	23	2526	23	23	1	7635.47	2526	23	0	>sp|P16015|CAH3_MOUSE Carbonic anhydrase 3 OS=Mus musculus OX=10090 GN=Ca3 PE=1 SV=3	-0.55	-0.31	0.62	0.6	-0.15	-0.16	-0.33	-0.05	-0.18	-0.17	0.2	0.17	0.2	0.23	0.19	0.19	0.1	-0.97	-1.03	0.21	0.13	0.31	0.24	-0.21	0.08	0.32	-0.53	0.05	0.11	0.14	0.31	0.44	-0.16
P62631	Eef1a2	Elongation factor 1-alpha 2 OS=Mus musculus OX=10090 GN=Eef1a2 PE=1 SV=1	-7.76e+17	0	261.063	67	22	1473	12	12	1	4445.26	1473	22	10	>sp|P62631|EF1A2_MOUSE Elongation factor 1-alpha 2 OS=Mus musculus OX=10090 GN=Eef1a2 PE=1 SV=1	0.04	0.02	0.01	0.03	0.18	0.26	0.12	0.04	0.02	0.1	0.25	0.19	0.01	-0.2	0.01	0.16	0.06	0.34	0.37	-0.1	0.12	-0.13	-0.17	-0.05	-0.13	0.19	-0.17	0.07	0.09	0.07	0.21	0.14	0.13
Q61768	Kif5b	Kinesin-1 heavy chain OS=Mus musculus OX=10090 GN=Kif5b PE=1 SV=3	-6.5e+18	0	260.789	54	44	402	14	32	1	1375.25	402	44	13	>sp|Q61768|KINH_MOUSE Kinesin-1 heavy chain OS=Mus musculus OX=10090 GN=Kif5b PE=1 SV=3	0	0.03	0.01	-0.07	-0.07	0.1	-0.08	-0.1	-0.21	-0.15	-0.06	-0.1	-0.1	-0.14	-0.17	-0.06	0.01	0.13	0.2	-0.15	-0.02	-0.13	-0.14	-0.03	-0.08	-0.08	-0.14	-0.07	-0.12	-0.13	-0.06	-0.12	0.03
Q8CC88	Vwa8	von Willebrand factor A domain-containing protein 8 OS=Mus musculus OX=10090 GN=Vwa8 PE=1 SV=2	6.44e+17	0	260.559	36	54	423	5	54	1	1312.51	423	54	0	>sp|Q8CC88|VWA8_MOUSE von Willebrand factor A domain-containing protein 8 OS=Mus musculus OX=10090 GN=Vwa8 PE=1 SV=2	-0.39	-0.22	-0.03	0	0.15	-0.21	0	0.3	0.26	-0.02	-0.04	-0.25	0.18	0.11	0.23	0.15	0.05	-0.13	-0.02	-0.16	-0.04	-0.13	-0.07	-0.12	0.17	0.03	0.25	0.13	0.05	0.16	-0.05	0.2	0.27
P20152	Vim	Vimentin OS=Mus musculus OX=10090 GN=Vim PE=1 SV=3	8.64e+18	0	259.957	73	32	1287	2	27	1	4572.1	1287	32	3	>sp|P20152|VIME_MOUSE Vimentin OS=Mus musculus OX=10090 GN=Vim PE=1 SV=3	-0.11	-0.05	0.34	0.42	-0.45	0.11	0.03	-0.23	0.51	0.18	-0.17	0.84	0.17	0.64	0.62	0.55	0.34	-0.28	-0.17	0.37	-0.13	-0.07	0.01	0.64	0.07	0.44	0.72	0.06	-0.03	0.24	-0.25	-0.1	0.25
Q60932	Vdac1	Voltage-dependent anion-selective channel protein 1 OS=Mus musculus OX=10090 GN=Vdac1 PE=1 SV=3	-4.71e+18	0	258.786	81	20	2030	0	19	1	8761.9	2030	20	1	>sp|Q60932|VDAC1_MOUSE Voltage-dependent anion-selective channel protein 1 OS=Mus musculus OX=10090 GN=Vdac1 PE=1 SV=3	0.01	0.01	0.12	0.12	0.17	0.08	0.14	0.21	0.18	0.11	0.26	0.01	0.05	0.11	0.28	0.13	0.24	0.11	0.22	-0.15	0.04	0.08	0.07	0.06	0.26	0.21	0.06	0.25	0.13	0.04	0.2	0.19	0.17
O08749	Dld	Dihydrolipoyl dehydrogenase, mitochondrial OS=Mus musculus OX=10090 GN=Dld PE=1 SV=2	-1.81e+18	0	258.168	58	19	768	19	19	1	2945.76	768	19	0	>sp|O08749|DLDH_MOUSE Dihydrolipoyl dehydrogenase, mitochondrial OS=Mus musculus OX=10090 GN=Dld PE=1 SV=2	-0.25	-0.09	-0.04	0.01	0.11	-0.14	0.14	0.16	0.29	0.25	0.01	-0.16	0.13	0.21	0.3	0.09	0.01	-0.12	0	0	0.19	0.17	0.12	-0.14	0.09	-0.03	0.06	0.21	0.09	0.11	0.08	0.25	0.06
P06801	Me1	NADP-dependent malic enzyme OS=Mus musculus OX=10090 GN=Me1 PE=1 SV=2	1.26e+18	0	257.95	67	26	600	1	26	1	2147.52	600	26	0	>sp|P06801|MAOX_MOUSE NADP-dependent malic enzyme OS=Mus musculus OX=10090 GN=Me1 PE=1 SV=2	0.19	0.37	0.1	0.61	-0.08	0.47	-0.04	0.01	0.47	0.03	0.46	1.08	0.72	1.06	0.5	0.87	0.02	0.37	0.04	0.19	0.22	0.33	0.15	0.47	0.01	-0.01	-0.25	-0.24	0.17	0.79	0.17	0.65	-0.13
Q8CI94	Pygb	Glycogen phosphorylase, brain form OS=Mus musculus OX=10090 GN=Pygb PE=1 SV=3	8.49e+18	0	257.628	42	32	1542	15	15	1	5382.38	1542	32	0	>sp|Q8CI94|PYGB_MOUSE Glycogen phosphorylase, brain form OS=Mus musculus OX=10090 GN=Pygb PE=1 SV=3	-0.08	-0.21	0.09	0.05	-0.04	0.71	-0.01	-0.15	0.47	-0.23	-0.02	0.27	0.22	0.18	0.38	0.28	0.14	-0.12	-0.03	0.49	0.1	0.3	-0.02	0.24	-0.02	-0.04	-0.21	-0.1	0.03	0.25	-0.07	0.19	0.04
P26043	Rdx	Radixin OS=Mus musculus OX=10090 GN=Rdx PE=1 SV=3	-8.09e+18	0	257.335	58	36	715	11	23	1	2414.4	715	36	17	>sp|P26043|RADI_MOUSE Radixin OS=Mus musculus OX=10090 GN=Rdx PE=1 SV=3	0.11	0.15	0.08	0.06	0.06	0.07	-0.02	0.06	-0.04	-0.01	0.15	0.16	-0.01	-0.01	0.02	0.08	-0.02	0.06	0.07	0.03	-0.05	-0.02	-0.14	0.28	0.05	0	-0.21	0.09	0.03	0.11	-0.01	0.08	-0.06
A2AUC9	Klhl41	Kelch-like protein 41 OS=Mus musculus OX=10090 GN=Klhl41 PE=1 SV=1	-2.86e+18	0	256.927	63	29	994	29	29	1	3428.86	994	29	0	>sp|A2AUC9|KLH41_MOUSE Kelch-like protein 41 OS=Mus musculus OX=10090 GN=Klhl41 PE=1 SV=1	0.16	0.12	0.01	0.05	0.03	0.1	0.07	0.02	-0.16	-0.02	0.07	-0.11	-0.05	-0.19	-0.03	0.07	0.09	0.02	-0.01	-0.28	-0.08	-0.12	-0.15	-0.26	-0.01	0.41	-0.14	0.02	-0.05	-0.22	0.08	-0.03	0.1
P05202	Got2	Aspartate aminotransferase, mitochondrial OS=Mus musculus OX=10090 GN=Got2 PE=1 SV=1	7.99e+18	0	256.915	70	25	1240	25	25	1	4201.46	1240	25	0	>sp|P05202|AATM_MOUSE Aspartate aminotransferase, mitochondrial OS=Mus musculus OX=10090 GN=Got2 PE=1 SV=1	-0.4	-0.18	-0.04	0.03	0.2	-0.12	0.14	0.11	0.22	0.06	0.12	-0.12	-0.06	0.06	0.3	-0.01	0.07	-0.32	0.02	0.05	0.27	0	0.05	-0.13	0.27	0.03	0.02	0.31	0.12	-0.04	0.09	0.14	0.13
Q64737	Gart	Trifunctional purine biosynthetic protein adenosine-3 OS=Mus musculus OX=10090 GN=Gart PE=1 SV=3	-8.49e+18	0	256.738	51	34	437	13	34	1	1757.87	437	34	0	>sp|Q64737|PUR2_MOUSE Trifunctional purine biosynthetic protein adenosine-3 OS=Mus musculus OX=10090 GN=Gart PE=1 SV=3	0.03	-0.02	-0.05	-0.09	0.13	0.03	-0.01	0.12	0.06	0.11	0.05	-0.25	0.12	0.12	0.1	0	0.2	0.01	0.19	-0.17	-0.02	0.2	0.31	-0.01	0.14	-0.12	0.07	0.2	0.24	0.03	0.23	0.19	0.01
O08553	Dpysl2	Dihydropyrimidinase-related protein 2 OS=Mus musculus OX=10090 GN=Dpysl2 PE=1 SV=2	-6.83e+18	0	256.59	67	25	539	21	22	1	2201.86	539	25	4	>sp|O08553|DPYL2_MOUSE Dihydropyrimidinase-related protein 2 OS=Mus musculus OX=10090 GN=Dpysl2 PE=1 SV=2	0.01	-0.17	-0.1	-0.11	-0.21	-0.14	0.03	-0.2	0.07	-0.07	-0.06	0.13	-0.13	0.14	-0.04	-0.02	-0.02	-0.1	0.19	0	-0.16	0.03	0.15	-0.04	-0.05	-0.17	0.22	-0.13	0.09	-0.01	-0.03	-0.16	-0.12
Q8BSH3	Tpm1	Isoform of P58771, Tropomyosin alpha-1 chain OS=Mus musculus OX=10090 GN=Tpm1 PE=1 SV=1	-5.3e+18	0	255.681	75	39	9187	1	1	1	24292.7	9187	39	3	>tr|Q8BSH3|Q8BSH3_MOUSE Isoform of P58771, Tropomyosin alpha-1 chain OS=Mus musculus OX=10090 GN=Tpm1 PE=1 SV=1	0.26	0.18	-0.04	-0.06	-0.09	0.09	-0.13	0	-0.2	-0.06	0.05	-0.02	-0.06	-0.11	-0.04	0.08	0.08	0.29	0.13	-0.25	-0.38	-0.01	-0.01	-0.04	0.07	0.02	-0.6	-0.09	-0.08	-0.21	-0.03	0.04	-0.18
D3Z041	Acsl1	Isoform of P41216, Long-chain-fatty-acid--CoA ligase 1 OS=Mus musculus OX=10090 GN=Acsl1 PE=1 SV=1	-2.85e+18	0	255.171	56	34	833	0	30	1	2883.22	833	34	4	>tr|D3Z041|D3Z041_MOUSE Isoform of P41216, Long-chain-fatty-acid--CoA ligase 1 OS=Mus musculus OX=10090 GN=Acsl1 PE=1 SV=1	-0.25	-0.17	-0.13	-0.01	0.02	-0.05	0.1	0.09	0.52	0.02	0.03	-0.15	0.17	0.25	0.41	0.27	-0.04	-0.29	0	0.21	0.27	0.14	0.04	-0.04	0.08	0.26	0.14	0.04	0.04	0.18	0.03	0.19	0.13
Q9JLH8	Tmod4	Tropomodulin-4 OS=Mus musculus OX=10090 GN=Tmod4 PE=2 SV=1	-9.29e+17	0	254.356	70	20	786	7	19	1	3003.78	786	20	1	>sp|Q9JLH8|TMOD4_MOUSE Tropomodulin-4 OS=Mus musculus OX=10090 GN=Tmod4 PE=2 SV=1	0.14	0.21	0.05	-0.01	0.15	0.11	0.05	0.1	-0.05	0.12	0.17	0.05	0.03	0.04	0.01	-0.02	0.11	0.28	0.11	-0.32	-0.07	-0.07	-0.11	-0.05	0	-0.01	-0.44	0.09	-0.08	-0.18	0.08	0.1	-0.04
Q9Z2I9	Sucla2	Succinate--CoA ligase [ADP-forming] subunit beta, mitochondrial OS=Mus musculus OX=10090 GN=Sucla2 PE=1 SV=2	-4.97e+17	0	253.216	62	25	1196	25	25	1	4985.97	1196	25	0	>sp|Q9Z2I9|SUCB1_MOUSE Succinate--CoA ligase [ADP-forming] subunit beta, mitochondrial OS=Mus musculus OX=10090 GN=Sucla2 PE=1 SV=2	-0.07	-0.14	-0.08	-0.06	0.1	-0.07	0.08	0.11	0.07	0	0.07	-0.22	0.01	-0.27	-0.05	0.13	0.02	0.13	0.32	-0.25	0.05	0.09	-0.01	-0.32	0.17	0.13	-0.2	0.11	-0.02	-0.05	0.03	0.05	0.09
Q3U1J4	Ddb1	DNA damage-binding protein 1 OS=Mus musculus OX=10090 GN=Ddb1 PE=1 SV=2	2.86e+18	0	251.791	40	39	517	39	39	1	1765.73	517	39	0	>sp|Q3U1J4|DDB1_MOUSE DNA damage-binding protein 1 OS=Mus musculus OX=10090 GN=Ddb1 PE=1 SV=2	0.28	0.15	0.01	-0.09	0.03	-0.16	-0.03	0.01	-0.18	0.05	0.15	-0.12	-0.06	-0.32	-0.43	-0.02	-0.02	0.23	0.16	-0.23	0	-0.01	-0.14	-0.4	-0.04	0.23	-0.2	0.03	-0.02	-0.16	0.03	-0.06	0.14
P51174	Acadl	Long-chain specific acyl-CoA dehydrogenase, mitochondrial OS=Mus musculus OX=10090 GN=Acadl PE=1 SV=2	7.04e+18	0	250.665	43	18	886	1	2	1	3017.21	886	18	23	>sp|P51174|ACADL_MOUSE Long-chain specific acyl-CoA dehydrogenase, mitochondrial OS=Mus musculus OX=10090 GN=Acadl PE=1 SV=2	-0.63	-0.41	-0.34	-0.15	-0.17	-0.3	-0.1	0.1	0.14	-0.17	-0.18	-0.36	0.25	0.3	0.77	0.28	-0.07	-0.42	0.03	0.04	0.15	-0.06	-0.07	0.08	0.19	-0.05	-0.06	-0.09	-0.14	0.18	-0.33	0.12	-0.2
A2AQP0	Myh7b	Myosin-7B OS=Mus musculus OX=10090 GN=Myh7b PE=3 SV=1	7.63e+18	0	249.918	16	31	8810	16	16	1	24099.8	8810	31	0	>sp|A2AQP0|MYH7B_MOUSE Myosin-7B OS=Mus musculus OX=10090 GN=Myh7b PE=3 SV=1	-0.09	-0.1	0.3	0.2	0.54	0.25	0.64	0.14	0.41	0.66	0.19	-0.12	0.39	0.3	0.49	0.03	0.09	0.27	0.45	-0.19	0.17	-0.1	0.71	0.24	0.22	-0.25	-0.34	0.1	0.39	0	0.36	0	0.21
O70250	Pgam2	Phosphoglycerate mutase 2 OS=Mus musculus OX=10090 GN=Pgam2 PE=1 SV=3	8.58e+18	0	248.595	83	24	2129	19	19	1	6464.06	2129	24	7	>sp|O70250|PGAM2_MOUSE Phosphoglycerate mutase 2 OS=Mus musculus OX=10090 GN=Pgam2 PE=1 SV=3	0.1	0.11	0.13	0.08	0.04	0.05	-0.17	-0.01	-0.32	-0.2	0.12	0.02	-0.01	-0.06	-0.11	0.03	0.03	0.14	0.18	-0.25	-0.07	0.09	0.05	-0.21	-0.1	-0.03	-0.43	0.05	-0.01	-0.11	0.17	0.1	-0.06
Q9EQ20	Aldh6a1	Methylmalonate-semialdehyde dehydrogenase [acylating], mitochondrial OS=Mus musculus OX=10090 GN=Aldh6a1 PE=1 SV=1	-6.18e+18	0	248.492	69	25	619	20	25	1	2248.85	619	25	0	>sp|Q9EQ20|MMSA_MOUSE Methylmalonate-semialdehyde dehydrogenase [acylating], mitochondrial OS=Mus musculus OX=10090 GN=Aldh6a1 PE=1 SV=1	-0.34	-0.07	-0.07	-0.08	0.18	0.1	0.12	0.19	0.41	0.19	0.18	-0.1	0.29	0.37	0.29	0.2	0.05	-0.18	-0.01	0.12	0.14	0.16	0.08	0.18	0.15	-0.05	0.24	0.23	0.11	0.14	0.17	0.37	0.16
P08249	Mdh2	Malate dehydrogenase, mitochondrial OS=Mus musculus OX=10090 GN=Mdh2 PE=1 SV=3	4.19e+18	0	247.011	64	20	1782	9	20	1	6507.69	1782	20	0	>sp|P08249|MDHM_MOUSE Malate dehydrogenase, mitochondrial OS=Mus musculus OX=10090 GN=Mdh2 PE=1 SV=3	-0.12	-0.01	0.01	0.01	0.1	-0.01	0.03	-0.03	0.13	0.02	0.01	-0.19	-0.01	0.05	0.33	0.11	0.09	-0.02	0.18	-0.06	0.1	0.08	0.07	-0.04	0.15	0.22	0.09	0.13	0.09	0.02	0.09	0.14	0.12
Q9JKS4-6	Ldb3	Isoform of Q9JKS4, Isoform 6 of LIM domain-binding protein 3 OS=Mus musculus OX=10090 GN=Ldb3	2.36e+18	0	246.877	61	13	2132	0	1	1	9773.82	2132	13	0	>sp|Q9JKS4-6|LDB3_MOUSE Isoform of Q9JKS4, Isoform 6 of LIM domain-binding protein 3 OS=Mus musculus OX=10090 GN=Ldb3	0.39	0.48	0.3	0.07	0.13	0.42	0	0.16	0.05	-0.03	0.2	-0.08	0.04	-0.14	0.04	0.25	-0.06	0.2	0.31	-0.42	-0.12	-0.16	-0.22	0.28	0.14	0.39	-0.73	0.12	-0.09	-0.09	-0.04	0.07	-0.24
A0A0R4J083	Acadl	Isoform of P51174, Long-chain-specific acyl-CoA dehydrogenase, mitochondrial OS=Mus musculus OX=10090 GN=Acadl PE=1 SV=1	-2390000000000000	0	246.836	43	17	848	0	1	1	2936.39	848	17	0	>tr|A0A0R4J083|A0A0R4J083_MOUSE Isoform of P51174, Long-chain-specific acyl-CoA dehydrogenase, mitochondrial OS=Mus musculus OX=10090 GN=Acadl PE=1 SV=1	-4.62	-1.68	-2.01	NaN	2.16	NaN	NaN	2.52	2.46	2.68	2.58	NaN	-1.61	-1.53	NaN	-1.21	-1.79	NaN	NaN	NaN	-6.62	-4.6	-1.55	NaN	-1.53	-0.6	-1.23	2.25	NaN	2.53	NaN	2.26	2.52
Q8BFR5	Tufm	Elongation factor Tu, mitochondrial OS=Mus musculus OX=10090 GN=Tufm PE=1 SV=1	-3.49e+17	0	245.819	68	25	880	2	25	1	3161.22	880	25	0	>sp|Q8BFR5|EFTU_MOUSE Elongation factor Tu, mitochondrial OS=Mus musculus OX=10090 GN=Tufm PE=1 SV=1	-0.16	-0.13	-0.1	-0.17	0.08	-0.08	0.09	0.06	0.14	0.05	0.01	-0.25	0.02	0.01	0.14	0.05	0.03	-0.21	0.12	0.02	0.11	-0.02	-0.07	0.02	0.09	0.05	0.09	0.12	0.01	0.03	0	0.01	0.13
P58281-2	Opa1	Isoform of P58281, Isoform 2 of Dynamin-like 120 kDa protein, mitochondrial OS=Mus musculus OX=10090 GN=Opa1	-2.28e+18	0	245.746	47	38	503	0	38	1	1858.02	503	38	0	>sp|P58281-2|OPA1_MOUSE Isoform of P58281, Isoform 2 of Dynamin-like 120 kDa protein, mitochondrial OS=Mus musculus OX=10090 GN=Opa1	-0.07	-0.07	0.06	0.14	0.07	0.01	-0.01	0.07	0.14	0.02	-0.04	-0.19	0.16	0.15	0.4	0.15	-0.04	-0.02	-0.02	-0.01	0.21	0.19	0.07	-0.06	0.08	0.17	0.17	0.18	-0.05	0.1	0.03	0.13	0.11
Q9JKF1	Iqgap1	Ras GTPase-activating-like protein IQGAP1 OS=Mus musculus OX=10090 GN=Iqgap1 PE=1 SV=2	-8.44e+18	0	245.381	42	50	359	42	47	1	1305.12	359	50	3	>sp|Q9JKF1|IQGA1_MOUSE Ras GTPase-activating-like protein IQGAP1 OS=Mus musculus OX=10090 GN=Iqgap1 PE=1 SV=2	-0.13	0.21	-0.1	-0.07	-0.26	0.28	-0.12	-0.26	-0.24	-0.05	-0.24	0.47	-0.05	0.37	-0.01	-0.06	0.1	-0.13	-0.29	0.44	-0.11	-0.02	0.1	0.49	-0.12	-0.1	0.31	-0.04	0.03	0.45	0.05	0.06	-0.04
Q99JY0	Hadhb	Trifunctional enzyme subunit beta, mitochondrial OS=Mus musculus OX=10090 GN=Hadhb PE=1 SV=1	-3.36e+18	0	245.22	66	23	950	15	23	1	3322.54	950	23	0	>sp|Q99JY0|ECHB_MOUSE Trifunctional enzyme subunit beta, mitochondrial OS=Mus musculus OX=10090 GN=Hadhb PE=1 SV=1	-0.5	-0.27	-0.21	-0.11	-0.04	-0.12	0.13	0.23	0.42	0.2	-0.1	-0.35	0.41	0.48	0.8	0.28	-0.06	-0.23	0.12	0.1	0.14	0.04	0.05	-0.04	0.05	-0.13	0.09	0.02	0.06	0.18	-0.05	0.24	0
Q7TMM9	Tubb2a	Tubulin beta-2A chain OS=Mus musculus OX=10090 GN=Tubb2a PE=1 SV=1	-7.05e+18	0	244.398	67	21	984	1	1	1	3538.34	984	21	5	>sp|Q7TMM9|TBB2A_MOUSE Tubulin beta-2A chain OS=Mus musculus OX=10090 GN=Tubb2a PE=1 SV=1	-0.08	-0.44	-0.11	-0.06	-0.41	-0.1	-0.18	-0.2	-0.08	-0.19	-0.34	0.09	-0.32	-0.28	-0.15	-0.14	-0.18	0	0.28	0.05	-0.09	-0.23	-0.31	-0.25	-0.15	-0.08	-0.24	-0.22	-0.02	-0.16	-0.27	-0.26	-0.05
P26041	Msn	Moesin OS=Mus musculus OX=10090 GN=Msn PE=1 SV=3	-6.85e+18	0	243.087	63	36	610	24	24	1	1959.34	610	36	0	>sp|P26041|MOES_MOUSE Moesin OS=Mus musculus OX=10090 GN=Msn PE=1 SV=3	-0.12	-0.04	-0.05	0.11	-0.06	0.01	0.01	-0.16	0.24	-0.07	0	0.5	0.09	0.57	0.42	0.19	0.32	-0.07	-0.05	0.37	0.06	-0.05	-0.1	0.91	0.15	0.12	0.53	-0.11	0.07	0.69	-0.06	0.37	0.01
A2AN08-5	Ubr4	Isoform of A2AN08, Isoform 5 of E3 ubiquitin-protein ligase UBR4 OS=Mus musculus OX=10090 GN=Ubr4	8.1e+18	0	242.866	13	46	301	0	46	1	996.22	301	46	0	>sp|A2AN08-5|UBR4_MOUSE Isoform of A2AN08, Isoform 5 of E3 ubiquitin-protein ligase UBR4 OS=Mus musculus OX=10090 GN=Ubr4	0.1	-0.02	0.14	0.04	0	-0.12	0.05	0.15	-0.05	0.1	0.06	-0.13	0.05	-0.06	-0.23	-0.01	0.04	0.02	-0.02	-0.09	0.13	0.01	-0.1	-0.17	-0.05	0.01	-0.12	0.09	0.01	-0.06	0.08	0.02	0.05
Q8VDM4	Psmd2	26S proteasome non-ATPase regulatory subunit 2 OS=Mus musculus OX=10090 GN=Psmd2 PE=1 SV=1	5.7e+18	0	242.178	45	31	470	22	31	1	1665.35	470	31	0	>sp|Q8VDM4|PSMD2_MOUSE 26S proteasome non-ATPase regulatory subunit 2 OS=Mus musculus OX=10090 GN=Psmd2 PE=1 SV=1	0.09	0.06	0.03	-0.01	-0.11	0.07	-0.04	0	-0.08	-0.06	0.08	-0.08	0.02	-0.09	-0.12	-0.13	-0.09	0.18	0.2	-0.09	0	-0.1	-0.25	-0.07	-0.06	0.09	-0.12	-0.08	-0.08	-0.21	-0.06	-0.12	0.1
Q9D051	Pdhb	Pyruvate dehydrogenase E1 component subunit beta, mitochondrial OS=Mus musculus OX=10090 GN=Pdhb PE=1 SV=1	7.93e+18	0	242.17	64	16	984	16	16	1	3670.91	984	16	0	>sp|Q9D051|ODPB_MOUSE Pyruvate dehydrogenase E1 component subunit beta, mitochondrial OS=Mus musculus OX=10090 GN=Pdhb PE=1 SV=1	-0.18	-0.17	-0.01	0.05	0.11	0	0.02	0.08	0.18	0.03	0.05	-0.17	0.06	0.12	0.38	0.29	0.03	-0.1	0.08	-0.02	0.09	0.03	-0.06	0.11	0.11	0.07	-0.13	0.13	0.14	0.19	0.04	0.2	0.04
O35350	Capn1	Calpain-1 catalytic subunit OS=Mus musculus OX=10090 GN=Capn1 PE=1 SV=1	6.06e+18	0	241.718	55	36	666	36	36	1	2213.94	666	36	0	>sp|O35350|CAN1_MOUSE Calpain-1 catalytic subunit OS=Mus musculus OX=10090 GN=Capn1 PE=1 SV=1	0.19	0.19	0.06	-0.04	0.04	0.09	0.17	-0.01	0.13	0.26	0.19	-0.02	0.03	-0.06	-0.17	-0.06	0.06	0.21	0.11	-0.07	0.09	-0.25	-0.21	-0.1	0.07	0.17	-0.01	0.11	0.04	-0.01	0.17	-0.03	-0.04
Q9QUR6	Prep	Prolyl endopeptidase OS=Mus musculus OX=10090 GN=Prep PE=1 SV=1	6.17e+18	0	241.296	60	34	525	34	34	1	1705.85	525	34	0	>sp|Q9QUR6|PPCE_MOUSE Prolyl endopeptidase OS=Mus musculus OX=10090 GN=Prep PE=1 SV=1	0.09	-0.08	-0.03	-0.12	0.17	-0.27	0.13	0.06	0.13	0.22	0	-0.15	-0.25	-0.42	-0.36	-0.17	0.03	-0.07	-0.01	-0.35	0.02	-0.12	-0.16	-0.33	-0.01	0.09	-0.37	0.05	0	-0.34	0.07	-0.1	0.18
P17751	Tpi1	Triosephosphate isomerase OS=Mus musculus OX=10090 GN=Tpi1 PE=1 SV=4	-5.24e+18	0	240.881	74	19	2290	6	19	1	8854.22	2290	19	0	>sp|P17751|TPIS_MOUSE Triosephosphate isomerase OS=Mus musculus OX=10090 GN=Tpi1 PE=1 SV=4	0.14	0.21	0.18	0.12	0.08	0.07	0	0.05	-0.07	0.07	0.17	0.02	0.19	0.09	0.14	0.03	0.13	0.14	0.14	-0.21	-0.07	-0.1	-0.17	0.06	0.07	0.1	-0.21	0.08	-0.06	-0.14	0.09	0.05	-0.05
B2RQK7	Synpo2l	Isoform of Q8BWB1, Synaptopodin 2-like protein OS=Mus musculus OX=10090 GN=Synpo2l PE=1 SV=1	7.66e+18	0	238.713	44	25	508	1	6	1	2019.21	508	25	22	>tr|B2RQK7|B2RQK7_MOUSE Isoform of Q8BWB1, Synaptopodin 2-like protein OS=Mus musculus OX=10090 GN=Synpo2l PE=1 SV=1	0.01	0.04	0	-0.1	-0.15	-0.11	0.32	-0.02	0.16	0.25	0	-0.09	-0.12	-0.21	-0.26	-0.11	-0.07	0.04	-0.07	-0.15	0	0.09	0.03	-0.3	-0.02	-0.07	0.08	-0.02	0	-0.15	0.08	0.03	0.02
F8WID5	Tpm1	Isoform of P58771, Tropomyosin alpha-1 chain OS=Mus musculus OX=10090 GN=Tpm1 PE=1 SV=1	-1.28e+18	0	238.654	71	39	7985	1	1	1	20565.8	7985	39	39	>tr|F8WID5|F8WID5_MOUSE Isoform of P58771, Tropomyosin alpha-1 chain OS=Mus musculus OX=10090 GN=Tpm1 PE=1 SV=1	0.11	0.12	-0.01	-0.06	-0.06	0.03	-0.05	-0.01	-0.1	-0.05	0.01	-0.14	-0.1	-0.16	-0.12	-0.02	-0.02	0.11	0.04	-0.19	-0.2	0.03	0.05	-0.15	-0.04	-0.18	-0.41	0.02	-0.07	-0.2	-0.05	0.02	-0.09
P23116	Eif3a	Eukaryotic translation initiation factor 3 subunit A OS=Mus musculus OX=10090 GN=Eif3a PE=1 SV=5	-6.89e+18	0	238.652	33	38	499	38	38	1	1628.17	499	38	0	>sp|P23116|EIF3A_MOUSE Eukaryotic translation initiation factor 3 subunit A OS=Mus musculus OX=10090 GN=Eif3a PE=1 SV=5	-0.01	0.01	-0.03	-0.04	-0.07	-0.23	0.01	-0.03	-0.04	0.08	-0.07	-0.07	-0.03	-0.01	-0.16	-0.1	0.08	0.01	0.02	0	-0.02	-0.01	-0.05	-0.09	-0.07	-0.12	0.13	-0.11	0	-0.04	0.04	-0.02	0.05
Q1XH17	Trim72	Tripartite motif-containing protein 72 OS=Mus musculus OX=10090 GN=Trim72 PE=1 SV=1	9.15e+18	0	238.594	66	22	1044	22	22	1	3957.95	1044	22	0	>sp|Q1XH17|TRI72_MOUSE Tripartite motif-containing protein 72 OS=Mus musculus OX=10090 GN=Trim72 PE=1 SV=1	0.14	0.23	0.13	0.07	-0.07	-0.17	0.07	-0.18	-0.15	-0.04	-0.08	-0.12	-0.27	-0.4	-0.25	-0.01	0.05	-0.05	-0.11	-0.15	-0.02	-0.07	-0.09	-0.08	0.04	0.32	0.05	0	-0.17	-0.13	-0.08	-0.03	0.03
Q9D6F9	Tubb4a	Tubulin beta-4A chain OS=Mus musculus OX=10090 GN=Tubb4a PE=1 SV=3	-5.28e+18	0	238.443	63	19	1032	2	2	1	3743.28	1032	19	0	>sp|Q9D6F9|TBB4A_MOUSE Tubulin beta-4A chain OS=Mus musculus OX=10090 GN=Tubb4a PE=1 SV=3	-0.21	-1.54	0.18	-0.02	-0.21	-0.21	-0.33	0.15	0.27	-0.31	-0.45	-0.03	NaN	0.17	-0.22	NaN	-0.67	0.06	0.75	-0.33	-0.22	0.34	0.83	-0.84	-0.5	-0.5	-0.3	-0.36	0.23	-0.32	-0.37	-1.04	-0.07
Q8BY87	Usp47	Ubiquitin carboxyl-terminal hydrolase 47 OS=Mus musculus OX=10090 GN=Usp47 PE=1 SV=2	8.3e+18	0	238.147	40	41	290	1	41	1	1075.19	290	41	0	>sp|Q8BY87|UBP47_MOUSE Ubiquitin carboxyl-terminal hydrolase 47 OS=Mus musculus OX=10090 GN=Usp47 PE=1 SV=2	0.14	0.09	-0.04	-0.05	0.04	0.03	-0.02	0.03	-0.19	-0.15	-0.01	-0.26	-0.04	-0.22	-0.16	0.04	-0.13	-0.03	0.03	-0.13	0.05	0.05	0.01	-0.09	-0.03	-0.14	-0.08	-0.09	0.05	-0.11	0.06	-0.09	-0.01
Q9Z2I0	Letm1	Mitochondrial proton/calcium exchanger protein OS=Mus musculus OX=10090 GN=Letm1 PE=1 SV=1	3.34e+18	0	237.163	47	30	448	30	30	1	1642.47	448	30	0	>sp|Q9Z2I0|LETM1_MOUSE Mitochondrial proton/calcium exchanger protein OS=Mus musculus OX=10090 GN=Letm1 PE=1 SV=1	-0.4	-0.23	-0.26	-0.14	0.05	0.07	-0.05	-0.04	0.13	-0.19	-0.09	-0.22	0.09	0.04	0.4	0.14	-0.05	-0.26	0.11	0.11	0.06	0.01	-0.07	0.11	0.01	0.2	-0.07	-0.12	0.02	0.05	-0.09	0.07	0.06
Q99MN9	Pccb	Propionyl-CoA carboxylase beta chain, mitochondrial OS=Mus musculus OX=10090 GN=Pccb PE=1 SV=2	7.34e+18	0	236.651	54	20	447	0	20	1	1761.59	447	20	0	>sp|Q99MN9|PCCB_MOUSE Propionyl-CoA carboxylase beta chain, mitochondrial OS=Mus musculus OX=10090 GN=Pccb PE=1 SV=2	-0.27	-0.18	0.18	0.31	0.06	0.08	0.15	0.25	0.39	0.17	0.05	-0.13	0.34	0.3	0.4	0.41	0.1	-0.04	0.09	0.39	0.5	0.21	0.1	0.04	0.13	0.08	0.19	0.38	0.13	0.26	0.06	0.32	0.15
P58774	Tpm2	Tropomyosin beta chain OS=Mus musculus OX=10090 GN=Tpm2 PE=1 SV=1	-1.86e+18	0	236.286	68	32	6147	4	6	1	16267	6147	32	12	>sp|P58774|TPM2_MOUSE Tropomyosin beta chain OS=Mus musculus OX=10090 GN=Tpm2 PE=1 SV=1	-0.63	-0.44	0.5	0.49	0.3	0.12	0.26	0.14	0.21	0.08	0.37	0.32	0.12	0.21	0.6	-0.17	-0.31	-0.54	-0.33	0.47	0.19	-0.13	-0.05	-0.16	-0.15	0.11	-0.12	0.5	-0.19	0	-0.32	-0.17	0
P97927	Lama4	Laminin subunit alpha-4 OS=Mus musculus OX=10090 GN=Lama4 PE=1 SV=2	2.79e+18	0	236.015	25	34	383	34	34	1	1553.27	383	34	0	>sp|P97927|LAMA4_MOUSE Laminin subunit alpha-4 OS=Mus musculus OX=10090 GN=Lama4 PE=1 SV=2	-0.14	-0.19	0.06	0.12	-0.05	0.07	-0.02	-0.09	0.1	-0.17	-0.01	0.16	-0.05	0.02	0.24	0.26	-0.09	-0.06	0.12	0.12	-0.03	0.1	0.01	0.27	0.15	0.04	0.02	0.16	-0.01	0.12	-0.13	0.09	-0.1
Q9R0Y5-2	Ak1	Isoform of Q9R0Y5, Isoform 2 of Adenylate kinase isoenzyme 1 OS=Mus musculus OX=10090 GN=Ak1	-6.8e+18	0	235.421	79	21	2847	0	21	1	11530.6	2847	21	0	>sp|Q9R0Y5-2|KAD1_MOUSE Isoform of Q9R0Y5, Isoform 2 of Adenylate kinase isoenzyme 1 OS=Mus musculus OX=10090 GN=Ak1	0.12	0.09	0	0	0	0.01	-0.11	0.1	-0.08	0.05	-0.01	-0.05	0.02	0.18	-0.01	-0.09	0.06	0.08	-0.02	-0.12	0.08	0.13	0.18	-0.07	0.03	-0.11	0.06	0.16	-0.04	-0.17	0.08	0.09	0.18
A2A542	Cacnb1	Isoform of Q8R3Z5, Voltage-dependent L-type calcium channel subunit beta-1 OS=Mus musculus OX=10090 GN=Cacnb1 PE=1 SV=1	-4.82e+16	0	234.694	67	24	601	3	24	1	2255.47	601	24	0	>tr|A2A542|A2A542_MOUSE Isoform of Q8R3Z5, Voltage-dependent L-type calcium channel subunit beta-1 OS=Mus musculus OX=10090 GN=Cacnb1 PE=1 SV=1	0.19	0.23	0.1	0.06	0.03	0.18	0.01	0.03	-0.04	0.1	0.15	0.05	-0.02	-0.08	-0.05	0.05	0.01	0.28	0.2	-0.17	0.02	0	-0.01	0.1	0.02	0.11	-0.12	-0.04	-0.05	-0.17	0.06	-0.03	-0.07
A0A140LHH8	Tacc2	Isoform of Q9JJG0, Transforming acidic coiled-coil-containing protein 2 (Fragment) OS=Mus musculus OX=10090 GN=Tacc2 PE=1 SV=1	1.33e+18	0	232.914	32	35	227	1	1	1	843.74	227	35	0	>tr|A0A140LHH8|A0A140LHH8_MOUSE Isoform of Q9JJG0, Transforming acidic coiled-coil-containing protein 2 (Fragment) OS=Mus musculus OX=10090 GN=Tacc2 PE=1 SV=1	NaN	0.49	0.05	0.25	0.34	-0.02	NaN	NaN	-0.28	0.5	0.13	0.16	NaN	-0.06	0.16	NaN	NaN	0.44	NaN	NaN	NaN	0.12	0.12	NaN	NaN	NaN	-0.15	NaN	NaN	NaN	NaN	NaN	0.3
Q60864	Stip1	Stress-induced-phosphoprotein 1 OS=Mus musculus OX=10090 GN=Stip1 PE=1 SV=1	-4.47e+18	0	231.741	50	28	619	28	28	1	2133.19	619	28	0	>sp|Q60864|STIP1_MOUSE Stress-induced-phosphoprotein 1 OS=Mus musculus OX=10090 GN=Stip1 PE=1 SV=1	0.14	0.04	0.04	0.06	0.02	0.02	0.06	0.15	-0.08	-0.09	0	0.02	-0.04	-0.07	-0.05	0.08	0	0.19	0.14	-0.01	-0.03	-0.12	-0.02	0.07	-0.09	0	-0.21	-0.05	0.03	0.03	0.09	0.04	-0.03
Q3TXS7	Psmd1	26S proteasome non-ATPase regulatory subunit 1 OS=Mus musculus OX=10090 GN=Psmd1 PE=1 SV=1	5.46e+18	0	231.66	42	31	463	25	31	1	1729.63	463	31	0	>sp|Q3TXS7|PSMD1_MOUSE 26S proteasome non-ATPase regulatory subunit 1 OS=Mus musculus OX=10090 GN=Psmd1 PE=1 SV=1	0.07	-0.05	0.04	0.03	-0.08	0.12	0.01	0	-0.08	0.11	0.06	-0.04	0.03	-0.12	-0.04	0.01	-0.06	0.19	0.04	-0.13	0.02	-0.09	-0.14	-0.07	-0.04	0.1	-0.17	-0.07	-0.12	-0.14	-0.02	-0.08	0.06
Q91WD5	Ndufs2	NADH dehydrogenase [ubiquinone] iron-sulfur protein 2, mitochondrial OS=Mus musculus OX=10090 GN=Ndufs2 PE=1 SV=1	-9.05e+18	0	231.025	61	19	997	1	19	1	3560.96	997	19	0	>sp|Q91WD5|NDUS2_MOUSE NADH dehydrogenase [ubiquinone] iron-sulfur protein 2, mitochondrial OS=Mus musculus OX=10090 GN=Ndufs2 PE=1 SV=1	-0.37	-0.27	0.06	0.03	0.14	-0.03	0.08	0.04	0.09	0.12	0.06	-0.33	0.01	0.11	0.17	-0.04	-0.07	-0.13	0.13	-0.01	0.15	-0.03	-0.12	-0.09	0.1	0.23	0.09	0.15	0.13	0.07	0.1	0.18	0.16
P22599	Serpina1b	Alpha-1-antitrypsin 1-2 OS=Mus musculus OX=10090 GN=Serpina1b PE=1 SV=2	-3.58e+18	0	230.874	56	16	789	5	5	1	2978.13	789	16	0	>sp|P22599|A1AT2_MOUSE Alpha-1-antitrypsin 1-2 OS=Mus musculus OX=10090 GN=Serpina1b PE=1 SV=2	-0.09	-0.08	-0.02	0.03	-0.24	-0.23	-0.05	-0.36	-0.1	-0.31	0.16	0.48	-0.14	0.08	0.32	0.05	-0.05	0.36	0.05	0.53	0.14	-0.03	0.15	0.17	-0.04	-0.19	0.09	-0.06	-0.13	-0.01	-0.15	-0.12	-0.22
P08032	Spta1	Spectrin alpha chain, erythrocytic 1 OS=Mus musculus OX=10090 GN=Spta1 PE=1 SV=3	8.5e+18	0	230.722	27	42	178	41	41	1	742.8	178	42	0	>sp|P08032|SPTA1_MOUSE Spectrin alpha chain, erythrocytic 1 OS=Mus musculus OX=10090 GN=Spta1 PE=1 SV=3	-0.13	-0.5	0.01	-0.05	-0.46	-0.32	0.01	0.05	-0.19	-0.28	0.11	-0.25	0.27	0.39	0.08	-0.28	-0.16	0.34	0.04	0.36	-0.25	-0.01	0.16	-0.23	-0.28	-0.54	-0.63	-0.07	-0.25	-0.19	-0.29	-0.02	-0.13
E9Q6R7	Utrn	Utrophin OS=Mus musculus OX=10090 GN=Utrn PE=1 SV=1	8.99e+18	0	230.039	18	45	253	27	42	1	919.04	253	45	0	>tr|E9Q6R7|E9Q6R7_MOUSE Utrophin OS=Mus musculus OX=10090 GN=Utrn PE=1 SV=1	0.02	0.13	-0.05	0	-0.08	0.27	-0.14	-0.22	0.23	-0.13	-0.05	0.18	0.07	0.29	0.3	0.02	-0.02	-0.35	-0.04	0.32	-0.03	0.1	0.1	0.22	0.02	-0.17	0.19	-0.14	0.04	0.09	-0.2	0.03	-0.04
P11983	Tcp1	T-complex protein 1 subunit alpha OS=Mus musculus OX=10090 GN=Tcp1 PE=1 SV=3	1.64e+18	0	229.428	63	27	510	0	27	1	1685.93	510	27	0	>sp|P11983|TCPA_MOUSE T-complex protein 1 subunit alpha OS=Mus musculus OX=10090 GN=Tcp1 PE=1 SV=3	0.07	-0.02	0.09	0.02	0.02	0.02	0.11	-0.07	-0.01	0.05	0.13	0.18	-0.03	-0.02	-0.05	-0.01	0.16	0.16	0.16	-0.07	0	-0.07	0.02	0.07	0.07	0.09	-0.3	-0.14	-0.02	0.06	0.11	0.17	0.07
Q08642	Padi2	Protein-arginine deiminase type-2 OS=Mus musculus OX=10090 GN=Padi2 PE=1 SV=2	7.29e+18	0	228.941	43	24	605	24	24	1	2211.35	605	24	0	>sp|Q08642|PADI2_MOUSE Protein-arginine deiminase type-2 OS=Mus musculus OX=10090 GN=Padi2 PE=1 SV=2	-0.13	-0.07	0.14	0.15	0.42	0.08	-0.12	-0.21	0.3	0.17	0.42	0.15	-0.05	0.29	0.06	-0.03	-0.03	-0.71	-0.57	-0.19	0.09	-0.06	0.01	-0.28	0.15	0.42	0.86	0.29	-0.03	-0.16	0.06	-0.11	0.48
Q00897	Serpina1d	Alpha-1-antitrypsin 1-4 OS=Mus musculus OX=10090 GN=Serpina1d PE=1 SV=1	7.98e+18	0	228.501	59	18	748	7	7	1	2935.2	748	18	13	>sp|Q00897|A1AT4_MOUSE Alpha-1-antitrypsin 1-4 OS=Mus musculus OX=10090 GN=Serpina1d PE=1 SV=1	0.39	0.59	0.41	0.38	0.29	0.21	0.2	-0.03	0.11	-0.06	0.51	0.76	0.14	0.31	0.55	0.55	0.32	-0.08	-0.58	0	-0.34	-0.55	-0.25	0.57	0.28	0.2	0.62	0.17	0.28	0.52	0.17	0.29	0.14
E9Q452	Tpm1	Isoform of P58771, Tropomyosin alpha-1 chain OS=Mus musculus OX=10090 GN=Tpm1 PE=1 SV=1	-2.24e+18	0	227.947	71	37	8713	0	1	1	22760	8713	37	0	>tr|E9Q452|E9Q452_MOUSE Isoform of P58771, Tropomyosin alpha-1 chain OS=Mus musculus OX=10090 GN=Tpm1 PE=1 SV=1	NaN	-0.05	NaN	NaN	-0.17	NaN	NaN	NaN	NaN	NaN	NaN	NaN	NaN	NaN	NaN	NaN	NaN	NaN	NaN	NaN	NaN	NaN	NaN	NaN	NaN	NaN	NaN	NaN	NaN	NaN	NaN	NaN	NaN
Q9CWJ9	Atic	Bifunctional purine biosynthesis protein PURH OS=Mus musculus OX=10090 GN=Atic PE=1 SV=2	1.78e+18	0	227.692	65	26	390	26	26	1	1495.26	390	26	0	>sp|Q9CWJ9|PUR9_MOUSE Bifunctional purine biosynthesis protein PURH OS=Mus musculus OX=10090 GN=Atic PE=1 SV=2	-0.09	-0.15	-0.02	0.01	0.01	-0.19	0.1	0.14	0.08	0.23	0.03	0.1	0.04	0.08	0	-0.18	0.01	0.01	-0.09	-0.01	-0.04	0.3	0.46	0.06	-0.01	-0.09	-0.13	-0.07	-0.01	-0.07	0.07	0.09	0.12
Q76MZ3	Ppp2r1a	Serine/threonine-protein phosphatase 2A 65 kDa regulatory subunit A alpha isoform OS=Mus musculus OX=10090 GN=Ppp2r1a PE=1 SV=3	4.4e+18	0	227.443	52	26	501	14	19	1	1671.63	501	26	7	>sp|Q76MZ3|2AAA_MOUSE Serine/threonine-protein phosphatase 2A 65 kDa regulatory subunit A alpha isoform OS=Mus musculus OX=10090 GN=Ppp2r1a PE=1 SV=3	0.16	0.06	-0.18	-0.17	0	-0.15	-0.14	-0.01	-0.09	-0.02	0.02	-0.21	-0.26	-0.39	-0.32	-0.1	-0.08	0.12	0.11	-0.38	-0.11	-0.06	-0.19	-0.43	-0.09	0.02	-0.16	-0.05	-0.16	-0.27	-0.1	-0.19	0.02
P54822	Adsl	Adenylosuccinate lyase OS=Mus musculus OX=10090 GN=Adsl PE=1 SV=2	-3.78e+16	0	227.417	56	21	623	0	21	1	2647.82	623	21	0	>sp|P54822|PUR8_MOUSE Adenylosuccinate lyase OS=Mus musculus OX=10090 GN=Adsl PE=1 SV=2	0.19	0.14	0.02	-0.17	0.2	-0.2	-0.03	0.04	-0.19	-0.01	0.19	-0.34	-0.32	-0.44	-0.47	-0.03	-0.05	0.11	0.26	-0.75	-0.36	-0.33	-0.57	-0.06	-0.1	0.18	-0.32	0.13	0.05	-0.39	0.1	-0.19	0.07
Q91VA7	Idh3b	Isocitrate dehydrogenase [NAD] subunit, mitochondrial OS=Mus musculus OX=10090 GN=Idh3b PE=1 SV=1	1.43e+18	0	227.169	54	17	735	12	17	1	2649.45	735	17	0	>tr|Q91VA7|Q91VA7_MOUSE Isocitrate dehydrogenase [NAD] subunit, mitochondrial OS=Mus musculus OX=10090 GN=Idh3b PE=1 SV=1	-0.2	-0.16	0	0.02	0.19	-0.08	0.15	0.09	0.3	0.17	0.03	-0.2	0.14	0.03	0.31	0.15	-0.05	-0.13	0.09	-0.07	0.06	0.14	0.11	-0.01	0.13	0.12	0.03	0.18	0.06	0.01	0.05	0.09	0.11
A0A0A0MQA5	Tuba4a	Isoform of P68368, Tubulin alpha chain (Fragment) OS=Mus musculus OX=10090 GN=Tuba4a PE=1 SV=1	7.84e+18	0	227.076	60	20	911	0	6	1	3644.78	911	20	0	>tr|A0A0A0MQA5|A0A0A0MQA5_MOUSE Isoform of P68368, Tubulin alpha chain (Fragment) OS=Mus musculus OX=10090 GN=Tuba4a PE=1 SV=1	0.15	0.13	0	-0.08	-0.08	-0.13	0.19	-0.01	0.02	0.19	0.07	0.01	-0.07	0.01	-0.21	-0.15	0.08	0.19	0.18	-0.21	0.01	-0.05	0.09	-0.21	0.04	-0.01	0.32	0.03	0.06	-0.05	0.14	0.06	0.16
O88685	Psmc3	26S proteasome regulatory subunit 6A OS=Mus musculus OX=10090 GN=Psmc3 PE=1 SV=2	3.37e+18	0	226.385	64	23	543	0	23	1	1966.47	543	23	0	>sp|O88685|PRS6A_MOUSE 26S proteasome regulatory subunit 6A OS=Mus musculus OX=10090 GN=Psmc3 PE=1 SV=2	0.11	-0.04	0.11	0.07	-0.12	0.05	0.05	0.04	0.01	0.03	0.06	-0.01	0.05	-0.03	0.03	-0.03	-0.1	0.18	0.13	-0.04	-0.01	-0.07	-0.1	0.1	-0.02	0.11	-0.15	0.01	-0.06	-0.08	0.01	-0.03	0.03
Q8BMF4	Dlat	Dihydrolipoyllysine-residue acetyltransferase component of pyruvate dehydrogenase complex, mitochondrial OS=Mus musculus OX=10090 GN=Dlat PE=1 SV=2	3.27e+18	0	226.247	38	18	847	18	18	1	3141.88	847	18	0	>sp|Q8BMF4|ODP2_MOUSE Dihydrolipoyllysine-residue acetyltransferase component of pyruvate dehydrogenase complex, mitochondrial OS=Mus musculus OX=10090 GN=Dlat PE=1 SV=2	-0.19	-0.05	-0.01	-0.08	0.14	-0.14	0.13	0.04	0.24	0.16	0.08	-0.05	0.13	0.16	0.19	0.19	0.13	-0.17	0.19	0	0.17	0.12	0.1	-0.2	0.2	0.03	0.2	0.17	0.21	0.15	0.17	0.19	0.22
Q8BKC5	Ipo5	Importin-5 OS=Mus musculus OX=10090 GN=Ipo5 PE=1 SV=3	5.48e+18	0	226.043	41	30	328	3	29	1	1299.32	328	30	1	>sp|Q8BKC5|IPO5_MOUSE Importin-5 OS=Mus musculus OX=10090 GN=Ipo5 PE=1 SV=3	0.14	0.07	-0.09	-0.12	0	-0.22	0	-0.01	-0.23	0.05	0	-0.27	-0.15	-0.36	-0.48	-0.04	-0.1	0.2	0.12	-0.21	-0.07	0.01	-0.36	-0.52	-0.12	0.1	-0.47	-0.07	-0.06	-0.17	0	-0.16	0.05
P08113	Hsp90b1	Endoplasmin OS=Mus musculus OX=10090 GN=Hsp90b1 PE=1 SV=2	7.81e+18	0	225.631	45	30	474	13	29	1	1685.94	474	30	0	>sp|P08113|ENPL_MOUSE Endoplasmin OS=Mus musculus OX=10090 GN=Hsp90b1 PE=1 SV=2	0.06	-0.01	-0.14	-0.06	-0.25	-0.16	-0.06	-0.15	0	-0.01	-0.19	0.15	-0.14	0.04	-0.05	0.01	0.17	-0.01	-0.11	0.18	-0.08	0.18	0.24	0.21	-0.14	-0.05	0.12	-0.24	-0.09	0.2	-0.02	-0.01	-0.04
Q8QZT1	Acat1	Acetyl-CoA acetyltransferase, mitochondrial OS=Mus musculus OX=10090 GN=Acat1 PE=1 SV=1	8.77e+18	0	225.535	59	16	651	16	16	1	2567.98	651	16	0	>sp|Q8QZT1|THIL_MOUSE Acetyl-CoA acetyltransferase, mitochondrial OS=Mus musculus OX=10090 GN=Acat1 PE=1 SV=1	-0.25	-0.17	-0.17	-0.09	0.08	-0.08	0.2	0.12	0.58	0.39	0	-0.14	0.25	0.33	0.65	0.31	0.09	-0.06	0.26	0.1	0.22	0.02	-0.04	0.11	0.23	0.09	-0.05	0.08	0.05	0.17	-0.01	0.34	0.08
Q3TVI8	Pbxip1	Pre-B-cell leukemia transcription factor-interacting protein 1 OS=Mus musculus OX=10090 GN=Pbxip1 PE=1 SV=2	-6.32e+18	0	225.101	46	26	643	20	26	1	2390.58	643	26	0	>sp|Q3TVI8|PBIP1_MOUSE Pre-B-cell leukemia transcription factor-interacting protein 1 OS=Mus musculus OX=10090 GN=Pbxip1 PE=1 SV=2	0.25	0.3	0.14	0.01	-0.15	-0.33	0.03	0.05	-0.1	-0.06	0.07	-0.08	-0.27	-0.02	-0.27	-0.35	-0.17	0.23	0.31	-0.16	-0.02	-0.05	-0.01	-0.2	-0.22	0.02	0.09	-0.17	-0.06	-0.15	0.06	-0.06	0.07
Q6IMF0	Krt87	Keratin, type II cuticular 87 OS=Mus musculus OX=10090 GN=Krt87 PE=2 SV=2	-2.82e+18	0	224.269	57	32	1040	8	8	1	3462.77	1040	32	28	>sp|Q6IMF0|KRT87_MOUSE Keratin, type II cuticular 87 OS=Mus musculus OX=10090 GN=Krt87 PE=2 SV=2	-0.34	1.01	-0.03	0.07	-0.64	0.48	0.55	-0.57	-0.59	-0.84	0.7	1.4	0.33	-0.47	0.77	-0.74	-0.73	0.69	0.36	-0.35	-0.18	-1.22	-0.87	0.88	1.38	-0.54	0.29	0.74	1.03	-0.25	0.16	-0.63	-0.11
P07901	Hsp90aa1	Heat shock protein HSP 90-alpha OS=Mus musculus OX=10090 GN=Hsp90aa1 PE=1 SV=4	-8.23e+18	0	224.26	50	31	817	16	18	1	2801.69	817	31	0	>sp|P07901|HS90A_MOUSE Heat shock protein HSP 90-alpha OS=Mus musculus OX=10090 GN=Hsp90aa1 PE=1 SV=4	-0.15	-0.25	-0.08	0.08	-0.08	0.16	0.01	-0.06	0.21	-0.01	-0.05	0.16	0.02	0.32	0.08	0.16	0	-0.16	-0.24	0.35	0.25	0.12	0.15	0.15	-0.13	-0.02	0.22	-0.21	0	0.47	-0.02	0.07	0.04
Q07417	Acads	Short-chain specific acyl-CoA dehydrogenase, mitochondrial OS=Mus musculus OX=10090 GN=Acads PE=1 SV=2	-2.63e+18	0	224.163	56	17	569	17	17	1	2172.51	569	17	0	>sp|Q07417|ACADS_MOUSE Short-chain specific acyl-CoA dehydrogenase, mitochondrial OS=Mus musculus OX=10090 GN=Acads PE=1 SV=2	-0.2	-0.01	-0.04	0.11	0.22	0.09	0.23	0.35	0.41	0.22	-0.01	-0.06	0.38	0.49	0.8	0.46	0.06	-2.1	-1.85	0.22	0.16	0.32	0.3	0.01	0.14	0.17	0.49	0.14	0.27	0.51	0.22	0.54	0.29
Q6NZJ6	Eif4g1	Eukaryotic translation initiation factor 4 gamma 1 OS=Mus musculus OX=10090 GN=Eif4g1 PE=1 SV=1	5.97e+18	0	224.109	29	37	492	0	32	1	1692.43	492	37	6	>sp|Q6NZJ6|IF4G1_MOUSE Eukaryotic translation initiation factor 4 gamma 1 OS=Mus musculus OX=10090 GN=Eif4g1 PE=1 SV=1	0.16	0.11	0.14	0.1	-0.04	0.02	-0.02	0.07	-0.07	0.04	0.15	-0.02	0.08	-0.12	-0.05	0.04	-0.02	0.11	0.04	-0.06	0.05	0.03	-0.14	-0.08	0.03	0.18	-0.11	0.04	0.01	-0.07	0.03	-0.02	0.04
P27773	Pdia3	Protein disulfide-isomerase A3 OS=Mus musculus OX=10090 GN=Pdia3 PE=1 SV=2	-2.26e+18	0	222.556	60	26	569	22	26	1	1991.96	569	26	0	>sp|P27773|PDIA3_MOUSE Protein disulfide-isomerase A3 OS=Mus musculus OX=10090 GN=Pdia3 PE=1 SV=2	-0.1	0.1	-0.2	-0.06	-0.3	0.02	-0.15	-0.17	-0.06	-0.14	-0.34	0.23	-0.15	0.01	-0.05	0.2	0.09	-0.06	-0.15	0.24	-0.08	0.06	0.08	0.22	-0.16	-0.04	0.16	-0.31	-0.06	0.28	-0.08	0.05	-0.07
Q9CPY7	Lap3	Cytosol aminopeptidase OS=Mus musculus OX=10090 GN=Lap3 PE=1 SV=3	-7.38e+18	0	222.476	64	25	437	0	25	1	1545.85	437	25	0	>sp|Q9CPY7|AMPL_MOUSE Cytosol aminopeptidase OS=Mus musculus OX=10090 GN=Lap3 PE=1 SV=3	-0.06	-0.03	-0.02	0	0.07	-0.01	0.22	0.02	0.03	0.13	0	-0.02	0.01	-0.12	-0.16	0.09	0.08	-0.02	0.13	0.14	-0.05	0.12	-0.07	-0.22	-0.06	-0.06	-0.14	-0.03	0.03	-0.07	0.05	-0.02	-0.01
A2AVJ7	Rrbp1	Isoform of Q99PL5, Ribosome-binding protein 1 OS=Mus musculus OX=10090 GN=Rrbp1 PE=1 SV=1	-4.02e+18	0	221.443	48	43	277	0	43	1	954.99	277	43	0	>tr|A2AVJ7|A2AVJ7_MOUSE Isoform of Q99PL5, Ribosome-binding protein 1 OS=Mus musculus OX=10090 GN=Rrbp1 PE=1 SV=1	-0.02	0.21	-0.13	-0.05	-0.22	0.01	-0.23	-0.35	-0.1	-0.28	-0.42	0.15	-0.17	-0.13	-0.05	0.05	0.04	-0.23	-0.4	0.22	-0.24	-0.05	0.02	0.06	-0.14	0.05	0.11	-0.41	-0.05	0.15	-0.13	-0.08	-0.1
P14733	Lmnb1	Lamin-B1 OS=Mus musculus OX=10090 GN=Lmnb1 PE=1 SV=3	1.75e+18	0	221.429	60	34	544	31	31	1	1735.28	544	34	2	>sp|P14733|LMNB1_MOUSE Lamin-B1 OS=Mus musculus OX=10090 GN=Lmnb1 PE=1 SV=3	0.04	0.12	-0.08	-0.05	0.08	-0.09	0.1	-0.11	0.09	0.08	0.14	0.28	0.12	0.31	0.28	0	0.11	0.07	0	0.13	-0.1	-0.11	-0.12	0.79	0.26	-0.09	0.14	0.1	0.03	0.41	-0.07	0.16	-0.13
Q61598	Gdi2	Rab GDP dissociation inhibitor beta OS=Mus musculus OX=10090 GN=Gdi2 PE=1 SV=1	3.11e+18	0	221.053	69	27	649	0	22	1	2679.1	649	27	6	>sp|Q61598|GDIB_MOUSE Rab GDP dissociation inhibitor beta OS=Mus musculus OX=10090 GN=Gdi2 PE=1 SV=1	0.37	0.37	0.18	0.25	-0.15	0.03	0.01	-0.21	0.01	0.03	0.19	0.3	0.09	0.06	0.19	-0.03	-0.11	0.19	0.26	0.11	0.07	-0.25	-0.29	0.36	0.17	0.43	-0.18	0.1	-0.21	-0.1	-0.17	-0.06	0.03
P58774-2	Tpm2	Isoform of P58774, Isoform 2 of Tropomyosin beta chain OS=Mus musculus OX=10090 GN=Tpm2	2.82e+18	0	220.834	67	30	5394	2	5	1	13823.7	5394	30	0	>sp|P58774-2|TPM2_MOUSE Isoform of P58774, Isoform 2 of Tropomyosin beta chain OS=Mus musculus OX=10090 GN=Tpm2	-0.69	-1.09	-0.52	-0.09	-0.36	-0.29	-0.04	-0.47	0.4	-0.14	0.08	0.38	-0.17	0.2	0.01	-0.04	-0.48	0.43	0.16	-0.02	-0.28	0.19	0.15	-0.22	-0.25	0.02	-0.11	-0.18	-0.15	-0.13	-0.15	-0.56	-0.31
P68369	Tuba1a	Tubulin alpha-1A chain OS=Mus musculus OX=10090 GN=Tuba1a PE=1 SV=1	-8.07e+17	0	220.526	57	21	887	0	4	1	3531.05	887	21	20	>sp|P68369|TBA1A_MOUSE Tubulin alpha-1A chain OS=Mus musculus OX=10090 GN=Tuba1a PE=1 SV=1	0.18	-0.02	0.04	0.02	-0.1	0.05	0.07	-0.07	0.17	0.16	-0.01	0.11	-0.08	0.03	-0.12	0.06	0.02	0.06	0.18	-0.1	-0.05	0.04	0.03	-0.21	0	0.12	0.07	-0.07	-0.01	0.02	0.1	-0.02	0.02
P02088	Hbb-b1	Hemoglobin subunit beta-1 OS=Mus musculus OX=10090 GN=Hbb-b1 PE=1 SV=2	-2.78e+17	0	220.517	91	18	3198	3	3	1	11441.4	3198	18	18	>sp|P02088|HBB1_MOUSE Hemoglobin subunit beta-1 OS=Mus musculus OX=10090 GN=Hbb-b1 PE=1 SV=2	-0.82	-0.54	-0.31	-0.35	-0.65	-0.02	-0.25	0.13	-0.44	-0.59	-0.22	-0.65	-0.36	0.17	0.04	-0.5	-0.26	0.92	0.06	0.85	0.03	0.23	0.46	-0.43	-0.88	-0.61	-0.55	0.35	-0.57	-0.43	-0.67	-0.3	-0.66
P47934	Crat	Carnitine O-acetyltransferase OS=Mus musculus OX=10090 GN=Crat PE=1 SV=3	-5.56e+18	0	219.929	43	23	637	0	23	1	1971.5	637	23	0	>sp|P47934|CACP_MOUSE Carnitine O-acetyltransferase OS=Mus musculus OX=10090 GN=Crat PE=1 SV=3	-0.16	-0.15	-0.15	-0.17	0.21	-0.01	0.23	-0.1	0.22	0.19	0.12	-0.2	0.18	0.05	0.27	0.18	0	-0.39	-0.18	-0.01	0.2	0.17	0.08	0	0.3	-0.08	-0.13	0.18	0.16	0.21	0.11	0.24	0.19
Q6GQT9	Nomo1	Nodal modulator 1 OS=Mus musculus OX=10090 GN=Nomo1 PE=1 SV=1	2.62e+18	0	219.22	45	35	278	35	35	1	1071.44	278	35	0	>sp|Q6GQT9|NOMO1_MOUSE Nodal modulator 1 OS=Mus musculus OX=10090 GN=Nomo1 PE=1 SV=1	0.2	0.14	0.08	0.09	0.08	0.32	0.21	0.16	0.12	0.2	0.08	0.09	0.09	-0.03	-0.06	0.09	-0.03	0.12	0.19	0.13	0.04	0.02	0.1	0.16	-0.03	0.11	0.04	0.07	0.05	-0.01	0.15	0.06	0.15
A0A0R4J0X5	Serpina1c	Isoform of Q00896, Alpha-1-antitrypsin 1-3 OS=Mus musculus OX=10090 GN=Serpina1c PE=1 SV=1	-3.56e+17	0	219.024	59	17	911	1	1	1	3469.55	911	17	7	>tr|A0A0R4J0X5|A0A0R4J0X5_MOUSE Isoform of Q00896, Alpha-1-antitrypsin 1-3 OS=Mus musculus OX=10090 GN=Serpina1c PE=1 SV=1	0.12	-0.09	0.08	0.01	-0.26	-0.22	-0.29	-0.34	-0.21	-0.37	-0.09	0.28	-0.34	-0.21	0.01	0.07	0.03	-0.03	-0.33	0.36	-0.08	0.17	0.23	-0.12	-0.3	-0.06	0.09	-0.15	-0.28	-0.14	-0.4	-0.39	-0.24
P07759	Serpina3k	Serine protease inhibitor A3K OS=Mus musculus OX=10090 GN=Serpina3k PE=1 SV=2	-1.94e+18	0	218.28	44	19	1163	5	5	1	4552.56	1163	19	17	>sp|P07759|SPA3K_MOUSE Serine protease inhibitor A3K OS=Mus musculus OX=10090 GN=Serpina3k PE=1 SV=2	-0.26	-0.45	-0.57	-0.58	-0.51	-0.9	-0.92	-0.97	-1.23	-1.58	-1.07	-0.51	-1.03	-1.04	-0.93	-0.57	-0.43	0.61	0.38	0.36	-0.06	0.47	0.21	-1.18	-1.18	-0.62	-0.25	-0.79	-0.68	-0.5	-0.93	-0.93	-0.32
E9Q0S6	Tns1	Tensin 1 OS=Mus musculus OX=10090 GN=Tns1 PE=1 SV=1	-1.65e+18	0	217.527	29	36	257	0	34	1	892.64	257	36	2	>tr|E9Q0S6|E9Q0S6_MOUSE Tensin 1 OS=Mus musculus OX=10090 GN=Tns1 PE=1 SV=1	-0.14	-0.03	0.06	-0.02	0.06	0.05	0	-0.18	-0.09	0	0.15	0.07	-0.04	0.13	0.08	-0.06	-0.16	-0.17	-0.12	0.08	0.14	-0.1	0.06	-0.02	0.17	0.04	0.17	0.04	0.02	-0.06	-0.07	0.07	-0.11
Q9CZU6	Cs	Citrate synthase, mitochondrial OS=Mus musculus OX=10090 GN=Cs PE=1 SV=1	8.28e+18	0	217.523	51	17	1382	10	10	1	4951.62	1382	17	12	>sp|Q9CZU6|CISY_MOUSE Citrate synthase, mitochondrial OS=Mus musculus OX=10090 GN=Cs PE=1 SV=1	-0.43	-0.49	-0.53	-0.54	-0.31	-0.41	-0.23	0.03	-0.26	-0.27	-0.47	-0.63	-0.29	-0.41	-0.04	-0.05	-0.03	-0.05	0.19	-0.08	0.08	0.08	0.05	0.17	0.16	-0.27	-0.31	0.12	0.08	-0.01	0.05	0.12	0.04
A0A0R4J1N7	Ank1	Isoform of Q02357, Ankyrin-1 OS=Mus musculus OX=10090 GN=Ank1 PE=1 SV=1	8.98e+18	0	217.397	32	40	411	0	34	1	1611.26	411	40	2	>tr|A0A0R4J1N7|A0A0R4J1N7_MOUSE Isoform of Q02357, Ankyrin-1 OS=Mus musculus OX=10090 GN=Ank1 PE=1 SV=1	0.11	0.14	0.1	0.17	0.02	0.08	0.02	0.21	-0.07	0.07	0.14	-0.14	0.03	0.12	0.1	-0.14	0.08	0.28	0.05	0.18	-0.06	0.02	0.17	-0.07	-0.24	0.11	-0.02	0.18	0.06	-0.09	0.05	0.03	-0.04
P97443	Smyd1	Histone-lysine N-methyltransferase Smyd1 OS=Mus musculus OX=10090 GN=Smyd1 PE=1 SV=3	1.52e+18	0	217.271	59	21	952	0	21	1	3946.41	952	21	0	>sp|P97443|SMYD1_MOUSE Histone-lysine N-methyltransferase Smyd1 OS=Mus musculus OX=10090 GN=Smyd1 PE=1 SV=3	0.11	0.1	0.24	0.25	0.32	0.04	0.16	0.4	0.08	0.34	0.28	0.02	0.1	0.02	-0.16	0.13	0.19	0.17	0.19	-0.24	0.16	0.12	0.05	-0.22	0.09	0.13	0.22	0.31	0.19	0.01	0.28	0.22	0.25
P10630-2	Eif4a2	Isoform of P10630, Isoform 2 of Eukaryotic initiation factor 4A-II OS=Mus musculus OX=10090 GN=Eif4a2	2.03e+18	0	215.229	62	21	598	0	12	1	2169.67	598	21	9	>sp|P10630-2|IF4A2_MOUSE Isoform of P10630, Isoform 2 of Eukaryotic initiation factor 4A-II OS=Mus musculus OX=10090 GN=Eif4a2	0.17	0.03	-0.01	-0.03	0.09	-0.13	0.06	0.1	-0.07	0.16	0.02	-0.13	-0.17	-0.29	-0.33	0.18	0.04	-0.01	-0.05	-0.23	0.09	0.17	-0.04	-0.37	-0.07	0.25	-0.1	0	-0.12	-0.21	0.01	-0.14	-0.06
P28271	Aco1	Cytoplasmic aconitate hydratase OS=Mus musculus OX=10090 GN=Aco1 PE=1 SV=3	3.86e+18	0	214.265	45	32	450	31	31	1	1568	450	32	1	>sp|P28271|ACOC_MOUSE Cytoplasmic aconitate hydratase OS=Mus musculus OX=10090 GN=Aco1 PE=1 SV=3	0.11	0.01	-0.02	0.04	0.01	0.08	0.11	0.01	0.17	0.13	-0.04	0.05	0.07	0.21	0.09	0.28	0.01	-0.16	-0.2	0.3	0.09	0.11	0.24	-0.08	-0.08	-0.05	0.19	0	0.11	0.1	0.09	0.09	-0.11
Q9CZ13	Uqcrc1	Cytochrome b-c1 complex subunit 1, mitochondrial OS=Mus musculus OX=10090 GN=Uqcrc1 PE=1 SV=2	2.24e+18	0	213.586	55	19	1348	9	18	1	5084.23	1348	19	1	>sp|Q9CZ13|QCR1_MOUSE Cytochrome b-c1 complex subunit 1, mitochondrial OS=Mus musculus OX=10090 GN=Uqcrc1 PE=1 SV=2	-0.27	-0.14	-0.02	0.02	0.16	-0.11	0.07	0.04	0.14	0	-0.01	-0.23	-0.04	0.05	0.28	0.12	0.02	-0.25	0.08	-0.01	0.17	0.05	0.04	-0.1	0.12	0.12	0.04	0.16	0.1	0.09	0.06	0.17	0.16
D3YU08	Synpo2l	Isoform of Q8BWB1, Synaptopodin 2-like protein OS=Mus musculus OX=10090 GN=Synpo2l PE=1 SV=1	6.64e+18	0	213.299	45	20	416	1	1	1	1791.2	416	20	0	>tr|D3YU08|D3YU08_MOUSE Isoform of Q8BWB1, Synaptopodin 2-like protein OS=Mus musculus OX=10090 GN=Synpo2l PE=1 SV=1	-0.17	-0.09	-0.5	-0.01	-0.43	-0.32	0.12	-0.79	0.07	0.18	-0.21	-0.13	-0.6	-0.02	-0.47	-0.49	-0.33	0.08	0.19	0.64	0.24	-0.05	0.41	1.05	-0.45	-0.37	0.32	-0.65	0.02	-0.68	-0.02	-0.44	NaN
Q99KQ4	Nampt	Nicotinamide phosphoribosyltransferase OS=Mus musculus OX=10090 GN=Nampt PE=1 SV=1	5.97e+18	0	212.984	61	25	456	25	25	1	1807.14	456	25	0	>sp|Q99KQ4|NAMPT_MOUSE Nicotinamide phosphoribosyltransferase OS=Mus musculus OX=10090 GN=Nampt PE=1 SV=1	-0.02	0.08	0.09	0.03	0.14	0.06	0.09	0.03	0.08	0.02	0.17	-0.02	0.01	0.02	0.09	0.19	-0.04	-0.07	0.05	-0.09	-0.03	0.01	-0.09	0.09	0	0.17	0.12	0.06	0.09	-0.01	0.05	0.03	-0.01
P52825	Cpt2	Carnitine O-palmitoyltransferase 2, mitochondrial OS=Mus musculus OX=10090 GN=Cpt2 PE=1 SV=2	-6.44e+17	0	212.913	50	24	460	15	24	1	1641.93	460	24	0	>sp|P52825|CPT2_MOUSE Carnitine O-palmitoyltransferase 2, mitochondrial OS=Mus musculus OX=10090 GN=Cpt2 PE=1 SV=2	-0.29	-0.11	-0.18	-0.06	0.01	-0.13	0.21	0.17	0.57	0.22	-0.08	-0.16	0.34	0.34	0.47	0.25	0.1	-0.24	0.13	0.12	0.14	0.12	0.06	0.09	0.07	-0.2	0.15	0.04	0.08	0.16	0.03	0.25	0.08
Q9WVK4	Ehd1	EH domain-containing protein 1 OS=Mus musculus OX=10090 GN=Ehd1 PE=1 SV=1	6.78e+18	0	212.708	65	29	402	20	20	1	1402.87	402	29	9	>sp|Q9WVK4|EHD1_MOUSE EH domain-containing protein 1 OS=Mus musculus OX=10090 GN=Ehd1 PE=1 SV=1	-0.16	-0.12	-0.09	-0.03	0.03	0.01	-0.03	-0.14	0.17	0	-0.01	-0.01	0.06	0.19	0.18	0.18	0.05	-0.11	0	0.13	0.1	-0.01	0.11	0.13	-0.03	-0.09	-0.01	-0.05	-0.08	0.14	-0.14	0.02	-0.2
Q99MR8	Mccc1	Methylcrotonoyl-CoA carboxylase subunit alpha, mitochondrial OS=Mus musculus OX=10090 GN=Mccc1 PE=1 SV=2	7.06e+18	0	212.073	55	27	319	13	27	1	1203.54	319	27	0	>sp|Q99MR8|MCCA_MOUSE Methylcrotonoyl-CoA carboxylase subunit alpha, mitochondrial OS=Mus musculus OX=10090 GN=Mccc1 PE=1 SV=2	-0.3	-0.23	0.2	0.21	0.22	0.14	0.1	0.25	0.45	0.06	0.15	-0.12	0.26	0.76	0.73	0.2	-0.42	0.01	0.21	-0.05	-0.06	0.3	0.08	0.13	0.06	-0.35	0.33	0.31	0.15	0.24	0.18	0.41	0.36
Q8BH64	Ehd2	EH domain-containing protein 2 OS=Mus musculus OX=10090 GN=Ehd2 PE=1 SV=1	9.17e+18	0	211.948	61	26	584	20	23	1	2083.02	584	26	2	>sp|Q8BH64|EHD2_MOUSE EH domain-containing protein 2 OS=Mus musculus OX=10090 GN=Ehd2 PE=1 SV=1	-0.17	0.19	-0.14	0.13	0.01	0.35	0.01	-0.15	0.58	0.17	0.01	0.18	0.31	0.54	0.68	0.52	-0.08	-0.21	-0.15	0.47	-0.02	0.23	-0.02	0.5	0.12	0.08	0.06	-0.15	-0.08	0.27	-0.06	0.34	-0.16
Q921G7	Etfdh	Electron transfer flavoprotein-ubiquinone oxidoreductase, mitochondrial OS=Mus musculus OX=10090 GN=Etfdh PE=1 SV=1	-1.8e+18	0	211.927	52	26	540	1	26	1	1941.91	540	26	0	>sp|Q921G7|ETFD_MOUSE Electron transfer flavoprotein-ubiquinone oxidoreductase, mitochondrial OS=Mus musculus OX=10090 GN=Etfdh PE=1 SV=1	-0.37	-0.16	-0.17	-0.04	0.21	-0.11	0.05	0.12	0.25	-0.03	0.04	-0.22	0.4	0.3	0.61	0.34	0.08	-0.26	0.03	-0.01	0.13	-0.15	-0.14	-0.13	0.21	0.05	0.02	0.1	0.01	0.16	-0.04	0.21	0.04
O08529	Capn2	Calpain-2 catalytic subunit OS=Mus musculus OX=10090 GN=Capn2 PE=1 SV=4	5.51e+18	0	211.077	47	27	329	27	27	1	1181.14	329	27	0	>sp|O08529|CAN2_MOUSE Calpain-2 catalytic subunit OS=Mus musculus OX=10090 GN=Capn2 PE=1 SV=4	0.15	0.09	-0.12	-0.2	-0.04	-0.12	-0.11	0.02	-0.22	-0.28	0.08	-0.08	-0.14	0.01	-0.27	-0.36	-0.08	0.06	0.16	-0.23	-0.14	-0.14	-0.07	-0.12	-0.07	-0.07	-0.15	-0.07	-0.09	-0.19	-0.02	-0.16	-0.03
O88342	Wdr1	WD repeat-containing protein 1 OS=Mus musculus OX=10090 GN=Wdr1 PE=1 SV=3	-7.4e+18	0	210.704	65	26	469	15	26	1	1743.24	469	26	0	>sp|O88342|WDR1_MOUSE WD repeat-containing protein 1 OS=Mus musculus OX=10090 GN=Wdr1 PE=1 SV=3	0.02	-0.06	-0.1	-0.07	-0.04	-0.03	0.02	-0.14	-0.13	-0.14	-0.06	-0.02	-0.04	-0.03	0.03	0.03	0.09	0.03	0.05	-0.08	-0.1	-0.29	-0.16	0.05	0.07	-0.02	0.06	0.01	-0.13	0.07	-0.13	-0.03	0.01
J3QP61	Tnnt3	Isoform of Q9QZ47, Troponin T, fast skeletal muscle OS=Mus musculus OX=10090 GN=Tnnt3 PE=1 SV=1	4.65e+18	0	210.569	42	19	6149	0	3	1	23941.4	6149	19	18	>tr|J3QP61|J3QP61_MOUSE Isoform of Q9QZ47, Troponin T, fast skeletal muscle OS=Mus musculus OX=10090 GN=Tnnt3 PE=1 SV=1	0.15	0.11	0.13	0.04	0.01	0.12	0.02	0.07	-0.01	0	0.19	0.05	0.03	0.01	-0.03	0.06	0.08	0.13	0.06	-0.13	-0.03	0.01	-0.01	-0.03	0.05	-0.06	-0.33	0.09	-0.03	-0.13	0.03	-0.02	-0.07
A0A0R4J1B0	Tnnt3	Isoform of Q9QZ47, Troponin T, fast skeletal muscle OS=Mus musculus OX=10090 GN=Tnnt3 PE=1 SV=1	-7.24e+18	0	210.396	39	18	6157	0	2	1	23874	6157	18	0	>tr|A0A0R4J1B0|A0A0R4J1B0_MOUSE Isoform of Q9QZ47, Troponin T, fast skeletal muscle OS=Mus musculus OX=10090 GN=Tnnt3 PE=1 SV=1	0.5	0.22	-0.28	-0.1	0.06	0.12	0.08	-0.3	-0.13	0.26	0.13	0.06	0.04	0	-0.51	-0.17	0.21	0.42	0.37	-0.22	0.01	-0.13	0.07	0.04	0.1	-0.63	-1.25	0.06	-0.05	-0.31	-0.06	-0.25	-0.27
A8DUK4	Hbb-bs	Beta-globin OS=Mus musculus OX=10090 GN=Hbb-bs PE=1 SV=1	6.73e+18	0	210.272	91	17	3085	2	5	1	11055.8	3085	17	0	>tr|A8DUK4|A8DUK4_MOUSE Beta-globin OS=Mus musculus OX=10090 GN=Hbb-bs PE=1 SV=1	-2.12	-1.74	1.64	1.65	-1.99	-2.23	2.12	-0.42	2.18	2.11	1.7	1.15	1.97	2.3	2.02	1.7	2.03	-0.92	-1.63	-1.18	-1.51	-0.68	-0.96	1.51	1.31	-0.34	0.32	-1.92	1.59	1.96	1.64	1.97	1.75
Q8VCR8	Mylk2	Myosin light chain kinase 2, skeletal/cardiac muscle OS=Mus musculus OX=10090 GN=Mylk2 PE=1 SV=2	6.43e+18	0	210.266	59	25	619	24	24	1	2155.14	619	25	1	>sp|Q8VCR8|MYLK2_MOUSE Myosin light chain kinase 2, skeletal/cardiac muscle OS=Mus musculus OX=10090 GN=Mylk2 PE=1 SV=2	0.35	0.26	0.3	0.07	0.09	-0.04	-0.12	0.24	-0.21	-0.16	0.25	-0.02	0.04	-0.11	-0.16	0.08	0.03	0.21	0.12	-0.25	-0.02	-0.17	-0.27	0.41	0.16	0.2	-0.29	0.07	0.05	-0.18	0.14	0.09	0.15
A2AFQ0	Huwe1	Isoform of Q7TMY8, E3 ubiquitin-protein ligase HUWE1 OS=Mus musculus OX=10090 GN=Huwe1 PE=1 SV=1	9.08e+18	0	209.78	17	46	238	0	46	1	817.18	238	46	0	>tr|A2AFQ0|A2AFQ0_MOUSE Isoform of Q7TMY8, E3 ubiquitin-protein ligase HUWE1 OS=Mus musculus OX=10090 GN=Huwe1 PE=1 SV=1	-0.17	0.09	-0.01	-0.01	0.02	-0.07	-0.01	0.03	-0.08	0.04	-0.19	-0.07	0.05	-0.03	-0.16	-0.07	0.01	0.04	-0.1	0.15	0.03	-0.07	-0.19	-0.17	-0.17	-0.16	0.05	-0.01	0.06	-0.27	0.01	-0.14	0.04
A0A0R4J0I1	Serpina3k	Isoform of P07759, MCG1051009 OS=Mus musculus OX=10090 GN=Serpina3k PE=1 SV=1	8.57e+17	0	209.519	41	17	1107	3	3	1	4360.31	1107	17	0	>tr|A0A0R4J0I1|A0A0R4J0I1_MOUSE Isoform of P07759, MCG1051009 OS=Mus musculus OX=10090 GN=Serpina3k PE=1 SV=1	1.17	0.96	1.04	0.82	0.78	0.55	0.08	0.23	0.11	-0.59	0.15	0.9	-0.04	0.15	0.26	0.9	0.77	-3.11	-5.16	-4.01	-3.56	-2.94	-2.36	-0.04	-0.16	0.82	1.33	0.22	0.14	0.72	-0.08	0.21	0.88
P80316	Cct5	T-complex protein 1 subunit epsilon OS=Mus musculus OX=10090 GN=Cct5 PE=1 SV=1	1.35e+18	0	208.163	67	27	483	17	26	1	1652.28	483	27	1	>sp|P80316|TCPE_MOUSE T-complex protein 1 subunit epsilon OS=Mus musculus OX=10090 GN=Cct5 PE=1 SV=1	0.04	-0.06	0.11	0.1	-0.05	-0.09	0.16	-0.05	0.07	0.06	0.08	0.08	0.02	0	-0.07	0.06	0.14	0.15	0.11	-0.09	-0.07	0.03	-0.05	0.1	-0.05	-0.08	-0.13	-0.11	-0.04	0.07	0.13	0.06	0.05
Q8BGQ7	Aars	Alanine--tRNA ligase, cytoplasmic OS=Mus musculus OX=10090 GN=Aars PE=1 SV=1	-2.71e+18	0	207.651	43	32	429	32	32	1	1449.79	429	32	0	>sp|Q8BGQ7|SYAC_MOUSE Alanine--tRNA ligase, cytoplasmic OS=Mus musculus OX=10090 GN=Aars PE=1 SV=1	0.21	0.03	0.07	0.04	0.05	0.12	0.1	0.07	0.01	0	0.02	0.03	-0.03	-0.06	-0.15	0.17	0.11	0.01	-0.05	0.03	0.08	-0.05	0.09	0	0.19	0.13	0.03	0.11	0.14	0	0.1	0.05	0.01
Q9WTI7	Myo1c	Unconventional myosin-Ic OS=Mus musculus OX=10090 GN=Myo1c PE=1 SV=2	3.53e+18	0	207.345	42	34	370	0	34	1	1349.35	370	34	0	>sp|Q9WTI7|MYO1C_MOUSE Unconventional myosin-Ic OS=Mus musculus OX=10090 GN=Myo1c PE=1 SV=2	-0.15	0.15	-0.1	0.14	0.06	0.24	-0.04	-0.14	0.41	0.01	-0.06	0.25	0.3	0.52	0.64	0.39	-0.08	-0.09	-0.11	0.44	0.19	0.07	-0.09	0.29	0.03	-0.05	0.28	-0.09	-0.08	0.17	-0.2	0.09	-0.15
Q91ZA3	Pcca	Propionyl-CoA carboxylase alpha chain, mitochondrial OS=Mus musculus OX=10090 GN=Pcca PE=1 SV=2	2.92e+18	0	205.447	53	31	411	15	31	1	1362.99	411	31	0	>sp|Q91ZA3|PCCA_MOUSE Propionyl-CoA carboxylase alpha chain, mitochondrial OS=Mus musculus OX=10090 GN=Pcca PE=1 SV=2	-0.12	-0.06	0	0.17	0.13	0.04	0	0.33	0.35	0.12	0.06	-0.07	0.38	0.23	0.66	0.47	0.09	0	0.1	0.38	0.31	0.3	0.27	0.3	0.16	0.17	0.31	0.25	0.17	0.34	0.1	0.37	0.09
Q9DC69	Ndufa9	NADH dehydrogenase [ubiquinone] 1 alpha subcomplex subunit 9, mitochondrial OS=Mus musculus OX=10090 GN=Ndufa9 PE=1 SV=2	3.82e+18	0	204.716	63	20	712	0	20	1	2503.32	712	20	0	>sp|Q9DC69|NDUA9_MOUSE NADH dehydrogenase [ubiquinone] 1 alpha subcomplex subunit 9, mitochondrial OS=Mus musculus OX=10090 GN=Ndufa9 PE=1 SV=2	-0.4	-0.43	-0.05	-0.04	0.14	-0.14	0.09	0	0.14	0.11	-0.1	-0.37	-0.05	-0.05	0.03	-0.18	-0.06	-0.11	0.08	-0.06	0.21	-0.01	-0.08	-0.36	0.1	0.22	0.08	0.08	0.16	-0.01	0.12	0.04	0.23
P24527	Lta4h	Leukotriene A-4 hydrolase OS=Mus musculus OX=10090 GN=Lta4h PE=1 SV=4	2.16e+18	0	204.502	52	25	387	25	25	1	1160.74	387	25	0	>sp|P24527|LKHA4_MOUSE Leukotriene A-4 hydrolase OS=Mus musculus OX=10090 GN=Lta4h PE=1 SV=4	0.15	0.04	-0.03	-0.03	0.05	-0.07	0.25	0.12	0.31	0.4	0.02	0.04	-0.01	0.03	0.02	0	0.09	0.09	0.02	-0.07	-0.07	0.03	0	0.15	-0.05	0.05	-0.2	0.01	0.01	0	0.12	0.05	0.01
P26443	Glud1	Glutamate dehydrogenase 1, mitochondrial OS=Mus musculus OX=10090 GN=Glud1 PE=1 SV=1	-7.84e+18	0	204.412	48	22	375	18	22	1	1271.95	375	22	0	>sp|P26443|DHE3_MOUSE Glutamate dehydrogenase 1, mitochondrial OS=Mus musculus OX=10090 GN=Glud1 PE=1 SV=1	-0.11	-0.05	-0.07	0.02	0.08	0.07	0.21	0.15	0.4	0.22	-0.07	0.1	0.23	0.25	0.55	0.28	0.08	-0.09	0.03	0.18	0.03	0.05	-0.02	0.26	0.14	0.04	-0.01	0.15	0.16	0.25	0.14	0.24	0.09
Q62009	Postn	Periostin OS=Mus musculus OX=10090 GN=Postn PE=1 SV=2	3.8e+18	0	204.01	44	27	392	0	27	1	1452.85	392	27	0	>sp|Q62009|POSTN_MOUSE Periostin OS=Mus musculus OX=10090 GN=Postn PE=1 SV=2	-0.23	0.38	0.26	0.29	-0.1	-0.05	-0.31	-0.69	-0.35	-0.57	-0.35	0.72	-0.12	0.01	0.06	-0.12	-0.29	-0.18	-0.49	0.55	-0.4	-0.11	-0.04	-0.39	-0.19	0.02	0.4	-0.26	-0.29	0.19	-0.29	-0.27	-0.37
A0A0A0MQA3	Serpina1a	Isoform of P07758, Alpha-1-antitrypsin 1-1 OS=Mus musculus OX=10090 GN=Serpina1a PE=1 SV=1	3.86e+18	0	203.925	49	16	870	0	1	1	3335.88	870	16	0	>tr|A0A0A0MQA3|A0A0A0MQA3_MOUSE Isoform of P07758, Alpha-1-antitrypsin 1-1 OS=Mus musculus OX=10090 GN=Serpina1a PE=1 SV=1	0.99	1.86	1.51	NaN	1.6	0.9	0.54	0.63	NaN	1.08	1.43	NaN	NaN	1.31	NaN	NaN	NaN	NaN	-0.5	-0.13	-1.34	-0.39	-1.54	0.48	0.92	NaN	0.86	0.77	0.36	1	0.65	0.97	0.33
P47738	Aldh2	Aldehyde dehydrogenase, mitochondrial OS=Mus musculus OX=10090 GN=Aldh2 PE=1 SV=1	-5.09e+18	0	203.903	53	20	601	0	17	1	1958.41	601	20	3	>sp|P47738|ALDH2_MOUSE Aldehyde dehydrogenase, mitochondrial OS=Mus musculus OX=10090 GN=Aldh2 PE=1 SV=1	-0.18	-0.13	0	0.16	0.14	0.2	-0.01	0.08	0.53	0.09	0.08	0.21	0.37	0.48	0.59	0.49	0.06	-0.11	0	0.34	0.1	0.35	0.18	0.28	0.08	0.12	0.09	0.08	0.02	0.2	-0.03	0.31	0.01
P70404	Idh3g	Isocitrate dehydrogenase [NAD] subunit gamma 1, mitochondrial OS=Mus musculus OX=10090 GN=Idh3g PE=1 SV=1	-2.35e+18	0	203.748	51	15	793	15	15	1	2688.12	793	15	0	>sp|P70404|IDHG1_MOUSE Isocitrate dehydrogenase [NAD] subunit gamma 1, mitochondrial OS=Mus musculus OX=10090 GN=Idh3g PE=1 SV=1	-0.13	0.24	0.01	0.03	0.05	-0.05	0.12	0.04	0.16	0.06	0.07	-0.18	0.02	0.07	0.32	0.03	0.03	-0.06	0.15	-0.08	0.08	0.04	0	0.05	0.17	0.04	0.08	0.17	0.02	0.01	0.02	0.07	0.06
Q9DB77	Uqcrc2	Cytochrome b-c1 complex subunit 2, mitochondrial OS=Mus musculus OX=10090 GN=Uqcrc2 PE=1 SV=1	6.95e+18	0	203.626	49	18	1051	12	18	1	3526.79	1051	18	0	>sp|Q9DB77|QCR2_MOUSE Cytochrome b-c1 complex subunit 2, mitochondrial OS=Mus musculus OX=10090 GN=Uqcrc2 PE=1 SV=1	-0.28	-0.26	0	0.11	0.17	-0.02	0.15	0.08	0.26	0.15	0.03	-0.17	0.01	0.15	0.44	0.08	0.02	-0.13	0.13	0.1	0.18	0.11	0.05	-0.01	0.15	0.03	0.21	0.18	0.15	0.1	0.09	0.08	0.15
Q3TTY5	Krt2	Keratin, type II cytoskeletal 2 epidermal OS=Mus musculus OX=10090 GN=Krt2 PE=1 SV=1	-7e+18	0	203.395	44	27	282	23	23	1	937.4	282	27	0	>sp|Q3TTY5|K22E_MOUSE Keratin, type II cytoskeletal 2 epidermal OS=Mus musculus OX=10090 GN=Krt2 PE=1 SV=1	-0.14	0.94	0.96	-0.38	-0.34	-0.43	-0.75	-0.02	-1.14	-0.17	-0.76	-0.27	0.04	-0.31	-0.05	-0.37	-0.66	1.16	-0.66	-0.92	-0.26	-0.52	0.28	-0.81	0.01	0.06	-0.09	-0.23	2.42	-0.64	0.15	-0.54	-0.19
Q9Z0X1	Aifm1	Apoptosis-inducing factor 1, mitochondrial OS=Mus musculus OX=10090 GN=Aifm1 PE=1 SV=1	4.44e+18	0	203.361	49	23	410	0	23	1	1432.1	410	23	0	>sp|Q9Z0X1|AIFM1_MOUSE Apoptosis-inducing factor 1, mitochondrial OS=Mus musculus OX=10090 GN=Aifm1 PE=1 SV=1	-0.19	0.01	0	0.01	0.2	0.09	0.06	0.05	0.31	0.03	0.01	-0.13	-0.01	-0.04	0.29	0.28	-0.03	-0.15	0.1	0.05	0.12	0.05	-0.09	-0.03	-0.01	0.09	-0.08	0.22	-0.05	0.05	-0.13	0.01	0.12
Q60936	Coq8a	Atypical kinase COQ8A, mitochondrial OS=Mus musculus OX=10090 GN=Coq8a PE=1 SV=2	3.89e+18	0	203.238	39	19	570	0	19	1	2174.06	570	19	0	>sp|Q60936|COQ8A_MOUSE Atypical kinase COQ8A, mitochondrial OS=Mus musculus OX=10090 GN=Coq8a PE=1 SV=2	-0.32	-0.45	-0.22	-0.02	-0.09	-0.48	-0.12	0.17	0.06	-0.21	0.03	-0.28	-0.33	-0.23	0.05	-0.12	-0.28	-0.4	-0.22	-0.14	0.1	0.33	0.41	-0.47	0.08	-0.16	0.05	0.15	-0.07	-0.06	-0.16	0	0.02
P80318	Cct3	T-complex protein 1 subunit gamma OS=Mus musculus OX=10090 GN=Cct3 PE=1 SV=1	7.4e+18	0	203.134	57	26	401	0	26	1	1353.59	401	26	0	>sp|P80318|TCPG_MOUSE T-complex protein 1 subunit gamma OS=Mus musculus OX=10090 GN=Cct3 PE=1 SV=1	0.08	-0.12	0.1	0.1	0	0.06	0.19	-0.03	-0.03	0.13	0.15	0.14	0.02	0.07	-0.09	-0.03	0.1	0.23	0.13	-0.01	0.04	0.01	0.03	0.07	-0.01	0.08	0.05	-0.1	0.05	0.14	0.14	0.11	0.08
P70402	Mybph	Myosin-binding protein H OS=Mus musculus OX=10090 GN=Mybph PE=2 SV=2	3.62e+18	0	202.941	60	18	1026	18	18	1	3640.75	1026	18	0	>sp|P70402|MYBPH_MOUSE Myosin-binding protein H OS=Mus musculus OX=10090 GN=Mybph PE=2 SV=2	0.26	0.31	0.26	0.23	0.18	0.27	0.15	0.17	0.05	0.09	0.39	0.17	0.17	0.23	0.17	0.1	0.13	0.49	0.42	-0.29	0.02	-0.09	0.01	0.08	0.08	-0.01	-0.54	0.08	0.03	-0.03	0.35	0.17	0.18
Q9ERD7	Tubb3	Tubulin beta-3 chain OS=Mus musculus OX=10090 GN=Tubb3 PE=1 SV=1	7.42e+17	0	201.781	55	20	870	3	5	1	2815.37	870	20	2	>sp|Q9ERD7|TBB3_MOUSE Tubulin beta-3 chain OS=Mus musculus OX=10090 GN=Tubb3 PE=1 SV=1	0.54	-1.28	0.27	-0.04	-0.55	-0.3	-0.41	-0.2	0.25	-0.1	0.13	0.11	-0.59	-0.03	-0.4	-0.73	NaN	-0.03	1.31	-0.42	-0.05	-0.13	0.43	-0.64	-0.29	NaN	-0.64	-0.18	-0.01	-0.55	-1.09	-0.91	-0.31
Q6IFZ6	Krt77	Keratin, type II cytoskeletal 1b OS=Mus musculus OX=10090 GN=Krt77 PE=1 SV=1	9.98e+17	0	201.118	56	30	429	23	23	1	1466.26	429	30	3	>sp|Q6IFZ6|K2C1B_MOUSE Keratin, type II cytoskeletal 1b OS=Mus musculus OX=10090 GN=Krt77 PE=1 SV=1	-1.64	0.5	-0.72	-1.45	-0.47	1.85	-1.88	-0.9	-1.32	-1.24	-0.78	1.86	0.47	0.7	-1.56	-1.13	-0.43	-1.28	-2.18	1.76	-1.56	-1.96	-1.37	-1.45	-0.85	-0.93	-0.5	2.04	0.4	0.35	0.65	-0.45	-1.2
Q9ET78	Jph2	Junctophilin-2 OS=Mus musculus OX=10090 GN=Jph2 PE=1 SV=2	1.28e+18	0	201.003	49	26	424	23	25	1	1429.3	424	26	1	>sp|Q9ET78|JPH2_MOUSE Junctophilin-2 OS=Mus musculus OX=10090 GN=Jph2 PE=1 SV=2	0.17	0.18	0	-0.03	-0.02	0	0.03	0.07	-0.01	0.07	0.05	-0.07	-0.08	-0.03	-0.22	-0.03	0.04	0.13	0.01	-0.18	0.09	-0.08	0.07	-0.14	0.01	-0.18	0.16	0	-0.1	-0.17	0.06	0.08	0.04
P50247	Ahcy	Adenosylhomocysteinase OS=Mus musculus OX=10090 GN=Ahcy PE=1 SV=3	-1.01e+18	0	200.925	64	24	465	20	23	1	1571.9	465	24	1	>sp|P50247|SAHH_MOUSE Adenosylhomocysteinase OS=Mus musculus OX=10090 GN=Ahcy PE=1 SV=3	0.1	0.05	0.03	0.01	0.12	0.08	0.16	0.13	0.04	0.19	0.11	0.08	-0.01	-0.2	-0.24	0.06	-0.01	0.15	0.18	-0.08	-0.06	-0.16	-0.15	0	0.13	0.12	-0.37	0.03	0	-0.08	0.09	0.05	0.08
P48962	Slc25a4	ADP/ATP translocase 1 OS=Mus musculus OX=10090 GN=Slc25a4 PE=1 SV=4	-7.4e+18	0	200.86	64	25	2250	14	14	1	7281.34	2250	25	13	>sp|P48962|ADT1_MOUSE ADP/ATP translocase 1 OS=Mus musculus OX=10090 GN=Slc25a4 PE=1 SV=4	-0.07	-0.18	-0.06	-0.15	0.21	-0.06	0.1	0.05	0.05	0.04	0.09	-0.21	-0.1	-0.12	0.02	-0.15	0.09	0	0.21	-0.16	0.19	0.03	0.06	-0.15	0.26	0.12	-0.12	0.19	0.02	-0.13	0.13	0.01	0.21
Q61897	Krt33b	Keratin, type I cuticular Ha3-II OS=Mus musculus OX=10090 GN=Krt33b PE=1 SV=2	2.57e+18	0	199.809	65	26	912	6	7	1	3328.73	912	26	3	>sp|Q61897|KT33B_MOUSE Keratin, type I cuticular Ha3-II OS=Mus musculus OX=10090 GN=Krt33b PE=1 SV=2	0	1.25	-0.11	-0.08	-0.24	0.69	0.31	-0.8	-0.64	-0.79	0.48	0.97	0.16	-0.43	0.36	-0.77	-0.52	0.63	0.45	-0.43	-0.48	-1.36	-0.69	0.51	1.16	-0.34	0.14	0.5	1.13	0.01	0.4	-0.24	-0.17
Q64691	Capn3	Calpain-3 OS=Mus musculus OX=10090 GN=Capn3 PE=2 SV=2	-1.84e+18	0	199.498	52	30	459	3	30	1	1664.88	459	30	0	>sp|Q64691|CAN3_MOUSE Calpain-3 OS=Mus musculus OX=10090 GN=Capn3 PE=2 SV=2	-0.06	-0.06	-0.1	-0.15	-0.05	-0.31	-0.28	0.02	-0.59	-0.14	-0.01	-0.21	-0.27	-0.36	-0.35	-0.38	-0.28	0.15	0.13	-0.32	-0.02	-0.05	-0.04	-0.31	-0.14	0.07	0.1	0.03	-0.21	-0.32	-0.22	-0.35	-0.14
P05214	Tuba3a	Tubulin alpha-3 chain OS=Mus musculus OX=10090 GN=Tuba3a PE=1 SV=1	-8.57e+18	0	199.154	53	17	786	1	1	1	3195.64	786	17	1	>sp|P05214|TBA3_MOUSE Tubulin alpha-3 chain OS=Mus musculus OX=10090 GN=Tuba3a PE=1 SV=1	0.4	0.31	0.5	0.29	0	0.42	0.18	0.12	0.33	0.12	0.2	0.04	-0.03	-0.26	-0.16	0.57	0.11	0.32	0.37	-0.14	-0.04	-0.24	-0.39	0.25	0.04	0.59	-0.07	0	0.09	0.06	0.28	0.15	0.3
Q61765	Krt31	Keratin, type I cuticular Ha1 OS=Mus musculus OX=10090 GN=Krt31 PE=1 SV=2	-3.55e+18	0	198.97	63	26	850	3	3	1	3095.18	850	26	25	>sp|Q61765|K1H1_MOUSE Keratin, type I cuticular Ha1 OS=Mus musculus OX=10090 GN=Krt31 PE=1 SV=2	-0.31	1.11	-0.09	0	-0.69	0.47	0.51	-0.62	-0.67	-0.77	0.72	1.33	0.35	-0.31	0.72	-0.76	-0.65	0.65	0.51	-0.24	-0.24	-1.3	-0.91	1.01	1.48	-0.52	0.37	0.71	1.01	-0.3	0.15	-0.66	-0.05
P09542	Myl3	Myosin light chain 3 OS=Mus musculus OX=10090 GN=Myl3 PE=1 SV=4	4.63e+16	0	198.244	81	16	3424	0	12	1	9202.38	3424	16	1	>sp|P09542|MYL3_MOUSE Myosin light chain 3 OS=Mus musculus OX=10090 GN=Myl3 PE=1 SV=4	-1.09	-0.71	-0.64	-0.23	0	-0.53	0.54	-0.36	-0.1	0.04	-0.28	-0.86	-0.45	-0.05	0.82	-0.02	-0.11	-1.73	-1.13	-0.04	0	0.29	0.7	-0.63	0.44	-0.14	-0.22	0.23	-0.21	-0.45	-0.23	0.09	0.21
Q9Z2T6	Krt85	Keratin, type II cuticular Hb5 OS=Mus musculus OX=10090 GN=Krt85 PE=1 SV=2	3.52e+17	0	197.961	49	28	706	12	12	1	2188.94	706	28	0	>sp|Q9Z2T6|KRT85_MOUSE Keratin, type II cuticular Hb5 OS=Mus musculus OX=10090 GN=Krt85 PE=1 SV=2	-0.42	0.85	-0.05	-0.01	-0.64	0.41	0.36	-0.68	-0.7	-0.95	0.43	1.03	0.31	-0.71	0.6	-0.78	-0.67	0.64	0.32	-0.19	-0.4	-1.04	-0.65	0.76	1.04	-0.55	0.25	0.57	0.9	-0.36	0.09	-0.77	-0.15
Q9JJZ2	Tuba8	Tubulin alpha-8 chain OS=Mus musculus OX=10090 GN=Tuba8 PE=1 SV=1	-7.42e+18	0	197.569	53	17	742	7	7	1	2996.84	742	17	0	>sp|Q9JJZ2|TBA8_MOUSE Tubulin alpha-8 chain OS=Mus musculus OX=10090 GN=Tuba8 PE=1 SV=1	0.21	-0.03	0.24	0.13	0.05	0.04	0.14	0.17	0.14	0.09	0.04	-0.11	-0.15	-0.11	-0.43	0.28	0.23	0.11	-0.04	-0.2	0.15	-0.18	-0.2	-0.31	-0.05	0.18	0.38	0.05	-0.01	-0.05	0.22	0.03	0.39
Q8BMJ2	Lars	Leucine--tRNA ligase, cytoplasmic OS=Mus musculus OX=10090 GN=Lars PE=1 SV=2	5.07e+17	0	197.154	35	33	285	33	33	1	966.93	285	33	0	>sp|Q8BMJ2|SYLC_MOUSE Leucine--tRNA ligase, cytoplasmic OS=Mus musculus OX=10090 GN=Lars PE=1 SV=2	-0.02	0.15	0.12	0	0.06	0.05	-0.17	0.12	-0.1	-0.01	0.03	-0.07	0.07	-0.18	-0.09	0.04	-0.04	-0.01	-0.13	-0.02	0.25	0.02	0.22	0.08	0.09	0.23	-0.07	0.07	-0.02	0.01	0.12	0.02	0.1
Q64514-2	Tpp2	Isoform of Q64514, Isoform Short of Tripeptidyl-peptidase 2 OS=Mus musculus OX=10090 GN=Tpp2	-3.32e+18	0	196.947	38	35	331	2	35	1	1023.95	331	35	0	>sp|Q64514-2|TPP2_MOUSE Isoform of Q64514, Isoform Short of Tripeptidyl-peptidase 2 OS=Mus musculus OX=10090 GN=Tpp2	0.11	-0.05	0.02	-0.03	-0.02	-0.08	0.28	0.03	0.24	0.25	-0.04	-0.16	-0.06	-0.2	-0.33	0.02	0.04	-0.02	-0.05	-0.08	0.06	0.03	0.01	-0.36	-0.08	-0.04	0.14	0.06	0.1	-0.02	0.11	0.03	0.26
P49813	Tmod1	Tropomodulin-1 OS=Mus musculus OX=10090 GN=Tmod1 PE=1 SV=2	-7.52e+18	0	196.831	63	19	496	17	17	1	1786.45	496	19	1	>sp|P49813|TMOD1_MOUSE Tropomodulin-1 OS=Mus musculus OX=10090 GN=Tmod1 PE=1 SV=2	0.03	0.08	0.44	0.4	-0.2	0.17	-0.04	-0.01	-0.07	-0.01	0.2	0.11	0.19	-0.15	-0.2	0.26	0.02	0.06	-0.08	-0.01	0.18	0.29	0.24	0.22	0.12	0.07	-0.2	-0.21	-0.12	-0.19	0.13	-0.03	0.07
P40142	Tkt	Transketolase OS=Mus musculus OX=10090 GN=Tkt PE=1 SV=1	8.5e+17	0	195.859	51	23	436	6	23	1	1656.92	436	23	0	>sp|P40142|TKT_MOUSE Transketolase OS=Mus musculus OX=10090 GN=Tkt PE=1 SV=1	-0.3	0.73	-0.13	0.74	-0.16	1.02	0.05	-0.61	1.15	-0.12	0.22	1.57	1.72	2.18	2.06	1.85	0.35	-0.49	-0.4	1.52	0.28	0.57	0.67	1.75	0.15	-0.28	0.55	-0.36	0.11	1.78	-0.03	1.24	-0.28
Q9CQN1	Trap1	Heat shock protein 75 kDa, mitochondrial OS=Mus musculus OX=10090 GN=Trap1 PE=1 SV=1	-2.16e+18	0	195.34	50	27	449	26	26	1	1572.98	449	27	0	>sp|Q9CQN1|TRAP1_MOUSE Heat shock protein 75 kDa, mitochondrial OS=Mus musculus OX=10090 GN=Trap1 PE=1 SV=1	0.06	0.07	-0.04	0.13	0.16	0.28	0.21	0.1	0.36	0.26	0.09	-0.02	0.15	0.17	0.39	0.26	0.08	0.08	0.13	0.15	0.27	0.15	0.04	0.22	0.11	0.07	0.11	0.19	0.18	0.3	0.18	0.32	0.05
Q7TSQ8	Pdpr	Pyruvate dehydrogenase phosphatase regulatory subunit, mitochondrial OS=Mus musculus OX=10090 GN=Pdpr PE=1 SV=1	-6.69e+18	0	195.223	41	32	381	11	32	1	1246.73	381	32	0	>sp|Q7TSQ8|PDPR_MOUSE Pyruvate dehydrogenase phosphatase regulatory subunit, mitochondrial OS=Mus musculus OX=10090 GN=Pdpr PE=1 SV=1	0.16	-0.01	0.12	0.07	0.2	0.07	0.21	0.17	0.33	0.27	0.07	-0.19	-0.03	-0.13	-0.06	0.19	0.12	-0.36	-0.23	-0.19	0.11	0.09	0.01	-0.03	0.23	-0.03	0.08	0.22	0.1	-0.02	0.1	0.1	0.08
P70398	Usp9x	Probable ubiquitin carboxyl-terminal hydrolase FAF-X OS=Mus musculus OX=10090 GN=Usp9x PE=1 SV=2	1.13e+17	0	195.222	20	43	289	0	32	1	856.42	289	43	11	>sp|P70398|USP9X_MOUSE Probable ubiquitin carboxyl-terminal hydrolase FAF-X OS=Mus musculus OX=10090 GN=Usp9x PE=1 SV=2	0.03	0.07	0.04	-0.2	0.01	-0.12	0	0.02	0.01	-0.01	-0.04	0.02	-0.09	-0.1	-0.19	-0.12	-0.01	-0.18	0.02	-0.07	0.07	0.01	0.05	-0.28	-0.11	0.12	-0.05	-0.05	-0.02	-0.13	0.04	-0.09	0.05
E9Q3X0	Mvp	Isoform of Q9EQK5, Major vault protein OS=Mus musculus OX=10090 GN=Mvp PE=1 SV=1	4.14e+18	0	194.909	46	29	363	0	29	1	1379.44	363	29	0	>tr|E9Q3X0|E9Q3X0_MOUSE Isoform of Q9EQK5, Major vault protein OS=Mus musculus OX=10090 GN=Mvp PE=1 SV=1	-0.15	-0.02	-0.15	-0.04	-0.19	-0.11	0.14	0.07	0.21	0.17	-0.13	0.07	0.09	0.24	0.21	-0.09	-0.12	-0.13	-0.05	-0.05	-0.18	0.03	0.12	0.01	-0.03	0.14	0.17	-0.1	-0.11	0	-0.02	0.07	0.05
P35486	Pdha1	Pyruvate dehydrogenase E1 component subunit alpha, somatic form, mitochondrial OS=Mus musculus OX=10090 GN=Pdha1 PE=1 SV=1	-6.39e+18	0	194.425	64	22	878	21	21	1	2717.72	878	22	1	>sp|P35486|ODPA_MOUSE Pyruvate dehydrogenase E1 component subunit alpha, somatic form, mitochondrial OS=Mus musculus OX=10090 GN=Pdha1 PE=1 SV=1	-0.37	-0.32	-0.09	-0.02	0.06	-0.17	0.08	0.04	0.15	0.15	0.02	-0.19	0.09	0.26	0.37	0.15	0.15	-0.26	-0.05	0.09	0.31	0.21	0.09	-0.1	0.13	-0.03	0.27	0.28	0.22	0.12	0.13	0.2	0.16
Q6PA06	Atl2	Atlastin-2 OS=Mus musculus OX=10090 GN=Atl2 PE=1 SV=1	-3.99e+18	0	194.237	47	19	327	6	18	1	1315.33	327	19	1	>sp|Q6PA06|ATLA2_MOUSE Atlastin-2 OS=Mus musculus OX=10090 GN=Atl2 PE=1 SV=1	0.29	0.28	0.16	0.07	-0.08	0.17	-0.02	0.14	-0.03	0.15	0.25	0.01	-0.08	0.02	0.04	0.26	0.25	0.08	0.02	-0.36	-0.13	0.02	0.01	0.09	0.16	0.14	0.4	0.2	0.04	-0.09	0.05	-0.01	0.05
Q8BIJ6	Iars2	Isoleucine--tRNA ligase, mitochondrial OS=Mus musculus OX=10090 GN=Iars2 PE=1 SV=1	8.63e+18	0	194.064	35	29	279	7	29	1	963.36	279	29	0	>sp|Q8BIJ6|SYIM_MOUSE Isoleucine--tRNA ligase, mitochondrial OS=Mus musculus OX=10090 GN=Iars2 PE=1 SV=1	-0.19	-0.07	-0.1	0.02	0.04	0.05	0.07	0.02	0.18	0.04	0	-0.15	0.09	-0.05	0.16	0.19	-0.08	-0.13	0	0.11	0.13	-0.02	-0.18	-0.02	-0.07	0.14	-0.22	-0.08	-0.04	-0.11	-0.06	0.05	-0.04
Q924X2	Cpt1b	Carnitine O-palmitoyltransferase 1, muscle isoform OS=Mus musculus OX=10090 GN=Cpt1b PE=1 SV=1	-5.9e+17	0	193.315	42	29	604	19	27	1	1886.34	604	29	3	>sp|Q924X2|CPT1B_MOUSE Carnitine O-palmitoyltransferase 1, muscle isoform OS=Mus musculus OX=10090 GN=Cpt1b PE=1 SV=1	-0.17	-0.16	-0.09	-0.07	0.02	-0.26	0.08	0.11	0.12	-0.06	0.08	-0.32	-0.1	-0.12	0.01	-0.21	-0.06	-0.05	0.11	-0.2	0.05	-0.03	-0.09	-0.31	0.06	-0.07	0.1	0	-0.01	-0.11	0	-0.07	0.07
Q99KK7	Dpp3	Dipeptidyl peptidase 3 OS=Mus musculus OX=10090 GN=Dpp3 PE=1 SV=2	-6.97e+18	0	193.189	52	26	329	25	26	1	1181.69	329	26	0	>sp|Q99KK7|DPP3_MOUSE Dipeptidyl peptidase 3 OS=Mus musculus OX=10090 GN=Dpp3 PE=1 SV=2	0.01	-0.01	0.09	-0.03	0.26	-0.09	0.23	-0.04	0.14	0.08	0.14	0.26	0.07	0.01	-0.01	-0.02	0.01	-0.06	-0.03	0.19	0.36	-0.03	-0.08	0.11	0.18	0.11	-0.05	-0.18	0.12	0.26	0.24	0.2	0.1
Q8K0Y2	Krt33a	Keratin, type I cuticular Ha3-I OS=Mus musculus OX=10090 GN=Krt33a PE=1 SV=1	-7.98e+18	0	193.053	65	26	953	6	7	1	3885.79	953	26	2	>sp|Q8K0Y2|KT33A_MOUSE Keratin, type I cuticular Ha3-I OS=Mus musculus OX=10090 GN=Krt33a PE=1 SV=1	-0.5	0.85	-0.18	0.03	-0.58	0.4	0.41	-0.54	-0.7	-0.57	0.44	0.98	0.17	-0.56	0.49	-0.92	-0.61	0.42	0.33	-0.33	-0.26	-1.22	-0.93	0.82	0.99	-0.69	0.34	0.55	0.99	-0.27	0.1	-0.64	-0.16
P46935	Nedd4	E3 ubiquitin-protein ligase NEDD4 OS=Mus musculus OX=10090 GN=Nedd4 PE=1 SV=3	-3.9e+18	0	192.176	45	31	420	20	31	1	1418.35	420	31	0	>sp|P46935|NEDD4_MOUSE E3 ubiquitin-protein ligase NEDD4 OS=Mus musculus OX=10090 GN=Nedd4 PE=1 SV=3	0.16	0.04	-0.18	-0.11	-0.14	-0.11	0	0.02	0.1	0.18	-0.09	-0.04	-0.1	-0.07	-0.11	0.05	0.07	0.09	-0.02	0.1	0.1	0.12	0.1	-0.2	-0.05	0.07	-0.09	-0.21	0.02	-0.09	0.04	-0.02	0.03
Q62167	Ddx3x	ATP-dependent RNA helicase DDX3X OS=Mus musculus OX=10090 GN=Ddx3x PE=1 SV=3	1.08e+18	0	191.506	49	31	478	2	30	1	1552.91	478	31	1	>sp|Q62167|DDX3X_MOUSE ATP-dependent RNA helicase DDX3X OS=Mus musculus OX=10090 GN=Ddx3x PE=1 SV=3	0.09	0.01	0.06	0.05	-0.02	0.17	0.01	-0.09	0	0.09	0.1	0.05	0.05	0.1	0.07	0.15	0.09	-0.06	-0.01	0.04	-0.02	0.01	-0.08	0.22	0.04	0.03	0.03	-0.04	-0.03	0.07	0	0	-0.07
Q91YQ5	Rpn1	Dolichyl-diphosphooligosaccharide--protein glycosyltransferase subunit 1 OS=Mus musculus OX=10090 GN=Rpn1 PE=1 SV=1	-1.74e+18	0	190.75	58	28	468	25	28	1	1606.48	468	28	0	>sp|Q91YQ5|RPN1_MOUSE Dolichyl-diphosphooligosaccharide--protein glycosyltransferase subunit 1 OS=Mus musculus OX=10090 GN=Rpn1 PE=1 SV=1	0.1	0.06	0	-0.03	0	0	0.03	0.09	-0.02	0.16	0.07	0.01	-0.09	-0.08	-0.1	-0.09	-0.19	0.18	0.04	0.03	-0.04	-0.09	-0.06	-0.03	-0.11	-0.11	0	-0.14	-0.1	-0.05	-0.02	-0.03	-0.09
G3X8Q5	Cp	Isoform of Q61147, Ceruloplasmin OS=Mus musculus OX=10090 GN=Cp PE=1 SV=1	-4.67e+18	0	188.949	37	30	266	0	1	1	847.97	266	30	30	>tr|G3X8Q5|G3X8Q5_MOUSE Isoform of Q61147, Ceruloplasmin OS=Mus musculus OX=10090 GN=Cp PE=1 SV=1	-0.2	-0.15	-0.16	-0.3	-0.3	-0.48	-0.3	-0.38	-0.19	-0.32	-0.13	0.12	-0.31	-0.15	-0.12	-0.21	-0.13	-0.11	-0.28	0.44	-0.02	0.07	0.2	-0.08	-0.19	-0.38	0.19	-0.19	-0.13	0.18	-0.23	-0.04	-0.07
P29758	Oat	Ornithine aminotransferase, mitochondrial OS=Mus musculus OX=10090 GN=Oat PE=1 SV=1	7.02e+18	0	188.471	63	18	356	18	18	1	1375.64	356	18	0	>sp|P29758|OAT_MOUSE Ornithine aminotransferase, mitochondrial OS=Mus musculus OX=10090 GN=Oat PE=1 SV=1	-0.05	-0.1	-0.04	0.01	0.2	0.03	-0.05	0.04	-0.02	-0.05	0.27	0.07	-0.17	-0.1	0	-0.13	-0.02	0.01	0	0.32	0.44	0.05	0.01	0.11	0.12	0.02	0.13	0.21	0.01	0.08	0.04	0.02	0.04
B0QZL1	Eno1	Isoform of P17182, Alpha-enolase (Fragment) OS=Mus musculus OX=10090 GN=Eno1 PE=1 SV=1	-5.86e+17	0	188.433	70	10	1686	1	1	1	6181.1	1686	10	0	>tr|B0QZL1|B0QZL1_MOUSE Isoform of P17182, Alpha-enolase (Fragment) OS=Mus musculus OX=10090 GN=Eno1 PE=1 SV=1	0.24	0.63	-0.09	-0.29	-0.18	-0.27	-0.03	-0.29	-0.31	-0.39	0.38	0.11	-0.23	0.03	-0.24	-0.32	0.28	0.2	0.3	-0.44	-0.36	-0.6	-0.44	-0.22	0.12	-0.61	-0.36	-0.23	-0.15	-0.36	0.02	-0.01	-0.1
E9PZD8	Cp	Isoform of Q61147, Ceruloplasmin OS=Mus musculus OX=10090 GN=Cp PE=1 SV=1	-2.63e+18	0	188.023	37	30	261	0	1	1	830.8	261	30	0	>tr|E9PZD8|E9PZD8_MOUSE Isoform of Q61147, Ceruloplasmin OS=Mus musculus OX=10090 GN=Cp PE=1 SV=1	NaN	NaN	-0.02	NaN	NaN	NaN	NaN	NaN	NaN	NaN	-0.13	NaN	NaN	-0.18	NaN	NaN	NaN	NaN	NaN	NaN	NaN	NaN	NaN	NaN	NaN	NaN	-0.21	NaN	NaN	NaN	NaN	NaN	NaN
Q8BU30	Iars	Isoleucine--tRNA ligase, cytoplasmic OS=Mus musculus OX=10090 GN=Iars PE=1 SV=2	7.45e+18	0	187.892	37	35	377	32	35	1	1210.82	377	35	0	>sp|Q8BU30|SYIC_MOUSE Isoleucine--tRNA ligase, cytoplasmic OS=Mus musculus OX=10090 GN=Iars PE=1 SV=2	0.03	-0.13	0.04	0.09	0.05	-0.08	0.08	0.15	0.01	0.06	-0.01	-0.19	-0.03	-0.05	-0.25	-0.02	0.11	0.05	0	-0.1	0.09	0.06	0.15	-0.1	0.1	-0.07	0.07	-0.01	0.12	0.02	0.22	0.07	0.18
Q02788	Col6a2	Collagen alpha-2(VI) chain OS=Mus musculus OX=10090 GN=Col6a2 PE=1 SV=3	3.63e+17	0	187.848	29	21	876	6	21	1	3147.06	876	21	0	>sp|Q02788|CO6A2_MOUSE Collagen alpha-2(VI) chain OS=Mus musculus OX=10090 GN=Col6a2 PE=1 SV=3	0.22	0.42	0.09	-0.04	-0.05	0.01	-0.23	-0.12	-0.21	-0.18	-0.03	0.34	-0.3	-0.03	0	-0.07	-0.01	-0.13	-0.17	0.25	0.14	0.02	0.19	-0.03	0.15	0.37	0.34	-0.05	0.12	0.07	-0.04	-0.07	-0.03
P02535	Krt10	Keratin, type I cytoskeletal 10 OS=Mus musculus OX=10090 GN=Krt10 PE=1 SV=3	6.01e+18	0	187.727	49	24	468	0	22	1	1717.14	468	24	2	>sp|P02535|K1C10_MOUSE Keratin, type I cytoskeletal 10 OS=Mus musculus OX=10090 GN=Krt10 PE=1 SV=3	-0.78	0.58	0.12	-1.17	-0.2	1.55	-1.26	-0.52	-1.22	-0.48	-0.69	1.54	0.27	0.32	-1.05	-0.9	-0.69	-0.09	-1.75	1.72	-0.89	-0.84	0.15	-1.15	-0.35	-0.95	-0.27	1.61	1.17	0.21	0.52	-0.36	-0.7
E9Q557	Dsp	Desmoplakin OS=Mus musculus OX=10090 GN=Dsp PE=1 SV=1	-9.7e+17	0	187.565	20	40	137	4	40	1	498.76	137	40	0	>sp|E9Q557|DESP_MOUSE Desmoplakin OS=Mus musculus OX=10090 GN=Dsp PE=1 SV=1	-0.65	0.52	-0.12	-0.18	-0.13	0.95	-0.08	-0.59	-0.51	-0.62	-0.1	0.56	0.29	0.27	-0.02	-0.72	0.01	0	-0.49	1.67	-0.63	-0.77	-0.4	0.06	0.26	-0.09	0.16	1.38	0.52	0.23	0.31	-0.59	-0.2
Q61584	Fxr1	Fragile X mental retardation syndrome-related protein 1 OS=Mus musculus OX=10090 GN=Fxr1 PE=1 SV=2	-9.17e+18	0	187.357	46	24	355	0	21	1	1232.55	355	24	3	>sp|Q61584|FXR1_MOUSE Fragile X mental retardation syndrome-related protein 1 OS=Mus musculus OX=10090 GN=Fxr1 PE=1 SV=2	-0.04	-0.07	0.12	0.06	-0.03	-0.01	-0.09	-0.02	-0.21	-0.03	-0.11	-0.27	0.06	-0.18	-0.12	0.05	0.12	-0.06	-0.13	-0.05	0.06	-0.01	0.04	-0.13	-0.05	-0.06	-0.06	-0.1	-0.01	-0.19	-0.01	-0.07	-0.03
Q9ERK4	Cse1l	Exportin-2 OS=Mus musculus OX=10090 GN=Cse1l PE=1 SV=1	-1.68e+18	0	187.15	35	29	408	0	29	1	1248.89	408	29	0	>sp|Q9ERK4|XPO2_MOUSE Exportin-2 OS=Mus musculus OX=10090 GN=Cse1l PE=1 SV=1	0.15	0.13	0.03	-0.07	0.02	-0.05	0.05	-0.08	-0.07	0.06	0.08	-0.06	-0.04	-0.25	-0.3	-0.15	-0.04	0.08	0.09	-0.22	-0.05	-0.03	-0.12	-0.07	-0.04	0.03	-0.21	0.02	-0.06	-0.17	0.04	-0.06	0.07
Q9D646	Krt34	Keratin, type I cuticular Ha4 OS=Mus musculus OX=10090 GN=Krt34 PE=2 SV=1	-1.03e+17	0	186.867	62	25	812	5	5	1	3007.09	812	25	1	>sp|Q9D646|KRT34_MOUSE Keratin, type I cuticular Ha4 OS=Mus musculus OX=10090 GN=Krt34 PE=2 SV=1	-1.14	0.29	-0.03	0.21	-1.21	-0.34	0.68	-0.7	-0.38	-1.08	0.84	1.58	0.4	-0.33	0.95	-0.75	-0.75	0.83	0.68	-0.38	-0.28	-1.3	-0.95	1.29	1.81	-0.42	0.4	0.74	0.21	-1.24	-0.49	-1.43	0.05
P54071	Idh2	Isocitrate dehydrogenase [NADP], mitochondrial OS=Mus musculus OX=10090 GN=Idh2 PE=1 SV=3	-1.2e+18	0	185.048	56	25	831	14	24	1	2667.68	831	25	1	>sp|P54071|IDHP_MOUSE Isocitrate dehydrogenase [NADP], mitochondrial OS=Mus musculus OX=10090 GN=Idh2 PE=1 SV=3	-0.83	-0.44	-0.16	-0.03	0.13	-0.36	0.08	0.64	0.4	0.04	0.1	-0.35	-0.05	0.15	0.41	-0.02	-0.07	-0.61	-0.28	-0.34	-0.09	0.03	0.03	-0.34	0.35	-0.15	-0.27	0.24	0.12	0.1	0.05	0.4	0.12
P09103	P4hb	Protein disulfide-isomerase OS=Mus musculus OX=10090 GN=P4hb PE=1 SV=2	-8.88e+18	0	184.88	59	25	620	17	25	1	2059.58	620	25	0	>sp|P09103|PDIA1_MOUSE Protein disulfide-isomerase OS=Mus musculus OX=10090 GN=P4hb PE=1 SV=2	0.4	0.53	0.18	0.11	0.01	0.26	0.05	-0.17	0.06	0.11	0.08	0.04	0.03	-0.08	-0.01	0.21	-0.01	-0.14	-0.18	-0.07	-0.14	-0.09	-0.09	0.16	0.03	0.37	0.02	-0.04	-0.09	-0.02	-0.04	-0.04	-0.01
P70695	Fbp2	Fructose-1,6-bisphosphatase isozyme 2 OS=Mus musculus OX=10090 GN=Fbp2 PE=1 SV=2	1.36e+18	0	183.945	58	16	518	15	16	1	1957.7	518	16	0	>sp|P70695|F16P2_MOUSE Fructose-1,6-bisphosphatase isozyme 2 OS=Mus musculus OX=10090 GN=Fbp2 PE=1 SV=2	-0.3	-0.26	-0.46	-0.35	0.02	0.02	-0.03	0.73	-0.27	0.16	-0.33	-0.62	0.17	0	0.14	-0.39	-0.38	0.25	0.33	-0.84	-0.63	-0.33	-0.46	0.24	0.09	-0.23	-0.77	-0.11	-0.3	-0.51	-0.29	-0.24	-0.04
E9PV66	Myo18b	Myosin XVIIIb OS=Mus musculus OX=10090 GN=Myo18b PE=1 SV=1	-6.32e+18	0	183.827	19	33	175	33	33	1	601.84	175	33	0	>tr|E9PV66|E9PV66_MOUSE Myosin XVIIIb OS=Mus musculus OX=10090 GN=Myo18b PE=1 SV=1	0.17	0.18	-0.02	-0.14	-0.19	-0.01	0.21	0.03	-0.23	-0.11	0.01	-0.19	-0.01	-0.2	-0.31	-0.08	0.01	-0.04	-0.19	0	0.12	-0.02	-0.11	-0.02	-0.06	-0.11	0.01	-0.18	0.04	-0.3	0.1	-0.18	0.04
P10126	Eef1a1	Elongation factor 1-alpha 1 OS=Mus musculus OX=10090 GN=Eef1a1 PE=1 SV=3	-4.38e+18	0	182.961	52	18	745	4	8	1	2190.09	745	18	0	>sp|P10126|EF1A1_MOUSE Elongation factor 1-alpha 1 OS=Mus musculus OX=10090 GN=Eef1a1 PE=1 SV=3	0.21	0.21	-0.24	0.12	-0.08	0.49	0.06	-0.3	0.15	-0.08	0.04	0.82	0.61	0.89	0.84	0.74	0.43	-0.03	-0.11	1.01	-0.02	0.14	-0.1	1	0.09	0.18	0.35	-0.22	0.04	0.76	-0.05	0.32	-0.06
P60843	Eif4a1	Eukaryotic initiation factor 4A-I OS=Mus musculus OX=10090 GN=Eif4a1 PE=1 SV=1	-1.61e+18	0	182.806	54	20	550	11	11	1	1923.69	550	20	0	>sp|P60843|IF4A1_MOUSE Eukaryotic initiation factor 4A-I OS=Mus musculus OX=10090 GN=Eif4a1 PE=1 SV=1	0.26	0.24	0.02	0.07	0.13	0.28	0.32	-0.04	0.08	0.33	0.12	0.27	0.07	-0.07	-0.05	0.31	-0.01	-0.1	-0.1	0.06	-0.09	0.18	0.03	0.31	0.23	0.1	-0.02	0.18	0	0.21	0.04	0.12	-0.01
P14211	Calr	Calreticulin OS=Mus musculus OX=10090 GN=Calr PE=1 SV=1	-6.48e+18	0	182.415	61	20	380	20	20	1	1355.83	380	20	0	>sp|P14211|CALR_MOUSE Calreticulin OS=Mus musculus OX=10090 GN=Calr PE=1 SV=1	0.29	0.33	0.05	0.07	-0.25	0.13	-0.21	-0.17	-0.16	-0.21	-0.08	0.11	-0.07	-0.19	0.04	0.13	0.02	0.11	0	-0.08	-0.3	0.09	-0.04	0.35	-0.08	0.23	-0.21	-0.26	-0.18	0.17	-0.07	0.08	-0.15
P08551	Nefl	Neurofilament light polypeptide OS=Mus musculus OX=10090 GN=Nefl PE=1 SV=5	-7.62e+18	0	182.072	55	25	366	23	23	1	1250.08	366	25	0	>sp|P08551|NFL_MOUSE Neurofilament light polypeptide OS=Mus musculus OX=10090 GN=Nefl PE=1 SV=5	0.6	-1.03	0.21	-0.21	-0.54	-0.26	-0.45	-0.19	0.46	-0.21	0.01	-0.02	-0.44	0.18	-0.01	-0.56	-0.98	-0.03	1.3	-0.63	-0.03	-0.37	0.1	-0.21	0.1	-0.16	-0.84	-0.19	-0.1	-0.65	-0.84	-0.84	-0.5
Q9D0I9	Rars	Arginine--tRNA ligase, cytoplasmic OS=Mus musculus OX=10090 GN=Rars PE=1 SV=2	2.16e+18	0	181.69	51	31	453	31	31	1	1456.14	453	31	0	>sp|Q9D0I9|SYRC_MOUSE Arginine--tRNA ligase, cytoplasmic OS=Mus musculus OX=10090 GN=Rars PE=1 SV=2	0.07	-0.11	0.13	0.15	-0.03	-0.11	-0.03	0.03	-0.11	-0.11	0.05	0.01	0.02	-0.09	-0.08	-0.07	0.08	0.26	0.14	-0.13	-0.16	0.03	0.03	-0.02	-0.09	0.06	-0.03	-0.02	0.03	-0.11	0.16	-0.02	0.14
P62196	Psmc5	26S proteasome regulatory subunit 8 OS=Mus musculus OX=10090 GN=Psmc5 PE=1 SV=1	7.41e+18	0	181.127	66	23	424	4	21	1	1456.97	424	23	1	>sp|P62196|PRS8_MOUSE 26S proteasome regulatory subunit 8 OS=Mus musculus OX=10090 GN=Psmc5 PE=1 SV=1	0.14	0.04	0.13	0.13	-0.05	0.04	0.01	0.03	-0.03	0.05	0.04	0.02	0.09	0.01	0.09	-0.02	0.02	0.22	0.05	-0.02	-0.04	-0.09	-0.12	0.01	-0.05	-0.08	-0.09	-0.02	-0.01	-0.02	0	-0.05	0.02
G5E8J6	Hrc	Histidine rich calcium binding protein, isoform CRA_a OS=Mus musculus OX=10090 GN=Hrc PE=1 SV=1	-1.31e+18	0	181.08	42	22	414	22	22	1	1359.29	414	22	0	>tr|G5E8J6|G5E8J6_MOUSE Histidine rich calcium binding protein, isoform CRA_a OS=Mus musculus OX=10090 GN=Hrc PE=1 SV=1	-0.3	-0.29	-0.19	-0.1	0.25	-0.01	0.11	0.25	-0.04	-0.05	-0.1	-0.2	-0.05	0.18	0.09	-0.07	-0.06	-0.1	-0.17	-0.33	-0.17	-0.2	-0.18	-0.35	-0.33	0.09	0.75	-0.08	-0.13	-0.24	-0.06	-0.15	-0.33
G3X914	Cul5	Isoform of Q9D5V5, Cullin-5 OS=Mus musculus OX=10090 GN=Cul5 PE=1 SV=1	-8.92e+17	0	180.581	38	31	430	0	30	1	1392.78	430	31	1	>tr|G3X914|G3X914_MOUSE Isoform of Q9D5V5, Cullin-5 OS=Mus musculus OX=10090 GN=Cul5 PE=1 SV=1	0.13	0.14	0.06	-0.02	0.05	0	0.06	0.13	-0.07	0.13	0.08	-0.07	-0.05	-0.12	-0.2	-0.14	-0.1	0.25	0.09	-0.23	-0.01	-0.1	-0.13	-0.15	-0.08	0.03	-0.04	0.07	-0.05	-0.16	0	-0.06	-0.04
Q9EQP2	Ehd4	EH domain-containing protein 4 OS=Mus musculus OX=10090 GN=Ehd4 PE=1 SV=1	4.04e+18	0	180.542	64	26	331	20	20	1	1029.47	331	26	1	>sp|Q9EQP2|EHD4_MOUSE EH domain-containing protein 4 OS=Mus musculus OX=10090 GN=Ehd4 PE=1 SV=1	-0.04	-0.22	-0.03	0.05	-0.07	-0.04	0.07	-0.22	-0.01	0.17	-0.1	0.08	-0.3	-0.36	-0.3	-0.18	-0.29	-0.22	-0.01	0	0.07	0.11	-0.02	-0.08	-0.07	-0.03	-0.36	-0.19	-0.32	-0.03	-0.25	-0.21	-0.08
A6ZI47	Aldoart2	Fructose-bisphosphate aldolase OS=Mus musculus OX=10090 GN=Aldoart2 PE=1 SV=1	5.05e+18	0	180.431	36	21	3116	2	2	1	10267.3	3116	21	1	>tr|A6ZI47|A6ZI47_MOUSE Fructose-bisphosphate aldolase OS=Mus musculus OX=10090 GN=Aldoart2 PE=1 SV=1	NaN	-0.04	-0.04	0.03	-0.1	-0.42	0	NaN	0.09	0.04	-0.37	-0.14	0.07	-0.02	-0.28	-0.17	-0.23	-0.03	0.07	0.08	NaN	0.2	0.16	-0.09	NaN	-0.49	0.05	NaN	0.16	NaN	0.03	NaN	0.03
P05201	Got1	Aspartate aminotransferase, cytoplasmic OS=Mus musculus OX=10090 GN=Got1 PE=1 SV=3	-3.72e+18	0	180.315	68	24	902	16	24	1	3233.32	902	24	0	>sp|P05201|AATC_MOUSE Aspartate aminotransferase, cytoplasmic OS=Mus musculus OX=10090 GN=Got1 PE=1 SV=3	-0.36	-0.17	0.1	0.22	0.43	0.09	0.04	0.35	0.33	0.2	0.17	-0.06	0.07	0.23	0.35	0.23	0.27	-0.29	0.05	-0.01	0.28	0.13	0.18	-0.02	0.33	0.36	0.06	0.6	0.1	0.07	0.05	0.11	0.12
Q9Z1Q9	Vars	Valine--tRNA ligase OS=Mus musculus OX=10090 GN=Vars PE=1 SV=1	8.59e+18	0	180.078	29	31	394	3	31	1	1287.04	394	31	0	>sp|Q9Z1Q9|SYVC_MOUSE Valine--tRNA ligase OS=Mus musculus OX=10090 GN=Vars PE=1 SV=1	-0.06	-0.16	0.15	0.15	-0.06	-0.06	0.06	0.09	0.04	0.09	-0.04	0.01	0.02	-0.06	-0.13	-0.11	0.03	0.04	-0.02	0.21	-0.02	0.02	0.07	-0.05	-0.11	0.02	0.44	-0.01	-0.05	0.01	0.07	-0.01	0.05
Q91VB8	Hba-a1	Isoform of P01942, Alpha globin 1 OS=Mus musculus OX=10090 GN=Hba-a1 PE=1 SV=1	-5.04e+18	0	179.901	90	12	1623	2	2	1	4105.5	1623	12	0	>tr|Q91VB8|Q91VB8_MOUSE Isoform of P01942, Alpha globin 1 OS=Mus musculus OX=10090 GN=Hba-a1 PE=1 SV=1	-0.6	-0.39	1.03	0.95	0.45	1.04	1.41	1.26	0.96	0.84	0.18	-0.27	0.19	0.67	0.46	0.13	0.17	-1.09	-2.21	-2.4	-1.63	-1.5	-0.85	-0.11	-0.17	-0.38	-0.3	0.4	-0.11	0.16	0.01	0.43	0.47
O88844	Idh1	Isocitrate dehydrogenase [NADP] cytoplasmic OS=Mus musculus OX=10090 GN=Idh1 PE=1 SV=2	-4.4e+18	0	179.727	59	22	413	12	21	1	1511.85	413	22	0	>sp|O88844|IDHC_MOUSE Isocitrate dehydrogenase [NADP] cytoplasmic OS=Mus musculus OX=10090 GN=Idh1 PE=1 SV=2	-0.09	-0.05	-0.03	0.22	0.14	0.32	0.11	-0.21	0.39	0.14	0.03	0.28	0.19	0.4	0.61	0.34	0.08	-0.6	-0.53	0.39	-0.16	0.51	0.49	0.41	0.17	0	0.09	0.02	-0.07	0.22	-0.12	0.17	-0.19
P04247	Mb	Myoglobin OS=Mus musculus OX=10090 GN=Mb PE=1 SV=3	2.79e+18	0	179.694	56	10	1682	0	10	1	6786.95	1682	10	0	>sp|P04247|MYG_MOUSE Myoglobin OS=Mus musculus OX=10090 GN=Mb PE=1 SV=3	-1.01	-0.65	-0.09	0.07	0.34	-0.52	-0.48	0.31	-0.12	-0.52	-0.05	-0.51	-0.3	-0.21	0.07	0.02	-0.14	-1.05	-0.24	0.3	0.42	0.15	0.21	-0.86	0.06	0.16	-0.24	0.46	0.04	-0.21	-0.38	-0.08	-0.07
Q9Z1T2	Thbs4	Thrombospondin-4 OS=Mus musculus OX=10090 GN=Thbs4 PE=1 SV=1	-5.57e+18	0	179.599	35	23	336	21	21	1	1182.34	336	23	2	>sp|Q9Z1T2|TSP4_MOUSE Thrombospondin-4 OS=Mus musculus OX=10090 GN=Thbs4 PE=1 SV=1	0.51	1.01	-0.01	-0.9	-0.57	-0.32	-0.55	-0.59	-1.09	-0.79	-0.28	0.24	-1	-0.5	-0.42	-0.49	-0.43	-1.48	-0.13	-0.39	0.08	-0.58	-0.1	-1.05	0.16	0.11	0.55	-0.39	0.44	-0.22	-0.38	-0.24	-0.13
P08553	Nefm	Neurofilament medium polypeptide OS=Mus musculus OX=10090 GN=Nefm PE=1 SV=4	-4.83e+18	0	179.299	38	29	432	1	27	1	1419.61	432	29	1	>sp|P08553|NFM_MOUSE Neurofilament medium polypeptide OS=Mus musculus OX=10090 GN=Nefm PE=1 SV=4	0.56	-1.08	0.12	-0.21	-0.58	-0.5	-0.35	-0.18	0.42	-0.33	-0.04	-0.14	-0.36	0	-0.01	-0.51	-0.66	-0.03	1.12	-0.5	-0.04	-0.14	0.08	-0.18	0.11	-0.07	-0.77	-0.11	-0.09	-0.58	-0.66	-0.75	-0.41
Q91YT0	Ndufv1	NADH dehydrogenase [ubiquinone] flavoprotein 1, mitochondrial OS=Mus musculus OX=10090 GN=Ndufv1 PE=1 SV=1	-3.42e+17	0	179.286	63	20	697	0	20	1	2299.07	697	20	0	>sp|Q91YT0|NDUV1_MOUSE NADH dehydrogenase [ubiquinone] flavoprotein 1, mitochondrial OS=Mus musculus OX=10090 GN=Ndufv1 PE=1 SV=1	-0.35	-0.32	0.02	0.13	0.17	-0.12	0.14	0	0.17	0.17	-0.04	-0.19	0.15	0.15	0.35	0.04	0.14	-0.1	0.1	0.01	0.2	0.06	0.09	-0.18	0.2	0.08	0.09	0.12	0.11	0.09	0.14	0.23	0.26
Q78PY7	Snd1	Staphylococcal nuclease domain-containing protein 1 OS=Mus musculus OX=10090 GN=Snd1 PE=1 SV=1	-6.15e+18	0	178.99	42	32	264	11	32	1	898.27	264	32	0	>sp|Q78PY7|SND1_MOUSE Staphylococcal nuclease domain-containing protein 1 OS=Mus musculus OX=10090 GN=Snd1 PE=1 SV=1	0.08	-0.02	0.04	0.04	-0.05	0.03	0.05	-0.08	0.02	0.12	-0.08	0.08	0.1	-0.01	0.14	0.11	0.23	-0.04	-0.23	0.05	0.04	0.06	-0.06	0.01	-0.04	-0.08	0.12	-0.07	-0.04	0.15	-0.05	-0.05	-0.04
Q6P9Q4	Fhod1	FH1/FH2 domain-containing protein 1 OS=Mus musculus OX=10090 GN=Fhod1 PE=1 SV=3	-8.19e+18	0	177.765	30	25	243	25	25	1	814.24	243	25	0	>sp|Q6P9Q4|FHOD1_MOUSE FH1/FH2 domain-containing protein 1 OS=Mus musculus OX=10090 GN=Fhod1 PE=1 SV=3	0.29	0.32	0.33	0.16	-0.05	0.02	0.25	0.01	0.24	0.23	0.06	-0.04	-0.04	-0.1	-0.13	0.02	0.16	0.02	-0.02	-0.13	0.04	-0.03	0.1	0	0	0.17	0.83	0.08	0.24	-0.01	0.28	0	0.14
Q9D6Y9	Gbe1	1,4-alpha-glucan-branching enzyme OS=Mus musculus OX=10090 GN=Gbe1 PE=1 SV=1	-3.78e+18	0	176.805	42	23	326	0	23	1	1183.19	326	23	0	>sp|Q9D6Y9|GLGB_MOUSE 1,4-alpha-glucan-branching enzyme OS=Mus musculus OX=10090 GN=Gbe1 PE=1 SV=1	-0.38	-0.26	-0.25	-0.1	0.19	-0.17	0.22	0.07	0.36	0.31	0.01	-0.1	0.02	0.25	0.32	-0.21	-0.25	-0.58	-0.28	0.24	0.4	0.1	0.05	-0.04	0.33	-0.12	0.07	-0.01	0.05	0.03	-0.14	0.01	-0.07
D3Z7H8	Cilp2	Cartilage intermediate layer protein 2 OS=Mus musculus OX=10090 GN=Cilp2 PE=1 SV=1	-8.26e+18	0	176.605	24	18	225	18	18	1	862.56	225	18	0	>sp|D3Z7H8|CILP2_MOUSE Cartilage intermediate layer protein 2 OS=Mus musculus OX=10090 GN=Cilp2 PE=1 SV=1	0.27	1.03	-0.21	-0.79	-0.27	-0.54	-0.44	-0.53	-0.69	-0.79	-0.25	0.09	-0.87	-0.08	-0.55	-0.64	-0.56	-1.08	-0.45	-0.3	0.24	-0.21	0.43	-1.09	0.34	-0.05	0.7	-0.43	0.29	-0.41	-0.16	-0.15	-0.06
P70302	Stim1	Stromal interaction molecule 1 OS=Mus musculus OX=10090 GN=Stim1 PE=1 SV=2	5.32e+18	0	176.517	47	24	370	1	1	1	1205.01	370	24	0	>sp|P70302|STIM1_MOUSE Stromal interaction molecule 1 OS=Mus musculus OX=10090 GN=Stim1 PE=1 SV=2	-0.37	NaN	NaN	-0.07	NaN	NaN	-0.07	0.32	NaN	NaN	NaN	-0.15	-0.09	NaN	-0.25	-0.12	0.28	0.28	-0.14	0.18	0.41	-0.17	0.19	-0.45	0	-1.07	NaN	0.08	0.13	0.06	-0.03	-0.05	0.06
O88544	Cops4	COP9 signalosome complex subunit 4 OS=Mus musculus OX=10090 GN=Cops4 PE=1 SV=1	-4.52e+18	0	176.515	68	21	390	6	21	1	1493.6	390	21	0	>sp|O88544|CSN4_MOUSE COP9 signalosome complex subunit 4 OS=Mus musculus OX=10090 GN=Cops4 PE=1 SV=1	0.12	0.03	0.01	0	0.01	-0.14	-0.11	0.04	-0.25	-0.13	-0.03	-0.04	-0.04	-0.09	-0.21	-0.12	0.01	0.12	0.08	-0.18	-0.03	-0.08	-0.1	-0.2	-0.17	0.04	-0.23	-0.01	-0.14	-0.2	-0.01	-0.07	0.03
P47754	Capza2	F-actin-capping protein subunit alpha-2 OS=Mus musculus OX=10090 GN=Capza2 PE=1 SV=3	5.69e+18	0	175.43	70	13	775	3	11	1	3654.21	775	13	2	>sp|P47754|CAZA2_MOUSE F-actin-capping protein subunit alpha-2 OS=Mus musculus OX=10090 GN=Capza2 PE=1 SV=3	0.25	0.26	0.2	0.14	0.15	0.08	0.08	0.11	0.01	0.13	0.28	0.09	0.07	0.11	0.07	0.11	0.2	0.22	0.18	-0.12	0.04	-0.03	-0.07	0.15	0.09	0.08	-0.47	0.05	-0.01	-0.11	0.15	0.06	0.08
Q99LC5	Etfa	Electron transfer flavoprotein subunit alpha, mitochondrial OS=Mus musculus OX=10090 GN=Etfa PE=1 SV=2	-9.18e+18	0	175.421	61	15	688	15	15	1	2712.81	688	15	0	>sp|Q99LC5|ETFA_MOUSE Electron transfer flavoprotein subunit alpha, mitochondrial OS=Mus musculus OX=10090 GN=Etfa PE=1 SV=2	-0.36	-0.2	-0.19	-0.07	0.11	-0.13	0.06	0.16	0.36	0.01	0.06	-0.21	0.22	0.3	0.68	0.25	0	-0.3	0.05	0.14	0.22	0.05	-0.04	0.07	0.28	0	-0.05	0.2	-0.02	0.11	-0.09	0.18	0
P70168	Kpnb1	Importin subunit beta-1 OS=Mus musculus OX=10090 GN=Kpnb1 PE=1 SV=2	5.49e+18	0	175.379	33	24	399	24	24	1	1426.33	399	24	0	>sp|P70168|IMB1_MOUSE Importin subunit beta-1 OS=Mus musculus OX=10090 GN=Kpnb1 PE=1 SV=2	0.07	0.02	-0.03	-0.01	-0.01	-0.01	0.09	0.13	0.09	0.13	0.02	-0.02	-0.06	-0.11	-0.15	0.06	0.03	0.04	-0.06	0.08	-0.04	0.02	-0.03	0.06	-0.09	0.01	-0.26	0.07	-0.02	-0.09	-0.04	-0.08	0.06
Q9JHI5	Ivd	Isovaleryl-CoA dehydrogenase, mitochondrial OS=Mus musculus OX=10090 GN=Ivd PE=1 SV=1	-1.08e+18	0	175.086	44	17	463	17	17	1	1646.82	463	17	0	>sp|Q9JHI5|IVD_MOUSE Isovaleryl-CoA dehydrogenase, mitochondrial OS=Mus musculus OX=10090 GN=Ivd PE=1 SV=1	-0.35	-0.25	0.17	0.25	0.48	0.42	0.09	0.41	0.15	0.12	0.29	0.15	0.17	0.33	0.43	0.22	0.08	-0.27	-0.19	-1.48	-1.13	-1.14	-1.34	0.28	0.27	0.27	0.37	0.57	0.22	0.19	0.28	0.45	0.2
P13020	Gsn	Gelsolin OS=Mus musculus OX=10090 GN=Gsn PE=1 SV=3	5.45e+18	0	175.069	41	22	422	0	22	1	1729.76	422	22	0	>sp|P13020|GELS_MOUSE Gelsolin OS=Mus musculus OX=10090 GN=Gsn PE=1 SV=3	0.13	0.13	0.02	-0.09	-0.05	0.15	-0.27	-0.25	-0.16	-0.26	0.1	0.4	-0.14	0.17	0.18	-0.08	-0.14	-0.17	-0.13	0.3	-0.09	0.1	0.18	0.24	0.01	0.03	0.24	0	-0.01	0.03	-0.22	-0.04	-0.09
P42932	Cct8	T-complex protein 1 subunit theta OS=Mus musculus OX=10090 GN=Cct8 PE=1 SV=3	1.64e+18	0	174.995	57	27	519	0	27	1	1652.68	519	27	0	>sp|P42932|TCPQ_MOUSE T-complex protein 1 subunit theta OS=Mus musculus OX=10090 GN=Cct8 PE=1 SV=3	0.03	-0.08	0.07	0.06	-0.06	0.04	0.12	-0.06	0.03	0.02	0.08	0.06	-0.04	-0.05	-0.13	-0.07	0.01	0.21	0.12	-0.05	-0.07	-0.05	-0.06	0.05	-0.06	0	-0.13	-0.11	0.02	0.06	0.11	0	0.1
A2AKD7	Snta1	Isoform of Q61234, Alpha-1-syntrophin OS=Mus musculus OX=10090 GN=Snta1 PE=1 SV=1	-4.09e+18	0	174.977	47	17	486	1	16	1	1952.56	486	17	0	>tr|A2AKD7|A2AKD7_MOUSE Isoform of Q61234, Alpha-1-syntrophin OS=Mus musculus OX=10090 GN=Snta1 PE=1 SV=1	0.25	0.24	0.17	0.16	0.28	0.2	-0.12	-0.01	-0.22	-0.08	0.24	0.12	-0.23	-0.19	-0.21	0.01	0.05	0.1	0.02	-0.08	0.1	-0.05	-0.11	-0.1	-0.04	0.22	0.31	0.34	-0.06	-0.22	-0.08	-0.08	0.27
A0A1Y7VL34	Dtna	Isoform of Q9D2N4, Dystrobrevin OS=Mus musculus OX=10090 GN=Dtna PE=1 SV=1	6.04e+17	0	174.455	43	24	309	0	24	1	1006.18	309	24	0	>tr|A0A1Y7VL34|A0A1Y7VL34_MOUSE Isoform of Q9D2N4, Dystrobrevin OS=Mus musculus OX=10090 GN=Dtna PE=1 SV=1	0.22	0.22	0.23	0.1	0.15	-0.06	0.12	0.05	0.02	0.15	0.08	-0.16	-0.03	-0.12	-0.25	-0.14	-0.08	-0.12	-0.1	-0.16	0.09	-0.06	-0.11	-0.09	-0.01	0.32	0.14	0.17	-0.01	-0.16	-0.04	-0.06	0.21
A0A1B0GSG5	Rnh1	Isoform of Q91VI7, Ribonuclease inhibitor OS=Mus musculus OX=10090 GN=Rnh1 PE=1 SV=1	-4.83e+18	0	174.221	63	19	351	0	19	1	1475.23	351	19	0	>tr|A0A1B0GSG5|A0A1B0GSG5_MOUSE Isoform of Q91VI7, Ribonuclease inhibitor OS=Mus musculus OX=10090 GN=Rnh1 PE=1 SV=1	0.23	0.12	0.09	0.04	0.04	0.18	0.01	-0.02	-0.01	0.03	0.13	0.14	0.01	-0.06	-0.29	0.12	0.01	0.16	0.19	-0.21	-0.08	-0.13	-0.12	-0.36	-0.11	-0.01	-0.18	-0.02	-0.06	-0.06	0.07	0.03	0.14
F8WHL2	Copa	Isoform of Q8CIE6, Coatomer subunit alpha OS=Mus musculus OX=10090 GN=Copa PE=1 SV=1	5.8e+18	0	174.021	31	30	269	0	30	1	891.22	269	30	0	>tr|F8WHL2|F8WHL2_MOUSE Isoform of Q8CIE6, Coatomer subunit alpha OS=Mus musculus OX=10090 GN=Copa PE=1 SV=1	0.11	0.04	-0.12	0.12	-0.12	0.01	-0.08	-0.08	-0.09	-0.02	-0.25	0.13	-0.11	-0.17	0.13	0.06	-0.27	0.06	-0.01	0.17	0.03	0.05	0.03	0.03	-0.02	-0.38	0.04	-0.11	0.06	0.15	0.04	0	-0.04
A0A1B0GRA5	Stim1	Isoform of P70302, Stromal interaction molecule 1 OS=Mus musculus OX=10090 GN=Stim1 PE=1 SV=1	-3.15e+18	0	173.501	40	24	380	1	1	1	1248.45	380	24	26	>tr|A0A1B0GRA5|A0A1B0GRA5_MOUSE Isoform of P70302, Stromal interaction molecule 1 OS=Mus musculus OX=10090 GN=Stim1 PE=1 SV=1	-0.22	-0.13	-0.06	-0.08	0.02	-0.19	0.04	0.11	-0.01	0.38	0	-0.04	-0.09	-0.14	-0.1	-0.21	-0.1	0.03	0.08	-0.08	0.01	0.01	-0.03	-0.13	-0.06	-0.13	0	0.08	0.01	-0.08	0	0.02	0.02
Q8VDC1	Fyco1	FYVE and coiled-coil domain-containing protein 1 OS=Mus musculus OX=10090 GN=Fyco1 PE=1 SV=1	-5.27e+18	0	173.442	31	32	205	7	32	1	671.88	205	32	0	>sp|Q8VDC1|FYCO1_MOUSE FYVE and coiled-coil domain-containing protein 1 OS=Mus musculus OX=10090 GN=Fyco1 PE=1 SV=1	-0.27	-0.2	0.07	0.01	0.04	-0.07	0.09	0.09	0.06	0.22	0.04	-0.14	-0.05	-0.15	0.02	-0.15	0.12	-0.11	0.09	-0.07	0.14	0.17	0.08	-0.07	-0.07	0.11	-0.13	-0.03	0	-0.1	-0.01	0.01	0.03
P50396	Gdi1	Rab GDP dissociation inhibitor alpha OS=Mus musculus OX=10090 GN=Gdi1 PE=1 SV=3	2.48e+18	0	173.324	59	21	394	8	16	1	1609.66	394	21	0	>sp|P50396|GDIA_MOUSE Rab GDP dissociation inhibitor alpha OS=Mus musculus OX=10090 GN=Gdi1 PE=1 SV=3	0.13	0.18	0.03	0.06	-1.63	-1.66	-0.02	0.1	0.14	0.08	0.17	0.06	0.21	0.17	0.11	0.17	0.2	-0.17	-0.11	0.02	0.03	-0.08	0	0.2	0.18	0.22	0.04	0.08	-0.02	0.02	0.07	0.11	-0.19
A6H644	Ppp1r12b	Isoform of Q8BG95, MCG130490 OS=Mus musculus OX=10090 GN=Ppp1r12b PE=1 SV=1	-4.99e+18	0	173.307	32	28	271	1	27	1	915.49	271	28	1	>tr|A6H644|A6H644_MOUSE Isoform of Q8BG95, MCG130490 OS=Mus musculus OX=10090 GN=Ppp1r12b PE=1 SV=1	-0.64	-0.27	0.16	0.25	0.33	0.16	0.45	-0.02	0.15	0.23	0.16	0.13	0.2	-0.03	0.42	0.22	0	0.2	0.3	-0.16	-0.06	-0.32	-0.18	0.2	0.31	-0.19	-0.1	0.24	0.15	0.14	0.11	0.1	-0.05
P14685	Psmd3	26S proteasome non-ATPase regulatory subunit 3 OS=Mus musculus OX=10090 GN=Psmd3 PE=1 SV=3	5.03e+18	0	172.664	50	25	357	15	25	1	1155.94	357	25	0	>sp|P14685|PSMD3_MOUSE 26S proteasome non-ATPase regulatory subunit 3 OS=Mus musculus OX=10090 GN=Psmd3 PE=1 SV=3	0.18	0	0.03	0.04	-0.05	-0.06	0.06	0.08	-0.06	0.1	0	-0.02	0.05	-0.06	-0.08	-0.11	-0.06	0.09	0.07	-0.16	0.07	-0.04	-0.1	-0.05	0.01	0.17	-0.21	-0.04	-0.16	-0.09	0.05	-0.03	0
Q8JZN5	Acad9	Acyl-CoA dehydrogenase family member 9, mitochondrial OS=Mus musculus OX=10090 GN=Acad9 PE=1 SV=2	5.39e+18	0	172.424	50	24	299	14	24	1	1111.62	299	24	0	>sp|Q8JZN5|ACAD9_MOUSE Acyl-CoA dehydrogenase family member 9, mitochondrial OS=Mus musculus OX=10090 GN=Acad9 PE=1 SV=2	-0.22	-0.25	0.08	-0.04	0.2	0.15	-0.1	0.18	-0.23	0.03	0	-0.19	0.21	0.16	0.1	0.04	0.04	-0.03	0.05	0.09	0.03	-0.05	-0.11	-0.27	0.04	0.24	-0.18	0.23	0.09	0.11	0.15	0.18	0.22
Q9CRA2	Pdlim5	Isoform of Q8CI51, PDZ and LIM domain protein 5 OS=Mus musculus OX=10090 GN=Pdlim5 PE=1 SV=1	3.06e+18	0	171.866	68	16	1108	2	6	1	4269.74	1108	16	12	>tr|Q9CRA2|Q9CRA2_MOUSE Isoform of Q8CI51, PDZ and LIM domain protein 5 OS=Mus musculus OX=10090 GN=Pdlim5 PE=1 SV=1	0.06	0.08	0.04	0.01	0.21	-0.04	0.04	0.02	0.05	0.04	0.2	-0.11	-0.06	-0.06	0.2	0	-0.01	-0.07	0.04	0.14	0.38	0.02	-0.03	0.12	0.23	0.14	0.02	0.27	0.07	-0.09	-0.02	-0.01	0.04
A2ACG7	Rpn2	Isoform of Q9DBG6, Dolichyl-diphosphooligosaccharide--protein glycosyltransferase subunit 2 OS=Mus musculus OX=10090 GN=Rpn2 PE=1 SV=1	2.47e+18	0	170.96	49	21	335	1	21	1	1364.03	335	21	0	>tr|A2ACG7|A2ACG7_MOUSE Isoform of Q9DBG6, Dolichyl-diphosphooligosaccharide--protein glycosyltransferase subunit 2 OS=Mus musculus OX=10090 GN=Rpn2 PE=1 SV=1	0.07	0.17	-0.1	-0.05	0.02	0.22	-0.07	0.02	0.03	0.1	-0.07	0.05	-0.07	-0.24	-0.15	-0.02	0	0.22	0.09	-0.23	-0.11	-0.16	-0.22	-0.12	-0.18	-0.02	-0.19	-0.17	-0.22	-0.14	-0.07	-0.14	-0.01
Q8VDJ3	Hdlbp	Vigilin OS=Mus musculus OX=10090 GN=Hdlbp PE=1 SV=1	-3.95e+18	0	170.891	36	35	326	2	35	1	1153.12	326	35	0	>sp|Q8VDJ3|VIGLN_MOUSE Vigilin OS=Mus musculus OX=10090 GN=Hdlbp PE=1 SV=1	-0.05	-0.06	-0.01	0.03	0	-0.01	-0.1	-0.04	-0.12	-0.03	-0.18	-0.03	-0.13	-0.13	-0.05	-0.09	-0.04	-0.08	-0.12	0.24	-0.05	-0.02	0.07	-0.05	-0.21	0.07	-0.01	-0.16	0.02	-0.07	-0.07	-0.26	-0.03
K3W4S6	Gyg	Isoform of Q9R062, Glycogenin OS=Mus musculus OX=10090 GN=Gyg PE=1 SV=1	-8.11e+17	0	170.763	38	11	484	0	11	1	1820.39	484	11	0	>tr|K3W4S6|K3W4S6_MOUSE Isoform of Q9R062, Glycogenin OS=Mus musculus OX=10090 GN=Gyg PE=1 SV=1	-0.25	-0.09	-0.08	-0.09	-0.03	-0.34	0.04	0	0.08	0.22	0.01	-0.13	-0.11	-0.05	0.14	-0.02	0	-0.07	-0.11	-0.23	-0.13	0.02	-0.01	-0.11	-0.14	-0.07	-0.25	0.11	-0.1	-0.13	-0.05	-0.15	-0.04
O54724	Cavin1	Caveolae-associated protein 1 OS=Mus musculus OX=10090 GN=Cavin1 PE=1 SV=1	-6.64e+18	0	170.621	51	18	746	18	18	1	2722.47	746	18	0	>sp|O54724|CAVN1_MOUSE Caveolae-associated protein 1 OS=Mus musculus OX=10090 GN=Cavin1 PE=1 SV=1	-0.06	0.09	-0.07	0.08	0.04	0.17	0.08	-0.09	0.31	0.1	0.07	0.13	0.21	0.31	0.52	0.41	-0.04	-0.08	0.05	0.27	0.07	0.16	-0.01	0.29	0.18	-0.02	-0.04	0.03	0	0.15	-0.08	0.16	-0.12
P16332	Mut	Methylmalonyl-CoA mutase, mitochondrial OS=Mus musculus OX=10090 GN=Mut PE=1 SV=2	-9.01e+17	0	170.552	41	21	238	21	21	1	884.84	238	21	0	>sp|P16332|MUTA_MOUSE Methylmalonyl-CoA mutase, mitochondrial OS=Mus musculus OX=10090 GN=Mut PE=1 SV=2	-0.23	-0.19	-0.36	-0.21	-0.12	-0.14	-0.11	-0.02	0.16	-0.01	-0.37	-0.48	0.07	0.05	0.42	0	-0.31	-0.1	0.17	0.21	0.21	-0.17	-0.31	0.01	-0.08	-0.04	-0.12	-0.02	-0.22	-0.03	-0.33	-0.02	-0.17
Q3U7R1	Esyt1	Extended synaptotagmin-1 OS=Mus musculus OX=10090 GN=Esyt1 PE=1 SV=2	-6.79e+18	0	169.793	37	28	293	8	28	1	1027.96	293	28	0	>sp|Q3U7R1|ESYT1_MOUSE Extended synaptotagmin-1 OS=Mus musculus OX=10090 GN=Esyt1 PE=1 SV=2	0.07	0.15	0.11	0.21	0.04	0.3	0.1	-0.04	0.34	0.13	0.02	0.42	0.22	0.52	0.57	0.41	0.15	-0.09	-0.16	0.53	0.21	-0.07	0.01	0.49	0.11	0.19	0.37	0.05	0.19	0.4	0.19	0.32	0.09
Q8BG32	Psmd11	26S proteasome non-ATPase regulatory subunit 11 OS=Mus musculus OX=10090 GN=Psmd11 PE=1 SV=3	-8.31e+18	0	169.761	62	23	408	0	23	1	1323.61	408	23	0	>sp|Q8BG32|PSD11_MOUSE 26S proteasome non-ATPase regulatory subunit 11 OS=Mus musculus OX=10090 GN=Psmd11 PE=1 SV=3	0.02	-0.01	0.09	0.08	-0.03	-0.01	0.06	0.03	-0.03	0.1	0.12	0.01	0.08	-0.04	-0.06	-0.01	0.05	0.13	0.03	-0.06	0.01	-0.1	-0.09	0.02	-0.02	0.11	-0.2	0	-0.04	-0.12	0.07	-0.03	0.1
A0A1B0GSX6	Pdlim3	Isoform of O70209, PDZ and LIM domain 3, isoform CRA_a OS=Mus musculus OX=10090 GN=Pdlim3 PE=1 SV=1	4.29e+16	0	169.743	56	14	639	3	3	1	2396.73	639	14	13	>tr|A0A1B0GSX6|A0A1B0GSX6_MOUSE Isoform of O70209, PDZ and LIM domain 3, isoform CRA_a OS=Mus musculus OX=10090 GN=Pdlim3 PE=1 SV=1	0.26	0.14	0.27	0.09	-0.18	0.09	0.19	-0.16	-0.02	0.02	0.13	-0.08	0.05	-0.12	-0.25	-0.09	0.2	0.08	0.03	-0.18	0.14	-0.21	-0.16	-0.01	0.1	0.24	-0.23	-0.05	-0.18	-0.23	-0.09	-0.12	0.17
Q9D1A2	Cndp2	Cytosolic non-specific dipeptidase OS=Mus musculus OX=10090 GN=Cndp2 PE=1 SV=1	8.77e+18	0	169.452	62	20	316	20	20	1	1165.44	316	20	0	>sp|Q9D1A2|CNDP2_MOUSE Cytosolic non-specific dipeptidase OS=Mus musculus OX=10090 GN=Cndp2 PE=1 SV=1	0.06	0.05	0.19	0.18	0.06	0.11	-0.01	0.12	0.08	-0.04	0.15	0.29	0.12	0.24	0.11	0.1	0.06	-0.02	-0.12	0.11	-0.04	0	0.03	0.25	-0.02	0.05	0.01	-0.01	-0.01	0.23	0.07	0.19	-0.03
P80315	Cct4	T-complex protein 1 subunit delta OS=Mus musculus OX=10090 GN=Cct4 PE=1 SV=3	-1.19e+18	0	169.353	62	24	408	0	23	1	1432.79	408	24	0	>sp|P80315|TCPD_MOUSE T-complex protein 1 subunit delta OS=Mus musculus OX=10090 GN=Cct4 PE=1 SV=3	-0.01	-0.06	0.03	0.05	-0.05	-0.05	0.16	-0.07	-0.02	0.1	0.13	0.11	-0.06	-0.37	-0.29	0.01	0.09	0.18	0.17	-0.08	-0.01	0	0.13	-0.18	-0.06	-0.01	-0.11	-0.13	0.04	-0.06	0.23	-0.02	0.04
Q8R5H1-5	Usp15	Isoform of Q8R5H1, Isoform 5 of Ubiquitin carboxyl-terminal hydrolase 15 OS=Mus musculus OX=10090 GN=Usp15	7.17e+18	0	169.265	36	29	289	0	28	1	926.07	289	29	1	>sp|Q8R5H1-5|UBP15_MOUSE Isoform of Q8R5H1, Isoform 5 of Ubiquitin carboxyl-terminal hydrolase 15 OS=Mus musculus OX=10090 GN=Usp15	0.14	0.12	0.17	-0.02	-0.04	0.11	0.12	0.02	-0.05	0	0.05	-0.1	0.05	-0.04	-0.17	0.12	0.1	0.14	0.06	-0.02	0.03	0.04	-0.19	-0.03	0.05	-0.06	0.06	0	0.05	-0.12	0.04	0	0.03
Q5SVJ0	Camk2b	Isoform of P28652, Calcium/calmodulin-dependent protein kinase II, beta, isoform CRA_b OS=Mus musculus OX=10090 GN=Camk2b PE=1 SV=1	-4.78e+18	0	169.118	42	21	373	1	16	1	1314.58	373	21	7	>tr|Q5SVJ0|Q5SVJ0_MOUSE Isoform of P28652, Calcium/calmodulin-dependent protein kinase II, beta, isoform CRA_b OS=Mus musculus OX=10090 GN=Camk2b PE=1 SV=1	0.39	0.42	-0.03	-0.05	-0.12	-0.06	0.03	0.01	-0.2	-0.23	0.18	-0.1	-0.15	-0.38	-0.19	0.14	0.12	0.09	0.04	-0.24	0.1	-0.2	-0.18	0.06	0.2	0.23	0.16	-0.03	-0.17	-0.21	-0.05	-0.16	-0.05
O70318	Epb41l2	Band 4.1-like protein 2 OS=Mus musculus OX=10090 GN=Epb41l2 PE=1 SV=2	-4.71e+18	0	168.91	40	32	274	0	29	1	1058.89	274	32	3	>sp|O70318|E41L2_MOUSE Band 4.1-like protein 2 OS=Mus musculus OX=10090 GN=Epb41l2 PE=1 SV=2	0.02	-0.28	-0.1	-0.09	-0.1	0.23	-0.17	-0.22	0.06	-0.19	-0.16	0.2	-0.08	0.26	0.23	0.06	-0.34	-0.08	0.31	0.05	-0.04	-0.1	0.05	0.13	-0.04	-0.24	-0.02	-0.17	-0.09	-0.1	-0.29	-0.21	-0.29
B7ZNL3	Tpm1	Isoform of P58771, Tpm1 protein OS=Mus musculus OX=10090 GN=Tpm1 PE=1 SV=1	6.28e+18	0	168.883	69	31	7257	0	1	1	18537.7	7257	31	0	>tr|B7ZNL3|B7ZNL3_MOUSE Isoform of P58771, Tpm1 protein OS=Mus musculus OX=10090 GN=Tpm1 PE=1 SV=1	-0.2	-0.63	-0.35	-0.2	-0.37	-0.42	-0.21	-0.23	0.12	-0.15	0.1	0.14	0.03	0.1	-0.3	-0.33	0.14	0	-0.16	0.09	0.13	-0.11	0.53	-0.14	-0.1	-0.48	-0.12	-0.07	-0.11	0.1	-0.18	-0.17	-0.19
Q64518	Atp2a3	Sarcoplasmic/endoplasmic reticulum calcium ATPase 3 OS=Mus musculus OX=10090 GN=Atp2a3 PE=1 SV=3	-2.32e+18	0	168.8	13	14	3376	0	1	1	11990.4	3376	14	0	>sp|Q64518|AT2A3_MOUSE Sarcoplasmic/endoplasmic reticulum calcium ATPase 3 OS=Mus musculus OX=10090 GN=Atp2a3 PE=1 SV=3	NaN	NaN	0.52	NaN	NaN	NaN	NaN	NaN	NaN	NaN	0.11	NaN	NaN	0.29	NaN	NaN	NaN	NaN	NaN	NaN	NaN	NaN	NaN	NaN	NaN	NaN	1.1	NaN	NaN	NaN	NaN	NaN	NaN
O70400	Pdlim1	PDZ and LIM domain protein 1 OS=Mus musculus OX=10090 GN=Pdlim1 PE=1 SV=4	-6.3e+18	0	168.718	69	16	253	7	16	1	933.96	253	16	0	>sp|O70400|PDLI1_MOUSE PDZ and LIM domain protein 1 OS=Mus musculus OX=10090 GN=Pdlim1 PE=1 SV=4	-0.61	-0.34	-0.18	0.16	-0.02	-0.26	0.53	-0.25	0.21	0.12	-0.03	-0.12	-0.19	0	0.32	0.09	0	-0.57	-0.09	0.05	0.09	0.28	0.44	-0.19	0.42	0.01	0.24	0.17	0.08	0.2	-0.15	0.19	0.49
P21107	Tpm3	Tropomyosin alpha-3 chain OS=Mus musculus OX=10090 GN=Tpm3 PE=1 SV=3	4.86e+18	0	168.481	65	26	5037	0	3	1	12751.6	5037	26	10	>sp|P21107|TPM3_MOUSE Tropomyosin alpha-3 chain OS=Mus musculus OX=10090 GN=Tpm3 PE=1 SV=3	-1.4	-0.78	-0.92	-0.44	0.01	-0.26	0.49	-0.21	-0.15	-0.03	-0.13	-1.02	-0.4	0.09	1.02	-0.21	-0.59	-1.96	-1.03	-0.19	-0.51	0.34	0.91	-0.5	0.38	-0.32	0.01	-0.09	-0.33	-0.42	-0.31	0.2	0.38
Q3ULD5	Mccc2	Methylcrotonoyl-CoA carboxylase beta chain, mitochondrial OS=Mus musculus OX=10090 GN=Mccc2 PE=1 SV=1	-6.33e+18	0	168.474	53	22	371	11	22	1	1413.51	371	22	0	>sp|Q3ULD5|MCCB_MOUSE Methylcrotonoyl-CoA carboxylase beta chain, mitochondrial OS=Mus musculus OX=10090 GN=Mccc2 PE=1 SV=1	-0.36	-0.29	0.12	0.22	0.27	0.21	0.15	0.23	0.45	0.23	0	0.02	0.39	0.57	0.73	0.28	0.12	0.12	0.24	0.07	-0.1	0.29	0.22	0.19	0.21	0.28	0.27	0.26	0.24	0.34	0.29	0.51	0.41
Q99LX0	Park7	Protein/nucleic acid deglycase DJ-1 OS=Mus musculus OX=10090 GN=Park7 PE=1 SV=1	-1.37e+18	0	167.216	74	12	936	1	12	1	2616.91	936	12	0	>sp|Q99LX0|PARK7_MOUSE Protein/nucleic acid deglycase DJ-1 OS=Mus musculus OX=10090 GN=Park7 PE=1 SV=1	0.43	0.42	0.25	0.23	0.26	0.21	0.3	0.3	0.46	0.5	0.38	0.15	0.24	0.2	0.06	0.11	0.25	0.32	0.23	-0.31	-0.02	-0.1	-0.04	0.03	0.24	0.16	0.33	0.37	0.12	0.09	0.32	0.28	0.31
Q61001	Lama5	Laminin subunit alpha-5 OS=Mus musculus OX=10090 GN=Lama5 PE=1 SV=4	-7.58e+18	0	167.01	12	28	153	28	28	1	522.37	153	28	0	>sp|Q61001|LAMA5_MOUSE Laminin subunit alpha-5 OS=Mus musculus OX=10090 GN=Lama5 PE=1 SV=4	-0.19	-0.17	0.01	0.04	-0.01	-0.44	-0.02	-0.12	0.17	0.09	0.16	0.3	-0.02	0.22	0.16	0.12	0.12	0.2	0.19	0.16	0.09	-0.05	0.07	0.1	0.14	0.03	-0.01	0.13	-0.03	0.09	-0.09	0.04	0.1
Q3UKW2	Calm1	Isoform of P0DP26, Calmodulin-1 OS=Mus musculus OX=10090 GN=Calm1 PE=1 SV=1	4.83e+18	0	166.854	62	12	658	0	12	1	2411.59	658	12	0	>tr|Q3UKW2|Q3UKW2_MOUSE Isoform of P0DP26, Calmodulin-1 OS=Mus musculus OX=10090 GN=Calm1 PE=1 SV=1	0.47	1.2	0.62	0.3	0.17	0.44	0.02	0.04	0.41	0.11	0.19	0.08	0.17	0.15	0.31	0.5	0.01	0.45	0.38	-0.18	-0.48	-0.16	-0.15	0.43	-0.03	0.49	-0.43	0.13	0.01	-0.14	0.11	0.26	-0.06
Q8R146	Apeh	Acylamino-acid-releasing enzyme OS=Mus musculus OX=10090 GN=Apeh PE=1 SV=3	-5.71e+18	0	166.484	45	23	371	0	23	1	1445.39	371	23	0	>sp|Q8R146|APEH_MOUSE Acylamino-acid-releasing enzyme OS=Mus musculus OX=10090 GN=Apeh PE=1 SV=3	0.01	-0.07	0.15	0.15	0.06	-0.02	0	0.11	-0.08	0.03	0.11	-0.11	-0.09	-0.23	-0.27	-0.06	0.06	0.15	0	-0.28	-0.04	-0.06	-0.08	-0.28	-0.17	0.23	-0.28	0.09	-0.12	-0.21	0.05	0.01	0.01
Q8C7X2	Emc1	ER membrane protein complex subunit 1 OS=Mus musculus OX=10090 GN=Emc1 PE=1 SV=1	6.99e+18	0	165.64	37	25	268	1	25	1	992.32	268	25	0	>sp|Q8C7X2|EMC1_MOUSE ER membrane protein complex subunit 1 OS=Mus musculus OX=10090 GN=Emc1 PE=1 SV=1	0.06	0.07	-0.05	-0.08	0.04	0.1	-0.08	0.07	-0.09	-0.13	0.01	-0.15	-0.03	-0.1	-0.25	-0.1	-0.1	0.08	-0.04	-0.1	0.01	0.08	0.09	-0.13	-0.04	-0.09	0.03	0.02	-0.05	-0.08	-0.01	-0.02	-0.02
Q6PHQ9	Pabpc4	Polyadenylate-binding protein OS=Mus musculus OX=10090 GN=Pabpc4 PE=1 SV=1	6.56e+18	0	165.178	43	26	401	0	18	1	1290.42	401	26	9	>tr|Q6PHQ9|Q6PHQ9_MOUSE Polyadenylate-binding protein OS=Mus musculus OX=10090 GN=Pabpc4 PE=1 SV=1	-0.01	0.17	0.04	-0.07	-0.06	-0.01	-1.16	0	-1.32	-1.3	0.04	-0.21	-0.05	-0.14	-0.17	-0.13	0.06	-0.05	0.02	-0.01	0.06	-0.14	-0.13	0.02	0.01	0.03	0.03	-0.12	-0.01	-0.11	-0.06	-0.07	0.08
Q922U2	Krt5	Keratin, type II cytoskeletal 5 OS=Mus musculus OX=10090 GN=Krt5 PE=1 SV=1	7.64e+18	0	165.112	46	30	424	19	19	1	1321.37	424	30	12	>sp|Q922U2|K2C5_MOUSE Keratin, type II cytoskeletal 5 OS=Mus musculus OX=10090 GN=Krt5 PE=1 SV=1	-1.39	1.02	-0.1	-0.63	-0.16	2.47	-1.47	-0.79	-1.1	-1.35	-0.51	1.87	0.69	0.73	-0.64	-1.01	-0.37	-1.06	-1.94	1.9	-1.39	-1.28	-1.01	-0.78	-0.79	-0.56	-0.05	1.78	0.52	0.55	0.44	-0.55	-0.74
Q9CZ30	Ola1	Obg-like ATPase 1 OS=Mus musculus OX=10090 GN=Ola1 PE=1 SV=1	6.35e+18	0	164.87	63	24	453	9	24	1	1636.35	453	24	0	>sp|Q9CZ30|OLA1_MOUSE Obg-like ATPase 1 OS=Mus musculus OX=10090 GN=Ola1 PE=1 SV=1	0.16	0.14	0.02	0.04	-0.09	0.01	-0.08	0.12	-0.08	-0.11	-0.06	-0.11	-0.14	-0.16	-0.09	0	-0.11	0.11	0.09	-0.31	-0.25	-0.22	-0.29	-0.18	-0.21	0.19	-0.44	-0.11	-0.1	-0.03	0.02	0.04	-0.09
Q3UER8	Fgg	Isoform of Q8VCM7, Fibrinogen gamma chain OS=Mus musculus OX=10090 GN=Fgg PE=1 SV=1	7.31e+18	0	164.753	61	19	364	0	19	1	1386.47	364	19	0	>tr|Q3UER8|Q3UER8_MOUSE Isoform of Q8VCM7, Fibrinogen gamma chain OS=Mus musculus OX=10090 GN=Fgg PE=1 SV=1	-0.2	0.03	-0.07	-0.2	-0.29	-0.28	-0.39	-0.34	-0.29	-0.44	-0.27	-0.06	-0.54	-0.21	-0.17	-0.08	-0.08	0.22	-0.28	0.51	-0.19	-0.08	-0.08	-0.08	-0.27	-0.28	0.03	-0.27	-0.26	0.25	-0.32	-0.03	-0.35
A2A7S7	Yars	Isoform of Q91WQ3, Tyrosine--tRNA ligase OS=Mus musculus OX=10090 GN=Yars PE=1 SV=1	-2.51e+18	0	164.392	55	29	419	0	29	1	1251.81	419	29	0	>tr|A2A7S7|A2A7S7_MOUSE Isoform of Q91WQ3, Tyrosine--tRNA ligase OS=Mus musculus OX=10090 GN=Yars PE=1 SV=1	0.02	0.05	0.14	0.08	0.08	0.11	0	0.09	-0.05	-0.05	0.16	0.04	0.02	-0.09	-0.03	0.2	0	0.1	0.02	-0.11	0.03	0	-0.11	0.19	0.14	0.14	-0.43	-0.05	0.03	-0.03	0.08	0.04	0.01
P62259	Ywhae	14-3-3 protein epsilon OS=Mus musculus OX=10090 GN=Ywhae PE=1 SV=1	8.29e+18	0	164.319	74	20	1006	6	17	1	3215.49	1006	20	4	>sp|P62259|1433E_MOUSE 14-3-3 protein epsilon OS=Mus musculus OX=10090 GN=Ywhae PE=1 SV=1	0.26	0.26	0.09	0.1	0.1	0.14	0.15	0.05	0	0.08	0.16	0.12	-0.02	-0.1	-0.01	0.1	0.05	0.2	0.18	-0.1	-0.06	-0.04	-0.13	0.18	0.09	0.21	-0.24	0.07	0.05	-0.06	0.08	0.02	-0.02
P82198	Tgfbi	Transforming growth factor-beta-induced protein ig-h3 OS=Mus musculus OX=10090 GN=Tgfbi PE=1 SV=1	-3.32e+18	0	164.039	47	22	336	2	22	1	1023.86	336	22	0	>sp|P82198|BGH3_MOUSE Transforming growth factor-beta-induced protein ig-h3 OS=Mus musculus OX=10090 GN=Tgfbi PE=1 SV=1	0.23	0.73	-0.08	-0.4	-0.19	-0.1	-0.58	-0.5	-0.76	-0.49	-0.18	0.45	-0.4	-0.34	0.03	-0.24	-0.36	-0.27	-0.21	-0.24	-0.16	-0.28	-0.24	-0.35	0.12	-0.21	-0.04	-0.21	0.08	-0.12	-0.3	-0.24	-0.18
Q924M7	Mpi	Mannose-6-phosphate isomerase OS=Mus musculus OX=10090 GN=Mpi PE=1 SV=1	-4.13e+18	0	163.997	49	14	398	10	14	1	1641.13	398	14	0	>sp|Q924M7|MPI_MOUSE Mannose-6-phosphate isomerase OS=Mus musculus OX=10090 GN=Mpi PE=1 SV=1	-0.01	-0.09	-0.08	-0.27	0.19	-0.12	0.09	0.19	0.01	0.04	0	-0.26	-0.2	-0.27	-0.2	-0.35	-0.01	0.13	0.21	-0.39	-0.02	-0.22	-0.05	-0.45	-0.14	-0.28	-0.45	0.08	-0.17	-0.23	-0.07	-0.17	-0.1
F6RPJ9	Ide	Isoform of Q9JHR7, Insulin-degrading enzyme (Fragment) OS=Mus musculus OX=10090 GN=Ide PE=1 SV=1	1.09e+18	0	163.835	35	29	306	1	29	1	944.07	306	29	0	>tr|F6RPJ9|F6RPJ9_MOUSE Isoform of Q9JHR7, Insulin-degrading enzyme (Fragment) OS=Mus musculus OX=10090 GN=Ide PE=1 SV=1	0.02	0	-0.03	-0.07	-0.07	-0.11	-0.1	-0.2	-0.25	-0.14	-0.17	-0.13	-0.07	-0.28	-0.24	-0.18	-0.15	-0.04	0.12	-0.17	-0.1	-0.2	-0.26	-0.05	-0.11	0.12	-0.09	-0.03	-0.11	-0.2	-0.16	-0.14	-0.03
Q9WU78	Pdcd6ip	Programmed cell death 6-interacting protein OS=Mus musculus OX=10090 GN=Pdcd6ip PE=1 SV=3	8.59e+17	0	163.705	41	36	417	1	36	1	1400.03	417	36	0	>sp|Q9WU78|PDC6I_MOUSE Programmed cell death 6-interacting protein OS=Mus musculus OX=10090 GN=Pdcd6ip PE=1 SV=3	0.1	0.02	-0.04	-0.01	-0.09	0	-0.03	0.02	-0.03	0.01	-0.03	0.06	-0.05	-0.1	-0.08	0	-0.07	0.03	0.03	-0.01	-0.02	0.07	-0.06	0.07	-0.05	0.01	-0.23	-0.02	-0.09	0.03	-0.04	0	-0.04
A0A0R4IZY0	Thop1	Isoform of Q8C1A5, Thimet oligopeptidase OS=Mus musculus OX=10090 GN=Thop1 PE=1 SV=1	-2.15e+18	0	163.609	45	28	281	1	27	1	886.56	281	28	1	>tr|A0A0R4IZY0|A0A0R4IZY0_MOUSE Isoform of Q8C1A5, Thimet oligopeptidase OS=Mus musculus OX=10090 GN=Thop1 PE=1 SV=1	0.13	0.17	0.09	0.09	0.14	0.09	0.02	0.08	0	0.37	0.08	0.01	0.13	0.04	0.12	0.08	0.15	0.02	-0.04	0.04	0.12	-0.17	-0.26	0.18	0.15	0.02	-0.12	0.21	0.03	0.02	0.03	0.08	-0.08
A2A5Y6	Mapt	Isoform of P10637, Microtubule-associated protein OS=Mus musculus OX=10090 GN=Mapt PE=1 SV=1	7.7e+18	0	163.107	49	24	226	2	2	1	755.65	226	24	25	>tr|A2A5Y6|A2A5Y6_MOUSE Isoform of P10637, Microtubule-associated protein OS=Mus musculus OX=10090 GN=Mapt PE=1 SV=1	0.11	-0.05	0.1	0.03	-0.06	-0.23	0.26	-0.07	0.11	0.07	0.21	-0.08	-0.11	-0.03	-0.08	-0.07	-0.12	-0.08	-0.07	-0.37	-0.27	-0.13	-0.04	-0.09	0.07	0.11	-0.26	-0.1	0.02	-0.09	0.13	0	0.07
P24270	Cat	Catalase OS=Mus musculus OX=10090 GN=Cat PE=1 SV=4	-1.73e+17	0	162.947	65	25	337	16	25	1	1311.66	337	25	0	>sp|P24270|CATA_MOUSE Catalase OS=Mus musculus OX=10090 GN=Cat PE=1 SV=4	-0.62	-0.18	-0.15	0.25	-0.2	0.26	0.35	0.24	0.73	0.48	-0.33	-0.1	0.26	0.6	0.7	0.36	-0.09	-0.08	-0.15	0.73	-0.01	0.63	0.4	0.53	-0.04	-0.08	0.2	-0.1	0.18	0.6	-0.03	0.47	-0.11
Q9WV35	Apobec2	C->U-editing enzyme APOBEC-2 OS=Mus musculus OX=10090 GN=Apobec2 PE=1 SV=1	4.35e+18	0	162.927	78	10	510	10	10	1	1909.27	510	10	0	>sp|Q9WV35|ABEC2_MOUSE C->U-editing enzyme APOBEC-2 OS=Mus musculus OX=10090 GN=Apobec2 PE=1 SV=1	0.24	0.3	0.09	0.19	0.13	-0.11	-0.2	0.16	-0.35	-0.15	-0.08	-0.26	-0.2	-0.21	-0.09	-0.04	0.05	0.14	0.27	-0.24	-0.06	-0.1	-0.26	0.14	0.04	0.29	0.13	0.09	-0.21	-0.11	-0.14	-0.13	-0.03
E9Q456	Tpm1	Isoform of P58771, Tropomyosin alpha-1 chain OS=Mus musculus OX=10090 GN=Tpm1 PE=1 SV=1	-9.09e+18	0	162.851	58	22	7403	0	3	1	18752.5	7403	22	0	>tr|E9Q456|E9Q456_MOUSE Isoform of P58771, Tropomyosin alpha-1 chain OS=Mus musculus OX=10090 GN=Tpm1 PE=1 SV=1	0.11	0.07	-0.07	-0.2	-0.09	-0.13	-0.01	0.04	-0.02	0.08	0.02	-0.06	-0.04	0.21	-0.15	-0.08	0.19	0.11	0.03	-0.31	-0.33	0.15	0.4	-0.2	0.02	-0.33	-0.01	-0.04	0.08	-0.23	0.19	0.05	0.06
Q8CHT0	Aldh4a1	Delta-1-pyrroline-5-carboxylate dehydrogenase, mitochondrial OS=Mus musculus OX=10090 GN=Aldh4a1 PE=1 SV=3	-8.37e+18	0	162.589	63	25	353	24	25	1	1235.37	353	25	0	>sp|Q8CHT0|AL4A1_MOUSE Delta-1-pyrroline-5-carboxylate dehydrogenase, mitochondrial OS=Mus musculus OX=10090 GN=Aldh4a1 PE=1 SV=3	0.34	0.64	0.57	0.61	0.83	0.56	0.78	0.73	0.88	0.74	0.56	0.42	0.73	0.71	0.7	0.77	0.63	-0.45	-0.56	0.65	0.63	-0.55	-0.47	0.53	0.65	0.63	0.82	0.72	0.74	0.68	0.83	0.89	0.89
Q8CGN5	Plin1	Perilipin-1 OS=Mus musculus OX=10090 GN=Plin1 PE=1 SV=2	3.56e+18	0	162.554	60	24	287	6	20	1	1023.66	287	24	5	>sp|Q8CGN5|PLIN1_MOUSE Perilipin-1 OS=Mus musculus OX=10090 GN=Plin1 PE=1 SV=2	-0.61	0.76	-0.07	0.95	-0.23	1.41	-0.24	-0.31	1.74	-0.1	-0.29	0.77	1.95	2.26	2.53	2.11	0.2	-0.51	-1.07	2.09	0.64	1.21	0.48	1.93	-0.25	-0.5	0.92	-0.67	0.19	1.55	0.24	1.62	-0.38
P17563	Selenbp1	Methanethiol oxidase OS=Mus musculus OX=10090 GN=Selenbp1 PE=1 SV=2	8.17e+18	0	162.418	61	21	336	4	21	1	1270.22	336	21	0	>sp|P17563|SBP1_MOUSE Methanethiol oxidase OS=Mus musculus OX=10090 GN=Selenbp1 PE=1 SV=2	-0.34	-0.06	0.22	0.49	0.24	-0.07	-0.21	0.99	0.09	-0.07	0.26	0.24	0.13	0.43	0.71	0.25	0.27	-0.26	-0.28	0.51	0.52	0.14	-0.04	0.24	0.17	0.06	0.44	0.72	0.36	0.58	0.31	0.65	0.14
Q8BVQ9	Psmc2	Isoform of P46471, 26S proteasome regulatory subunit 7 OS=Mus musculus OX=10090 GN=Psmc2 PE=1 SV=1	-1.77e+17	0	162.266	51	21	417	0	21	1	1492.05	417	21	0	>tr|Q8BVQ9|Q8BVQ9_MOUSE Isoform of P46471, 26S proteasome regulatory subunit 7 OS=Mus musculus OX=10090 GN=Psmc2 PE=1 SV=1	0.04	0.02	0.06	0.1	-0.07	0	0.02	0.04	-0.03	0.13	0.01	-0.03	0.04	0	0.03	0.06	-0.09	0.13	0.08	-0.06	0.01	-0.06	-0.12	0.06	-0.08	0.18	-0.03	-0.02	-0.11	-0.1	-0.03	-0.03	0.03
Q9ET80	Jph1	Junctophilin-1 OS=Mus musculus OX=10090 GN=Jph1 PE=1 SV=1	-5.82e+18	0	162.212	42	25	435	20	24	1	1388.84	435	25	0	>sp|Q9ET80|JPH1_MOUSE Junctophilin-1 OS=Mus musculus OX=10090 GN=Jph1 PE=1 SV=1	0.19	0.25	0.17	0.05	0.03	0.02	0.02	0.07	-0.16	0.06	0.28	0.05	0.04	0	0.04	0.02	0.12	0.25	0.15	-0.13	0.11	-0.15	-0.08	0.2	0.27	-0.08	-0.19	-0.02	-0.09	-0.19	0.01	0.07	-0.13
Q8BRK9	Man2a2	Alpha-mannosidase 2x OS=Mus musculus OX=10090 GN=Man2a2 PE=1 SV=2	4.12e+18	0	161.53	34	24	270	6	23	1	1106.23	270	24	1	>sp|Q8BRK9|MA2A2_MOUSE Alpha-mannosidase 2x OS=Mus musculus OX=10090 GN=Man2a2 PE=1 SV=2	0.11	-0.04	0.11	-0.06	-0.08	-0.27	0.15	-0.3	0.05	0.24	-0.38	-0.32	-0.18	-0.38	-0.51	-0.27	-0.08	0.58	0.6	-0.35	-0.17	-0.16	-0.19	-0.44	-0.39	0.02	0.24	-0.13	-0.12	-0.26	0.06	-0.13	0.18
P01942	Hba	Hemoglobin subunit alpha OS=Mus musculus OX=10090 GN=Hba PE=1 SV=2	8.2e+16	0	161.348	90	12	1336	2	2	1	3617.57	1336	12	11	>sp|P01942|HBA_MOUSE Hemoglobin subunit alpha OS=Mus musculus OX=10090 GN=Hba PE=1 SV=2	-0.83	-0.6	-0.17	-0.23	-0.72	-0.22	-0.07	0.11	-0.24	-0.3	-0.11	-0.64	-0.17	0.36	0.19	-0.24	-0.22	1.04	0.16	0.89	-0.14	-0.2	-0.04	-0.32	-0.64	-0.89	-0.58	0.06	-0.39	-0.03	-0.58	0.06	-0.57
Q9CY58-2	Serbp1	Isoform of Q9CY58, Isoform 2 of Plasminogen activator inhibitor 1 RNA-binding protein OS=Mus musculus OX=10090 GN=Serbp1	8.19e+18	0	161.229	50	17	314	0	1	1	1119.51	314	17	0	>sp|Q9CY58-2|PAIRB_MOUSE Isoform of Q9CY58, Isoform 2 of Plasminogen activator inhibitor 1 RNA-binding protein OS=Mus musculus OX=10090 GN=Serbp1	0.18	0.1	0.13	NaN	0.05	0.35	-0.02	-0.09	-0.16	-0.28	0.1	NaN	0.7	-0.04	NaN	0.58	NaN	NaN	0.23	-0.13	-0.21	-0.47	-0.7	0.54	-0.1	NaN	-0.29	-0.21	-0.12	-0.08	-0.18	-0.13	0.13
G3UWS1	Neb	Isoform of E9Q1W3, Nebulin (Fragment) OS=Mus musculus OX=10090 GN=Neb PE=1 SV=1	-5.28e+18	0	160.923	62	22	877	2	2	1	2648.43	877	22	0	>tr|G3UWS1|G3UWS1_MOUSE Isoform of E9Q1W3, Nebulin (Fragment) OS=Mus musculus OX=10090 GN=Neb PE=1 SV=1	0.1	-0.02	0.31	0.15	-0.06	-0.01	-0.01	0.32	0.05	0.34	0.11	-0.07	-0.29	-0.32	-0.6	0.61	0.76	0.36	0.31	-0.66	-0.17	0.37	0.31	-0.61	-0.26	0.08	0.29	0.04	0.38	-0.26	0.33	0.24	0.52
Q61781	Krt14	Keratin, type I cytoskeletal 14 OS=Mus musculus OX=10090 GN=Krt14 PE=1 SV=2	7.32e+18	0	160.487	55	23	354	10	11	1	1261.23	354	23	10	>sp|Q61781|K1C14_MOUSE Keratin, type I cytoskeletal 14 OS=Mus musculus OX=10090 GN=Krt14 PE=1 SV=2	-2.35	0.56	-0.4	-0.58	-0.26	1.98	-0.93	-0.91	-1.3	-1.15	-0.46	1.67	0.62	0.56	-0.37	-0.77	-0.22	-1.22	-2.19	2.64	-1.22	-1.52	-1.21	-0.4	-0.3	-1.42	-0.2	2.04	1.01	0.66	0.72	-0.56	-1.09
P35564	Canx	Calnexin OS=Mus musculus OX=10090 GN=Canx PE=1 SV=1	4.51e+18	0	160.228	49	26	362	26	26	1	1233.57	362	26	0	>sp|P35564|CALX_MOUSE Calnexin OS=Mus musculus OX=10090 GN=Canx PE=1 SV=1	0.08	0.17	0.01	0.09	-0.1	0.14	0.01	0.01	-0.09	-0.18	-0.06	0.07	0	-0.06	0.06	0.16	-0.07	0.1	0.22	0.06	-0.05	-0.08	0.19	0.43	-0.05	0.14	-0.06	-0.18	-0.05	0.1	0	0.01	-0.04
P17427	Ap2a2	AP-2 complex subunit alpha-2 OS=Mus musculus OX=10090 GN=Ap2a2 PE=1 SV=2	4.59e+18	0	160.023	38	27	250	18	18	1	864.72	250	27	0	>sp|P17427|AP2A2_MOUSE AP-2 complex subunit alpha-2 OS=Mus musculus OX=10090 GN=Ap2a2 PE=1 SV=2	-0.12	-0.07	-0.13	-0.11	-0.1	-0.09	-0.1	-0.12	-0.06	-0.07	-0.29	0.09	-0.08	0.17	-0.23	-0.08	-0.09	-0.02	-0.15	0.02	-0.1	-0.2	-0.02	-0.29	-0.18	-0.12	0.69	-0.19	0	0.03	0.03	-0.12	-0.07
Q9DBG3-2	Ap2b1	Isoform of Q9DBG3, Isoform 2 of AP-2 complex subunit beta OS=Mus musculus OX=10090 GN=Ap2b1	-7.95e+18	0	159.793	39	27	296	0	17	1	1036.2	296	27	10	>sp|Q9DBG3-2|AP2B1_MOUSE Isoform of Q9DBG3, Isoform 2 of AP-2 complex subunit beta OS=Mus musculus OX=10090 GN=Ap2b1	0.17	0.04	-0.16	-0.1	-0.16	0.01	-0.11	-0.13	-0.05	-0.07	-0.13	0.03	-0.03	-0.02	-0.2	0.06	-0.05	0.03	-0.04	-0.09	-0.05	-0.06	-0.18	0.01	0.12	0.05	0.07	-0.12	-0.11	0.11	-0.03	0.04	-0.05
P42232	Stat5b	Signal transducer and activator of transcription 5B OS=Mus musculus OX=10090 GN=Stat5b PE=1 SV=1	8.03e+18	0	159.689	45	26	327	6	6	1	1166.78	327	26	20	>sp|P42232|STA5B_MOUSE Signal transducer and activator of transcription 5B OS=Mus musculus OX=10090 GN=Stat5b PE=1 SV=1	0.24	0.25	0.12	0.02	0.16	0.16	0.11	-0.03	-0.14	0	0.23	0.08	-0.04	-0.1	-0.14	0.07	0.14	0.14	0.1	-0.18	0.13	-0.06	-0.07	0.07	0.1	-0.05	-0.54	0.15	0.03	-0.08	0.05	-0.01	-0.05
A2AJQ0	Pdp1	Isoform of Q3UV70, [Pyruvate dehydrogenase [acetyl-transferring]]-phosphatase 1, mitochondrial OS=Mus musculus OX=10090 GN=Pdp1 PE=1 SV=2	-7.86e+17	0	159.557	44	17	243	0	17	1	988.08	243	17	0	>tr|A2AJQ0|A2AJQ0_MOUSE Isoform of Q3UV70, [Pyruvate dehydrogenase [acetyl-transferring]]-phosphatase 1, mitochondrial OS=Mus musculus OX=10090 GN=Pdp1 PE=1 SV=2	0.07	0.13	0.04	0	0.2	0	0.28	0.15	0.43	0.41	-0.01	-0.12	0.05	-0.1	-0.1	0.05	0.24	-0.32	-0.33	-0.04	0.11	0.09	0.13	0	0.2	0	0.18	0.22	0.21	0.02	0.18	0.13	0.16
P62192	Psmc1	26S proteasome regulatory subunit 4 OS=Mus musculus OX=10090 GN=Psmc1 PE=1 SV=1	7.9e+18	0	159.089	67	22	424	20	20	1	1478.69	424	22	0	>sp|P62192|PRS4_MOUSE 26S proteasome regulatory subunit 4 OS=Mus musculus OX=10090 GN=Psmc1 PE=1 SV=1	0	0.04	0.04	0.07	-0.03	0.03	0	0.02	-0.04	0.11	-0.01	-0.08	0.07	0.1	0	-0.05	-0.03	0.13	0.06	-0.08	0.02	-0.12	-0.04	0.06	-0.07	0.04	-0.13	-0.02	-0.1	-0.13	-0.03	-0.05	0.07
O35887	Calu	Calumenin OS=Mus musculus OX=10090 GN=Calu PE=1 SV=1	3.7e+18	0	158.829	64	16	280	0	3	1	1096.15	280	16	15	>sp|O35887|CALU_MOUSE Calumenin OS=Mus musculus OX=10090 GN=Calu PE=1 SV=1	0.07	0.14	0.08	-0.03	-0.18	0	-0.12	-0.05	-0.06	-0.2	-0.02	-0.03	-0.06	-0.18	0.06	0.21	-0.03	-0.07	-0.1	0.01	-0.02	-0.1	-0.05	0.06	0.03	0.09	-0.06	-0.11	-0.19	-0.05	-0.19	-0.05	-0.06
Q9CYT6	Cap2	Adenylyl cyclase-associated protein 2 OS=Mus musculus OX=10090 GN=Cap2 PE=1 SV=1	5.89e+18	0	158.694	52	21	327	0	20	1	1227.77	327	21	1	>sp|Q9CYT6|CAP2_MOUSE Adenylyl cyclase-associated protein 2 OS=Mus musculus OX=10090 GN=Cap2 PE=1 SV=1	0.24	0.29	0.04	0.03	-0.14	0.12	-0.01	0.09	-0.03	-0.05	0.06	-0.04	-0.02	-0.22	-0.16	0.21	-0.02	0.19	0.08	-0.14	-0.07	-0.35	-0.28	0.21	0.03	0.14	0.13	-0.04	-0.12	-0.12	-0.15	-0.24	0.11
Q8BML9	Qars	Glutamine--tRNA ligase OS=Mus musculus OX=10090 GN=Qars PE=1 SV=1	8.87e+18	0	158.392	39	26	309	0	26	1	993.09	309	26	0	>sp|Q8BML9|SYQ_MOUSE Glutamine--tRNA ligase OS=Mus musculus OX=10090 GN=Qars PE=1 SV=1	-0.03	0.06	0.13	0.05	-0.02	-0.01	-0.11	0.01	-0.2	-0.11	0	-0.04	-0.04	-0.13	-0.13	-0.01	-0.08	0.16	0.13	-0.16	-0.08	-0.05	-0.08	-0.12	-0.12	-0.01	-0.02	-0.12	-0.01	0	0.18	0	0
P53395	Dbt	Lipoamide acyltransferase component of branched-chain alpha-keto acid dehydrogenase complex, mitochondrial OS=Mus musculus OX=10090 GN=Dbt PE=1 SV=2	1.98e+18	0	158.375	56	21	324	20	21	1	1122.55	324	21	0	>sp|P53395|ODB2_MOUSE Lipoamide acyltransferase component of branched-chain alpha-keto acid dehydrogenase complex, mitochondrial OS=Mus musculus OX=10090 GN=Dbt PE=1 SV=2	-0.44	-0.34	0.2	0.21	0.04	0.15	0.19	0.32	0.6	0.34	-0.05	-0.19	0.13	0.05	0.36	0.25	-0.01	-0.02	0.23	0.16	0.17	0.09	-0.03	0.33	0.08	0.32	0.07	0.25	0.07	0.17	0.04	0.24	0.18
Q99LF4	Rtcb	tRNA-splicing ligase RtcB homolog OS=Mus musculus OX=10090 GN=Rtcb PE=1 SV=1	-8.64e+18	0	158.274	52	21	297	21	21	1	1012.52	297	21	0	>sp|Q99LF4|RTCB_MOUSE tRNA-splicing ligase RtcB homolog OS=Mus musculus OX=10090 GN=Rtcb PE=1 SV=1	-0.17	-0.09	0	-0.04	-0.06	-0.07	-0.22	0	-0.21	-0.17	0	-0.08	-0.07	-0.01	-0.13	0.06	-0.04	-0.13	-0.21	-0.17	-0.11	0.27	0.11	-0.11	-0.04	0.04	0.19	-0.05	-0.06	0.04	-0.04	0.06	-0.04
Q9JMH6	Txnrd1	Thioredoxin reductase 1, cytoplasmic OS=Mus musculus OX=10090 GN=Txnrd1 PE=1 SV=3	6.93e+18	0	157.653	43	19	365	0	18	1	1366.02	365	19	1	>sp|Q9JMH6|TRXR1_MOUSE Thioredoxin reductase 1, cytoplasmic OS=Mus musculus OX=10090 GN=Txnrd1 PE=1 SV=3	0.04	0	0.23	0.2	-0.09	-0.18	0.32	-0.07	0.53	0.59	0.35	0.1	-0.15	-0.31	-0.27	-0.16	-0.2	0.07	0.11	-0.25	-0.01	-0.06	-0.14	0.08	0.11	0.16	-0.3	-0.13	-0.17	-0.23	-0.1	-0.2	0.15
Q8CIB5	Fermt2	Fermitin family homolog 2 OS=Mus musculus OX=10090 GN=Fermt2 PE=1 SV=1	4.61e+18	0	157.507	47	23	307	12	18	1	1011.78	307	23	5	>sp|Q8CIB5|FERM2_MOUSE Fermitin family homolog 2 OS=Mus musculus OX=10090 GN=Fermt2 PE=1 SV=1	-0.09	0	-0.07	-0.04	-0.02	-0.04	0.01	-0.09	-0.03	-0.07	0.02	-0.04	-0.13	-0.22	-0.14	0.03	-0.03	-0.08	0	-0.07	0.11	-0.08	-0.01	-0.15	0.04	0.06	-0.4	-0.02	0.02	-0.11	0.01	-0.05	0.04
P06728	Apoa4	Apolipoprotein A-IV OS=Mus musculus OX=10090 GN=Apoa4 PE=1 SV=3	5.75e+18	0	157.339	59	22	450	22	22	1	1681.01	450	22	0	>sp|P06728|APOA4_MOUSE Apolipoprotein A-IV OS=Mus musculus OX=10090 GN=Apoa4 PE=1 SV=3	-0.09	-0.01	0.03	0.14	-0.19	-0.25	0.19	-0.37	0.22	0.19	-0.08	0.44	-0.17	-0.03	0.1	0.15	0.01	-0.14	-0.3	0.4	0.2	0.16	0.28	0.4	0.55	-0.23	-0.02	-0.25	-0.04	0.29	-0.31	0.04	-0.26
Q9WV06	Ankrd2	Ankyrin repeat domain-containing protein 2 OS=Mus musculus OX=10090 GN=Ankrd2 PE=1 SV=3	6.06e+18	0	157.26	63	18	330	18	18	1	1167.43	330	18	0	>sp|Q9WV06|ANKR2_MOUSE Ankyrin repeat domain-containing protein 2 OS=Mus musculus OX=10090 GN=Ankrd2 PE=1 SV=3	-0.68	-0.54	-0.13	0.22	0.12	-0.55	0.74	-0.46	0.2	0.02	0.2	-0.41	-0.07	0.09	0.58	-0.27	-0.14	-1.16	-1.59	0.41	0.38	-0.27	0.43	0.08	0.84	0.32	0.96	0.15	-0.08	0.01	-0.28	-0.13	0.65
P19157	Gstp1	Glutathione S-transferase P 1 OS=Mus musculus OX=10090 GN=Gstp1 PE=1 SV=2	-2.5e+18	0	156.417	58	9	428	3	9	1	1498.43	428	9	0	>sp|P19157|GSTP1_MOUSE Glutathione S-transferase P 1 OS=Mus musculus OX=10090 GN=Gstp1 PE=1 SV=2	0.02	0.09	-0.09	-0.07	0.1	0.02	0	0.01	0.05	0.13	0.19	0.07	-0.08	-0.16	-0.24	-0.16	-0.11	0.04	0.07	-0.13	-0.01	0.15	0.1	-0.05	-0.16	-0.12	-0.21	0.03	0.01	-0.15	0.06	-0.01	0.03
P10649	Gstm1	Glutathione S-transferase Mu 1 OS=Mus musculus OX=10090 GN=Gstm1 PE=1 SV=2	-6e+18	0	156.006	70	18	666	1	6	1	2274.97	666	18	9	>sp|P10649|GSTM1_MOUSE Glutathione S-transferase Mu 1 OS=Mus musculus OX=10090 GN=Gstm1 PE=1 SV=2	0.23	0.24	0.15	0.15	0.18	0.2	0.33	0.34	0.57	0.63	0.37	0.28	0.25	0.43	0.25	0.18	0.12	0.26	0.16	-0.01	0.1	0.05	0.07	0.4	0.26	-0.02	0	0.22	0.13	0.05	0.3	0.22	0.18
Q80YX1	Tnc	Tenascin OS=Mus musculus OX=10090 GN=Tnc PE=1 SV=1	-3.42e+18	0	155.983	18	26	229	0	26	1	868.78	229	26	0	>sp|Q80YX1|TENA_MOUSE Tenascin OS=Mus musculus OX=10090 GN=Tnc PE=1 SV=1	0.16	0.76	0.03	-0.55	-0.48	-0.2	-0.43	-0.49	-0.95	-0.52	-0.39	0.12	-0.93	-0.37	-0.58	-0.43	-0.49	-0.89	-0.52	-0.32	-0.19	-0.33	0.05	-0.88	0.02	-0.2	0.34	-0.42	0.33	-0.3	-0.11	-0.16	-0.08
P54775	Psmc4	26S proteasome regulatory subunit 6B OS=Mus musculus OX=10090 GN=Psmc4 PE=1 SV=2	8.85e+18	0	155.647	63	24	318	4	23	1	1039.07	318	24	1	>sp|P54775|PRS6B_MOUSE 26S proteasome regulatory subunit 6B OS=Mus musculus OX=10090 GN=Psmc4 PE=1 SV=2	-0.04	-0.14	0.07	0.02	0	-0.09	0.04	0.02	-0.07	-0.05	0.08	0.01	0.11	0.06	-0.08	-0.12	-0.02	0.1	0.12	-0.02	0.04	-0.11	0.02	0.08	-0.06	0.18	0.01	-0.02	-0.02	-0.11	-0.01	-0.01	0.1
Q8BGH2	Samm50	Sorting and assembly machinery component 50 homolog OS=Mus musculus OX=10090 GN=Samm50 PE=1 SV=1	-6.49e+17	0	155.455	50	18	375	18	18	1	1343.32	375	18	0	>sp|Q8BGH2|SAM50_MOUSE Sorting and assembly machinery component 50 homolog OS=Mus musculus OX=10090 GN=Samm50 PE=1 SV=1	-0.04	0.1	-0.05	-0.1	0.1	-0.08	-0.01	0.14	0.06	-0.05	-0.01	-0.13	0.05	-0.04	0.09	0.04	0.06	-0.11	0.15	-0.04	0.15	0.03	-0.02	-0.03	0.1	0.07	0.06	0.17	0.12	0.05	0.01	0.1	0.07
P61982	Ywhag	14-3-3 protein gamma OS=Mus musculus OX=10090 GN=Ywhag PE=1 SV=2	6.24e+17	0	155.133	75	18	681	12	12	1	2148.87	681	18	6	>sp|P61982|1433G_MOUSE 14-3-3 protein gamma OS=Mus musculus OX=10090 GN=Ywhag PE=1 SV=2	0.2	0.24	0.16	0.14	0.08	0.33	0.16	0.03	0.15	0.05	0.09	0.07	0.08	0.08	0.23	0.28	-0.05	0.07	0.13	0.07	-0.05	0.02	-0.09	0.3	0.09	0.22	-0.26	0.02	0	0.07	0.05	0.16	-0.05
Q9JLV1	Bag3	BAG family molecular chaperone regulator 3 OS=Mus musculus OX=10090 GN=Bag3 PE=1 SV=2	-4.47e+18	0	154.916	57	24	288	24	24	1	1036.69	288	24	0	>sp|Q9JLV1|BAG3_MOUSE BAG family molecular chaperone regulator 3 OS=Mus musculus OX=10090 GN=Bag3 PE=1 SV=2	-0.13	-0.13	0.09	0.05	-0.01	-0.05	0.21	0.04	-0.02	-0.01	0.1	-0.19	-0.04	-0.09	0	-0.01	-0.02	-0.14	0.07	-0.11	-0.13	-0.1	0.09	-0.19	0.03	0.11	0.11	-0.04	-0.04	-0.15	-0.01	-0.08	0
Q9ET01	Pygl	Glycogen phosphorylase, liver form OS=Mus musculus OX=10090 GN=Pygl PE=1 SV=4	-8.37e+18	0	154.765	33	25	759	1	15	1	2361.04	759	25	0	>sp|Q9ET01|PYGL_MOUSE Glycogen phosphorylase, liver form OS=Mus musculus OX=10090 GN=Pygl PE=1 SV=4	0.04	0.21	-0.06	0.47	0.07	NaN	NaN	-0.03	0.26	-0.36	0.21	1.11	0.89	1.06	2.09	1.07	0.08	-0.27	NaN	NaN	0.32	0.14	0.13	NaN	0.14	-0.06	0.05	-0.28	NaN	1.14	NaN	0.87	-0.4
Q3TVK3	Dnpep	Isoform of Q9Z2W0, Aspartyl aminopeptidase OS=Mus musculus OX=10090 GN=Dnpep PE=1 SV=1	4.29e+18	0	154.294	52	16	269	0	16	1	1039.38	269	16	0	>tr|Q3TVK3|Q3TVK3_MOUSE Isoform of Q9Z2W0, Aspartyl aminopeptidase OS=Mus musculus OX=10090 GN=Dnpep PE=1 SV=1	0.08	0.25	0.1	0.12	0.11	0.01	0.11	0.09	-0.03	0.03	-0.06	0.08	0.03	-0.15	-0.17	0.01	0.09	0.06	0.03	-0.08	0.03	0.06	0.15	0.05	0.11	-0.09	0.11	0.14	0.13	-0.03	0.1	0.06	0.06
Q6XLQ8	Calu	Isoform of O35887, Calumenin OS=Mus musculus OX=10090 GN=Calu PE=1 SV=1	-4.15e+18	0	154.243	65	15	273	2	2	1	1068.88	273	15	0	>tr|Q6XLQ8|Q6XLQ8_MOUSE Isoform of O35887, Calumenin OS=Mus musculus OX=10090 GN=Calu PE=1 SV=1	0.43	0.2	0.31	0.27	0.09	0.19	0	0.09	0.2	0.02	0.32	0.19	0.06	-0.1	0.34	0.44	-0.2	0.27	0.21	0.08	0.11	0.21	0.13	0.61	0.37	0.7	-0.41	-0.04	-0.2	0	0.03	0.19	0.16
Q99N15	Hsd17b10	Isoform of O08756, 17beta-hydroxysteroid dehydrogenase type 10/short chain L-3-hydroxyacyl-CoA dehydrogenase OS=Mus musculus OX=10090 GN=Hsd17b10 PE=1 SV=1	6.94e+18	0	153.924	81	14	358	0	14	1	1492.89	358	14	0	>tr|Q99N15|Q99N15_MOUSE Isoform of O08756, 17beta-hydroxysteroid dehydrogenase type 10/short chain L-3-hydroxyacyl-CoA dehydrogenase OS=Mus musculus OX=10090 GN=Hsd17b10 PE=1 SV=1	-0.08	-0.12	0.07	0.15	0.03	-0.04	0.19	0.14	0.32	0.38	-0.03	-0.07	0.12	0.13	0.27	0.17	0.22	0.13	0.19	-0.1	0.03	0	-0.08	0.05	0.14	-0.31	-0.03	0.14	0.02	0.04	0.03	0.15	-0.07
Q61696	Hspa1a	Heat shock 70 kDa protein 1A OS=Mus musculus OX=10090 GN=Hspa1a PE=1 SV=2	-6.15e+18	0	153.722	48	22	515	1	10	1	1858.51	515	22	7	>sp|Q61696|HS71A_MOUSE Heat shock 70 kDa protein 1A OS=Mus musculus OX=10090 GN=Hspa1a PE=1 SV=2	-0.59	-0.27	0.05	0.41	-0.12	-0.11	0.17	0.08	-0.03	0.02	-0.01	0.13	-0.05	0.19	0.52	-0.36	-0.32	-0.59	-0.43	0.68	0.21	-0.18	0.35	0.01	0.11	0.18	1.02	0.31	0.19	0.45	0.01	0.05	0.1
Q9D0M3	Cyc1	Cytochrome c1, heme protein, mitochondrial OS=Mus musculus OX=10090 GN=Cyc1 PE=1 SV=1	-6.97e+18	0	153.524	45	9	652	0	9	1	2344.23	652	9	0	>sp|Q9D0M3|CY1_MOUSE Cytochrome c1, heme protein, mitochondrial OS=Mus musculus OX=10090 GN=Cyc1 PE=1 SV=1	-0.31	-0.31	-0.04	-0.02	0.11	-0.1	0.05	0.02	0.06	-0.09	0	-0.22	0	-0.01	0.24	0	0.05	-0.17	0.09	0.03	0.24	0.1	0.23	-0.24	0.11	-0.1	0.05	0.15	0.11	0	0.11	0.13	0.14
P97384	Anxa11	Annexin A11 OS=Mus musculus OX=10090 GN=Anxa11 PE=1 SV=2	-6.42e+18	0	153.403	38	18	421	5	17	1	1337.72	421	18	1	>sp|P97384|ANX11_MOUSE Annexin A11 OS=Mus musculus OX=10090 GN=Anxa11 PE=1 SV=2	0.15	0.1	0.08	0	0.29	0.13	0.14	-0.05	0.1	0.18	0.32	0.17	0.05	0.15	0.1	0.16	0.14	0.08	0.05	-0.01	0.14	-0.07	0	0.32	0.4	0.23	0.21	0.4	0.03	-0.02	0	0	0.21
P51881	Slc25a5	ADP/ATP translocase 2 OS=Mus musculus OX=10090 GN=Slc25a5 PE=1 SV=3	-1.02e+18	0	153.311	57	19	1463	8	8	1	4661.72	1463	19	0	>sp|P51881|ADT2_MOUSE ADP/ATP translocase 2 OS=Mus musculus OX=10090 GN=Slc25a5 PE=1 SV=3	-0.13	-0.1	-0.24	-0.22	0.12	-0.09	0.21	-0.27	0.13	-0.08	0.08	0.01	0.07	0.26	0.37	0.24	0.16	-0.31	-0.06	0.17	0.05	0.1	-0.15	0.24	0.31	-0.16	-0.1	0.07	0.03	0.31	-0.08	0.24	-0.06
Q9CY58	Serbp1	Plasminogen activator inhibitor 1 RNA-binding protein OS=Mus musculus OX=10090 GN=Serbp1 PE=1 SV=2	7.27e+18	0	153.162	49	17	299	0	1	1	1058.06	299	17	18	>sp|Q9CY58|PAIRB_MOUSE Plasminogen activator inhibitor 1 RNA-binding protein OS=Mus musculus OX=10090 GN=Serbp1 PE=1 SV=2	0.05	0.06	-0.04	0.01	-0.09	0.12	-0.06	-0.02	-0.01	-0.03	-0.09	-0.07	-0.08	-0.07	0	0	0.08	0.1	-0.06	-0.04	0.04	-0.02	-0.12	0.19	0.05	0.09	-0.28	-0.2	-0.19	-0.02	-0.09	-0.07	-0.1
Q9Z1Z0	Uso1	General vesicular transport factor p115 OS=Mus musculus OX=10090 GN=Uso1 PE=1 SV=2	6.17e+18	0	153.007	29	23	243	0	23	1	878.86	243	23	0	>sp|Q9Z1Z0|USO1_MOUSE General vesicular transport factor p115 OS=Mus musculus OX=10090 GN=Uso1 PE=1 SV=2	-0.08	-0.15	0.03	0.03	-0.07	-0.06	-0.01	0.05	-0.02	-0.06	-0.15	-0.09	-0.13	-0.23	-0.21	-0.05	0	0.01	-0.07	-0.11	-0.06	-0.18	-0.13	-0.18	-0.2	-0.01	-0.01	-0.14	-0.09	0.03	-0.02	-0.07	0.16
G3X9D8	Klhl31	Isoform of Q8BWA5, Kelch-like protein 31 OS=Mus musculus OX=10090 GN=Klhl31 PE=1 SV=1	-3.28e+18	0	152.784	42	20	277	1	20	1	979.51	277	20	0	>tr|G3X9D8|G3X9D8_MOUSE Isoform of Q8BWA5, Kelch-like protein 31 OS=Mus musculus OX=10090 GN=Klhl31 PE=1 SV=1	0.08	0.02	-0.08	-0.08	0.13	-0.02	-0.12	-0.03	-0.08	0.01	0.1	-0.24	-0.03	-0.24	-0.42	-0.03	0.37	0.13	0.02	-0.16	0.12	-0.11	0.01	-0.45	-0.06	-0.18	-0.3	-0.18	-0.04	-0.14	0.18	0	0.1
P07934	Phkg1	Phosphorylase b kinase gamma catalytic chain, skeletal muscle/heart isoform OS=Mus musculus OX=10090 GN=Phkg1 PE=1 SV=3	2.6e+18	0	152.689	64	20	542	8	20	1	1795.48	542	20	0	>sp|P07934|PHKG1_MOUSE Phosphorylase b kinase gamma catalytic chain, skeletal muscle/heart isoform OS=Mus musculus OX=10090 GN=Phkg1 PE=1 SV=3	0.21	0.15	0.03	-0.07	0.03	0.03	0.19	-0.14	0.04	0.24	0.29	-0.04	0.03	-0.22	-0.23	-0.04	0.13	0.18	0.21	-0.33	-0.02	-0.16	-0.27	-0.23	-0.01	0.11	-0.29	0.11	-0.05	-0.32	0.17	0.03	0.12
Q8VEK3	Hnrnpu	Heterogeneous nuclear ribonucleoprotein U OS=Mus musculus OX=10090 GN=Hnrnpu PE=1 SV=1	7.13e+18	0	152.452	31	19	299	0	19	1	1009.28	299	19	0	>sp|Q8VEK3|HNRPU_MOUSE Heterogeneous nuclear ribonucleoprotein U OS=Mus musculus OX=10090 GN=Hnrnpu PE=1 SV=1	-0.11	0.23	-0.09	-0.01	-0.01	0.13	0.04	-0.27	0.11	0.07	-0.01	0.31	0.11	0.35	0.28	0.14	0.24	-0.14	-0.08	0.24	-0.17	0.02	-0.04	0.57	0.1	0.07	0.27	-0.08	-0.03	0.38	-0.1	0.13	-0.06
Q00898	Serpina1e	Alpha-1-antitrypsin 1-5 OS=Mus musculus OX=10090 GN=Serpina1e PE=1 SV=1	-2.71e+18	0	152.418	35	13	532	5	5	1	2107.67	532	13	0	>sp|Q00898|A1AT5_MOUSE Alpha-1-antitrypsin 1-5 OS=Mus musculus OX=10090 GN=Serpina1e PE=1 SV=1	2.14	0.27	2.3	1.62	0.6	0.31	-0.36	2.07	-0.01	-1.12	-1.63	-0.57	-0.66	-0.72	-1.19	0.11	1.45	-2.73	-4.14	-3.53	-2.17	-2.27	-1.12	-2.24	-1.26	0.62	2.46	-1.1	1.08	1.69	0.38	0.17	1.17
Q99JB8	Pacsin3	Protein kinase C and casein kinase II substrate protein 3 OS=Mus musculus OX=10090 GN=Pacsin3 PE=1 SV=1	4.04e+18	0	152.174	56	19	374	9	19	1	1351.86	374	19	0	>sp|Q99JB8|PACN3_MOUSE Protein kinase C and casein kinase II substrate protein 3 OS=Mus musculus OX=10090 GN=Pacsin3 PE=1 SV=1	0.31	0.3	0.06	0.01	0.15	0.1	0.14	0.11	0.14	0.11	0.12	0.07	0.16	0.23	0.21	0.02	0.09	0.17	0.11	-0.23	-0.15	0.02	0.15	-0.05	0.15	0.09	0.6	0.22	0.09	-0.13	0.19	0.03	-0.1
P51667	Myl2	Myosin regulatory light chain 2, ventricular/cardiac muscle isoform OS=Mus musculus OX=10090 GN=Myl2 PE=1 SV=3	8.02e+18	0	151.861	78	12	1239	3	8	1	4662.36	1239	12	6	>sp|P51667|MLRV_MOUSE Myosin regulatory light chain 2, ventricular/cardiac muscle isoform OS=Mus musculus OX=10090 GN=Myl2 PE=1 SV=3	-1.19	-0.54	-0.71	-0.15	0.11	-0.34	0.54	-0.04	-0.1	0.13	-0.14	-0.85	-0.42	0.02	0.9	-0.18	-0.37	-1.55	-1.01	-0.14	-0.23	0.3	0.7	-0.5	0.44	-0.07	0.05	0.05	-0.2	-0.34	-0.22	0.2	0.45
P21981	Tgm2	Protein-glutamine gamma-glutamyltransferase 2 OS=Mus musculus OX=10090 GN=Tgm2 PE=1 SV=4	-5.28e+18	0	151.766	44	22	318	19	22	1	1154.66	318	22	0	>sp|P21981|TGM2_MOUSE Protein-glutamine gamma-glutamyltransferase 2 OS=Mus musculus OX=10090 GN=Tgm2 PE=1 SV=4	0.13	0.13	0.13	0.17	0.03	0.36	0.34	0.22	0.42	0.34	0.09	0.1	-0.03	0.15	0.09	0.08	0.01	-0.06	-0.11	0.15	0.05	0.08	0.62	0.33	0.06	0.32	0.07	-0.04	-0.07	0.04	-0.01	0.08	0.08
Q9Z2I8	Suclg2	Succinate--CoA ligase [GDP-forming] subunit beta, mitochondrial OS=Mus musculus OX=10090 GN=Suclg2 PE=1 SV=3	3.02e+18	0	151.425	57	21	271	1	21	1	854.94	271	21	0	>sp|Q9Z2I8|SUCB2_MOUSE Succinate--CoA ligase [GDP-forming] subunit beta, mitochondrial OS=Mus musculus OX=10090 GN=Suclg2 PE=1 SV=3	0.11	0.18	0.33	0.36	-0.04	-0.02	-0.09	-0.13	0.4	0.12	-0.29	-0.26	0.51	0.56	0.63	0.68	0.37	0.32	0.44	0.03	-0.07	-0.04	-0.2	0.45	0.16	0.22	-0.19	-0.01	0.04	0.13	-0.06	0.21	0.1
Q8JZQ2	Afg3l2	AFG3-like protein 2 OS=Mus musculus OX=10090 GN=Afg3l2 PE=1 SV=1	-5.9e+18	0	151.375	43	30	330	24	29	1	1075.94	330	30	1	>sp|Q8JZQ2|AFG32_MOUSE AFG3-like protein 2 OS=Mus musculus OX=10090 GN=Afg3l2 PE=1 SV=1	-0.22	-0.23	-0.15	-0.06	-0.03	-0.09	-0.01	0.05	0.07	0.04	-0.09	-0.24	-0.02	-0.06	0.09	-0.04	-0.13	-0.07	-0.03	0.02	0.14	0.15	0.15	-0.04	0	-0.04	0.09	-0.01	-0.14	-0.14	-0.16	-0.11	0.1
Q922F4	Tubb6	Tubulin beta-6 chain OS=Mus musculus OX=10090 GN=Tubb6 PE=1 SV=1	8.63e+18	0	151.328	53	19	637	7	7	1	2123.11	637	19	0	>sp|Q922F4|TBB6_MOUSE Tubulin beta-6 chain OS=Mus musculus OX=10090 GN=Tubb6 PE=1 SV=1	0.28	0.27	0.31	0.21	-0.08	0.58	0.05	-0.03	0.19	0.12	0.2	0.11	-0.11	0.03	0.05	0.2	-0.21	0.3	0.3	-0.16	-0.14	-0.12	-0.21	0.2	-0.08	0.64	-0.13	-0.11	-0.02	-0.05	0.05	0.03	0.02
A0A0R4J166	Klhl40	Isoform of Q9D783, Kelch-like protein 40 OS=Mus musculus OX=10090 GN=Klhl40 PE=1 SV=1	-5.12e+18	0	151.264	43	21	375	0	21	1	1302.23	375	21	0	>tr|A0A0R4J166|A0A0R4J166_MOUSE Isoform of Q9D783, Kelch-like protein 40 OS=Mus musculus OX=10090 GN=Klhl40 PE=1 SV=1	0.22	0.13	0.16	-0.04	-0.08	-0.09	0.04	-0.07	-0.22	-0.2	0.1	-0.16	0	-0.06	-0.08	-0.13	-0.19	-0.03	-0.13	-0.16	0.02	-0.24	-0.12	-0.07	0.16	0.4	0.28	0.03	-0.14	-0.21	-0.11	-0.13	0.26
P61979-2	Hnrnpk	Isoform of P61979, Isoform 2 of Heterogeneous nuclear ribonucleoprotein K OS=Mus musculus OX=10090 GN=Hnrnpk	-1.58e+18	0	151.064	57	21	409	0	1	1	1408.33	409	21	0	>sp|P61979-2|HNRPK_MOUSE Isoform of P61979, Isoform 2 of Heterogeneous nuclear ribonucleoprotein K OS=Mus musculus OX=10090 GN=Hnrnpk	NaN	0.26	-0.43	-0.26	0.16	0.04	-0.08	NaN	-0.09	-0.13	0.11	0.13	NaN	0.7	-0.21	NaN	NaN	-0.11	-0.15	-0.44	NaN	NaN	0.01	0	NaN	NaN	0.21	NaN	-0.37	NaN	-0.13	NaN	-0.25
A0JNY3	Gphn	Isoform of Q8BUV3, Gephyrin OS=Mus musculus OX=10090 GN=Gphn PE=1 SV=1	3.29e+18	0	150.723	47	24	193	0	24	1	637.7	193	24	0	>tr|A0JNY3|A0JNY3_MOUSE Isoform of Q8BUV3, Gephyrin OS=Mus musculus OX=10090 GN=Gphn PE=1 SV=1	-0.09	0.05	0.18	-0.06	-0.04	-0.08	0.13	-0.02	0.09	0.14	0.01	-0.06	0.04	-0.1	-0.32	0.16	0.09	0.1	0.11	0.03	-0.15	0.17	0	0.05	-0.29	0.15	-0.22	-0.18	0.07	-0.32	0.13	-0.13	0.02
P97449	Anpep	Aminopeptidase N OS=Mus musculus OX=10090 GN=Anpep PE=1 SV=4	3.36e+18	0	150.665	34	24	187	15	24	1	679.07	187	24	0	>sp|P97449|AMPN_MOUSE Aminopeptidase N OS=Mus musculus OX=10090 GN=Anpep PE=1 SV=4	0.05	0.03	-0.12	-0.16	-0.14	-0.21	-0.32	-0.25	-0.14	-0.39	-0.28	0.27	-0.29	-0.08	-0.27	-0.34	-0.34	-0.09	-0.35	-0.07	-0.26	-0.05	-0.12	-0.32	-0.19	-0.19	-0.05	-0.3	-0.11	0.09	-0.16	-0.16	-0.24
Q8BFZ3	Actbl2	Beta-actin-like protein 2 OS=Mus musculus OX=10090 GN=Actbl2 PE=1 SV=1	-8.72e+18	0	150.594	31	14	10673	2	2	1	30694.5	10673	14	0	>sp|Q8BFZ3|ACTBL_MOUSE Beta-actin-like protein 2 OS=Mus musculus OX=10090 GN=Actbl2 PE=1 SV=1	0.11	0.05	0.05	-0.21	-0.04	NaN	NaN	0.17	NaN	-0.13	-0.02	0.24	-0.16	0.41	-0.44	-0.17	NaN	-0.06	NaN	NaN	0.17	NaN	NaN	NaN	0.1	NaN	0.21	0.13	NaN	0.25	NaN	0.41	-0.3
Q91VK2	Eef1d	Isoform of P57776, Eef1d protein OS=Mus musculus OX=10090 GN=Eef1d PE=1 SV=1	-6.34e+18	0	149.933	70	17	356	0	1	1	1273.8	356	17	0	>tr|Q91VK2|Q91VK2_MOUSE Isoform of P57776, Eef1d protein OS=Mus musculus OX=10090 GN=Eef1d PE=1 SV=1	-0.24	-0.52	0.07	-0.11	0.22	-0.36	NaN	0.41	0.19	0.34	0.05	0	-0.17	-0.32	-0.34	-0.24	0.05	-0.13	NaN	NaN	0.44	0.3	0.42	NaN	0.27	-0.41	0.73	-0.01	NaN	0.13	NaN	0.09	0.14
P17183	Eno2	Gamma-enolase OS=Mus musculus OX=10090 GN=Eno2 PE=1 SV=2	4.67e+18	0	149.882	52	16	1544	0	8	1	6276.22	1544	16	0	>sp|P17183|ENOG_MOUSE Gamma-enolase OS=Mus musculus OX=10090 GN=Eno2 PE=1 SV=2	-0.07	-0.45	-0.1	0.08	-0.05	0.16	0.08	0.12	0.35	0.48	0.22	0.3	-0.32	-0.06	-0.1	-0.36	0.27	0.01	-0.11	-0.31	0.06	-0.1	-0.15	0.21	0.18	-0.44	-0.24	0.04	-0.12	-0.28	0.18	0.25	-0.03
Q9CQF9	Pcyox1	Prenylcysteine oxidase OS=Mus musculus OX=10090 GN=Pcyox1 PE=1 SV=1	-5.71e+18	0	149.87	42	13	170	4	13	1	642.51	170	13	0	>sp|Q9CQF9|PCYOX_MOUSE Prenylcysteine oxidase OS=Mus musculus OX=10090 GN=Pcyox1 PE=1 SV=1	0.13	0.04	0.12	0.13	0.03	-0.09	0.16	0.21	0.13	0.18	0.15	0.12	0.19	0.22	0.06	0.26	-0.01	0.03	-0.08	-0.03	0.08	0.12	0.15	-0.14	-0.07	-0.13	-0.16	0.04	-0.07	0.01	0.15	0.07	0.04
Q99LC3	Ndufa10	NADH dehydrogenase [ubiquinone] 1 alpha subcomplex subunit 10, mitochondrial OS=Mus musculus OX=10090 GN=Ndufa10 PE=1 SV=1	4.94e+18	0	149.616	70	18	507	14	18	1	2044.54	507	18	0	>sp|Q99LC3|NDUAA_MOUSE NADH dehydrogenase [ubiquinone] 1 alpha subcomplex subunit 10, mitochondrial OS=Mus musculus OX=10090 GN=Ndufa10 PE=1 SV=1	-0.44	-0.38	0.08	0.08	0.15	0.11	0.1	0.01	0.09	0.05	-0.02	-0.3	0.05	0.15	0.34	-0.03	0.1	-0.18	0.06	0.03	0.09	0.01	-0.11	-0.13	0.12	0.12	-0.02	0.09	0.11	0.06	0.09	0.25	0.21
Q8CI51	Pdlim5	PDZ and LIM domain protein 5 OS=Mus musculus OX=10090 GN=Pdlim5 PE=1 SV=4	5.83e+18	0	149.561	24	13	932	0	3	1	3866.19	932	13	0	>sp|Q8CI51|PDLI5_MOUSE PDZ and LIM domain protein 5 OS=Mus musculus OX=10090 GN=Pdlim5 PE=1 SV=4	-0.35	-0.14	-0.26	-0.21	-0.07	-0.02	-0.05	-0.22	NaN	0.01	-0.16	0.4	0.05	0.17	-0.14	0.15	0.06	-0.24	0.09	0.64	0.19	0.15	0.31	0.05	-0.08	-0.15	0.26	-0.04	0.12	0.29	0.13	0.09	0.01
Q3TCH7	Cul4a	Cullin-4A OS=Mus musculus OX=10090 GN=Cul4a PE=1 SV=1	-8.83e+18	0	149.261	41	31	245	14	21	1	736.68	245	31	10	>sp|Q3TCH7|CUL4A_MOUSE Cullin-4A OS=Mus musculus OX=10090 GN=Cul4a PE=1 SV=1	0.06	-0.17	-0.05	-0.09	0.2	-0.18	0.01	-0.02	0.01	0.07	-0.12	-0.2	-0.11	-0.33	-0.31	-0.1	-0.17	0.22	0.07	-0.38	-0.13	0.08	-0.25	-0.47	-0.17	-0.08	-0.57	-0.03	-0.21	-0.17	-0.08	-0.11	-0.01
P28474	Adh5	Alcohol dehydrogenase class-3 OS=Mus musculus OX=10090 GN=Adh5 PE=1 SV=3	-1.24e+18	0	149.221	50	14	324	12	14	1	1237.36	324	14	0	>sp|P28474|ADHX_MOUSE Alcohol dehydrogenase class-3 OS=Mus musculus OX=10090 GN=Adh5 PE=1 SV=3	0.13	0.14	0.08	0.07	0.18	0.09	0.14	0.12	0.09	0.19	0.2	0.03	0.14	0.12	-0.01	0.1	0.16	0.04	0.19	-0.12	0.01	-0.06	-0.12	0	0.1	0.04	-0.1	0.13	0.03	-0.06	0.15	0.09	0.08
Q8C8R3-4	Ank2	Isoform of Q8C8R3, Isoform 4 of Ankyrin-2 OS=Mus musculus OX=10090 GN=Ank2	-1.19e+18	0	149.123	11	25	213	0	17	1	698.04	213	25	0	>sp|Q8C8R3-4|ANK2_MOUSE Isoform of Q8C8R3, Isoform 4 of Ankyrin-2 OS=Mus musculus OX=10090 GN=Ank2	-0.36	0.13	-0.25	0.14	-0.02	NaN	0.01	0.07	0.13	-0.29	-0.31	-0.4	-0.2	-0.17	-0.04	-0.09	-0.19	-0.33	-0.02	-0.38	0.02	0.25	-0.45	-0.59	-0.27	-0.03	0.1	-0.05	-0.15	-0.13	0.11	-0.1	0.21
P02089	Hbb-b2	Hemoglobin subunit beta-2 OS=Mus musculus OX=10090 GN=Hbb-b2 PE=1 SV=2	8.38e+18	0	149.1	86	15	1845	7	7	1	5619.4	1845	15	0	>sp|P02089|HBB2_MOUSE Hemoglobin subunit beta-2 OS=Mus musculus OX=10090 GN=Hbb-b2 PE=1 SV=2	-0.62	-0.28	-2	-2.07	-0.41	0.53	-1.85	0.35	-2.82	-2.7	-2.11	-2.29	-1.97	-1.88	-2.12	-1.86	-2.44	1.2	0.29	0.68	-0.19	0.28	0.42	-2.01	-2.42	-0.68	-0.43	0.29	-1.96	-2.37	-2.16	-2	-1.92
Q8QZS1	Hibch	3-hydroxyisobutyryl-CoA hydrolase, mitochondrial OS=Mus musculus OX=10090 GN=Hibch PE=1 SV=1	7.46e+18	0	148.972	59	19	378	6	19	1	1292.66	378	19	0	>sp|Q8QZS1|HIBCH_MOUSE 3-hydroxyisobutyryl-CoA hydrolase, mitochondrial OS=Mus musculus OX=10090 GN=Hibch PE=1 SV=1	-0.2	-0.04	0.04	0.14	0.14	0.09	0.08	0.16	0.33	0.15	0.03	0.01	0.33	0.33	0.67	0.34	-0.02	-0.12	-0.01	0.02	0.11	0.03	-0.09	0.19	0.1	-0.03	-0.09	0.06	0	0.28	0.01	0.3	0.14
F8WIV2	Serpinb6a	Isoform of Q60854, Serine (or cysteine) peptidase inhibitor, clade B, member 6a OS=Mus musculus OX=10090 GN=Serpinb6a PE=1 SV=1	5.12e+18	0	148.939	53	18	518	0	18	1	1837.88	518	18	0	>tr|F8WIV2|F8WIV2_MOUSE Isoform of Q60854, Serine (or cysteine) peptidase inhibitor, clade B, member 6a OS=Mus musculus OX=10090 GN=Serpinb6a PE=1 SV=1	0.49	0.41	0	-0.03	-0.08	0.06	-0.09	-0.16	-0.12	0.07	0.02	0.04	-0.24	-0.33	-0.43	-0.15	0.02	0.29	0.24	0.01	0.18	-0.1	-0.17	-0.1	0.05	0.46	0.31	-0.03	-0.07	-0.19	-0.05	-0.11	-0.28
O88322	Nid2	Nidogen-2 OS=Mus musculus OX=10090 GN=Nid2 PE=1 SV=2	8.43e+18	0	148.74	25	24	256	2	23	1	873.59	256	24	0	>sp|O88322|NID2_MOUSE Nidogen-2 OS=Mus musculus OX=10090 GN=Nid2 PE=1 SV=2	-0.05	-0.14	0.04	0.14	-0.02	0.01	-0.01	-0.12	0.3	0.05	0.11	0.12	-0.21	-0.06	-0.05	0.14	-0.06	-0.11	0.04	0.06	0.85	-0.02	0.18	0.02	0.12	-0.09	0.11	0.23	0.01	0.13	-0.11	0.01	0.05
Q99KC8	Vwa5a	von Willebrand factor A domain-containing protein 5A OS=Mus musculus OX=10090 GN=Vwa5a PE=1 SV=2	5.94e+18	0	148.584	39	24	335	19	24	1	1114.4	335	24	0	>sp|Q99KC8|VMA5A_MOUSE von Willebrand factor A domain-containing protein 5A OS=Mus musculus OX=10090 GN=Vwa5a PE=1 SV=2	0.02	0.06	-0.13	-0.19	-0.36	-0.31	-0.07	-0.16	-0.1	-0.08	-0.19	-0.05	-0.18	-0.15	-0.34	-0.29	-0.29	-0.1	0.02	-0.16	-0.22	-0.19	-0.09	-0.16	-0.21	-0.18	-0.01	-0.26	-0.05	-0.15	-0.06	-0.22	-0.15
Q8BZ71	Stac3	SH3 and cysteine-rich domain-containing protein 3 OS=Mus musculus OX=10090 GN=Stac3 PE=1 SV=1	3.63e+16	0	148.447	56	20	386	20	20	1	1309.61	386	20	0	>sp|Q8BZ71|STAC3_MOUSE SH3 and cysteine-rich domain-containing protein 3 OS=Mus musculus OX=10090 GN=Stac3 PE=1 SV=1	0.3	0.18	0.12	0.02	0.08	-0.1	0.11	0.13	-0.02	0.2	0.23	0.07	0.03	-0.03	-0.09	0.01	0.09	0.22	0.29	-0.02	0.18	0.16	0.04	0.1	0.18	-0.12	-0.17	0.11	0.06	-0.08	0.2	0.07	0.07
Q91VR5	Ddx1	ATP-dependent RNA helicase DDX1 OS=Mus musculus OX=10090 GN=Ddx1 PE=1 SV=1	-3.52e+18	0	148.366	42	24	331	20	24	1	1133.12	331	24	0	>sp|Q91VR5|DDX1_MOUSE ATP-dependent RNA helicase DDX1 OS=Mus musculus OX=10090 GN=Ddx1 PE=1 SV=1	-0.07	-0.06	0.03	0.06	-0.03	-0.05	-0.11	0	-0.16	-0.12	-0.02	0.01	-0.01	-0.05	-0.02	0.09	0.04	0.01	-0.01	-0.1	-0.07	0.2	0.09	0.03	0.02	0	0	-0.05	0.01	0.08	0.06	0.1	0.06
Q99KJ8	Dctn2	Dynactin subunit 2 OS=Mus musculus OX=10090 GN=Dctn2 PE=1 SV=3	4.41e+18	0	148.131	60	18	308	18	18	1	1110.83	308	18	0	>sp|Q99KJ8|DCTN2_MOUSE Dynactin subunit 2 OS=Mus musculus OX=10090 GN=Dctn2 PE=1 SV=3	0.1	0.38	0.11	0.1	0.06	0.17	0.04	-0.02	-0.1	0.05	0.14	0.11	0.07	0.03	0.04	0.27	0.15	0.15	0.12	-0.09	-0.06	-0.18	-0.23	0.06	-0.01	0.08	-0.03	-0.02	0.08	0.05	0.15	0.08	0.26
Q9WTR5	Cdh13	Cadherin-13 OS=Mus musculus OX=10090 GN=Cdh13 PE=1 SV=2	8.41e+18	0	148.009	33	18	298	18	18	1	1060.56	298	18	0	>sp|Q9WTR5|CAD13_MOUSE Cadherin-13 OS=Mus musculus OX=10090 GN=Cdh13 PE=1 SV=2	0.28	0.36	-0.08	-0.12	-0.07	-0.02	0.06	-0.04	0	0	0.29	0.12	0.07	0.04	0.08	-0.04	-0.08	0.08	0.07	-0.31	-0.11	-0.16	-0.16	0.14	0.27	0.1	-0.04	0.08	-0.02	-0.03	0.02	0.04	0.02
V9GWW6	Mlip	Isoform of Q5FW52, Muscular LMNA-interacting protein OS=Mus musculus OX=10090 GN=Mlip PE=1 SV=1	3.61e+18	0	147.948	39	23	207	0	23	1	755.56	207	23	0	>tr|V9GWW6|V9GWW6_MOUSE Isoform of Q5FW52, Muscular LMNA-interacting protein OS=Mus musculus OX=10090 GN=Mlip PE=1 SV=1	0.14	-0.04	0.13	0.02	0.13	0.11	0.19	0.05	0.09	0.08	-0.02	0.03	-0.08	-0.11	-0.06	-0.16	-0.07	-0.25	-0.12	0.11	0.15	0	-0.02	0.02	0.15	0.14	0.06	0.13	0.17	-0.08	0.06	-0.12	0.11
Q6ZQ38	Cand1	Cullin-associated NEDD8-dissociated protein 1 OS=Mus musculus OX=10090 GN=Cand1 PE=1 SV=2	6.35e+18	0	147.639	25	25	265	20	24	1	840.89	265	25	0	>sp|Q6ZQ38|CAND1_MOUSE Cullin-associated NEDD8-dissociated protein 1 OS=Mus musculus OX=10090 GN=Cand1 PE=1 SV=2	0.01	0.01	-0.17	-0.08	-0.05	0	-0.06	-0.15	0.05	0.05	-0.05	0.03	0.01	-0.11	-0.16	0.09	0.06	-0.02	-0.14	0.06	-0.07	0.12	-0.03	-0.09	-0.04	0.05	-0.24	-0.05	-0.09	0	-0.13	-0.01	-0.04
Q9CR68	Uqcrfs1	Cytochrome b-c1 complex subunit Rieske, mitochondrial OS=Mus musculus OX=10090 GN=Uqcrfs1 PE=1 SV=1	1.32e+18	0	147.552	53	15	684	15	15	1	2302.01	684	15	0	>sp|Q9CR68|UCRI_MOUSE Cytochrome b-c1 complex subunit Rieske, mitochondrial OS=Mus musculus OX=10090 GN=Uqcrfs1 PE=1 SV=1	-0.31	-0.22	0.03	0.06	0.2	-0.02	0.09	0	0.2	-0.02	0.06	-0.23	0.13	0.21	0.36	0.13	0.03	-0.17	0.06	0.07	0.07	0.11	0.06	-0.07	0.14	0.07	0.18	0.12	0.12	0.12	0.05	0.1	0.14
Q9QYG0	Ndrg2	Protein NDRG2 OS=Mus musculus OX=10090 GN=Ndrg2 PE=1 SV=1	3.37e+18	0	147.212	55	12	599	0	12	1	2139.98	599	12	0	>sp|Q9QYG0|NDRG2_MOUSE Protein NDRG2 OS=Mus musculus OX=10090 GN=Ndrg2 PE=1 SV=1	0.01	-0.08	0.13	0.11	0.19	-0.22	0.07	-0.03	-0.03	0.15	0.26	-0.01	-0.15	-0.26	-0.1	-0.12	0.12	-0.06	0	-0.15	0.2	-0.11	-0.05	0.04	0.18	0.16	-0.21	0.14	-0.09	-0.25	-0.04	-0.13	0.26
P28653	Bgn	Biglycan OS=Mus musculus OX=10090 GN=Bgn PE=1 SV=1	-1.64e+18	0	147.118	51	14	396	13	13	1	1607.13	396	14	0	>sp|P28653|PGS1_MOUSE Biglycan OS=Mus musculus OX=10090 GN=Bgn PE=1 SV=1	0.25	0.92	0.26	-0.15	-0.43	-0.36	-0.32	-0.1	-0.6	-0.48	-0.27	0.7	-0.49	-0.1	0.11	-0.39	-0.41	-0.86	-0.72	-0.13	0.03	-0.49	-0.3	-0.76	0.53	0.41	0.48	-0.3	0.55	0.2	-0.04	0.13	0.27
E9PVA8	Gcn1	eIF-2-alpha kinase activator GCN1 OS=Mus musculus OX=10090 GN=Gcn1 PE=1 SV=1	-1.91e+18	0	146.707	16	33	172	32	33	1	543.42	172	33	0	>sp|E9PVA8|GCN1_MOUSE eIF-2-alpha kinase activator GCN1 OS=Mus musculus OX=10090 GN=Gcn1 PE=1 SV=1	0.09	-0.03	-0.13	-0.06	0.06	0.16	-0.01	-0.01	-0.08	0.12	-0.07	-0.17	0.04	-0.08	-0.2	-0.01	0.05	-0.01	0.01	-0.01	-0.02	-0.06	0.15	-0.24	-0.03	-0.22	0.09	0	-0.01	-0.03	0.01	-0.03	0.05
A0A1L1STE6	Idh3a	Isoform of Q9D6R2, Isocitrate dehydrogenase [NAD] subunit, mitochondrial OS=Mus musculus OX=10090 GN=Idh3a PE=1 SV=1	-2.36e+18	0	146.419	51	18	962	0	18	1	3067.86	962	18	0	>tr|A0A1L1STE6|A0A1L1STE6_MOUSE Isoform of Q9D6R2, Isocitrate dehydrogenase [NAD] subunit, mitochondrial OS=Mus musculus OX=10090 GN=Idh3a PE=1 SV=1	-0.11	-0.05	0.01	0.02	0.14	-0.02	0.16	0.04	0.15	-0.06	0.06	-0.17	0.08	-0.07	0.26	0.16	-0.01	-0.11	0.21	-0.2	0.02	-0.02	-0.07	-0.04	0.19	0.19	-0.01	0.15	0	-0.01	0.03	0.06	0.06
P62814	Atp6v1b2	V-type proton ATPase subunit B, brain isoform OS=Mus musculus OX=10090 GN=Atp6v1b2 PE=1 SV=1	-5.41e+18	0	146.053	62	19	175	14	19	1	714.83	175	19	0	>sp|P62814|VATB2_MOUSE V-type proton ATPase subunit B, brain isoform OS=Mus musculus OX=10090 GN=Atp6v1b2 PE=1 SV=1	0.17	-0.05	0.04	0.08	-0.1	0.31	0.04	-0.06	0.14	0.18	0.06	0.11	0.1	0.03	0.18	0.16	0.06	0.25	0.2	-0.02	-0.28	-0.11	0.35	0.21	0.12	0.07	-0.15	-0.03	0.06	0.31	0.01	0.1	-0.05
P51125	Cast	Calpastatin OS=Mus musculus OX=10090 GN=Cast PE=1 SV=2	2.7e+18	0	146.001	35	17	215	0	3	1	835.02	215	17	14	>sp|P51125|ICAL_MOUSE Calpastatin OS=Mus musculus OX=10090 GN=Cast PE=1 SV=2	-0.26	-0.07	0.26	0.23	-0.19	0.03	-0.16	-0.01	-0.11	-0.2	-0.12	-0.01	-0.18	-0.06	0.03	-0.01	-0.15	-0.18	-0.25	0.33	-0.1	-0.25	-0.22	-0.25	-0.25	0.15	0.31	0.13	-0.11	-0.04	-0.2	-0.04	0.07
Q63918	Cavin2	Caveolae-associated protein 2 OS=Mus musculus OX=10090 GN=Cavin2 PE=1 SV=3	-5.09e+18	0	145.64	46	17	303	17	17	1	1053.39	303	17	0	>sp|Q63918|CAVN2_MOUSE Caveolae-associated protein 2 OS=Mus musculus OX=10090 GN=Cavin2 PE=1 SV=3	-0.3	0.01	-0.15	0.2	0.03	0.34	0.22	0.05	0.72	0.1	0.13	0.24	0.42	0.51	0.87	0.61	0.03	-0.16	0.14	0.37	0.01	0.22	0.11	0.41	0.01	0.03	0.04	-0.12	0.12	0.46	0.03	0.45	0.01
P18654	Rps6ka3	Ribosomal protein S6 kinase alpha-3 OS=Mus musculus OX=10090 GN=Rps6ka3 PE=1 SV=2	5.31e+18	0	145.111	42	27	259	0	16	1	787.88	259	27	12	>sp|P18654|KS6A3_MOUSE Ribosomal protein S6 kinase alpha-3 OS=Mus musculus OX=10090 GN=Rps6ka3 PE=1 SV=2	0.17	0.1	-0.01	-0.01	-0.13	-0.06	0.33	-0.06	0.07	0.15	-0.01	-0.02	-0.06	-0.08	-0.17	0	0.05	-0.01	-0.14	-0.1	0.03	-0.03	-0.18	0.19	-0.01	0.08	-0.15	-0.1	-0.13	-0.2	-0.02	-0.08	-0.03
Q58A65	Spag9	C-Jun-amino-terminal kinase-interacting protein 4 OS=Mus musculus OX=10090 GN=Spag9 PE=1 SV=2	5.18e+18	0	145.065	28	28	163	0	28	1	591.04	163	28	0	>sp|Q58A65|JIP4_MOUSE C-Jun-amino-terminal kinase-interacting protein 4 OS=Mus musculus OX=10090 GN=Spag9 PE=1 SV=2	0.15	0.05	0.19	0.09	-0.21	-0.01	0.15	-0.13	0.13	0.17	0.15	-0.05	0.07	0.02	0.03	-0.06	-0.08	-0.21	-0.11	-0.14	-0.02	-0.04	-0.04	0.22	0.12	0.21	-0.06	0.06	-0.2	-0.14	-0.05	-0.09	0.09
P15626	Gstm2	Glutathione S-transferase Mu 2 OS=Mus musculus OX=10090 GN=Gstm2 PE=1 SV=2	-3.01e+17	0	144.996	72	19	538	3	9	1	2009.2	538	19	11	>sp|P15626|GSTM2_MOUSE Glutathione S-transferase Mu 2 OS=Mus musculus OX=10090 GN=Gstm2 PE=1 SV=2	0.07	0.17	-0.07	0.04	0.07	0.02	0.13	0.47	0.53	0.65	0.2	0.15	0.06	0.31	0.08	0.2	0.09	0.62	0.4	-0.22	0.09	0.2	0.03	-0.01	0.12	-0.02	-0.07	0.15	-0.17	-0.18	0.17	0.22	0.08
Q9D020-1	Nt5c3a	Isoform of Q9D020, Isoform 1 of Cytosolic 5'-nucleotidase 3A OS=Mus musculus OX=10090 GN=Nt5c3a	1.72e+18	0	144.914	69	18	349	1	18	1	1085.57	349	18	0	>sp|Q9D020-1|5NT3A_MOUSE Isoform of Q9D020, Isoform 1 of Cytosolic 5'-nucleotidase 3A OS=Mus musculus OX=10090 GN=Nt5c3a	0.05	-0.07	-0.03	-0.11	-0.11	0.04	0.15	0.17	-0.05	0.13	-0.14	-0.22	-0.1	-0.24	-0.19	-0.1	-0.11	0.03	0.16	0.08	0.29	-0.26	-0.42	-0.25	-0.17	0.11	-0.48	0.01	-0.2	-0.25	-0.07	-0.13	-0.01
P34914	Ephx2	Bifunctional epoxide hydrolase 2 OS=Mus musculus OX=10090 GN=Ephx2 PE=1 SV=2	5.02e+18	0	144.532	50	18	244	4	18	1	910.8	244	18	0	>sp|P34914|HYES_MOUSE Bifunctional epoxide hydrolase 2 OS=Mus musculus OX=10090 GN=Ephx2 PE=1 SV=2	-0.1	0.11	-0.14	-0.12	0.03	-0.1	-0.16	0.15	-0.13	-0.25	-0.08	-0.4	0.23	0.17	0.52	0.25	0.05	-0.23	0.22	0.24	-0.05	0.26	0.06	0.14	0.03	-0.07	-0.24	-0.05	0.23	0.14	0.1	0.31	-0.13
Q9CZ44-3	Nsfl1c	Isoform of Q9CZ44, Isoform 3 of NSFL1 cofactor p47 OS=Mus musculus OX=10090 GN=Nsfl1c	3.21e+18	0	144.347	62	21	305	0	21	1	1224.77	305	21	0	>sp|Q9CZ44-3|NSF1C_MOUSE Isoform of Q9CZ44, Isoform 3 of NSFL1 cofactor p47 OS=Mus musculus OX=10090 GN=Nsfl1c	0.05	0.07	0.1	0	-0.09	0.03	0.02	0.08	-0.17	0.04	0.07	0	0.01	0.03	-0.04	-0.06	-0.08	0.16	0.16	-0.01	0.09	-0.03	0.13	0.12	0.01	0.07	-0.09	0.03	-0.11	-0.18	0	-0.02	0.11
P19324	Serpinh1	Serpin H1 OS=Mus musculus OX=10090 GN=Serpinh1 PE=1 SV=3	5.13e+18	0	144.238	54	20	386	9	20	1	1324.13	386	20	0	>sp|P19324|SERPH_MOUSE Serpin H1 OS=Mus musculus OX=10090 GN=Serpinh1 PE=1 SV=3	-0.07	-0.22	-0.27	-0.09	-0.51	-0.32	-0.32	-0.42	-0.37	-0.34	-0.84	-0.2	-0.39	-0.45	-0.54	0.08	-0.04	-0.32	-0.46	0.28	0.11	0.15	0.21	-0.48	-0.26	-0.08	0.19	-0.54	-0.13	0.07	-0.12	-0.32	0.03
B2M1R6	Hnrnpk	Isoform of P61979, Heterogeneous nuclear ribonucleoprotein K OS=Mus musculus OX=10090 GN=Hnrnpk PE=1 SV=1	6.19e+18	0	144.037	54	21	401	0	1	1	1373.46	401	21	22	>tr|B2M1R6|B2M1R6_MOUSE Isoform of P61979, Heterogeneous nuclear ribonucleoprotein K OS=Mus musculus OX=10090 GN=Hnrnpk PE=1 SV=1	0.08	0.19	-0.09	-0.04	0.01	0.1	0.09	-0.07	0.17	0.15	-0.06	0.25	0.09	0.26	0.1	0.01	0.27	-0.05	0	0.21	-0.07	-0.02	0.05	0.46	0.11	0.05	0.23	0.04	0	0.25	-0.01	0.12	-0.07
O35643	Ap1b1	AP-1 complex subunit beta-1 OS=Mus musculus OX=10090 GN=Ap1b1 PE=1 SV=2	-6.9e+18	0	143.934	37	25	264	0	15	1	865.19	264	25	0	>sp|O35643|AP1B1_MOUSE AP-1 complex subunit beta-1 OS=Mus musculus OX=10090 GN=Ap1b1 PE=1 SV=2	0.03	-0.03	0.01	-0.05	-0.08	0.03	-0.13	-0.04	-0.13	-0.05	-0.02	0.1	0.08	0.16	-0.05	0.02	-0.11	-0.02	-0.2	0.06	-0.06	0.11	0.06	-0.19	-0.07	-0.02	0.01	-0.03	-0.05	0.14	-0.08	0.06	0.1
Q923T9-2	Camk2g	Isoform of Q923T9, Isoform 2 of Calcium/calmodulin-dependent protein kinase type II subunit gamma OS=Mus musculus OX=10090 GN=Camk2g	2.47e+18	0	143.392	44	17	292	0	3	1	1068.93	292	17	10	>sp|Q923T9-2|KCC2G_MOUSE Isoform of Q923T9, Isoform 2 of Calcium/calmodulin-dependent protein kinase type II subunit gamma OS=Mus musculus OX=10090 GN=Camk2g	0.1	0.34	0.08	0.03	0.02	0.19	-0.02	0.07	-0.14	-0.16	0.2	0	-0.03	-0.19	0.02	0.14	-0.05	0.36	0.28	-0.33	-0.18	-0.18	-0.29	0.05	-0.08	0.18	-0.12	-0.01	-0.07	-0.26	-0.05	-0.05	0.01
Q8K1M3	Prkar2a	Isoform of P12367, Protein kinase, cAMP dependent regulatory, type II alpha OS=Mus musculus OX=10090 GN=Prkar2a PE=1 SV=1	-9.18e+17	0	143.38	50	16	473	0	14	1	1941.07	473	16	3	>tr|Q8K1M3|Q8K1M3_MOUSE Isoform of P12367, Protein kinase, cAMP dependent regulatory, type II alpha OS=Mus musculus OX=10090 GN=Prkar2a PE=1 SV=1	0.15	0.33	0.22	0.2	0.06	0.13	0.15	0.17	0.25	0.27	0.18	-0.04	-0.01	0.02	0.09	0.13	0.02	-0.01	0.05	0.08	0.26	0.11	-0.01	0.16	0.14	0.24	0.28	0.25	0.09	0.03	0.12	0.11	-0.01
G3XA17	Eif4g2	Isoform of Q62448, Eukaryotic translation initiation factor 4 gamma 2 OS=Mus musculus OX=10090 GN=Eif4g2 PE=1 SV=1	7.11e+18	0	143.369	33	25	228	0	25	1	714.47	228	25	0	>tr|G3XA17|G3XA17_MOUSE Isoform of Q62448, Eukaryotic translation initiation factor 4 gamma 2 OS=Mus musculus OX=10090 GN=Eif4g2 PE=1 SV=1	0.06	-0.06	-0.04	-0.1	-0.05	-0.22	-0.04	-0.08	-0.18	-0.04	-0.04	-0.18	-0.12	-0.19	-0.3	-0.11	-0.09	0.04	-0.01	-0.17	-0.01	-0.02	-0.12	-0.27	-0.13	-0.16	-0.31	-0.13	-0.17	-0.31	-0.13	-0.21	0
Q9JMA1	Usp14	Ubiquitin carboxyl-terminal hydrolase 14 OS=Mus musculus OX=10090 GN=Usp14 PE=1 SV=3	2.55e+18	0	143.04	55	20	277	0	20	1	918.56	277	20	0	>sp|Q9JMA1|UBP14_MOUSE Ubiquitin carboxyl-terminal hydrolase 14 OS=Mus musculus OX=10090 GN=Usp14 PE=1 SV=3	0.04	0.19	0.15	0.07	-0.03	0.16	0.25	0.11	0.17	0.3	0.13	0.01	-0.53	0.02	-0.04	-0.74	0.07	0.07	0.08	-0.11	-0.03	0.05	-0.06	-0.09	-0.1	0.05	-0.12	0.03	-0.09	-0.17	-0.01	-0.07	0
Q05D44	Eif5b	Eukaryotic translation initiation factor 5B OS=Mus musculus OX=10090 GN=Eif5b PE=1 SV=2	-1.89e+18	0	142.94	26	23	177	23	23	1	659.51	177	23	0	>sp|Q05D44|IF2P_MOUSE Eukaryotic translation initiation factor 5B OS=Mus musculus OX=10090 GN=Eif5b PE=1 SV=2	-0.01	0.08	0.12	0.06	0.05	0.15	0.05	-0.05	0.01	0.02	0.02	-0.07	0.05	-0.22	0.04	0.17	-0.02	0.14	0.01	0.01	0.2	0.02	-0.16	-0.02	-0.07	0.24	-0.52	-0.13	-0.08	0.07	-0.03	-0.06	0.03
Q99L13	Hibadh	3-hydroxyisobutyrate dehydrogenase, mitochondrial OS=Mus musculus OX=10090 GN=Hibadh PE=1 SV=1	-5.43e+17	0	142.754	45	10	247	10	10	1	1045.32	247	10	0	>sp|Q99L13|3HIDH_MOUSE 3-hydroxyisobutyrate dehydrogenase, mitochondrial OS=Mus musculus OX=10090 GN=Hibadh PE=1 SV=1	-0.16	0.02	-0.19	-0.13	0.18	0.01	0.19	0.22	0.39	0.26	0.17	-0.03	0.33	0.48	0.55	0.25	0	-0.21	0.12	0.06	0.16	0.15	0.07	0.26	0.26	-0.12	0.08	0.26	0.18	0.14	0.16	0.26	-0.02
P09405	Ncl	Nucleolin OS=Mus musculus OX=10090 GN=Ncl PE=1 SV=2	-1.94e+18	0	142.729	40	29	491	25	29	1	1527.2	491	29	0	>sp|P09405|NUCL_MOUSE Nucleolin OS=Mus musculus OX=10090 GN=Ncl PE=1 SV=2	0.17	0.23	0.1	0.14	0.09	0.27	0.11	-0.03	0.13	0.05	0.09	0.36	0.26	0.41	0.31	0.16	0.32	-0.05	-0.1	0.43	0.03	-0.1	0.01	0.68	0.17	-0.04	0.28	0.12	0.06	0.34	-0.02	0.13	-0.02
Q61425	Hadh	Hydroxyacyl-coenzyme A dehydrogenase, mitochondrial OS=Mus musculus OX=10090 GN=Hadh PE=1 SV=2	3.11e+18	0	141.741	72	16	504	16	16	1	1922.35	504	16	0	>sp|Q61425|HCDH_MOUSE Hydroxyacyl-coenzyme A dehydrogenase, mitochondrial OS=Mus musculus OX=10090 GN=Hadh PE=1 SV=2	-0.45	-0.27	-0.24	-0.19	-0.11	-0.16	-0.07	0.05	0.27	-0.07	0.02	-0.18	0.16	0.19	0.58	0.15	-0.02	-0.29	0.11	-0.11	-0.09	0.05	-0.12	-0.02	0.07	-0.22	-0.12	-0.03	-0.15	0.12	-0.12	0.3	-0.01
Q05BC3-3	Eml1	Isoform of Q05BC3, Isoform 3 of Echinoderm microtubule-associated protein-like 1 OS=Mus musculus OX=10090 GN=Eml1	-7.77e+18	0	141.69	35	25	298	0	25	1	1145.66	298	25	0	>sp|Q05BC3-3|EMAL1_MOUSE Isoform of Q05BC3, Isoform 3 of Echinoderm microtubule-associated protein-like 1 OS=Mus musculus OX=10090 GN=Eml1	0.26	0.2	0.37	0.19	-0.03	0.01	-0.01	0.24	-0.12	-0.07	0.27	0.12	0.01	0	-0.19	0.13	0.04	0.35	0.17	-0.14	0.13	-0.1	-0.07	-0.16	-0.06	0.02	0.45	0.05	0.05	-0.12	0.11	0	-0.03
G5E924	Hnrnpl	Isoform of Q8R081, Heterogeneous nuclear ribonucleoprotein L (Fragment) OS=Mus musculus OX=10090 GN=Hnrnpl PE=1 SV=1	7.49e+18	0	141.479	51	18	182	1	1	1	691.24	182	18	20	>tr|G5E924|G5E924_MOUSE Isoform of Q8R081, Heterogeneous nuclear ribonucleoprotein L (Fragment) OS=Mus musculus OX=10090 GN=Hnrnpl PE=1 SV=1	0.05	0.25	-0.06	0	0.08	0.07	0.15	-0.13	0.06	0.02	-0.03	0.28	0.08	0.27	0.11	-0.03	0.19	-0.06	-0.11	0.28	-0.12	-0.02	-0.04	0.64	0.11	-0.02	0.11	0.07	-0.01	0.37	-0.07	0.15	-0.13
P16125	Ldhb	L-lactate dehydrogenase B chain OS=Mus musculus OX=10090 GN=Ldhb PE=1 SV=2	7.31e+18	0	141.297	57	17	895	6	15	1	2799.8	895	17	0	>sp|P16125|LDHB_MOUSE L-lactate dehydrogenase B chain OS=Mus musculus OX=10090 GN=Ldhb PE=1 SV=2	-1.21	-0.64	-0.39	-0.17	0.34	-0.51	-0.08	0.36	0.26	-0.03	-0.22	-0.64	-0.33	-0.31	-0.02	-0.11	-0.12	-1.15	-0.31	-0.42	-0.06	0.26	0.25	-0.98	-0.08	-0.08	-0.26	0.28	0.05	-0.19	-0.14	0.08	-0.02
Q8K411	Pitrm1	Presequence protease, mitochondrial OS=Mus musculus OX=10090 GN=Pitrm1 PE=1 SV=1	3.13e+18	0	141.256	32	28	214	0	28	1	636.24	214	28	0	>sp|Q8K411|PREP_MOUSE Presequence protease, mitochondrial OS=Mus musculus OX=10090 GN=Pitrm1 PE=1 SV=1	-0.09	0.11	0.04	0	0.08	0.19	0.08	0.11	0.24	0.14	-0.06	-0.11	0.07	0.01	0.01	0.16	0.1	-0.06	0.01	-0.09	-0.05	-0.13	0.14	0.08	0.17	0.13	-0.09	0.07	0.08	0.14	0.02	0.13	0.04
Q922B2	Dars	Aspartate--tRNA ligase, cytoplasmic OS=Mus musculus OX=10090 GN=Dars PE=1 SV=2	-8.8e+18	0	141.055	59	26	368	23	26	1	1277.98	368	26	0	>sp|Q922B2|SYDC_MOUSE Aspartate--tRNA ligase, cytoplasmic OS=Mus musculus OX=10090 GN=Dars PE=1 SV=2	0.01	-0.12	0.13	0.16	0.02	-0.17	-0.04	0.13	-0.14	-0.04	-0.01	-0.01	0.04	-0.21	-0.17	0.11	0.16	0.07	-0.1	-0.12	0.07	0.15	0.1	-0.13	-0.06	0.08	0.13	-0.02	0.1	0.09	0.28	0.15	0.31
Q8VBT1	Txlnb	Beta-taxilin OS=Mus musculus OX=10090 GN=Txlnb PE=1 SV=2	5.75e+18	0	140.783	36	19	239	19	19	1	956.85	239	19	0	>sp|Q8VBT1|TXLNB_MOUSE Beta-taxilin OS=Mus musculus OX=10090 GN=Txlnb PE=1 SV=2	-0.05	-0.29	-0.06	-0.01	0.1	-0.15	0.01	0.04	-0.07	0.08	-0.08	-0.25	0.06	0.07	-0.08	-0.1	0.02	-0.11	-0.09	-0.14	0.02	0.11	-0.01	-0.15	0.16	-0.05	0.41	0.1	-0.02	-0.21	-0.01	-0.11	0.08
Q9JKR6	Hyou1	Hypoxia up-regulated protein 1 OS=Mus musculus OX=10090 GN=Hyou1 PE=1 SV=1	8.32e+18	0	140.572	33	25	188	15	25	1	645.71	188	25	0	>sp|Q9JKR6|HYOU1_MOUSE Hypoxia up-regulated protein 1 OS=Mus musculus OX=10090 GN=Hyou1 PE=1 SV=1	0.14	0.12	-0.05	0.02	0	0.01	0.02	-0.04	0.01	-0.02	-0.08	0.01	-0.08	-0.03	0.04	0.09	-0.06	-0.07	-0.03	0	-0.08	0.07	0.06	0.13	-0.06	0.05	0.12	-0.08	-0.09	0.08	-0.04	0.05	-0.02
P28654	Dcn	Decorin OS=Mus musculus OX=10090 GN=Dcn PE=1 SV=1	2.88e+18	0	140.556	47	15	735	14	14	1	2881.91	735	15	1	>sp|P28654|PGS2_MOUSE Decorin OS=Mus musculus OX=10090 GN=Dcn PE=1 SV=1	0.4	1.05	0.05	-0.32	-0.07	0.05	-0.59	-0.47	-0.52	-0.24	-0.16	0.59	-0.4	-0.13	0.02	-0.14	-0.43	-0.41	-0.41	0	-0.1	-0.31	-0.14	-0.26	0.24	-0.02	0.32	-0.2	-0.03	-0.14	-0.45	-0.38	-0.4
P20801	Tnnc2	Troponin C, skeletal muscle OS=Mus musculus OX=10090 GN=Tnnc2 PE=1 SV=2	-4.96e+18	0	140.117	77	10	4231	10	10	1	14903.4	4231	10	0	>sp|P20801|TNNC2_MOUSE Troponin C, skeletal muscle OS=Mus musculus OX=10090 GN=Tnnc2 PE=1 SV=2	0.37	0.54	0.34	0.18	0.16	0.31	0.08	0.08	0.16	0.03	0.22	0.16	0.11	0.1	0.31	0.29	0.04	0.4	0.41	-0.25	-0.32	0.02	-0.05	0.25	0.11	0.32	-0.71	0.09	-0.08	-0.13	0.05	0.14	0.01
P27612	Plaa	Phospholipase A-2-activating protein OS=Mus musculus OX=10090 GN=Plaa PE=1 SV=4	-4.41e+18	0	139.955	41	26	261	17	26	1	873.07	261	26	0	>sp|P27612|PLAP_MOUSE Phospholipase A-2-activating protein OS=Mus musculus OX=10090 GN=Plaa PE=1 SV=4	0.02	0.01	-0.09	-0.01	-0.05	0.03	-0.04	0	-0.09	0.12	-0.04	-0.08	-0.13	-0.11	-0.13	-0.1	0.01	-0.17	0	-0.24	-0.06	-0.06	-0.08	-0.21	-0.17	0.02	0.02	-0.06	-0.2	-0.27	-0.13	-0.19	0.06
A0A0R4J0Z1	Pdia4	Isoform of P08003, Protein disulfide-isomerase A4 OS=Mus musculus OX=10090 GN=Pdia4 PE=1 SV=1	-4.26e+18	0	139.789	48	25	277	0	25	1	834.49	277	25	0	>tr|A0A0R4J0Z1|A0A0R4J0Z1_MOUSE Isoform of P08003, Protein disulfide-isomerase A4 OS=Mus musculus OX=10090 GN=Pdia4 PE=1 SV=1	-0.03	0.11	-0.21	0	-0.21	0.09	-0.11	-0.12	0.1	-0.09	-0.32	0.32	-0.18	-0.05	-0.03	0.11	0.07	-0.05	-0.14	0.44	-0.07	0.07	-0.09	0.44	-0.18	0.11	0.1	-0.36	-0.1	0.28	-0.15	0	-0.09
P62334	Psmc6	26S proteasome regulatory subunit 10B OS=Mus musculus OX=10090 GN=Psmc6 PE=1 SV=1	-2.01e+18	0	139.229	57	17	346	17	17	1	1217.51	346	17	0	>sp|P62334|PRS10_MOUSE 26S proteasome regulatory subunit 10B OS=Mus musculus OX=10090 GN=Psmc6 PE=1 SV=1	0.05	-0.04	0.12	0.07	-0.03	-0.1	0.11	0.05	-0.04	0.14	0.1	0.12	0.1	0.09	0.08	-0.02	0.1	0.16	0.12	0.05	0.12	-0.06	-0.03	0.05	0.06	0.03	0	0.02	-0.02	-0.09	0.1	0.03	0.17
Q8BL66	Eea1	Early endosome antigen 1 OS=Mus musculus OX=10090 GN=Eea1 PE=1 SV=2	-3.98e+18	0	139.16	25	28	137	27	28	1	451.22	137	28	0	>sp|Q8BL66|EEA1_MOUSE Early endosome antigen 1 OS=Mus musculus OX=10090 GN=Eea1 PE=1 SV=2	0.01	-0.05	0.06	0.05	-0.02	-0.44	0.04	-0.02	0.06	0	-0.12	-0.18	-0.15	-0.06	-0.02	0.01	0.03	-0.13	-0.15	-0.04	0.02	-0.23	0.08	-0.03	-0.11	-0.06	-0.06	-0.08	-0.06	0.08	-0.09	0.02	-0.09
A0A0R4J038	Kng1	Isoform of O08677, Kininogen-1 OS=Mus musculus OX=10090 GN=Kng1 PE=1 SV=1	-7.42e+18	0	138.744	39	20	304	0	18	1	1036.37	304	20	2	>tr|A0A0R4J038|A0A0R4J038_MOUSE Isoform of O08677, Kininogen-1 OS=Mus musculus OX=10090 GN=Kng1 PE=1 SV=1	-0.31	-0.14	-0.12	-0.17	-0.21	-0.2	-0.07	-0.2	0.05	-0.02	-0.16	-0.04	-0.36	-0.12	-0.12	0.03	-0.09	-0.22	-0.29	0.21	-0.27	0.07	0.32	-0.22	-0.32	-0.27	0.34	-0.22	-0.1	0.23	-0.14	0.01	-0.27
O88346	Tnnt1	Troponin T, slow skeletal muscle OS=Mus musculus OX=10090 GN=Tnnt1 PE=2 SV=3	1.11e+18	0	138.696	44	16	939	0	11	1	3504.77	939	16	2	>sp|O88346|TNNT1_MOUSE Troponin T, slow skeletal muscle OS=Mus musculus OX=10090 GN=Tnnt1 PE=2 SV=3	-1.62	-0.7	-0.88	-0.36	-0.03	-0.52	0.55	-0.15	-0.17	0.07	-0.17	-0.79	-0.48	0.02	0.78	-0.36	-0.55	-1.48	-1.2	-0.02	-0.19	0.26	0.93	-0.52	0.44	-0.39	0.11	0.01	-0.19	-0.44	-0.18	0.17	0.4
Q8C0C7	Farsa	Phenylalanine--tRNA ligase alpha subunit OS=Mus musculus OX=10090 GN=Farsa PE=1 SV=1	9.21e+18	0	138.692	38	15	241	2	15	1	905.46	241	15	0	>sp|Q8C0C7|SYFA_MOUSE Phenylalanine--tRNA ligase alpha subunit OS=Mus musculus OX=10090 GN=Farsa PE=1 SV=1	-0.23	-0.22	-0.04	-0.06	0.08	-0.06	-0.09	-0.11	-0.14	-0.03	-0.19	-0.12	0.15	-0.01	-0.07	0.05	0.07	0.14	0.03	0.06	0.12	-0.14	-0.03	-0.09	-0.1	-0.02	-0.12	0.01	-0.16	-0.13	-0.11	-0.13	-0.09
Q8VEE1	Lmcd1	LIM and cysteine-rich domains protein 1 OS=Mus musculus OX=10090 GN=Lmcd1 PE=1 SV=1	-6.34e+17	0	138.608	66	19	316	19	19	1	964.8	316	19	0	>sp|Q8VEE1|LMCD1_MOUSE LIM and cysteine-rich domains protein 1 OS=Mus musculus OX=10090 GN=Lmcd1 PE=1 SV=1	-0.36	-0.21	-0.05	0.19	0.36	0.1	0.32	0.16	0.34	0.46	0	-0.13	-0.03	0.14	0.5	0.04	-0.51	-0.46	-0.08	0.36	0.29	0.31	0.52	0	0.39	-0.32	0.88	0.22	0.1	-0.02	-0.05	0.01	0.36
E9Q5J9	Tpm3	Isoform of P21107, Tropomyosin alpha-3 chain OS=Mus musculus OX=10090 GN=Tpm3 PE=1 SV=1	4.22e+18	0	138.598	56	24	4343	0	0	1	10855.8	4343	24	3	>tr|E9Q5J9|E9Q5J9_MOUSE Isoform of P21107, Tropomyosin alpha-3 chain OS=Mus musculus OX=10090 GN=Tpm3 PE=1 SV=1	0.02	0.15	-0.24	-0.07	-0.22	NaN	-0.08	-0.15	-1.63	-0.21	-0.31	0.55	0.13	0.4	0.18	0.05	NaN	-0.33	-0.25	0.23	-0.38	-0.05	0.53	0.51	0.05	NaN	0.31	-0.01	-0.07	0.53	-0.21	0.13	-0.13
Q9EQH3	Vps35	Vacuolar protein sorting-associated protein 35 OS=Mus musculus OX=10090 GN=Vps35 PE=1 SV=1	-4.96e+18	0	138.388	35	20	253	20	20	1	891.82	253	20	0	>sp|Q9EQH3|VPS35_MOUSE Vacuolar protein sorting-associated protein 35 OS=Mus musculus OX=10090 GN=Vps35 PE=1 SV=1	-0.03	-0.07	-0.03	0.02	-0.11	0.01	-0.12	-0.1	-0.06	0.02	-0.06	0	-0.2	-0.23	-0.15	-0.03	-0.1	-0.03	-0.08	-0.17	-0.06	0.02	-0.06	-0.29	-0.08	0.03	-0.3	-0.13	-0.19	0	-0.06	-0.05	-0.06
Q3U3J1	Bckdha	Isoform of P50136, 2-oxoisovalerate dehydrogenase subunit alpha OS=Mus musculus OX=10090 GN=Bckdha PE=1 SV=1	-3.61e+18	0	137.847	49	15	235	1	15	1	967.79	235	15	0	>tr|Q3U3J1|Q3U3J1_MOUSE Isoform of P50136, 2-oxoisovalerate dehydrogenase subunit alpha OS=Mus musculus OX=10090 GN=Bckdha PE=1 SV=1	-0.29	-0.14	-0.3	-0.16	-0.03	-0.1	-0.04	0.13	0.27	0.11	0.13	0.05	0.03	0.21	0.54	0.09	-0.06	-0.29	-0.08	0.54	0.49	0.23	0.19	0.41	0.04	0.13	0.36	0.08	0.34	0.39	0.23	0.5	-0.15
Q9DCZ1	Gmpr	GMP reductase 1 OS=Mus musculus OX=10090 GN=Gmpr PE=1 SV=1	8.39e+18	0	137.097	62	16	263	3	16	1	844.7	263	16	0	>sp|Q9DCZ1|GMPR1_MOUSE GMP reductase 1 OS=Mus musculus OX=10090 GN=Gmpr PE=1 SV=1	-0.03	0.1	-0.21	-0.24	0.05	-0.15	0.26	-0.27	0.04	0.1	0.11	-0.01	0.04	-0.18	-0.14	0.18	0.29	0.11	0.08	-0.65	-0.61	-0.3	-0.21	-0.23	-0.02	-0.24	-0.63	-0.12	0.15	-0.01	0.3	0.27	-0.3
P67778	Phb	Prohibitin OS=Mus musculus OX=10090 GN=Phb PE=1 SV=1	-4.65e+18	0	136.726	75	15	470	5	15	1	2016.25	470	15	0	>sp|P67778|PHB_MOUSE Prohibitin OS=Mus musculus OX=10090 GN=Phb PE=1 SV=1	-0.08	-0.04	-0.09	0.04	0.13	0.02	0.08	0.09	0.14	0.15	-0.01	-0.05	0.13	0.13	0.4	0.19	0.09	-0.1	0.03	0.03	0.08	0.02	0	0.08	0.16	0.18	-0.04	0.14	0.13	0.16	0.08	0.11	0.06
Q8CJG0	Ago2	Protein argonaute-2 OS=Mus musculus OX=10090 GN=Ago2 PE=1 SV=3	8.45e+18	0	136.669	35	22	164	16	22	1	574.35	164	22	0	>sp|Q8CJG0|AGO2_MOUSE Protein argonaute-2 OS=Mus musculus OX=10090 GN=Ago2 PE=1 SV=3	0.08	-0.05	-0.06	0.03	0.09	-0.06	0	0	-0.01	0.14	-0.04	-0.07	-0.11	-0.15	0.02	-0.02	0.04	0.08	-0.05	-0.14	0.07	-0.03	0.02	-0.11	0.02	0.07	0.03	0.1	-0.03	-0.14	-0.06	-0.07	0.11
Q8R081	Hnrnpl	Heterogeneous nuclear ribonucleoprotein L OS=Mus musculus OX=10090 GN=Hnrnpl PE=1 SV=2	-2e+18	0	136.657	57	18	172	0	1	1	643.01	172	18	0	>sp|Q8R081|HNRPL_MOUSE Heterogeneous nuclear ribonucleoprotein L OS=Mus musculus OX=10090 GN=Hnrnpl PE=1 SV=2	NaN	-0.66	NaN	NaN	0.33	NaN	NaN	NaN	NaN	NaN	NaN	NaN	NaN	NaN	NaN	NaN	NaN	NaN	NaN	NaN	NaN	0.03	NaN	NaN	NaN	NaN	NaN	NaN	NaN	NaN	NaN	NaN	NaN
P26231	Ctnna1	Catenin alpha-1 OS=Mus musculus OX=10090 GN=Ctnna1 PE=1 SV=1	7.05e+18	0	136.502	33	19	91	16	19	1	338.04	91	19	0	>sp|P26231|CTNA1_MOUSE Catenin alpha-1 OS=Mus musculus OX=10090 GN=Ctnna1 PE=1 SV=1	-0.27	-0.21	-0.11	-0.09	-0.1	0.31	0.03	-0.26	0.13	-0.03	-0.18	0.05	-0.12	-0.37	-0.19	-0.06	-0.3	-0.05	-0.11	0.25	-0.1	-0.05	-0.23	-0.12	-0.03	-0.02	-0.25	0.06	0	0.09	-0.02	-0.13	-0.05
Q61102	Abcb7	ATP-binding cassette sub-family B member 7, mitochondrial OS=Mus musculus OX=10090 GN=Abcb7 PE=1 SV=3	7.09e+18	0	136.254	36	17	205	17	17	1	702.13	205	17	0	>sp|Q61102|ABCB7_MOUSE ATP-binding cassette sub-family B member 7, mitochondrial OS=Mus musculus OX=10090 GN=Abcb7 PE=1 SV=3	-0.14	-0.26	0.05	0.04	0.03	-0.15	0.03	0.11	0.09	0.13	0.06	-0.19	-0.08	-0.02	0.06	-0.06	0.09	-0.12	0.01	0.06	0.22	0.2	0.21	0.05	0.07	-0.07	0.07	0.14	0.13	-0.07	0.06	-0.02	0.25
Q9D8W5	Psmd12	26S proteasome non-ATPase regulatory subunit 12 OS=Mus musculus OX=10090 GN=Psmd12 PE=1 SV=4	-6.02e+18	0	136.117	46	21	286	0	21	1	979.92	286	21	0	>sp|Q9D8W5|PSD12_MOUSE 26S proteasome non-ATPase regulatory subunit 12 OS=Mus musculus OX=10090 GN=Psmd12 PE=1 SV=4	0.08	0.29	0.1	0.04	0	0.01	0.12	0.12	-0.01	0.17	0.1	-0.04	0.01	-0.25	-0.23	0.07	0.03	0.13	0.11	-0.11	0.11	0.03	-0.16	-0.08	0	0.15	-0.09	-0.01	-0.06	-0.19	0.06	-0.06	0.11
Q7TMK9-2	Syncrip	Isoform of Q7TMK9, Isoform 2 of Heterogeneous nuclear ribonucleoprotein Q OS=Mus musculus OX=10090 GN=Syncrip	7.74e+18	0	135.948	46	20	325	0	15	1	1115.89	325	20	5	>sp|Q7TMK9-2|HNRPQ_MOUSE Isoform of Q7TMK9, Isoform 2 of Heterogeneous nuclear ribonucleoprotein Q OS=Mus musculus OX=10090 GN=Syncrip	0.21	0.11	-0.02	0	-0.05	0.26	0.01	0.01	0.02	0.04	0	0.05	0.01	-0.02	-0.09	0.16	0.07	0.02	0.01	0.04	0.01	-0.01	0.07	0.21	0.03	0.03	-0.23	-0.06	-0.09	0.07	-0.03	0	-0.01
Q6P4T2	Snrnp200	U5 small nuclear ribonucleoprotein 200 kDa helicase OS=Mus musculus OX=10090 GN=Snrnp200 PE=1 SV=1	-6.88e+18	0	135.918	18	27	133	27	27	1	483.35	133	27	0	>sp|Q6P4T2|U520_MOUSE U5 small nuclear ribonucleoprotein 200 kDa helicase OS=Mus musculus OX=10090 GN=Snrnp200 PE=1 SV=1	-0.06	0.2	0.03	0.02	0.12	0.04	-0.01	-0.05	-0.03	-0.24	-0.06	0.24	0.06	0.11	0.1	-0.09	-0.02	-0.04	-0.17	0.06	0.14	-0.28	0.05	0.27	0.14	-0.19	0.09	0.08	-0.06	0.22	-0.04	0.08	-0.03
Q9WUZ7	Sh3bgr	SH3 domain-binding glutamic acid-rich protein OS=Mus musculus OX=10090 GN=Sh3bgr PE=1 SV=1	-4.34e+18	0	135.866	73	13	300	0	13	1	1155.13	300	13	0	>sp|Q9WUZ7|SH3BG_MOUSE SH3 domain-binding glutamic acid-rich protein OS=Mus musculus OX=10090 GN=Sh3bgr PE=1 SV=1	0.26	0.3	0.13	0.11	0.01	0.17	-0.04	0.05	0.05	-0.01	0.19	0.03	0.03	-0.19	0.03	0.18	-0.01	0.32	0.17	-0.38	-0.2	-0.08	-0.25	0.07	0.02	0.12	-0.62	-0.01	-0.14	-0.18	-0.01	-0.01	-0.14
Q9DBG5	Plin3	Perilipin-3 OS=Mus musculus OX=10090 GN=Plin3 PE=1 SV=1	-6.99e+18	0	135.75	57	15	202	15	15	1	845.27	202	15	0	>sp|Q9DBG5|PLIN3_MOUSE Perilipin-3 OS=Mus musculus OX=10090 GN=Plin3 PE=1 SV=1	-0.07	0.03	-0.05	-0.03	0.33	0.1	-0.05	0.25	0.02	-0.03	0.11	0.09	0.17	0	0.11	0.05	-0.01	0.02	0.05	-0.27	-0.32	0.24	0.09	-0.1	0.19	0.04	-0.15	-0.03	0.15	0.24	0.23	0.29	-0.13
Q8BRK8	Prkaa2	5'-AMP-activated protein kinase catalytic subunit alpha-2 OS=Mus musculus OX=10090 GN=Prkaa2 PE=1 SV=3	9.16e+18	0	135.621	42	19	280	15	15	1	945.77	280	19	6	>sp|Q8BRK8|AAPK2_MOUSE 5'-AMP-activated protein kinase catalytic subunit alpha-2 OS=Mus musculus OX=10090 GN=Prkaa2 PE=1 SV=3	0.34	-0.02	0.03	-0.03	0.05	-0.02	-0.1	0.05	-0.16	-0.04	0.12	-0.08	-0.27	-0.27	-0.26	-0.16	-0.02	0.29	0.13	-0.43	-0.04	0.02	-0.13	-0.16	0.04	0.15	-0.15	0	-0.16	-0.21	0.02	-0.06	0.17
Q99MQ4	Aspn	Asporin OS=Mus musculus OX=10090 GN=Aspn PE=1 SV=1	7.29e+17	0	135.262	50	15	396	15	15	1	1486.88	396	15	0	>sp|Q99MQ4|ASPN_MOUSE Asporin OS=Mus musculus OX=10090 GN=Aspn PE=1 SV=1	-0.16	0.16	0.17	-0.08	0.22	0.2	-0.4	-0.15	-0.03	0.1	-0.24	0.54	-0.11	0.19	0.36	-0.18	-0.21	-0.04	-0.55	0.5	-0.15	0.44	0.19	-0.05	0.04	0.12	0.39	0.08	-0.04	0.01	-0.17	-0.12	-0.23
Q9D172	Gatd3a	Glutamine amidotransferase-like class 1 domain-containing protein 3A, mitochondrial OS=Mus musculus OX=10090 GN=Gatd3a PE=1 SV=1	-7.55e+18	0	135.138	56	11	411	3	11	1	1529.56	411	11	0	>sp|Q9D172|GAL3A_MOUSE Glutamine amidotransferase-like class 1 domain-containing protein 3A, mitochondrial OS=Mus musculus OX=10090 GN=Gatd3a PE=1 SV=1	-0.22	-0.07	-0.04	0.02	0.16	0.03	0.01	0.1	0.22	0.11	0.13	-0.15	0.13	0.18	0.45	0.26	0.16	-0.04	0.11	-0.08	0.02	-0.26	-0.25	0.06	0.19	0.09	-0.03	0.11	0.05	0.05	0.08	0.15	0.07
P62702	Rps4x	40S ribosomal protein S4, X isoform OS=Mus musculus OX=10090 GN=Rps4x PE=1 SV=2	3.11e+18	0	135.068	51	14	346	5	14	1	1070.83	346	14	0	>sp|P62702|RS4X_MOUSE 40S ribosomal protein S4, X isoform OS=Mus musculus OX=10090 GN=Rps4x PE=1 SV=2	0.04	0.06	0.01	0.03	-0.07	0.04	-0.05	-0.12	-0.06	-0.04	-0.04	-0.02	0.06	-0.05	-0.06	0.02	0.02	0.08	-0.02	0.13	-0.08	-0.05	-0.06	0.21	0.01	0.04	0.36	-0.1	-0.09	0.07	-0.03	-0.02	0.01
J3QMG3	Vdac3	Isoform of Q60931, Voltage-dependent anion-selective channel protein 3 OS=Mus musculus OX=10090 GN=Vdac3 PE=1 SV=1	-7.76e+18	0	134.96	55	13	967	0	12	1	3177.21	967	13	0	>tr|J3QMG3|J3QMG3_MOUSE Isoform of Q60931, Voltage-dependent anion-selective channel protein 3 OS=Mus musculus OX=10090 GN=Vdac3 PE=1 SV=1	-0.1	0.02	0.15	0.15	0.16	0	0.28	0.15	0.34	0.37	0.14	-0.1	0.1	0.09	0.13	0.03	0.07	0.02	0.16	-0.12	0.01	0.11	0.02	-0.03	0.11	0.28	0.06	0.2	0.19	0.04	0.24	0.17	0.06
Q8BJS4	Sun2	SUN domain-containing protein 2 OS=Mus musculus OX=10090 GN=Sun2 PE=1 SV=3	-3.43e+18	0	134.834	44	23	191	0	23	1	638.45	191	23	0	>sp|Q8BJS4|SUN2_MOUSE SUN domain-containing protein 2 OS=Mus musculus OX=10090 GN=Sun2 PE=1 SV=3	0.42	0.2	-0.11	-0.01	0.15	0.01	0.07	0.18	-0.12	0.18	0.14	0.09	0.23	0.04	0.18	0.01	0.02	-0.18	-0.1	0.15	-0.07	-0.26	-0.22	0.44	0.2	0.26	-0.12	0.21	0.3	-0.1	0.13	-0.32	-0.02
E9PWZ3	Rpl3l	Ribosomal protein L3-like OS=Mus musculus OX=10090 GN=Rpl3l PE=1 SV=1	-5.44e+18	0	134.69	48	17	430	3	16	1	1265.43	430	17	1	>tr|E9PWZ3|E9PWZ3_MOUSE Ribosomal protein L3-like OS=Mus musculus OX=10090 GN=Rpl3l PE=1 SV=1	0.14	0.02	0.02	-0.11	-0.04	-0.09	-0.01	-0.1	-0.01	0.06	-0.01	-0.19	-0.01	-0.25	-0.23	-0.02	0.2	0.1	-0.01	-0.08	0.11	-0.1	-0.04	-0.1	0.09	0.07	0.05	-0.14	-0.05	-0.21	0.05	-0.09	0.07
G5E829	Atp2b1	Plasma membrane calcium-transporting ATPase 1 OS=Mus musculus OX=10090 GN=Atp2b1 PE=1 SV=1	5.91e+18	0	134.672	27	25	176	2	15	1	689.92	176	25	10	>sp|G5E829|AT2B1_MOUSE Plasma membrane calcium-transporting ATPase 1 OS=Mus musculus OX=10090 GN=Atp2b1 PE=1 SV=1	0.17	0.12	0.05	0.05	-0.01	0.01	0.06	-0.17	0.12	-0.05	-0.02	0.06	-0.08	-0.17	0.01	-0.06	-0.01	0.06	-0.06	-0.07	0.05	-0.11	0.16	0.19	0.12	0.12	-0.02	-0.03	-0.02	-0.1	-0.02	-0.09	0.03
Q8BMF3	Me3	NADP-dependent malic enzyme, mitochondrial OS=Mus musculus OX=10090 GN=Me3 PE=1 SV=2	-6.92e+18	0	134.557	44	20	318	18	20	1	1194.28	318	20	0	>sp|Q8BMF3|MAON_MOUSE NADP-dependent malic enzyme, mitochondrial OS=Mus musculus OX=10090 GN=Me3 PE=1 SV=2	0.02	-0.01	-0.2	-0.25	0.08	-0.21	-0.37	0.14	-0.4	-0.41	-0.23	-0.45	-0.35	-0.4	-0.42	-0.24	-0.2	0.12	0.16	-0.08	0.07	0.1	0.15	-0.37	-0.15	-0.01	0.12	0.1	0.07	-0.1	0.06	-0.04	0.04
Q923T9-3	Camk2g	Isoform of Q923T9, Isoform 3 of Calcium/calmodulin-dependent protein kinase type II subunit gamma OS=Mus musculus OX=10090 GN=Camk2g	4.74e+18	0	134.556	40	15	288	0	1	1	1075.97	288	15	0	>sp|Q923T9-3|KCC2G_MOUSE Isoform of Q923T9, Isoform 3 of Calcium/calmodulin-dependent protein kinase type II subunit gamma OS=Mus musculus OX=10090 GN=Camk2g	0.14	0.07	0.06	-0.05	-0.17	NaN	0.08	0.17	0.07	NaN	0.04	-0.25	-0.11	-0.26	-0.07	-0.26	-0.38	0.23	0.08	-0.38	-0.04	-0.04	-0.12	-0.1	-0.19	-0.09	0	-0.05	-0.31	-0.18	-0.19	-0.16	NaN
Q8VCT4	Ces1d	Carboxylesterase 1D OS=Mus musculus OX=10090 GN=Ces1d PE=1 SV=1	3.26e+18	0	134.382	45	20	346	17	17	1	1214.44	346	20	3	>sp|Q8VCT4|CES1D_MOUSE Carboxylesterase 1D OS=Mus musculus OX=10090 GN=Ces1d PE=1 SV=1	-0.84	0.03	-0.2	0.39	0.1	0.77	0.18	0.71	1.37	0.71	0.01	0.51	1.39	1.31	1.74	1.62	0.3	-0.48	-0.67	1.37	0.36	0.94	0.74	1.16	-0.18	-0.22	0.15	-0.14	0.24	0.8	0.18	1.03	-0.19
Q9D8E6	Rpl4	60S ribosomal protein L4 OS=Mus musculus OX=10090 GN=Rpl4 PE=1 SV=3	-6.08e+18	0	134.311	44	18	389	18	18	1	1418.61	389	18	0	>sp|Q9D8E6|RL4_MOUSE 60S ribosomal protein L4 OS=Mus musculus OX=10090 GN=Rpl4 PE=1 SV=3	0.15	0.15	-0.05	-0.01	-0.09	-0.04	-0.02	-0.08	-0.01	0	-0.04	-0.01	0.08	-0.04	-0.01	0.13	0.09	0.08	-0.05	0.17	0.09	-0.01	-0.04	0.18	0.12	0.1	0.13	-0.11	-0.01	0.08	0.03	0.01	0
Q3TMH2	Scrn3	Secernin-3 OS=Mus musculus OX=10090 GN=Scrn3 PE=1 SV=1	-3.63e+18	0	134.258	59	19	296	13	19	1	1168.13	296	19	0	>sp|Q3TMH2|SCRN3_MOUSE Secernin-3 OS=Mus musculus OX=10090 GN=Scrn3 PE=1 SV=1	0.14	0.32	0.12	0.17	0.01	0.01	-0.05	0.24	0.15	0.19	0.07	-0.09	0	0.08	0.04	0.16	-0.01	0.25	0.19	-0.09	-0.03	0.1	-0.01	0.08	-0.03	-0.04	-0.04	0.12	0.11	-0.03	0.15	0.1	0.08
P45376	Akr1b1	Aldose reductase OS=Mus musculus OX=10090 GN=Akr1b1 PE=1 SV=3	5.61e+18	0	134.06	59	17	850	8	16	1	2629.05	850	17	1	>sp|P45376|ALDR_MOUSE Aldose reductase OS=Mus musculus OX=10090 GN=Akr1b1 PE=1 SV=3	0.16	0.32	0.06	0.05	0.07	0.01	0.11	0.2	0.14	0.18	0.17	0.03	0.14	0.29	0.1	0.14	0.2	0.13	0.05	-0.19	0.02	0.03	0.03	-0.01	0.06	-0.1	-0.28	0.02	-0.07	-0.09	0.05	-0.01	-0.08
Q921H8	Acaa1a	3-ketoacyl-CoA thiolase A, peroxisomal OS=Mus musculus OX=10090 GN=Acaa1a PE=1 SV=1	4.25e+18	0	134.014	52	14	166	0	14	1	679.12	166	14	0	>sp|Q921H8|THIKA_MOUSE 3-ketoacyl-CoA thiolase A, peroxisomal OS=Mus musculus OX=10090 GN=Acaa1a PE=1 SV=1	-0.25	-0.05	-0.23	-0.08	-0.01	0.22	-0.36	-0.04	0.09	-0.37	-0.34	-0.23	0.44	0.37	0.8	0.49	0.2	-0.23	-0.04	0.7	0.29	-0.19	-0.41	0.55	0.23	0.29	0.1	0.06	0.02	0.29	-0.12	0.27	-0.1
P07356	Anxa2	Annexin A2 OS=Mus musculus OX=10090 GN=Anxa2 PE=1 SV=2	4.53e+18	0	133.885	61	20	542	0	20	1	1923.44	542	20	0	>sp|P07356|ANXA2_MOUSE Annexin A2 OS=Mus musculus OX=10090 GN=Anxa2 PE=1 SV=2	-0.01	0.35	-0.09	0	-0.15	0.35	-0.21	-0.3	0.08	-0.2	-0.12	0.45	-0.13	0.27	0.19	0.15	-0.03	-0.14	-0.19	0.51	0.02	-0.02	-0.01	-0.07	0.01	-0.08	0.23	0.02	-0.03	0.15	-0.1	-0.05	-0.39
Q9DBF1	Aldh7a1	Alpha-aminoadipic semialdehyde dehydrogenase OS=Mus musculus OX=10090 GN=Aldh7a1 PE=1 SV=4	3.96e+18	0	133.666	46	19	201	0	19	1	695.17	201	19	0	>sp|Q9DBF1|AL7A1_MOUSE Alpha-aminoadipic semialdehyde dehydrogenase OS=Mus musculus OX=10090 GN=Aldh7a1 PE=1 SV=4	-0.08	-0.29	0.05	0.08	0.08	-0.07	0.35	0.46	0.62	0.57	0.18	0.12	-0.02	0.03	0.06	-0.18	-0.02	0.1	0.13	-0.12	0.28	-0.12	-0.16	0.44	0.38	-0.01	-0.16	0.25	0.05	0.05	0.23	0.14	0.35
Q3UM45	Ppp1r7	Protein phosphatase 1 regulatory subunit 7 OS=Mus musculus OX=10090 GN=Ppp1r7 PE=1 SV=2	4.56e+18	0	133.435	60	17	224	11	17	1	890.94	224	17	0	>sp|Q3UM45|PP1R7_MOUSE Protein phosphatase 1 regulatory subunit 7 OS=Mus musculus OX=10090 GN=Ppp1r7 PE=1 SV=2	0.15	0.08	0.03	0.03	0.08	0.2	0.04	0.17	0.03	0.14	0.18	-0.02	-0.07	0.14	-0.02	0.05	0.04	0.06	-0.01	-0.1	0.04	-0.01	-0.01	-0.08	0.02	0.11	0.11	0.07	0.06	-0.02	0.08	0.06	-0.05
A0A0R4J0Q5	Lmnb2	Isoform of P21619, Lamin-B2 OS=Mus musculus OX=10090 GN=Lmnb2 PE=1 SV=1	6.36e+18	0	133.233	42	24	339	0	21	1	1124.15	339	24	0	>tr|A0A0R4J0Q5|A0A0R4J0Q5_MOUSE Isoform of P21619, Lamin-B2 OS=Mus musculus OX=10090 GN=Lmnb2 PE=1 SV=1	0.09	0.22	-0.07	-0.06	0.04	-0.08	0.19	-0.21	0.08	0.09	0.17	0.19	0.06	0.08	0.18	-0.09	0.01	0.06	0.04	-0.12	-0.35	-0.16	-0.16	0.4	-0.03	-0.06	0.09	0.04	0.04	0.07	-0.06	-0.2	0
Q61702	Itih1	Inter-alpha-trypsin inhibitor heavy chain H1 OS=Mus musculus OX=10090 GN=Itih1 PE=1 SV=2	2.1e+18	0	133.033	25	15	151	1	15	1	603.02	151	15	0	>sp|Q61702|ITIH1_MOUSE Inter-alpha-trypsin inhibitor heavy chain H1 OS=Mus musculus OX=10090 GN=Itih1 PE=1 SV=2	0	0.12	0.08	-0.32	-0.24	-0.28	-0.36	-0.17	-0.21	-0.13	-0.08	0.19	-0.46	-0.35	-0.37	-0.12	-0.16	-0.16	-0.3	0.4	-0.07	-0.13	-0.01	-0.24	-0.14	-0.09	-0.29	-0.03	0.09	0.1	-0.17	-0.11	-0.16
P10107	Anxa1	Annexin A1 OS=Mus musculus OX=10090 GN=Anxa1 PE=1 SV=2	-2.18e+18	0	132.731	65	20	353	18	19	1	1134.15	353	20	0	>sp|P10107|ANXA1_MOUSE Annexin A1 OS=Mus musculus OX=10090 GN=Anxa1 PE=1 SV=2	-0.11	0.08	-0.02	0.01	-0.19	0.53	-0.34	-0.16	-0.03	-0.06	-0.38	0.64	-0.15	0.34	0.05	-0.01	-0.08	-0.04	-0.41	0.84	-0.14	0.24	0.29	-0.04	-0.31	-0.17	0.58	0.12	0.05	0.29	0.09	-0.02	-0.26
P45952	Acadm	Medium-chain specific acyl-CoA dehydrogenase, mitochondrial OS=Mus musculus OX=10090 GN=Acadm PE=1 SV=1	-9.2e+18	0	132.682	40	17	599	15	17	1	2233.34	599	17	0	>sp|P45952|ACADM_MOUSE Medium-chain specific acyl-CoA dehydrogenase, mitochondrial OS=Mus musculus OX=10090 GN=Acadm PE=1 SV=1	-0.62	-0.45	-0.21	-0.05	0.04	-0.13	0.05	0.17	0.43	0.06	-0.14	-0.34	0.29	0.37	0.89	0.3	-0.15	-0.38	-0.08	0.4	0.51	-0.02	-0.07	0.13	0.1	0.05	-0.09	0.08	-0.08	0.14	-0.19	0.2	-0.02
Q8R016	Blmh	Bleomycin hydrolase OS=Mus musculus OX=10090 GN=Blmh PE=1 SV=1	-2.28e+18	0	132.49	42	14	262	4	14	1	879.42	262	14	0	>sp|Q8R016|BLMH_MOUSE Bleomycin hydrolase OS=Mus musculus OX=10090 GN=Blmh PE=1 SV=1	-0.08	-0.05	-0.08	-0.15	0.05	0.23	0.21	0.12	-0.04	-0.01	0.05	0.16	-0.16	-0.43	-0.44	-0.19	-0.2	0.32	0.3	-0.2	-0.16	-0.14	-0.2	-0.06	-0.02	0.12	-0.26	-0.01	0	-0.2	0.07	-0.01	0.78
P97355	Sms	Spermine synthase OS=Mus musculus OX=10090 GN=Sms PE=1 SV=1	6.07e+18	0	132.017	76	19	287	5	19	1	1090.32	287	19	0	>sp|P97355|SPSY_MOUSE Spermine synthase OS=Mus musculus OX=10090 GN=Sms PE=1 SV=1	-0.06	-0.19	0.06	-0.09	-0.37	-0.17	-0.22	-0.36	-0.32	-0.03	-0.28	-0.31	-0.32	-0.46	-0.37	-0.35	-0.14	-0.24	-0.42	-0.5	-0.08	-0.18	-0.34	-0.45	-0.33	-0.17	-0.61	-0.45	-0.53	-0.56	-0.4	-0.55	-0.12
P80317	Cct6a	T-complex protein 1 subunit zeta OS=Mus musculus OX=10090 GN=Cct6a PE=1 SV=3	4.65e+18	0	131.987	44	21	309	16	21	1	1060.83	309	21	0	>sp|P80317|TCPZ_MOUSE T-complex protein 1 subunit zeta OS=Mus musculus OX=10090 GN=Cct6a PE=1 SV=3	-0.07	-0.16	0.07	0.1	-0.05	-0.04	0.18	-0.08	0.11	0.21	0.06	0.18	0.02	0.04	-0.04	-0.02	0.08	0.21	0.05	0.01	0.05	0.02	0.18	0.17	-0.06	-0.04	0.19	-0.12	0.02	0.18	0.15	0.09	0.12
Q9CPV4	Glod4	Glyoxalase domain-containing protein 4 OS=Mus musculus OX=10090 GN=Glod4 PE=1 SV=1	-7.15e+17	0	131.935	79	21	349	0	21	1	1159.71	349	21	0	>sp|Q9CPV4|GLOD4_MOUSE Glyoxalase domain-containing protein 4 OS=Mus musculus OX=10090 GN=Glod4 PE=1 SV=1	0.15	0.17	-0.41	-0.38	-0.43	-0.2	0.12	0.37	0.13	0.16	0.13	0.14	-0.28	-0.25	-0.47	0.13	0	0.28	0.3	-0.03	-0.01	0.01	0.01	0.11	-0.1	-0.34	-0.65	-0.01	-0.09	0	0.08	0.09	-0.28
Q8CE04	Cast	Isoform of P51125, Calpastatin OS=Mus musculus OX=10090 GN=Cast PE=1 SV=1	-8.2e+18	0	131.283	34	15	199	0	1	1	780.94	199	15	0	>tr|Q8CE04|Q8CE04_MOUSE Isoform of P51125, Calpastatin OS=Mus musculus OX=10090 GN=Cast PE=1 SV=1	NaN	NaN	NaN	NaN	NaN	NaN	NaN	NaN	0.07	NaN	NaN	NaN	NaN	NaN	NaN	NaN	NaN	NaN	NaN	NaN	NaN	NaN	NaN	NaN	NaN	NaN	NaN	NaN	NaN	NaN	NaN	NaN	NaN
Q80WJ7	Mtdh	Protein LYRIC OS=Mus musculus OX=10090 GN=Mtdh PE=1 SV=1	2.2e+18	0	130.571	43	21	150	1	21	1	537.9	150	21	0	>sp|Q80WJ7|LYRIC_MOUSE Protein LYRIC OS=Mus musculus OX=10090 GN=Mtdh PE=1 SV=1	0.1	0.14	0.08	0.01	-0.17	0.03	-0.32	-0.02	-0.27	-0.02	0	-0.06	-0.07	-0.13	-0.12	-0.24	-0.19	0.23	0.02	-0.13	-0.03	-0.09	-0.2	0.03	-0.04	0.07	-0.21	-0.12	-0.12	-0.1	-0.09	-0.11	-0.11
A0A0R4J1E2	Eef1d	Isoform of P57776, Elongation factor 1-delta OS=Mus musculus OX=10090 GN=Eef1d PE=1 SV=1	-2.21e+18	0	130.549	27	17	350	0	1	1	1316.82	350	17	18	>tr|A0A0R4J1E2|A0A0R4J1E2_MOUSE Isoform of P57776, Elongation factor 1-delta OS=Mus musculus OX=10090 GN=Eef1d PE=1 SV=1	0.02	-0.04	0.06	-0.02	-0.07	-0.11	0.13	0.03	-0.11	0.08	-0.11	-0.02	-0.03	-0.17	-0.22	0.14	0.06	0.14	0.09	0.01	0	-0.09	-0.06	-0.05	-0.05	0.1	-0.05	-0.04	0.02	0.08	0.14	0.06	0.07
Q9CQQ7	Atp5pb	ATP synthase F(0) complex subunit B1, mitochondrial OS=Mus musculus OX=10090 GN=Atp5pb PE=1 SV=1	-6.89e+18	0	130.331	44	14	615	7	14	1	1536.47	615	14	0	>sp|Q9CQQ7|AT5F1_MOUSE ATP synthase F(0) complex subunit B1, mitochondrial OS=Mus musculus OX=10090 GN=Atp5pb PE=1 SV=1	-0.53	-0.47	0.01	0.01	-0.18	-0.31	0.03	0.13	0.11	-0.03	0.09	-0.18	-0.06	-0.09	0.23	-0.33	-0.41	-0.15	0.13	-0.1	0.12	0.03	0	0.06	0.12	0.2	-0.06	0.16	-0.3	-0.31	-0.41	-0.4	0.06
A0A0R4J0I9	Lrp1	Isoform of Q91ZX7, Low density lipoprotein receptor-related protein 1 OS=Mus musculus OX=10090 GN=Lrp1 PE=1 SV=1	4.17e+18	0	130.089	8	26	91	0	26	1	290.17	91	26	0	>tr|A0A0R4J0I9|A0A0R4J0I9_MOUSE Isoform of Q91ZX7, Low density lipoprotein receptor-related protein 1 OS=Mus musculus OX=10090 GN=Lrp1 PE=1 SV=1	0.01	0.1	-0.07	-0.07	-0.17	0.13	-0.08	-0.18	-0.25	-0.09	-0.29	0.18	-0.03	-0.11	-0.06	-0.06	-0.02	-0.17	-0.4	0.1	0.06	-0.09	0.05	-0.19	-0.02	-0.1	0.06	-0.17	-0.07	-0.01	-0.16	-0.01	-0.08
O08759	Ube3a	Ubiquitin-protein ligase E3A OS=Mus musculus OX=10090 GN=Ube3a PE=1 SV=2	6.18e+17	0	129.869	34	25	124	0	25	1	395.27	124	25	0	>sp|O08759|UBE3A_MOUSE Ubiquitin-protein ligase E3A OS=Mus musculus OX=10090 GN=Ube3a PE=1 SV=2	0.15	-0.01	-0.01	-0.03	0.04	0.13	-0.06	0.03	-0.07	-0.02	-0.05	-0.1	-0.11	-0.1	-0.23	-0.17	-0.03	0.17	0.1	-0.15	0.13	0.05	-0.05	-0.19	-0.06	0.04	-0.13	0.01	-0.1	-0.15	-0.06	-0.11	0.02
D3YU22	Limch1	Isoform of Q3UH68, LIM and calponin homology domains-containing protein 1 OS=Mus musculus OX=10090 GN=Limch1 PE=1 SV=1	8.93e+18	0	129.796	26	21	142	0	21	1	462.58	142	21	0	>tr|D3YU22|D3YU22_MOUSE Isoform of Q3UH68, LIM and calponin homology domains-containing protein 1 OS=Mus musculus OX=10090 GN=Limch1 PE=1 SV=1	0.23	0	0.16	0.07	0.04	-0.21	0.14	0.11	0.1	0.21	-0.02	-0.07	-0.09	-0.11	0.06	0	-0.03	0.08	0.12	0.1	0.11	0.05	-0.1	0.08	0.13	0.13	-0.07	0.11	0.06	-0.03	0.06	-0.06	0.04
P60670	Nploc4	Nuclear protein localization protein 4 homolog OS=Mus musculus OX=10090 GN=Nploc4 PE=1 SV=3	4.7e+18	0	129.321	37	18	200	1	18	1	769.69	200	18	0	>sp|P60670|NPL4_MOUSE Nuclear protein localization protein 4 homolog OS=Mus musculus OX=10090 GN=Nploc4 PE=1 SV=3	0.12	0.09	0.21	0.03	-0.04	0.37	0.07	0.01	0.11	0.22	0.15	0.06	0.06	-0.12	-0.02	-0.13	0.09	0.02	0.07	-0.08	-0.03	-0.08	-0.19	-0.1	0.04	0.12	-0.19	-0.02	-0.1	-0.24	-0.11	-0.13	0.13
P18242	Ctsd	Cathepsin D OS=Mus musculus OX=10090 GN=Ctsd PE=1 SV=1	5.26e+18	0	129.125	46	13	226	0	13	1	791.09	226	13	0	>sp|P18242|CATD_MOUSE Cathepsin D OS=Mus musculus OX=10090 GN=Ctsd PE=1 SV=1	-0.08	0.39	0.07	0.04	-0.04	0.22	-0.11	0.17	-0.04	-0.19	0.1	0.18	0.28	0.39	0.49	0.1	0.16	-0.14	0.07	0.03	-0.09	-0.21	-0.21	-0.06	0.18	0.17	0.11	0.07	-0.14	0.29	-0.03	0.31	-0.02
B7ZNL2	Nap1l4	Isoform of Q78ZA7, Nap1l4 protein OS=Mus musculus OX=10090 GN=Nap1l4 PE=1 SV=1	-2.06e+18	0	129.082	54	12	263	0	11	1	1231.72	263	12	1	>tr|B7ZNL2|B7ZNL2_MOUSE Isoform of Q78ZA7, Nap1l4 protein OS=Mus musculus OX=10090 GN=Nap1l4 PE=1 SV=1	0.06	0.16	0.02	-0.04	-0.02	0.08	0.13	0.05	0.07	0.06	0.04	-0.01	0.06	-0.09	0.05	0.05	-0.06	0.19	0.15	-0.06	-0.08	-0.16	-0.23	0.03	0.02	0.18	-0.14	-0.08	0.02	-0.06	0.07	0.05	-0.12
H3BKH6	Esd	Isoform of Q9R0P3, S-formylglutathione hydrolase OS=Mus musculus OX=10090 GN=Esd PE=1 SV=1	2.23e+18	0	129.053	68	12	347	0	12	1	1482.63	347	12	0	>tr|H3BKH6|H3BKH6_MOUSE Isoform of Q9R0P3, S-formylglutathione hydrolase OS=Mus musculus OX=10090 GN=Esd PE=1 SV=1	0.37	0.55	0.22	0.31	0.49	0.33	0.35	-0.03	0.04	0.3	0.25	0.32	0.15	0.04	0.36	0.21	0.13	0.48	0.51	0.19	0.2	-0.21	-0.12	0.38	0.28	0.23	-0.04	0.3	0.32	0.2	0.37	0.19	0.2
Q9D8N0	Eef1g	Elongation factor 1-gamma OS=Mus musculus OX=10090 GN=Eef1g PE=1 SV=3	-6.33e+18	0	129.049	66	21	482	21	21	1	1663.6	482	21	0	>sp|Q9D8N0|EF1G_MOUSE Elongation factor 1-gamma OS=Mus musculus OX=10090 GN=Eef1g PE=1 SV=3	0.02	-0.04	-0.14	-0.19	-0.12	-0.25	0	0.06	-0.2	0.03	-0.09	-0.25	-0.26	-0.43	-0.58	-0.11	0.03	0.08	0.02	-0.28	0.09	-0.16	-0.18	-0.34	-0.07	0.14	0.25	-0.04	-0.13	-0.14	0	-0.07	0.07
Q8CHS7	Dhrs7c	Dehydrogenase/reductase SDR family member 7C OS=Mus musculus OX=10090 GN=Dhrs7c PE=1 SV=3	3.08e+18	0	128.859	59	15	473	15	15	1	1608.12	473	15	0	>sp|Q8CHS7|DRS7C_MOUSE Dehydrogenase/reductase SDR family member 7C OS=Mus musculus OX=10090 GN=Dhrs7c PE=1 SV=3	0.18	0.18	0.03	-0.01	-0.01	-0.04	-0.07	0.34	-0.2	0.03	0.13	-0.18	-0.13	-0.34	-0.32	-0.11	0.09	0.23	0.08	-0.24	0.04	0.06	-0.12	-0.16	-0.07	0.15	-0.4	0.17	0.03	-0.16	0.17	0.06	-0.03
Q9DCW4	Etfb	Electron transfer flavoprotein subunit beta OS=Mus musculus OX=10090 GN=Etfb PE=1 SV=3	8.9e+18	0	128.84	71	15	494	0	15	1	1856.89	494	15	0	>sp|Q9DCW4|ETFB_MOUSE Electron transfer flavoprotein subunit beta OS=Mus musculus OX=10090 GN=Etfb PE=1 SV=3	-0.53	-0.29	-0.33	-0.18	0.08	-0.21	0.07	0.2	0.45	0.12	-0.02	-0.24	0.13	0.3	0.5	0.03	0.1	-0.38	-0.02	0.18	0.33	0.1	0.11	0.06	0.22	-0.16	0.25	0.16	-0.02	0.07	-0.07	0.21	0.05
Q9WTQ5	Akap12	A-kinase anchor protein 12 OS=Mus musculus OX=10090 GN=Akap12 PE=1 SV=1	5.41e+18	0	128.762	27	25	128	0	25	1	483.16	128	25	0	>sp|Q9WTQ5|AKA12_MOUSE A-kinase anchor protein 12 OS=Mus musculus OX=10090 GN=Akap12 PE=1 SV=1	-0.1	-0.08	0.03	-0.04	0.08	0.07	-0.07	-0.2	0.01	-0.15	-0.04	0.25	-0.11	0.09	0.17	0.21	-0.29	0.04	0.09	-0.05	-0.22	-0.16	-0.12	0	0.07	0.25	-0.04	-0.15	-0.09	-0.04	-0.12	-0.06	-0.16
E9PWE8	Dpysl3	Isoform of Q62188, Dihydropyrimidinase-related protein 3 OS=Mus musculus OX=10090 GN=Dpysl3 PE=1 SV=1	-7.68e+18	0	128.636	47	20	195	1	17	1	693.86	195	20	0	>tr|E9PWE8|E9PWE8_MOUSE Isoform of Q62188, Dihydropyrimidinase-related protein 3 OS=Mus musculus OX=10090 GN=Dpysl3 PE=1 SV=1	-0.02	-0.08	-0.22	-0.2	-0.43	-0.26	-0.29	-0.26	-0.44	-0.27	-0.02	0.18	-0.41	0.18	-0.45	-0.25	-0.17	-0.1	-0.15	-0.04	-0.01	0.09	0.17	-0.49	-0.14	0.03	0.03	-0.23	0.04	0.08	-0.16	-0.29	-0.09
Q9DBG7	Srpra	Signal recognition particle receptor subunit alpha OS=Mus musculus OX=10090 GN=Srpra PE=1 SV=1	2.59e+18	0	128.618	42	23	220	13	23	1	701.84	220	23	0	>sp|Q9DBG7|SRPRA_MOUSE Signal recognition particle receptor subunit alpha OS=Mus musculus OX=10090 GN=Srpra PE=1 SV=1	0.15	-0.12	0	-0.06	-0.02	-0.12	-0.14	0.03	-0.39	-0.02	0.06	-0.08	-0.18	-0.28	-0.09	-0.13	-0.07	0.13	0.07	-0.27	-0.11	-0.26	-0.25	-0.21	-0.1	0.19	-0.16	-0.09	-0.08	-0.12	-0.07	-0.22	-0.05
Q6P1F6	Ppp2r2a	Serine/threonine-protein phosphatase 2A 55 kDa regulatory subunit B alpha isoform OS=Mus musculus OX=10090 GN=Ppp2r2a PE=1 SV=1	8.73e+18	0	128.466	49	19	242	4	10	1	855.62	242	19	9	>sp|Q6P1F6|2ABA_MOUSE Serine/threonine-protein phosphatase 2A 55 kDa regulatory subunit B alpha isoform OS=Mus musculus OX=10090 GN=Ppp2r2a PE=1 SV=1	0.04	-0.03	0.14	0.05	0.01	0.07	0.08	0.11	-0.07	0.11	0.07	0.04	-0.04	-0.26	0	0.08	0.01	0.08	-0.02	-0.23	-0.02	-0.08	-0.29	0	-0.04	-0.21	-0.46	-0.03	-0.14	-0.16	-0.05	-0.1	0
P51660	Hsd17b4	Peroxisomal multifunctional enzyme type 2 OS=Mus musculus OX=10090 GN=Hsd17b4 PE=1 SV=3	-6.12e+18	0	128.168	38	19	234	19	19	1	708.26	234	19	0	>sp|P51660|DHB4_MOUSE Peroxisomal multifunctional enzyme type 2 OS=Mus musculus OX=10090 GN=Hsd17b4 PE=1 SV=3	-0.3	-0.21	-0.11	0.05	0.06	0.08	-0.18	0.04	0.11	-0.04	-0.27	-0.12	0.23	0.27	0.45	0.3	0.12	-0.07	0.13	0.58	0.02	0.05	-0.13	0.17	-0.11	-0.07	0.26	-0.13	0.25	0.25	-0.04	0.15	-0.02
P48036	Anxa5	Annexin A5 OS=Mus musculus OX=10090 GN=Anxa5 PE=1 SV=1	-7.62e+18	0	128.084	70	21	492	14	21	1	1632.05	492	21	0	>sp|P48036|ANXA5_MOUSE Annexin A5 OS=Mus musculus OX=10090 GN=Anxa5 PE=1 SV=1	0	0.2	-0.02	0.07	-0.06	0.47	-0.09	-0.24	0.22	-0.01	-0.1	0.42	0.18	0.44	0.52	0.33	0.07	-0.16	-0.09	0.32	-0.15	-0.1	-0.11	0.4	0.09	0.17	0.35	-0.08	0.08	0.36	-0.04	0.2	0.03
M0QW57	Jsrp1	Isoform of Q3MI48, Junctional sarcoplasmic reticulum protein 1 OS=Mus musculus OX=10090 GN=Jsrp1 PE=1 SV=1	-7.37e+18	0	127.794	42	10	238	0	10	1	958.8	238	10	0	>tr|M0QW57|M0QW57_MOUSE Isoform of Q3MI48, Junctional sarcoplasmic reticulum protein 1 OS=Mus musculus OX=10090 GN=Jsrp1 PE=1 SV=1	0.2	0.2	0.03	-0.05	-0.03	-0.1	-0.01	-0.03	-0.37	0.02	0.17	0.07	-0.12	-0.36	-0.23	0.08	-0.1	0.35	0.16	-0.38	-0.17	0.02	-0.09	-0.22	-0.06	0.13	-0.01	-0.12	-0.03	-0.28	0.04	-0.04	0.09
P62897	Cycs	Cytochrome c, somatic OS=Mus musculus OX=10090 GN=Cycs PE=1 SV=2	2.75e+17	0	127.767	57	8	661	7	8	1	2264.22	661	8	0	>sp|P62897|CYC_MOUSE Cytochrome c, somatic OS=Mus musculus OX=10090 GN=Cycs PE=1 SV=2	0.08	0.15	0.06	0.06	0.24	-0.02	0.12	0.04	0.27	0.14	0.03	-0.32	-0.01	-0.18	0.16	0.23	-0.1	-0.12	0.12	-0.12	0.06	0.18	0.05	-0.14	-0.04	0	0.07	0.19	0.12	0.09	0.01	0.03	0.06
Q8BVI4	Qdpr	Dihydropteridine reductase OS=Mus musculus OX=10090 GN=Qdpr PE=1 SV=2	8.51e+18	0	127.666	57	9	246	0	9	1	937.19	246	9	0	>sp|Q8BVI4|DHPR_MOUSE Dihydropteridine reductase OS=Mus musculus OX=10090 GN=Qdpr PE=1 SV=2	0.12	-0.02	0.14	0.09	-0.09	-0.09	-0.11	0.21	-0.27	-0.09	0.2	0.15	0.01	0.07	0.08	-0.01	0.27	0.14	0.12	-0.16	-0.05	-0.08	-0.08	-0.11	-0.01	-0.2	-0.22	0.04	-0.12	-0.13	0.05	0.06	-0.01
Q9DBJ1	Pgam1	Phosphoglycerate mutase 1 OS=Mus musculus OX=10090 GN=Pgam1 PE=1 SV=3	-1.43e+18	0	127.643	60	12	814	7	7	1	2591.4	814	12	0	>sp|Q9DBJ1|PGAM1_MOUSE Phosphoglycerate mutase 1 OS=Mus musculus OX=10090 GN=Pgam1 PE=1 SV=3	0.03	0.25	-0.06	0.08	-0.03	0.21	0.03	-0.15	0.63	0	-0.12	0.23	0.65	0.72	0.76	0.66	0.12	0	0.01	0.31	-0.02	-0.04	-0.08	0.44	0.06	0.06	0.1	-0.14	-0.01	0.66	-0.02	0.52	0.07
B1AQ77	Krt15	Isoform of Q61414, Keratin 15, isoform CRA_a OS=Mus musculus OX=10090 GN=Krt15 PE=1 SV=1	4.46e+18	0	127.602	50	22	258	0	17	1	841.91	258	22	0	>tr|B1AQ77|B1AQ77_MOUSE Isoform of Q61414, Keratin 15, isoform CRA_a OS=Mus musculus OX=10090 GN=Krt15 PE=1 SV=1	-2.56	1.1	-0.48	-1.47	0.02	2.56	-1.85	-1.39	-1.63	-1.24	-0.47	2.35	0.82	1.06	-1.72	-0.88	0.13	-1.61	-2.01	1.18	-2.97	-2.38	-2.88	-1.79	-2.2	-0.67	0.02	2.1	0.18	0.68	0.5	-1.12	-1.46
P63101	Ywhaz	14-3-3 protein zeta/delta OS=Mus musculus OX=10090 GN=Ywhaz PE=1 SV=1	8.25e+18	0	127.553	66	15	523	2	11	1	1620.06	523	15	2	>sp|P63101|1433Z_MOUSE 14-3-3 protein zeta/delta OS=Mus musculus OX=10090 GN=Ywhaz PE=1 SV=1	0.14	0.34	-0.06	-0.13	-0.04	0.15	0.02	-0.22	-0.1	-0.2	0.16	0.28	-0.07	-0.14	-0.22	0.17	0.26	0.02	0.15	-0.12	-0.27	-0.18	-0.31	0.08	0.07	0.23	-0.12	-0.08	-0.2	0.06	-0.08	-0.02	-0.14
Q6GT24	Prdx6	Isoform of O08709, Peroxiredoxin-6 OS=Mus musculus OX=10090 GN=Prdx6 PE=1 SV=1	-3.36e+18	0	127.539	74	16	476	0	1	1	1803.34	476	16	0	>tr|Q6GT24|Q6GT24_MOUSE Isoform of O08709, Peroxiredoxin-6 OS=Mus musculus OX=10090 GN=Prdx6 PE=1 SV=1	0.48	0.52	1.01	0.94	0.89	NaN	0.52	0.96	0.98	1.11	0.74	0.62	NaN	0.96	0.96	NaN	NaN	-4.09	-6.58	0.82	1	-2.61	-0.66	0.29	0.55	NaN	1.03	0.86	0.38	0.89	0.44	0.63	0.79
Q9Z1Z2	Strap	Serine-threonine kinase receptor-associated protein OS=Mus musculus OX=10090 GN=Strap PE=1 SV=2	-7.66e+18	0	127.521	64	16	214	16	16	1	843.26	214	16	0	>sp|Q9Z1Z2|STRAP_MOUSE Serine-threonine kinase receptor-associated protein OS=Mus musculus OX=10090 GN=Strap PE=1 SV=2	0.26	0.15	0.04	0.06	0.09	0.18	0.02	0.04	0.09	0.07	0.05	-0.03	0.01	-0.16	0.02	-0.08	0.11	0.08	0.12	-0.12	-0.06	0.04	-0.18	0.17	0.04	-0.13	-0.27	-0.03	0	-0.05	0.03	0.06	0
Q8CC35	Synpo	Synaptopodin OS=Mus musculus OX=10090 GN=Synpo PE=1 SV=2	5.55e+18	0	127.438	29	17	269	0	17	1	962.33	269	17	0	>sp|Q8CC35|SYNPO_MOUSE Synaptopodin OS=Mus musculus OX=10090 GN=Synpo PE=1 SV=2	-0.28	-0.02	-0.04	-0.05	-0.09	-0.36	-0.03	-0.01	0.14	0.14	0.08	-0.16	-0.33	-0.07	0.02	-0.2	-0.1	-0.19	-0.31	-0.23	0.12	-0.26	0.1	-0.36	0.13	-0.04	0	0.11	-0.06	-0.05	-0.21	0.08	0.23
O08709	Prdx6	Peroxiredoxin-6 OS=Mus musculus OX=10090 GN=Prdx6 PE=1 SV=3	1.86e+18	0	127.422	74	16	468	1	1	1	1780.47	468	16	16	>sp|O08709|PRDX6_MOUSE Peroxiredoxin-6 OS=Mus musculus OX=10090 GN=Prdx6 PE=1 SV=3	-0.19	0.15	0.01	0.16	0	0.05	-0.11	0.16	0.27	0.07	-0.03	0.06	-0.07	0.11	0.27	0.09	-0.23	-0.1	-0.06	0.04	0.05	0.37	0.31	0.05	-0.14	0	-0.23	-0.05	-0.2	-0.02	-0.2	0.09	-0.12
O70423	Aoc3	Membrane primary amine oxidase OS=Mus musculus OX=10090 GN=Aoc3 PE=1 SV=3	-2.36e+18	0	127.354	26	14	220	0	14	1	773.6	220	14	0	>sp|O70423|AOC3_MOUSE Membrane primary amine oxidase OS=Mus musculus OX=10090 GN=Aoc3 PE=1 SV=3	-0.37	0.25	-0.05	0.46	-0.12	0.56	-0.11	-0.15	1.19	-0.02	-0.13	0.32	0.69	0.92	1.04	0.93	0.05	0.13	-0.27	1.31	0.38	0.89	0.43	0.77	-0.21	-0.06	0.33	-0.34	0.06	0.53	0.12	0.69	-0.24
P97298	Serpinf1	Pigment epithelium-derived factor OS=Mus musculus OX=10090 GN=Serpinf1 PE=1 SV=2	1.3e+18	0	127.345	49	15	217	8	15	1	824.14	217	15	0	>sp|P97298|PEDF_MOUSE Pigment epithelium-derived factor OS=Mus musculus OX=10090 GN=Serpinf1 PE=1 SV=2	0.67	1.11	-0.18	-0.71	-0.78	-0.29	-0.76	-0.87	-1	-0.7	-1.08	0.11	-1.23	-1.28	-0.9	-0.36	-0.9	-1.31	-0.7	-0.48	-0.15	-0.75	-0.15	-1.32	0.02	-0.03	0.05	-0.7	0.1	-0.49	-0.59	-0.73	0.03
E0CYV0	Pcmt1	Isoform of P23506, Protein-L-isoaspartate O-methyltransferase OS=Mus musculus OX=10090 GN=Pcmt1 PE=1 SV=1	-2.3e+18	0	127.094	70	14	324	0	14	1	1160.21	324	14	0	>tr|E0CYV0|E0CYV0_MOUSE Isoform of P23506, Protein-L-isoaspartate O-methyltransferase OS=Mus musculus OX=10090 GN=Pcmt1 PE=1 SV=1	0.04	0.09	0.09	0.08	0.1	0	0.14	0.11	0.13	0.23	0.08	-0.02	0.04	0.07	0.07	0.07	-0.05	0.19	0.22	-0.11	0.03	-0.19	-0.14	0.04	-0.02	0.17	-0.07	0.1	0.07	-0.08	0.15	0.03	0.1
P47757	Capzb	F-actin-capping protein subunit beta OS=Mus musculus OX=10090 GN=Capzb PE=1 SV=3	-2.67e+18	0	126.924	58	15	534	2	2	1	1773.74	534	15	0	>sp|P47757|CAPZB_MOUSE F-actin-capping protein subunit beta OS=Mus musculus OX=10090 GN=Capzb PE=1 SV=3	0.27	0.23	0.1	0.11	0.19	0.12	0.11	0.09	-0.07	0.2	0.11	0.04	-0.03	0.27	-0.01	-0.04	0.1	0.21	0.18	-0.28	0.08	-0.01	-0.29	0.09	0.07	-0.29	0	0.01	-0.05	-0.08	0.11	0.03	0.12
Q61233	Lcp1	Plastin-2 OS=Mus musculus OX=10090 GN=Lcp1 PE=1 SV=4	-2.63e+18	0	126.705	44	21	217	14	17	1	675.48	217	21	0	>sp|Q61233|PLSL_MOUSE Plastin-2 OS=Mus musculus OX=10090 GN=Lcp1 PE=1 SV=4	-0.13	0.12	0.07	0.15	-0.14	0.38	-0.17	-0.18	0	0.05	-0.39	1.36	0.77	1.62	0.68	0.08	1.84	-0.29	-0.36	0.59	-0.23	-0.2	0.23	2.18	-0.19	0.4	1.25	-0.11	0.29	1.54	0.17	0.82	-0.04
O35129	Phb2	Prohibitin-2 OS=Mus musculus OX=10090 GN=Phb2 PE=1 SV=1	-2.5e+18	0	126.227	67	18	529	7	18	1	1955.31	529	18	0	>sp|O35129|PHB2_MOUSE Prohibitin-2 OS=Mus musculus OX=10090 GN=Phb2 PE=1 SV=1	0.04	0.03	0.03	0.04	0.17	0.08	0.14	0.14	0.2	0.12	0.09	-0.04	0.17	0.18	0.26	0.27	0.08	0.05	0.1	0.06	0.09	0.06	0.07	0.12	0.18	0.03	-0.04	0.15	0.15	0.12	0.08	0.12	0.12
B2C3G8	Stat5a	Isoform of P42230, Signal transducer and activator of transcription OS=Mus musculus OX=10090 GN=Stat5a PE=1 SV=1	2.56e+18	0	126.191	37	22	259	0	2	1	901.5	259	22	0	>tr|B2C3G8|B2C3G8_MOUSE Isoform of P42230, Signal transducer and activator of transcription OS=Mus musculus OX=10090 GN=Stat5a PE=1 SV=1	NaN	NaN	NaN	NaN	NaN	NaN	NaN	NaN	NaN	NaN	NaN	NaN	NaN	NaN	NaN	NaN	NaN	NaN	NaN	NaN	NaN	NaN	NaN	NaN	NaN	NaN	NaN	NaN	NaN	NaN	NaN	NaN	NaN
O35459	Ech1	Delta(3,5)-Delta(2,4)-dienoyl-CoA isomerase, mitochondrial OS=Mus musculus OX=10090 GN=Ech1 PE=1 SV=1	2.59e+18	0	125.792	50	13	273	5	13	1	916.96	273	13	0	>sp|O35459|ECH1_MOUSE Delta(3,5)-Delta(2,4)-dienoyl-CoA isomerase, mitochondrial OS=Mus musculus OX=10090 GN=Ech1 PE=1 SV=1	-0.31	-0.19	-0.09	0.01	0.01	-0.09	0.04	0.31	0.37	0.05	-0.1	-0.43	0.32	0.23	0.64	0.23	-0.05	-0.3	0	0.05	0.17	0.05	-0.18	-0.11	0.07	-0.03	-0.04	0	-0.08	0.14	-0.16	0.01	-0.21
Q61699	Hsph1	Heat shock protein 105 kDa OS=Mus musculus OX=10090 GN=Hsph1 PE=1 SV=2	-6.52e+18	0	125.594	34	22	155	0	20	1	536.58	155	22	0	>sp|Q61699|HS105_MOUSE Heat shock protein 105 kDa OS=Mus musculus OX=10090 GN=Hsph1 PE=1 SV=2	-0.12	-0.13	0.14	0.04	0.08	0.05	0.01	0.16	-0.09	-0.01	0	-0.09	-0.05	-0.07	-0.25	-0.05	0.11	-0.16	-0.09	0.2	0.16	-0.03	0.01	-0.05	-0.17	0.17	-0.15	-0.14	0.04	-0.06	0.13	-0.12	0.09
Q9QYJ0	Dnaja2	DnaJ homolog subfamily A member 2 OS=Mus musculus OX=10090 GN=Dnaja2 PE=1 SV=1	6.43e+18	0	125.416	51	14	334	14	14	1	1331.27	334	14	0	>sp|Q9QYJ0|DNJA2_MOUSE DnaJ homolog subfamily A member 2 OS=Mus musculus OX=10090 GN=Dnaja2 PE=1 SV=1	0.12	0.24	0.13	0.14	0.06	0.13	0.12	0.19	0.06	0.1	0.17	-0.01	-0.02	0.02	0.05	0.17	0.02	-0.18	-0.19	-0.34	-0.17	0.13	0.01	-0.01	0.05	0.19	0.03	-0.02	-0.06	0.08	0.09	0.06	0.14
Q3B7Z2	Osbp	Oxysterol-binding protein 1 OS=Mus musculus OX=10090 GN=Osbp PE=1 SV=3	-3.79e+18	0	125.404	35	23	211	6	23	1	651.84	211	23	0	>sp|Q3B7Z2|OSBP1_MOUSE Oxysterol-binding protein 1 OS=Mus musculus OX=10090 GN=Osbp PE=1 SV=3	0.15	0.13	-0.04	-0.16	-0.15	-0.22	-0.09	0.02	-0.15	-0.25	-0.09	-0.16	-0.25	-0.18	-0.19	-0.23	-0.24	0.12	-0.03	-0.09	-0.1	0.02	0.02	-0.26	-0.03	-0.15	-0.06	-0.04	-0.1	-0.02	-0.01	-0.06	0.05
Q8BP47	Nars	Asparagine--tRNA ligase, cytoplasmic OS=Mus musculus OX=10090 GN=Nars PE=1 SV=2	2.76e+17	0	125.262	36	15	187	15	15	1	743.62	187	15	0	>sp|Q8BP47|SYNC_MOUSE Asparagine--tRNA ligase, cytoplasmic OS=Mus musculus OX=10090 GN=Nars PE=1 SV=2	0.39	0.04	-0.06	-0.14	0.09	0.02	0.12	0.04	-0.01	0.13	-0.06	-0.2	0.01	0.12	-0.12	-0.02	0	0.18	0.1	-0.16	-0.13	0.04	0.1	-0.04	0.14	0.2	0.27	0.04	0.04	-0.12	0.11	-0.06	0.26
Q8BKZ9	Pdhx	Pyruvate dehydrogenase protein X component, mitochondrial OS=Mus musculus OX=10090 GN=Pdhx PE=1 SV=1	1.81e+18	0	124.952	33	13	344	10	13	1	1226.85	344	13	0	>sp|Q8BKZ9|ODPX_MOUSE Pyruvate dehydrogenase protein X component, mitochondrial OS=Mus musculus OX=10090 GN=Pdhx PE=1 SV=1	-0.18	-0.07	-0.07	-0.02	0.07	-0.02	0.15	0.12	0.32	0.26	-0.08	-0.15	0.17	0.19	0.32	0.12	0.07	-0.22	-0.05	0.04	0.28	0.32	0.15	-0.01	0.16	0.06	0.44	0.15	0.18	0.19	0.11	0.13	0.2
Q9WUM5	Suclg1	Succinate--CoA ligase [ADP/GDP-forming] subunit alpha, mitochondrial OS=Mus musculus OX=10090 GN=Suclg1 PE=1 SV=4	-8.14e+18	0	124.766	40	13	615	10	13	1	2345.74	615	13	0	>sp|Q9WUM5|SUCA_MOUSE Succinate--CoA ligase [ADP/GDP-forming] subunit alpha, mitochondrial OS=Mus musculus OX=10090 GN=Suclg1 PE=1 SV=4	-0.12	-0.25	0.05	0.1	0.25	0.12	0.22	0.16	0.31	0.22	0.28	0	0.15	0.29	0.74	0.2	0.2	0.13	0.38	0.04	0.17	0.14	0.15	0.38	0.26	0.33	-0.19	0.06	0.02	-0.02	0.18	0.29	0.19
P23953	Ces1c	Carboxylesterase 1C OS=Mus musculus OX=10090 GN=Ces1c PE=1 SV=4	-1.71e+18	0	124.726	37	17	375	7	10	1	1258.45	375	17	6	>sp|P23953|EST1C_MOUSE Carboxylesterase 1C OS=Mus musculus OX=10090 GN=Ces1c PE=1 SV=4	-0.66	-0.41	-0.36	-0.29	-0.43	-0.37	-0.37	0.38	-0.27	-0.45	-0.26	-0.12	-0.43	-0.52	-0.32	-0.09	-0.28	0.09	-0.25	0.07	-0.22	-0.27	-0.13	-0.22	-0.2	0.22	0.88	-0.29	0.72	0.91	0.69	0.93	-0.42
Q99PV0	Prpf8	Pre-mRNA-processing-splicing factor 8 OS=Mus musculus OX=10090 GN=Prpf8 PE=1 SV=2	-5.85e+18	0	124.722	15	25	121	15	25	1	430.46	121	25	0	>sp|Q99PV0|PRP8_MOUSE Pre-mRNA-processing-splicing factor 8 OS=Mus musculus OX=10090 GN=Prpf8 PE=1 SV=2	0.08	-0.19	-0.56	0.01	-0.05	0.03	0.02	-0.11	0.05	0.08	-0.29	0.26	-0.03	0.45	0.08	-0.15	0.22	-0.04	-0.19	0.24	0.04	0.09	0.1	0.29	0.1	-0.04	0.87	0.06	0.04	0.17	-0.05	0.05	-0.02
P42125	Eci1	Enoyl-CoA delta isomerase 1, mitochondrial OS=Mus musculus OX=10090 GN=Eci1 PE=1 SV=2	8.57e+18	0	124.292	49	13	470	13	13	1	1550.28	470	13	0	>sp|P42125|ECI1_MOUSE Enoyl-CoA delta isomerase 1, mitochondrial OS=Mus musculus OX=10090 GN=Eci1 PE=1 SV=2	-0.4	-0.36	0	-0.11	0.22	-0.1	-0.19	0.31	0.02	-0.19	-0.08	-0.51	0.15	0.19	0.38	0.18	0.06	-0.12	0.2	-0.19	0.14	0.13	0.02	-0.28	-0.03	-0.05	-0.27	0.12	0.13	0.14	0.04	0.18	0.09
E9QNN1	Dhx9	Isoform of O70133, ATP-dependent RNA helicase A OS=Mus musculus OX=10090 GN=Dhx9 PE=1 SV=1	4.04e+18	0	124.255	20	21	178	0	21	1	681.52	178	21	0	>tr|E9QNN1|E9QNN1_MOUSE Isoform of O70133, ATP-dependent RNA helicase A OS=Mus musculus OX=10090 GN=Dhx9 PE=1 SV=1	0.04	0.13	-0.02	-0.02	0.01	-0.03	0.09	-0.12	0.14	0.08	-0.02	0.18	-0.03	0.12	0.05	0.01	0.24	0	0	0.19	-0.02	0.1	-0.03	0.43	0.13	0.01	0.03	-0.03	0.02	0.18	0.01	0.03	-0.07
Q3UTJ2-2	Sorbs2	Isoform of Q3UTJ2, Isoform 2 of Sorbin and SH3 domain-containing protein 2 OS=Mus musculus OX=10090 GN=Sorbs2	9.44e+17	0	124.046	20	20	181	0	20	1	676.37	181	20	0	>sp|Q3UTJ2-2|SRBS2_MOUSE Isoform of Q3UTJ2, Isoform 2 of Sorbin and SH3 domain-containing protein 2 OS=Mus musculus OX=10090 GN=Sorbs2	-0.22	-0.2	-0.08	0.12	-0.35	-0.22	-0.02	-0.01	0.18	0.07	0.3	0.07	0.03	0.3	-0.22	-0.06	-0.01	0.12	-0.05	0.24	0.41	0.06	0.34	-0.11	0.12	-0.03	-0.11	0.08	0.21	-0.09	0.19	0.07	0.13
E9PV24	Fga	Fibrinogen alpha chain OS=Mus musculus OX=10090 GN=Fga PE=1 SV=1	-1.42e+18	0	123.895	29	17	292	0	17	1	1093.47	292	17	0	>sp|E9PV24|FIBA_MOUSE Fibrinogen alpha chain OS=Mus musculus OX=10090 GN=Fga PE=1 SV=1	-0.29	-0.08	-0.07	-0.15	-0.3	-0.37	-0.24	-0.36	-0.29	-0.41	-0.28	-0.07	-0.56	-0.22	-0.2	-0.05	-0.04	0.12	-0.31	0.55	-0.21	-0.02	0.2	-0.17	-0.34	-0.32	0.19	-0.25	-0.13	0.34	-0.2	0	-0.31
Q922R8	Pdia6	Protein disulfide-isomerase A6 OS=Mus musculus OX=10090 GN=Pdia6 PE=1 SV=3	-8.91e+18	0	123.824	44	15	222	1	1	1	833.23	222	15	0	>sp|Q922R8|PDIA6_MOUSE Protein disulfide-isomerase A6 OS=Mus musculus OX=10090 GN=Pdia6 PE=1 SV=3	0.76	0.64	-0.66	-1.77	0.18	0.04	0.41	-2.04	0.46	0.72	0.21	0.47	0.32	0.07	0.25	0.32	0.36	0.54	0.5	0.54	0.39	0.33	0.52	0.41	0.37	-0.16	-1.62	0.39	-1.38	-1.79	-1.42	-2.41	-0.05
F8WIV5	Dnm2	Isoform of P39054, Dynamin-2 OS=Mus musculus OX=10090 GN=Dnm2 PE=1 SV=2	-8.43e+16	0	123.676	30	21	227	0	11	1	715.84	227	21	11	>tr|F8WIV5|F8WIV5_MOUSE Isoform of P39054, Dynamin-2 OS=Mus musculus OX=10090 GN=Dnm2 PE=1 SV=2	-0.08	-0.02	0	-0.04	-0.03	0.04	-0.09	-0.09	-0.04	0	-0.03	0	0	-0.02	-0.12	0.06	-0.04	0.01	0.03	0.05	-0.06	0	0.1	0.16	-0.05	0.22	-0.14	-0.08	-0.03	0.03	-0.07	-0.06	0.15
Q9QYR9	Acot2	Acyl-coenzyme A thioesterase 2, mitochondrial OS=Mus musculus OX=10090 GN=Acot2 PE=1 SV=2	8.87e+18	0	123.546	47	17	260	9	15	1	1054.89	260	17	2	>sp|Q9QYR9|ACOT2_MOUSE Acyl-coenzyme A thioesterase 2, mitochondrial OS=Mus musculus OX=10090 GN=Acot2 PE=1 SV=2	-0.57	-0.29	-0.08	-0.01	-0.01	-0.22	0.27	0.5	0.79	0.42	-0.08	-0.27	0.15	0.26	0.49	0.14	-0.03	-0.13	0.19	0.07	0.2	0.06	0.06	0.1	0.23	-0.03	0.1	-0.04	0.03	0.19	-0.03	0.13	0.06
O70209	Pdlim3	PDZ and LIM domain protein 3 OS=Mus musculus OX=10090 GN=Pdlim3 PE=1 SV=1	3.21e+18	0	123.303	55	12	435	1	1	1	1642.32	435	12	0	>sp|O70209|PDLI3_MOUSE PDZ and LIM domain protein 3 OS=Mus musculus OX=10090 GN=Pdlim3 PE=1 SV=1	NaN	NaN	NaN	NaN	NaN	NaN	NaN	NaN	NaN	-0.09	NaN	NaN	NaN	NaN	NaN	NaN	NaN	NaN	NaN	NaN	NaN	NaN	0.13	NaN	NaN	NaN	NaN	NaN	NaN	NaN	NaN	NaN	NaN
Q9D154	Serpinb1a	Leukocyte elastase inhibitor A OS=Mus musculus OX=10090 GN=Serpinb1a PE=1 SV=1	5.89e+18	0	123.281	53	18	241	7	18	1	793.29	241	18	0	>sp|Q9D154|ILEUA_MOUSE Leukocyte elastase inhibitor A OS=Mus musculus OX=10090 GN=Serpinb1a PE=1 SV=1	0.17	0.33	-0.11	-0.21	-0.36	-0.32	-0.57	-0.69	-0.57	-0.48	-0.6	0.08	-0.36	-0.36	-0.59	-0.36	-0.35	-0.31	-0.26	0.29	0.21	-0.24	-0.13	-0.06	-0.63	-0.24	0.3	-0.47	-0.58	0	-0.56	-0.34	0.06
P47757-4	Capzb	Isoform of P47757, Isoform 3 of F-actin-capping protein subunit beta OS=Mus musculus OX=10090 GN=Capzb	-1.46e+18	0	123.121	53	15	498	0	2	1	1661.03	498	15	17	>sp|P47757-4|CAPZB_MOUSE Isoform of P47757, Isoform 3 of F-actin-capping protein subunit beta OS=Mus musculus OX=10090 GN=Capzb	0.06	0.18	0.14	0.09	0.04	0.18	0.02	0	-0.07	0.12	0.2	0.02	0.06	0.08	-0.02	0.1	0.18	0.12	0.11	-0.17	-0.02	0	-0.01	0.07	0.04	0.04	-0.3	-0.03	-0.02	-0.15	0.09	0.01	-0.02
Q99J99	Mpst	3-mercaptopyruvate sulfurtransferase OS=Mus musculus OX=10090 GN=Mpst PE=1 SV=4	6.07e+18	0	123.091	55	12	313	6	12	1	1108.08	313	12	0	>sp|Q99J99|THTM_MOUSE 3-mercaptopyruvate sulfurtransferase OS=Mus musculus OX=10090 GN=Mpst PE=1 SV=4	0.08	-0.03	-0.69	-0.82	-0.8	-0.9	0.14	0.29	0.23	0.34	0.11	0.02	-1.23	-0.93	-1.14	-0.72	-0.64	0.25	0.33	0.01	0.12	0.25	0.2	-0.69	-0.65	-0.89	-0.78	0.16	-0.74	-0.77	-0.65	-0.59	-0.59
P35700	Prdx1	Peroxiredoxin-1 OS=Mus musculus OX=10090 GN=Prdx1 PE=1 SV=1	-6.99e+18	0	122.955	72	15	433	1	13	1	1346.86	433	15	2	>sp|P35700|PRDX1_MOUSE Peroxiredoxin-1 OS=Mus musculus OX=10090 GN=Prdx1 PE=1 SV=1	0.2	0.19	0.12	0.19	0.21	0.33	0.1	0.23	0.24	0.23	0.3	0.23	-0.05	0.17	0.25	0.07	0.08	0.29	0.31	-0.05	0.06	0.07	0.02	0.34	0.12	0.2	-0.28	0.13	-0.06	0.11	0.15	0.14	0.12
Q9JK42	Pdk2	[Pyruvate dehydrogenase (acetyl-transferring)] kinase isozyme 2, mitochondrial OS=Mus musculus OX=10090 GN=Pdk2 PE=1 SV=2	-7.85e+18	0	122.888	47	15	320	12	13	1	1105.01	320	15	1	>sp|Q9JK42|PDK2_MOUSE [Pyruvate dehydrogenase (acetyl-transferring)] kinase isozyme 2, mitochondrial OS=Mus musculus OX=10090 GN=Pdk2 PE=1 SV=2	0	0.06	-0.03	-0.03	0.18	-0.03	-0.07	0.17	-0.07	-0.03	0.06	-0.48	-0.2	-0.23	-0.09	0.12	-0.1	-0.02	0.14	-0.41	-0.03	-0.04	-0.51	-0.4	0.08	0.18	-0.25	0.14	-0.06	-0.15	-0.03	0.01	0.04
P51885	Lum	Lumican OS=Mus musculus OX=10090 GN=Lum PE=1 SV=2	6.18e+18	0	122.854	41	11	379	11	11	1	1396.03	379	11	0	>sp|P51885|LUM_MOUSE Lumican OS=Mus musculus OX=10090 GN=Lum PE=1 SV=2	0.15	0.25	0.28	0.22	0.2	0.36	-0.34	-0.16	-0.06	-0.05	-0.07	0.71	0.08	0.1	0.44	0.05	-0.22	0.22	-0.09	0.45	-0.26	-0.11	-0.28	0.35	0.03	0.33	0.27	0.06	-0.14	0.19	-0.26	-0.15	-0.44
A2AEX8	Fhl1	Isoform of P97447, Four and a half LIM domains 1, isoform CRA_b OS=Mus musculus OX=10090 GN=Fhl1 PE=1 SV=1	5.09e+18	0	122.826	63	16	646	0	16	1	2454.73	646	16	0	>tr|A2AEX8|A2AEX8_MOUSE Isoform of P97447, Four and a half LIM domains 1, isoform CRA_b OS=Mus musculus OX=10090 GN=Fhl1 PE=1 SV=1	-0.69	-0.23	-0.18	0.05	0.14	-0.7	0.31	-0.28	0.25	-0.13	-0.16	-0.45	-0.12	0.24	0.56	-0.49	-0.04	-1.15	-0.39	0.42	0.13	-0.15	0.25	-0.7	0.37	0.14	0.59	0.21	-0.15	-0.09	-0.2	0.05	0.08
P04104	Krt1	Keratin, type II cytoskeletal 1 OS=Mus musculus OX=10090 GN=Krt1 PE=1 SV=4	-2.19e+18	0	122.741	32	21	216	16	16	1	719.78	216	21	1	>sp|P04104|K2C1_MOUSE Keratin, type II cytoskeletal 1 OS=Mus musculus OX=10090 GN=Krt1 PE=1 SV=4	-0.61	0.89	0.04	-0.48	-0.27	1.04	-0.67	-0.88	-1.04	-0.81	-0.54	1.3	-0.17	0.22	-0.33	-0.44	-0.24	0.06	-0.87	2.07	-0.78	-0.63	0.09	-0.75	-0.24	0.26	-0.5	1.75	0.78	0.45	0.41	-0.48	-0.27
Q8R1B4	Eif3c	Eukaryotic translation initiation factor 3 subunit C OS=Mus musculus OX=10090 GN=Eif3c PE=1 SV=1	-2.12e+18	0	122.621	30	23	218	20	23	1	657.84	218	23	0	>sp|Q8R1B4|EIF3C_MOUSE Eukaryotic translation initiation factor 3 subunit C OS=Mus musculus OX=10090 GN=Eif3c PE=1 SV=1	0.38	-0.09	0.01	0.02	-0.06	-0.08	-0.03	0.07	0.01	-0.02	0.04	0.03	-0.01	0.03	-0.07	0.02	0.01	0.03	-0.08	0.09	0.21	-0.1	-0.12	0.05	0.13	-0.19	0.08	0.28	0.05	0.2	0.02	0.03	0.07
P35235	Ptpn11	Tyrosine-protein phosphatase non-receptor type 11 OS=Mus musculus OX=10090 GN=Ptpn11 PE=1 SV=2	-4.16e+18	0	122.603	47	21	185	1	21	1	575.72	185	21	0	>sp|P35235|PTN11_MOUSE Tyrosine-protein phosphatase non-receptor type 11 OS=Mus musculus OX=10090 GN=Ptpn11 PE=1 SV=2	0.18	0.15	0.01	0.07	0.12	0.28	0.18	-0.12	0.01	0.13	0.04	0.1	-0.03	-0.1	0.06	0.02	-0.03	0.06	0.03	-0.02	-0.03	0.03	0.04	0.13	0	0.18	-0.06	-0.11	0.03	0.04	0.01	-0.05	0.09
P26645	Marcks	Myristoylated alanine-rich C-kinase substrate OS=Mus musculus OX=10090 GN=Marcks PE=1 SV=2	5.23e+18	0	122.575	68	13	59	13	13	1	248.36	59	13	0	>sp|P26645|MARCS_MOUSE Myristoylated alanine-rich C-kinase substrate OS=Mus musculus OX=10090 GN=Marcks PE=1 SV=2	-0.35	-0.21	-0.14	-0.09	-0.24	-0.07	-0.07	-0.1	0.01	0.02	-0.66	0.11	-0.38	0.01	-0.12	0.31	0.17	-0.34	-0.24	0.11	-0.1	-0.09	0.14	-0.13	-0.05	-0.37	0.36	-0.2	-0.18	0.27	-0.02	0.02	-0.06
O09161	Casq2	Calsequestrin-2 OS=Mus musculus OX=10090 GN=Casq2 PE=1 SV=3	4.92e+18	0	121.998	39	13	366	0	13	1	1247.17	366	13	0	>sp|O09161|CASQ2_MOUSE Calsequestrin-2 OS=Mus musculus OX=10090 GN=Casq2 PE=1 SV=3	-0.33	-0.02	-0.04	0.15	0.01	-0.29	0.09	0.22	-0.2	-0.24	0.34	-0.07	-0.27	-0.31	-0.06	0.16	0.12	-0.51	-0.17	0.11	0.42	-0.12	0.05	-0.01	0.3	0.14	0.07	0.35	0.02	0.07	0.05	0.18	-0.1
Q69ZR2	Hectd1	E3 ubiquitin-protein ligase HECTD1 OS=Mus musculus OX=10090 GN=Hectd1 PE=1 SV=2	-3.37e+18	0	121.835	15	29	132	0	29	1	356.89	132	29	0	>sp|Q69ZR2|HECD1_MOUSE E3 ubiquitin-protein ligase HECTD1 OS=Mus musculus OX=10090 GN=Hectd1 PE=1 SV=2	-0.02	-0.1	-0.18	-0.22	0.05	-0.28	-0.11	-0.02	-0.14	-0.01	-0.08	-0.28	-0.1	-0.33	-0.39	-0.19	-0.03	0	-0.1	-0.15	-0.16	0.02	-0.06	-0.36	-0.14	-0.06	-0.42	0.01	-0.04	-0.2	-0.06	-0.11	0.01
Q99P72	Rtn4	Reticulon-4 OS=Mus musculus OX=10090 GN=Rtn4 PE=1 SV=2	-5.7e+18	0	121.764	20	15	567	0	8	1	2015.44	567	15	7	>sp|Q99P72|RTN4_MOUSE Reticulon-4 OS=Mus musculus OX=10090 GN=Rtn4 PE=1 SV=2	0.23	0.1	-0.02	-0.06	0.02	-0.11	-0.09	-0.01	-0.21	-0.22	0.03	-0.17	-0.08	-0.12	-0.14	-0.27	-0.21	0.17	0.14	-0.23	-0.1	0	-0.1	-0.18	-0.02	-0.15	-0.19	-0.04	-0.21	-0.29	-0.12	-0.21	0.01
Q9WVJ2	Psmd13	26S proteasome non-ATPase regulatory subunit 13 OS=Mus musculus OX=10090 GN=Psmd13 PE=1 SV=1	2.87e+18	0	121.678	53	17	252	0	17	1	917.4	252	17	0	>sp|Q9WVJ2|PSD13_MOUSE 26S proteasome non-ATPase regulatory subunit 13 OS=Mus musculus OX=10090 GN=Psmd13 PE=1 SV=1	0.12	-0.01	-0.03	-0.05	-0.07	-0.28	0	0.01	-0.09	0.05	-0.01	-0.24	-0.06	-0.34	-0.21	-0.11	-0.01	0.07	0.03	-0.12	-0.07	-0.09	-0.25	-0.34	-0.12	0.03	-0.4	-0.04	-0.08	-0.24	-0.02	-0.22	0.12
Q9D6J6	Ndufv2	NADH dehydrogenase [ubiquinone] flavoprotein 2, mitochondrial OS=Mus musculus OX=10090 GN=Ndufv2 PE=1 SV=2	5.43e+18	0	121.434	56	12	389	5	12	1	1401.17	389	12	0	>sp|Q9D6J6|NDUV2_MOUSE NADH dehydrogenase [ubiquinone] flavoprotein 2, mitochondrial OS=Mus musculus OX=10090 GN=Ndufv2 PE=1 SV=2	-0.4	-0.25	0.03	0.12	0.06	0.08	0.07	-0.06	0.17	0.09	-0.09	-0.34	0.07	0.07	0.36	0.1	-0.09	-0.11	0.05	0.06	0.06	-0.05	-0.1	-0.03	0.09	0.26	0.11	0.04	0.08	0.08	0.05	0.17	0.17
Q9EP69	Sacm1l	Phosphatidylinositide phosphatase SAC1 OS=Mus musculus OX=10090 GN=Sacm1l PE=1 SV=1	-5.32e+18	0	120.846	38	19	235	19	19	1	706.99	235	19	0	>sp|Q9EP69|SAC1_MOUSE Phosphatidylinositide phosphatase SAC1 OS=Mus musculus OX=10090 GN=Sacm1l PE=1 SV=1	0.15	-0.17	-0.04	0.03	0.11	0.1	0.04	0.05	0.23	0.07	0.04	0.04	-0.05	0.21	0.1	-0.04	0.11	0.01	0.09	0.09	0.19	0.17	0.11	0.09	0.06	-0.1	-0.2	0.02	0.01	0.06	0.11	0.16	0.13
Q63810	Ppp3r1	Calcineurin subunit B type 1 OS=Mus musculus OX=10090 GN=Ppp3r1 PE=1 SV=3	4.68e+18	0	120.692	62	8	212	0	8	1	849.28	212	8	0	>sp|Q63810|CANB1_MOUSE Calcineurin subunit B type 1 OS=Mus musculus OX=10090 GN=Ppp3r1 PE=1 SV=3	0.15	0.16	0.11	-0.01	0.07	0.05	0.1	0.02	0.14	0.19	0.19	0.07	-0.06	-0.02	0.1	-0.01	0.12	0.09	0.05	-0.25	-0.3	0.08	-0.03	0.22	0.09	0.1	-0.24	-0.04	-0.03	-0.14	0.14	0.19	-0.03
Q62165	Dag1	Dystroglycan OS=Mus musculus OX=10090 GN=Dag1 PE=1 SV=4	-4.89e+18	0	120.621	20	14	296	14	14	1	1019.52	296	14	0	>sp|Q62165|DAG1_MOUSE Dystroglycan OS=Mus musculus OX=10090 GN=Dag1 PE=1 SV=4	0.26	0.2	0.2	0.11	0.18	0.03	0.15	0.02	0.17	0.15	0.14	0	0	-0.02	0.04	-0.08	-0.1	-0.03	0.03	0.06	0.21	-0.03	-0.03	0.13	0.21	0.25	-0.04	0.16	0	-0.1	-0.02	0	0.06
P29341	Pabpc1	Polyadenylate-binding protein 1 OS=Mus musculus OX=10090 GN=Pabpc1 PE=1 SV=2	-8.28e+18	0	120.618	36	20	222	1	12	1	743.51	222	20	0	>sp|P29341|PABP1_MOUSE Polyadenylate-binding protein 1 OS=Mus musculus OX=10090 GN=Pabpc1 PE=1 SV=2	-0.06	-0.07	0.02	0.07	-0.08	0.15	1.34	-0.2	1.26	1.24	-0.14	0.26	0.11	0.26	0.33	0.22	0.36	-0.11	-0.1	0.64	0	-0.03	0.11	0.63	-0.01	-0.22	0.23	-0.07	0.02	0.34	0.01	0.09	-0.11
P13412	Tnni2	Troponin I, fast skeletal muscle OS=Mus musculus OX=10090 GN=Tnni2 PE=2 SV=2	4.93e+18	0	120.391	49	10	3033	0	2	1	9766.32	3033	10	13	>sp|P13412|TNNI2_MOUSE Troponin I, fast skeletal muscle OS=Mus musculus OX=10090 GN=Tnni2 PE=2 SV=2	0.26	0.21	0.12	0.07	0.05	0.25	-0.02	0.06	0	0.04	0.23	0.01	0	-0.23	-0.02	0.15	0	0.2	0.16	-0.32	-0.18	-0.2	-0.19	0.1	0.03	0.18	-0.65	0.01	-0.16	-0.19	-0.05	-0.15	-0.17
Q9DB20	Atp5po	ATP synthase subunit O, mitochondrial OS=Mus musculus OX=10090 GN=Atp5po PE=1 SV=1	-2.82e+18	0	120.31	66	12	464	0	12	1	1663.82	464	12	0	>sp|Q9DB20|ATPO_MOUSE ATP synthase subunit O, mitochondrial OS=Mus musculus OX=10090 GN=Atp5po PE=1 SV=1	-0.46	-0.46	-0.11	0	-0.19	-0.4	0.04	0.1	0.18	0.05	-0.07	-0.1	-0.1	-0.04	0.35	-0.19	-0.17	-0.19	0	-0.07	0.13	0.22	0.07	-0.12	0.23	0.09	-0.07	0.22	-0.32	-0.25	-0.32	-0.2	0.19
Q9CR62	Slc25a11	Mitochondrial 2-oxoglutarate/malate carrier protein OS=Mus musculus OX=10090 GN=Slc25a11 PE=1 SV=3	-5.54e+18	0	120.295	52	14	538	4	14	1	1970.42	538	14	0	>sp|Q9CR62|M2OM_MOUSE Mitochondrial 2-oxoglutarate/malate carrier protein OS=Mus musculus OX=10090 GN=Slc25a11 PE=1 SV=3	-0.21	-0.46	-0.22	-0.29	0.09	-0.13	-0.22	-0.03	-0.3	-0.21	-0.08	-0.47	-0.29	-0.28	-0.11	-0.28	-0.12	-0.13	0.23	-0.41	0.01	-0.08	-0.16	-0.2	0.1	0.03	-0.13	0.06	-0.14	-0.17	-0.14	-0.12	-0.06
Q6ZWX6	Eif2s1	Eukaryotic translation initiation factor 2 subunit 1 OS=Mus musculus OX=10090 GN=Eif2s1 PE=1 SV=3	-7.79e+17	0	120.017	65	19	298	19	19	1	974.46	298	19	0	>sp|Q6ZWX6|IF2A_MOUSE Eukaryotic translation initiation factor 2 subunit 1 OS=Mus musculus OX=10090 GN=Eif2s1 PE=1 SV=3	0.19	0.01	-0.01	0.04	0.03	0.1	0.06	0.06	0.01	0.01	-0.04	0.06	0	-0.01	0.02	0.06	0.01	0.02	-0.08	0.05	0.11	0.04	0.05	0.03	0.02	0.01	0.03	0.12	-0.01	0.05	0.04	-0.02	0.08
Q9DCX2	Atp5pd	ATP synthase subunit d, mitochondrial OS=Mus musculus OX=10090 GN=Atp5pd PE=1 SV=3	-6.46e+18	0	119.838	74	10	803	3	10	1	3198.65	803	10	0	>sp|Q9DCX2|ATP5H_MOUSE ATP synthase subunit d, mitochondrial OS=Mus musculus OX=10090 GN=Atp5pd PE=1 SV=3	-0.57	-0.4	-0.07	0	-0.19	-0.36	0	0.13	0.13	-0.03	0.06	-0.17	-0.05	-0.14	0.27	-0.24	-0.39	-0.19	0.09	-0.09	0.09	0.12	0.01	0.02	0.18	0.11	-0.1	0.16	-0.35	-0.31	-0.46	-0.31	0.07
O88746	Tom1	Target of Myb protein 1 OS=Mus musculus OX=10090 GN=Tom1 PE=1 SV=1	8.97e+17	0	119.795	50	13	147	1	13	1	565.12	147	13	0	>sp|O88746|TOM1_MOUSE Target of Myb protein 1 OS=Mus musculus OX=10090 GN=Tom1 PE=1 SV=1	0.08	0.01	-0.05	-0.02	0.1	0.01	0.07	-0.01	-0.08	-0.1	-0.04	0.02	0.06	0.01	0	0.08	-0.22	0.18	0.08	-0.22	0.17	-0.13	-0.14	0.03	-0.01	0.2	0.09	0.12	-0.04	-0.13	-0.07	-0.01	0.06
P00920	Ca2	Carbonic anhydrase 2 OS=Mus musculus OX=10090 GN=Ca2 PE=1 SV=4	-2.14e+18	0	119.714	71	12	391	6	12	1	1195.76	391	12	0	>sp|P00920|CAH2_MOUSE Carbonic anhydrase 2 OS=Mus musculus OX=10090 GN=Ca2 PE=1 SV=4	-0.71	-0.56	0.31	0.16	-0.42	-0.16	-0.18	0.3	-0.17	-0.28	0.14	-0.27	0.04	0.28	0.3	0.18	0.08	0.57	-0.44	0.47	-0.07	0.02	0.14	-0.15	-0.34	0.07	-0.6	0.29	0	0.14	0	0.23	-0.35
Q99M73	Krt84	Keratin, type II cuticular Hb4 OS=Mus musculus OX=10090 GN=Krt84 PE=2 SV=2	-1.81e+18	0	119.691	40	19	194	16	16	1	739.21	194	19	0	>sp|Q99M73|KRT84_MOUSE Keratin, type II cuticular Hb4 OS=Mus musculus OX=10090 GN=Krt84 PE=2 SV=2	-0.69	0.01	0	0.14	-0.33	1.01	0.39	-0.1	-0.51	-0.09	0.42	1.2	0.32	0.31	0.58	-0.48	-0.36	0.23	-0.06	-0.52	-0.26	-0.42	-0.49	0.25	0.36	-0.5	0.42	0.35	0.62	-0.04	-0.14	-0.47	-0.19
P19783	Cox4i1	Cytochrome c oxidase subunit 4 isoform 1, mitochondrial OS=Mus musculus OX=10090 GN=Cox4i1 PE=1 SV=2	-8.24e+18	0	119.553	57	12	716	6	7	1	2535.42	716	12	8	>sp|P19783|COX41_MOUSE Cytochrome c oxidase subunit 4 isoform 1, mitochondrial OS=Mus musculus OX=10090 GN=Cox4i1 PE=1 SV=2	-0.29	-0.32	-0.03	0.06	0.11	-0.13	0.07	0.07	0.12	0	0.01	-0.28	0.06	0.07	0.42	0.01	-0.03	-0.22	0.1	0.09	0.15	0.03	0.05	-0.01	0.08	0.06	-0.04	0.11	0.22	0.12	0.12	0.09	0.21
Q8BZ52	Fsd2	Fibronectin type III and SPRY domain-containing protein 2 OS=Mus musculus OX=10090 GN=Fsd2 PE=1 SV=3	4.07e+18	0	119.503	38	21	218	21	21	1	704.53	218	21	0	>sp|Q8BZ52|FSD2_MOUSE Fibronectin type III and SPRY domain-containing protein 2 OS=Mus musculus OX=10090 GN=Fsd2 PE=1 SV=3	0.07	0.06	-0.16	-0.24	0.08	-0.05	0.03	-0.01	0.02	-0.02	0.05	-0.18	-0.03	-0.15	-0.15	-0.25	-0.21	0.05	0.18	-0.05	0.02	0.04	-0.02	-0.06	-0.2	0.25	-0.1	0.02	-0.02	-0.23	-0.01	-0.04	-0.06
Q2TPA8	Hsdl2	Hydroxysteroid dehydrogenase-like protein 2 OS=Mus musculus OX=10090 GN=Hsdl2 PE=1 SV=1	-1.37e+18	0	119.49	46	17	174	3	17	1	584.35	174	17	0	>sp|Q2TPA8|HSDL2_MOUSE Hydroxysteroid dehydrogenase-like protein 2 OS=Mus musculus OX=10090 GN=Hsdl2 PE=1 SV=1	-0.39	-0.36	-0.18	-0.04	-0.05	-0.07	0.08	0.14	0.43	-0.04	-0.11	-0.31	0.47	0.44	0.7	0.5	0.07	-0.42	0.01	0.33	0.32	-0.18	-0.19	0.09	0.21	0.04	-0.27	0.24	-0.02	0.5	-0.22	0.31	-0.03
Q8BH61	F13a1	Coagulation factor XIII A chain OS=Mus musculus OX=10090 GN=F13a1 PE=1 SV=3	3.05e+18	0	119.291	33	19	192	19	19	1	659.63	192	19	0	>sp|Q8BH61|F13A_MOUSE Coagulation factor XIII A chain OS=Mus musculus OX=10090 GN=F13a1 PE=1 SV=3	0.01	-0.01	0.03	0.05	-0.07	0.3	-0.41	-0.25	0	-0.17	-0.79	0.21	-0.46	-0.27	-0.21	-0.06	-0.19	-0.27	-0.72	0.6	-0.13	-0.13	-0.16	-0.26	-0.4	0	0.23	-0.35	0.06	0.51	0.09	-0.05	-0.43
Q8BWM0	Ptges2	Prostaglandin E synthase 2 OS=Mus musculus OX=10090 GN=Ptges2 PE=1 SV=3	-2.95e+18	0	118.838	49	14	194	14	14	1	773.14	194	14	0	>sp|Q8BWM0|PGES2_MOUSE Prostaglandin E synthase 2 OS=Mus musculus OX=10090 GN=Ptges2 PE=1 SV=3	-0.14	-0.09	-0.05	0	0.05	-0.32	0.16	-0.29	0.13	0.01	0.09	-0.03	0.23	0.34	0.21	-0.14	0.14	-0.1	-0.03	0.16	0	0	-0.01	-0.11	0.19	-0.21	0.42	0.01	0.04	-0.09	0.05	-0.01	0.13
Q9D1Q6	Erp44	Endoplasmic reticulum resident protein 44 OS=Mus musculus OX=10090 GN=Erp44 PE=1 SV=1	2.71e+18	0	118.698	60	18	231	17	17	1	788.46	231	18	1	>sp|Q9D1Q6|ERP44_MOUSE Endoplasmic reticulum resident protein 44 OS=Mus musculus OX=10090 GN=Erp44 PE=1 SV=1	0.1	0.03	0.01	0.19	-0.05	-0.04	0.01	-0.04	-0.2	-0.03	-0.11	0.18	-0.09	-0.01	0.22	0.03	-0.06	0.1	0	0.13	0	0.11	0.09	-0.06	-0.09	0.07	0.1	-0.02	0.01	-0.02	0.05	-0.09	-0.06
P17426	Ap2a1	AP-2 complex subunit alpha-1 OS=Mus musculus OX=10090 GN=Ap2a1 PE=1 SV=1	8.61e+18	0	118.601	34	27	206	0	18	1	657.81	206	27	9	>sp|P17426|AP2A1_MOUSE AP-2 complex subunit alpha-1 OS=Mus musculus OX=10090 GN=Ap2a1 PE=1 SV=1	0.11	0.08	-0.12	-0.1	-0.07	-0.07	-0.02	-0.15	-0.06	-0.08	-0.1	0.04	0.02	0	-0.07	0.05	-0.01	0.04	0.03	-0.08	-0.12	-0.04	0	-0.04	0.05	-0.03	0.22	-0.16	0.09	0.1	0.06	-0.04	0.13
P99029	Prdx5	Peroxiredoxin-5, mitochondrial OS=Mus musculus OX=10090 GN=Prdx5 PE=1 SV=2	-5.42e+18	0	118.559	60	12	424	0	12	1	1611.26	424	12	0	>sp|P99029|PRDX5_MOUSE Peroxiredoxin-5, mitochondrial OS=Mus musculus OX=10090 GN=Prdx5 PE=1 SV=2	-0.19	-0.05	-0.09	0.07	0.17	-0.06	0	0.15	0.34	0.08	0.12	-0.04	0.04	0.16	0.52	0.19	0.01	-0.05	0.31	0.08	0.11	0.01	-0.06	0.08	0.08	0.23	0.02	0.17	-0.01	0.12	0.01	0.16	0.04
Q9CZD3	Gars	Glycine--tRNA ligase OS=Mus musculus OX=10090 GN=Gars PE=1 SV=1	-1.67e+18	0	118.495	28	18	312	18	18	1	1086.6	312	18	0	>sp|Q9CZD3|GARS_MOUSE Glycine--tRNA ligase OS=Mus musculus OX=10090 GN=Gars PE=1 SV=1	0.27	0.41	0.08	0.1	0.12	0.16	-0.03	0.09	0.03	0.08	0.19	0.06	0.11	0.05	0.12	0.23	0.13	0.01	0	-0.11	0	-0.13	-0.11	0.12	0.14	0.22	-0.32	0	0.14	-0.07	0.12	0.07	0.1
Q9QZE5	Copg1	Coatomer subunit gamma-1 OS=Mus musculus OX=10090 GN=Copg1 PE=1 SV=1	4.92e+18	0	118.411	32	20	146	14	18	1	551.15	146	20	2	>sp|Q9QZE5|COPG1_MOUSE Coatomer subunit gamma-1 OS=Mus musculus OX=10090 GN=Copg1 PE=1 SV=1	0.01	0.5	-0.01	-0.08	0	-0.05	-0.16	-0.19	-0.21	-0.14	-0.06	-0.05	-0.08	-0.19	-0.15	-0.09	0.11	0.04	-0.01	0.06	-0.06	-0.09	-0.1	0.13	-0.09	-0.02	0.08	-0.18	-0.11	-0.04	-0.01	-0.11	0.15
Q8R2P8	Kars	Isoform of Q99MN1, Lysine--tRNA ligase OS=Mus musculus OX=10090 GN=Kars PE=1 SV=1	-3.38e+18	0	118.295	43	21	223	0	21	1	740.7	223	21	0	>tr|Q8R2P8|Q8R2P8_MOUSE Isoform of Q99MN1, Lysine--tRNA ligase OS=Mus musculus OX=10090 GN=Kars PE=1 SV=1	-0.22	-0.07	0.17	0.08	0.04	-0.09	-0.2	0.14	-0.14	-0.12	-0.01	0.04	-0.02	-0.06	-0.1	0.13	0.14	0.02	-0.1	0	0.08	0.06	0.05	-0.02	-0.09	0.02	0.15	0	0.03	0.08	0.17	0.07	0.11
Q3THK7	Gmps	GMP synthase [glutamine-hydrolyzing] OS=Mus musculus OX=10090 GN=Gmps PE=1 SV=2	7.41e+18	0	118.279	40	21	181	21	21	1	722.17	181	21	0	>sp|Q3THK7|GUAA_MOUSE GMP synthase [glutamine-hydrolyzing] OS=Mus musculus OX=10090 GN=Gmps PE=1 SV=2	0.01	-0.03	0.02	0	0.08	0.04	0.01	0.01	0.1	0.15	0.01	0	0.16	0.08	-0.04	0.1	0	-0.02	-0.14	0.19	0.25	-0.08	-0.07	0.03	-0.02	0.11	0.14	-0.06	-0.04	0.1	-0.01	-0.03	-0.04
P14152	Mdh1	Malate dehydrogenase, cytoplasmic OS=Mus musculus OX=10090 GN=Mdh1 PE=1 SV=3	-2.03e+18	0	118.152	40	13	1095	10	13	1	3363.89	1095	13	0	>sp|P14152|MDHC_MOUSE Malate dehydrogenase, cytoplasmic OS=Mus musculus OX=10090 GN=Mdh1 PE=1 SV=3	-0.25	-0.13	-0.06	0.02	0.24	-0.15	0.06	0.22	0.24	0.15	0.02	-0.13	-0.03	0.08	0.27	0.04	0.02	-0.36	-0.12	0.08	0.25	0.15	0.19	-0.09	0.04	0.06	0.05	0.24	0.13	-0.03	0.03	0.1	0.11
P63028	Tpt1	Translationally-controlled tumor protein OS=Mus musculus OX=10090 GN=Tpt1 PE=1 SV=1	-7.39e+18	0	118.061	53	6	243	2	6	1	937.08	243	6	0	>sp|P63028|TCTP_MOUSE Translationally-controlled tumor protein OS=Mus musculus OX=10090 GN=Tpt1 PE=1 SV=1	0.25	0.35	-0.15	-0.19	-0.1	0.04	0.01	-0.19	0.04	0.21	0.11	-0.02	0.08	-0.03	-0.06	0.08	0.14	0.17	0.16	-0.27	-0.21	-0.42	-0.42	0.05	-0.02	-0.22	-0.36	-0.21	-0.21	-0.19	-0.15	-0.09	-0.2
Q9D2G2	Dlst	Dihydrolipoyllysine-residue succinyltransferase component of 2-oxoglutarate dehydrogenase complex, mitochondrial OS=Mus musculus OX=10090 GN=Dlst PE=1 SV=1	-6.27e+17	0	118.019	32	12	397	6	12	1	1413.24	397	12	0	>sp|Q9D2G2|ODO2_MOUSE Dihydrolipoyllysine-residue succinyltransferase component of 2-oxoglutarate dehydrogenase complex, mitochondrial OS=Mus musculus OX=10090 GN=Dlst PE=1 SV=1	-0.15	-0.17	0.03	0.09	0.1	-0.02	0.06	0.11	0.29	0.13	0.01	-0.16	0.05	0.1	0.45	0.26	0.13	-0.16	0.04	0.06	0.19	0.2	0.2	0.09	0.16	0.23	0	0.19	0.14	0.21	0.1	0.26	0.22
P63328	Ppp3ca	Serine/threonine-protein phosphatase 2B catalytic subunit alpha isoform OS=Mus musculus OX=10090 GN=Ppp3ca PE=1 SV=1	-7.07e+17	0	117.983	39	16	311	1	1	1	956.73	311	16	0	>sp|P63328|PP2BA_MOUSE Serine/threonine-protein phosphatase 2B catalytic subunit alpha isoform OS=Mus musculus OX=10090 GN=Ppp3ca PE=1 SV=1	0.12	0.71	NaN	0.3	0.51	0.44	0.07	0.3	NaN	0.1	NaN	-0.09	-0.06	NaN	0.16	0.04	0.09	0.33	0.15	-0.09	0.23	0.03	-0.25	0.06	-0.12	0.64	NaN	0.45	-0.14	0.14	0.13	0.17	0.05
Q91X72	Hpx	Hemopexin OS=Mus musculus OX=10090 GN=Hpx PE=1 SV=2	8.93e+18	0	117.737	49	20	398	14	20	1	1414.69	398	20	0	>sp|Q91X72|HEMO_MOUSE Hemopexin OS=Mus musculus OX=10090 GN=Hpx PE=1 SV=2	0.09	0.13	0.07	0.03	-0.22	-0.18	-0.4	-0.05	-0.08	-0.29	-0.31	0.18	-0.51	-0.22	-0.68	0.03	0.07	-0.24	-0.35	0.5	-0.03	-0.03	0.24	-0.38	-0.29	-0.13	0.56	-0.19	-0.05	0.3	-0.17	0.05	-0.08
Q9DCD0	Pgd	6-phosphogluconate dehydrogenase, decarboxylating OS=Mus musculus OX=10090 GN=Pgd PE=1 SV=3	-4.14e+18	0	117.723	37	15	248	15	15	1	910.46	248	15	0	>sp|Q9DCD0|6PGD_MOUSE 6-phosphogluconate dehydrogenase, decarboxylating OS=Mus musculus OX=10090 GN=Pgd PE=1 SV=3	0.03	0.14	-0.11	0.29	0	0.35	-0.05	-0.04	0.46	-0.07	0.11	0.66	0.66	0.82	0.76	0.85	-0.01	-0.22	-0.17	0.47	0.11	0.31	0.28	0.64	0	-0.01	0.11	-0.14	0.05	0.75	0.05	0.47	0.06
Q9Z0P5-2	Twf2	Isoform of Q9Z0P5, Isoform 2 of Twinfilin-2 OS=Mus musculus OX=10090 GN=Twf2	-3.14e+18	0	117.566	62	18	249	1	15	1	895.41	249	18	3	>sp|Q9Z0P5-2|TWF2_MOUSE Isoform of Q9Z0P5, Isoform 2 of Twinfilin-2 OS=Mus musculus OX=10090 GN=Twf2	-0.06	0.03	0.05	0.09	0.05	0	0.06	0.07	-0.23	-0.09	0.18	0.14	-0.01	-0.01	0.1	-0.02	-0.11	0.08	0.13	-0.19	-0.09	-0.04	0.01	0.12	0.05	0.21	-0.13	-0.05	0.01	0.02	0	0.03	0
P45591	Cfl2	Cofilin-2 OS=Mus musculus OX=10090 GN=Cfl2 PE=1 SV=1	-1.65e+18	0	117.31	66	13	540	6	12	1	1492.2	540	13	1	>sp|P45591|COF2_MOUSE Cofilin-2 OS=Mus musculus OX=10090 GN=Cfl2 PE=1 SV=1	0.1	-0.06	0.25	0.21	0.12	0.15	0.16	-0.02	0.07	0.14	0.21	0.03	-0.05	0	0.16	0.01	0.11	0.05	0.04	0.02	0.26	0.18	0.17	0.11	0.17	0.28	-0.31	0.16	-0.02	-0.09	0.22	0.22	0.07
Q9D0R2	Tars	Threonine--tRNA ligase, cytoplasmic OS=Mus musculus OX=10090 GN=Tars PE=1 SV=2	-4.58e+18	0	117.287	41	25	215	20	24	1	717.69	215	25	1	>sp|Q9D0R2|SYTC_MOUSE Threonine--tRNA ligase, cytoplasmic OS=Mus musculus OX=10090 GN=Tars PE=1 SV=2	-0.13	-0.18	0.04	0.06	-0.01	0.05	0.04	-0.09	-0.05	0.09	-0.02	-0.01	-0.04	-0.17	-0.19	-0.03	0.09	0.14	-0.09	-0.06	0.05	-0.05	-0.11	-0.02	0.07	-0.03	0.29	-0.11	0.02	-0.06	0.15	0.01	0.18
P50516	Atp6v1a	V-type proton ATPase catalytic subunit A OS=Mus musculus OX=10090 GN=Atp6v1a PE=1 SV=2	-4.94e+18	0	117.273	45	21	210	5	21	1	695.99	210	21	0	>sp|P50516|VATA_MOUSE V-type proton ATPase catalytic subunit A OS=Mus musculus OX=10090 GN=Atp6v1a PE=1 SV=2	-0.08	-0.16	-0.02	0.05	0.09	0.16	0.13	0.03	0.15	0.05	-0.04	0.17	0.06	0.15	0.06	0.09	0.07	0.06	0.12	0.16	-0.15	0.06	0.03	0.05	0.03	-0.09	0.01	-0.04	0.17	0.18	0.13	0.13	-0.03
Q60930	Vdac2	Voltage-dependent anion-selective channel protein 2 OS=Mus musculus OX=10090 GN=Vdac2 PE=1 SV=2	6.21e+18	0	117.237	53	12	579	0	12	1	2553.65	579	12	0	>sp|Q60930|VDAC2_MOUSE Voltage-dependent anion-selective channel protein 2 OS=Mus musculus OX=10090 GN=Vdac2 PE=1 SV=2	-0.08	-0.01	-0.07	0.01	0.06	0.03	0.21	0.06	0.28	0.24	0.05	-0.09	-0.01	0.22	0.17	0.09	0.09	0.1	0.17	-0.08	0.06	0.01	0.08	-0.02	0.07	0.18	0.54	0.19	0.05	0.04	0.09	-0.05	0.08
Q8K1Z0	Coq9	Ubiquinone biosynthesis protein COQ9, mitochondrial OS=Mus musculus OX=10090 GN=Coq9 PE=1 SV=1	5.95e+18	0	117.071	37	8	509	1	8	1	1898.68	509	8	0	>sp|Q8K1Z0|COQ9_MOUSE Ubiquinone biosynthesis protein COQ9, mitochondrial OS=Mus musculus OX=10090 GN=Coq9 PE=1 SV=1	-0.25	-0.13	-0.04	0.01	0.07	-0.17	-0.03	0.12	0.15	0.03	0	-0.21	-0.08	-0.09	0.25	0.11	-0.1	-0.15	0.05	-0.07	0.09	0.07	0.12	-0.04	0.09	0.02	-0.15	0.2	-0.02	0.06	-0.09	0.06	0.07
Q6P9R2	Oxsr1	Serine/threonine-protein kinase OSR1 OS=Mus musculus OX=10090 GN=Oxsr1 PE=1 SV=1	-3.45e+16	0	117.047	30	13	225	10	13	1	791.06	225	13	0	>sp|Q6P9R2|OXSR1_MOUSE Serine/threonine-protein kinase OSR1 OS=Mus musculus OX=10090 GN=Oxsr1 PE=1 SV=1	0.17	0.11	0.05	0.11	0.05	-0.02	0.08	0.24	0.23	0.4	0.02	-0.07	-0.05	0.13	-0.19	0.04	-0.19	0.18	0.11	-0.22	0.04	0.06	0.09	-0.18	-0.11	0.01	0.59	0.03	-0.01	-0.08	0.08	0.01	0.09
Q8K310	Matr3	Matrin-3 OS=Mus musculus OX=10090 GN=Matr3 PE=1 SV=1	8.79e+18	0	117.012	31	18	200	0	18	1	640.18	200	18	0	>sp|Q8K310|MATR3_MOUSE Matrin-3 OS=Mus musculus OX=10090 GN=Matr3 PE=1 SV=1	-0.12	0.05	0.06	-0.04	0.07	-0.28	0.15	-0.13	0.16	0.32	0.02	0.16	0.04	0.14	0.07	-0.19	0.01	0	-0.14	0.13	-0.12	0.14	0.17	0.19	0.03	-0.04	0.33	0.01	0.18	0.21	0.01	0.32	0.03
Q99LE6	Abcf2	ATP-binding cassette sub-family F member 2 OS=Mus musculus OX=10090 GN=Abcf2 PE=1 SV=1	1.56e+18	0	116.855	37	21	230	21	21	1	718.6	230	21	0	>sp|Q99LE6|ABCF2_MOUSE ATP-binding cassette sub-family F member 2 OS=Mus musculus OX=10090 GN=Abcf2 PE=1 SV=1	0.1	0.01	0.08	0.03	0.14	0.01	0.14	0.1	-0.01	0.21	0.09	0.03	0.12	-0.07	-0.13	-0.12	0.18	0.11	0.03	-0.02	0.15	0.01	0	-0.01	0.08	-0.05	-0.03	0.01	0.09	0	0.13	0.04	0.21
Q01405	Sec23a	Protein transport protein Sec23A OS=Mus musculus OX=10090 GN=Sec23a PE=1 SV=2	1.8e+18	0	116.595	28	16	164	0	16	1	566.11	164	16	0	>sp|Q01405|SC23A_MOUSE Protein transport protein Sec23A OS=Mus musculus OX=10090 GN=Sec23a PE=1 SV=2	0.18	0.02	-0.06	-0.07	-0.03	-0.25	0.02	0.03	-0.24	-0.31	-0.03	-0.08	-0.19	-0.37	-0.41	-0.19	0.08	0.07	0.05	-0.06	0.08	0.2	-0.17	-0.21	-0.03	0.06	0.04	0.04	0.05	-0.1	-0.12	-0.07	-0.08
P80313	Cct7	T-complex protein 1 subunit eta OS=Mus musculus OX=10090 GN=Cct7 PE=1 SV=1	6.49e+18	0	116.55	40	17	293	2	17	1	967.48	293	17	0	>sp|P80313|TCPH_MOUSE T-complex protein 1 subunit eta OS=Mus musculus OX=10090 GN=Cct7 PE=1 SV=1	0	0.05	0.05	0.12	-0.06	-0.03	0.17	-0.08	0.05	0.1	0.08	0.1	0.03	-0.01	-0.1	-0.02	0.17	0.15	0.08	0.01	0	0	-0.01	0.03	-0.05	0	0.14	-0.18	0.08	0.1	0.19	0.03	0.08
Q924C5	Alpk3	Alpha-protein kinase 3 OS=Mus musculus OX=10090 GN=Alpk3 PE=1 SV=1	-2.11e+16	0	116.444	21	24	111	1	24	1	339.06	111	24	0	>sp|Q924C5|ALPK3_MOUSE Alpha-protein kinase 3 OS=Mus musculus OX=10090 GN=Alpk3 PE=1 SV=1	0.22	0.23	0.11	0.04	0.14	0.53	-0.01	0	-0.5	-0.1	-0.04	-0.1	0.05	0.07	-0.03	-0.16	-0.09	0.04	0.06	-0.13	0.09	0.04	0.16	-0.25	0.18	-0.02	0.61	0.21	0.07	-0.11	0.16	0.01	0.14
Q8K3R3	Plcd4	1-phosphatidylinositol 4,5-bisphosphate phosphodiesterase delta-4 OS=Mus musculus OX=10090 GN=Plcd4 PE=1 SV=2	-4.39e+18	0	116.417	34	19	177	0	19	1	706.22	177	19	0	>sp|Q8K3R3|PLCD4_MOUSE 1-phosphatidylinositol 4,5-bisphosphate phosphodiesterase delta-4 OS=Mus musculus OX=10090 GN=Plcd4 PE=1 SV=2	0.33	0.12	0.11	0.18	0.08	0.15	0.03	0.09	0.02	0.24	-0.07	-0.01	0	-0.15	-0.19	-0.1	0.13	0.33	0.25	-0.34	0.01	-0.27	-0.49	-0.08	-0.05	0.06	-0.5	0	-0.11	-0.12	0.09	0.12	0.18
B2RQS1	Strn3	Isoform of Q9ERG2, Striatin-3 OS=Mus musculus OX=10090 GN=Strn3 PE=1 SV=1	2.62e+18	0	116.274	29	14	126	1	13	1	475.47	126	14	1	>tr|B2RQS1|B2RQS1_MOUSE Isoform of Q9ERG2, Striatin-3 OS=Mus musculus OX=10090 GN=Strn3 PE=1 SV=1	-0.05	0.17	0.09	0.05	0.08	-0.13	-0.01	0.06	-0.07	0.01	0.14	-0.16	-0.08	-0.04	-0.18	-0.08	0.1	-0.33	-0.14	-0.05	0.14	0.06	-0.17	-0.16	0.02	0.03	0.2	-0.01	-0.01	-0.06	0.05	0.04	0.09
Q80X68	Csl	Citrate synthase OS=Mus musculus OX=10090 GN=Csl PE=1 SV=1	8.84e+18	0	116.216	21	8	726	1	1	1	2877.71	726	8	0	>tr|Q80X68|Q80X68_MOUSE Citrate synthase OS=Mus musculus OX=10090 GN=Csl PE=1 SV=1	-0.62	-1.09	NaN	-0.53	-0.69	NaN	-0.44	0.04	-0.43	-0.44	NaN	-0.88	-0.52	NaN	-0.3	-0.3	NaN	-0.16	-0.21	-0.21	-0.07	0.15	NaN	-0.25	-0.06	NaN	NaN	-0.01	-0.05	-0.14	-0.13	-0.02	0.14
Q9DCT2	Ndufs3	NADH dehydrogenase [ubiquinone] iron-sulfur protein 3, mitochondrial OS=Mus musculus OX=10090 GN=Ndufs3 PE=1 SV=2	1.75e+18	0	116.076	48	15	427	15	15	1	1514.83	427	15	0	>sp|Q9DCT2|NDUS3_MOUSE NADH dehydrogenase [ubiquinone] iron-sulfur protein 3, mitochondrial OS=Mus musculus OX=10090 GN=Ndufs3 PE=1 SV=2	-0.18	-0.2	0.08	0.07	0.17	0.01	0.15	-0.05	0.15	0.07	-0.05	-0.27	0.03	0.06	0.12	0.04	0.02	-0.27	0.11	-0.04	0.06	0.04	-0.03	-0.18	0.1	0.18	-0.04	0.01	0.17	-0.07	0.14	0.06	0.18
F6ZDS4	Tpr	Nucleoprotein TPR OS=Mus musculus OX=10090 GN=Tpr PE=1 SV=1	-4.72e+18	0	115.96	13	28	114	0	28	1	364.01	114	28	0	>sp|F6ZDS4|TPR_MOUSE Nucleoprotein TPR OS=Mus musculus OX=10090 GN=Tpr PE=1 SV=1	0.01	0.1	-0.05	0.01	0.05	-0.04	0.01	-0.1	-0.16	-0.11	-0.07	0.56	-0.02	0.34	0.29	0.04	0.08	-0.26	-0.16	0.13	-0.11	-0.04	0.11	0.51	-0.11	-0.07	0.28	-0.05	-0.04	0.02	-0.22	-0.14	-0.07
Q80X50-5	Ubap2l	Isoform of Q80X50, Isoform 5 of Ubiquitin-associated protein 2-like OS=Mus musculus OX=10090 GN=Ubap2l	-5.17e+18	0	115.884	22	16	140	0	16	1	474.02	140	16	0	>sp|Q80X50-5|UBP2L_MOUSE Isoform of Q80X50, Isoform 5 of Ubiquitin-associated protein 2-like OS=Mus musculus OX=10090 GN=Ubap2l	0.01	-0.05	-0.01	0.1	-0.14	-0.09	-0.06	-0.03	0.08	0.02	-0.12	-0.05	0.01	0.05	0.04	-0.01	0.01	0.08	-0.13	0.06	0.04	0.01	0.05	0.07	0.02	-0.04	0.24	-0.06	-0.02	-0.02	-0.01	0.03	-0.18
P63085	Mapk1	Mitogen-activated protein kinase 1 OS=Mus musculus OX=10090 GN=Mapk1 PE=1 SV=3	9.36e+17	0	115.826	64	18	236	6	13	1	761.93	236	18	5	>sp|P63085|MK01_MOUSE Mitogen-activated protein kinase 1 OS=Mus musculus OX=10090 GN=Mapk1 PE=1 SV=3	0.09	0.2	-0.14	-0.19	-0.02	-0.22	-0.02	-0.18	-0.14	-0.04	-0.06	-0.1	-0.27	-0.29	-0.35	-0.2	0.03	0.1	0.02	-0.25	-0.13	0.06	-0.09	-0.17	-0.12	-0.05	-0.1	-0.2	-0.04	-0.35	-0.07	-0.17	0.01
P70170	Abcc9	ATP-binding cassette sub-family C member 9 OS=Mus musculus OX=10090 GN=Abcc9 PE=1 SV=2	4.78e+18	0	115.805	18	21	174	0	21	1	587.48	174	21	0	>sp|P70170|ABCC9_MOUSE ATP-binding cassette sub-family C member 9 OS=Mus musculus OX=10090 GN=Abcc9 PE=1 SV=2	0.42	-0.18	0.17	0.08	0.06	0.25	0.01	0.06	-0.2	-0.04	0.24	0.03	0.14	0.14	0.06	-0.04	0.08	0.33	0.33	-0.15	-0.03	-0.03	-0.09	0.08	0.13	0.34	0.01	0.18	0.02	-0.24	0.08	-0.06	-0.04
Q8BVJ7	Pdlim7	Isoform of Q3TJD7, PDZ and LIM domain 7, isoform CRA_f OS=Mus musculus OX=10090 GN=Pdlim7 PE=1 SV=1	-2.37e+18	0	115.688	62	10	781	0	2	1	3445.19	781	10	10	>tr|Q8BVJ7|Q8BVJ7_MOUSE Isoform of Q3TJD7, PDZ and LIM domain 7, isoform CRA_f OS=Mus musculus OX=10090 GN=Pdlim7 PE=1 SV=1	0.34	0.26	0.15	0.09	0.09	0.15	0.1	0.15	0.01	0.25	0.16	0.03	0.12	0.02	-0.2	0.02	-0.01	0.22	0.21	-0.46	-0.28	-0.12	-0.19	-0.05	-0.07	-0.22	-1.01	0.08	-0.06	-0.16	0.13	-0.02	-0.25
Q04447	Ckb	Creatine kinase B-type OS=Mus musculus OX=10090 GN=Ckb PE=1 SV=1	4.61e+18	0	115.665	61	14	414	13	13	1	1186.23	414	14	0	>sp|Q04447|KCRB_MOUSE Creatine kinase B-type OS=Mus musculus OX=10090 GN=Ckb PE=1 SV=1	-0.08	-0.14	-0.07	-0.06	-0.04	0.12	0	-0.14	0.03	-0.13	-0.08	0.21	-0.12	0.12	-0.11	0.05	-0.05	0.03	0.13	0.07	0.1	-0.2	-0.08	-0.25	-0.1	0.01	0.08	0.11	0.09	-0.11	-0.05	-0.24	-0.07
A0A0G2JEX1	Nexn	Isoform of Q7TPW1, Nexilin OS=Mus musculus OX=10090 GN=Nexn PE=1 SV=1	-6.07e+18	0	115.597	31	21	273	0	9	1	787.52	273	21	13	>tr|A0A0G2JEX1|A0A0G2JEX1_MOUSE Isoform of Q7TPW1, Nexilin OS=Mus musculus OX=10090 GN=Nexn PE=1 SV=1	-0.01	0.13	-0.11	-0.17	-0.15	0.03	-0.14	-0.3	-0.15	-0.13	-0.04	-0.13	0	-0.27	-0.2	0.07	0	0.25	0	-0.07	-0.09	-0.12	-0.06	-0.1	-0.14	-0.1	0.13	-0.17	-0.04	-0.18	-0.01	-0.26	0.07
P62908	Rps3	40S ribosomal protein S3 OS=Mus musculus OX=10090 GN=Rps3 PE=1 SV=1	6.57e+18	0	115.535	67	16	456	5	16	1	1503.68	456	16	0	>sp|P62908|RS3_MOUSE 40S ribosomal protein S3 OS=Mus musculus OX=10090 GN=Rps3 PE=1 SV=1	0.18	0.02	0.03	0.04	-0.07	-0.11	-0.04	-0.09	-0.03	0.02	0.06	0.12	0.08	-0.02	0.06	0.06	0.16	0.19	0	0.13	0.05	-0.05	-0.02	0.2	0.12	0.1	0.09	-0.12	-0.05	0.02	0.05	-0.04	0.07
Q8JZQ9	Eif3b	Eukaryotic translation initiation factor 3 subunit B OS=Mus musculus OX=10090 GN=Eif3b PE=1 SV=1	-5.66e+18	0	115.383	35	21	215	19	21	1	804.08	215	21	0	>sp|Q8JZQ9|EIF3B_MOUSE Eukaryotic translation initiation factor 3 subunit B OS=Mus musculus OX=10090 GN=Eif3b PE=1 SV=1	0.01	0.02	0.09	0.16	-0.04	-0.08	0.01	-0.05	-0.07	-0.03	-0.17	0.02	0.12	0.04	0.11	0.04	0.04	0.13	-0.04	0.14	-0.04	-0.05	-0.01	0.15	-0.06	0.16	-0.06	-0.14	0.01	0.1	0.03	-0.04	0
Q80YV4-2	Pank4	Isoform of Q80YV4, Isoform 2 of Pantothenate kinase 4 OS=Mus musculus OX=10090 GN=Pank4	8.95e+18	0	115.372	32	20	189	1	20	1	643.06	189	20	0	>sp|Q80YV4-2|PANK4_MOUSE Isoform of Q80YV4, Isoform 2 of Pantothenate kinase 4 OS=Mus musculus OX=10090 GN=Pank4	0.11	0.03	0.06	-0.09	-0.19	-0.45	-0.28	-0.2	-0.5	-0.36	0.15	-0.19	-0.19	-0.44	-0.73	-0.19	-0.12	0.1	0.16	-0.15	0.23	0.14	-0.05	-0.2	0.11	0.01	-0.27	-0.22	0.04	-0.24	0.05	-0.06	-0.34
P57776-2	Eef1d	Isoform of P57776, Isoform 2 of Elongation factor 1-delta OS=Mus musculus OX=10090 GN=Eef1d	-5.49e+18	0	115.254	69	15	279	0	2	1	974.32	279	15	0	>sp|P57776-2|EF1D_MOUSE Isoform of P57776, Isoform 2 of Elongation factor 1-delta OS=Mus musculus OX=10090 GN=Eef1d	NaN	NaN	NaN	NaN	NaN	NaN	NaN	NaN	-0.22	-0.6	NaN	NaN	-0.15	NaN	NaN	-0.27	NaN	NaN	NaN	NaN	NaN	0.14	NaN	NaN	NaN	NaN	NaN	NaN	NaN	NaN	NaN	NaN	NaN
Q8BP92	Rcn2	Reticulocalbin-2 OS=Mus musculus OX=10090 GN=Rcn2 PE=1 SV=1	1.16e+18	0	114.92	53	14	163	13	14	1	661.23	163	14	0	>sp|Q8BP92|RCN2_MOUSE Reticulocalbin-2 OS=Mus musculus OX=10090 GN=Rcn2 PE=1 SV=1	0.22	0.28	0.01	0.03	0.11	0.1	-0.23	0.4	-0.17	-0.12	-0.02	0	-0.05	-0.07	0	0.12	-0.13	0.35	0.29	-0.17	-0.07	0.06	0.05	-0.01	-0.07	0.29	-0.19	0.14	-0.07	-0.03	0.01	0.05	0.01
Q8R4E4	Myoz3	Myozenin-3 OS=Mus musculus OX=10090 GN=Myoz3 PE=1 SV=1	2.93e+18	0	114.882	55	11	471	1	11	1	1873.98	471	11	0	>sp|Q8R4E4|MYOZ3_MOUSE Myozenin-3 OS=Mus musculus OX=10090 GN=Myoz3 PE=1 SV=1	0.34	0.41	0.29	0.13	0.18	0.28	-0.08	0.15	0.02	0.07	0.16	-0.3	0.16	0.38	-0.23	0.23	0.16	0.31	0.12	-0.42	-0.33	0.13	0.19	-0.26	-0.31	0.13	-0.09	0.1	0.1	0.07	0.22	0.15	0.14
P14206	Rpsa	40S ribosomal protein SA OS=Mus musculus OX=10090 GN=Rpsa PE=1 SV=4	-7.06e+18	0	114.858	52	12	257	3	12	1	1006.6	257	12	0	>sp|P14206|RSSA_MOUSE 40S ribosomal protein SA OS=Mus musculus OX=10090 GN=Rpsa PE=1 SV=4	-0.03	0.16	-0.04	-0.02	-0.1	-0.06	-0.03	-0.13	-0.11	-0.06	-0.04	0.01	0.06	0.07	-0.01	0.1	0.21	0.05	-0.02	0.06	-0.02	-0.18	-0.18	0.05	0.09	0.19	0.29	-0.18	-0.12	-0.11	0.03	0	-0.01
E9PZF0	Gm20390	Nucleoside diphosphate kinase OS=Mus musculus OX=10090 GN=Gm20390 PE=3 SV=1	1.45e+18	0	114.777	80	15	822	0	6	1	2582.71	822	15	11	>tr|E9PZF0|E9PZF0_MOUSE Nucleoside diphosphate kinase OS=Mus musculus OX=10090 GN=Gm20390 PE=3 SV=1	-0.55	-0.37	0.32	0.32	-0.21	-0.31	0.26	-0.37	0.29	0.37	0.32	0.26	0.17	0.16	0.32	-0.22	-0.32	0.29	0.41	0.17	0.32	0.11	0.07	0.28	0.29	0.33	0.06	0.32	-0.37	-0.4	-0.28	-0.37	0.22
Q91XH5	Spr	Isoform of Q64105, Sepiapterin reductase OS=Mus musculus OX=10090 GN=Spr PE=1 SV=1	2.09e+18	0	114.575	55	11	238	0	11	1	901.66	238	11	0	>tr|Q91XH5|Q91XH5_MOUSE Isoform of Q64105, Sepiapterin reductase OS=Mus musculus OX=10090 GN=Spr PE=1 SV=1	-0.08	0.02	0.07	0.12	-0.11	-0.19	-0.19	-0.01	-0.15	-0.08	0.02	-0.08	-0.02	0.02	-0.06	-0.09	-0.12	0.03	0.08	-0.06	-0.08	-0.01	0.09	-0.02	-0.09	-0.07	-0.05	-0.1	0.12	-0.11	0.16	0.05	0.08
Q9JLV5	Cul3	Cullin-3 OS=Mus musculus OX=10090 GN=Cul3 PE=1 SV=1	-5.92e+18	0	114.481	31	22	217	0	22	1	676.29	217	22	0	>sp|Q9JLV5|CUL3_MOUSE Cullin-3 OS=Mus musculus OX=10090 GN=Cul3 PE=1 SV=1	0.09	0.14	0.16	0.21	-0.14	0.02	-0.02	-0.05	-0.12	0	0.05	0.02	-0.14	-0.23	-0.11	-0.01	-0.08	0.17	0.03	-0.11	0	0.1	0.01	-0.17	-0.12	0.21	-0.4	-0.02	-0.06	-0.1	0.01	-0.08	-0.01
Q9D0E1	Hnrnpm	Heterogeneous nuclear ribonucleoprotein M OS=Mus musculus OX=10090 GN=Hnrnpm PE=1 SV=3	5.7e+18	0	114.446	34	18	187	0	18	1	617.46	187	18	0	>sp|Q9D0E1|HNRPM_MOUSE Heterogeneous nuclear ribonucleoprotein M OS=Mus musculus OX=10090 GN=Hnrnpm PE=1 SV=3	0	0.31	-0.21	0	0.05	0.31	0.08	-0.11	0.18	0.13	-0.06	0.38	0.08	0.36	0.25	0.08	0.24	-0.12	-0.1	0.2	-0.01	0.12	0.03	0.61	0.17	0.16	0.13	0.03	-0.02	0.36	-0.07	0.17	-0.05
Q9D4H8	Cul2	Cullin-2 OS=Mus musculus OX=10090 GN=Cul2 PE=1 SV=2	4.72e+18	0	114.416	31	20	198	2	20	1	662.73	198	20	0	>sp|Q9D4H8|CUL2_MOUSE Cullin-2 OS=Mus musculus OX=10090 GN=Cul2 PE=1 SV=2	-0.03	-0.24	-0.02	-0.09	0.03	-0.23	0.15	0.09	0.05	0.32	0.03	-0.14	-0.07	-0.24	-0.37	-0.03	-0.03	0.03	-0.09	-0.09	0.21	0.05	-0.13	-0.5	-0.09	0.24	0.02	0.15	0.1	-0.19	0.23	-0.03	0.1
Q9DB05	Napa	Alpha-soluble NSF attachment protein OS=Mus musculus OX=10090 GN=Napa PE=1 SV=1	4.81e+18	0	114.392	54	12	175	9	12	1	726.4	175	12	0	>sp|Q9DB05|SNAA_MOUSE Alpha-soluble NSF attachment protein OS=Mus musculus OX=10090 GN=Napa PE=1 SV=1	-0.01	0.01	0.1	0.03	-0.15	-0.19	-0.18	0.02	-0.27	-0.19	-0.05	-0.12	0	-0.12	-0.34	-0.2	0.02	0.18	0.09	-0.07	-0.17	-0.03	0	0.05	-0.08	0.05	-0.04	-0.04	-0.01	-0.13	-0.03	0.03	-0.01
Q3TML0	Pdia6	Isoform of Q922R8, Protein disulfide-isomerase A6 OS=Mus musculus OX=10090 GN=Pdia6 PE=1 SV=1	-9.1e+18	0	114.286	44	15	215	1	1	1	799.79	215	15	14	>tr|Q3TML0|Q3TML0_MOUSE Isoform of Q922R8, Protein disulfide-isomerase A6 OS=Mus musculus OX=10090 GN=Pdia6 PE=1 SV=1	0.22	0.11	0.06	-0.04	-0.06	-0.06	0.19	-0.05	0.27	0.09	0.04	0.18	0	0.08	0.03	0.22	0.03	0.12	0.09	0.04	-0.14	0.07	-0.05	0.24	-0.07	0.09	0.02	-0.13	-0.03	0.18	0.04	0.01	0.06
Q91W50	Csde1	Cold shock domain-containing protein E1 OS=Mus musculus OX=10090 GN=Csde1 PE=1 SV=1	-2.55e+17	0	114.159	30	20	192	0	20	1	629.15	192	20	0	>sp|Q91W50|CSDE1_MOUSE Cold shock domain-containing protein E1 OS=Mus musculus OX=10090 GN=Csde1 PE=1 SV=1	0.04	0.29	-0.04	-0.07	-0.07	-0.07	-0.11	-0.02	-0.05	-0.08	-0.09	-0.1	0.03	-0.17	-0.13	0.17	0.04	-0.08	-0.09	-0.03	0.12	-0.1	-0.07	0.01	-0.03	0.07	-0.02	-0.01	-0.08	-0.09	-0.06	-0.05	-0.05
O35864	Cops5	COP9 signalosome complex subunit 5 OS=Mus musculus OX=10090 GN=Cops5 PE=1 SV=3	2.6e+18	0	114.027	60	14	219	6	14	1	792.33	219	14	0	>sp|O35864|CSN5_MOUSE COP9 signalosome complex subunit 5 OS=Mus musculus OX=10090 GN=Cops5 PE=1 SV=3	0.33	0.56	0.06	0.07	-0.07	0.06	0	-0.09	-0.14	-0.07	0	0.03	-0.02	-0.2	-0.2	0.12	0	0.23	0.12	-0.14	-0.09	-0.05	-0.16	-0.14	-0.01	0.31	-0.22	-0.1	-0.12	-0.35	0.05	-0.15	0.01
P47199	Cryz	Quinone oxidoreductase OS=Mus musculus OX=10090 GN=Cryz PE=1 SV=1	-4.9e+18	0	114.015	60	14	147	2	14	1	575.17	147	14	0	>sp|P47199|QOR_MOUSE Quinone oxidoreductase OS=Mus musculus OX=10090 GN=Cryz PE=1 SV=1	-0.12	0.03	-0.28	-0.17	0.05	0.02	-0.65	0.19	-0.5	-0.5	0.02	-0.08	-0.28	-0.19	-0.05	0.14	-0.04	0.25	0.32	-0.33	-0.2	0.2	0.12	-0.32	-0.34	-0.12	-0.35	0.02	0	0.11	0.01	0.12	-0.26
P24549	Aldh1a1	Retinal dehydrogenase 1 OS=Mus musculus OX=10090 GN=Aldh1a1 PE=1 SV=5	2.35e+18	0	113.972	43	18	207	7	10	1	701.41	207	18	8	>sp|P24549|AL1A1_MOUSE Retinal dehydrogenase 1 OS=Mus musculus OX=10090 GN=Aldh1a1 PE=1 SV=5	-0.44	-0.29	0.3	0.41	0.02	-0.08	0.05	0	0.67	0.3	0.23	0.31	0.2	0.47	0.81	0.24	0	-0.01	-0.35	0.74	0.61	0.34	0.36	0.67	0.57	0.07	0.62	0.08	0.05	0.23	-0.14	0.11	-0.38
O70622-2	Rtn2	Isoform of O70622, Isoform 2 of Reticulon-2 OS=Mus musculus OX=10090 GN=Rtn2	-1.48e+18	0	113.956	52	9	723	2	9	1	3075.81	723	9	0	>sp|O70622-2|RTN2_MOUSE Isoform of O70622, Isoform 2 of Reticulon-2 OS=Mus musculus OX=10090 GN=Rtn2	0.2	0.39	0.06	-0.06	0.08	-0.11	-0.08	0.06	-0.15	0.06	0.18	-0.06	0.02	-0.02	-0.2	-0.22	0.08	0.08	0.07	-0.24	0.04	0.05	0.11	0.07	0.06	-0.06	0.22	0.12	-0.01	-0.22	0.14	0.06	-0.05
Q7TMG8	Nipsnap2	Isoform of O55126, Glioblastoma amplified sequence OS=Mus musculus OX=10090 GN=Nipsnap2 PE=1 SV=1	-3.65e+18	0	113.866	49	10	327	1	10	1	1197.17	327	10	0	>tr|Q7TMG8|Q7TMG8_MOUSE Isoform of O55126, Glioblastoma amplified sequence OS=Mus musculus OX=10090 GN=Nipsnap2 PE=1 SV=1	-0.16	0.18	0	-0.1	0.13	0.04	0.07	0.14	-0.05	0.02	0.22	-0.13	-0.12	0.05	0.14	-0.06	0.09	0.1	0.28	-0.11	-0.02	-0.02	-0.12	-0.02	0.19	0.14	-0.01	0.15	0.05	-0.15	0.12	0.31	0.1
Q9EPU0	Upf1	Regulator of nonsense transcripts 1 OS=Mus musculus OX=10090 GN=Upf1 PE=1 SV=2	-6.78e+18	0	113.675	27	22	153	0	22	1	508.78	153	22	0	>sp|Q9EPU0|RENT1_MOUSE Regulator of nonsense transcripts 1 OS=Mus musculus OX=10090 GN=Upf1 PE=1 SV=2	0.03	0	0.11	0.09	0.07	0	0.12	-0.03	-0.13	0.05	-0.04	0.04	0.04	0.07	0.11	-0.19	0.03	0.08	0.12	0.22	0.15	-0.1	0.06	0.13	-0.01	-0.02	0.02	-0.06	0.04	0.09	0.16	0	0.01
Q9CQA3	Sdhb	Succinate dehydrogenase [ubiquinone] iron-sulfur subunit, mitochondrial OS=Mus musculus OX=10090 GN=Sdhb PE=1 SV=1	-7.45e+18	0	113.655	45	15	409	15	15	1	1230.2	409	15	0	>sp|Q9CQA3|SDHB_MOUSE Succinate dehydrogenase [ubiquinone] iron-sulfur subunit, mitochondrial OS=Mus musculus OX=10090 GN=Sdhb PE=1 SV=1	-0.24	-0.16	-0.15	-0.05	0.03	-0.25	0.03	-0.03	0.09	0.04	-0.03	-0.26	-0.08	-0.03	0.21	0.05	-0.09	-0.18	0.1	-0.11	0.05	0.04	-0.02	-0.17	0.09	-0.01	-0.1	0.09	-0.1	-0.01	-0.05	0.17	0.1
Q8BX70	Vps13c	Vacuolar protein sorting-associated protein 13C OS=Mus musculus OX=10090 GN=Vps13c PE=1 SV=2	1.8e+18	0	113.63	11	26	127	0	26	1	392.22	127	26	0	>sp|Q8BX70|VP13C_MOUSE Vacuolar protein sorting-associated protein 13C OS=Mus musculus OX=10090 GN=Vps13c PE=1 SV=2	-0.09	0.13	0.14	0.11	0.11	0.07	0.33	0.04	0.42	0.15	0.1	0.09	0.42	0.37	0.42	0.52	0.07	0.01	-0.13	0.22	-0.07	0.1	-0.13	0.37	-0.05	0.06	0.12	-0.01	0.22	0.3	0.11	0.17	0.03
Q9WTX6	Cul1	Cullin-1 OS=Mus musculus OX=10090 GN=Cul1 PE=1 SV=1	-4.2e+18	0	113.529	29	18	179	1	18	1	602.84	179	18	0	>sp|Q9WTX6|CUL1_MOUSE Cullin-1 OS=Mus musculus OX=10090 GN=Cul1 PE=1 SV=1	0.18	0.11	0.04	-0.05	-0.06	-0.06	-0.01	0.05	-0.04	0.14	0.11	-0.02	-0.04	-0.08	-0.11	0.02	-0.02	0.1	0.03	-0.25	-0.02	-0.08	-0.19	-0.09	0.07	0.17	0.05	0.01	-0.03	-0.06	-0.07	-0.09	-0.05
B1AX58	Pls3	Isoform of Q99K51, Plastin-3 OS=Mus musculus OX=10090 GN=Pls3 PE=1 SV=1	-1.92e+18	0	113.517	39	21	151	0	17	1	495.98	151	21	4	>tr|B1AX58|B1AX58_MOUSE Isoform of Q99K51, Plastin-3 OS=Mus musculus OX=10090 GN=Pls3 PE=1 SV=1	-0.12	0.17	-0.14	-0.21	-0.18	0.11	-0.22	-0.3	0.01	-0.32	-0.19	0.15	-0.07	0.25	-0.13	0.1	-0.11	-0.13	-0.22	0.27	-0.01	-0.24	-0.75	0.54	0.06	0.03	0.13	-0.09	-0.01	0.29	-0.12	0.05	-0.14
Q921K2	Parp1	Isoform of P11103, Poly [ADP-ribose] polymerase OS=Mus musculus OX=10090 GN=Parp1 PE=1 SV=1	9.14e+18	0	113.305	25	20	156	5	20	1	538.36	156	20	0	>tr|Q921K2|Q921K2_MOUSE Isoform of P11103, Poly [ADP-ribose] polymerase OS=Mus musculus OX=10090 GN=Parp1 PE=1 SV=1	0.05	0.02	0.08	0.01	-0.04	0.01	0.28	0.04	0.02	0.11	0.06	0.1	0.14	0.15	0.12	-0.01	0.16	-0.01	-0.05	0.2	0.11	0.01	-0.05	0.67	0.04	-0.13	0	0.14	0.49	0.33	0.09	0.11	-0.01
A0A1B0GRP7	Plpbp	Isoform of Q9Z2Y8, Pyridoxal phosphate homeostasis protein (Fragment) OS=Mus musculus OX=10090 GN=Plpbp PE=1 SV=1	-2.29e+18	0	113.279	47	12	185	0	12	1	554.11	185	12	0	>tr|A0A1B0GRP7|A0A1B0GRP7_MOUSE Isoform of Q9Z2Y8, Pyridoxal phosphate homeostasis protein (Fragment) OS=Mus musculus OX=10090 GN=Plpbp PE=1 SV=1	0.06	0.14	0.22	0.34	0.28	0.29	0.02	0.16	0.25	0.06	0.29	0.25	0.14	0.24	0.58	0.25	0.15	0.18	0.11	0.1	0.11	0.09	-0.03	0.44	0.2	0.5	0.06	0.12	0.09	0.06	0.12	0.18	0.1
Q8K0E8	Fgb	Fibrinogen beta chain OS=Mus musculus OX=10090 GN=Fgb PE=1 SV=1	5.87e+18	0	113.144	46	15	238	15	15	1	934.35	238	15	0	>sp|Q8K0E8|FIBB_MOUSE Fibrinogen beta chain OS=Mus musculus OX=10090 GN=Fgb PE=1 SV=1	-0.2	0.01	-0.02	-0.11	-0.26	-0.17	-0.21	-0.31	-0.11	-0.34	-0.28	0.04	-0.51	-0.23	-0.16	-0.01	-0.02	-0.02	-0.5	0.63	-0.16	-0.17	-0.12	0.03	-0.24	-0.18	0.25	-0.21	-0.05	0.33	-0.16	0.03	-0.31
Q9JHW2	Nit2	Omega-amidase NIT2 OS=Mus musculus OX=10090 GN=Nit2 PE=1 SV=1	4.94e+18	0	112.791	78	15	217	4	15	1	816.45	217	15	0	>sp|Q9JHW2|NIT2_MOUSE Omega-amidase NIT2 OS=Mus musculus OX=10090 GN=Nit2 PE=1 SV=1	0.03	-0.08	0.21	0.13	0.18	0.35	0.05	0.11	0.03	0.13	0.22	0.11	0.16	0.02	0.18	0.22	0.06	0.15	0.12	-0.09	-0.01	-0.09	-0.14	0.04	0.06	0.16	-0.51	0.08	0.08	0.01	0.16	0.17	0.07
Q02819	Nucb1	Nucleobindin-1 OS=Mus musculus OX=10090 GN=Nucb1 PE=1 SV=2	-4.87e+18	0	112.789	49	17	150	0	17	1	501.94	150	17	0	>sp|Q02819|NUCB1_MOUSE Nucleobindin-1 OS=Mus musculus OX=10090 GN=Nucb1 PE=1 SV=2	0.04	0.09	0.1	0.12	-0.02	0.07	0.02	0.02	0.11	-0.04	-0.07	0.17	0.05	0.12	0.28	-0.01	0.03	0.03	-0.08	0.2	-0.05	0.09	0.18	0.16	-0.04	0.05	0.21	0	0.06	0.08	0.03	0	0.03
Q8BTS0	Ddx5	Isoform of Q61656, DEAD (Asp-Glu-Ala-Asp) box polypeptide 5 OS=Mus musculus OX=10090 GN=Ddx5 PE=1 SV=1	5.79e+18	0	112.746	41	21	216	0	16	1	664.16	216	21	4	>tr|Q8BTS0|Q8BTS0_MOUSE Isoform of Q61656, DEAD (Asp-Glu-Ala-Asp) box polypeptide 5 OS=Mus musculus OX=10090 GN=Ddx5 PE=1 SV=1	0.12	0.24	-0.06	0.03	0.13	0.14	0.03	-0.22	0.2	0.13	0.04	0.26	0.23	0.45	0.24	0.02	0.25	-0.03	-0.17	0.33	-0.15	0.08	-0.06	0.59	0.23	0.34	0.21	-0.06	0.14	0.25	-0.03	0.11	-0.1
Q9D819	Ppa1	Inorganic pyrophosphatase OS=Mus musculus OX=10090 GN=Ppa1 PE=1 SV=1	8.53e+18	0	112.554	67	16	257	16	16	1	897.31	257	16	0	>sp|Q9D819|IPYR_MOUSE Inorganic pyrophosphatase OS=Mus musculus OX=10090 GN=Ppa1 PE=1 SV=1	-0.08	-0.09	-0.06	0	0.01	0.21	0.08	0.09	0.24	0.04	0	0.04	0.1	0.06	0.14	0.24	-0.07	-0.05	-0.03	0.17	0	0.27	0.03	-0.04	-0.14	-0.02	0.01	0.04	-0.01	0.2	-0.01	0.18	-0.04
P05132	Prkaca	cAMP-dependent protein kinase catalytic subunit alpha OS=Mus musculus OX=10090 GN=Prkaca PE=1 SV=3	2.25e+18	0	112.456	41	14	241	2	7	1	873.43	241	14	0	>sp|P05132|KAPCA_MOUSE cAMP-dependent protein kinase catalytic subunit alpha OS=Mus musculus OX=10090 GN=Prkaca PE=1 SV=3	0.07	0.01	-0.13	-0.02	-0.07	-0.26	0	0.16	-1.85	0.11	-0.05	-0.05	-0.18	-0.19	-0.06	-0.07	-0.05	-0.12	-0.24	-0.02	0.11	0.03	-0.04	-0.59	0.13	0.06	-0.09	0.08	0.21	-0.08	0.24	0.24	-0.03
Q9QWL7	Krt17	Keratin, type I cytoskeletal 17 OS=Mus musculus OX=10090 GN=Krt17 PE=1 SV=3	8.08e+18	0	112.423	48	21	252	10	11	1	794.55	252	21	1	>sp|Q9QWL7|K1C17_MOUSE Keratin, type I cytoskeletal 17 OS=Mus musculus OX=10090 GN=Krt17 PE=1 SV=3	-0.97	-0.3	-0.09	0.24	-0.21	1.14	0.5	-0.34	-0.42	-0.33	0.53	1.56	0.72	0.46	0.82	-0.43	-0.01	-0.44	-0.96	2.35	-0.18	-1.19	-1.01	0.95	0.7	-0.33	0.19	0.49	0.63	0.01	0.12	-0.47	-0.36
P32261	Serpinc1	Antithrombin-III OS=Mus musculus OX=10090 GN=Serpinc1 PE=1 SV=1	8.2e+18	0	112.369	37	14	302	9	14	1	1206.13	302	14	0	>sp|P32261|ANT3_MOUSE Antithrombin-III OS=Mus musculus OX=10090 GN=Serpinc1 PE=1 SV=1	-0.02	0.08	-0.08	0.11	-0.29	-0.15	-0.17	-0.35	0.14	-0.01	0.16	0.38	-0.26	-0.09	0.31	0.24	-0.17	0.03	0.18	0.17	-0.15	0.16	0.09	0.15	-0.14	0.06	-0.04	-0.05	-0.35	0.05	-0.21	-0.07	-0.18
P68040	Rack1	Receptor of activated protein C kinase 1 OS=Mus musculus OX=10090 GN=Rack1 PE=1 SV=3	7.51e+18	0	112.178	73	16	279	16	16	1	970.66	279	16	0	>sp|P68040|RACK1_MOUSE Receptor of activated protein C kinase 1 OS=Mus musculus OX=10090 GN=Rack1 PE=1 SV=3	0.12	0.13	0.04	0.01	-0.07	-0.01	0.05	-0.16	-0.07	0	0.06	0.06	0.03	-0.07	0.07	0.06	0.22	0.12	-0.02	0.14	0.02	-0.03	0.03	0.08	0.2	0.14	0.02	-0.17	0.05	-0.05	0.12	-0.04	0.05
O35639	Anxa3	Annexin A3 OS=Mus musculus OX=10090 GN=Anxa3 PE=1 SV=4	-8.82e+18	0	112.078	57	16	281	6	14	1	871.64	281	16	0	>sp|O35639|ANXA3_MOUSE Annexin A3 OS=Mus musculus OX=10090 GN=Anxa3 PE=1 SV=4	-0.28	-0.23	0	0.15	-0.04	0.04	0.04	-0.01	0.17	-0.07	-0.04	0.33	-0.18	0.09	-0.03	-0.01	-0.07	0.04	-0.09	0.24	0	0.11	0.21	-0.03	-0.17	-0.04	0.19	-0.07	0.03	0.16	0.12	0.05	0
Q62087	Pon3	Serum paraoxonase/lactonase 3 OS=Mus musculus OX=10090 GN=Pon3 PE=1 SV=2	-2.81e+18	0	111.944	62	12	162	9	12	1	551.2	162	12	0	>sp|Q62087|PON3_MOUSE Serum paraoxonase/lactonase 3 OS=Mus musculus OX=10090 GN=Pon3 PE=1 SV=2	0.18	0.19	-0.18	-0.01	0.01	0.07	-0.38	0.45	-0.01	-0.21	-0.23	-0.15	0.01	-0.05	-0.03	0.14	-0.3	0.28	0.37	-0.09	0	-0.02	0.09	-0.34	-0.44	-0.08	0.14	0.15	-2.53	-2.24	-2.79	-2.13	-0.1
P63242	Eif5a	Eukaryotic translation initiation factor 5A-1 OS=Mus musculus OX=10090 GN=Eif5a PE=1 SV=2	2.2e+18	0	111.942	69	12	589	0	12	1	2545.42	589	12	0	>sp|P63242|IF5A1_MOUSE Eukaryotic translation initiation factor 5A-1 OS=Mus musculus OX=10090 GN=Eif5a PE=1 SV=2	0.29	0.23	0.2	0.05	0.08	0.23	0.08	-0.08	0.08	0.12	0.18	0.1	0.09	0.08	0.05	0.12	0.15	0.1	0.11	-0.16	-0.18	-0.09	-0.17	0.28	0.17	0.16	-0.24	0.07	-0.03	-0.03	0.09	0.08	0.03
Q8CI12	Smtnl2	Smoothelin-like protein 2 OS=Mus musculus OX=10090 GN=Smtnl2 PE=1 SV=1	-4.2e+18	0	111.84	37	12	231	2	12	1	719.71	231	12	0	>sp|Q8CI12|SMTL2_MOUSE Smoothelin-like protein 2 OS=Mus musculus OX=10090 GN=Smtnl2 PE=1 SV=1	-0.02	-0.15	0.13	-0.02	0	-0.14	-0.03	0	-0.21	-0.24	-0.3	-0.32	-0.23	-0.14	-0.53	-0.29	-0.01	-0.1	-0.24	-0.01	-0.06	0	0.1	-0.48	-0.34	-0.25	0.5	0.05	0.66	0.03	0.3	0.14	0.51
Q8BUK6	Hook3	Protein Hook homolog 3 OS=Mus musculus OX=10090 GN=Hook3 PE=1 SV=2	7.08e+18	0	111.818	28	16	163	10	16	1	570.77	163	16	0	>sp|Q8BUK6|HOOK3_MOUSE Protein Hook homolog 3 OS=Mus musculus OX=10090 GN=Hook3 PE=1 SV=2	0.03	-0.12	-0.02	-0.07	-0.15	-0.15	-0.2	-0.1	-0.23	-0.07	-0.1	-0.21	-0.2	-0.25	-0.17	-0.05	-0.1	-0.01	0.06	-0.1	-0.03	0.15	-0.17	-0.12	-0.04	-0.12	-0.23	-0.16	-0.11	-0.14	-0.12	-0.14	0.1
Q8K0D5	Gfm1	Elongation factor G, mitochondrial OS=Mus musculus OX=10090 GN=Gfm1 PE=1 SV=1	-3.69e+18	0	111.772	32	19	208	19	19	1	629.62	208	19	0	>sp|Q8K0D5|EFGM_MOUSE Elongation factor G, mitochondrial OS=Mus musculus OX=10090 GN=Gfm1 PE=1 SV=1	-0.26	-0.27	0	0.07	0.14	-0.12	-0.08	0.09	-0.01	0.01	0.03	-0.15	0.04	0.06	0.15	0.08	-0.16	-0.01	0.01	0.1	0.25	-0.04	0.05	-0.12	0.04	-0.02	-0.16	0.05	-0.05	0	0.02	0.03	0.11
Q8K0L0	Asb2	Ankyrin repeat and SOCS box protein 2 OS=Mus musculus OX=10090 GN=Asb2 PE=1 SV=1	-7.08e+17	0	111.676	47	19	119	2	19	1	400.78	119	19	0	>sp|Q8K0L0|ASB2_MOUSE Ankyrin repeat and SOCS box protein 2 OS=Mus musculus OX=10090 GN=Asb2 PE=1 SV=1	0.12	-0.04	0.13	0.16	0.02	-0.07	0.16	-0.12	-0.12	-0.02	0.06	-0.03	0.05	0.06	-0.21	0.1	0.22	-0.08	-0.16	-0.28	-0.01	-0.09	0.13	-0.33	-0.33	0.26	0.09	0	0.21	-0.1	0.23	-0.08	0.08
Q9JJW5	Myoz2	Myozenin-2 OS=Mus musculus OX=10090 GN=Myoz2 PE=1 SV=1	-1.78e+18	0	111.583	73	15	374	13	15	1	1186.81	374	15	0	>sp|Q9JJW5|MYOZ2_MOUSE Myozenin-2 OS=Mus musculus OX=10090 GN=Myoz2 PE=1 SV=1	-1.07	-0.56	-0.42	-0.13	0.26	-0.55	0.11	0	-0.05	-0.13	-0.14	-0.55	-0.25	0.03	0.51	-0.18	-0.33	-1.24	-0.86	-0.06	0.09	0.02	0.23	-0.75	0.33	-0.19	0.18	0.19	-0.14	-0.24	-0.39	0	0.31
F8WGM8	Actg1	Isoform of P63260, Actin, cytoplasmic 2 (Fragment) OS=Mus musculus OX=10090 GN=Actg1 PE=1 SV=1	1.72e+18	0	111.398	83	7	3143	1	1	1	8895.36	3143	7	0	>tr|F8WGM8|F8WGM8_MOUSE Isoform of P63260, Actin, cytoplasmic 2 (Fragment) OS=Mus musculus OX=10090 GN=Actg1 PE=1 SV=1	NaN	NaN	0.33	NaN	NaN	NaN	NaN	NaN	NaN	NaN	0.02	NaN	NaN	1	NaN	NaN	NaN	NaN	NaN	NaN	NaN	NaN	NaN	NaN	NaN	NaN	0.45	NaN	NaN	NaN	NaN	NaN	NaN
P60335	Pcbp1	Poly(rC)-binding protein 1 OS=Mus musculus OX=10090 GN=Pcbp1 PE=1 SV=1	4.8e+17	0	110.907	58	14	241	9	9	1	783.25	241	14	7	>sp|P60335|PCBP1_MOUSE Poly(rC)-binding protein 1 OS=Mus musculus OX=10090 GN=Pcbp1 PE=1 SV=1	0.11	0.1	-0.06	0	0.12	0.05	0.15	0.05	0.17	0.19	0.07	0.22	0.14	0.2	0	-0.02	0.21	0.27	0.11	-0.01	-0.17	0.1	0.09	0.12	0.01	0	0.27	0.04	0.09	0.15	0.12	0.14	0.03
Q9CXI0	Coq5	2-methoxy-6-polyprenyl-1,4-benzoquinol methylase, mitochondrial OS=Mus musculus OX=10090 GN=Coq5 PE=1 SV=2	-7.46e+18	0	110.892	53	15	168	11	15	1	713.94	168	15	0	>sp|Q9CXI0|COQ5_MOUSE 2-methoxy-6-polyprenyl-1,4-benzoquinol methylase, mitochondrial OS=Mus musculus OX=10090 GN=Coq5 PE=1 SV=2	-0.19	-0.03	-0.01	-0.05	0.01	-0.14	-0.02	0.05	0	0.08	-0.07	-0.29	-0.64	-0.37	-0.18	-0.28	-0.25	-0.12	0.14	-0.18	-0.03	0.1	0.06	-0.12	0.06	0.1	-0.18	-0.05	-0.03	0	-0.17	-0.07	0.1
Q3TJD7	Pdlim7	PDZ and LIM domain protein 7 OS=Mus musculus OX=10090 GN=Pdlim7 PE=1 SV=1	5.64e+18	0	110.825	28	9	711	1	1	1	3308.75	711	9	0	>sp|Q3TJD7|PDLI7_MOUSE PDZ and LIM domain protein 7 OS=Mus musculus OX=10090 GN=Pdlim7 PE=1 SV=1	NaN	NaN	NaN	NaN	NaN	NaN	NaN	NaN	NaN	NaN	NaN	NaN	NaN	NaN	NaN	NaN	NaN	NaN	NaN	NaN	NaN	NaN	NaN	NaN	NaN	NaN	NaN	NaN	NaN	NaN	NaN	NaN	-0.23
Q9Z2Y3-2	Homer1	Isoform of Q9Z2Y3, Isoform 2 of Homer protein homolog 1 OS=Mus musculus OX=10090 GN=Homer1	-4.46e+18	0	110.703	61	17	190	0	1	1	610.9	190	17	0	>sp|Q9Z2Y3-2|HOME1_MOUSE Isoform of Q9Z2Y3, Isoform 2 of Homer protein homolog 1 OS=Mus musculus OX=10090 GN=Homer1	-0.98	-0.98	-0.34	-0.13	-0.49	NaN	-0.18	-0.11	-0.53	NaN	-0.52	-0.77	-0.36	-0.45	-0.6	0.04	0.2	-0.11	-0.16	-0.09	0.16	0.08	0.34	-1.04	-0.62	-1.14	0.51	-0.52	-0.32	-0.47	-0.29	-0.39	-0.17
Q8R010	Aimp2	Aminoacyl tRNA synthase complex-interacting multifunctional protein 2 OS=Mus musculus OX=10090 GN=Aimp2 PE=1 SV=2	-1.65e+18	0	110.53	50	10	178	1	10	1	687.57	178	10	0	>sp|Q8R010|AIMP2_MOUSE Aminoacyl tRNA synthase complex-interacting multifunctional protein 2 OS=Mus musculus OX=10090 GN=Aimp2 PE=1 SV=2	0	-0.14	0	-0.05	-0.1	-0.32	-0.11	-0.04	-0.26	0.04	-0.19	-0.18	-0.21	-0.27	-0.53	-0.2	0.24	0.07	0.04	-0.31	-0.05	0.11	0.16	-0.42	-0.05	0.1	0.33	-0.08	0.13	-0.09	0.32	0.06	0.27
P61222	Abce1	ATP-binding cassette sub-family E member 1 OS=Mus musculus OX=10090 GN=Abce1 PE=1 SV=1	4.8e+17	0	110.432	33	17	256	17	17	1	925.65	256	17	0	>sp|P61222|ABCE1_MOUSE ATP-binding cassette sub-family E member 1 OS=Mus musculus OX=10090 GN=Abce1 PE=1 SV=1	0.14	0.05	0.08	0.01	0.04	-0.12	0.02	-0.12	-0.21	-0.07	0.12	-0.07	0.06	-0.11	-0.21	0.17	0.17	0.1	0.05	-0.09	0.16	0.02	-0.35	-0.09	0.15	0.25	-0.02	0.1	-0.05	-0.13	-0.02	-0.05	0.16
E9Q7G0	Numa1	Nuclear mitotic apparatus protein 1 OS=Mus musculus OX=10090 GN=Numa1 PE=1 SV=1	-3.6e+18	0	110.412	14	21	108	3	14	1	423.37	108	21	7	>sp|E9Q7G0|NUMA1_MOUSE Nuclear mitotic apparatus protein 1 OS=Mus musculus OX=10090 GN=Numa1 PE=1 SV=1	-0.01	0.13	-0.08	-0.09	-0.09	0.13	0.03	-0.06	-0.03	-0.03	-0.13	0.35	0.04	0.28	0.06	-0.07	0.09	-0.28	-0.1	0.25	-0.06	-0.2	-0.52	0.34	-0.04	-0.03	0.44	0	0.02	0.09	-0.05	0.07	-0.17
Q3UE92	Xpnpep1	Isoform of Q6P1B1, X-prolyl aminopeptidase (Aminopeptidase P) 1, soluble, isoform CRA_b OS=Mus musculus OX=10090 GN=Xpnpep1 PE=1 SV=1	-8.62e+18	0	110.407	40	18	203	0	18	1	725.83	203	18	0	>tr|Q3UE92|Q3UE92_MOUSE Isoform of Q6P1B1, X-prolyl aminopeptidase (Aminopeptidase P) 1, soluble, isoform CRA_b OS=Mus musculus OX=10090 GN=Xpnpep1 PE=1 SV=1	0.26	0.15	0.06	0	-0.17	-0.22	0.25	-0.02	0.06	0.14	-0.2	-0.15	-0.13	-0.26	-0.11	0.1	0.09	0.01	0.07	0.09	0	-0.01	0.01	0.21	0.25	-0.15	0.02	-0.11	0.06	-0.11	0.11	0.06	0.21
Q99L88	Sntb1	Beta-1-syntrophin OS=Mus musculus OX=10090 GN=Sntb1 PE=1 SV=4	-4.83e+18	0	110.058	49	20	248	12	19	1	827.85	248	20	1	>sp|Q99L88|SNTB1_MOUSE Beta-1-syntrophin OS=Mus musculus OX=10090 GN=Sntb1 PE=1 SV=4	0.2	0.12	0.13	0.02	0.53	0.48	0.73	-0.17	0.59	0.87	0.22	-0.14	0.48	0.45	0.47	-0.11	0.01	-0.01	0.03	0.1	0.43	0.02	0.01	0.82	0.86	0.08	-0.25	0.46	0.19	0.13	0.19	0.29	-0.12
Q149B8	Perm1	PGC-1 and ERR-induced regulator in muscle protein 1 OS=Mus musculus OX=10090 GN=Perm1 PE=1 SV=2	-1.52e+18	0	110.047	29	12	139	12	12	1	526.78	139	12	0	>sp|Q149B8|PERM1_MOUSE PGC-1 and ERR-induced regulator in muscle protein 1 OS=Mus musculus OX=10090 GN=Perm1 PE=1 SV=2	-0.57	-0.66	-0.3	-0.12	0.11	-0.71	-0.24	0.18	-0.12	-0.18	-0.14	-0.18	-0.26	-0.32	-0.02	-0.3	-0.14	-0.38	-0.23	0.1	0.3	0.09	0.17	-0.57	0	-0.2	0.15	0.11	0.02	-0.04	-0.24	-0.07	0.28
P32921	Wars	Tryptophan--tRNA ligase, cytoplasmic OS=Mus musculus OX=10090 GN=Wars PE=1 SV=2	2.21e+18	0	110.019	48	18	226	0	18	1	743.66	226	18	0	>sp|P32921|SYWC_MOUSE Tryptophan--tRNA ligase, cytoplasmic OS=Mus musculus OX=10090 GN=Wars PE=1 SV=2	-0.05	-0.34	0.13	0.16	-0.01	-0.14	0.04	0.31	-0.01	-0.13	0.14	0.16	-0.01	0.21	-0.09	0.12	0.14	0.11	0.14	0.11	0.06	0.07	0.03	-0.11	-0.05	0.02	0.69	0.01	0.02	0.02	-0.02	0.06	0.2
P61202-2	Cops2	Isoform of P61202, Isoform 2 of COP9 signalosome complex subunit 2 OS=Mus musculus OX=10090 GN=Cops2	5.89e+18	0	109.833	42	15	232	0	15	1	778.86	232	15	0	>sp|P61202-2|CSN2_MOUSE Isoform of P61202, Isoform 2 of COP9 signalosome complex subunit 2 OS=Mus musculus OX=10090 GN=Cops2	0.05	0.16	0.08	0.04	0.01	-0.11	-0.13	0.08	-0.16	-0.03	-0.01	-0.05	-0.03	-0.12	-0.26	-0.07	-0.13	0.15	0.03	-0.18	0.03	-0.05	0.04	-0.27	-0.21	-0.08	-0.23	0.01	-0.08	-0.22	-0.04	-0.09	0.13
Q9Z2Y3	Homer1	Homer protein homolog 1 OS=Mus musculus OX=10090 GN=Homer1 PE=1 SV=2	-3.59e+18	0	109.754	65	18	185	0	2	1	564.66	185	18	16	>sp|Q9Z2Y3|HOME1_MOUSE Homer protein homolog 1 OS=Mus musculus OX=10090 GN=Homer1 PE=1 SV=2	0.12	-0.04	-0.13	-0.21	-0.06	-0.12	-0.05	0.19	-0.15	0	-0.04	-0.2	-0.07	-0.09	-0.25	-0.16	-0.18	0.31	0.1	-0.18	0.04	0.02	0.13	-0.23	-0.08	-0.03	0.42	-0.06	-0.06	-0.1	-0.03	-0.02	-0.07
Q9QZF2	Gpc1	Glypican-1 OS=Mus musculus OX=10090 GN=Gpc1 PE=1 SV=1	7e+18	0	109.71	42	15	151	15	15	1	530.99	151	15	0	>sp|Q9QZF2|GPC1_MOUSE Glypican-1 OS=Mus musculus OX=10090 GN=Gpc1 PE=1 SV=1	0.18	0.13	0	0	-0.03	-0.31	-0.13	-0.01	-0.24	0.06	0.1	-0.11	0.09	-0.09	-0.1	-0.23	0.05	0.34	0.23	-0.4	0.06	-0.04	-0.02	-0.07	0.14	0.13	0.12	0.14	-0.09	-0.27	-0.04	-0.16	0.13
A0A0R4J140	Cluh	Isoform of Q5SW19, Clustered mitochondria protein homolog OS=Mus musculus OX=10090 GN=Cluh PE=1 SV=1	-8.47e+18	0	109.568	20	22	160	0	22	1	479.53	160	22	0	>tr|A0A0R4J140|A0A0R4J140_MOUSE Isoform of Q5SW19, Clustered mitochondria protein homolog OS=Mus musculus OX=10090 GN=Cluh PE=1 SV=1	-0.21	-0.28	-0.13	-0.26	-0.04	-0.28	-0.15	-0.08	-0.02	-0.05	-0.22	-0.21	0	0.19	-0.12	0.01	0.01	-0.09	0.12	0.03	0.02	0.13	0.22	-0.19	-0.07	-0.15	0.32	-0.23	-0.08	-0.05	-0.19	-0.17	0.17
E9PYF4	Lmo7	LIM domain only 7 OS=Mus musculus OX=10090 GN=Lmo7 PE=1 SV=1	7.85e+18	0	109.381	16	20	120	0	20	1	510.39	120	20	0	>tr|E9PYF4|E9PYF4_MOUSE LIM domain only 7 OS=Mus musculus OX=10090 GN=Lmo7 PE=1 SV=1	-0.22	-0.3	0.04	0	0.15	0.2	0.18	0.08	0.11	0.09	-0.12	-0.24	-0.03	-0.02	-0.03	-0.15	-0.13	-0.16	0.05	0.11	0.13	0.1	0.05	0.16	0	-0.11	0.26	0.09	0.05	-0.06	0.02	-0.04	0.18
Q91YW3	Dnajc3	DnaJ homolog subfamily C member 3 OS=Mus musculus OX=10090 GN=Dnajc3 PE=1 SV=1	8.41e+18	0	109.281	41	16	159	16	16	1	616.57	159	16	0	>sp|Q91YW3|DNJC3_MOUSE DnaJ homolog subfamily C member 3 OS=Mus musculus OX=10090 GN=Dnajc3 PE=1 SV=1	0.08	0.14	0.05	0.05	-0.18	-0.32	-0.07	0.02	-0.19	0.01	-0.1	-0.03	-0.07	-0.12	-0.26	-0.02	0.12	-0.17	-0.28	0.07	0.08	0.05	0.11	-0.09	-0.09	0.07	0.08	-0.05	-0.02	0.02	0.01	-0.05	-0.09
P46460	Nsf	Vesicle-fusing ATPase OS=Mus musculus OX=10090 GN=Nsf PE=1 SV=2	6.95e+18	0	109.227	35	22	188	17	22	1	621.35	188	22	0	>sp|P46460|NSF_MOUSE Vesicle-fusing ATPase OS=Mus musculus OX=10090 GN=Nsf PE=1 SV=2	0.04	-0.19	0.06	0.13	0.09	-0.13	0.07	-0.01	0.08	0.1	0.05	0.05	0.07	0.23	0.11	0.04	0.11	0.06	0.08	-0.08	0	0.01	-0.08	0.19	-0.03	0.22	0.12	-0.02	-0.12	0.05	-0.08	-0.04	-0.03
Q8CHP8	Pgp	Glycerol-3-phosphate phosphatase OS=Mus musculus OX=10090 GN=Pgp PE=1 SV=1	4.13e+18	0	109.173	60	14	307	14	14	1	985.46	307	14	0	>sp|Q8CHP8|PGP_MOUSE Glycerol-3-phosphate phosphatase OS=Mus musculus OX=10090 GN=Pgp PE=1 SV=1	0	0	0.17	0.16	0.19	0.02	0.11	0.08	0.1	0.23	0.2	0.05	0.02	0.18	0.28	0.02	0.13	-0.12	0.02	-0.03	0.03	-0.09	-0.06	0.15	0.11	0.2	0.06	0.14	0.04	-0.07	0.09	0.08	0.07
Q544X6	Fech	Isoform of P22315, Ferrochelatase OS=Mus musculus OX=10090 GN=Fech PE=1 SV=1	6.34e+18	0	109.167	46	16	257	0	16	1	934.54	257	16	0	>tr|Q544X6|Q544X6_MOUSE Isoform of P22315, Ferrochelatase OS=Mus musculus OX=10090 GN=Fech PE=1 SV=1	-0.08	-0.14	0.1	0.12	0.04	-0.11	0.16	0.24	0.16	0.24	0.06	-0.12	0.1	0.11	0.07	0.04	-0.03	0.04	0.07	0.1	0.21	0.14	0.12	0.06	0.14	-0.07	0	0.2	0.06	-0.05	0.15	0.15	0.21
P35123	Usp4	Ubiquitin carboxyl-terminal hydrolase 4 OS=Mus musculus OX=10090 GN=Usp4 PE=1 SV=3	3.84e+17	0	109.081	33	23	154	0	22	1	481.79	154	23	0	>sp|P35123|UBP4_MOUSE Ubiquitin carboxyl-terminal hydrolase 4 OS=Mus musculus OX=10090 GN=Usp4 PE=1 SV=3	0.13	0.14	0.1	0.02	-0.01	0.06	-0.1	-0.02	-0.34	-0.05	0.02	-0.08	-0.05	-0.06	-0.18	0.01	0.05	0.21	0.06	-0.12	-0.08	-0.1	-0.07	-0.22	-0.09	0.13	-0.36	-0.1	-0.02	-0.13	0.05	-0.06	-0.15
E9Q401	Ryr2	Ryanodine receptor 2 OS=Mus musculus OX=10090 GN=Ryr2 PE=1 SV=1	-8.68e+18	0	108.935	3	13	347	0	1	1	876.45	347	13	0	>sp|E9Q401|RYR2_MOUSE Ryanodine receptor 2 OS=Mus musculus OX=10090 GN=Ryr2 PE=1 SV=1	NaN	NaN	NaN	NaN	NaN	NaN	NaN	NaN	NaN	0.2	NaN	NaN	NaN	NaN	NaN	NaN	NaN	NaN	NaN	NaN	NaN	0.7	0.37	NaN	NaN	NaN	NaN	NaN	NaN	NaN	NaN	NaN	NaN
O09110	Map2k3	Dual specificity mitogen-activated protein kinase kinase 3 OS=Mus musculus OX=10090 GN=Map2k3 PE=1 SV=2	-7.86e+18	0	108.878	56	16	233	0	13	1	792.6	233	16	3	>sp|O09110|MP2K3_MOUSE Dual specificity mitogen-activated protein kinase kinase 3 OS=Mus musculus OX=10090 GN=Map2k3 PE=1 SV=2	0.08	0.18	0.12	0.05	0.22	-0.06	-0.13	-0.08	-0.39	-0.13	-0.04	-0.36	0.12	-0.01	0.04	-0.16	-0.01	0.06	0.22	-0.03	0.23	-0.27	-0.13	0.13	0.14	0.24	-0.17	0.08	-0.14	-0.15	-0.14	-0.2	0.06
O35344	Kpna3	Importin subunit alpha-4 OS=Mus musculus OX=10090 GN=Kpna3 PE=1 SV=1	7.44e+18	0	108.799	35	13	246	7	7	1	1031.56	246	13	6	>sp|O35344|IMA4_MOUSE Importin subunit alpha-4 OS=Mus musculus OX=10090 GN=Kpna3 PE=1 SV=1	0.14	0.09	-0.06	-0.1	-0.02	-0.11	-0.11	0.01	-0.09	0.07	0.09	-0.11	-0.23	-0.47	-0.32	-0.05	-0.08	0.23	0.2	-0.41	-0.07	-0.06	-0.18	-0.5	-0.07	0.19	-0.39	-0.1	-0.25	-0.26	-0.18	-0.17	-0.13
Q8CI43	Myl6b	Myosin light chain 6B OS=Mus musculus OX=10090 GN=Myl6b PE=1 SV=1	-5.69e+18	0	108.763	71	14	302	13	13	1	995.15	302	14	1	>sp|Q8CI43|MYL6B_MOUSE Myosin light chain 6B OS=Mus musculus OX=10090 GN=Myl6b PE=1 SV=1	-1.22	-0.28	-0.82	0	-0.3	-0.8	0.79	-0.71	-0.87	-0.25	-0.72	-0.81	-0.56	-0.29	0.85	-0.64	-0.97	-2.08	-1.46	0.64	-0.09	-0.49	0.4	-0.62	0.31	-0.1	0.59	0.16	-0.64	-0.49	-0.68	-0.21	0.68
Q8C2Q7	Hnrnph1	Isoform of O35737, Heterogeneous nuclear ribonucleoprotein H OS=Mus musculus OX=10090 GN=Hnrnph1 PE=1 SV=1	-2.77e+18	0	108.759	43	13	225	0	6	1	900.18	225	13	7	>tr|Q8C2Q7|Q8C2Q7_MOUSE Isoform of O35737, Heterogeneous nuclear ribonucleoprotein H OS=Mus musculus OX=10090 GN=Hnrnph1 PE=1 SV=1	0.13	0.17	-0.1	0.04	0	-0.03	0.12	0.03	0.1	0.1	0.06	0.07	0.07	0.27	0.11	0.06	0.21	-0.2	-0.05	0.1	-0.02	-0.04	0.16	0.34	0.13	-0.08	0.26	0.06	-0.03	0.21	-0.04	0.07	0.01
Q9DBL1	Acadsb	Short/branched chain specific acyl-CoA dehydrogenase, mitochondrial OS=Mus musculus OX=10090 GN=Acadsb PE=1 SV=1	7e+18	0	108.631	40	12	266	1	12	1	982.59	266	12	0	>sp|Q9DBL1|ACDSB_MOUSE Short/branched chain specific acyl-CoA dehydrogenase, mitochondrial OS=Mus musculus OX=10090 GN=Acadsb PE=1 SV=1	-0.32	-0.18	-0.05	0.01	0.1	-0.01	-0.08	0.36	0.14	-0.02	-0.05	-0.19	-0.03	-0.08	0.13	0.02	-0.1	0.19	0.22	0.02	0.18	0.16	0.15	-0.25	-0.15	-0.15	-0.19	0.06	0.02	0.13	0.03	0.14	0.02
Q9Z2C5	Mtm1	Myotubularin OS=Mus musculus OX=10090 GN=Mtm1 PE=1 SV=2	-5.76e+18	0	108.506	44	18	151	0	18	1	496.09	151	18	0	>sp|Q9Z2C5|MTM1_MOUSE Myotubularin OS=Mus musculus OX=10090 GN=Mtm1 PE=1 SV=2	-0.02	-0.18	-0.14	0.01	0	-0.15	-0.04	0.27	-0.06	0.01	-0.14	-0.23	-0.13	-0.14	0.03	-0.12	-0.02	-0.05	0	-0.05	0.22	0.15	-0.14	-0.14	-0.03	-0.64	-0.1	0.27	0.03	0.03	0.08	0	-0.05
P21107-2	Tpm3	Isoform of P21107, Isoform 2 of Tropomyosin alpha-3 chain OS=Mus musculus OX=10090 GN=Tpm3	6.12e+17	0	108.417	53	19	4039	0	3	1	10101	4039	19	0	>sp|P21107-2|TPM3_MOUSE Isoform of P21107, Isoform 2 of Tropomyosin alpha-3 chain OS=Mus musculus OX=10090 GN=Tpm3	-0.34	-0.16	0.12	-0.04	-0.08	0.22	-0.21	-0.34	0.22	-0.01	0.08	0.74	0.09	1.11	0.37	0.11	0.61	-0.23	-0.32	0.41	-0.58	0.08	0.59	0.82	-0.14	-0.26	0.83	-0.17	0.13	0.64	-0.11	0.26	0.07
Q9Z2U1	Psma5	Proteasome subunit alpha type-5 OS=Mus musculus OX=10090 GN=Psma5 PE=1 SV=1	-2.98e+18	0	108.286	46	8	270	7	8	1	1204.43	270	8	0	>sp|Q9Z2U1|PSA5_MOUSE Proteasome subunit alpha type-5 OS=Mus musculus OX=10090 GN=Psma5 PE=1 SV=1	0.14	0.16	0.19	0.19	-0.14	0.04	0.32	0.03	0.16	0.18	0.16	0.23	0.2	0.18	0.19	0.16	0.06	0.31	0.17	-0.07	-0.03	-0.22	-0.18	0.21	0.1	0.1	-0.19	0.07	-0.21	-0.07	-0.04	0	0.14
Q3UZG4	Aimp1	Isoform of P31230, Aminoacyl tRNA synthase complex-interacting multifunctional protein 1 OS=Mus musculus OX=10090 GN=Aimp1 PE=1 SV=1	5.5e+18	0	108.156	63	15	233	0	15	1	861.29	233	15	0	>tr|Q3UZG4|Q3UZG4_MOUSE Isoform of P31230, Aminoacyl tRNA synthase complex-interacting multifunctional protein 1 OS=Mus musculus OX=10090 GN=Aimp1 PE=1 SV=1	0.04	-0.01	0.1	0.1	-0.07	-0.04	-0.1	0	-0.15	-0.18	-0.1	-0.11	-0.02	-0.21	-0.2	0.16	0.16	0.22	0.01	-0.13	-0.01	-0.01	0.16	-0.15	-0.07	0.08	0.05	-0.06	0.1	-0.02	0.18	0.07	0.08
E9PV45	Usp24	Isoform of B1AY13, Ubiquitin carboxyl-terminal hydrolase 24 OS=Mus musculus OX=10090 GN=Usp24 PE=1 SV=1	-7.62e+18	0	108.139	14	24	111	0	24	1	369.28	111	24	0	>tr|E9PV45|E9PV45_MOUSE Isoform of B1AY13, Ubiquitin carboxyl-terminal hydrolase 24 OS=Mus musculus OX=10090 GN=Usp24 PE=1 SV=1	-0.23	-0.24	-0.22	-0.11	-0.02	-0.52	-0.24	0.06	-0.2	-0.08	-0.14	-0.24	-0.09	-0.54	-0.33	-0.07	-0.23	0.07	-0.12	-0.35	0.11	-0.09	-0.08	-0.63	-0.26	-0.1	-0.38	-0.03	-0.17	-0.21	0.05	-0.12	0.06
Q9CQV8	Ywhab	14-3-3 protein beta/alpha OS=Mus musculus OX=10090 GN=Ywhab PE=1 SV=3	1.62e+18	0	107.958	60	12	535	0	6	1	1558	535	12	0	>sp|Q9CQV8|1433B_MOUSE 14-3-3 protein beta/alpha OS=Mus musculus OX=10090 GN=Ywhab PE=1 SV=3	-0.12	0.15	-0.05	0.15	-0.14	0.4	-0.06	-0.11	0.35	-0.03	-0.22	0.31	0.35	0.4	0.56	0.57	-0.14	0.09	-0.05	0.32	-0.2	0.47	0.06	0.4	-0.19	0.16	-0.26	-0.24	-0.16	0.2	-0.08	0.14	-0.35
P59017	Bcl2l13	Bcl-2-like protein 13 OS=Mus musculus OX=10090 GN=Bcl2l13 PE=1 SV=2	-2.48e+17	0	107.812	41	11	161	10	11	1	682.23	161	11	0	>sp|P59017|B2L13_MOUSE Bcl-2-like protein 13 OS=Mus musculus OX=10090 GN=Bcl2l13 PE=1 SV=2	-0.11	0.12	-0.08	-0.11	0.18	0.24	-0.06	-0.05	0.06	-0.03	0.12	-0.19	0.03	-0.19	0.07	0.17	-0.13	-0.2	-0.12	-0.09	0.07	-0.03	-0.19	-0.11	-0.02	-0.05	-0.19	-0.13	0.02	-0.1	-0.06	0.02	-0.02
A0A0R4IZW8	Capns1	Isoform of O88456, Calpain small subunit 1 OS=Mus musculus OX=10090 GN=Capns1 PE=1 SV=1	2.47e+18	0	107.738	72	9	151	1	9	1	606.3	151	9	0	>tr|A0A0R4IZW8|A0A0R4IZW8_MOUSE Isoform of O88456, Calpain small subunit 1 OS=Mus musculus OX=10090 GN=Capns1 PE=1 SV=1	0.29	0.59	0	0.02	0.02	0.18	0.01	0.03	-0.05	0.04	0.08	-0.03	-0.03	-0.28	-0.4	-0.12	-0.17	0.17	-0.02	-0.18	-0.03	-0.06	-0.31	-0.25	0.02	-0.09	-0.13	0.1	-0.05	-0.12	-0.02	-0.15	-0.01
Q9JIF7	Copb1	Coatomer subunit beta OS=Mus musculus OX=10090 GN=Copb1 PE=1 SV=1	-2.11e+18	0	107.717	29	20	132	20	20	1	452.45	132	20	0	>sp|Q9JIF7|COPB_MOUSE Coatomer subunit beta OS=Mus musculus OX=10090 GN=Copb1 PE=1 SV=1	-0.05	0	-0.09	-0.15	-0.17	0.04	-0.18	-0.17	-0.21	-0.27	-0.19	-0.14	-0.1	-0.28	-0.33	-0.1	-0.06	0.06	-0.13	0.02	-0.06	0.01	-0.1	-0.28	-0.16	0.11	-0.01	-0.22	-0.06	0	-0.04	-0.09	-0.14
O35857	Timm44	Mitochondrial import inner membrane translocase subunit TIM44 OS=Mus musculus OX=10090 GN=Timm44 PE=1 SV=2	-8.43e+18	0	107.678	36	16	216	16	16	1	754.9	216	16	0	>sp|O35857|TIM44_MOUSE Mitochondrial import inner membrane translocase subunit TIM44 OS=Mus musculus OX=10090 GN=Timm44 PE=1 SV=2	-0.26	-0.27	-0.15	-0.04	-0.08	-0.22	-0.04	-0.04	0	-0.07	-0.02	-0.15	-0.03	-0.07	0.17	-0.03	-0.06	-0.05	0.09	-0.11	0.12	0.21	0.07	0.03	0.14	0.01	-0.02	-0.02	-0.07	-0.11	-0.11	-0.09	0.11
D3Z7X0	Acad12	Acyl-Coenzyme A dehydrogenase family, member 12 OS=Mus musculus OX=10090 GN=Acad12 PE=1 SV=1	-2.06e+18	0	107.597	30	15	159	2	6	1	578.22	159	15	9	>tr|D3Z7X0|D3Z7X0_MOUSE Acyl-Coenzyme A dehydrogenase family, member 12 OS=Mus musculus OX=10090 GN=Acad12 PE=1 SV=1	-0.25	-0.13	-0.04	0.07	0.21	0.16	0.06	0.3	0.39	0.13	-0.11	-0.23	0.31	0.29	0.48	0.3	0.02	-0.08	0.16	0.11	0.15	-0.72	-0.64	0.24	0.02	-0.01	0.1	0.09	0.03	0.11	0.09	0.16	0.16
P37040	Por	NADPH--cytochrome P450 reductase OS=Mus musculus OX=10090 GN=Por PE=1 SV=2	5.4e+18	0	107.556	33	18	171	2	18	1	544.28	171	18	0	>sp|P37040|NCPR_MOUSE NADPH--cytochrome P450 reductase OS=Mus musculus OX=10090 GN=Por PE=1 SV=2	-0.29	-0.02	-0.11	0.48	-0.06	0.55	-0.25	-0.18	0.43	-0.22	-0.22	0.18	0.54	0.58	0.59	0.56	-0.12	0.02	0.08	0.91	0.35	0.52	0.24	0.61	-0.18	0.06	0.06	-0.28	-0.03	0.29	-0.06	0.25	-0.02
A0A286YCI8	Sorbs1	Isoform of Q62417, Sorbin and SH3 domain-containing protein 1 OS=Mus musculus OX=10090 GN=Sorbs1 PE=1 SV=1	-1.6e+18	0	107.419	15	16	102	0	3	1	353.48	102	16	13	>tr|A0A286YCI8|A0A286YCI8_MOUSE Isoform of Q62417, Sorbin and SH3 domain-containing protein 1 OS=Mus musculus OX=10090 GN=Sorbs1 PE=1 SV=1	-0.28	-0.23	-0.12	0.03	0.16	0.24	0.08	-0.11	0.36	-0.17	0.08	0.16	0.07	0.41	0.66	0.25	-0.21	-0.4	-0.06	0.6	0.31	0.13	0.16	0.54	0.41	0.23	-0.14	0.16	0.05	0.12	-0.05	0.24	0.21
A0A0G2JGS4	Camk2d	Isoform of Q6PHZ2, Calcium/calmodulin-dependent protein kinase type II subunit delta OS=Mus musculus OX=10090 GN=Camk2d PE=1 SV=1	2.15e+17	0	107.09	38	16	235	0	12	1	822.51	235	16	1	>tr|A0A0G2JGS4|A0A0G2JGS4_MOUSE Isoform of Q6PHZ2, Calcium/calmodulin-dependent protein kinase type II subunit delta OS=Mus musculus OX=10090 GN=Camk2d PE=1 SV=1	0.4	0.23	0.01	-0.01	-0.28	0.02	0.21	0.09	0.14	0.12	-0.03	-0.12	-0.26	-0.32	-0.49	0.05	-0.06	0.15	0.15	-0.18	0.07	0.23	0.23	0.12	0.16	0.16	0.36	-0.01	-0.03	0.02	0.1	0.07	0.07
Q8CJ53	Trip10	Cdc42-interacting protein 4 OS=Mus musculus OX=10090 GN=Trip10 PE=1 SV=2	5.47e+18	0	106.966	38	20	303	0	20	1	1133.02	303	20	0	>sp|Q8CJ53|CIP4_MOUSE Cdc42-interacting protein 4 OS=Mus musculus OX=10090 GN=Trip10 PE=1 SV=2	0.2	0.15	0.12	0.09	0.11	-0.32	-0.02	0.01	-0.05	-0.1	0.02	-0.08	-0.14	0.06	0.01	0.03	-0.09	0.14	0.03	0.09	0.12	0	-0.03	0.02	0.02	0.2	0.19	0.03	0.02	-0.1	0.06	0.02	0.02
P19246	Nefh	Neurofilament heavy polypeptide OS=Mus musculus OX=10090 GN=Nefh PE=1 SV=3	9.08e+18	0	106.815	24	23	208	20	20	1	645.32	208	23	0	>sp|P19246|NFH_MOUSE Neurofilament heavy polypeptide OS=Mus musculus OX=10090 GN=Nefh PE=1 SV=3	0.52	-0.69	0.24	-0.19	-0.4	-0.55	-0.32	-0.06	0.54	-0.21	0.07	-0.07	-0.4	0.16	-0.14	-0.59	-0.45	-0.26	0.88	-0.36	-0.1	0.08	0.15	-0.38	-0.09	-0.37	-0.87	-0.27	0.07	-0.63	-0.43	-0.77	-0.12
Q8VDQ1	Ptgr2	Prostaglandin reductase 2 OS=Mus musculus OX=10090 GN=Ptgr2 PE=1 SV=2	8.81e+18	0	106.745	51	12	163	1	12	1	634.89	163	12	0	>sp|Q8VDQ1|PTGR2_MOUSE Prostaglandin reductase 2 OS=Mus musculus OX=10090 GN=Ptgr2 PE=1 SV=2	-0.17	0.06	-0.1	0.03	0.06	0.15	0.05	0	0.13	-0.01	0.06	-0.08	0.03	0.12	0.21	0.07	0	-0.08	0.18	-0.04	-0.02	-0.13	-0.09	0.03	-0.06	-0.08	0.02	0.08	-0.01	0.11	-0.12	0.09	-0.13
Q08857	Cd36	Platelet glycoprotein 4 OS=Mus musculus OX=10090 GN=Cd36 PE=1 SV=2	-8.75e+18	0	106.547	29	10	318	7	10	1	1109.7	318	10	0	>sp|Q08857|CD36_MOUSE Platelet glycoprotein 4 OS=Mus musculus OX=10090 GN=Cd36 PE=1 SV=2	-0.22	0.33	-0.26	0.04	0.06	0.42	-0.08	0.04	0.8	-0.02	0.13	0.07	0.61	0.82	0.85	0.78	-0.02	-0.16	-0.01	0.52	0.28	0.26	-0.01	0.67	0.25	-0.05	0.08	-0.04	-0.06	0.45	-0.12	0.55	-0.36
Q8R4N0	Clybl	Citramalyl-CoA lyase, mitochondrial OS=Mus musculus OX=10090 GN=Clybl PE=1 SV=2	2.98e+18	0	106.546	55	17	240	17	17	1	827.11	240	17	0	>sp|Q8R4N0|CLYBL_MOUSE Citramalyl-CoA lyase, mitochondrial OS=Mus musculus OX=10090 GN=Clybl PE=1 SV=2	-0.36	-0.21	0.05	0.09	-0.02	-0.09	0.38	0.3	0.39	0.3	-0.03	-0.12	0.38	0.35	0.55	0.42	0.05	-0.06	0.13	0.02	-0.02	-0.03	-0.15	0.16	0.19	0.16	-0.14	0.32	0.2	0.32	0.18	0.33	-0.06
P63328-2	Ppp3ca	Isoform of P63328, Isoform 2 of Serine/threonine-protein phosphatase 2B catalytic subunit alpha isoform OS=Mus musculus OX=10090 GN=Ppp3ca	1.21e+18	0	106.359	38	16	295	1	1	1	879.3	295	16	17	>sp|P63328-2|PP2BA_MOUSE Isoform of P63328, Isoform 2 of Serine/threonine-protein phosphatase 2B catalytic subunit alpha isoform OS=Mus musculus OX=10090 GN=Ppp3ca	0.15	0.07	-0.08	-0.01	0.04	-0.28	0.05	0.06	-0.02	0.13	0.01	-0.11	-0.28	-0.31	-0.13	-0.26	-0.22	0.12	-0.01	-0.04	-0.05	-0.07	-0.18	0.15	-0.03	0.22	-0.02	-0.01	0	-0.07	0	-0.03	-0.1
Q00519	Xdh	Xanthine dehydrogenase/oxidase OS=Mus musculus OX=10090 GN=Xdh PE=1 SV=5	-5.48e+18	0	106.303	18	18	170	17	18	1	554.99	170	18	0	>sp|Q00519|XDH_MOUSE Xanthine dehydrogenase/oxidase OS=Mus musculus OX=10090 GN=Xdh PE=1 SV=5	0.16	0.39	-0.23	-0.1	0.03	-0.1	-0.45	0.08	-0.01	-0.21	-0.19	0.27	0.14	0.28	0.38	0.48	0.11	-0.56	-0.46	0.48	0.24	0.23	0.02	0.43	0.44	0	0.49	0.31	0.26	0.54	0.09	0.57	-0.28
O88569	Hnrnpa2b1	Heterogeneous nuclear ribonucleoproteins A2/B1 OS=Mus musculus OX=10090 GN=Hnrnpa2b1 PE=1 SV=2	-8.07e+18	0	105.954	56	17	461	1	2	1	1517	461	17	15	>sp|O88569|ROA2_MOUSE Heterogeneous nuclear ribonucleoproteins A2/B1 OS=Mus musculus OX=10090 GN=Hnrnpa2b1 PE=1 SV=2	0	0.09	-0.09	0.05	0.09	0.16	0.21	-0.07	0.32	0.2	0.11	0.3	0.19	0.4	0.19	0.12	0.25	-0.1	-0.05	0.39	0.02	0.06	0.11	0.71	0.13	0.09	0.47	0.08	0.07	0.36	0.01	0.18	-0.03
Q9JMC3	Dnaja4	DnaJ homolog subfamily A member 4 OS=Mus musculus OX=10090 GN=Dnaja4 PE=1 SV=1	-8.82e+18	0	105.862	50	16	193	10	16	1	636.07	193	16	0	>sp|Q9JMC3|DNJA4_MOUSE DnaJ homolog subfamily A member 4 OS=Mus musculus OX=10090 GN=Dnaja4 PE=1 SV=1	-0.09	-0.04	0.03	0.04	0.15	-0.08	0.14	0.1	-0.07	-0.14	0.05	-0.22	-0.16	-0.03	0.01	0.15	0.02	-0.03	0.04	0.07	0.07	-0.07	0.14	-0.28	0.04	0.06	0.62	0.1	0.15	0.01	-0.02	-0.1	0.05
Q3TZZ7	Esyt2	Extended synaptotagmin-2 OS=Mus musculus OX=10090 GN=Esyt2 PE=1 SV=1	7.28e+18	0	105.706	30	16	111	5	16	1	419.99	111	16	0	>sp|Q3TZZ7|ESYT2_MOUSE Extended synaptotagmin-2 OS=Mus musculus OX=10090 GN=Esyt2 PE=1 SV=1	0.03	0.09	0.12	0.07	0.23	-0.09	0.03	0.14	0.09	0.06	0.14	0.07	-0.12	0.04	0	0.11	0.13	-0.11	-0.17	0.18	0.23	0.09	-0.04	-0.13	0.02	0.21	0.38	-0.03	-0.01	0.04	0.01	0.07	0.09
P09671	Sod2	Superoxide dismutase [Mn], mitochondrial OS=Mus musculus OX=10090 GN=Sod2 PE=1 SV=3	-7.81e+18	0	105.699	64	11	375	11	11	1	1223.27	375	11	0	>sp|P09671|SODM_MOUSE Superoxide dismutase [Mn], mitochondrial OS=Mus musculus OX=10090 GN=Sod2 PE=1 SV=3	-0.44	-0.3	-0.26	-0.06	0.14	-0.14	-0.02	0.14	0.15	0.08	-0.09	-0.18	0.03	-0.01	0.22	0.05	0.01	-0.16	0.02	0.14	0.21	0.2	0.15	-0.1	0.07	0.1	0.11	0.23	0	-0.1	-0.02	0.05	-0.05
A0A0R4J0P1	Acad8	Isoform of Q9D7B6, Acyl-Coenzyme A dehydrogenase family, member 8 OS=Mus musculus OX=10090 GN=Acad8 PE=1 SV=1	2.47e+18	0	105.633	43	15	225	0	15	1	687.09	225	15	0	>tr|A0A0R4J0P1|A0A0R4J0P1_MOUSE Isoform of Q9D7B6, Acyl-Coenzyme A dehydrogenase family, member 8 OS=Mus musculus OX=10090 GN=Acad8 PE=1 SV=1	-0.22	-0.15	-0.29	-0.14	0.09	-0.03	-0.02	0.15	0.04	0.07	-0.43	-0.3	-0.01	-0.09	0.17	0.11	-0.09	-0.12	0.05	-0.26	-0.2	-0.02	-0.18	-0.06	0.02	0.01	0.1	0.11	-0.06	0.01	0	0.07	0.15
Q9ET54	Palld	Palladin OS=Mus musculus OX=10090 GN=Palld PE=1 SV=2	-2.45e+18	0	105.599	23	24	227	0	2	1	798.75	227	24	21	>sp|Q9ET54|PALLD_MOUSE Palladin OS=Mus musculus OX=10090 GN=Palld PE=1 SV=2	-0.23	-0.28	-0.15	0.02	-0.18	-0.03	-0.02	-0.02	0	0.07	-0.1	-0.2	-0.04	-0.14	-0.27	-0.13	-0.23	0.1	-0.03	0.11	0.26	0.18	0.15	-0.2	-0.3	-0.15	0.03	-0.33	-0.13	-0.13	-0.14	-0.19	0.04
Q66JS6	Eif3j2	Eukaryotic translation initiation factor 3 subunit J-B OS=Mus musculus OX=10090 GN=Eif3j2 PE=1 SV=1	6.93e+18	0	105.584	49	14	235	0	14	1	895.83	235	14	0	>sp|Q66JS6|EI3JB_MOUSE Eukaryotic translation initiation factor 3 subunit J-B OS=Mus musculus OX=10090 GN=Eif3j2 PE=1 SV=1	0.22	0.3	0.02	0.07	0.02	0.39	-0.07	0.01	-0.22	-0.13	-0.1	-0.01	-0.19	-0.39	-0.18	0.23	-0.09	0.05	0.07	-0.2	-0.12	-0.01	-0.35	0.17	-0.18	0.16	-0.18	-0.1	-0.15	-0.19	-0.07	0	-0.09
Q6P5F9	Xpo1	Exportin-1 OS=Mus musculus OX=10090 GN=Xpo1 PE=1 SV=1	-6.91e+18	0	105.464	22	18	165	14	18	1	572.18	165	18	0	>sp|Q6P5F9|XPO1_MOUSE Exportin-1 OS=Mus musculus OX=10090 GN=Xpo1 PE=1 SV=1	0.13	0.09	-0.09	-0.11	-0.06	-0.16	0.02	-0.01	-0.03	0.04	0.04	0.03	-0.11	-0.22	-0.32	-0.05	-0.03	0.05	-0.02	-0.11	-0.15	-0.1	-0.26	-0.15	-0.01	0.08	-0.22	-0.04	-0.09	-0.07	-0.03	-0.05	-0.09
P99026	Psmb4	Proteasome subunit beta type-4 OS=Mus musculus OX=10090 GN=Psmb4 PE=1 SV=1	5.15e+18	0	105.432	48	8	223	8	8	1	1010.94	223	8	0	>sp|P99026|PSB4_MOUSE Proteasome subunit beta type-4 OS=Mus musculus OX=10090 GN=Psmb4 PE=1 SV=1	-0.05	0.01	0.23	0.14	-0.12	-0.25	0.21	0.11	0.03	0.17	0.11	0.02	0.07	0.1	-0.05	-0.04	0.08	0.19	-0.14	-0.12	-0.01	-0.11	-0.23	-0.05	-0.1	0.23	-0.01	-0.02	-0.18	-0.15	-0.11	-0.17	0.02
A2AH85	Eftud2	Isoform of O08810, 116 kDa U5 small nuclear ribonucleoprotein component OS=Mus musculus OX=10090 GN=Eftud2 PE=1 SV=1	8.65e+18	0	105.414	32	21	143	0	20	1	521.44	143	21	0	>tr|A2AH85|A2AH85_MOUSE Isoform of O08810, 116 kDa U5 small nuclear ribonucleoprotein component OS=Mus musculus OX=10090 GN=Eftud2 PE=1 SV=1	0.01	0.07	-0.04	-0.05	0.03	NaN	-0.03	-0.07	-0.06	-0.06	0.04	0.04	0.07	0.29	-0.08	-0.01	0.2	-0.03	-0.15	0.12	-0.04	0	0.28	0.3	-0.06	0.09	0.27	-0.01	-0.06	0.08	-0.09	-0.06	-0.03
P70236	Map2k6	Dual specificity mitogen-activated protein kinase kinase 6 OS=Mus musculus OX=10090 GN=Map2k6 PE=1 SV=1	6.3e+18	0	105.363	57	16	243	3	13	1	787.93	243	16	0	>sp|P70236|MP2K6_MOUSE Dual specificity mitogen-activated protein kinase kinase 6 OS=Mus musculus OX=10090 GN=Map2k6 PE=1 SV=1	0.17	-0.09	0.05	-0.29	0.21	-0.07	0.12	0.18	0.06	0.21	-0.25	-0.12	-0.3	-0.34	-0.63	-0.06	0.13	0.12	0.18	-0.13	0.11	0.08	0.05	-0.46	-0.12	-0.13	0.1	0.03	0.1	-0.09	0.23	-0.01	0.37
P70333	Hnrnph2	Heterogeneous nuclear ribonucleoprotein H2 OS=Mus musculus OX=10090 GN=Hnrnph2 PE=1 SV=1	2.98e+18	0	105.268	35	10	175	4	4	1	665.39	175	10	0	>sp|P70333|HNRH2_MOUSE Heterogeneous nuclear ribonucleoprotein H2 OS=Mus musculus OX=10090 GN=Hnrnph2 PE=1 SV=1	-0.14	0.2	0.05	0.03	0.13	-0.03	0.03	-0.15	0.09	0.2	0.17	0.36	-0.07	0.44	0.22	0.17	0.05	0.01	-0.2	0.01	0.07	0.11	0.34	0.03	0.09	0.29	0.59	0.24	-0.03	0.13	-0.04	0.4	0.05
P37804	Tagln	Transgelin OS=Mus musculus OX=10090 GN=Tagln PE=1 SV=3	-7.46e+18	0	105.007	78	15	264	5	15	1	810.88	264	15	0	>sp|P37804|TAGL_MOUSE Transgelin OS=Mus musculus OX=10090 GN=Tagln PE=1 SV=3	-0.59	-1.05	-0.64	0.01	-0.51	-0.13	-0.17	-0.37	0.23	-0.11	0.26	0.31	-0.28	0.15	-0.27	-0.16	-0.5	0.66	0.2	0.19	-0.02	0.18	0.37	-0.27	-0.21	0.28	-0.13	-0.32	-0.07	-0.18	-0.27	-0.61	-0.18
Q91Z53	Grhpr	Glyoxylate reductase/hydroxypyruvate reductase OS=Mus musculus OX=10090 GN=Grhpr PE=1 SV=1	5.13e+18	0	104.998	57	15	257	5	15	1	1013.88	257	15	0	>sp|Q91Z53|GRHPR_MOUSE Glyoxylate reductase/hydroxypyruvate reductase OS=Mus musculus OX=10090 GN=Grhpr PE=1 SV=1	0.19	0.07	0.11	0.11	-0.05	0.21	-0.08	0.17	-0.17	-0.13	0.06	-0.08	-0.05	-0.01	0	0.14	0.02	0.31	0.19	-0.32	-0.13	-0.01	-0.09	-0.14	-0.17	0.22	-0.11	0.01	-0.07	-0.06	0.07	0.02	0.03
Q3TL44	Nlrx1	NLR family member X1 OS=Mus musculus OX=10090 GN=Nlrx1 PE=1 SV=1	-6.19e+18	0	104.783	27	18	125	17	18	1	415.1	125	18	0	>sp|Q3TL44|NLRX1_MOUSE NLR family member X1 OS=Mus musculus OX=10090 GN=Nlrx1 PE=1 SV=1	-0.18	0.03	-0.17	-0.18	0.03	-0.11	0.16	-0.01	-0.09	0.06	-0.04	-0.35	0.2	-0.1	0.11	0.13	-0.07	-0.15	0.19	-0.09	0.12	0.13	0.09	-0.03	0.04	0.06	-0.14	0.03	0.07	-0.17	0.02	-0.06	0.04
Q9ER72	Cars	Cysteine--tRNA ligase, cytoplasmic OS=Mus musculus OX=10090 GN=Cars PE=1 SV=2	4.85e+18	0	104.607	33	23	159	2	23	1	500.22	159	23	0	>sp|Q9ER72|SYCC_MOUSE Cysteine--tRNA ligase, cytoplasmic OS=Mus musculus OX=10090 GN=Cars PE=1 SV=2	-0.19	-0.1	0.19	0.14	0.01	0.04	-0.04	0.02	-0.07	-0.01	0.01	-0.13	0.08	0	0.04	0.12	0.07	0.04	-0.01	-0.08	0.04	0.07	-0.28	0.25	0.07	0.01	-0.1	-0.04	0.1	-0.01	0.14	0.1	0.16
A2AMM0	Cavin4	Caveolae-associated protein 4 OS=Mus musculus OX=10090 GN=Cavin4 PE=1 SV=1	-1.72e+17	0	104.56	44	11	344	11	11	1	1348.06	344	11	0	>sp|A2AMM0|CAVN4_MOUSE Caveolae-associated protein 4 OS=Mus musculus OX=10090 GN=Cavin4 PE=1 SV=1	0.21	0.31	-0.01	-0.08	0.08	0.15	0.14	0.02	0.13	0.18	0.06	0.02	0.12	-0.01	0.15	0.04	-0.03	0.08	-0.06	-0.06	0.06	-0.16	-0.09	-0.01	0.27	0.2	-0.32	0.18	-0.16	-0.2	-0.08	-0.11	-0.08
O35206	Col15a1	Collagen alpha-1(XV) chain OS=Mus musculus OX=10090 GN=Col15a1 PE=1 SV=2	-8.09e+18	0	104.401	15	14	224	0	14	1	782.45	224	14	0	>sp|O35206|COFA1_MOUSE Collagen alpha-1(XV) chain OS=Mus musculus OX=10090 GN=Col15a1 PE=1 SV=2	0.12	0.04	-0.01	0.01	0.05	0.01	-0.04	-0.18	0.08	0.1	0.07	0.12	-0.07	0.01	0.02	-0.04	0.12	0.12	0.24	-0.11	-0.09	0.06	0.18	0.35	0.42	0.07	0.1	-0.05	-0.03	-0.14	-0.08	0.05	-0.03
Q8CDN6	Txnl1	Thioredoxin-like protein 1 OS=Mus musculus OX=10090 GN=Txnl1 PE=1 SV=3	6.1e+18	0	104.223	57	11	203	11	11	1	775.47	203	11	0	>sp|Q8CDN6|TXNL1_MOUSE Thioredoxin-like protein 1 OS=Mus musculus OX=10090 GN=Txnl1 PE=1 SV=3	0.25	0.28	0.13	0.05	-0.06	0.08	-0.03	-0.04	-0.11	0.18	0.07	0.02	0.08	-0.04	0.05	0.11	-0.08	0.13	-0.02	-0.11	-0.17	-0.2	-0.19	0.3	0.08	0.27	-0.06	-0.04	-0.2	-0.13	-0.16	-0.17	0
P62962	Pfn1	Profilin-1 OS=Mus musculus OX=10090 GN=Pfn1 PE=1 SV=2	-1.61e+17	0	103.676	72	8	271	3	8	1	838.68	271	8	0	>sp|P62962|PROF1_MOUSE Profilin-1 OS=Mus musculus OX=10090 GN=Pfn1 PE=1 SV=2	0.11	0.06	0.02	0.1	-0.08	0.26	-0.1	-0.11	0.02	-0.04	-0.1	0.35	0.13	0.37	0.24	0.14	0.32	0.01	0.02	0.17	-0.33	-0.09	-0.12	0.89	-0.05	0.28	0.04	-0.16	-0.16	0.52	-0.23	0.18	-0.01
P53994	Rab2a	Ras-related protein Rab-2A OS=Mus musculus OX=10090 GN=Rab2a PE=1 SV=1	-2.44e+18	0	103.545	67	11	182	5	11	1	628.42	182	11	0	>sp|P53994|RAB2A_MOUSE Ras-related protein Rab-2A OS=Mus musculus OX=10090 GN=Rab2a PE=1 SV=1	0.37	0.28	0.11	0.09	0.16	0.14	0.18	-0.06	0.22	0.3	0.26	0	0.22	-0.1	0.06	0.15	0.18	-0.06	-0.15	-0.23	-0.13	-0.08	-0.28	0.07	0.13	0.33	-0.2	0.05	0.13	-0.11	0.23	-0.02	0.2
Q8QZY1	Eif3l	Eukaryotic translation initiation factor 3 subunit L OS=Mus musculus OX=10090 GN=Eif3l PE=1 SV=1	8.38e+18	0	103.526	39	19	173	17	19	1	524.94	173	19	0	>sp|Q8QZY1|EIF3L_MOUSE Eukaryotic translation initiation factor 3 subunit L OS=Mus musculus OX=10090 GN=Eif3l PE=1 SV=1	0.1	0.19	0.05	0.02	-0.1	-0.12	0	-0.06	-0.12	-0.03	0.02	0	-0.04	-0.09	-0.03	0	0.03	0.08	0.09	0.09	-0.02	-0.1	-0.24	0.05	0.07	0.08	-0.08	-0.06	-0.05	0.1	0.02	-0.03	-0.06
Q8BGT5	Gpt2	Alanine aminotransferase 2 OS=Mus musculus OX=10090 GN=Gpt2 PE=1 SV=1	6.5e+18	0	103.458	51	18	263	13	17	1	828.29	263	18	1	>sp|Q8BGT5|ALAT2_MOUSE Alanine aminotransferase 2 OS=Mus musculus OX=10090 GN=Gpt2 PE=1 SV=1	0.2	0.09	0.08	0.04	0.48	0.25	0.37	0.01	0.41	0.62	0.33	0.1	0.33	0.31	0.31	-0.05	0.28	-0.25	-0.11	0.16	0.23	-0.08	-0.25	0.18	0.34	0.22	-0.02	0.48	0.21	-0.11	0.23	0.17	0.19
E9Q1G8	2021-09-07	Isoform of O55131, Septin-7 OS=Mus musculus OX=10090 GN=Sept7 PE=1 SV=2	-8.93e+18	0	103.446	42	16	172	0	14	1	623.92	172	16	2	>tr|E9Q1G8|E9Q1G8_MOUSE Isoform of O55131, Septin-7 OS=Mus musculus OX=10090 GN=Sept7 PE=1 SV=2	-0.08	0.15	-0.07	0.04	-0.06	-0.01	-0.04	-0.14	0.19	0.11	-0.07	0.13	-0.13	0.11	0.03	-0.05	0.01	0.02	-0.15	0.08	-0.12	0.12	0.02	0.05	0.08	0.08	0.24	-0.11	-0.09	0.15	-0.13	0.01	-0.09
Q5RKN9	Capza1	Isoform of P47753, Capping protein (Actin filament) muscle Z-line, alpha 1 OS=Mus musculus OX=10090 GN=Capza1 PE=1 SV=1	-1.8e+18	0	103.428	66	11	262	1	9	1	1128.56	262	11	0	>tr|Q5RKN9|Q5RKN9_MOUSE Isoform of P47753, Capping protein (Actin filament) muscle Z-line, alpha 1 OS=Mus musculus OX=10090 GN=Capza1 PE=1 SV=1	0.1	0	0.09	-0.05	0.06	0.18	-0.18	0.05	-0.34	-0.03	0.25	0.36	0.15	0.17	-0.04	0.26	0.25	0	-0.11	-0.15	-0.14	0.06	-0.02	0.01	-0.19	0.3	-0.09	-0.01	-0.12	0.13	-0.02	-0.03	-0.03
P35385	Hspb7	Heat shock protein beta-7 OS=Mus musculus OX=10090 GN=Hspb7 PE=1 SV=3	3.76e+18	0	103.315	75	8	260	8	8	1	1139.13	260	8	0	>sp|P35385|HSPB7_MOUSE Heat shock protein beta-7 OS=Mus musculus OX=10090 GN=Hspb7 PE=1 SV=3	-0.35	-0.44	0.18	0.19	-0.12	-0.16	0.38	-0.07	0.08	-0.03	-0.04	-0.39	-0.23	-0.01	0.43	-0.33	-0.37	-0.66	-0.57	0.64	0.54	-0.15	0.33	-0.01	0.37	0.41	1.03	0.22	0.1	-0.05	-0.28	-0.19	0.48
Q9EPL8	Ipo7	Importin-7 OS=Mus musculus OX=10090 GN=Ipo7 PE=1 SV=2	-3.18e+18	0	103.311	24	17	141	17	17	1	496.9	141	17	0	>sp|Q9EPL8|IPO7_MOUSE Importin-7 OS=Mus musculus OX=10090 GN=Ipo7 PE=1 SV=2	0.03	-0.11	-0.16	0	0.03	0.09	-0.07	0.03	-0.07	0.05	-0.19	-0.05	-0.1	-0.46	-0.09	-0.02	0.02	0.08	-0.07	-0.03	0.15	0.01	-0.01	0	-0.03	0.09	-0.52	-0.03	-0.08	-0.09	0.03	-0.06	0.13
A0A0M3HEQ0	Txnrd2	Isoform of Q9JLT4, Thioredoxin reductase 2, mitochondrial OS=Mus musculus OX=10090 GN=Txnrd2 PE=1 SV=1	-8.48e+18	0	103.288	35	13	136	0	12	1	494.53	136	13	0	>tr|A0A0M3HEQ0|A0A0M3HEQ0_MOUSE Isoform of Q9JLT4, Thioredoxin reductase 2, mitochondrial OS=Mus musculus OX=10090 GN=Txnrd2 PE=1 SV=1	-0.3	0.33	-0.07	-0.05	0	-0.03	-0.03	0.23	-0.03	0	-0.25	-0.29	0.01	0.23	0.16	-0.08	-0.12	-0.09	-0.05	-0.01	0.09	0.2	0.12	-0.39	-0.27	-0.27	0.11	-0.12	-0.01	0.02	0.11	0.1	-0.03
Q3UPL0	Sec31a	Protein transport protein Sec31A OS=Mus musculus OX=10090 GN=Sec31a PE=1 SV=2	-7.56e+18	0	103.272	22	21	166	1	21	1	539.4	166	21	0	>sp|Q3UPL0|SC31A_MOUSE Protein transport protein Sec31A OS=Mus musculus OX=10090 GN=Sec31a PE=1 SV=2	-0.13	-0.01	-0.14	-0.13	-0.24	-0.15	-0.19	-0.24	-0.14	-0.23	-0.26	-0.14	-0.1	-0.07	-0.25	-0.06	-0.02	-0.28	-0.35	0.13	0.03	-0.02	-0.03	-0.12	-0.11	-0.13	0	-0.19	-0.22	0.03	-0.15	-0.16	-0.33
F8WIS9	Camk2a	Isoform of P11798, Calcium/calmodulin-dependent protein kinase type II subunit alpha OS=Mus musculus OX=10090 GN=Camk2a PE=1 SV=1	-1.96e+18	0	103.21	29	10	304	0	7	1	1363.89	304	10	0	>tr|F8WIS9|F8WIS9_MOUSE Isoform of P11798, Calcium/calmodulin-dependent protein kinase type II subunit alpha OS=Mus musculus OX=10090 GN=Camk2a PE=1 SV=1	0.37	0.43	0.13	0.02	0.06	0.21	0.01	0.16	-0.36	-0.1	0.34	0.13	0.09	-0.12	-0.15	0.06	0.19	0.38	0.14	-0.34	-0.01	-0.9	-0.23	0.05	0.12	0.25	0.43	0.02	0.02	-0.18	0.2	0.09	0.05
Q9WUA2	Farsb	Phenylalanine--tRNA ligase beta subunit OS=Mus musculus OX=10090 GN=Farsb PE=1 SV=2	8.34e+18	0	103.179	39	21	278	12	21	1	819.12	278	21	0	>sp|Q9WUA2|SYFB_MOUSE Phenylalanine--tRNA ligase beta subunit OS=Mus musculus OX=10090 GN=Farsb PE=1 SV=2	-0.2	-0.41	-0.08	-0.12	0.08	-0.18	-0.05	-0.08	-0.15	0.07	-0.05	0.24	0.02	-0.28	-0.08	-0.02	0.19	0.16	0.01	0	0.25	0.03	-0.06	-0.2	0	0.11	-0.15	0.01	-0.22	-0.29	0.02	-0.13	0.16
P50608	Fmod	Fibromodulin OS=Mus musculus OX=10090 GN=Fmod PE=2 SV=1	-6.76e+18	0	103.154	32	9	329	9	9	1	1243.01	329	9	0	>sp|P50608|FMOD_MOUSE Fibromodulin OS=Mus musculus OX=10090 GN=Fmod PE=2 SV=1	0.39	1.13	-0.14	-0.89	-0.38	-0.25	-0.56	-0.49	-0.89	-0.48	-0.38	0.43	-0.93	-0.31	-0.34	-0.5	-0.58	-1.34	-0.7	-0.5	0.04	-0.37	0.29	-1.44	0.42	-0.09	0.78	-0.3	0.38	-0.43	-0.32	-0.29	-0.07
Q8R2G4	Art3	Ecto-ADP-ribosyltransferase 3 OS=Mus musculus OX=10090 GN=Art3 PE=1 SV=2	-1.23e+18	0	103.13	38	11	188	0	11	1	757.44	188	11	0	>sp|Q8R2G4|NAR3_MOUSE Ecto-ADP-ribosyltransferase 3 OS=Mus musculus OX=10090 GN=Art3 PE=1 SV=2	0.34	0.22	0.19	-0.02	0.34	-0.03	-0.13	-0.06	-0.14	-0.18	0.33	-0.01	0.24	0.11	0.22	-0.11	0.17	0.17	0.04	-0.25	0.05	-0.07	-0.12	0.38	0.43	0.12	0.12	0.25	-0.03	-0.21	-0.15	-0.08	-0.47
Q9WVA4	Tagln2	Transgelin-2 OS=Mus musculus OX=10090 GN=Tagln2 PE=1 SV=4	-5.64e+18	0	103.061	68	12	218	6	12	1	781.53	218	12	0	>sp|Q9WVA4|TAGL2_MOUSE Transgelin-2 OS=Mus musculus OX=10090 GN=Tagln2 PE=1 SV=4	-0.22	-0.09	-0.12	0.13	-0.13	0.17	-0.06	-0.22	0.12	-0.02	-0.15	0.59	-0.05	0.33	0.15	0.07	0.29	-0.08	-0.17	0.57	-0.21	0.03	0.07	0.57	-0.08	0.02	0.41	-0.12	0.01	0.54	-0.06	0.12	-0.21
Q9DB73	Cyb5r1	NADH-cytochrome b5 reductase 1 OS=Mus musculus OX=10090 GN=Cyb5r1 PE=1 SV=1	3.67e+18	0	102.798	56	14	246	4	14	1	826.7	246	14	0	>sp|Q9DB73|NB5R1_MOUSE NADH-cytochrome b5 reductase 1 OS=Mus musculus OX=10090 GN=Cyb5r1 PE=1 SV=1	-0.27	-0.14	0.17	-0.02	-0.01	-0.35	0.12	-0.31	-0.14	0.01	0.11	-0.23	-0.32	-0.35	-0.39	-0.31	-0.24	0.09	0.22	-0.29	0.01	-0.19	-0.25	-0.31	0.03	-0.05	-0.15	0.1	0.07	-0.14	0.19	0.08	-0.03
Q921T2	Tor1aip1	Torsin-1A-interacting protein 1 OS=Mus musculus OX=10090 GN=Tor1aip1 PE=1 SV=3	4.5e+17	0	102.752	45	18	154	1	17	1	559.33	154	18	1	>sp|Q921T2|TOIP1_MOUSE Torsin-1A-interacting protein 1 OS=Mus musculus OX=10090 GN=Tor1aip1 PE=1 SV=3	0.29	0.21	0.11	-0.03	0.29	0.39	-0.07	0.06	0.09	0.17	0.41	0.1	0.09	0.22	0.02	0.06	0.07	0.07	0.08	-0.1	0.03	-0.19	-0.32	0.28	0.29	0.14	0.11	0.08	0.07	0.04	0.04	0.08	0.08
Q03734	Serpina3m	Serine protease inhibitor A3M OS=Mus musculus OX=10090 GN=Serpina3m PE=1 SV=2	3.23e+18	0	102.596	30	12	301	4	4	1	1238.54	301	12	1	>sp|Q03734|SPA3M_MOUSE Serine protease inhibitor A3M OS=Mus musculus OX=10090 GN=Serpina3m PE=1 SV=2	0.04	0.02	0.16	-0.08	-0.17	-0.11	0.04	-0.52	-0.1	0.01	0.27	0.23	-0.11	0.37	0.17	0	-0.34	0.11	-0.19	-0.01	-0.3	-0.37	-0.26	0.55	0.54	-0.03	0.23	0.02	0.19	0.39	-0.01	0.15	-0.11
Q921M7	Fam49b	Protein FAM49B OS=Mus musculus OX=10090 GN=Fam49b PE=1 SV=1	-5.13e+18	0	102.572	56	13	181	2	11	1	627.77	181	13	3	>sp|Q921M7|FA49B_MOUSE Protein FAM49B OS=Mus musculus OX=10090 GN=Fam49b PE=1 SV=1	0.07	-0.55	-0.07	-0.1	0.19	-0.06	-0.18	-0.04	-0.14	-0.07	0.04	-0.02	-0.11	0.03	-0.21	-0.21	-0.03	0.04	0.05	-0.05	0.05	0.11	0.12	-0.07	-0.05	-0.33	0.09	0.11	-0.06	-0.06	-0.09	-0.05	0.06
P53810	Pitpna	Phosphatidylinositol transfer protein alpha isoform OS=Mus musculus OX=10090 GN=Pitpna PE=1 SV=2	1.27e+18	0	102.076	64	17	351	1	14	1	1179.7	351	17	3	>sp|P53810|PIPNA_MOUSE Phosphatidylinositol transfer protein alpha isoform OS=Mus musculus OX=10090 GN=Pitpna PE=1 SV=2	0.19	0.19	0.03	-0.05	0.04	0.12	0	-0.14	-0.04	0.07	0.03	0.03	-0.02	-0.18	-0.13	0.04	0.02	0.36	0.23	-0.23	-0.03	-0.04	-0.2	-0.02	-0.09	-0.09	-0.57	0	-0.15	-0.15	0.02	-0.06	-0.04
P47811	Mapk14	Mitogen-activated protein kinase 14 OS=Mus musculus OX=10090 GN=Mapk14 PE=1 SV=3	-2.52e+18	0	102.023	54	14	242	0	13	1	777.11	242	14	0	>sp|P47811|MK14_MOUSE Mitogen-activated protein kinase 14 OS=Mus musculus OX=10090 GN=Mapk14 PE=1 SV=3	-0.01	0.05	-0.09	-0.18	0.18	-0.33	-0.19	0	-0.3	-0.09	-0.04	-0.36	-0.39	-0.56	-0.33	0.09	0.01	0.01	0.22	-0.5	0.03	0.17	-0.05	-0.32	-0.17	-0.02	-0.25	0.04	-0.02	-0.33	0.01	-0.1	0.14
Q99L45	Eif2s2	Eukaryotic translation initiation factor 2 subunit 2 OS=Mus musculus OX=10090 GN=Eif2s2 PE=1 SV=1	3.75e+18	0	102.02	50	15	172	11	15	1	637.49	172	15	0	>sp|Q99L45|IF2B_MOUSE Eukaryotic translation initiation factor 2 subunit 2 OS=Mus musculus OX=10090 GN=Eif2s2 PE=1 SV=1	0.2	0.13	0.13	0.16	0.09	0.13	0.08	0.09	0.03	-0.03	0.06	0.07	0.08	-0.12	0.16	0.28	-0.01	0.47	0.11	-0.04	-0.17	-0.15	-0.22	0.42	-0.11	0.38	-0.51	-0.01	-0.06	-0.02	0.06	-0.01	-0.02
P63330	Ppp2ca	Serine/threonine-protein phosphatase 2A catalytic subunit alpha isoform OS=Mus musculus OX=10090 GN=Ppp2ca PE=1 SV=1	8.82e+18	0	101.924	51	11	220	1	11	1	1102.12	220	11	0	>sp|P63330|PP2AA_MOUSE Serine/threonine-protein phosphatase 2A catalytic subunit alpha isoform OS=Mus musculus OX=10090 GN=Ppp2ca PE=1 SV=1	0.15	0.03	0.09	-0.13	0.06	-0.09	0.06	0.06	0.03	0.01	0.17	0.05	-0.14	-0.04	-0.3	-0.01	0.19	0.11	0.13	-0.13	0.1	-0.12	0	-0.28	0.16	-0.06	0.27	0.09	0.03	-0.16	0.05	-0.03	0.21
G3X8T7	Scn4a	Isoform of Q9ER60, Sodium channel protein OS=Mus musculus OX=10090 GN=Scn4a PE=3 SV=1	-2.73e+18	0	101.844	11	16	163	0	16	1	573.38	163	16	0	>tr|G3X8T7|G3X8T7_MOUSE Isoform of Q9ER60, Sodium channel protein OS=Mus musculus OX=10090 GN=Scn4a PE=3 SV=1	0.13	0.16	0.13	0.07	0.07	0.03	-0.1	0.07	-0.18	-0.03	0.18	0.04	-0.01	-0.2	-0.11	-0.07	-0.07	0.4	0.24	-0.35	-0.1	-0.05	-0.28	-0.09	-0.07	0.1	-0.44	-0.03	-0.16	-0.33	-0.06	-0.2	0.03
Q9CQC9	Sar1b	GTP-binding protein SAR1b OS=Mus musculus OX=10090 GN=Sar1b PE=1 SV=1	6.51e+18	0	101.763	72	9	399	6	6	1	1473.69	399	9	0	>sp|Q9CQC9|SAR1B_MOUSE GTP-binding protein SAR1b OS=Mus musculus OX=10090 GN=Sar1b PE=1 SV=1	0.34	0.23	0.13	-0.03	0.11	0.11	0.16	0.1	0.02	0.06	0.26	0.05	-0.05	-0.14	-0.07	-0.21	-0.05	0.16	0.15	-0.14	0.15	-0.25	-0.35	0.14	0.07	0.07	0.19	0.02	0.08	-0.08	0.33	0.04	0.27
Q9CR16	Ppid	Peptidyl-prolyl cis-trans isomerase D OS=Mus musculus OX=10090 GN=Ppid PE=1 SV=3	-5.81e+18	0	101.724	55	17	186	13	16	1	607.82	186	17	0	>sp|Q9CR16|PPID_MOUSE Peptidyl-prolyl cis-trans isomerase D OS=Mus musculus OX=10090 GN=Ppid PE=1 SV=3	-0.27	-0.17	-0.16	-0.26	-0.08	0	0.02	0.01	-0.08	-0.04	-0.17	-0.01	-0.22	-0.23	-0.3	-0.01	-0.08	-0.17	0.11	-0.15	-0.23	0.07	0.2	-0.08	-0.22	0.08	-0.01	-0.31	0.11	0.03	0.04	-0.1	-0.08
Q9WTP7	Ak3	GTP:AMP phosphotransferase AK3, mitochondrial OS=Mus musculus OX=10090 GN=Ak3 PE=1 SV=3	-6.46e+18	0	101.68	80	16	231	12	16	1	745.15	231	16	0	>sp|Q9WTP7|KAD3_MOUSE GTP:AMP phosphotransferase AK3, mitochondrial OS=Mus musculus OX=10090 GN=Ak3 PE=1 SV=3	-0.17	-0.09	0.03	0.19	0.16	0.27	0.03	0.15	0.27	0.02	0.02	0.09	0.38	0.38	0.74	0.46	0.11	-0.1	-0.03	0.26	0.13	0.1	0.17	0.32	0.09	-0.01	0.15	0.09	0.01	0.31	-0.04	0.25	0.06
G3X981	Prph	Isoform of P15331, Peripherin OS=Mus musculus OX=10090 GN=Prph PE=1 SV=1	6.49e+18	0	101.644	41	20	313	0	17	1	1006.08	313	20	0	>tr|G3X981|G3X981_MOUSE Isoform of P15331, Peripherin OS=Mus musculus OX=10090 GN=Prph PE=1 SV=1	0.41	-1.38	0.1	-0.09	-0.42	0.01	-0.2	-0.21	0.2	-0.09	0.09	0.29	-0.19	-0.22	-0.13	-0.08	-0.18	0.15	0.98	-0.43	-0.03	-0.27	-0.1	-0.03	0.07	-0.58	-0.95	-0.27	-0.15	-0.52	-0.78	-0.71	-0.19
Q99PT1	Arhgdia	Rho GDP-dissociation inhibitor 1 OS=Mus musculus OX=10090 GN=Arhgdia PE=1 SV=3	-3.88e+18	0	101.172	57	12	238	12	12	1	828.6	238	12	0	>sp|Q99PT1|GDIR1_MOUSE Rho GDP-dissociation inhibitor 1 OS=Mus musculus OX=10090 GN=Arhgdia PE=1 SV=3	0.19	0.29	0	-0.02	-0.01	0.1	0.01	-0.07	0.1	0.05	0.05	0.08	-0.01	0.22	0.12	0.12	0.07	-0.05	0.03	0.03	-0.12	-0.06	-0.05	0.43	0.12	0.09	-0.02	-0.02	0.02	0.18	-0.01	0.03	-0.02
Q9JKB1	Uchl3	Ubiquitin carboxyl-terminal hydrolase isozyme L3 OS=Mus musculus OX=10090 GN=Uchl3 PE=1 SV=2	8.28e+18	0	101.138	59	10	177	0	10	1	551.36	177	10	0	>sp|Q9JKB1|UCHL3_MOUSE Ubiquitin carboxyl-terminal hydrolase isozyme L3 OS=Mus musculus OX=10090 GN=Uchl3 PE=1 SV=2	-0.01	-0.08	-0.07	-0.02	0.04	-0.02	0.01	0.4	0.1	0.14	-0.01	-0.05	-0.04	-0.09	-0.08	-0.05	0.08	-0.08	-0.09	-0.16	-0.18	-0.02	-0.01	-0.18	-0.18	-0.03	-0.21	0.06	-0.04	-0.1	0.07	0.02	0.16
P62932	Fbxo40	F-box only protein 40 OS=Mus musculus OX=10090 GN=Fbxo40 PE=1 SV=1	-5.31e+18	0	101.109	33	20	154	20	20	1	457.61	154	20	0	>sp|P62932|FBX40_MOUSE F-box only protein 40 OS=Mus musculus OX=10090 GN=Fbxo40 PE=1 SV=1	-0.03	-0.13	0.03	0	-0.26	-0.15	-0.1	0.09	-0.08	0.19	-0.07	-0.28	-0.09	-0.26	-0.36	-0.11	-0.18	0.02	-0.08	-0.34	-0.11	-0.26	-0.3	-0.25	-0.18	0.07	-0.2	-0.17	-0.2	-0.42	-0.06	-0.18	-0.03
P48774	Gstm5	Glutathione S-transferase Mu 5 OS=Mus musculus OX=10090 GN=Gstm5 PE=1 SV=1	-7.23e+18	0	100.984	68	14	279	0	12	1	906.26	279	14	0	>sp|P48774|GSTM5_MOUSE Glutathione S-transferase Mu 5 OS=Mus musculus OX=10090 GN=Gstm5 PE=1 SV=1	0.32	-0.06	-0.04	-0.23	0.12	-0.07	-0.04	-0.06	-0.22	-0.07	-0.02	-0.3	-0.35	-0.37	-0.24	-0.2	-0.08	0.02	0.2	-0.83	-0.4	-0.15	-0.31	-0.12	-0.11	0.34	-0.66	-0.17	-0.17	-0.74	-0.03	-0.51	-0.04
Q8R1G2	Cmbl	Carboxymethylenebutenolidase homolog OS=Mus musculus OX=10090 GN=Cmbl PE=1 SV=1	1.45e+17	0	100.943	62	15	329	5	15	1	1089.58	329	15	0	>sp|Q8R1G2|CMBL_MOUSE Carboxymethylenebutenolidase homolog OS=Mus musculus OX=10090 GN=Cmbl PE=1 SV=1	0.29	0.23	0.2	0.13	-0.01	0.32	-0.07	0.43	-0.16	-0.02	0.1	-0.02	0.13	0.23	0.11	0.08	0.22	0.16	0.11	-0.71	-0.69	0.04	-0.05	-0.03	-0.11	-0.06	-0.58	0.15	-0.05	-0.14	0.12	0.03	-0.34
A6X935	Itih4	Inter alpha-trypsin inhibitor, heavy chain 4 OS=Mus musculus OX=10090 GN=Itih4 PE=1 SV=2	2.11e+18	0	100.885	25	19	141	0	19	1	470.77	141	19	0	>sp|A6X935|ITIH4_MOUSE Inter alpha-trypsin inhibitor, heavy chain 4 OS=Mus musculus OX=10090 GN=Itih4 PE=1 SV=2	-0.44	-0.14	-0.22	-0.41	-0.01	0	0.03	-0.26	0.18	0.16	-0.1	0.25	-0.6	-0.14	-0.11	0.16	-0.12	-0.06	-0.29	0.83	0.27	0.19	0.29	0.18	-0.04	-0.08	0.44	0.01	-0.05	0.06	-0.23	-0.2	0.03
Q9QZQ8-2	H2afy	Isoform of Q9QZQ8, Isoform 1 of Core histone macro-H2A.1 OS=Mus musculus OX=10090 GN=H2afy	-3.75e+18	0	100.73	53	14	312	1	1	1	1227.97	312	14	0	>sp|Q9QZQ8-2|H2AY_MOUSE Isoform of Q9QZQ8, Isoform 1 of Core histone macro-H2A.1 OS=Mus musculus OX=10090 GN=H2afy	0.21	0.15	-0.05	NaN	0.27	-0.17	0.19	0.19	0.12	0.04	0.32	NaN	0.11	-0.35	NaN	-0.16	-0.03	NaN	-2.12	0.13	0.26	NaN	-0.03	0.39	0.46	-0.07	-0.15	0.08	0.18	0.1	0.03	0.21	0.04
P70296	Pebp1	Phosphatidylethanolamine-binding protein 1 OS=Mus musculus OX=10090 GN=Pebp1 PE=1 SV=3	-3.4e+18	0	100.699	75	9	384	1	9	1	1603.92	384	9	0	>sp|P70296|PEBP1_MOUSE Phosphatidylethanolamine-binding protein 1 OS=Mus musculus OX=10090 GN=Pebp1 PE=1 SV=3	0.19	0.2	0.04	0.04	0.07	0.22	0	0.21	0.1	0.13	0.12	-0.09	-0.03	0.06	0.07	0.13	0.02	0.08	0.19	-0.14	-0.02	-0.03	0.01	0.01	0.06	0	-0.15	0.07	0.02	-0.01	0.11	0.19	0
P62141	Ppp1cb	Serine/threonine-protein phosphatase PP1-beta catalytic subunit OS=Mus musculus OX=10090 GN=Ppp1cb PE=1 SV=3	4.69e+18	0	100.656	59	15	219	5	5	1	741.16	219	15	10	>sp|P62141|PP1B_MOUSE Serine/threonine-protein phosphatase PP1-beta catalytic subunit OS=Mus musculus OX=10090 GN=Ppp1cb PE=1 SV=3	0.04	-0.21	0	-0.18	0	-0.37	0.07	0.09	-0.33	-0.05	0.3	-0.22	-0.26	-0.45	-0.82	-0.18	0.35	0.14	0.21	-0.45	0.05	-0.04	-0.23	-0.96	-0.06	-0.18	-0.15	0.07	-0.03	-0.55	0.1	-0.31	0.11
Q91VR2	Atp5f1c	ATP synthase subunit gamma, mitochondrial OS=Mus musculus OX=10090 GN=Atp5f1c PE=1 SV=1	1.61e+18	0	100.633	38	11	969	0	1	1	2883.97	969	11	0	>sp|Q91VR2|ATPG_MOUSE ATP synthase subunit gamma, mitochondrial OS=Mus musculus OX=10090 GN=Atp5f1c PE=1 SV=1	-0.12	-0.44	0.08	0.26	-0.15	NaN	0.03	-0.1	0.27	-0.05	0.01	0.67	0.41	0.69	0.67	0.39	NaN	-0.17	-0.32	1.12	0.15	0.13	-0.16	0.7	0	NaN	0.43	0.03	0	0.48	-0.09	0.22	-0.1
Q6PAM0	Prkab2	5'-AMP-activated protein kinase subunit beta-2 OS=Mus musculus OX=10090 GN=Prkab2 PE=1 SV=1	-1.49e+18	0	100.531	56	12	190	2	10	1	735.31	190	12	2	>sp|Q6PAM0|AAKB2_MOUSE 5'-AMP-activated protein kinase subunit beta-2 OS=Mus musculus OX=10090 GN=Prkab2 PE=1 SV=1	0.24	0.18	0.01	0.16	0.09	0.12	-0.04	0.04	-0.01	-0.01	0.08	0.04	-0.14	-0.34	-0.02	0.04	0.15	0.43	0.26	-0.21	0	0.03	-0.08	-0.07	-0.11	-0.41	-0.32	0	0.03	-0.05	0.16	0.01	0.11
Q8VED5	Krt79	Keratin, type II cytoskeletal 79 OS=Mus musculus OX=10090 GN=Krt79 PE=1 SV=2	-1.16e+18	0	100.009	43	20	194	14	14	1	625.89	194	20	0	>sp|Q8VED5|K2C79_MOUSE Keratin, type II cytoskeletal 79 OS=Mus musculus OX=10090 GN=Krt79 PE=1 SV=2	-0.37	0.39	-0.28	-0.54	-0.04	1.57	-1	0.44	-0.98	-1.34	-0.74	1.37	0.83	0.26	-0.65	-1.02	-0.12	-1.01	-0.96	2.23	-0.67	-1.8	-0.43	-0.73	-0.59	-0.4	-0.38	0.65	0.06	-0.4	0.42	-0.34	-0.31
Q91WM2	Hdhd5	Haloacid dehalogenase-like hydrolase domain-containing 5 OS=Mus musculus OX=10090 GN=Hdhd5 PE=1 SV=1	3.5e+18	0	99.815	44	14	168	14	14	1	641.37	168	14	0	>sp|Q91WM2|HDHD5_MOUSE Haloacid dehalogenase-like hydrolase domain-containing 5 OS=Mus musculus OX=10090 GN=Hdhd5 PE=1 SV=1	0	0.12	0.11	0.15	-0.14	-0.8	0.16	0.35	0.19	0.29	-0.28	-0.45	-0.35	-0.28	-0.36	-0.28	-0.29	0.08	0.4	-0.33	-0.26	0.23	0.28	-0.09	-0.16	-0.06	-0.02	0.5	-0.02	-0.27	-0.03	-0.08	0.38
E9QKH0	Clasp1	Isoform of Q80TV8, CLIP-associating protein 1 OS=Mus musculus OX=10090 GN=Clasp1 PE=1 SV=1	-2.42e+18	0	99.811	16	19	122	0	17	1	421.81	122	19	2	>tr|E9QKH0|E9QKH0_MOUSE Isoform of Q80TV8, CLIP-associating protein 1 OS=Mus musculus OX=10090 GN=Clasp1 PE=1 SV=1	0.13	-0.08	0.02	-0.06	-0.04	-0.13	0.06	-0.05	0.02	0.02	0.08	0.04	-0.06	0.29	0	-0.09	-0.08	0.08	0.16	0.03	0.32	0.15	0.06	-0.04	0.15	-0.02	0.31	0.07	-0.13	-0.02	-0.05	-0.08	0.17
Q8R3B1	Plcd1	1-phosphatidylinositol 4,5-bisphosphate phosphodiesterase delta-1 OS=Mus musculus OX=10090 GN=Plcd1 PE=1 SV=2	7.23e+18	0	99.758	30	15	91	0	15	1	362.82	91	15	0	>sp|Q8R3B1|PLCD1_MOUSE 1-phosphatidylinositol 4,5-bisphosphate phosphodiesterase delta-1 OS=Mus musculus OX=10090 GN=Plcd1 PE=1 SV=2	-0.21	0.14	-0.11	-0.02	0	-0.1	-0.05	-0.29	-0.31	0.41	-0.03	0.01	0.06	0.03	0.1	0.01	-0.14	-0.14	0.11	-0.01	-0.16	-0.21	0.19	-0.05	-0.08	-0.08	0.03	-0.19	0.02	-0.07	-0.07	-0.1	-0.18
Q9CQ62	Decr1	2,4-dienoyl-CoA reductase, mitochondrial OS=Mus musculus OX=10090 GN=Decr1 PE=1 SV=1	1.41e+18	0	99.672	42	12	346	12	12	1	1242.03	346	12	0	>sp|Q9CQ62|DECR_MOUSE 2,4-dienoyl-CoA reductase, mitochondrial OS=Mus musculus OX=10090 GN=Decr1 PE=1 SV=1	-0.23	-0.06	-0.04	0.1	0.06	0.05	0.11	0.25	0.49	0.24	0.05	-0.1	0.37	0.36	0.72	0.51	0.02	0	0.28	-0.09	-0.04	0.09	-0.18	0.12	0.13	0.19	-0.22	0.01	0.05	0.25	-0.07	0.27	-0.1
P47962	Rpl5	60S ribosomal protein L5 OS=Mus musculus OX=10090 GN=Rpl5 PE=1 SV=3	-5.75e+18	0	99.634	35	12	235	4	12	1	738.85	235	12	0	>sp|P47962|RL5_MOUSE 60S ribosomal protein L5 OS=Mus musculus OX=10090 GN=Rpl5 PE=1 SV=3	0.04	0.09	-0.06	0.01	-0.08	-0.07	-0.04	-0.1	0.03	-0.01	-0.15	-0.03	0	-0.04	-0.05	-0.08	0.06	0.06	-0.02	0.22	0.04	0.09	0.05	0.22	0.03	0.04	0.09	-0.14	0.02	0.09	0.02	0.03	0.05
G3X9Q1	Itga7	Isoform of Q61738, Integrin alpha-7 OS=Mus musculus OX=10090 GN=Itga7 PE=1 SV=1	-6.45e+17	0	99.618	18	15	170	0	1	1	577.74	170	15	14	>tr|G3X9Q1|G3X9Q1_MOUSE Isoform of Q61738, Integrin alpha-7 OS=Mus musculus OX=10090 GN=Itga7 PE=1 SV=1	0.06	-0.03	0.16	0.03	0.19	0	-0.03	-0.13	0.22	-0.04	0.22	0	-0.15	0.03	0.07	-0.05	-0.06	-0.07	-0.12	-0.03	0.11	-0.03	-0.15	-0.04	0.28	-0.15	-0.28	0.09	-0.01	-0.1	0.01	0.06	0.01
A0A0N4SVU1	Gm7298	Predicted gene 7298 OS=Mus musculus OX=10090 GN=Gm7298 PE=4 SV=1	5.26e+18	0	99.553	14	15	183	1	1	1	559.98	183	15	0	>tr|A0A0N4SVU1|A0A0N4SVU1_MOUSE Predicted gene 7298 OS=Mus musculus OX=10090 GN=Gm7298 PE=4 SV=1	NaN	NaN	NaN	NaN	NaN	NaN	NaN	NaN	NaN	NaN	NaN	NaN	NaN	NaN	NaN	NaN	NaN	NaN	NaN	NaN	NaN	NaN	NaN	NaN	NaN	NaN	NaN	NaN	NaN	NaN	NaN	NaN	NaN
Q91VM9	Ppa2	Inorganic pyrophosphatase 2, mitochondrial OS=Mus musculus OX=10090 GN=Ppa2 PE=1 SV=1	-4.17e+18	0	99.542	50	13	190	0	13	1	716.12	190	13	0	>sp|Q91VM9|IPYR2_MOUSE Inorganic pyrophosphatase 2, mitochondrial OS=Mus musculus OX=10090 GN=Ppa2 PE=1 SV=1	-0.24	-0.34	-0.15	-0.06	0.02	-0.12	-0.05	0.19	0	-0.09	-0.14	-0.32	-0.17	-0.2	0.14	0.11	-0.19	-0.18	0.04	-0.09	-0.06	0.05	-0.09	-0.08	-0.07	0.01	-0.02	-0.01	-0.04	0.14	-0.14	0.05	-0.14
Q00623	Apoa1	Apolipoprotein A-I OS=Mus musculus OX=10090 GN=Apoa1 PE=1 SV=2	2.63e+18	0	99.525	63	15	391	12	15	1	1182.26	391	15	0	>sp|Q00623|APOA1_MOUSE Apolipoprotein A-I OS=Mus musculus OX=10090 GN=Apoa1 PE=1 SV=2	-0.15	-0.12	-0.13	-0.25	-0.49	-0.39	-0.4	-0.18	-0.19	-0.4	-0.75	-0.54	-0.43	-0.16	0.09	0.03	-0.18	-0.16	-0.57	0.85	0.11	-0.24	-0.15	0.06	-0.22	0.01	0.15	-0.23	-0.22	0.08	-0.24	-0.09	-0.41
Q6P549	Inppl1	Phosphatidylinositol 3,4,5-trisphosphate 5-phosphatase 2 OS=Mus musculus OX=10090 GN=Inppl1 PE=1 SV=1	-2.06e+17	0	99.434	25	24	153	1	24	1	480.53	153	24	0	>sp|Q6P549|SHIP2_MOUSE Phosphatidylinositol 3,4,5-trisphosphate 5-phosphatase 2 OS=Mus musculus OX=10090 GN=Inppl1 PE=1 SV=1	-0.16	-0.01	0.09	0.09	-0.12	-0.24	0	0.12	-0.14	-0.22	0.06	0.03	0.04	-0.15	-0.14	0.11	0.06	-0.11	-0.09	-0.09	0.03	-0.15	-0.31	-0.28	0.02	-0.19	-0.01	-0.11	0.1	0.06	0.13	0.07	0.19
P61205	Arf3	ADP-ribosylation factor 3 OS=Mus musculus OX=10090 GN=Arf3 PE=2 SV=2	-7.52e+18	0	99.365	55	9	234	0	1	1	811.57	234	9	11	>sp|P61205|ARF3_MOUSE ADP-ribosylation factor 3 OS=Mus musculus OX=10090 GN=Arf3 PE=2 SV=2	0.08	0.07	-0.02	-0.03	0.02	0.26	-0.1	-0.01	-0.12	-0.07	0.04	0.07	0.02	-0.1	-0.05	-0.01	0.09	0.17	0.04	-0.07	0.05	-0.12	0.29	0.17	0.02	0.43	-0.09	0.03	-0.08	-0.08	0.02	0	0.07
Q8VIJ6	Sfpq	Splicing factor, proline- and glutamine-rich OS=Mus musculus OX=10090 GN=Sfpq PE=1 SV=1	-7.34e+18	0	99.02	27	17	152	16	16	1	541.75	152	17	1	>sp|Q8VIJ6|SFPQ_MOUSE Splicing factor, proline- and glutamine-rich OS=Mus musculus OX=10090 GN=Sfpq PE=1 SV=1	0.28	0.17	0.07	-0.05	0.03	0.38	0.03	-0.1	0.06	0.07	-0.01	0.16	0.11	0.31	0	-0.1	0.06	-0.17	-0.35	0.11	0.09	0.05	0.07	0.25	0.27	0.1	0.42	0.05	-0.08	0.48	-0.13	0.07	-0.03
A2AKU9	Atp5c1	Isoform of Q91VR2, ATP synthase subunit gamma OS=Mus musculus OX=10090 GN=Atp5c1 PE=1 SV=1	4.76e+18	0	99.018	38	11	1018	1	1	1	3003.21	1018	11	14	>tr|A2AKU9|A2AKU9_MOUSE Isoform of Q91VR2, ATP synthase subunit gamma OS=Mus musculus OX=10090 GN=Atp5c1 PE=1 SV=1	-0.47	-0.49	-0.03	0.04	-0.15	-0.36	0.08	0.12	0.1	-0.07	0.04	-0.18	0	0	0.35	-0.27	-0.37	-0.19	0.12	-0.02	0.12	0.12	0.05	-0.05	0.16	0.16	0.04	0.21	-0.32	-0.31	-0.33	-0.31	0.11
Q8BH80	Vapb	Isoform of Q9QY76, Vesicle-associated membrane protein, associated protein B and C OS=Mus musculus OX=10090 GN=Vapb PE=1 SV=1	8.94e+17	0	98.826	53	12	313	0	11	1	1013.64	313	12	1	>tr|Q8BH80|Q8BH80_MOUSE Isoform of Q9QY76, Vesicle-associated membrane protein, associated protein B and C OS=Mus musculus OX=10090 GN=Vapb PE=1 SV=1	0.29	0.47	0.16	0.13	0.11	0.15	-0.02	0.16	0.07	0.01	0.24	0.01	0.07	0.18	0.25	0.14	-0.02	0.09	0.09	-0.05	0.03	-0.05	-0.07	0.08	0.17	0.3	0.19	0.09	-0.01	0	0.06	0.08	0.05
Q8R1S0	Coq6	Ubiquinone biosynthesis monooxygenase COQ6, mitochondrial OS=Mus musculus OX=10090 GN=Coq6 PE=1 SV=3	-8.09e+18	0	98.739	51	16	180	5	16	1	567.89	180	16	0	>sp|Q8R1S0|COQ6_MOUSE Ubiquinone biosynthesis monooxygenase COQ6, mitochondrial OS=Mus musculus OX=10090 GN=Coq6 PE=1 SV=3	-0.29	-0.13	-0.04	-0.04	-0.01	-0.07	0.05	0.11	0.14	-0.02	-0.14	-0.23	-0.14	0.17	0.15	-0.26	-0.08	0	-0.01	-0.15	0.03	-0.05	0.17	-0.02	-0.06	-0.04	0.35	0.14	-0.06	-0.01	-0.03	0.11	0.15
Q61738-2	Itga7	Isoform of Q61738, Isoform Alpha-7X1A of Integrin alpha-7 OS=Mus musculus OX=10090 GN=Itga7	1.56e+18	0	98.285	19	15	156	0	1	1	532.54	156	15	1	>sp|Q61738-2|ITA7_MOUSE Isoform of Q61738, Isoform Alpha-7X1A of Integrin alpha-7 OS=Mus musculus OX=10090 GN=Itga7	-0.32	-0.06	NaN	NaN	0	NaN	NaN	-0.42	NaN	NaN	NaN	NaN	0.07	NaN	NaN	0.08	-0.11	NaN	NaN	NaN	0.34	-0.1	NaN	NaN	-0.16	-0.08	NaN	-0.39	NaN	-0.6	NaN	-0.52	-0.07
P17742	Ppia	Peptidyl-prolyl cis-trans isomerase A OS=Mus musculus OX=10090 GN=Ppia PE=1 SV=2	9.48e+17	0	98.236	65	10	406	0	9	1	1180.11	406	10	0	>sp|P17742|PPIA_MOUSE Peptidyl-prolyl cis-trans isomerase A OS=Mus musculus OX=10090 GN=Ppia PE=1 SV=2	0.38	0.41	-0.02	0.02	0.11	0.43	0.23	-0.08	0.31	0.35	0.21	0.47	0.22	0.35	0.35	0.27	0.28	0.35	0.33	0.21	-0.19	-0.02	0.11	0.68	0.22	0.06	0.02	-0.01	0.08	0.36	0.15	0.24	0.03
P68181	Prkacb	cAMP-dependent protein kinase catalytic subunit beta OS=Mus musculus OX=10090 GN=Prkacb PE=1 SV=2	6.55e+18	0	98.206	43	15	263	2	8	1	848.61	263	15	7	>sp|P68181|KAPCB_MOUSE cAMP-dependent protein kinase catalytic subunit beta OS=Mus musculus OX=10090 GN=Prkacb PE=1 SV=2	0.04	0	0.1	0.01	-0.05	0.02	0.03	0.12	0.01	0.08	0.01	-0.09	-0.09	-0.09	-0.02	-0.09	-0.04	-0.02	0.01	-0.11	-0.02	-0.12	-0.14	0.03	-0.02	0.26	-0.28	0.09	0.03	-0.07	0.08	0.02	-0.06
P32067	Ssb	Lupus La protein homolog OS=Mus musculus OX=10090 GN=Ssb PE=1 SV=1	-8.09e+18	0	98.19	40	17	171	2	17	1	502.4	171	17	0	>sp|P32067|LA_MOUSE Lupus La protein homolog OS=Mus musculus OX=10090 GN=Ssb PE=1 SV=1	0.05	0.07	0.07	0	0.01	0.07	0.02	0.07	0.13	-0.02	-0.12	0.16	0.13	0.23	0.14	0.06	0.2	-0.02	-0.1	0.39	0.15	-0.07	-0.05	0.68	0.28	0.18	0.17	0.25	0	0.54	-0.09	0.11	0.04
Q9R0X4	Acot9	Acyl-coenzyme A thioesterase 9, mitochondrial OS=Mus musculus OX=10090 GN=Acot9 PE=1 SV=1	3.88e+18	0	98.169	40	15	200	7	15	1	584.36	200	15	0	>sp|Q9R0X4|ACOT9_MOUSE Acyl-coenzyme A thioesterase 9, mitochondrial OS=Mus musculus OX=10090 GN=Acot9 PE=1 SV=1	-0.11	0.04	0.1	0.04	0.1	0.26	0.34	-0.12	0.3	0.4	0.1	0.14	0.14	-0.01	0.19	0.1	-0.05	-0.26	-0.15	0.09	0.2	-0.04	0.13	0.3	0.22	0.2	0.2	0.04	-0.05	0.04	0.03	0.01	0.19
Q7TPV4	Mybbp1a	Myb-binding protein 1A OS=Mus musculus OX=10090 GN=Mybbp1a PE=1 SV=2	8.64e+18	0	98.162	18	20	140	20	20	1	402.31	140	20	0	>sp|Q7TPV4|MBB1A_MOUSE Myb-binding protein 1A OS=Mus musculus OX=10090 GN=Mybbp1a PE=1 SV=2	0.14	0.02	0	-0.02	-0.04	-0.13	0.03	0.05	0.14	0.02	-0.02	0	0.08	0.02	-0.12	-0.12	0.13	-0.09	-0.14	0.21	0.02	-0.11	0.07	0.29	0.04	-0.07	-0.02	0.04	0.03	0.09	-0.15	-0.11	-0.02
E9Q9K5	Trdn	Triadin OS=Mus musculus OX=10090 GN=Trdn PE=1 SV=1	8.14e+18	0	98.147	21	20	513	9	20	1	1319.93	513	20	0	>sp|E9Q9K5|TRDN_MOUSE Triadin OS=Mus musculus OX=10090 GN=Trdn PE=1 SV=1	0.33	0.41	0.16	0.05	-0.03	0.15	-0.13	0.12	-0.1	-0.07	0.17	0.07	-0.09	-0.14	0.05	0.01	-0.13	0.35	0.25	-0.17	0.08	-0.17	-0.28	0.2	0.01	0.27	-0.26	-0.04	-0.17	-0.15	-0.08	-0.05	-0.11
G5E895	Akr1b10	Aldo-keto reductase family 1, member B10 (aldose reductase) OS=Mus musculus OX=10090 GN=Akr1b10 PE=1 SV=1	-1.31e+18	0	98.084	63	16	352	0	9	1	1159.35	352	16	7	>tr|G5E895|G5E895_MOUSE Aldo-keto reductase family 1, member B10 (aldose reductase) OS=Mus musculus OX=10090 GN=Akr1b10 PE=1 SV=1	-0.09	0.08	0	0.04	0.09	-0.1	0	0.09	0.08	-0.03	0.11	0.01	-0.03	-0.1	-0.03	0.09	0.12	0.29	0.39	-0.34	-0.06	0.17	0.07	-0.38	0.02	-0.16	0.05	0.05	0.05	-0.07	0.13	0.11	0.05
Q8BHN3-2	Ganab	Isoform of Q8BHN3, Isoform 2 of Neutral alpha-glucosidase AB OS=Mus musculus OX=10090 GN=Ganab	-1.63e+18	0	98.014	25	19	141	0	19	1	425.55	141	19	0	>sp|Q8BHN3-2|GANAB_MOUSE Isoform of Q8BHN3, Isoform 2 of Neutral alpha-glucosidase AB OS=Mus musculus OX=10090 GN=Ganab	-0.06	-0.12	-0.11	-0.08	-0.2	0	0	0.01	0.08	0.03	-0.16	0.03	-0.03	0.16	0.06	-0.11	0.01	-0.07	-0.17	0.22	0.09	0.27	0.17	0.09	0	-0.22	0.32	0.09	0.02	0.27	0.03	0.25	-0.07
Q8BMK4	Ckap4	Cytoskeleton-associated protein 4 OS=Mus musculus OX=10090 GN=Ckap4 PE=1 SV=2	5.28e+18	0	97.964	40	21	156	21	21	1	552.93	156	21	0	>sp|Q8BMK4|CKAP4_MOUSE Cytoskeleton-associated protein 4 OS=Mus musculus OX=10090 GN=Ckap4 PE=1 SV=2	0.03	-0.05	-0.3	-0.48	-0.28	-0.26	-0.18	-0.53	-0.25	-0.34	-0.61	-0.23	-0.3	-0.65	-0.96	-0.06	-0.1	-0.51	-0.63	-0.1	-0.14	-0.03	0.12	-0.37	-0.18	0.16	-0.02	-0.45	-0.41	-0.22	-0.39	-0.41	-0.05
P70266	Pfkfb1	6-phosphofructo-2-kinase/fructose-2,6-bisphosphatase 1 OS=Mus musculus OX=10090 GN=Pfkfb1 PE=1 SV=2	4.57e+18	0	97.944	48	21	178	0	21	1	532.03	178	21	0	>sp|P70266|F261_MOUSE 6-phosphofructo-2-kinase/fructose-2,6-bisphosphatase 1 OS=Mus musculus OX=10090 GN=Pfkfb1 PE=1 SV=2	0.08	0.16	0.15	0.24	0.37	0.11	0.06	-0.01	0.09	0.05	0.14	0.01	-0.04	-0.1	0.05	0.21	0.16	0.24	0.37	-0.02	0.18	-0.24	-0.44	-0.11	0.07	0.03	0.21	0.12	0.21	0.15	0.17	0.17	-0.08
Q8C0M9	Asrgl1	Isoaspartyl peptidase/L-asparaginase OS=Mus musculus OX=10090 GN=Asrgl1 PE=1 SV=1	-5.74e+18	0	97.903	47	12	205	12	12	1	675	205	12	0	>sp|Q8C0M9|ASGL1_MOUSE Isoaspartyl peptidase/L-asparaginase OS=Mus musculus OX=10090 GN=Asrgl1 PE=1 SV=1	-0.16	-0.2	-0.06	-0.2	0.27	0.29	0.36	0.11	0.4	0.54	0.4	0.26	0.3	0.11	0.19	0.11	0.11	-0.09	-0.14	0.3	0.47	0.04	0.14	0.21	0.26	0.05	-0.05	0.03	0.16	-0.01	0.24	0.13	-0.04
Q91VH6	Memo1	Protein MEMO1 OS=Mus musculus OX=10090 GN=Memo1 PE=1 SV=1	8.32e+17	0	97.717	64	11	102	11	11	1	375.22	102	11	0	>sp|Q91VH6|MEMO1_MOUSE Protein MEMO1 OS=Mus musculus OX=10090 GN=Memo1 PE=1 SV=1	0.11	-0.19	0.08	-0.06	0.05	0.19	0.24	0.01	0.17	0.3	-0.05	0.07	-0.04	-0.21	-0.22	-0.18	0.07	-0.07	-0.13	-0.2	0.02	-0.06	-0.23	-0.22	-0.1	0.05	-0.4	0.04	-0.11	-0.16	-0.04	-0.08	0.25
O70310	Nmt1	Glycylpeptide N-tetradecanoyltransferase 1 OS=Mus musculus OX=10090 GN=Nmt1 PE=1 SV=1	2.98e+18	0	97.654	33	11	131	9	11	1	545.69	131	11	0	>sp|O70310|NMT1_MOUSE Glycylpeptide N-tetradecanoyltransferase 1 OS=Mus musculus OX=10090 GN=Nmt1 PE=1 SV=1	-0.13	-0.04	-0.08	0.03	-0.02	-0.07	-0.15	0.01	-0.15	-0.09	-0.16	-0.07	-0.05	-0.26	-0.22	0.07	0.01	-0.19	-0.07	-0.1	0.03	-0.08	0.14	-0.19	-0.12	-0.01	0.2	-0.13	-0.04	-0.02	0.01	-0.04	-0.03
O88569-3	Hnrnpa2b1	Isoform of O88569, Isoform 3 of Heterogeneous nuclear ribonucleoproteins A2/B1 OS=Mus musculus OX=10090 GN=Hnrnpa2b1	-8.86e+18	0	97.533	66	16	433	1	1	1	1373.46	433	16	0	>sp|O88569-3|ROA2_MOUSE Isoform of O88569, Isoform 3 of Heterogeneous nuclear ribonucleoproteins A2/B1 OS=Mus musculus OX=10090 GN=Hnrnpa2b1	NaN	NaN	NaN	NaN	NaN	NaN	NaN	NaN	NaN	NaN	NaN	NaN	NaN	NaN	NaN	NaN	-0.04	NaN	NaN	NaN	NaN	NaN	NaN	NaN	NaN	-0.27	NaN	NaN	NaN	NaN	NaN	NaN	NaN
Q8BSY0	Asph	Aspartyl/asparaginyl beta-hydroxylase OS=Mus musculus OX=10090 GN=Asph PE=1 SV=1	1.97e+18	0	97.401	31	18	139	0	17	1	529.09	139	18	1	>sp|Q8BSY0|ASPH_MOUSE Aspartyl/asparaginyl beta-hydroxylase OS=Mus musculus OX=10090 GN=Asph PE=1 SV=1	0.14	0.01	-0.14	-0.06	-0.42	-0.23	-0.35	-0.02	-0.13	-0.25	-0.12	0.04	-0.18	-0.12	-0.01	-0.3	-0.04	-0.03	-0.3	0.45	0.3	0.27	0.31	-0.21	-0.04	-0.4	-0.22	-0.26	-0.27	-0.11	-0.24	-0.05	-0.06
Q61035	Hars	Histidine--tRNA ligase, cytoplasmic OS=Mus musculus OX=10090 GN=Hars PE=1 SV=2	3e+18	0	97.209	42	17	233	14	14	1	715.03	233	17	3	>sp|Q61035|SYHC_MOUSE Histidine--tRNA ligase, cytoplasmic OS=Mus musculus OX=10090 GN=Hars PE=1 SV=2	0.06	0.01	0.1	0.17	-0.03	-0.03	0.1	0.1	0.18	0.38	0	-0.12	-0.06	-0.16	-0.18	-0.06	0.05	0.02	0.17	0.02	0.06	-0.15	-0.08	0.24	0.03	0.09	-0.07	-0.06	-0.01	-0.15	0	-0.09	-0.01
Q8R050	Gspt1	Eukaryotic peptide chain release factor GTP-binding subunit ERF3A OS=Mus musculus OX=10090 GN=Gspt1 PE=1 SV=2	-2.35e+18	0	97.2	33	19	174	0	19	1	519.39	174	19	0	>sp|Q8R050|ERF3A_MOUSE Eukaryotic peptide chain release factor GTP-binding subunit ERF3A OS=Mus musculus OX=10090 GN=Gspt1 PE=1 SV=2	0.09	-0.14	0.07	-0.04	-0.09	0.18	0.03	0.01	-0.06	-0.01	0.01	-0.06	0.12	-0.08	-0.11	0.01	0.08	0.03	-0.06	0.05	-0.03	-0.1	-0.17	0.06	-0.05	-0.03	-0.29	-0.06	-0.07	-0.01	-0.02	-0.04	0.01
O08911	Mapk12	Mitogen-activated protein kinase 12 OS=Mus musculus OX=10090 GN=Mapk12 PE=1 SV=1	-5.46e+18	0	97.095	58	18	322	16	17	1	1060.81	322	18	0	>sp|O08911|MK12_MOUSE Mitogen-activated protein kinase 12 OS=Mus musculus OX=10090 GN=Mapk12 PE=1 SV=1	0.1	0.11	0.16	-0.07	0.02	-0.25	0.09	0.2	0.08	0.16	0.16	-0.11	0.03	-0.03	-0.22	-0.02	-0.09	-0.19	-0.03	-0.12	0.39	-0.06	0.06	0.16	0.17	-0.01	-0.14	0.37	0.08	-0.18	0.04	-0.04	0.13
Q62446	Fkbp3	Peptidyl-prolyl cis-trans isomerase FKBP3 OS=Mus musculus OX=10090 GN=Fkbp3 PE=1 SV=2	-7.41e+18	0	97.068	47	9	219	1	9	1	781.55	219	9	0	>sp|Q62446|FKBP3_MOUSE Peptidyl-prolyl cis-trans isomerase FKBP3 OS=Mus musculus OX=10090 GN=Fkbp3 PE=1 SV=2	0.03	0.04	0.01	-0.01	0.1	-0.09	-0.13	0.17	-0.24	-0.06	0.07	-0.07	-0.06	-0.02	0.04	0.07	-0.03	0.17	0.07	-0.28	-0.07	0.14	0.09	-0.13	0.11	-0.06	-0.15	0.05	0.12	0.03	0.13	0.04	0.13
Q9ET54-6	Palld	Isoform of Q9ET54, Isoform 6 of Palladin OS=Mus musculus OX=10090 GN=Palld	-4.62e+18	0	96.641	23	23	199	0	1	1	645.33	199	23	0	>sp|Q9ET54-6|PALLD_MOUSE Isoform of Q9ET54, Isoform 6 of Palladin OS=Mus musculus OX=10090 GN=Palld	NaN	0.34	NaN	NaN	0.04	NaN	NaN	NaN	NaN	NaN	NaN	NaN	0.12	NaN	NaN	0.26	-0.2	NaN	NaN	NaN	NaN	NaN	NaN	NaN	NaN	0.29	NaN	NaN	NaN	NaN	NaN	NaN	NaN
[truncated: 4,425 more rows]
[truncated: 128 more columns]
