# Supplementary material for: Proteome-wide systems genetics identifies UFMylation as a regulator of skeletal muscle function
Source: eLife. 2022 Dec 6;11:e82951. doi: 10.7554/eLife.82951 (PMC9833826; doi:10.7554/eLife.82951)
Supplement: Supplementary file 2. — Protein quantitative trait loci from 161 HMDP cohort mice. Table contains cis-pQTLs (p < 1×10−4) and trans-pQTLs (p < 5 × 10−8), including genomic locations of the single nucleotide polymorphism (SNP) and associated gene. pQTLs are annotated with proxy (cis/trans), intragenic variants, known LD blocks, variant effect, variant impact, and target screen prioritization columns. Related to Figures 1—3, and Figure 1—figure supplement 2. [file elife-82951-supp2.xlsx]

## Sheet: table_qtl_processed
ID	snp_bp_abs	snp_chr	gene_symbol	gene_start_abs	gene_end_abs	gene_chr	pvalue	proxy	CP_Intragenic_QTL	LD_name	CP_Variant_Effect	CP_Variant_Impact	target in screen
rs6335769	2091609724	15	Mpst	2091778860	2091786457	15	6.22e-60	cis	FALSE	LD_Chr_15_2091454134_2091782818	intergenic_variant	MODIFIER	NA
rs31907609	2091337747	15	Mpst	2091778860	2091786457	15	6.22e-60	cis	FALSE	LD_Chr_15_2089818246_2091438074	upstream_gene_variant	MODIFIER	NA
rs31522752	2091608378	15	Mpst	2091778860	2091786457	15	6.22e-60	cis	FALSE	LD_Chr_15_2091454134_2091782818	intergenic_variant	MODIFIER	NA
rs31520864	2091618141	15	Mpst	2091778860	2091786457	15	6.22e-60	cis	FALSE	LD_Chr_15_2091454134_2091782818	intron_variant	MODIFIER	NA
rs3725477	2091454134	15	Mpst	2091778860	2091786457	15	1.62e-58	cis	FALSE	NA	intron_variant	MODIFIER	NA
rs31555594	2091977136	15	Mpst	2091778860	2091786457	15	7.49e-57	cis	FALSE	LD_Chr_15_2091929013_2092170544	synonymous_variant	LOW	NA
rs31548561	2091888780	15	Mpst	2091778860	2091786457	15	2.33e-56	cis	FALSE	LD_Chr_15_2091888684_2091892780	intergenic_variant	MODIFIER	NA
rs31516486	2091438074	15	Mpst	2091778860	2091786457	15	2.33e-56	cis	FALSE	NA	intron_variant	MODIFIER	NA
rs48958214	94036417	1	D2hgdh	93824909	93852348	1	1.04e-55	cis	FALSE	LD_Chr_1_93692658_94038305	downstream_gene_variant	MODIFIER	NA
rs31521941	2091607114	15	Mpst	2091778860	2091786457	15	8.51e-55	cis	FALSE	LD_Chr_15_2091454134_2091782818	intergenic_variant	MODIFIER	NA
rs31555099	2091929013	15	Mpst	2091778860	2091786457	15	5.4e-53	cis	FALSE	NA	upstream_gene_variant	MODIFIER	NA
rs31514180	2091441813	15	Mpst	2091778860	2091786457	15	5.4e-53	cis	FALSE	NA	intron_variant	MODIFIER	NA
rs31553636	2091914065	15	Mpst	2091778860	2091786457	15	6.2e-51	cis	FALSE	NA	intron_variant	MODIFIER	NA
rs31749051	2091936358	15	Mpst	2091778860	2091786457	15	6.2e-51	cis	FALSE	LD_Chr_15_2091929013_2092170544	downstream_gene_variant	MODIFIER	NA
rs31523240	2091634555	15	Mpst	2091778860	2091786457	15	2.85e-48	cis	FALSE	LD_Chr_15_2091454134_2091782818	intron_variant	MODIFIER	NA
rs31781085	2091782818	15	Mpst	2091778860	2091786457	15	1.16e-46	cis	TRUE	NA	upstream_gene_variant	MODIFIER	NA
rs3678676	94030724	1	D2hgdh	93824909	93852348	1	6.51e-45	cis	FALSE	LD_Chr_1_93692658_94038305	downstream_gene_variant	MODIFIER	NA
rs32492778	94032215	1	D2hgdh	93824909	93852348	1	1.03e-44	cis	FALSE	LD_Chr_1_93692658_94038305	downstream_gene_variant	MODIFIER	NA
rs32493779	93798133	1	D2hgdh	93824909	93852348	1	1.03e-44	cis	FALSE	LD_Chr_1_93692658_94038305	downstream_gene_variant	MODIFIER	NA
rs30354304	93692658	1	D2hgdh	93824909	93852348	1	1.03e-44	cis	FALSE	NA	intron_variant	MODIFIER	NA
rs30358636	93704409	1	D2hgdh	93824909	93852348	1	1.03e-44	cis	FALSE	LD_Chr_1_93692658_94038305	downstream_gene_variant	MODIFIER	NA
rs3717242	93742419	1	D2hgdh	93824909	93852348	1	1.03e-44	cis	FALSE	LD_Chr_1_93692658_94038305	non_coding_transcript_variant	MODIFIER	NA
rs32530051	93728061	1	D2hgdh	93824909	93852348	1	1.03e-44	cis	FALSE	LD_Chr_1_93692658_94038305	upstream_gene_variant	MODIFIER	NA
rs32773370	94021225	1	D2hgdh	93824909	93852348	1	1.03e-44	cis	FALSE	LD_Chr_1_93692658_94038305	downstream_gene_variant	MODIFIER	NA
rs31552024	2091912369	15	Mpst	2091778860	2091786457	15	8.1e-43	cis	FALSE	NA	downstream_gene_variant	MODIFIER	NA
rs31552310	2091959516	15	Mpst	2091778860	2091786457	15	8.1e-43	cis	FALSE	LD_Chr_15_2091929013_2092170544	intergenic_variant	MODIFIER	NA
rs31552342	2092012828	15	Mpst	2091778860	2091786457	15	8.1e-43	cis	FALSE	LD_Chr_15_2091929013_2092170544	intergenic_variant	MODIFIER	NA
rs32053746	94189282	1	D2hgdh	93824909	93852348	1	1.32e-42	cis	FALSE	NA	intergenic_variant	MODIFIER	NA
rs32579811	94192429	1	D2hgdh	93824909	93852348	1	1.32e-42	cis	FALSE	NA	intergenic_variant	MODIFIER	NA
rs51102274	94036584	1	D2hgdh	93824909	93852348	1	1.32e-42	cis	FALSE	LD_Chr_1_93692658_94038305	downstream_gene_variant	MODIFIER	NA
rs31844115	94037338	1	D2hgdh	93824909	93852348	1	1.32e-42	cis	FALSE	LD_Chr_1_93692658_94038305	downstream_gene_variant	MODIFIER	NA
rs31552420	2091974450	15	Mpst	2091778860	2091786457	15	2.42e-42	cis	FALSE	LD_Chr_15_2091929013_2092170544	NMD_transcript_variant	MODIFIER	NA
rs31602328	2092686988	15	Mpst	2091778860	2091786457	15	3.77e-42	cis	FALSE	LD_Chr_15_2092608062_2092710604	intron_variant	MODIFIER	NA
rs3679649	2092796270	15	Mpst	2091778860	2091786457	15	3.77e-42	cis	FALSE	NA	downstream_gene_variant	MODIFIER	NA
rs31555103	2091929284	15	Mpst	2091778860	2091786457	15	2.41e-41	cis	FALSE	LD_Chr_15_2091929013_2092170544	upstream_gene_variant	MODIFIER	NA
rs32349674	94136872	1	D2hgdh	93824909	93852348	1	2.46e-41	cis	FALSE	LD_Chr_1_94050422_94169057	intergenic_variant	MODIFIER	NA
rs31564590	2092104038	15	Mpst	2091778860	2091786457	15	3.5e-41	cis	FALSE	LD_Chr_15_2091929013_2092170544	intergenic_variant	MODIFIER	NA
rs31561250	2092114934	15	Mpst	2091778860	2091786457	15	3.5e-41	cis	FALSE	LD_Chr_15_2091929013_2092170544	intergenic_variant	MODIFIER	NA
rs4230847	2092147303	15	Mpst	2091778860	2091786457	15	3.5e-41	cis	FALSE	LD_Chr_15_2091929013_2092170544	upstream_gene_variant	MODIFIER	NA
rs31565548	2092158497	15	Mpst	2091778860	2091786457	15	3.5e-41	cis	FALSE	LD_Chr_15_2091929013_2092170544	intron_variant	MODIFIER	NA
rs31560460	2092113803	15	Mpst	2091778860	2091786457	15	3.5e-41	cis	FALSE	LD_Chr_15_2091929013_2092170544	intergenic_variant	MODIFIER	NA
rs31561244	2092114169	15	Mpst	2091778860	2091786457	15	3.5e-41	cis	FALSE	LD_Chr_15_2091929013_2092170544	intergenic_variant	MODIFIER	NA
rs3657463	2092116519	15	Mpst	2091778860	2091786457	15	3.5e-41	cis	FALSE	LD_Chr_15_2091929013_2092170544	intergenic_variant	MODIFIER	NA
rs31560587	2092118135	15	Mpst	2091778860	2091786457	15	3.5e-41	cis	FALSE	LD_Chr_15_2091929013_2092170544	intergenic_variant	MODIFIER	NA
rs33562067	2299128383	17	Cox7a2l	2299125815	2299141227	17	3.5e-41	cis	TRUE	LD_Chr_17_2298908041_2299278376	non_coding_transcript_exon_variant	MODIFIER	NA
rs49938228	2299163762	17	Cox7a2l	2299125815	2299141227	17	3.5e-41	cis	FALSE	LD_Chr_17_2298908041_2299278376	intergenic_variant	MODIFIER	NA
rs45713501	2298953652	17	Cox7a2l	2299125815	2299141227	17	3.5e-41	cis	FALSE	LD_Chr_17_2298908041_2299278376	intergenic_variant	MODIFIER	NA
rs33589983	2299121078	17	Cox7a2l	2299125815	2299141227	17	3.5e-41	cis	FALSE	LD_Chr_17_2298908041_2299278376	downstream_gene_variant	MODIFIER	NA
rs46168641	2299149643	17	Cox7a2l	2299125815	2299141227	17	3.5e-41	cis	FALSE	LD_Chr_17_2298908041_2299278376	intergenic_variant	MODIFIER	NA
rs31549174	2091909445	15	Mpst	2091778860	2091786457	15	4.11e-41	cis	FALSE	NA	downstream_gene_variant	MODIFIER	NA
rs31551416	2091911697	15	Mpst	2091778860	2091786457	15	4.11e-41	cis	FALSE	NA	3_prime_UTR_variant	MODIFIER	NA
rs31550796	2091892780	15	Mpst	2091778860	2091786457	15	4.11e-41	cis	FALSE	NA	downstream_gene_variant	MODIFIER	NA
rs50906588	2299154897	17	Cox7a2l	2299125815	2299141227	17	4.42e-41	cis	FALSE	LD_Chr_17_2298908041_2299278376	intergenic_variant	MODIFIER	NA
rs30746733	93806446	1	D2hgdh	93824909	93852348	1	1.08e-40	cis	FALSE	LD_Chr_1_93692658_94038305	downstream_gene_variant	MODIFIER	NA
rs32401637	94026102	1	D2hgdh	93824909	93852348	1	1.18e-40	cis	FALSE	LD_Chr_1_93692658_94038305	downstream_gene_variant	MODIFIER	NA
rs31556708	2092015304	15	Mpst	2091778860	2091786457	15	2.29e-40	cis	FALSE	LD_Chr_15_2091929013_2092170544	intergenic_variant	MODIFIER	NA
rs31775382	2093805195	15	Mpst	2091778860	2091786457	15	2.65e-40	cis	FALSE	LD_Chr_15_2093520056_2094599319	non_coding_transcript_variant	MODIFIER	NA
rs31524457	2091525502	15	Mpst	2091778860	2091786457	15	3.07e-40	cis	FALSE	LD_Chr_15_2091454134_2091782818	intergenic_variant	MODIFIER	NA
rs31558307	2092064613	15	Mpst	2091778860	2091786457	15	1.19e-39	cis	FALSE	LD_Chr_15_2091929013_2092170544	non_coding_transcript_variant	MODIFIER	NA
rs31551418	2091912054	15	Mpst	2091778860	2091786457	15	2.3e-39	cis	FALSE	NA	downstream_gene_variant	MODIFIER	NA
rs31548559	2091888684	15	Mpst	2091778860	2091786457	15	3.86e-39	cis	FALSE	NA	intergenic_variant	MODIFIER	NA
rs27567974	676976253	4	Aldh4a1	677247741	677274565	4	4.29e-39	cis	FALSE	LD_Chr_4_676629220_677256778	upstream_gene_variant	MODIFIER	NA
rs27567965	676979557	4	Aldh4a1	677247741	677274565	4	4.29e-39	cis	FALSE	LD_Chr_4_676629220_677256778	intron_variant	MODIFIER	NA
rs27567958	676982065	4	Aldh4a1	677247741	677274565	4	4.29e-39	cis	FALSE	LD_Chr_4_676629220_677256778	upstream_gene_variant	MODIFIER	NA
rs27567866	677023617	4	Aldh4a1	677247741	677274565	4	4.29e-39	cis	FALSE	LD_Chr_4_676629220_677256778	intron_variant	MODIFIER	NA
rs27567861	677025613	4	Aldh4a1	677247741	677274565	4	4.29e-39	cis	FALSE	LD_Chr_4_676629220_677256778	intron_variant	MODIFIER	NA
rs27567854	677028767	4	Aldh4a1	677247741	677274565	4	4.29e-39	cis	FALSE	LD_Chr_4_676629220_677256778	intron_variant	MODIFIER	NA
rs32565515	677045102	4	Aldh4a1	677247741	677274565	4	4.29e-39	cis	FALSE	LD_Chr_4_676629220_677256778	downstream_gene_variant	MODIFIER	NA
rs27552741	677092723	4	Aldh4a1	677247741	677274565	4	4.29e-39	cis	FALSE	LD_Chr_4_676629220_677256778	intron_variant	MODIFIER	NA
rs32358776	677101295	4	Aldh4a1	677247741	677274565	4	4.29e-39	cis	FALSE	LD_Chr_4_676629220_677256778	upstream_gene_variant	MODIFIER	NA
rs27552603	677131231	4	Aldh4a1	677247741	677274565	4	4.29e-39	cis	FALSE	LD_Chr_4_676629220_677256778	intergenic_variant	MODIFIER	NA
rs27552602	677131248	4	Aldh4a1	677247741	677274565	4	4.29e-39	cis	FALSE	LD_Chr_4_676629220_677256778	intergenic_variant	MODIFIER	NA
rs32881593	677216183	4	Aldh4a1	677247741	677274565	4	4.29e-39	cis	FALSE	LD_Chr_4_676629220_677256778	upstream_gene_variant	MODIFIER	NA
rs32930547	677291917	4	Aldh4a1	677247741	677274565	4	4.29e-39	cis	FALSE	LD_Chr_4_677278350_677308950	intron_variant	MODIFIER	NA
rs3661982	677338353	4	Aldh4a1	677247741	677274565	4	4.29e-39	cis	FALSE	LD_Chr_4_677313154_677590848	intergenic_variant	MODIFIER	NA
rs3662475	677338403	4	Aldh4a1	677247741	677274565	4	4.29e-39	cis	FALSE	LD_Chr_4_677313154_677590848	intergenic_variant	MODIFIER	NA
rs27642542	677370251	4	Aldh4a1	677247741	677274565	4	4.29e-39	cis	FALSE	LD_Chr_4_677313154_677590848	intron_variant	MODIFIER	NA
rs27642482	677380988	4	Aldh4a1	677247741	677274565	4	4.29e-39	cis	FALSE	LD_Chr_4_677313154_677590848	intron_variant	MODIFIER	NA
rs27626162	677419814	4	Aldh4a1	677247741	677274565	4	4.29e-39	cis	FALSE	LD_Chr_4_677313154_677590848	intron_variant	MODIFIER	NA
rs32632502	677492308	4	Aldh4a1	677247741	677274565	4	4.29e-39	cis	FALSE	LD_Chr_4_677313154_677590848	intergenic_variant	MODIFIER	NA
rs27612106	677515722	4	Aldh4a1	677247741	677274565	4	4.29e-39	cis	FALSE	LD_Chr_4_677313154_677590848	intergenic_variant	MODIFIER	NA
rs27592058	677584534	4	Aldh4a1	677247741	677274565	4	4.29e-39	cis	FALSE	LD_Chr_4_677313154_677590848	downstream_gene_variant	MODIFIER	NA
rs27592056	677584956	4	Aldh4a1	677247741	677274565	4	4.29e-39	cis	FALSE	LD_Chr_4_677313154_677590848	downstream_gene_variant	MODIFIER	NA
rs27592011	677590848	4	Aldh4a1	677247741	677274565	4	4.29e-39	cis	FALSE	NA	synonymous_variant	LOW	NA
rs27626034	677491842	4	Aldh4a1	677247741	677274565	4	4.29e-39	cis	FALSE	LD_Chr_4_677313154_677590848	intergenic_variant	MODIFIER	NA
rs32900631	677603244	4	Aldh4a1	677247741	677274565	4	4.29e-39	cis	FALSE	LD_Chr_4_677593683_677641452	intergenic_variant	MODIFIER	NA
rs27591868	677652450	4	Aldh4a1	677247741	677274565	4	4.29e-39	cis	FALSE	NA	intron_variant	MODIFIER	NA
rs4136892	677710014	4	Aldh4a1	677247741	677274565	4	4.29e-39	cis	FALSE	LD_Chr_4_677652450_678206916	intron_variant	MODIFIER	NA
rs27567952	676985445	4	Aldh4a1	677247741	677274565	4	4.29e-39	cis	FALSE	LD_Chr_4_676629220_677256778	synonymous_variant	LOW	NA
rs27567785	677073670	4	Aldh4a1	677247741	677274565	4	4.29e-39	cis	FALSE	LD_Chr_4_676629220_677256778	intron_variant	MODIFIER	NA
rs27567779	677075578	4	Aldh4a1	677247741	677274565	4	4.29e-39	cis	FALSE	LD_Chr_4_676629220_677256778	intron_variant	MODIFIER	NA
rs27552597	677131624	4	Aldh4a1	677247741	677274565	4	4.29e-39	cis	FALSE	LD_Chr_4_676629220_677256778	intergenic_variant	MODIFIER	NA
rs27546664	677174711	4	Aldh4a1	677247741	677274565	4	4.29e-39	cis	FALSE	LD_Chr_4_676629220_677256778	intron_variant	MODIFIER	NA
rs27623443	677187281	4	Aldh4a1	677247741	677274565	4	4.29e-39	cis	FALSE	LD_Chr_4_676629220_677256778	intron_variant	MODIFIER	NA
rs27595233	677308950	4	Aldh4a1	677247741	677274565	4	4.29e-39	cis	FALSE	NA	intergenic_variant	MODIFIER	NA
rs27642553	677366923	4	Aldh4a1	677247741	677274565	4	4.29e-39	cis	FALSE	LD_Chr_4_677313154_677590848	intron_variant	MODIFIER	NA
rs27642495	677377581	4	Aldh4a1	677247741	677274565	4	4.29e-39	cis	FALSE	LD_Chr_4_677313154_677590848	intron_variant	MODIFIER	NA
rs27626057	677475417	4	Aldh4a1	677247741	677274565	4	4.29e-39	cis	FALSE	LD_Chr_4_677313154_677590848	intergenic_variant	MODIFIER	NA
rs27626043	677480029	4	Aldh4a1	677247741	677274565	4	4.29e-39	cis	FALSE	LD_Chr_4_677313154_677590848	intergenic_variant	MODIFIER	NA
rs27612051	677521703	4	Aldh4a1	677247741	677274565	4	4.29e-39	cis	FALSE	LD_Chr_4_677313154_677590848	intergenic_variant	MODIFIER	NA
rs27592059	677584507	4	Aldh4a1	677247741	677274565	4	4.29e-39	cis	FALSE	LD_Chr_4_677313154_677590848	downstream_gene_variant	MODIFIER	NA
rs27592000	677593683	4	Aldh4a1	677247741	677274565	4	4.29e-39	cis	FALSE	NA	upstream_gene_variant	MODIFIER	NA
rs50179078	94038305	1	D2hgdh	93824909	93852348	1	1.52e-38	cis	FALSE	NA	3_prime_UTR_variant	MODIFIER	NA
rs33457715	2299130924	17	Cox7a2l	2299125815	2299141227	17	3.48e-38	cis	TRUE	LD_Chr_17_2298908041_2299278376	upstream_gene_variant	MODIFIER	NA
rs27595204	677313154	4	Aldh4a1	677247741	677274565	4	5.87e-38	cis	FALSE	NA	intergenic_variant	MODIFIER	NA
rs3686283	677181366	4	Aldh4a1	677247741	677274565	4	5.87e-38	cis	FALSE	LD_Chr_4_676629220_677256778	intron_variant	MODIFIER	NA
rs13472251	2092733438	15	Mpst	2091778860	2091786457	15	1.16e-37	cis	FALSE	NA	downstream_gene_variant	MODIFIER	NA
rs31557745	2092015592	15	Mpst	2091778860	2091786457	15	1.34e-37	cis	FALSE	LD_Chr_15_2091929013_2092170544	intergenic_variant	MODIFIER	NA
rs32672819	677051251	4	Aldh4a1	677247741	677274565	4	2.71e-37	cis	FALSE	LD_Chr_4_676629220_677256778	intron_variant	MODIFIER	NA
rs27591776	677677827	4	Aldh4a1	677247741	677274565	4	2.71e-37	cis	FALSE	LD_Chr_4_677652450_678206916	intron_variant	MODIFIER	NA
rs27567810	677063125	4	Aldh4a1	677247741	677274565	4	2.71e-37	cis	FALSE	LD_Chr_4_676629220_677256778	intron_variant	MODIFIER	NA
rs33199494	2299019389	17	Cox7a2l	2299125815	2299141227	17	6.16e-37	cis	FALSE	LD_Chr_17_2298908041_2299278376	intron_variant	MODIFIER	NA
rs38310217	2445838899	19	Sec31b	2445830764	2445859671	19	1.05e-36	cis	TRUE	LD_Chr_19_2445693208_2446246532	upstream_gene_variant	MODIFIER	NA
rs36942767	2445838962	19	Sec31b	2445830764	2445859671	19	1.05e-36	cis	TRUE	LD_Chr_19_2445693208_2446246532	synonymous_variant	LOW	NA
rs38403233	2445841535	19	Sec31b	2445830764	2445859671	19	1.05e-36	cis	TRUE	LD_Chr_19_2445693208_2446246532	intron_variant	MODIFIER	NA
rs27591990	677596859	4	Aldh4a1	677247741	677274565	4	1.36e-36	cis	FALSE	LD_Chr_4_677593683_677641452	upstream_gene_variant	MODIFIER	NA
rs31560017	2092066934	15	Mpst	2091778860	2091786457	15	3.2e-36	cis	FALSE	LD_Chr_15_2091929013_2092170544	intron_variant	MODIFIER	NA
rs27584224	676891250	4	Aldh4a1	677247741	677274565	4	4.95e-36	cis	FALSE	LD_Chr_4_676629220_677256778	intron_variant	MODIFIER	NA
rs27623491	677208335	4	Aldh4a1	677247741	677274565	4	4.95e-36	cis	FALSE	LD_Chr_4_676629220_677256778	intron_variant	MODIFIER	NA
rs27595116	677335759	4	Aldh4a1	677247741	677274565	4	8.82e-36	cis	FALSE	LD_Chr_4_677313154_677590848	intergenic_variant	MODIFIER	NA
rs31557009	171146297	1	Mpz	171150711	171161130	1	2.29e-35	cis	FALSE	LD_Chr_1_171057436_171191690	intron_variant	MODIFIER	+
rs32561718	677467426	4	Aldh4a1	677247741	677274565	4	2.9e-35	cis	FALSE	LD_Chr_4_677313154_677590848	intergenic_variant	MODIFIER	NA
rs27626737	677714285	4	Aldh4a1	677247741	677274565	4	2.9e-35	cis	FALSE	LD_Chr_4_677652450_678206916	intron_variant	MODIFIER	NA
rs31477870	171146237	1	Mpz	171150711	171161130	1	4.45e-35	cis	FALSE	LD_Chr_1_171057436_171191690	intron_variant	MODIFIER	+
rs27546670	677173567	4	Aldh4a1	677247741	677274565	4	5.16e-35	cis	FALSE	LD_Chr_4_676629220_677256778	intron_variant	MODIFIER	NA
rs3704633	2093397882	15	Mpst	2091778860	2091786457	15	8.72e-35	cis	FALSE	NA	non_coding_transcript_variant	MODIFIER	NA
rs32169794	2093834109	15	Mpst	2091778860	2091786457	15	8.72e-35	cis	FALSE	LD_Chr_15_2093520056_2094599319	upstream_gene_variant	MODIFIER	NA
rs31635042	2093846094	15	Mpst	2091778860	2091786457	15	8.72e-35	cis	FALSE	LD_Chr_15_2093520056_2094599319	intron_variant	MODIFIER	NA
rs31615509	2093854655	15	Mpst	2091778860	2091786457	15	8.72e-35	cis	FALSE	LD_Chr_15_2093520056_2094599319	downstream_gene_variant	MODIFIER	NA
rs32439968	2093976566	15	Mpst	2091778860	2091786457	15	8.72e-35	cis	FALSE	LD_Chr_15_2093520056_2094599319	intron_variant	MODIFIER	NA
rs36772672	2093086230	15	Mpst	2091778860	2091786457	15	8.72e-35	cis	FALSE	LD_Chr_15_2093037267_2093095561	upstream_gene_variant	MODIFIER	NA
rs37503782	2093289577	15	Mpst	2091778860	2091786457	15	8.72e-35	cis	FALSE	LD_Chr_15_2093113077_2093335325	downstream_gene_variant	MODIFIER	NA
rs36372042	2093370191	15	Mpst	2091778860	2091786457	15	8.72e-35	cis	FALSE	LD_Chr_15_2093342394_2093372945	downstream_gene_variant	MODIFIER	NA
rs37459996	2093371482	15	Mpst	2091778860	2091786457	15	8.72e-35	cis	FALSE	LD_Chr_15_2093342394_2093372945	downstream_gene_variant	MODIFIER	NA
rs31614668	2093853530	15	Mpst	2091778860	2091786457	15	8.72e-35	cis	FALSE	LD_Chr_15_2093520056_2094599319	intron_variant	MODIFIER	NA
rs31613072	2093855033	15	Mpst	2091778860	2091786457	15	8.72e-35	cis	FALSE	LD_Chr_15_2093520056_2094599319	intron_variant	MODIFIER	NA
rs32162683	2093069458	15	Mpst	2091778860	2091786457	15	8.72e-35	cis	FALSE	LD_Chr_15_2093037267_2093095561	intron_variant	MODIFIER	NA
rs32187972	2093182359	15	Mpst	2091778860	2091786457	15	8.72e-35	cis	FALSE	LD_Chr_15_2093113077_2093335325	intron_variant	MODIFIER	NA
rs31836684	677216111	4	Aldh4a1	677247741	677274565	4	1.53e-34	cis	FALSE	LD_Chr_4_676629220_677256778	intron_variant	MODIFIER	NA
rs38144936	2445898456	19	Sec31b	2445830764	2445859671	19	1.91e-34	cis	FALSE	LD_Chr_19_2445693208_2446246532	intergenic_variant	MODIFIER	NA
rs31940893	2093372945	15	Mpst	2091778860	2091786457	15	2.23e-34	cis	FALSE	NA	downstream_gene_variant	MODIFIER	NA
rs36817227	2093342394	15	Mpst	2091778860	2091786457	15	2.23e-34	cis	FALSE	NA	intron_variant	MODIFIER	NA
rs3720346	2298876698	17	Cox7a2l	2299125815	2299141227	17	2.68e-34	cis	FALSE	LD_Chr_17_2298695064_2298901663	intergenic_variant	MODIFIER	NA
rs31571793	2092267625	15	Mpst	2091778860	2091786457	15	4.06e-34	cis	FALSE	LD_Chr_15_2092244304_2092334123	downstream_gene_variant	MODIFIER	NA
rs31575234	2092330366	15	Mpst	2091778860	2091786457	15	4.06e-34	cis	FALSE	LD_Chr_15_2092244304_2092334123	intron_variant	MODIFIER	NA
rs31569893	2092334123	15	Mpst	2091778860	2091786457	15	4.06e-34	cis	FALSE	NA	downstream_gene_variant	MODIFIER	NA
rs31501628	2091285002	15	Mpst	2091778860	2091786457	15	5.23e-34	cis	FALSE	LD_Chr_15_2089818246_2091438074	downstream_gene_variant	MODIFIER	NA
rs30400748	2445857391	19	Sec31b	2445830764	2445859671	19	8.69e-34	cis	TRUE	LD_Chr_19_2445693208_2446246532	intron_variant	MODIFIER	NA
rs31540821	2093855838	15	Mpst	2091778860	2091786457	15	1.16e-33	cis	FALSE	LD_Chr_15_2093520056_2094599319	intron_variant	MODIFIER	NA
rs27643099	677689805	4	Aldh4a1	677247741	677274565	4	1.26e-33	cis	FALSE	LD_Chr_4_677652450_678206916	intron_variant	MODIFIER	NA
rs31768787	2093610802	15	Mpst	2091778860	2091786457	15	1.56e-33	cis	FALSE	LD_Chr_15_2093520056_2094599319	NMD_transcript_variant	MODIFIER	NA
rs31854801	2093622408	15	Mpst	2091778860	2091786457	15	1.56e-33	cis	FALSE	LD_Chr_15_2093520056_2094599319	synonymous_variant	LOW	NA
rs46121561	2093623219	15	Mpst	2091778860	2091786457	15	1.56e-33	cis	FALSE	LD_Chr_15_2093520056_2094599319	intron_variant	MODIFIER	NA
rs46239975	2093623270	15	Mpst	2091778860	2091786457	15	1.56e-33	cis	FALSE	LD_Chr_15_2093520056_2094599319	downstream_gene_variant	MODIFIER	NA
rs50765512	2093625154	15	Mpst	2091778860	2091786457	15	1.56e-33	cis	FALSE	LD_Chr_15_2093520056_2094599319	upstream_gene_variant	MODIFIER	NA
rs31676349	2093625302	15	Mpst	2091778860	2091786457	15	1.56e-33	cis	FALSE	LD_Chr_15_2093520056_2094599319	upstream_gene_variant	MODIFIER	NA
rs31598945	2093651895	15	Mpst	2091778860	2091786457	15	1.56e-33	cis	FALSE	LD_Chr_15_2093520056_2094599319	intergenic_variant	MODIFIER	NA
rs31608942	2093761168	15	Mpst	2091778860	2091786457	15	1.56e-33	cis	FALSE	LD_Chr_15_2093520056_2094599319	NMD_transcript_variant	MODIFIER	NA
rs31607679	2093698575	15	Mpst	2091778860	2091786457	15	1.56e-33	cis	FALSE	LD_Chr_15_2093520056_2094599319	NMD_transcript_variant	MODIFIER	NA
rs31608936	2093760972	15	Mpst	2091778860	2091786457	15	1.56e-33	cis	FALSE	LD_Chr_15_2093520056_2094599319	upstream_gene_variant	MODIFIER	NA
rs31991786	2093623920	15	Mpst	2091778860	2091786457	15	1.56e-33	cis	FALSE	LD_Chr_15_2093520056_2094599319	3_prime_UTR_variant	MODIFIER	NA
rs32155776	2093624067	15	Mpst	2091778860	2091786457	15	1.56e-33	cis	FALSE	LD_Chr_15_2093520056_2094599319	3_prime_UTR_variant	MODIFIER	NA
rs32026464	2093805301	15	Mpst	2091778860	2091786457	15	1.59e-33	cis	FALSE	LD_Chr_15_2093520056_2094599319	non_coding_transcript_variant	MODIFIER	NA
rs3666116	2092765832	15	Mpst	2091778860	2091786457	15	2.17e-33	cis	FALSE	LD_Chr_15_2092749618_2092796270	non_coding_transcript_variant	MODIFIER	NA
rs36717321	2093037267	15	Mpst	2091778860	2091786457	15	2.17e-33	cis	FALSE	NA	non_coding_transcript_variant	MODIFIER	NA
rs31596977	2092688961	15	Mpst	2091778860	2091786457	15	2.17e-33	cis	FALSE	LD_Chr_15_2092608062_2092710604	downstream_gene_variant	MODIFIER	NA
rs31603815	2092755073	15	Mpst	2091778860	2091786457	15	2.17e-33	cis	FALSE	LD_Chr_15_2092749618_2092796270	intron_variant	MODIFIER	NA
rs31603818	2092755578	15	Mpst	2091778860	2091786457	15	2.17e-33	cis	FALSE	LD_Chr_15_2092749618_2092796270	non_coding_transcript_variant	MODIFIER	NA
rs31598859	2092759189	15	Mpst	2091778860	2091786457	15	2.17e-33	cis	FALSE	LD_Chr_15_2092749618_2092796270	intron_variant	MODIFIER	NA
rs50318741	2240454742	17	Fahd1	2240472789	2240474261	17	6.26e-33	cis	FALSE	LD_Chr_17_2240361950_2241076094	intron_variant	MODIFIER	NA
rs31608940	2093761135	15	Mpst	2091778860	2091786457	15	8.25e-33	cis	FALSE	LD_Chr_15_2093520056_2094599319	intron_variant	MODIFIER	NA
rs33750900	161193688	1	Prdx6	161240112	161251219	1	1.2e-32	cis	FALSE	LD_Chr_1_161181524_161226379	non_coding_transcript_variant	MODIFIER	NA
rs27575260	676330730	4	Aldh4a1	677247741	677274565	4	1.27e-32	cis	FALSE	LD_Chr_4_676163577_676576704	downstream_gene_variant	MODIFIER	NA
rs37732575	2445847760	19	Sec31b	2445830764	2445859671	19	1.35e-32	cis	TRUE	LD_Chr_19_2445693208_2446246532	intron_variant	MODIFIER	NA
rs31593628	94192520	1	D2hgdh	93824909	93852348	1	2.31e-32	cis	FALSE	NA	intergenic_variant	MODIFIER	NA
rs31246795	93552893	1	D2hgdh	93824909	93852348	1	2.34e-32	cis	FALSE	NA	intron_variant	MODIFIER	NA
rs31585657	2092464897	15	Mpst	2091778860	2091786457	15	2.84e-32	cis	FALSE	LD_Chr_15_2092448518_2092605373	downstream_gene_variant	MODIFIER	NA
rs31828258	2092897764	15	Mpst	2091778860	2091786457	15	2.84e-32	cis	FALSE	LD_Chr_15_2092815637_2093006736	downstream_gene_variant	MODIFIER	NA
rs31579193	2092448518	15	Mpst	2091778860	2091786457	15	2.84e-32	cis	FALSE	NA	intron_variant	MODIFIER	NA
rs31580429	2092449378	15	Mpst	2091778860	2091786457	15	2.84e-32	cis	FALSE	LD_Chr_15_2092448518_2092605373	synonymous_variant	LOW	NA
rs31581194	2092453645	15	Mpst	2091778860	2091786457	15	2.84e-32	cis	FALSE	LD_Chr_15_2092448518_2092605373	downstream_gene_variant	MODIFIER	NA
rs31582768	2092454282	15	Mpst	2091778860	2091786457	15	2.84e-32	cis	FALSE	LD_Chr_15_2092448518_2092605373	upstream_gene_variant	MODIFIER	NA
rs31584627	2092457085	15	Mpst	2091778860	2091786457	15	2.84e-32	cis	FALSE	LD_Chr_15_2092448518_2092605373	non_coding_transcript_variant	MODIFIER	NA
rs31585616	2092544081	15	Mpst	2091778860	2091786457	15	2.84e-32	cis	FALSE	LD_Chr_15_2092448518_2092605373	upstream_gene_variant	MODIFIER	NA
rs33749323	161244832	1	Prdx6	161240112	161251219	1	2.95e-32	cis	TRUE	NA	downstream_gene_variant	MODIFIER	NA
rs32655453	161283462	1	Prdx6	161240112	161251219	1	2.95e-32	cis	FALSE	LD_Chr_1_161244832_161467303	intergenic_variant	MODIFIER	NA
rs33746242	161284191	1	Prdx6	161240112	161251219	1	2.95e-32	cis	FALSE	LD_Chr_1_161244832_161467303	intergenic_variant	MODIFIER	NA
rs32354858	161366660	1	Prdx6	161240112	161251219	1	2.95e-32	cis	FALSE	LD_Chr_1_161244832_161467303	intergenic_variant	MODIFIER	NA
rs33751163	161058912	1	Prdx6	161240112	161251219	1	2.95e-32	cis	FALSE	LD_Chr_1_161055329_161059193	non_coding_transcript_variant	MODIFIER	NA
rs33751157	161059193	1	Prdx6	161240112	161251219	1	2.95e-32	cis	FALSE	NA	non_coding_transcript_variant	MODIFIER	NA
rs30912995	161072812	1	Prdx6	161240112	161251219	1	2.95e-32	cis	FALSE	LD_Chr_1_161059228_161173694	upstream_gene_variant	MODIFIER	NA
rs33748666	161212137	1	Prdx6	161240112	161251219	1	2.95e-32	cis	FALSE	LD_Chr_1_161181524_161226379	non_coding_transcript_exon_variant	MODIFIER	NA
rs33749314	161245853	1	Prdx6	161240112	161251219	1	2.95e-32	cis	TRUE	LD_Chr_1_161244832_161467303	intron_variant	MODIFIER	NA
rs33746249	161274908	1	Prdx6	161240112	161251219	1	2.95e-32	cis	FALSE	LD_Chr_1_161244832_161467303	intergenic_variant	MODIFIER	NA
rs31564411	2092170544	15	Mpst	2091778860	2091786457	15	3.14e-32	cis	FALSE	NA	intron_variant	MODIFIER	NA
rs31564423	2092230689	15	Mpst	2091778860	2091786457	15	3.14e-32	cis	FALSE	LD_Chr_15_2092229239_2092233976	upstream_gene_variant	MODIFIER	NA
rs32830049	677674022	4	Aldh4a1	677247741	677274565	4	4.41e-32	cis	FALSE	LD_Chr_4_677652450_678206916	intron_variant	MODIFIER	NA
rs31831357	2092815637	15	Mpst	2091778860	2091786457	15	5.18e-32	cis	FALSE	NA	upstream_gene_variant	MODIFIER	NA
rs31587871	2092599690	15	Mpst	2091778860	2091786457	15	5.47e-32	cis	FALSE	LD_Chr_15_2092448518_2092605373	upstream_gene_variant	MODIFIER	NA
rs31577889	2092899161	15	Mpst	2091778860	2091786457	15	5.47e-32	cis	FALSE	LD_Chr_15_2092815637_2093006736	downstream_gene_variant	MODIFIER	NA
rs46991425	2240494535	17	Fahd1	2240472789	2240474261	17	6.35e-32	cis	FALSE	LD_Chr_17_2240361950_2241076094	non_coding_transcript_variant	MODIFIER	NA
rs27552706	677110681	4	Aldh4a1	677247741	677274565	4	6.75e-32	cis	FALSE	LD_Chr_4_676629220_677256778	intron_variant	MODIFIER	NA
rs27552644	677123678	4	Aldh4a1	677247741	677274565	4	6.75e-32	cis	FALSE	LD_Chr_4_676629220_677256778	intergenic_variant	MODIFIER	NA
rs27552727	677094901	4	Aldh4a1	677247741	677274565	4	6.75e-32	cis	FALSE	LD_Chr_4_676629220_677256778	downstream_gene_variant	MODIFIER	NA
rs27623458	677211620	4	Aldh4a1	677247741	677274565	4	6.75e-32	cis	FALSE	LD_Chr_4_676629220_677256778	intron_variant	MODIFIER	NA
rs27623454	677211902	4	Aldh4a1	677247741	677274565	4	6.75e-32	cis	FALSE	LD_Chr_4_676629220_677256778	intron_variant	MODIFIER	NA
rs27623451	677212425	4	Aldh4a1	677247741	677274565	4	6.75e-32	cis	FALSE	LD_Chr_4_676629220_677256778	downstream_gene_variant	MODIFIER	NA
rs27552547	677140123	4	Aldh4a1	677247741	677274565	4	6.75e-32	cis	FALSE	LD_Chr_4_676629220_677256778	intergenic_variant	MODIFIER	NA
rs27562390	677154849	4	Aldh4a1	677247741	677274565	4	6.75e-32	cis	FALSE	LD_Chr_4_676629220_677256778	upstream_gene_variant	MODIFIER	NA
rs33747993	161154127	1	Prdx6	161240112	161251219	1	8.3e-32	cis	FALSE	LD_Chr_1_161059228_161173694	downstream_gene_variant	MODIFIER	NA
rs31771592	2092943117	15	Mpst	2091778860	2091786457	15	9.17e-32	cis	FALSE	LD_Chr_15_2092815637_2093006736	non_coding_transcript_variant	MODIFIER	NA
rs49499568	2298933162	17	Cox7a2l	2299125815	2299141227	17	9.18e-32	cis	FALSE	LD_Chr_17_2298908041_2299278376	intergenic_variant	MODIFIER	NA
rs45978689	2240490125	17	Fahd1	2240472789	2240474261	17	1.13e-31	cis	FALSE	LD_Chr_17_2240361950_2241076094	downstream_gene_variant	MODIFIER	NA
rs49490977	2240463710	17	Fahd1	2240472789	2240474261	17	1.13e-31	cis	FALSE	LD_Chr_17_2240361950_2241076094	downstream_gene_variant	MODIFIER	NA
rs48638472	2240342468	17	Fahd1	2240472789	2240474261	17	1.13e-31	cis	FALSE	LD_Chr_17_2240065603_2240357262	upstream_gene_variant	MODIFIER	NA
rs33316285	2240357262	17	Fahd1	2240472789	2240474261	17	1.13e-31	cis	FALSE	NA	upstream_gene_variant	MODIFIER	NA
rs33479334	2239713488	17	Fahd1	2240472789	2240474261	17	1.13e-31	cis	FALSE	LD_Chr_17_2239582522_2239921491	intron_variant	MODIFIER	NA
rs29537467	2239726008	17	Fahd1	2240472789	2240474261	17	1.13e-31	cis	FALSE	LD_Chr_17_2239582522_2239921491	downstream_gene_variant	MODIFIER	NA
rs33180218	2239740146	17	Fahd1	2240472789	2240474261	17	1.13e-31	cis	FALSE	LD_Chr_17_2239582522_2239921491	intron_variant	MODIFIER	NA
rs33581905	2239692202	17	Fahd1	2240472789	2240474261	17	1.13e-31	cis	FALSE	LD_Chr_17_2239582522_2239921491	upstream_gene_variant	MODIFIER	NA
rs29521745	2239692329	17	Fahd1	2240472789	2240474261	17	1.13e-31	cis	FALSE	LD_Chr_17_2239582522_2239921491	intron_variant	MODIFIER	NA
rs47787400	2239805918	17	Fahd1	2240472789	2240474261	17	1.13e-31	cis	FALSE	LD_Chr_17_2239582522_2239921491	intron_variant	MODIFIER	NA
rs47326685	2239818699	17	Fahd1	2240472789	2240474261	17	1.13e-31	cis	FALSE	LD_Chr_17_2239582522_2239921491	intron_variant	MODIFIER	NA
rs47488742	2239854416	17	Fahd1	2240472789	2240474261	17	1.13e-31	cis	FALSE	LD_Chr_17_2239582522_2239921491	downstream_gene_variant	MODIFIER	NA
rs48311158	2239863109	17	Fahd1	2240472789	2240474261	17	1.13e-31	cis	FALSE	LD_Chr_17_2239582522_2239921491	upstream_gene_variant	MODIFIER	NA
rs33412697	2239909664	17	Fahd1	2240472789	2240474261	17	1.13e-31	cis	FALSE	LD_Chr_17_2239582522_2239921491	synonymous_variant	LOW	NA
rs49297548	2239921491	17	Fahd1	2240472789	2240474261	17	1.13e-31	cis	FALSE	NA	intron_variant	MODIFIER	NA
rs52624537	2239931125	17	Fahd1	2240472789	2240474261	17	1.13e-31	cis	FALSE	LD_Chr_17_2239927735_2240023930	NA	NA	NA
rs33412785	2239942571	17	Fahd1	2240472789	2240474261	17	1.13e-31	cis	FALSE	LD_Chr_17_2239927735_2240023930	intron_variant	MODIFIER	NA
rs29521021	2240023860	17	Fahd1	2240472789	2240474261	17	1.13e-31	cis	FALSE	LD_Chr_17_2239927735_2240023930	synonymous_variant	LOW	NA
rs33349914	2240023930	17	Fahd1	2240472789	2240474261	17	1.13e-31	cis	FALSE	NA	missense_variant	MODERATE	NA
rs33474601	2240065603	17	Fahd1	2240472789	2240474261	17	1.13e-31	cis	FALSE	NA	downstream_gene_variant	MODIFIER	NA
rs29535189	2240143489	17	Fahd1	2240472789	2240474261	17	1.13e-31	cis	FALSE	LD_Chr_17_2240065603_2240357262	intron_variant	MODIFIER	NA
rs33496904	2240187271	17	Fahd1	2240472789	2240474261	17	1.13e-31	cis	FALSE	LD_Chr_17_2240065603_2240357262	upstream_gene_variant	MODIFIER	NA
rs33443257	2240201163	17	Fahd1	2240472789	2240474261	17	1.13e-31	cis	FALSE	LD_Chr_17_2240065603_2240357262	upstream_gene_variant	MODIFIER	NA
rs3706215	2240208524	17	Fahd1	2240472789	2240474261	17	1.13e-31	cis	FALSE	LD_Chr_17_2240065603_2240357262	intron_variant	MODIFIER	NA
rs33464874	2240230901	17	Fahd1	2240472789	2240474261	17	1.13e-31	cis	FALSE	LD_Chr_17_2240065603_2240357262	intron_variant	MODIFIER	NA
rs33720516	2240231142	17	Fahd1	2240472789	2240474261	17	1.13e-31	cis	FALSE	LD_Chr_17_2240065603_2240357262	upstream_gene_variant	MODIFIER	NA
rs48277664	2240298270	17	Fahd1	2240472789	2240474261	17	1.13e-31	cis	FALSE	LD_Chr_17_2240065603_2240357262	intron_variant	MODIFIER	NA
rs48776143	2240299497	17	Fahd1	2240472789	2240474261	17	1.13e-31	cis	FALSE	LD_Chr_17_2240065603_2240357262	upstream_gene_variant	MODIFIER	NA
rs33328652	2240310446	17	Fahd1	2240472789	2240474261	17	1.13e-31	cis	FALSE	LD_Chr_17_2240065603_2240357262	downstream_gene_variant	MODIFIER	NA
rs33181193	2239754537	17	Fahd1	2240472789	2240474261	17	1.13e-31	cis	FALSE	LD_Chr_17_2239582522_2239921491	intron_variant	MODIFIER	NA
rs29504987	2239754627	17	Fahd1	2240472789	2240474261	17	1.13e-31	cis	FALSE	LD_Chr_17_2239582522_2239921491	non_coding_transcript_variant	MODIFIER	NA
rs47570485	2239873970	17	Fahd1	2240472789	2240474261	17	1.13e-31	cis	FALSE	LD_Chr_17_2239582522_2239921491	intron_variant	MODIFIER	NA
rs6237073	2239902584	17	Fahd1	2240472789	2240474261	17	1.13e-31	cis	FALSE	LD_Chr_17_2239582522_2239921491	intron_variant	MODIFIER	NA
rs33112397	2239984507	17	Fahd1	2240472789	2240474261	17	1.13e-31	cis	FALSE	LD_Chr_17_2239927735_2240023930	intron_variant	MODIFIER	NA
rs3693177	2239991793	17	Fahd1	2240472789	2240474261	17	1.13e-31	cis	FALSE	LD_Chr_17_2239927735_2240023930	intron_variant	MODIFIER	NA
rs3707151	2239995582	17	Fahd1	2240472789	2240474261	17	1.13e-31	cis	FALSE	LD_Chr_17_2239927735_2240023930	intron_variant	MODIFIER	NA
rs33217278	2240123504	17	Fahd1	2240472789	2240474261	17	1.13e-31	cis	FALSE	LD_Chr_17_2240065603_2240357262	upstream_gene_variant	MODIFIER	NA
rs33512004	2240269368	17	Fahd1	2240472789	2240474261	17	1.13e-31	cis	FALSE	LD_Chr_17_2240065603_2240357262	upstream_gene_variant	MODIFIER	NA
rs33156168	2240445626	17	Fahd1	2240472789	2240474261	17	1.13e-31	cis	FALSE	LD_Chr_17_2240361950_2241076094	NMD_transcript_variant	MODIFIER	NA
rs33414418	2240134599	17	Fahd1	2240472789	2240474261	17	1.13e-31	cis	FALSE	LD_Chr_17_2240065603_2240357262	downstream_gene_variant	MODIFIER	NA
rs33316615	2240323472	17	Fahd1	2240472789	2240474261	17	1.17e-31	cis	FALSE	LD_Chr_17_2240065603_2240357262	upstream_gene_variant	MODIFIER	NA
rs33434027	2240275294	17	Fahd1	2240472789	2240474261	17	1.17e-31	cis	FALSE	LD_Chr_17_2240065603_2240357262	upstream_gene_variant	MODIFIER	NA
rs51263665	2240071365	17	Fahd1	2240472789	2240474261	17	1.17e-31	cis	FALSE	LD_Chr_17_2240065603_2240357262	upstream_gene_variant	MODIFIER	NA
rs31899905	2092483660	15	Mpst	2091778860	2091786457	15	1.48e-31	cis	FALSE	LD_Chr_15_2092448518_2092605373	non_coding_transcript_variant	MODIFIER	NA
rs31581723	2092502721	15	Mpst	2091778860	2091786457	15	1.48e-31	cis	FALSE	LD_Chr_15_2092448518_2092605373	downstream_gene_variant	MODIFIER	NA
rs31582519	2092519733	15	Mpst	2091778860	2091786457	15	1.48e-31	cis	FALSE	LD_Chr_15_2092448518_2092605373	upstream_gene_variant	MODIFIER	NA
rs31581407	2092526373	15	Mpst	2091778860	2091786457	15	1.48e-31	cis	FALSE	LD_Chr_15_2092448518_2092605373	downstream_gene_variant	MODIFIER	NA
rs31582390	2092487449	15	Mpst	2091778860	2091786457	15	1.48e-31	cis	FALSE	LD_Chr_15_2092448518_2092605373	intron_variant	MODIFIER	NA
rs31564130	2092513282	15	Mpst	2091778860	2091786457	15	1.48e-31	cis	FALSE	LD_Chr_15_2092448518_2092605373	NMD_transcript_variant	MODIFIER	NA
rs31587815	2092517840	15	Mpst	2091778860	2091786457	15	1.48e-31	cis	FALSE	LD_Chr_15_2092448518_2092605373	upstream_gene_variant	MODIFIER	NA
rs31585926	2092522536	15	Mpst	2091778860	2091786457	15	1.48e-31	cis	FALSE	LD_Chr_15_2092448518_2092605373	downstream_gene_variant	MODIFIER	NA
rs47847466	93790440	1	D2hgdh	93824909	93852348	1	1.61e-31	cis	FALSE	LD_Chr_1_93692658_94038305	downstream_gene_variant	MODIFIER	NA
rs27625989	677501220	4	Aldh4a1	677247741	677274565	4	2.16e-31	cis	FALSE	LD_Chr_4_677313154_677590848	intergenic_variant	MODIFIER	NA
rs27643095	677690098	4	Aldh4a1	677247741	677274565	4	2.16e-31	cis	FALSE	LD_Chr_4_677652450_678206916	intron_variant	MODIFIER	NA
rs27643120	677686697	4	Aldh4a1	677247741	677274565	4	2.16e-31	cis	FALSE	LD_Chr_4_677652450_678206916	intron_variant	MODIFIER	NA
rs32956752	677492191	4	Aldh4a1	677247741	677274565	4	2.16e-31	cis	FALSE	LD_Chr_4_677313154_677590848	intergenic_variant	MODIFIER	NA
rs27612037	677526597	4	Aldh4a1	677247741	677274565	4	2.16e-31	cis	FALSE	LD_Chr_4_677313154_677590848	intergenic_variant	MODIFIER	NA
rs27612003	677532642	4	Aldh4a1	677247741	677274565	4	2.16e-31	cis	FALSE	LD_Chr_4_677313154_677590848	upstream_gene_variant	MODIFIER	NA
rs13482664	2092749618	15	Mpst	2091778860	2091786457	15	2.22e-31	cis	FALSE	NA	synonymous_variant	LOW	NA
rs31576565	2092725080	15	Mpst	2091778860	2091786457	15	2.22e-31	cis	FALSE	NA	intron_variant	MODIFIER	NA
rs31679551	2093060910	15	Mpst	2091778860	2091786457	15	2.22e-31	cis	FALSE	LD_Chr_15_2093037267_2093095561	upstream_gene_variant	MODIFIER	NA
rs29572295	1861245448	13	Cmya5	1861089274	1861193285	13	2.5e-31	cis	FALSE	LD_Chr_13_1860757122_1861913824	upstream_gene_variant	MODIFIER	NA
rs31590557	2092603528	15	Mpst	2091778860	2091786457	15	3.13e-31	cis	FALSE	LD_Chr_15_2092448518_2092605373	intron_variant	MODIFIER	NA
rs31589799	2092604659	15	Mpst	2091778860	2091786457	15	3.13e-31	cis	FALSE	LD_Chr_15_2092448518_2092605373	non_coding_transcript_variant	MODIFIER	NA
rs31571557	2092311589	15	Mpst	2091778860	2091786457	15	3.13e-31	cis	FALSE	LD_Chr_15_2092244304_2092334123	intron_variant	MODIFIER	NA
rs30573828	2092323589	15	Mpst	2091778860	2091786457	15	3.13e-31	cis	FALSE	LD_Chr_15_2092244304_2092334123	intron_variant	MODIFIER	NA
rs31590581	2092605106	15	Mpst	2091778860	2091786457	15	3.13e-31	cis	FALSE	LD_Chr_15_2092448518_2092605373	intron_variant	MODIFIER	NA
rs31590583	2092605373	15	Mpst	2091778860	2091786457	15	3.13e-31	cis	FALSE	NA	non_coding_transcript_variant	MODIFIER	NA
rs31577208	2092309859	15	Mpst	2091778860	2091786457	15	3.13e-31	cis	FALSE	LD_Chr_15_2092244304_2092334123	downstream_gene_variant	MODIFIER	NA
rs13475986	93261707	1	D2hgdh	93824909	93852348	1	3.15e-31	cis	FALSE	LD_Chr_1_93106085_93526021	synonymous_variant	LOW	NA
rs3654404	677206353	4	Aldh4a1	677247741	677274565	4	3.25e-31	cis	FALSE	LD_Chr_4_676629220_677256778	intron_variant	MODIFIER	NA
rs38045065	2093293861	15	Mpst	2091778860	2091786457	15	3.26e-31	cis	FALSE	LD_Chr_15_2093113077_2093335325	synonymous_variant	LOW	NA
rs29781730	1861933286	13	Cmya5	1861089274	1861193285	13	4.33e-31	cis	FALSE	NA	intron_variant	MODIFIER	NA
rs33300188	2240032581	17	Fahd1	2240472789	2240474261	17	4.42e-31	cis	FALSE	LD_Chr_17_2240030846_2240041859	synonymous_variant	LOW	NA
rs31576330	2092309261	15	Mpst	2091778860	2091786457	15	5.06e-31	cis	FALSE	LD_Chr_15_2092244304_2092334123	intron_variant	MODIFIER	NA
rs31580731	2092497118	15	Mpst	2091778860	2091786457	15	5.78e-31	cis	FALSE	LD_Chr_15_2092448518_2092605373	upstream_gene_variant	MODIFIER	NA
rs31986188	2092965825	15	Mpst	2091778860	2091786457	15	6.77e-31	cis	FALSE	LD_Chr_15_2092815637_2093006736	downstream_gene_variant	MODIFIER	NA
rs32417036	161363497	1	Prdx6	161240112	161251219	1	6.77e-31	cis	FALSE	LD_Chr_1_161244832_161467303	intergenic_variant	MODIFIER	NA
rs31571785	2092267030	15	Mpst	2091778860	2091786457	15	7.07e-31	cis	FALSE	LD_Chr_15_2092244304_2092334123	downstream_gene_variant	MODIFIER	NA
rs32036056	2093006736	15	Mpst	2091778860	2091786457	15	7.4e-31	cis	FALSE	NA	intron_variant	MODIFIER	NA
rs33718329	2240452235	17	Fahd1	2240472789	2240474261	17	9.35e-31	cis	FALSE	LD_Chr_17_2240361950_2241076094	intron_variant	MODIFIER	NA
rs31924073	2092575151	15	Mpst	2091778860	2091786457	15	1.01e-30	cis	FALSE	LD_Chr_15_2092448518_2092605373	non_coding_transcript_variant	MODIFIER	NA
rs31144348	94269488	1	D2hgdh	93824909	93852348	1	1.36e-30	cis	FALSE	LD_Chr_1_94192520_94523242	intergenic_variant	MODIFIER	NA
rs33058379	2239796318	17	Fahd1	2240472789	2240474261	17	1.46e-30	cis	FALSE	LD_Chr_17_2239582522_2239921491	upstream_gene_variant	MODIFIER	NA
rs31601404	2092761970	15	Mpst	2091778860	2091786457	15	1.75e-30	cis	FALSE	LD_Chr_15_2092749618_2092796270	non_coding_transcript_variant	MODIFIER	NA
rs48886503	2239778300	17	Fahd1	2240472789	2240474261	17	2.34e-30	cis	FALSE	LD_Chr_17_2239582522_2239921491	downstream_gene_variant	MODIFIER	NA
rs29500670	2239860723	17	Fahd1	2240472789	2240474261	17	2.34e-30	cis	FALSE	LD_Chr_17_2239582522_2239921491	downstream_gene_variant	MODIFIER	NA
rs33594489	2239854202	17	Fahd1	2240472789	2240474261	17	2.34e-30	cis	FALSE	LD_Chr_17_2239582522_2239921491	non_coding_transcript_variant	MODIFIER	NA
rs27626660	677734874	4	Aldh4a1	677247741	677274565	4	2.66e-30	cis	FALSE	LD_Chr_4_677652450_678206916	intron_variant	MODIFIER	NA
rs27626195	677410243	4	Aldh4a1	677247741	677274565	4	2.73e-30	cis	FALSE	LD_Chr_4_677313154_677590848	intron_variant	MODIFIER	NA
rs31570172	2092244304	15	Mpst	2091778860	2091786457	15	3.02e-30	cis	FALSE	NA	upstream_gene_variant	MODIFIER	NA
rs33708165	2240383392	17	Fahd1	2240472789	2240474261	17	3.08e-30	cis	FALSE	LD_Chr_17_2240361950_2241076094	downstream_gene_variant	MODIFIER	NA
rs33683683	2239743613	17	Fahd1	2240472789	2240474261	17	3.15e-30	cis	FALSE	LD_Chr_17_2239582522_2239921491	non_coding_transcript_variant	MODIFIER	NA
rs33588410	2240119821	17	Fahd1	2240472789	2240474261	17	3.15e-30	cis	FALSE	LD_Chr_17_2240065603_2240357262	non_coding_transcript_variant	MODIFIER	NA
rs33259957	2240119989	17	Fahd1	2240472789	2240474261	17	3.15e-30	cis	FALSE	LD_Chr_17_2240065603_2240357262	intron_variant	MODIFIER	NA
rs46388766	2239845284	17	Fahd1	2240472789	2240474261	17	4.54e-30	cis	FALSE	LD_Chr_17_2239582522_2239921491	downstream_gene_variant	MODIFIER	NA
rs30385276	93348696	1	D2hgdh	93824909	93852348	1	4.65e-30	cis	FALSE	LD_Chr_1_93106085_93526021	intron_variant	MODIFIER	NA
rs30383218	93404123	1	D2hgdh	93824909	93852348	1	4.65e-30	cis	FALSE	LD_Chr_1_93106085_93526021	downstream_gene_variant	MODIFIER	NA
rs30363999	93469049	1	D2hgdh	93824909	93852348	1	4.65e-30	cis	FALSE	LD_Chr_1_93106085_93526021	intron_variant	MODIFIER	NA
rs30358088	93496124	1	D2hgdh	93824909	93852348	1	4.65e-30	cis	FALSE	LD_Chr_1_93106085_93526021	intron_variant	MODIFIER	NA
rs30385538	93295909	1	D2hgdh	93824909	93852348	1	4.65e-30	cis	FALSE	LD_Chr_1_93106085_93526021	non_coding_transcript_variant	MODIFIER	NA
rs13461144	93304940	1	D2hgdh	93824909	93852348	1	4.65e-30	cis	FALSE	LD_Chr_1_93106085_93526021	non_coding_transcript_exon_variant	MODIFIER	NA
rs30384458	93316866	1	D2hgdh	93824909	93852348	1	4.65e-30	cis	FALSE	LD_Chr_1_93106085_93526021	downstream_gene_variant	MODIFIER	NA
rs33196821	2240341820	17	Fahd1	2240472789	2240474261	17	4.86e-30	cis	FALSE	LD_Chr_17_2240065603_2240357262	intron_variant	MODIFIER	NA
rs47692957	160073536	1	Prdx6	161240112	161251219	1	5.47e-30	cis	FALSE	LD_Chr_1_160063892_160110236	downstream_gene_variant	MODIFIER	NA
rs30801213	160079470	1	Prdx6	161240112	161251219	1	5.47e-30	cis	FALSE	LD_Chr_1_160063892_160110236	upstream_gene_variant	MODIFIER	NA
rs30380813	93276794	1	D2hgdh	93824909	93852348	1	5.82e-30	cis	FALSE	LD_Chr_1_93106085_93526021	non_coding_transcript_variant	MODIFIER	NA
rs32307550	2092969207	15	Mpst	2091778860	2091786457	15	6.26e-30	cis	FALSE	LD_Chr_15_2092815637_2093006736	NMD_transcript_variant	MODIFIER	NA
rs27547612	676802826	4	Aldh4a1	677247741	677274565	4	6.44e-30	cis	FALSE	LD_Chr_4_676629220_677256778	non_coding_transcript_variant	MODIFIER	NA
rs32332887	2092563105	15	Mpst	2091778860	2091786457	15	8.4e-30	cis	FALSE	LD_Chr_15_2092448518_2092605373	non_coding_transcript_variant	MODIFIER	NA
rs31544157	171269985	1	Mpz	171150711	171161130	1	9.4e-30	cis	FALSE	NA	upstream_gene_variant	MODIFIER	+
rs49525415	2240277869	17	Fahd1	2240472789	2240474261	17	9.87e-30	cis	FALSE	LD_Chr_17_2240065603_2240357262	upstream_gene_variant	MODIFIER	NA
rs33192989	2240101992	17	Fahd1	2240472789	2240474261	17	9.87e-30	cis	FALSE	LD_Chr_17_2240065603_2240357262	intron_variant	MODIFIER	NA
rs13470411	171288826	1	Mpz	171150711	171161130	1	1.12e-29	cis	FALSE	LD_Chr_1_171285646_171334625	non_coding_transcript_exon_variant	MODIFIER	+
rs31991464	171296427	1	Mpz	171150711	171161130	1	1.12e-29	cis	FALSE	LD_Chr_1_171285646_171334625	upstream_gene_variant	MODIFIER	+
rs31551208	171297915	1	Mpz	171150711	171161130	1	1.12e-29	cis	FALSE	LD_Chr_1_171285646_171334625	upstream_gene_variant	MODIFIER	+
rs31277155	171342027	1	Mpz	171150711	171161130	1	1.12e-29	cis	FALSE	NA	upstream_gene_variant	MODIFIER	+
rs31551026	171350073	1	Mpz	171150711	171161130	1	1.12e-29	cis	FALSE	LD_Chr_1_171342027_171397409	upstream_gene_variant	MODIFIER	+
rs3707570	171369014	1	Mpz	171150711	171161130	1	1.12e-29	cis	FALSE	LD_Chr_1_171342027_171397409	upstream_gene_variant	MODIFIER	+
rs30862920	171191690	1	Mpz	171150711	171161130	1	1.12e-29	cis	FALSE	NA	intron_variant	MODIFIER	+
rs49193140	171090842	1	Mpz	171150711	171161130	1	1.12e-29	cis	FALSE	LD_Chr_1_171057436_171191690	intergenic_variant	MODIFIER	+
rs31539537	171582972	1	Mpz	171150711	171161130	1	1.12e-29	cis	FALSE	LD_Chr_1_171438247_172381513	NMD_transcript_variant	MODIFIER	+
rs31537454	171589271	1	Mpz	171150711	171161130	1	1.12e-29	cis	FALSE	LD_Chr_1_171438247_172381513	intron_variant	MODIFIER	+
rs3718911	171695858	1	Mpz	171150711	171161130	1	1.12e-29	cis	FALSE	LD_Chr_1_171438247_172381513	missense_variant	MODERATE	+
rs31530270	171696579	1	Mpz	171150711	171161130	1	1.12e-29	cis	FALSE	LD_Chr_1_171438247_172381513	intron_variant	MODIFIER	+
rs30718255	171744758	1	Mpz	171150711	171161130	1	1.12e-29	cis	FALSE	LD_Chr_1_171438247_172381513	intergenic_variant	MODIFIER	+
rs32537266	171778416	1	Mpz	171150711	171161130	1	1.12e-29	cis	FALSE	LD_Chr_1_171438247_172381513	non_coding_transcript_variant	MODIFIER	+
rs31437168	171833888	1	Mpz	171150711	171161130	1	1.12e-29	cis	FALSE	LD_Chr_1_171438247_172381513	intergenic_variant	MODIFIER	+
rs32649041	172012068	1	Mpz	171150711	171161130	1	1.12e-29	cis	FALSE	LD_Chr_1_171438247_172381513	intron_variant	MODIFIER	+
rs31752475	172012379	1	Mpz	171150711	171161130	1	1.12e-29	cis	FALSE	LD_Chr_1_171438247_172381513	upstream_gene_variant	MODIFIER	+
rs32325723	172018615	1	Mpz	171150711	171161130	1	1.12e-29	cis	FALSE	LD_Chr_1_171438247_172381513	intron_variant	MODIFIER	+
rs31579146	172098365	1	Mpz	171150711	171161130	1	1.12e-29	cis	FALSE	LD_Chr_1_171438247_172381513	non_coding_transcript_variant	MODIFIER	+
rs31605177	172098989	1	Mpz	171150711	171161130	1	1.12e-29	cis	FALSE	LD_Chr_1_171438247_172381513	upstream_gene_variant	MODIFIER	+
rs31609903	172138049	1	Mpz	171150711	171161130	1	1.12e-29	cis	FALSE	LD_Chr_1_171438247_172381513	downstream_gene_variant	MODIFIER	+
rs31576681	172138234	1	Mpz	171150711	171161130	1	1.12e-29	cis	FALSE	LD_Chr_1_171438247_172381513	downstream_gene_variant	MODIFIER	+
rs32572367	172169532	1	Mpz	171150711	171161130	1	1.12e-29	cis	FALSE	LD_Chr_1_171438247_172381513	non_coding_transcript_variant	MODIFIER	+
rs30688838	172093547	1	Mpz	171150711	171161130	1	1.12e-29	cis	FALSE	LD_Chr_1_171438247_172381513	downstream_gene_variant	MODIFIER	+
rs48121085	171057965	1	Mpz	171150711	171161130	1	1.12e-29	cis	FALSE	LD_Chr_1_171057436_171191690	non_coding_transcript_exon_variant	MODIFIER	+
rs49256111	171061311	1	Mpz	171150711	171161130	1	1.12e-29	cis	FALSE	LD_Chr_1_171057436_171191690	downstream_gene_variant	MODIFIER	+
rs8245256	171247008	1	Mpz	171150711	171161130	1	1.12e-29	cis	FALSE	LD_Chr_1_171234692_171269985	upstream_gene_variant	MODIFIER	+
rs31551428	171369609	1	Mpz	171150711	171161130	1	1.12e-29	cis	FALSE	LD_Chr_1_171342027_171397409	upstream_gene_variant	MODIFIER	+
rs31554178	171384101	1	Mpz	171150711	171161130	1	1.12e-29	cis	FALSE	LD_Chr_1_171342027_171397409	intron_variant	MODIFIER	+
rs31535302	171490357	1	Mpz	171150711	171161130	1	1.12e-29	cis	FALSE	LD_Chr_1_171438247_172381513	intergenic_variant	MODIFIER	+
rs31537962	171527620	1	Mpz	171150711	171161130	1	1.12e-29	cis	FALSE	LD_Chr_1_171438247_172381513	downstream_gene_variant	MODIFIER	+
rs31532480	171684529	1	Mpz	171150711	171161130	1	1.12e-29	cis	FALSE	LD_Chr_1_171438247_172381513	intron_variant	MODIFIER	+
rs31536633	171589634	1	Mpz	171150711	171161130	1	1.12e-29	cis	FALSE	LD_Chr_1_171438247_172381513	downstream_gene_variant	MODIFIER	+
rs3726863	171593907	1	Mpz	171150711	171161130	1	1.12e-29	cis	FALSE	LD_Chr_1_171438247_172381513	NMD_transcript_variant	MODIFIER	+
rs31530225	171751194	1	Mpz	171150711	171161130	1	1.12e-29	cis	FALSE	LD_Chr_1_171438247_172381513	intergenic_variant	MODIFIER	+
rs31530732	171845606	1	Mpz	171150711	171161130	1	1.12e-29	cis	FALSE	LD_Chr_1_171438247_172381513	non_coding_transcript_variant	MODIFIER	+
rs31530730	171845877	1	Mpz	171150711	171161130	1	1.12e-29	cis	FALSE	LD_Chr_1_171438247_172381513	non_coding_transcript_variant	MODIFIER	+
rs31281902	171948902	1	Mpz	171150711	171161130	1	1.12e-29	cis	FALSE	LD_Chr_1_171438247_172381513	downstream_gene_variant	MODIFIER	+
rs31582680	172060216	1	Mpz	171150711	171161130	1	1.12e-29	cis	FALSE	LD_Chr_1_171438247_172381513	upstream_gene_variant	MODIFIER	+
rs31580807	172065168	1	Mpz	171150711	171161130	1	1.12e-29	cis	FALSE	LD_Chr_1_171438247_172381513	downstream_gene_variant	MODIFIER	+
rs31528060	171983630	1	Mpz	171150711	171161130	1	1.12e-29	cis	FALSE	LD_Chr_1_171438247_172381513	intergenic_variant	MODIFIER	+
rs31576916	172091334	1	Mpz	171150711	171161130	1	1.12e-29	cis	FALSE	LD_Chr_1_171438247_172381513	non_coding_transcript_variant	MODIFIER	+
rs31246865	172154578	1	Mpz	171150711	171161130	1	1.12e-29	cis	FALSE	LD_Chr_1_171438247_172381513	intron_variant	MODIFIER	+
rs31577638	172160885	1	Mpz	171150711	171161130	1	1.12e-29	cis	FALSE	LD_Chr_1_171438247_172381513	non_coding_transcript_variant	MODIFIER	+
rs31927674	2092983212	15	Mpst	2091778860	2091786457	15	1.15e-29	cis	FALSE	LD_Chr_15_2092815637_2093006736	downstream_gene_variant	MODIFIER	NA
rs30361966	93426683	1	D2hgdh	93824909	93852348	1	1.26e-29	cis	FALSE	LD_Chr_1_93106085_93526021	intron_variant	MODIFIER	NA
rs37295682	94235434	1	D2hgdh	93824909	93852348	1	1.28e-29	cis	FALSE	LD_Chr_1_94192520_94523242	intergenic_variant	MODIFIER	NA
rs33699861	2240100671	17	Fahd1	2240472789	2240474261	17	1.34e-29	cis	FALSE	LD_Chr_17_2240065603_2240357262	downstream_gene_variant	MODIFIER	NA
rs31603295	2093648326	15	Mpst	2091778860	2091786457	15	1.5e-29	cis	FALSE	LD_Chr_15_2093520056_2094599319	intergenic_variant	MODIFIER	NA
rs49372480	2239797388	17	Fahd1	2240472789	2240474261	17	1.54e-29	cis	FALSE	LD_Chr_17_2239582522_2239921491	upstream_gene_variant	MODIFIER	NA
rs46986660	2239844971	17	Fahd1	2240472789	2240474261	17	1.54e-29	cis	FALSE	LD_Chr_17_2239582522_2239921491	non_coding_transcript_exon_variant	MODIFIER	NA
rs33610892	2239721564	17	Fahd1	2240472789	2240474261	17	1.54e-29	cis	FALSE	LD_Chr_17_2239582522_2239921491	intron_variant	MODIFIER	NA
rs50770986	2239727170	17	Fahd1	2240472789	2240474261	17	1.54e-29	cis	FALSE	LD_Chr_17_2239582522_2239921491	intron_variant	MODIFIER	NA
rs29500882	2239727193	17	Fahd1	2240472789	2240474261	17	1.54e-29	cis	FALSE	LD_Chr_17_2239582522_2239921491	intron_variant	MODIFIER	NA
rs27591855	677654880	4	Aldh4a1	677247741	677274565	4	2.98e-29	cis	FALSE	LD_Chr_4_677652450_678206916	intron_variant	MODIFIER	NA
rs51418056	2240361950	17	Fahd1	2240472789	2240474261	17	3.27e-29	cis	FALSE	NA	downstream_gene_variant	MODIFIER	NA
rs31548337	171334625	1	Mpz	171150711	171161130	1	3.62e-29	cis	FALSE	NA	intron_variant	MODIFIER	+
rs31379067	171696174	1	Mpz	171150711	171161130	1	3.65e-29	cis	FALSE	LD_Chr_1_171438247_172381513	intron_variant	MODIFIER	+
rs31532197	171949428	1	Mpz	171150711	171161130	1	4.1e-29	cis	FALSE	LD_Chr_1_171438247_172381513	downstream_gene_variant	MODIFIER	+
rs31526492	171991896	1	Mpz	171150711	171161130	1	4.25e-29	cis	FALSE	LD_Chr_1_171438247_172381513	intergenic_variant	MODIFIER	+
rs27577569	676629220	4	Aldh4a1	677247741	677274565	4	4.3e-29	cis	FALSE	NA	intron_variant	MODIFIER	NA
rs27562794	676744213	4	Aldh4a1	677247741	677274565	4	4.3e-29	cis	FALSE	LD_Chr_4_676629220_677256778	non_coding_transcript_variant	MODIFIER	NA
rs27584261	676882834	4	Aldh4a1	677247741	677274565	4	4.3e-29	cis	FALSE	LD_Chr_4_676629220_677256778	intron_variant	MODIFIER	NA
rs27584143	676906353	4	Aldh4a1	677247741	677274565	4	4.3e-29	cis	FALSE	LD_Chr_4_676629220_677256778	intron_variant	MODIFIER	NA
rs27562110	676230659	4	Aldh4a1	677247741	677274565	4	4.3e-29	cis	FALSE	LD_Chr_4_676163577_676576704	NMD_transcript_variant	MODIFIER	NA
rs27575176	676351705	4	Aldh4a1	677247741	677274565	4	4.3e-29	cis	FALSE	LD_Chr_4_676163577_676576704	intron_variant	MODIFIER	NA
rs27575020	676374740	4	Aldh4a1	677247741	677274565	4	4.3e-29	cis	FALSE	LD_Chr_4_676163577_676576704	downstream_gene_variant	MODIFIER	NA
rs27560519	676391819	4	Aldh4a1	677247741	677274565	4	4.3e-29	cis	FALSE	LD_Chr_4_676163577_676576704	intergenic_variant	MODIFIER	NA
rs27560473	676410660	4	Aldh4a1	677247741	677274565	4	4.3e-29	cis	FALSE	LD_Chr_4_676163577_676576704	downstream_gene_variant	MODIFIER	NA
rs27544439	676545852	4	Aldh4a1	677247741	677274565	4	4.3e-29	cis	FALSE	LD_Chr_4_676163577_676576704	intergenic_variant	MODIFIER	NA
rs27547591	676808331	4	Aldh4a1	677247741	677274565	4	4.3e-29	cis	FALSE	LD_Chr_4_676629220_677256778	upstream_gene_variant	MODIFIER	NA
rs32336317	676688955	4	Aldh4a1	677247741	677274565	4	4.3e-29	cis	FALSE	LD_Chr_4_676629220_677256778	downstream_gene_variant	MODIFIER	NA
rs32839999	676688972	4	Aldh4a1	677247741	677274565	4	4.3e-29	cis	FALSE	LD_Chr_4_676629220_677256778	intron_variant	MODIFIER	NA
rs27562861	676733035	4	Aldh4a1	677247741	677274565	4	4.3e-29	cis	FALSE	LD_Chr_4_676629220_677256778	non_coding_transcript_variant	MODIFIER	NA
rs27562828	676739892	4	Aldh4a1	677247741	677274565	4	4.3e-29	cis	FALSE	LD_Chr_4_676629220_677256778	upstream_gene_variant	MODIFIER	NA
rs27562711	676767983	4	Aldh4a1	677247741	677274565	4	4.3e-29	cis	FALSE	LD_Chr_4_676629220_677256778	intergenic_variant	MODIFIER	NA
rs13478015	676780136	4	Aldh4a1	677247741	677274565	4	4.3e-29	cis	FALSE	LD_Chr_4_676629220_677256778	downstream_gene_variant	MODIFIER	NA
rs32036736	676536181	4	Aldh4a1	677247741	677274565	4	4.3e-29	cis	FALSE	LD_Chr_4_676163577_676576704	intron_variant	MODIFIER	NA
rs32977838	676609829	4	Aldh4a1	677247741	677274565	4	4.3e-29	cis	FALSE	LD_Chr_4_676577877_676614316	intron_variant	MODIFIER	NA
rs27577477	676654508	4	Aldh4a1	677247741	677274565	4	4.3e-29	cis	FALSE	LD_Chr_4_676629220_677256778	intron_variant	MODIFIER	NA
rs27584214	676893642	4	Aldh4a1	677247741	677274565	4	4.3e-29	cis	FALSE	LD_Chr_4_676629220_677256778	intron_variant	MODIFIER	NA
rs27575102	676360007	4	Aldh4a1	677247741	677274565	4	4.3e-29	cis	FALSE	LD_Chr_4_676163577_676576704	intron_variant	MODIFIER	NA
rs27544997	676294148	4	Aldh4a1	677247741	677274565	4	4.3e-29	cis	FALSE	LD_Chr_4_676163577_676576704	intergenic_variant	MODIFIER	NA
rs27544996	676294360	4	Aldh4a1	677247741	677274565	4	4.3e-29	cis	FALSE	LD_Chr_4_676163577_676576704	intergenic_variant	MODIFIER	NA
rs27562186	676215138	4	Aldh4a1	677247741	677274565	4	4.3e-29	cis	FALSE	LD_Chr_4_676163577_676576704	intron_variant	MODIFIER	NA
rs27545222	676254871	4	Aldh4a1	677247741	677274565	4	4.3e-29	cis	FALSE	LD_Chr_4_676163577_676576704	NMD_transcript_variant	MODIFIER	NA
rs27545221	676254961	4	Aldh4a1	677247741	677274565	4	4.3e-29	cis	FALSE	LD_Chr_4_676163577_676576704	NMD_transcript_variant	MODIFIER	NA
rs6308656	676384052	4	Aldh4a1	677247741	677274565	4	4.3e-29	cis	FALSE	LD_Chr_4_676163577_676576704	upstream_gene_variant	MODIFIER	NA
rs32064546	676396341	4	Aldh4a1	677247741	677274565	4	4.3e-29	cis	FALSE	LD_Chr_4_676163577_676576704	upstream_gene_variant	MODIFIER	NA
rs27560300	676473816	4	Aldh4a1	677247741	677274565	4	4.3e-29	cis	FALSE	LD_Chr_4_676163577_676576704	intron_variant	MODIFIER	NA
rs32299746	676477142	4	Aldh4a1	677247741	677274565	4	4.3e-29	cis	FALSE	LD_Chr_4_676163577_676576704	intron_variant	MODIFIER	NA
rs31507136	171582944	1	Mpz	171150711	171161130	1	4.85e-29	cis	FALSE	LD_Chr_1_171438247_172381513	downstream_gene_variant	MODIFIER	+
rs32678315	171039894	1	Mpz	171150711	171161130	1	4.85e-29	cis	FALSE	NA	intergenic_variant	MODIFIER	+
rs6350197	1861147974	13	Cmya5	1861089274	1861193285	13	5.13e-29	cis	TRUE	LD_Chr_13_1860757122_1861913824	intron_variant	MODIFIER	NA
rs13481946	1861449605	13	Cmya5	1861089274	1861193285	13	5.13e-29	cis	FALSE	LD_Chr_13_1860757122_1861913824	intron_variant	MODIFIER	NA
rs38720826	1861118674	13	Cmya5	1861089274	1861193285	13	5.13e-29	cis	TRUE	LD_Chr_13_1860757122_1861913824	upstream_gene_variant	MODIFIER	NA
rs29723715	1861144627	13	Cmya5	1861089274	1861193285	13	5.13e-29	cis	TRUE	LD_Chr_13_1860757122_1861913824	non_coding_transcript_variant	MODIFIER	NA
rs29513282	1861145061	13	Cmya5	1861089274	1861193285	13	5.13e-29	cis	TRUE	LD_Chr_13_1860757122_1861913824	synonymous_variant	LOW	NA
rs29564170	1861057434	13	Cmya5	1861089274	1861193285	13	5.13e-29	cis	FALSE	LD_Chr_13_1860757122_1861913824	intergenic_variant	MODIFIER	NA
rs29239082	1861059916	13	Cmya5	1861089274	1861193285	13	5.13e-29	cis	FALSE	LD_Chr_13_1860757122_1861913824	intergenic_variant	MODIFIER	NA
rs36808858	1861062639	13	Cmya5	1861089274	1861193285	13	5.13e-29	cis	FALSE	LD_Chr_13_1860757122_1861913824	intergenic_variant	MODIFIER	NA
rs29946007	1860951270	13	Cmya5	1861089274	1861193285	13	5.13e-29	cis	FALSE	LD_Chr_13_1860757122_1861913824	non_coding_transcript_variant	MODIFIER	NA
rs3659831	1860954604	13	Cmya5	1861089274	1861193285	13	5.13e-29	cis	FALSE	LD_Chr_13_1860757122_1861913824	non_coding_transcript_variant	MODIFIER	NA
rs47046885	1861704793	13	Cmya5	1861089274	1861193285	13	5.13e-29	cis	FALSE	LD_Chr_13_1860757122_1861913824	3_prime_UTR_variant	MODIFIER	NA
rs29549242	1861781562	13	Cmya5	1861089274	1861193285	13	5.13e-29	cis	FALSE	LD_Chr_13_1860757122_1861913824	intron_variant	MODIFIER	NA
rs40087721	1861319435	13	Cmya5	1861089274	1861193285	13	5.13e-29	cis	FALSE	LD_Chr_13_1860757122_1861913824	intergenic_variant	MODIFIER	NA
rs52309861	1861643037	13	Cmya5	1861089274	1861193285	13	5.13e-29	cis	FALSE	LD_Chr_13_1860757122_1861913824	intergenic_variant	MODIFIER	NA
rs30389297	1861824268	13	Cmya5	1861089274	1861193285	13	5.13e-29	cis	FALSE	LD_Chr_13_1860757122_1861913824	upstream_gene_variant	MODIFIER	NA
rs30389295	1861825785	13	Cmya5	1861089274	1861193285	13	5.13e-29	cis	FALSE	LD_Chr_13_1860757122_1861913824	non_coding_transcript_variant	MODIFIER	NA
rs30383529	1861871799	13	Cmya5	1861089274	1861193285	13	5.13e-29	cis	FALSE	LD_Chr_13_1860757122_1861913824	non_coding_transcript_variant	MODIFIER	NA
rs49745048	1860142381	13	Cmya5	1861089274	1861193285	13	5.13e-29	cis	FALSE	LD_Chr_13_1859954029_1860337674	intron_variant	MODIFIER	NA
rs50578581	2240071455	17	Fahd1	2240472789	2240474261	17	6.71e-29	cis	FALSE	LD_Chr_17_2240065603_2240357262	non_coding_transcript_variant	MODIFIER	NA
rs33551780	2240193779	17	Fahd1	2240472789	2240474261	17	6.71e-29	cis	FALSE	LD_Chr_17_2240065603_2240357262	missense_variant	MODERATE	NA
rs3704579	2240208275	17	Fahd1	2240472789	2240474261	17	6.71e-29	cis	FALSE	LD_Chr_17_2240065603_2240357262	downstream_gene_variant	MODIFIER	NA
rs30388363	1861825871	13	Cmya5	1861089274	1861193285	13	8.53e-29	cis	FALSE	LD_Chr_13_1860757122_1861913824	non_coding_transcript_variant	MODIFIER	NA
rs51924375	2240443304	17	Fahd1	2240472789	2240474261	17	8.81e-29	cis	FALSE	LD_Chr_17_2240361950_2241076094	NMD_transcript_variant	MODIFIER	NA
rs52121566	2239706451	17	Fahd1	2240472789	2240474261	17	9.54e-29	cis	FALSE	LD_Chr_17_2239582522_2239921491	NA	NA	NA
rs33261515	2240421105	17	Fahd1	2240472789	2240474261	17	1.04e-28	cis	FALSE	LD_Chr_17_2240361950_2241076094	intergenic_variant	MODIFIER	NA
rs33754550	161050016	1	Prdx6	161240112	161251219	1	1.29e-28	cis	FALSE	NA	non_coding_transcript_variant	MODIFIER	NA
rs31529720	171848487	1	Mpz	171150711	171161130	1	1.32e-28	cis	FALSE	LD_Chr_1_171438247_172381513	intron_variant	MODIFIER	+
rs31665274	2095368274	15	Mpst	2091778860	2091786457	15	1.43e-28	cis	FALSE	LD_Chr_15_2094901717_2095513963	NMD_transcript_variant	MODIFIER	NA
rs29517215	2239781285	17	Fahd1	2240472789	2240474261	17	1.51e-28	cis	FALSE	LD_Chr_17_2239582522_2239921491	intron_variant	MODIFIER	NA
rs37379393	1861128812	13	Cmya5	1861089274	1861193285	13	1.58e-28	cis	TRUE	LD_Chr_13_1860757122_1861913824	intron_variant	MODIFIER	NA
rs3023864	2239817998	17	Fahd1	2240472789	2240474261	17	1.62e-28	cis	FALSE	LD_Chr_17_2239582522_2239921491	intron_variant	MODIFIER	NA
rs31530267	171696682	1	Mpz	171150711	171161130	1	1.64e-28	cis	FALSE	LD_Chr_1_171438247_172381513	intron_variant	MODIFIER	+
rs31480591	94126070	1	D2hgdh	93824909	93852348	1	1.85e-28	cis	FALSE	LD_Chr_1_94050422_94169057	intergenic_variant	MODIFIER	NA
rs32005963	2093321942	15	Mpst	2091778860	2091786457	15	1.89e-28	cis	FALSE	LD_Chr_15_2093113077_2093335325	intron_variant	MODIFIER	NA
rs45803642	2239911121	17	Fahd1	2240472789	2240474261	17	1.91e-28	cis	FALSE	LD_Chr_17_2239582522_2239921491	intron_variant	MODIFIER	NA
rs33377237	2239796835	17	Fahd1	2240472789	2240474261	17	1.97e-28	cis	FALSE	LD_Chr_17_2239582522_2239921491	downstream_gene_variant	MODIFIER	NA
rs32506046	93513540	1	D2hgdh	93824909	93852348	1	2.02e-28	cis	FALSE	LD_Chr_1_93106085_93526021	downstream_gene_variant	MODIFIER	NA
rs31422803	171746038	1	Mpz	171150711	171161130	1	2.03e-28	cis	FALSE	LD_Chr_1_171438247_172381513	intergenic_variant	MODIFIER	+
rs31539991	171438378	1	Mpz	171150711	171161130	1	2.3e-28	cis	FALSE	LD_Chr_1_171438247_172381513	intron_variant	MODIFIER	+
rs48638268	160077993	1	Prdx6	161240112	161251219	1	2.35e-28	cis	FALSE	LD_Chr_1_160063892_160110236	upstream_gene_variant	MODIFIER	NA
rs3715512	677051388	4	Aldh4a1	677247741	677274565	4	2.38e-28	cis	FALSE	LD_Chr_4_676629220_677256778	intron_variant	MODIFIER	NA
rs31859712	676951680	4	Aldh4a1	677247741	677274565	4	2.38e-28	cis	FALSE	LD_Chr_4_676629220_677256778	intergenic_variant	MODIFIER	NA
rs27567947	676987187	4	Aldh4a1	677247741	677274565	4	2.38e-28	cis	FALSE	LD_Chr_4_676629220_677256778	intron_variant	MODIFIER	NA
rs27568059	676948742	4	Aldh4a1	677247741	677274565	4	2.38e-28	cis	FALSE	LD_Chr_4_676629220_677256778	intergenic_variant	MODIFIER	NA
rs30386457	93311869	1	D2hgdh	93824909	93852348	1	2.69e-28	cis	FALSE	LD_Chr_1_93106085_93526021	upstream_gene_variant	MODIFIER	NA
rs31673641	2095513963	15	Mpst	2091778860	2091786457	15	2.75e-28	cis	FALSE	NA	non_coding_transcript_exon_variant	MODIFIER	NA
rs31675296	2095479540	15	Mpst	2091778860	2091786457	15	2.75e-28	cis	FALSE	LD_Chr_15_2094901717_2095513963	missense_variant	MODERATE	NA
rs30376991	1861926955	13	Cmya5	1861089274	1861193285	13	2.88e-28	cis	FALSE	NA	downstream_gene_variant	MODIFIER	NA
rs32472414	2093089705	15	Mpst	2091778860	2091786457	15	3.65e-28	cis	FALSE	LD_Chr_15_2093037267_2093095561	downstream_gene_variant	MODIFIER	NA
rs32392304	2093095561	15	Mpst	2091778860	2091786457	15	3.65e-28	cis	FALSE	NA	downstream_gene_variant	MODIFIER	NA
rs31651917	2093089666	15	Mpst	2091778860	2091786457	15	3.65e-28	cis	FALSE	LD_Chr_15_2093037267_2093095561	intron_variant	MODIFIER	NA
rs31528917	171816395	1	Mpz	171150711	171161130	1	4.02e-28	cis	FALSE	LD_Chr_1_171438247_172381513	intergenic_variant	MODIFIER	+
rs31534926	171632122	1	Mpz	171150711	171161130	1	4.02e-28	cis	FALSE	LD_Chr_1_171438247_172381513	downstream_gene_variant	MODIFIER	+
rs31534925	171632152	1	Mpz	171150711	171161130	1	4.02e-28	cis	FALSE	LD_Chr_1_171438247_172381513	upstream_gene_variant	MODIFIER	+
rs31516346	171641302	1	Mpz	171150711	171161130	1	4.02e-28	cis	FALSE	LD_Chr_1_171438247_172381513	intron_variant	MODIFIER	+
rs4137216	171645240	1	Mpz	171150711	171161130	1	4.02e-28	cis	FALSE	LD_Chr_1_171438247_172381513	intron_variant	MODIFIER	+
rs31532085	171642648	1	Mpz	171150711	171161130	1	4.02e-28	cis	FALSE	LD_Chr_1_171438247_172381513	intron_variant	MODIFIER	+
rs31548340	171334261	1	Mpz	171150711	171161130	1	4.02e-28	cis	FALSE	LD_Chr_1_171285646_171334625	upstream_gene_variant	MODIFIER	+
rs8242808	171058899	1	Mpz	171150711	171161130	1	4.02e-28	cis	FALSE	LD_Chr_1_171057436_171191690	intron_variant	MODIFIER	+
rs3153981	2240525107	17	Fahd1	2240472789	2240474261	17	4.38e-28	cis	FALSE	LD_Chr_17_2240361950_2241076094	downstream_gene_variant	MODIFIER	NA
rs33397643	2240678236	17	Fahd1	2240472789	2240474261	17	4.38e-28	cis	FALSE	LD_Chr_17_2240361950_2241076094	downstream_gene_variant	MODIFIER	NA
rs33572104	2240716450	17	Fahd1	2240472789	2240474261	17	4.38e-28	cis	FALSE	LD_Chr_17_2240361950_2241076094	non_coding_transcript_variant	MODIFIER	NA
rs33428135	2240743851	17	Fahd1	2240472789	2240474261	17	4.38e-28	cis	FALSE	LD_Chr_17_2240361950_2241076094	upstream_gene_variant	MODIFIER	NA
rs33206090	2240759760	17	Fahd1	2240472789	2240474261	17	4.38e-28	cis	FALSE	LD_Chr_17_2240361950_2241076094	non_coding_transcript_variant	MODIFIER	NA
rs6281767	2240821056	17	Fahd1	2240472789	2240474261	17	4.38e-28	cis	FALSE	LD_Chr_17_2240361950_2241076094	NMD_transcript_variant	MODIFIER	NA
rs3669072	2240909453	17	Fahd1	2240472789	2240474261	17	4.38e-28	cis	FALSE	LD_Chr_17_2240361950_2241076094	intergenic_variant	MODIFIER	NA
rs33456682	2240925401	17	Fahd1	2240472789	2240474261	17	4.38e-28	cis	FALSE	LD_Chr_17_2240361950_2241076094	upstream_gene_variant	MODIFIER	NA
rs33092433	2240925829	17	Fahd1	2240472789	2240474261	17	4.38e-28	cis	FALSE	LD_Chr_17_2240361950_2241076094	upstream_gene_variant	MODIFIER	NA
rs3090500	2240967187	17	Fahd1	2240472789	2240474261	17	4.38e-28	cis	FALSE	LD_Chr_17_2240361950_2241076094	3_prime_UTR_variant	MODIFIER	NA
rs33397205	2241038711	17	Fahd1	2240472789	2240474261	17	4.38e-28	cis	FALSE	LD_Chr_17_2240361950_2241076094	intron_variant	MODIFIER	NA
rs33775006	2241076094	17	Fahd1	2240472789	2240474261	17	4.38e-28	cis	FALSE	NA	upstream_gene_variant	MODIFIER	NA
rs3154010	2240538594	17	Fahd1	2240472789	2240474261	17	4.38e-28	cis	FALSE	LD_Chr_17_2240361950_2241076094	synonymous_variant	LOW	NA
rs3153970	2240521024	17	Fahd1	2240472789	2240474261	17	4.38e-28	cis	FALSE	LD_Chr_17_2240361950_2241076094	downstream_gene_variant	MODIFIER	NA
rs3153979	2240523882	17	Fahd1	2240472789	2240474261	17	4.38e-28	cis	FALSE	LD_Chr_17_2240361950_2241076094	upstream_gene_variant	MODIFIER	NA
rs3154090	2240567005	17	Fahd1	2240472789	2240474261	17	4.38e-28	cis	FALSE	LD_Chr_17_2240361950_2241076094	downstream_gene_variant	MODIFIER	NA
rs3154124	2240581113	17	Fahd1	2240472789	2240474261	17	4.38e-28	cis	FALSE	LD_Chr_17_2240361950_2241076094	non_coding_transcript_variant	MODIFIER	NA
rs3155702	2240594928	17	Fahd1	2240472789	2240474261	17	4.38e-28	cis	FALSE	LD_Chr_17_2240361950_2241076094	intron_variant	MODIFIER	NA
rs3153855	2240627613	17	Fahd1	2240472789	2240474261	17	4.38e-28	cis	FALSE	LD_Chr_17_2240361950_2241076094	intron_variant	MODIFIER	NA
rs33673834	2240690947	17	Fahd1	2240472789	2240474261	17	4.38e-28	cis	FALSE	LD_Chr_17_2240361950_2241076094	non_coding_transcript_variant	MODIFIER	NA
rs33783922	2240705935	17	Fahd1	2240472789	2240474261	17	4.38e-28	cis	FALSE	LD_Chr_17_2240361950_2241076094	upstream_gene_variant	MODIFIER	NA
rs33486903	2240789415	17	Fahd1	2240472789	2240474261	17	4.38e-28	cis	FALSE	LD_Chr_17_2240361950_2241076094	downstream_gene_variant	MODIFIER	NA
rs33373171	2240825059	17	Fahd1	2240472789	2240474261	17	4.38e-28	cis	FALSE	LD_Chr_17_2240361950_2241076094	synonymous_variant	LOW	NA
rs33477225	2240738323	17	Fahd1	2240472789	2240474261	17	4.38e-28	cis	FALSE	LD_Chr_17_2240361950_2241076094	upstream_gene_variant	MODIFIER	NA
rs33777541	2240754747	17	Fahd1	2240472789	2240474261	17	4.38e-28	cis	FALSE	LD_Chr_17_2240361950_2241076094	upstream_gene_variant	MODIFIER	NA
rs33408408	2240770537	17	Fahd1	2240472789	2240474261	17	4.38e-28	cis	FALSE	LD_Chr_17_2240361950_2241076094	intron_variant	MODIFIER	NA
rs3717071	2240774685	17	Fahd1	2240472789	2240474261	17	4.38e-28	cis	FALSE	LD_Chr_17_2240361950_2241076094	downstream_gene_variant	MODIFIER	NA
rs33637512	2240717097	17	Fahd1	2240472789	2240474261	17	4.38e-28	cis	FALSE	LD_Chr_17_2240361950_2241076094	synonymous_variant	LOW	NA
rs33248000	2240899080	17	Fahd1	2240472789	2240474261	17	4.38e-28	cis	FALSE	LD_Chr_17_2240361950_2241076094	upstream_gene_variant	MODIFIER	NA
rs33230651	2240899993	17	Fahd1	2240472789	2240474261	17	4.38e-28	cis	FALSE	LD_Chr_17_2240361950_2241076094	upstream_gene_variant	MODIFIER	NA
rs16785071	2240932888	17	Fahd1	2240472789	2240474261	17	4.38e-28	cis	FALSE	LD_Chr_17_2240361950_2241076094	downstream_gene_variant	MODIFIER	NA
rs16793358	2240933154	17	Fahd1	2240472789	2240474261	17	4.38e-28	cis	FALSE	LD_Chr_17_2240361950_2241076094	intron_variant	MODIFIER	NA
rs33773540	2240963680	17	Fahd1	2240472789	2240474261	17	4.38e-28	cis	FALSE	LD_Chr_17_2240361950_2241076094	downstream_gene_variant	MODIFIER	NA
rs33776207	2241011384	17	Fahd1	2240472789	2240474261	17	4.38e-28	cis	FALSE	LD_Chr_17_2240361950_2241076094	missense_variant	MODERATE	NA
rs33498803	2241026731	17	Fahd1	2240472789	2240474261	17	4.38e-28	cis	FALSE	LD_Chr_17_2240361950_2241076094	intron_variant	MODIFIER	NA
rs33774222	2241026977	17	Fahd1	2240472789	2240474261	17	4.38e-28	cis	FALSE	LD_Chr_17_2240361950_2241076094	intron_variant	MODIFIER	NA
rs33773053	2241050588	17	Fahd1	2240472789	2240474261	17	4.38e-28	cis	FALSE	LD_Chr_17_2240361950_2241076094	intron_variant	MODIFIER	NA
rs33776874	2241112258	17	Fahd1	2240472789	2240474261	17	4.38e-28	cis	FALSE	LD_Chr_17_2241083219_2241170982	downstream_gene_variant	MODIFIER	NA
rs33776091	2241112847	17	Fahd1	2240472789	2240474261	17	4.38e-28	cis	FALSE	LD_Chr_17_2241083219_2241170982	downstream_gene_variant	MODIFIER	NA
rs33701379	2241154189	17	Fahd1	2240472789	2240474261	17	4.38e-28	cis	FALSE	LD_Chr_17_2241083219_2241170982	downstream_gene_variant	MODIFIER	NA
rs33139292	2241156857	17	Fahd1	2240472789	2240474261	17	4.38e-28	cis	FALSE	LD_Chr_17_2241083219_2241170982	downstream_gene_variant	MODIFIER	NA
rs33650242	2241167791	17	Fahd1	2240472789	2240474261	17	4.38e-28	cis	FALSE	LD_Chr_17_2241083219_2241170982	upstream_gene_variant	MODIFIER	NA
rs33116487	2241167920	17	Fahd1	2240472789	2240474261	17	4.38e-28	cis	FALSE	LD_Chr_17_2241083219_2241170982	downstream_gene_variant	MODIFIER	NA
rs33353192	2241170982	17	Fahd1	2240472789	2240474261	17	4.38e-28	cis	FALSE	NA	downstream_gene_variant	MODIFIER	NA
rs3691188	2241096093	17	Fahd1	2240472789	2240474261	17	4.38e-28	cis	FALSE	LD_Chr_17_2241083219_2241170982	synonymous_variant	LOW	NA
rs8242841	171061145	1	Mpz	171150711	171161130	1	4.43e-28	cis	FALSE	LD_Chr_1_171057436_171191690	upstream_gene_variant	MODIFIER	+
rs13475987	93403982	1	D2hgdh	93824909	93852348	1	4.85e-28	cis	FALSE	LD_Chr_1_93106085_93526021	3_prime_UTR_variant	MODIFIER	NA
rs33153386	2241083219	17	Fahd1	2240472789	2240474261	17	5.37e-28	cis	FALSE	NA	non_coding_transcript_variant	MODIFIER	NA
rs6281667	2240821008	17	Fahd1	2240472789	2240474261	17	5.37e-28	cis	FALSE	LD_Chr_17_2240361950_2241076094	intron_variant	MODIFIER	NA
rs4224870	676684059	4	Aldh4a1	677247741	677274565	4	5.41e-28	cis	FALSE	LD_Chr_4_676629220_677256778	downstream_gene_variant	MODIFIER	NA
rs27642503	677376511	4	Aldh4a1	677247741	677274565	4	5.61e-28	cis	FALSE	LD_Chr_4_677313154_677590848	intron_variant	MODIFIER	NA
rs3695314	171794289	1	Mpz	171150711	171161130	1	5.71e-28	cis	FALSE	LD_Chr_1_171438247_172381513	non_coding_transcript_exon_variant	MODIFIER	+
rs31670739	2095420799	15	Mpst	2091778860	2091786457	15	6.01e-28	cis	FALSE	LD_Chr_15_2094901717_2095513963	upstream_gene_variant	MODIFIER	NA
rs27584027	676926848	4	Aldh4a1	677247741	677274565	4	6.16e-28	cis	FALSE	LD_Chr_4_676629220_677256778	intron_variant	MODIFIER	NA
rs27562109	676230678	4	Aldh4a1	677247741	677274565	4	6.16e-28	cis	FALSE	LD_Chr_4_676163577_676576704	NMD_transcript_variant	MODIFIER	NA
rs27560352	676457211	4	Aldh4a1	677247741	677274565	4	6.16e-28	cis	FALSE	LD_Chr_4_676163577_676576704	upstream_gene_variant	MODIFIER	NA
rs3153902	2240649643	17	Fahd1	2240472789	2240474261	17	6.2e-28	cis	FALSE	LD_Chr_17_2240361950_2241076094	intron_variant	MODIFIER	NA
rs31673254	2095444562	15	Mpst	2091778860	2091786457	15	6.53e-28	cis	FALSE	LD_Chr_15_2094901717_2095513963	intron_variant	MODIFIER	NA
rs31674346	2095478662	15	Mpst	2091778860	2091786457	15	6.53e-28	cis	FALSE	LD_Chr_15_2094901717_2095513963	intron_variant	MODIFIER	NA
rs31983560	2095325412	15	Mpst	2091778860	2091786457	15	6.53e-28	cis	FALSE	LD_Chr_15_2094901717_2095513963	non_coding_transcript_variant	MODIFIER	NA
rs32384785	2095331628	15	Mpst	2091778860	2091786457	15	6.53e-28	cis	FALSE	LD_Chr_15_2094901717_2095513963	intron_variant	MODIFIER	NA
rs32183187	2095092574	15	Mpst	2091778860	2091786457	15	6.53e-28	cis	FALSE	LD_Chr_15_2094901717_2095513963	intron_variant	MODIFIER	NA
rs45766871	2095111381	15	Mpst	2091778860	2091786457	15	6.53e-28	cis	FALSE	LD_Chr_15_2094901717_2095513963	intron_variant	MODIFIER	NA
rs31665077	2095362519	15	Mpst	2091778860	2091786457	15	6.53e-28	cis	FALSE	LD_Chr_15_2094901717_2095513963	downstream_gene_variant	MODIFIER	NA
rs31919174	2095115956	15	Mpst	2091778860	2091786457	15	6.53e-28	cis	FALSE	LD_Chr_15_2094901717_2095513963	intron_variant	MODIFIER	NA
rs33779422	2240696218	17	Fahd1	2240472789	2240474261	17	7.45e-28	cis	FALSE	LD_Chr_17_2240361950_2241076094	non_coding_transcript_variant	MODIFIER	NA
rs27613351	677241179	4	Aldh4a1	677247741	677274565	4	7.88e-28	cis	FALSE	LD_Chr_4_676629220_677256778	intron_variant	MODIFIER	NA
rs27613265	677256778	4	Aldh4a1	677247741	677274565	4	7.88e-28	cis	TRUE	NA	intron_variant	MODIFIER	NA
rs27595308	677284976	4	Aldh4a1	677247741	677274565	4	7.88e-28	cis	FALSE	LD_Chr_4_677278350_677308950	synonymous_variant	LOW	NA
rs33249940	2240158789	17	Fahd1	2240472789	2240474261	17	8.35e-28	cis	FALSE	LD_Chr_17_2240065603_2240357262	non_coding_transcript_variant	MODIFIER	NA
rs51211593	2240429335	17	Fahd1	2240472789	2240474261	17	8.35e-28	cis	FALSE	LD_Chr_17_2240361950_2241076094	NMD_transcript_variant	MODIFIER	NA
rs51461702	2239819109	17	Fahd1	2240472789	2240474261	17	8.35e-28	cis	FALSE	LD_Chr_17_2239582522_2239921491	intron_variant	MODIFIER	NA
rs31499761	171849483	1	Mpz	171150711	171161130	1	8.7e-28	cis	FALSE	LD_Chr_1_171438247_172381513	non_coding_transcript_variant	MODIFIER	+
rs31552666	171387257	1	Mpz	171150711	171161130	1	8.7e-28	cis	FALSE	LD_Chr_1_171342027_171397409	upstream_gene_variant	MODIFIER	+
rs31549266	171318820	1	Mpz	171150711	171161130	1	8.7e-28	cis	FALSE	LD_Chr_1_171285646_171334625	downstream_gene_variant	MODIFIER	+
rs31413830	171438247	1	Mpz	171150711	171161130	1	8.7e-28	cis	FALSE	NA	non_coding_transcript_variant	MODIFIER	+
rs13464421	172194866	1	Mpz	171150711	171161130	1	8.7e-28	cis	FALSE	LD_Chr_1_171438247_172381513	3_prime_UTR_variant	MODIFIER	+
rs27544532	676515908	4	Aldh4a1	677247741	677274565	4	1.2e-27	cis	FALSE	LD_Chr_4_676163577_676576704	downstream_gene_variant	MODIFIER	NA
rs31669386	2095368052	15	Mpst	2091778860	2091786457	15	1.4e-27	cis	FALSE	LD_Chr_15_2094901717_2095513963	NMD_transcript_variant	MODIFIER	NA
rs32388209	172067996	1	Mpz	171150711	171161130	1	1.45e-27	cis	FALSE	LD_Chr_1_171438247_172381513	non_coding_transcript_exon_variant	MODIFIER	+
rs49324031	171095442	1	Mpz	171150711	171161130	1	1.82e-27	cis	FALSE	LD_Chr_1_171057436_171191690	intergenic_variant	MODIFIER	+
rs31608490	2093709413	15	Mpst	2091778860	2091786457	15	1.86e-27	cis	FALSE	LD_Chr_15_2093520056_2094599319	NMD_transcript_variant	MODIFIER	NA
rs37733852	2093287130	15	Mpst	2091778860	2091786457	15	1.87e-27	cis	FALSE	LD_Chr_15_2093113077_2093335325	downstream_gene_variant	MODIFIER	NA
rs36397331	2093291337	15	Mpst	2091778860	2091786457	15	1.87e-27	cis	FALSE	LD_Chr_15_2093113077_2093335325	missense_variant	MODERATE	NA
rs3700059	2093381068	15	Mpst	2091778860	2091786457	15	1.87e-27	cis	FALSE	NA	non_coding_transcript_variant	MODIFIER	NA
rs36675064	2093167603	15	Mpst	2091778860	2091786457	15	1.87e-27	cis	FALSE	LD_Chr_15_2093113077_2093335325	intron_variant	MODIFIER	NA
rs31671112	2093189079	15	Mpst	2091778860	2091786457	15	1.87e-27	cis	FALSE	LD_Chr_15_2093113077_2093335325	intron_variant	MODIFIER	NA
rs38836639	2093251800	15	Mpst	2091778860	2091786457	15	1.87e-27	cis	FALSE	LD_Chr_15_2093113077_2093335325	downstream_gene_variant	MODIFIER	NA
rs37053009	2093266187	15	Mpst	2091778860	2091786457	15	1.87e-27	cis	FALSE	LD_Chr_15_2093113077_2093335325	intron_variant	MODIFIER	NA
rs38205356	2093266312	15	Mpst	2091778860	2091786457	15	1.87e-27	cis	FALSE	LD_Chr_15_2093113077_2093335325	upstream_gene_variant	MODIFIER	NA
rs37279791	2093273460	15	Mpst	2091778860	2091786457	15	1.87e-27	cis	FALSE	LD_Chr_15_2093113077_2093335325	non_coding_transcript_variant	MODIFIER	NA
rs36582805	2093276810	15	Mpst	2091778860	2091786457	15	1.87e-27	cis	FALSE	LD_Chr_15_2093113077_2093335325	non_coding_transcript_variant	MODIFIER	NA
rs32447370	2093202609	15	Mpst	2091778860	2091786457	15	1.87e-27	cis	FALSE	LD_Chr_15_2093113077_2093335325	non_coding_transcript_exon_variant	MODIFIER	NA
rs32383159	2093211641	15	Mpst	2091778860	2091786457	15	1.87e-27	cis	FALSE	LD_Chr_15_2093113077_2093335325	upstream_gene_variant	MODIFIER	NA
rs6180893	2093230029	15	Mpst	2091778860	2091786457	15	1.87e-27	cis	FALSE	LD_Chr_15_2093113077_2093335325	intergenic_variant	MODIFIER	NA
rs32231527	2093248292	15	Mpst	2091778860	2091786457	15	1.87e-27	cis	FALSE	LD_Chr_15_2093113077_2093335325	non_coding_transcript_exon_variant	MODIFIER	NA
rs32466754	2093454786	15	Mpst	2091778860	2091786457	15	1.87e-27	cis	FALSE	NA	non_coding_transcript_variant	MODIFIER	NA
rs32398963	2093580820	15	Mpst	2091778860	2091786457	15	1.92e-27	cis	FALSE	LD_Chr_15_2093520056_2094599319	intron_variant	MODIFIER	NA
rs32307386	2093584101	15	Mpst	2091778860	2091786457	15	1.92e-27	cis	FALSE	LD_Chr_15_2093520056_2094599319	synonymous_variant	LOW	NA
rs48148497	2093586235	15	Mpst	2091778860	2091786457	15	1.92e-27	cis	FALSE	LD_Chr_15_2093520056_2094599319	3_prime_UTR_variant	MODIFIER	NA
rs33229648	2240152719	17	Fahd1	2240472789	2240474261	17	2e-27	cis	FALSE	LD_Chr_17_2240065603_2240357262	upstream_gene_variant	MODIFIER	NA
rs27562904	676711065	4	Aldh4a1	677247741	677274565	4	2.14e-27	cis	FALSE	LD_Chr_4_676629220_677256778	intron_variant	MODIFIER	NA
rs29783187	1861205345	13	Cmya5	1861089274	1861193285	13	2.26e-27	cis	FALSE	LD_Chr_13_1860757122_1861913824	intron_variant	MODIFIER	NA
rs31665933	2095364549	15	Mpst	2091778860	2091786457	15	2.28e-27	cis	FALSE	LD_Chr_15_2094901717_2095513963	downstream_gene_variant	MODIFIER	NA
rs31664302	2095268866	15	Mpst	2091778860	2091786457	15	2.29e-27	cis	FALSE	LD_Chr_15_2094901717_2095513963	downstream_gene_variant	MODIFIER	NA
rs3720248	1861786812	13	Cmya5	1861089274	1861193285	13	2.37e-27	cis	FALSE	LD_Chr_13_1860757122_1861913824	intron_variant	MODIFIER	NA
rs29527633	1861110226	13	Cmya5	1861089274	1861193285	13	2.37e-27	cis	TRUE	LD_Chr_13_1860757122_1861913824	intron_variant	MODIFIER	NA
rs27575018	676374866	4	Aldh4a1	677247741	677274565	4	2.44e-27	cis	FALSE	LD_Chr_4_676163577_676576704	downstream_gene_variant	MODIFIER	NA
rs32535368	2095377322	15	Mpst	2091778860	2091786457	15	2.65e-27	cis	FALSE	LD_Chr_15_2094901717_2095513963	intron_variant	MODIFIER	NA
rs51073960	2240401672	17	Fahd1	2240472789	2240474261	17	3.12e-27	cis	FALSE	LD_Chr_17_2240361950_2241076094	upstream_gene_variant	MODIFIER	NA
rs47656007	2239806915	17	Fahd1	2240472789	2240474261	17	3.3e-27	cis	FALSE	LD_Chr_17_2239582522_2239921491	intron_variant	MODIFIER	NA
rs3718952	677675099	4	Aldh4a1	677247741	677274565	4	3.36e-27	cis	FALSE	LD_Chr_4_677652450_678206916	intron_variant	MODIFIER	NA
rs33781709	2240653165	17	Fahd1	2240472789	2240474261	17	3.45e-27	cis	FALSE	LD_Chr_17_2240361950_2241076094	upstream_gene_variant	MODIFIER	NA
rs33458783	2240507855	17	Fahd1	2240472789	2240474261	17	3.45e-27	cis	FALSE	LD_Chr_17_2240361950_2241076094	intron_variant	MODIFIER	NA
rs29778275	1860789903	13	Cmya5	1861089274	1861193285	13	3.53e-27	cis	FALSE	LD_Chr_13_1860757122_1861913824	intergenic_variant	MODIFIER	NA
rs46758627	2245535320	17	Glo1	2246216763	2246236556	17	3.63e-27	cis	FALSE	NA	NMD_transcript_variant	MODIFIER	NA
rs31708754	2094922679	15	Mpst	2091778860	2091786457	15	3.9e-27	cis	FALSE	LD_Chr_15_2094901717_2095513963	intergenic_variant	MODIFIER	NA
rs8242437	171238494	1	Mpz	171150711	171161130	1	4.03e-27	cis	FALSE	LD_Chr_1_171234692_171269985	non_coding_transcript_variant	MODIFIER	+
rs27552762	677081476	4	Aldh4a1	677247741	677274565	4	4.12e-27	cis	FALSE	LD_Chr_4_676629220_677256778	intron_variant	MODIFIER	NA
rs33484152	2240802027	17	Fahd1	2240472789	2240474261	17	4.35e-27	cis	FALSE	LD_Chr_17_2240361950_2241076094	upstream_gene_variant	MODIFIER	NA
rs30462815	171258252	1	Mpz	171150711	171161130	1	4.92e-27	cis	FALSE	LD_Chr_1_171234692_171269985	intron_variant	MODIFIER	+
rs13482925	2240716709	17	Fahd1	2240472789	2240474261	17	5.19e-27	cis	FALSE	LD_Chr_17_2240361950_2241076094	downstream_gene_variant	MODIFIER	NA
rs6319057	2240712122	17	Fahd1	2240472789	2240474261	17	5.19e-27	cis	FALSE	LD_Chr_17_2240361950_2241076094	intron_variant	MODIFIER	NA
rs8256992	2240993828	17	Fahd1	2240472789	2240474261	17	5.19e-27	cis	FALSE	LD_Chr_17_2240361950_2241076094	downstream_gene_variant	MODIFIER	NA
rs33267585	2240998397	17	Fahd1	2240472789	2240474261	17	5.19e-27	cis	FALSE	LD_Chr_17_2240361950_2241076094	3_prime_UTR_variant	MODIFIER	NA
rs33287058	2240629854	17	Fahd1	2240472789	2240474261	17	5.19e-27	cis	FALSE	LD_Chr_17_2240361950_2241076094	intron_variant	MODIFIER	NA
rs33622432	2242047278	17	Fahd1	2240472789	2240474261	17	5.19e-27	cis	FALSE	NA	intron_variant	MODIFIER	NA
rs33183616	2242091850	17	Fahd1	2240472789	2240474261	17	5.19e-27	cis	FALSE	LD_Chr_17_2242066867_2242160518	non_coding_transcript_exon_variant	MODIFIER	NA
rs33134557	2240685846	17	Fahd1	2240472789	2240474261	17	5.19e-27	cis	FALSE	LD_Chr_17_2240361950_2241076094	intron_variant	MODIFIER	NA
rs33783914	2240707340	17	Fahd1	2240472789	2240474261	17	5.19e-27	cis	FALSE	LD_Chr_17_2240361950_2241076094	non_coding_transcript_variant	MODIFIER	NA
rs6319102	2240712149	17	Fahd1	2240472789	2240474261	17	5.19e-27	cis	FALSE	LD_Chr_17_2240361950_2241076094	non_coding_transcript_variant	MODIFIER	NA
rs33431590	2240695220	17	Fahd1	2240472789	2240474261	17	5.19e-27	cis	FALSE	LD_Chr_17_2240361950_2241076094	non_coding_transcript_variant	MODIFIER	NA
rs33781712	2240652441	17	Fahd1	2240472789	2240474261	17	5.19e-27	cis	FALSE	LD_Chr_17_2240361950_2241076094	intron_variant	MODIFIER	NA
rs33779307	2240723310	17	Fahd1	2240472789	2240474261	17	5.19e-27	cis	FALSE	LD_Chr_17_2240361950_2241076094	downstream_gene_variant	MODIFIER	NA
rs33311049	2240825246	17	Fahd1	2240472789	2240474261	17	5.19e-27	cis	FALSE	LD_Chr_17_2240361950_2241076094	intron_variant	MODIFIER	NA
rs33561190	2240853858	17	Fahd1	2240472789	2240474261	17	5.19e-27	cis	FALSE	LD_Chr_17_2240361950_2241076094	intron_variant	MODIFIER	NA
rs13482917	2240855154	17	Fahd1	2240472789	2240474261	17	5.19e-27	cis	FALSE	LD_Chr_17_2240361950_2241076094	downstream_gene_variant	MODIFIER	NA
rs33268106	2241270515	17	Fahd1	2240472789	2240474261	17	5.19e-27	cis	FALSE	LD_Chr_17_2241173419_2241607776	non_coding_transcript_exon_variant	MODIFIER	NA
rs49652834	2241606835	17	Fahd1	2240472789	2240474261	17	5.19e-27	cis	FALSE	LD_Chr_17_2241173419_2241607776	NMD_transcript_variant	MODIFIER	NA
rs33355207	2241664073	17	Fahd1	2240472789	2240474261	17	5.19e-27	cis	FALSE	NA	non_coding_transcript_variant	MODIFIER	NA
rs29536718	2241813747	17	Fahd1	2240472789	2240474261	17	5.19e-27	cis	FALSE	LD_Chr_17_2241690577_2241836408	intron_variant	MODIFIER	NA
rs33427439	2242010666	17	Fahd1	2240472789	2240474261	17	5.19e-27	cis	FALSE	LD_Chr_17_2241846929_2242047278	intergenic_variant	MODIFIER	NA
rs46666824	2242011573	17	Fahd1	2240472789	2240474261	17	5.19e-27	cis	FALSE	LD_Chr_17_2241846929_2242047278	intergenic_variant	MODIFIER	NA
rs33096933	2241977307	17	Fahd1	2240472789	2240474261	17	5.19e-27	cis	FALSE	LD_Chr_17_2241846929_2242047278	intergenic_variant	MODIFIER	NA
rs29521922	2242145703	17	Fahd1	2240472789	2240474261	17	5.19e-27	cis	FALSE	LD_Chr_17_2242066867_2242160518	downstream_gene_variant	MODIFIER	NA
rs33409440	2242148651	17	Fahd1	2240472789	2240474261	17	5.19e-27	cis	FALSE	LD_Chr_17_2242066867_2242160518	intron_variant	MODIFIER	NA
rs50044622	2242079998	17	Fahd1	2240472789	2240474261	17	5.19e-27	cis	FALSE	LD_Chr_17_2242066867_2242160518	non_coding_transcript_variant	MODIFIER	NA
rs33639229	2242105521	17	Fahd1	2240472789	2240474261	17	5.19e-27	cis	FALSE	LD_Chr_17_2242066867_2242160518	non_coding_transcript_variant	MODIFIER	NA
rs33622777	2240152774	17	Fahd1	2240472789	2240474261	17	5.3e-27	cis	FALSE	LD_Chr_17_2240065603_2240357262	upstream_gene_variant	MODIFIER	NA
rs27584024	676927063	4	Aldh4a1	677247741	677274565	4	6.07e-27	cis	FALSE	LD_Chr_4_676629220_677256778	intron_variant	MODIFIER	NA
rs46698904	2239845838	17	Fahd1	2240472789	2240474261	17	6.51e-27	cis	FALSE	LD_Chr_17_2239582522_2239921491	upstream_gene_variant	MODIFIER	NA
rs27613080	677278350	4	Aldh4a1	677247741	677274565	4	6.93e-27	cis	FALSE	NA	downstream_gene_variant	MODIFIER	NA
rs27591956	677635976	4	Aldh4a1	677247741	677274565	4	6.93e-27	cis	FALSE	LD_Chr_4_677593683_677641452	intergenic_variant	MODIFIER	NA
rs33615078	2240874275	17	Fahd1	2240472789	2240474261	17	7.54e-27	cis	FALSE	LD_Chr_17_2240361950_2241076094	intron_variant	MODIFIER	NA
rs13482927	2241279049	17	Fahd1	2240472789	2240474261	17	8.02e-27	cis	FALSE	LD_Chr_17_2241173419_2241607776	NMD_transcript_variant	MODIFIER	NA
rs31536084	171576905	1	Mpz	171150711	171161130	1	8.53e-27	cis	FALSE	LD_Chr_1_171438247_172381513	intron_variant	MODIFIER	+
rs32327473	2093279394	15	Mpst	2091778860	2091786457	15	9.76e-27	cis	FALSE	LD_Chr_15_2093113077_2093335325	missense_variant	MODERATE	NA
rs29539034	2239688447	17	Fahd1	2240472789	2240474261	17	1.04e-26	cis	FALSE	LD_Chr_17_2239582522_2239921491	intron_variant	MODIFIER	NA
rs33443470	2241256506	17	Fahd1	2240472789	2240474261	17	1.07e-26	cis	FALSE	LD_Chr_17_2241173419_2241607776	intron_variant	MODIFIER	NA
rs49781834	2241254843	17	Fahd1	2240472789	2240474261	17	1.07e-26	cis	FALSE	LD_Chr_17_2241173419_2241607776	downstream_gene_variant	MODIFIER	NA
rs29529422	2241266997	17	Fahd1	2240472789	2240474261	17	1.07e-26	cis	FALSE	LD_Chr_17_2241173419_2241607776	intron_variant	MODIFIER	NA
rs33589982	2245111060	17	Glo1	2246216763	2246236556	17	1.17e-26	cis	FALSE	NA	upstream_gene_variant	MODIFIER	NA
rs51926960	2240232995	17	Fahd1	2240472789	2240474261	17	1.22e-26	cis	FALSE	LD_Chr_17_2240065603_2240357262	upstream_gene_variant	MODIFIER	NA
rs31188514	172098237	1	Mpz	171150711	171161130	1	1.24e-26	cis	FALSE	LD_Chr_1_171438247_172381513	intron_variant	MODIFIER	+
rs33626149	2240300173	17	Fahd1	2240472789	2240474261	17	1.33e-26	cis	FALSE	LD_Chr_17_2240065603_2240357262	upstream_gene_variant	MODIFIER	NA
rs33221755	2240302628	17	Fahd1	2240472789	2240474261	17	1.33e-26	cis	FALSE	LD_Chr_17_2240065603_2240357262	intron_variant	MODIFIER	NA
rs33700139	2240297478	17	Fahd1	2240472789	2240474261	17	1.33e-26	cis	FALSE	LD_Chr_17_2240065603_2240357262	intron_variant	MODIFIER	NA
rs3699610	676248531	4	Aldh4a1	677247741	677274565	4	1.38e-26	cis	FALSE	LD_Chr_4_676163577_676576704	NMD_transcript_variant	MODIFIER	NA
rs31529714	171849583	1	Mpz	171150711	171161130	1	1.43e-26	cis	FALSE	LD_Chr_1_171438247_172381513	intron_variant	MODIFIER	+
rs31530725	171847215	1	Mpz	171150711	171161130	1	1.43e-26	cis	FALSE	LD_Chr_1_171438247_172381513	intron_variant	MODIFIER	+
rs33099262	2241161011	17	Fahd1	2240472789	2240474261	17	1.5e-26	cis	FALSE	LD_Chr_17_2241083219_2241170982	non_coding_transcript_exon_variant	MODIFIER	NA
rs36887189	2093343429	15	Mpst	2091778860	2091786457	15	1.62e-26	cis	FALSE	LD_Chr_15_2093342394_2093372945	5_prime_UTR_variant	MODIFIER	NA
rs32304436	2093356290	15	Mpst	2091778860	2091786457	15	1.62e-26	cis	FALSE	LD_Chr_15_2093342394_2093372945	intergenic_variant	MODIFIER	NA
rs36687838	2093357194	15	Mpst	2091778860	2091786457	15	1.62e-26	cis	FALSE	LD_Chr_15_2093342394_2093372945	intergenic_variant	MODIFIER	NA
rs32197832	2093113077	15	Mpst	2091778860	2091786457	15	1.62e-26	cis	FALSE	NA	intron_variant	MODIFIER	NA
rs36385834	2093335325	15	Mpst	2091778860	2091786457	15	1.62e-26	cis	FALSE	NA	intron_variant	MODIFIER	NA
rs38861363	2093369404	15	Mpst	2091778860	2091786457	15	1.62e-26	cis	FALSE	LD_Chr_15_2093342394_2093372945	downstream_gene_variant	MODIFIER	NA
rs31928577	2093202395	15	Mpst	2091778860	2091786457	15	1.62e-26	cis	FALSE	LD_Chr_15_2093113077_2093335325	intron_variant	MODIFIER	NA
rs36700406	2093299488	15	Mpst	2091778860	2091786457	15	1.67e-26	cis	FALSE	LD_Chr_15_2093113077_2093335325	intron_variant	MODIFIER	NA
rs31656530	2094475087	15	Mpst	2091778860	2091786457	15	1.79e-26	cis	FALSE	LD_Chr_15_2093520056_2094599319	intron_variant	MODIFIER	NA
rs31642927	2094499413	15	Mpst	2091778860	2091786457	15	1.79e-26	cis	FALSE	LD_Chr_15_2093520056_2094599319	non_coding_transcript_variant	MODIFIER	NA
rs3691091	171766529	1	Mpz	171150711	171161130	1	2.08e-26	cis	FALSE	LD_Chr_1_171438247_172381513	upstream_gene_variant	MODIFIER	+
rs31536245	171490114	1	Mpz	171150711	171161130	1	2.28e-26	cis	FALSE	LD_Chr_1_171438247_172381513	intergenic_variant	MODIFIER	+
rs47395682	2240123566	17	Fahd1	2240472789	2240474261	17	2.47e-26	cis	FALSE	LD_Chr_17_2240065603_2240357262	upstream_gene_variant	MODIFIER	NA
rs31863648	2093581156	15	Mpst	2091778860	2091786457	15	2.64e-26	cis	FALSE	LD_Chr_15_2093520056_2094599319	intron_variant	MODIFIER	NA
rs48685860	93790482	1	D2hgdh	93824909	93852348	1	2.71e-26	cis	FALSE	LD_Chr_1_93692658_94038305	downstream_gene_variant	MODIFIER	NA
rs33627913	2241066532	17	Fahd1	2240472789	2240474261	17	2.81e-26	cis	FALSE	LD_Chr_17_2240361950_2241076094	intergenic_variant	MODIFIER	NA
rs8258245	171225406	1	Mpz	171150711	171161130	1	3.22e-26	cis	FALSE	NA	downstream_gene_variant	MODIFIER	+
rs33098486	2240464028	17	Fahd1	2240472789	2240474261	17	3.3e-26	cis	FALSE	LD_Chr_17_2240361950_2241076094	upstream_gene_variant	MODIFIER	NA
rs48308765	2242082081	17	Fahd1	2240472789	2240474261	17	3.32e-26	cis	FALSE	LD_Chr_17_2242066867_2242160518	non_coding_transcript_variant	MODIFIER	NA
rs33675256	2244960593	17	Glo1	2246216763	2246236556	17	3.44e-26	cis	FALSE	LD_Chr_17_2244940772_2245055377	intron_variant	MODIFIER	NA
rs48765552	2245267291	17	Glo1	2246216763	2246236556	17	3.44e-26	cis	FALSE	NA	downstream_gene_variant	MODIFIER	NA
rs33103360	2245404427	17	Glo1	2246216763	2246236556	17	3.44e-26	cis	FALSE	LD_Chr_17_2245338581_2245416437	intergenic_variant	MODIFIER	NA
rs33091300	2245471331	17	Glo1	2246216763	2246236556	17	3.44e-26	cis	FALSE	NA	intron_variant	MODIFIER	NA
rs33672660	2245223502	17	Glo1	2246216763	2246236556	17	3.44e-26	cis	FALSE	LD_Chr_17_2245177499_2245257886	NMD_transcript_variant	MODIFIER	NA
rs45632945	2244998446	17	Glo1	2246216763	2246236556	17	3.44e-26	cis	FALSE	LD_Chr_17_2244940772_2245055377	upstream_gene_variant	MODIFIER	NA
rs50382028	2244994005	17	Glo1	2246216763	2246236556	17	3.44e-26	cis	FALSE	LD_Chr_17_2244940772_2245055377	upstream_gene_variant	MODIFIER	NA
rs52353083	2245003701	17	Glo1	2246216763	2246236556	17	3.44e-26	cis	FALSE	LD_Chr_17_2244940772_2245055377	downstream_gene_variant	MODIFIER	NA
rs33195449	2245008930	17	Glo1	2246216763	2246236556	17	3.44e-26	cis	FALSE	LD_Chr_17_2244940772_2245055377	intergenic_variant	MODIFIER	NA
rs31667378	2095353118	15	Mpst	2091778860	2091786457	15	3.48e-26	cis	FALSE	LD_Chr_15_2094901717_2095513963	missense_variant	MODERATE	NA
rs31061689	2445893584	19	Sec31b	2445830764	2445859671	19	3.52e-26	cis	FALSE	LD_Chr_19_2445693208_2446246532	downstream_gene_variant	MODIFIER	NA
rs30945193	2445894628	19	Sec31b	2445830764	2445859671	19	3.52e-26	cis	FALSE	LD_Chr_19_2445693208_2446246532	downstream_gene_variant	MODIFIER	NA
rs37596836	2445894775	19	Sec31b	2445830764	2445859671	19	3.52e-26	cis	FALSE	LD_Chr_19_2445693208_2446246532	downstream_gene_variant	MODIFIER	NA
rs37727886	2445898818	19	Sec31b	2445830764	2445859671	19	3.52e-26	cis	FALSE	LD_Chr_19_2445693208_2446246532	intergenic_variant	MODIFIER	NA
rs30997056	2445893846	19	Sec31b	2445830764	2445859671	19	3.52e-26	cis	FALSE	LD_Chr_19_2445693208_2446246532	downstream_gene_variant	MODIFIER	NA
rs27829136	597475638	4	Alad	600134044	600144793	4	3.57e-26	cis	FALSE	LD_Chr_4_597420328_600821767	intron_variant	MODIFIER	NA
rs27829125	597478939	4	Alad	600134044	600144793	4	3.57e-26	cis	FALSE	LD_Chr_4_597420328_600821767	intron_variant	MODIFIER	NA
rs27829124	597478998	4	Alad	600134044	600144793	4	3.57e-26	cis	FALSE	LD_Chr_4_597420328_600821767	intron_variant	MODIFIER	NA
rs27829123	597479017	4	Alad	600134044	600144793	4	3.57e-26	cis	FALSE	LD_Chr_4_597420328_600821767	intron_variant	MODIFIER	NA
rs49478270	2298771504	17	Cox7a2l	2299125815	2299141227	17	3.6e-26	cis	FALSE	LD_Chr_17_2298695064_2298901663	intergenic_variant	MODIFIER	NA
rs48454754	2298782135	17	Cox7a2l	2299125815	2299141227	17	3.6e-26	cis	FALSE	LD_Chr_17_2298695064_2298901663	intergenic_variant	MODIFIER	NA
rs29500459	2298800534	17	Cox7a2l	2299125815	2299141227	17	3.6e-26	cis	FALSE	LD_Chr_17_2298695064_2298901663	intergenic_variant	MODIFIER	NA
rs49505637	2298552303	17	Cox7a2l	2299125815	2299141227	17	3.6e-26	cis	FALSE	LD_Chr_17_2298183073_2298694324	intergenic_variant	MODIFIER	NA
rs48188687	2298528127	17	Cox7a2l	2299125815	2299141227	17	3.6e-26	cis	FALSE	LD_Chr_17_2298183073_2298694324	intergenic_variant	MODIFIER	NA
rs32173434	2093138157	15	Mpst	2091778860	2091786457	15	3.7e-26	cis	FALSE	LD_Chr_15_2093113077_2093335325	intron_variant	MODIFIER	NA
rs3724848	172046069	1	Mpz	171150711	171161130	1	3.75e-26	cis	FALSE	LD_Chr_1_171438247_172381513	intergenic_variant	MODIFIER	+
rs31577632	172113899	1	Mpz	171150711	171161130	1	3.75e-26	cis	FALSE	LD_Chr_1_171438247_172381513	downstream_gene_variant	MODIFIER	+
rs32469547	2094463405	15	Mpst	2091778860	2091786457	15	3.84e-26	cis	FALSE	LD_Chr_15_2093520056_2094599319	intron_variant	MODIFIER	NA
rs31574285	2094485551	15	Mpst	2091778860	2091786457	15	3.86e-26	cis	FALSE	LD_Chr_15_2093520056_2094599319	intron_variant	MODIFIER	NA
rs32010344	2094543996	15	Mpst	2091778860	2091786457	15	3.86e-26	cis	FALSE	LD_Chr_15_2093520056_2094599319	non_coding_transcript_variant	MODIFIER	NA
rs32121943	2094576529	15	Mpst	2091778860	2091786457	15	3.86e-26	cis	FALSE	LD_Chr_15_2093520056_2094599319	downstream_gene_variant	MODIFIER	NA
rs32160888	2094563691	15	Mpst	2091778860	2091786457	15	3.86e-26	cis	FALSE	LD_Chr_15_2093520056_2094599319	upstream_gene_variant	MODIFIER	NA
rs46363121	2240152698	17	Fahd1	2240472789	2240474261	17	4.36e-26	cis	FALSE	LD_Chr_17_2240065603_2240357262	downstream_gene_variant	MODIFIER	NA
rs33118959	2241017113	17	Fahd1	2240472789	2240474261	17	5.3e-26	cis	FALSE	LD_Chr_17_2240361950_2241076094	intron_variant	MODIFIER	NA
rs31664383	2095362122	15	Mpst	2091778860	2091786457	15	5.4e-26	cis	FALSE	LD_Chr_15_2094901717_2095513963	downstream_gene_variant	MODIFIER	NA
rs31667905	2095274517	15	Mpst	2091778860	2091786457	15	5.4e-26	cis	FALSE	LD_Chr_15_2094901717_2095513963	non_coding_transcript_variant	MODIFIER	NA
rs31665789	2095285477	15	Mpst	2091778860	2091786457	15	5.4e-26	cis	FALSE	LD_Chr_15_2094901717_2095513963	downstream_gene_variant	MODIFIER	NA
rs31662704	2095293911	15	Mpst	2091778860	2091786457	15	5.4e-26	cis	FALSE	LD_Chr_15_2094901717_2095513963	non_coding_transcript_variant	MODIFIER	NA
rs31665557	2095229417	15	Mpst	2091778860	2091786457	15	5.4e-26	cis	FALSE	LD_Chr_15_2094901717_2095513963	intron_variant	MODIFIER	NA
rs31876506	2095092755	15	Mpst	2091778860	2091786457	15	5.4e-26	cis	FALSE	LD_Chr_15_2094901717_2095513963	intron_variant	MODIFIER	NA
rs32484315	2095083376	15	Mpst	2091778860	2091786457	15	5.4e-26	cis	FALSE	LD_Chr_15_2094901717_2095513963	downstream_gene_variant	MODIFIER	NA
rs32081346	2095093361	15	Mpst	2091778860	2091786457	15	5.4e-26	cis	FALSE	LD_Chr_15_2094901717_2095513963	intron_variant	MODIFIER	NA
rs31979370	2095275660	15	Mpst	2091778860	2091786457	15	5.4e-26	cis	FALSE	LD_Chr_15_2094901717_2095513963	non_coding_transcript_variant	MODIFIER	NA
rs31670694	2095412570	15	Mpst	2091778860	2091786457	15	5.4e-26	cis	FALSE	LD_Chr_15_2094901717_2095513963	downstream_gene_variant	MODIFIER	NA
rs31678995	2095485926	15	Mpst	2091778860	2091786457	15	5.4e-26	cis	FALSE	LD_Chr_15_2094901717_2095513963	NMD_transcript_variant	MODIFIER	NA
rs31654945	2095128384	15	Mpst	2091778860	2091786457	15	5.4e-26	cis	FALSE	LD_Chr_15_2094901717_2095513963	intron_variant	MODIFIER	NA
rs31655056	2095147091	15	Mpst	2091778860	2091786457	15	5.4e-26	cis	FALSE	LD_Chr_15_2094901717_2095513963	intron_variant	MODIFIER	NA
rs31666044	2095165073	15	Mpst	2091778860	2091786457	15	5.4e-26	cis	FALSE	LD_Chr_15_2094901717_2095513963	intron_variant	MODIFIER	NA
rs47236168	2245112788	17	Glo1	2246216763	2246236556	17	5.66e-26	cis	FALSE	NA	upstream_gene_variant	MODIFIER	NA
rs29135604	1752345017	12	Serpina3k	1752258025	1752265683	12	6.22e-26	cis	FALSE	NA	intergenic_variant	MODIFIER	NA
rs31662711	2095294163	15	Mpst	2091778860	2091786457	15	6.77e-26	cis	FALSE	LD_Chr_15_2094901717_2095513963	non_coding_transcript_variant	MODIFIER	NA
rs31529171	171664326	1	Mpz	171150711	171161130	1	6.81e-26	cis	FALSE	LD_Chr_1_171438247_172381513	intergenic_variant	MODIFIER	+
rs32510604	2094904250	15	Mpst	2091778860	2091786457	15	6.86e-26	cis	FALSE	LD_Chr_15_2094901717_2095513963	intergenic_variant	MODIFIER	NA
rs50113404	2095033318	15	Mpst	2091778860	2091786457	15	6.86e-26	cis	FALSE	LD_Chr_15_2094901717_2095513963	NA	NA	NA
rs32271160	2095074959	15	Mpst	2091778860	2091786457	15	6.86e-26	cis	FALSE	LD_Chr_15_2094901717_2095513963	downstream_gene_variant	MODIFIER	NA
rs27560356	676456780	4	Aldh4a1	677247741	677274565	4	7.66e-26	cis	FALSE	LD_Chr_4_676163577_676576704	intron_variant	MODIFIER	NA
rs33518389	2240634397	17	Fahd1	2240472789	2240474261	17	7.69e-26	cis	FALSE	LD_Chr_17_2240361950_2241076094	intron_variant	MODIFIER	NA
rs33086924	2241108936	17	Fahd1	2240472789	2240474261	17	7.77e-26	cis	FALSE	LD_Chr_17_2241083219_2241170982	downstream_gene_variant	MODIFIER	NA
rs33651526	2240633009	17	Fahd1	2240472789	2240474261	17	7.77e-26	cis	FALSE	LD_Chr_17_2240361950_2241076094	intron_variant	MODIFIER	NA
rs33706256	2241249609	17	Fahd1	2240472789	2240474261	17	7.8e-26	cis	FALSE	LD_Chr_17_2241173419_2241607776	intron_variant	MODIFIER	NA
rs30655030	172064550	1	Mpz	171150711	171161130	1	8.07e-26	cis	FALSE	LD_Chr_1_171438247_172381513	downstream_gene_variant	MODIFIER	+
rs31579922	172065370	1	Mpz	171150711	171161130	1	8.07e-26	cis	FALSE	LD_Chr_1_171438247_172381513	downstream_gene_variant	MODIFIER	+
rs36456875	2094566650	15	Mpst	2091778860	2091786457	15	8.38e-26	cis	FALSE	LD_Chr_15_2093520056_2094599319	downstream_gene_variant	MODIFIER	NA
rs30820190	171899620	1	Mpz	171150711	171161130	1	8.45e-26	cis	FALSE	LD_Chr_1_171438247_172381513	downstream_gene_variant	MODIFIER	+
rs33779366	2240672159	17	Fahd1	2240472789	2240474261	17	8.58e-26	cis	FALSE	LD_Chr_17_2240361950_2241076094	non_coding_transcript_variant	MODIFIER	NA
rs51681045	2242082778	17	Fahd1	2240472789	2240474261	17	8.58e-26	cis	FALSE	LD_Chr_17_2242066867_2242160518	non_coding_transcript_variant	MODIFIER	NA
rs31542354	171431737	1	Mpz	171150711	171161130	1	1.02e-25	cis	FALSE	LD_Chr_1_171414494_171435646	intergenic_variant	MODIFIER	+
rs30389294	1861825834	13	Cmya5	1861089274	1861193285	13	1.03e-25	cis	FALSE	LD_Chr_13_1860757122_1861913824	non_coding_transcript_variant	MODIFIER	NA
rs33554175	2245570625	17	Glo1	2246216763	2246236556	17	1.12e-25	cis	FALSE	LD_Chr_17_2245536685_2245970474	NMD_transcript_variant	MODIFIER	NA
rs46921880	2299209679	17	Cox7a2l	2299125815	2299141227	17	1.12e-25	cis	FALSE	LD_Chr_17_2298908041_2299278376	downstream_gene_variant	MODIFIER	NA
rs33637340	2240541612	17	Fahd1	2240472789	2240474261	17	1.14e-25	cis	FALSE	LD_Chr_17_2240361950_2241076094	intron_variant	MODIFIER	NA
rs48784781	2241909800	17	Fahd1	2240472789	2240474261	17	1.22e-25	cis	FALSE	LD_Chr_17_2241846929_2242047278	downstream_gene_variant	MODIFIER	NA
rs33217114	2241938540	17	Fahd1	2240472789	2240474261	17	1.22e-25	cis	FALSE	LD_Chr_17_2241846929_2242047278	downstream_gene_variant	MODIFIER	NA
rs33710459	2240902577	17	Fahd1	2240472789	2240474261	17	1.25e-25	cis	FALSE	LD_Chr_17_2240361950_2241076094	upstream_gene_variant	MODIFIER	NA
rs47936038	2241223303	17	Fahd1	2240472789	2240474261	17	1.36e-25	cis	FALSE	LD_Chr_17_2241173419_2241607776	intron_variant	MODIFIER	NA
rs37840012	2093278369	15	Mpst	2091778860	2091786457	15	1.4e-25	cis	FALSE	LD_Chr_15_2093113077_2093335325	intron_variant	MODIFIER	NA
rs31668853	2095244782	15	Mpst	2091778860	2091786457	15	1.45e-25	cis	FALSE	LD_Chr_15_2094901717_2095513963	upstream_gene_variant	MODIFIER	NA
rs49678322	2241851593	17	Fahd1	2240472789	2240474261	17	1.49e-25	cis	FALSE	LD_Chr_17_2241846929_2242047278	downstream_gene_variant	MODIFIER	NA
rs31972573	2095254349	15	Mpst	2091778860	2091786457	15	1.71e-25	cis	FALSE	LD_Chr_15_2094901717_2095513963	intron_variant	MODIFIER	NA
rs31655898	2095240690	15	Mpst	2091778860	2091786457	15	1.71e-25	cis	FALSE	LD_Chr_15_2094901717_2095513963	upstream_gene_variant	MODIFIER	NA
rs31728582	2094901717	15	Mpst	2091778860	2091786457	15	1.82e-25	cis	FALSE	NA	intergenic_variant	MODIFIER	NA
rs31700451	2094903061	15	Mpst	2091778860	2091786457	15	1.82e-25	cis	FALSE	LD_Chr_15_2094901717_2095513963	intergenic_variant	MODIFIER	NA
rs31726385	2094907198	15	Mpst	2091778860	2091786457	15	1.89e-25	cis	FALSE	LD_Chr_15_2094901717_2095513963	intergenic_variant	MODIFIER	NA
rs47708614	2241912851	17	Fahd1	2240472789	2240474261	17	1.91e-25	cis	FALSE	LD_Chr_17_2241846929_2242047278	downstream_gene_variant	MODIFIER	NA
rs33187940	2241979961	17	Fahd1	2240472789	2240474261	17	1.91e-25	cis	FALSE	LD_Chr_17_2241846929_2242047278	intergenic_variant	MODIFIER	NA
rs33052678	2241906684	17	Fahd1	2240472789	2240474261	17	1.91e-25	cis	FALSE	LD_Chr_17_2241846929_2242047278	downstream_gene_variant	MODIFIER	NA
rs33382733	2242074727	17	Fahd1	2240472789	2240474261	17	1.91e-25	cis	FALSE	LD_Chr_17_2242066867_2242160518	downstream_gene_variant	MODIFIER	NA
rs33381299	2242158847	17	Fahd1	2240472789	2240474261	17	1.91e-25	cis	FALSE	LD_Chr_17_2242066867_2242160518	intron_variant	MODIFIER	NA
rs33646325	2242158873	17	Fahd1	2240472789	2240474261	17	1.91e-25	cis	FALSE	LD_Chr_17_2242066867_2242160518	intron_variant	MODIFIER	NA
rs33778180	2240876783	17	Fahd1	2240472789	2240474261	17	1.91e-25	cis	FALSE	LD_Chr_17_2240361950_2241076094	intron_variant	MODIFIER	NA
rs33778179	2240876819	17	Fahd1	2240472789	2240474261	17	1.91e-25	cis	FALSE	LD_Chr_17_2240361950_2241076094	intron_variant	MODIFIER	NA
rs33775029	2241012008	17	Fahd1	2240472789	2240474261	17	1.91e-25	cis	FALSE	LD_Chr_17_2240361950_2241076094	downstream_gene_variant	MODIFIER	NA
rs33172136	2242160518	17	Fahd1	2240472789	2240474261	17	1.91e-25	cis	FALSE	NA	non_coding_transcript_exon_variant	MODIFIER	NA
rs33312667	2242116674	17	Fahd1	2240472789	2240474261	17	1.91e-25	cis	FALSE	LD_Chr_17_2242066867_2242160518	upstream_gene_variant	MODIFIER	NA
rs33345580	2240887640	17	Fahd1	2240472789	2240474261	17	1.91e-25	cis	FALSE	LD_Chr_17_2240361950_2241076094	intron_variant	MODIFIER	NA
rs33714100	2240891020	17	Fahd1	2240472789	2240474261	17	1.91e-25	cis	FALSE	LD_Chr_17_2240361950_2241076094	upstream_gene_variant	MODIFIER	NA
rs8252771	2242131413	17	Fahd1	2240472789	2240474261	17	1.91e-25	cis	FALSE	LD_Chr_17_2242066867_2242160518	intron_variant	MODIFIER	NA
rs29504539	2245600696	17	Glo1	2246216763	2246236556	17	1.92e-25	cis	FALSE	LD_Chr_17_2245536685_2245970474	upstream_gene_variant	MODIFIER	NA
rs32347369	2093162634	15	Mpst	2091778860	2091786457	15	2.11e-25	cis	FALSE	LD_Chr_15_2093113077_2093335325	intron_variant	MODIFIER	NA
rs33089273	2245526520	17	Glo1	2246216763	2246236556	17	2.22e-25	cis	FALSE	LD_Chr_17_2245499697_2245535320	NMD_transcript_variant	MODIFIER	NA
rs33139820	2240330929	17	Fahd1	2240472789	2240474261	17	2.28e-25	cis	FALSE	LD_Chr_17_2240065603_2240357262	upstream_gene_variant	MODIFIER	NA
rs27545775	675917043	4	Aldh4a1	677247741	677274565	4	2.36e-25	cis	FALSE	LD_Chr_4_675871952_675932282	synonymous_variant	LOW	NA
rs27562755	676752440	4	Aldh4a1	677247741	677274565	4	2.5e-25	cis	FALSE	LD_Chr_4_676629220_677256778	intron_variant	MODIFIER	NA
rs31662429	2095263238	15	Mpst	2091778860	2091786457	15	2.65e-25	cis	FALSE	LD_Chr_15_2094901717_2095513963	intron_variant	MODIFIER	NA
rs31667909	2095275456	15	Mpst	2091778860	2091786457	15	2.65e-25	cis	FALSE	LD_Chr_15_2094901717_2095513963	upstream_gene_variant	MODIFIER	NA
rs33261945	2245618774	17	Glo1	2246216763	2246236556	17	3.26e-25	cis	FALSE	LD_Chr_17_2245536685_2245970474	downstream_gene_variant	MODIFIER	NA
rs29534341	2245531880	17	Glo1	2246216763	2246236556	17	3.26e-25	cis	FALSE	LD_Chr_17_2245499697_2245535320	NMD_transcript_variant	MODIFIER	NA
rs30009167	1861823484	13	Cmya5	1861089274	1861193285	13	3.41e-25	cis	FALSE	LD_Chr_13_1860757122_1861913824	intron_variant	MODIFIER	NA
rs13481755	1802454349	13	Psmg3	833956583	833959876	5	3.72e-25	trans	FALSE	LD_Chr_13_1799628853_1803697190	intergenic_variant	MODIFIER	NA
rs37467511	2093166495	15	Mpst	2091778860	2091786457	15	4.28e-25	cis	FALSE	LD_Chr_15_2093113077_2093335325	intron_variant	MODIFIER	NA
rs32618999	171884981	1	Mpz	171150711	171161130	1	4.5e-25	cis	FALSE	LD_Chr_1_171438247_172381513	intron_variant	MODIFIER	+
rs27893266	599481814	4	Alad	600134044	600144793	4	5.14e-25	cis	FALSE	LD_Chr_4_597420328_600821767	downstream_gene_variant	MODIFIER	NA
rs27910562	599318751	4	Alad	600134044	600144793	4	5.14e-25	cis	FALSE	LD_Chr_4_597420328_600821767	NA	NA	NA
rs13477735	599482828	4	Alad	600134044	600144793	4	5.14e-25	cis	FALSE	LD_Chr_4_597420328_600821767	upstream_gene_variant	MODIFIER	NA
rs27893225	599510182	4	Alad	600134044	600144793	4	5.14e-25	cis	FALSE	LD_Chr_4_597420328_600821767	upstream_gene_variant	MODIFIER	NA
rs27893106	599680995	4	Alad	600134044	600144793	4	5.14e-25	cis	FALSE	LD_Chr_4_597420328_600821767	upstream_gene_variant	MODIFIER	NA
rs45759097	2242013371	17	Fahd1	2240472789	2240474261	17	5.67e-25	cis	FALSE	LD_Chr_17_2241846929_2242047278	intergenic_variant	MODIFIER	NA
rs27893198	599532541	4	Alad	600134044	600144793	4	6.01e-25	cis	FALSE	LD_Chr_4_597420328_600821767	intergenic_variant	MODIFIER	NA
rs50841920	2245501959	17	Glo1	2246216763	2246236556	17	6.02e-25	cis	FALSE	LD_Chr_17_2245499697_2245535320	intron_variant	MODIFIER	NA
rs31708026	2093092104	15	Mpst	2091778860	2091786457	15	6.02e-25	cis	FALSE	LD_Chr_15_2093037267_2093095561	downstream_gene_variant	MODIFIER	NA
rs30315065	2445890099	19	Sec31b	2445830764	2445859671	19	6.88e-25	cis	FALSE	LD_Chr_19_2445693208_2446246532	downstream_gene_variant	MODIFIER	NA
rs31290072	2445768670	19	Sec31b	2445830764	2445859671	19	6.88e-25	cis	FALSE	LD_Chr_19_2445693208_2446246532	non_coding_transcript_variant	MODIFIER	NA
rs36534446	2445784974	19	Sec31b	2445830764	2445859671	19	6.88e-25	cis	FALSE	LD_Chr_19_2445693208_2446246532	intergenic_variant	MODIFIER	NA
rs31281041	159926530	1	Prdx6	161240112	161251219	1	7.19e-25	cis	FALSE	NA	3_prime_UTR_variant	MODIFIER	NA
rs47455492	2239582522	17	Fahd1	2240472789	2240474261	17	7.42e-25	cis	FALSE	NA	upstream_gene_variant	MODIFIER	NA
rs51574934	2298641385	17	Cox7a2l	2299125815	2299141227	17	7.79e-25	cis	FALSE	LD_Chr_17_2298183073_2298694324	intergenic_variant	MODIFIER	NA
rs8242795	171057436	1	Mpz	171150711	171161130	1	7.83e-25	cis	FALSE	NA	intron_variant	MODIFIER	+
rs3707500	185346778	1	Bpnt1	185332149	185357777	1	7.92e-25	cis	TRUE	LD_Chr_1_185266751_185545687	intron_variant	MODIFIER	+
rs3675315	185430354	1	Bpnt1	185332149	185357777	1	7.92e-25	cis	FALSE	LD_Chr_1_185266751_185545687	upstream_gene_variant	MODIFIER	+
rs33831820	185057226	1	Bpnt1	185332149	185357777	1	7.92e-25	cis	FALSE	LD_Chr_1_185012333_185173890	intergenic_variant	MODIFIER	+
rs33826204	185063173	1	Bpnt1	185332149	185357777	1	7.92e-25	cis	FALSE	LD_Chr_1_185012333_185173890	intergenic_variant	MODIFIER	+
rs32613921	185111100	1	Bpnt1	185332149	185357777	1	7.92e-25	cis	FALSE	LD_Chr_1_185012333_185173890	intergenic_variant	MODIFIER	+
rs31704545	185111129	1	Bpnt1	185332149	185357777	1	7.92e-25	cis	FALSE	LD_Chr_1_185012333_185173890	intergenic_variant	MODIFIER	+
rs33825317	185117051	1	Bpnt1	185332149	185357777	1	7.92e-25	cis	FALSE	LD_Chr_1_185012333_185173890	intergenic_variant	MODIFIER	+
rs30959330	185316538	1	Bpnt1	185332149	185357777	1	7.92e-25	cis	FALSE	LD_Chr_1_185266751_185545687	downstream_gene_variant	MODIFIER	+
rs32803160	185350439	1	Bpnt1	185332149	185357777	1	7.92e-25	cis	TRUE	LD_Chr_1_185266751_185545687	intron_variant	MODIFIER	+
rs27567948	676986648	4	Aldh4a1	677247741	677274565	4	8.44e-25	cis	FALSE	LD_Chr_4_676629220_677256778	intron_variant	MODIFIER	NA
rs32044610	2095089312	15	Mpst	2091778860	2091786457	15	8.86e-25	cis	FALSE	LD_Chr_15_2094901717_2095513963	intron_variant	MODIFIER	NA
rs49084591	2298612155	17	Cox7a2l	2299125815	2299141227	17	9.96e-25	cis	FALSE	LD_Chr_17_2298183073_2298694324	intergenic_variant	MODIFIER	NA
rs49487631	2298698621	17	Cox7a2l	2299125815	2299141227	17	9.96e-25	cis	FALSE	LD_Chr_17_2298695064_2298901663	downstream_gene_variant	MODIFIER	NA
rs49715837	2298570017	17	Cox7a2l	2299125815	2299141227	17	9.96e-25	cis	FALSE	LD_Chr_17_2298183073_2298694324	intergenic_variant	MODIFIER	NA
rs33397214	2298695064	17	Cox7a2l	2299125815	2299141227	17	9.96e-25	cis	FALSE	NA	non_coding_transcript_variant	MODIFIER	NA
rs29130695	1752241799	12	Serpina3k	1752258025	1752265683	12	1e-24	cis	FALSE	NA	downstream_gene_variant	MODIFIER	NA
rs32318118	2093562507	15	Mpst	2091778860	2091786457	15	1.12e-24	cis	FALSE	LD_Chr_15_2093520056_2094599319	intron_variant	MODIFIER	NA
rs30385282	93347168	1	D2hgdh	93824909	93852348	1	1.12e-24	cis	FALSE	LD_Chr_1_93106085_93526021	NMD_transcript_variant	MODIFIER	NA
rs29498521	2243191511	17	Glo1	2246216763	2246236556	17	1.12e-24	cis	FALSE	LD_Chr_17_2243131062_2243286519	upstream_gene_variant	MODIFIER	NA
rs32331825	2093080523	15	Mpst	2091778860	2091786457	15	1.26e-24	cis	FALSE	LD_Chr_15_2093037267_2093095561	non_coding_transcript_variant	MODIFIER	NA
rs33167222	2240970640	17	Fahd1	2240472789	2240474261	17	1.3e-24	cis	FALSE	LD_Chr_17_2240361950_2241076094	upstream_gene_variant	MODIFIER	NA
rs29498855	2241026797	17	Fahd1	2240472789	2240474261	17	1.35e-24	cis	FALSE	LD_Chr_17_2240361950_2241076094	intron_variant	MODIFIER	NA
rs33311500	2240677553	17	Fahd1	2240472789	2240474261	17	1.36e-24	cis	FALSE	LD_Chr_17_2240361950_2241076094	downstream_gene_variant	MODIFIER	NA
rs13465800	1376736721	9	Acy1	1376979874	1376985212	9	1.36e-24	cis	FALSE	LD_Chr_9_1376309766_1376953147	downstream_gene_variant	MODIFIER	NA
rs33341352	2239440771	17	Fahd1	2240472789	2240474261	17	1.39e-24	cis	FALSE	LD_Chr_17_2239318856_2239498115	upstream_gene_variant	MODIFIER	NA
rs33570278	2239443887	17	Fahd1	2240472789	2240474261	17	1.39e-24	cis	FALSE	LD_Chr_17_2239318856_2239498115	downstream_gene_variant	MODIFIER	NA
rs33378106	2239477982	17	Fahd1	2240472789	2240474261	17	1.39e-24	cis	FALSE	LD_Chr_17_2239318856_2239498115	NMD_transcript_variant	MODIFIER	NA
rs33482509	2239479843	17	Fahd1	2240472789	2240474261	17	1.39e-24	cis	FALSE	LD_Chr_17_2239318856_2239498115	NMD_transcript_variant	MODIFIER	NA
rs51083795	2239587724	17	Fahd1	2240472789	2240474261	17	1.39e-24	cis	FALSE	LD_Chr_17_2239582522_2239921491	intergenic_variant	MODIFIER	NA
rs33391169	2239596441	17	Fahd1	2240472789	2240474261	17	1.39e-24	cis	FALSE	LD_Chr_17_2239582522_2239921491	downstream_gene_variant	MODIFIER	NA
rs6200761	2239605934	17	Fahd1	2240472789	2240474261	17	1.39e-24	cis	FALSE	LD_Chr_17_2239582522_2239921491	upstream_gene_variant	MODIFIER	NA
rs3670785	2239644997	17	Fahd1	2240472789	2240474261	17	1.39e-24	cis	FALSE	LD_Chr_17_2239582522_2239921491	upstream_gene_variant	MODIFIER	NA
rs33364691	2239384918	17	Fahd1	2240472789	2240474261	17	1.39e-24	cis	FALSE	LD_Chr_17_2239318856_2239498115	missense_variant	MODERATE	NA
rs52620860	2239410834	17	Fahd1	2240472789	2240474261	17	1.39e-24	cis	FALSE	LD_Chr_17_2239318856_2239498115	NA	NA	NA
rs48815739	2239436857	17	Fahd1	2240472789	2240474261	17	1.39e-24	cis	FALSE	LD_Chr_17_2239318856_2239498115	non_coding_transcript_variant	MODIFIER	NA
rs16807282	2239492084	17	Fahd1	2240472789	2240474261	17	1.39e-24	cis	FALSE	LD_Chr_17_2239318856_2239498115	upstream_gene_variant	MODIFIER	NA
rs51499189	2239495224	17	Fahd1	2240472789	2240474261	17	1.39e-24	cis	FALSE	LD_Chr_17_2239318856_2239498115	NA	NA	NA
rs46797544	2239497648	17	Fahd1	2240472789	2240474261	17	1.39e-24	cis	FALSE	LD_Chr_17_2239318856_2239498115	downstream_gene_variant	MODIFIER	NA
rs29538120	2239562842	17	Fahd1	2240472789	2240474261	17	1.39e-24	cis	FALSE	LD_Chr_17_2239500367_2239579944	upstream_gene_variant	MODIFIER	NA
rs46307873	2239564598	17	Fahd1	2240472789	2240474261	17	1.39e-24	cis	FALSE	LD_Chr_17_2239500367_2239579944	upstream_gene_variant	MODIFIER	NA
rs51705451	2239579944	17	Fahd1	2240472789	2240474261	17	1.39e-24	cis	FALSE	NA	upstream_gene_variant	MODIFIER	NA
rs32529597	2093160792	15	Mpst	2091778860	2091786457	15	1.59e-24	cis	FALSE	LD_Chr_15_2093113077_2093335325	3_prime_UTR_variant	MODIFIER	NA
rs32433388	676096659	4	Aldh4a1	677247741	677274565	4	1.67e-24	cis	FALSE	LD_Chr_4_675971308_676157190	intergenic_variant	MODIFIER	NA
rs27576555	676131238	4	Aldh4a1	677247741	677274565	4	1.67e-24	cis	FALSE	LD_Chr_4_675971308_676157190	intergenic_variant	MODIFIER	NA
rs27562347	676162597	4	Aldh4a1	677247741	677274565	4	1.67e-24	cis	FALSE	NA	intergenic_variant	MODIFIER	NA
rs37121300	2093295906	15	Mpst	2091778860	2091786457	15	1.76e-24	cis	FALSE	LD_Chr_15_2093113077_2093335325	non_coding_transcript_variant	MODIFIER	NA
rs29244308	1802539446	13	Psmg3	833956583	833959876	5	1.96e-24	trans	FALSE	LD_Chr_13_1799628853_1803697190	intergenic_variant	MODIFIER	NA
rs29565661	1803149746	13	Psmg3	833956583	833959876	5	1.96e-24	trans	FALSE	LD_Chr_13_1799628853_1803697190	intergenic_variant	MODIFIER	NA
rs29237964	1802235242	13	Psmg3	833956583	833959876	5	1.96e-24	trans	FALSE	LD_Chr_13_1799628853_1803697190	intron_variant	MODIFIER	NA
rs29999092	1802287263	13	Psmg3	833956583	833959876	5	1.96e-24	trans	FALSE	LD_Chr_13_1799628853_1803697190	intron_variant	MODIFIER	NA
rs3727136	1802302037	13	Psmg3	833956583	833959876	5	1.96e-24	trans	FALSE	LD_Chr_13_1799628853_1803697190	intron_variant	MODIFIER	NA
rs29231898	1802316219	13	Psmg3	833956583	833959876	5	1.96e-24	trans	FALSE	LD_Chr_13_1799628853_1803697190	intron_variant	MODIFIER	NA
rs29870748	1802345546	13	Psmg3	833956583	833959876	5	1.96e-24	trans	FALSE	LD_Chr_13_1799628853_1803697190	NMD_transcript_variant	MODIFIER	NA
rs29913986	1802419905	13	Psmg3	833956583	833959876	5	1.96e-24	trans	FALSE	LD_Chr_13_1799628853_1803697190	intergenic_variant	MODIFIER	NA
rs29820905	1802973792	13	Psmg3	833956583	833959876	5	1.96e-24	trans	FALSE	LD_Chr_13_1799628853_1803697190	NMD_transcript_variant	MODIFIER	NA
rs29495306	1802989234	13	Psmg3	833956583	833959876	5	1.96e-24	trans	FALSE	LD_Chr_13_1799628853_1803697190	non_coding_transcript_exon_variant	MODIFIER	NA
rs38195829	1803005441	13	Psmg3	833956583	833959876	5	1.96e-24	trans	FALSE	LD_Chr_13_1799628853_1803697190	downstream_gene_variant	MODIFIER	NA
rs29569746	1803009366	13	Psmg3	833956583	833959876	5	1.96e-24	trans	FALSE	LD_Chr_13_1799628853_1803697190	intron_variant	MODIFIER	NA
rs29226756	1803039777	13	Psmg3	833956583	833959876	5	1.96e-24	trans	FALSE	LD_Chr_13_1799628853_1803697190	upstream_gene_variant	MODIFIER	NA
rs50914288	1803088968	13	Psmg3	833956583	833959876	5	1.96e-24	trans	FALSE	LD_Chr_13_1799628853_1803697190	intergenic_variant	MODIFIER	NA
rs29224762	1803119306	13	Psmg3	833956583	833959876	5	1.96e-24	trans	FALSE	LD_Chr_13_1799628853_1803697190	downstream_gene_variant	MODIFIER	NA
rs29246752	1803137185	13	Psmg3	833956583	833959876	5	1.96e-24	trans	FALSE	LD_Chr_13_1799628853_1803697190	intergenic_variant	MODIFIER	NA
rs29568407	1803226903	13	Psmg3	833956583	833959876	5	1.96e-24	trans	FALSE	LD_Chr_13_1799628853_1803697190	upstream_gene_variant	MODIFIER	NA
rs4138364	1803308347	13	Psmg3	833956583	833959876	5	1.96e-24	trans	FALSE	LD_Chr_13_1799628853_1803697190	upstream_gene_variant	MODIFIER	NA
rs29530650	1803334031	13	Psmg3	833956583	833959876	5	1.96e-24	trans	FALSE	LD_Chr_13_1799628853_1803697190	intergenic_variant	MODIFIER	NA
rs29640957	1803334804	13	Psmg3	833956583	833959876	5	1.96e-24	trans	FALSE	LD_Chr_13_1799628853_1803697190	intergenic_variant	MODIFIER	NA
rs29230059	1803335319	13	Psmg3	833956583	833959876	5	1.96e-24	trans	FALSE	LD_Chr_13_1799628853_1803697190	intergenic_variant	MODIFIER	NA
rs30093538	1803365053	13	Psmg3	833956583	833959876	5	1.96e-24	trans	FALSE	LD_Chr_13_1799628853_1803697190	intergenic_variant	MODIFIER	NA
rs29684981	1803431522	13	Psmg3	833956583	833959876	5	1.96e-24	trans	FALSE	LD_Chr_13_1799628853_1803697190	intergenic_variant	MODIFIER	NA
rs30072033	1803472218	13	Psmg3	833956583	833959876	5	1.96e-24	trans	FALSE	LD_Chr_13_1799628853_1803697190	non_coding_transcript_variant	MODIFIER	NA
rs29235512	1803472805	13	Psmg3	833956583	833959876	5	1.96e-24	trans	FALSE	LD_Chr_13_1799628853_1803697190	non_coding_transcript_variant	MODIFIER	NA
rs29734031	1802205394	13	Psmg3	833956583	833959876	5	1.96e-24	trans	FALSE	LD_Chr_13_1799628853_1803697190	intergenic_variant	MODIFIER	NA
rs29528033	1802206152	13	Psmg3	833956583	833959876	5	1.96e-24	trans	FALSE	LD_Chr_13_1799628853_1803697190	intergenic_variant	MODIFIER	NA
rs29512335	1802210965	13	Psmg3	833956583	833959876	5	1.96e-24	trans	FALSE	LD_Chr_13_1799628853_1803697190	upstream_gene_variant	MODIFIER	NA
rs29535281	1802235874	13	Psmg3	833956583	833959876	5	1.96e-24	trans	FALSE	LD_Chr_13_1799628853_1803697190	intron_variant	MODIFIER	NA
rs29510177	1802240023	13	Psmg3	833956583	833959876	5	1.96e-24	trans	FALSE	LD_Chr_13_1799628853_1803697190	intron_variant	MODIFIER	NA
rs29549392	1802241331	13	Psmg3	833956583	833959876	5	1.96e-24	trans	FALSE	LD_Chr_13_1799628853_1803697190	intron_variant	MODIFIER	NA
rs29493505	1802242508	13	Psmg3	833956583	833959876	5	1.96e-24	trans	FALSE	LD_Chr_13_1799628853_1803697190	upstream_gene_variant	MODIFIER	NA
rs36928607	1802246383	13	Psmg3	833956583	833959876	5	1.96e-24	trans	FALSE	LD_Chr_13_1799628853_1803697190	upstream_gene_variant	MODIFIER	NA
rs29511320	1802261982	13	Psmg3	833956583	833959876	5	1.96e-24	trans	FALSE	LD_Chr_13_1799628853_1803697190	NMD_transcript_variant	MODIFIER	NA
rs37633705	1803137660	13	Psmg3	833956583	833959876	5	1.96e-24	trans	FALSE	LD_Chr_13_1799628853_1803697190	intergenic_variant	MODIFIER	NA
rs29241980	1803364023	13	Psmg3	833956583	833959876	5	1.96e-24	trans	FALSE	LD_Chr_13_1799628853_1803697190	intergenic_variant	MODIFIER	NA
rs29228594	1803364273	13	Psmg3	833956583	833959876	5	1.96e-24	trans	FALSE	LD_Chr_13_1799628853_1803697190	intergenic_variant	MODIFIER	NA
rs29687423	1803393728	13	Psmg3	833956583	833959876	5	1.96e-24	trans	FALSE	LD_Chr_13_1799628853_1803697190	intergenic_variant	MODIFIER	NA
rs36793245	1803393871	13	Psmg3	833956583	833959876	5	1.96e-24	trans	FALSE	LD_Chr_13_1799628853_1803697190	intergenic_variant	MODIFIER	NA
rs29243281	1803434232	13	Psmg3	833956583	833959876	5	1.96e-24	trans	FALSE	LD_Chr_13_1799628853_1803697190	intergenic_variant	MODIFIER	NA
rs29251102	1803478031	13	Psmg3	833956583	833959876	5	1.96e-24	trans	FALSE	LD_Chr_13_1799628853_1803697190	non_coding_transcript_variant	MODIFIER	NA
rs29238685	1803317455	13	Psmg3	833956583	833959876	5	1.96e-24	trans	FALSE	LD_Chr_13_1799628853_1803697190	intergenic_variant	MODIFIER	NA
rs31149346	2446205155	19	Arl3	2447844916	2447886892	19	1.97e-24	cis	FALSE	LD_Chr_19_2445693208_2446246532	intergenic_variant	MODIFIER	NA
rs30814524	2447122316	19	Arl3	2447844916	2447886892	19	1.97e-24	cis	FALSE	LD_Chr_19_2447091475_2447148916	intron_variant	MODIFIER	NA
rs31122292	2447929166	19	Arl3	2447844916	2447886892	19	1.97e-24	cis	FALSE	LD_Chr_19_2447624260_2448359008	non_coding_transcript_variant	MODIFIER	NA
rs37315296	2445945118	19	Arl3	2447844916	2447886892	19	1.97e-24	cis	FALSE	LD_Chr_19_2445693208_2446246532	non_coding_transcript_variant	MODIFIER	NA
rs31281477	2447345947	19	Arl3	2447844916	2447886892	19	1.97e-24	cis	FALSE	LD_Chr_19_2447344191_2447377426	downstream_gene_variant	MODIFIER	NA
rs30398161	2447736635	19	Arl3	2447844916	2447886892	19	1.97e-24	cis	FALSE	LD_Chr_19_2447624260_2448359008	intron_variant	MODIFIER	NA
rs30415594	2448112675	19	Arl3	2447844916	2447886892	19	1.97e-24	cis	FALSE	LD_Chr_19_2447624260_2448359008	intron_variant	MODIFIER	NA
rs31195317	2448285154	19	Arl3	2447844916	2447886892	19	1.97e-24	cis	FALSE	LD_Chr_19_2447624260_2448359008	intron_variant	MODIFIER	NA
rs48345180	2242082988	17	Fahd1	2240472789	2240474261	17	2.19e-24	cis	FALSE	LD_Chr_17_2242066867_2242160518	non_coding_transcript_variant	MODIFIER	NA
rs33425954	2242138530	17	Fahd1	2240472789	2240474261	17	2.19e-24	cis	FALSE	LD_Chr_17_2242066867_2242160518	intron_variant	MODIFIER	NA
rs33537098	2241960432	17	Fahd1	2240472789	2240474261	17	2.24e-24	cis	FALSE	LD_Chr_17_2241846929_2242047278	intergenic_variant	MODIFIER	NA
rs33517791	2242107873	17	Fahd1	2240472789	2240474261	17	2.24e-24	cis	FALSE	LD_Chr_17_2242066867_2242160518	non_coding_transcript_variant	MODIFIER	NA
rs31799460	599640171	4	Alad	600134044	600144793	4	2.3e-24	cis	FALSE	LD_Chr_4_597420328_600821767	upstream_gene_variant	MODIFIER	NA
rs31608982	173429208	1	Mpz	171150711	171161130	1	2.36e-24	cis	FALSE	LD_Chr_1_173370140_173679184	intron_variant	MODIFIER	+
rs31607985	173435822	1	Mpz	171150711	171161130	1	2.36e-24	cis	FALSE	LD_Chr_1_173370140_173679184	intron_variant	MODIFIER	+
rs33714007	1377073671	9	Acy1	1376979874	1376985212	9	2.85e-24	cis	FALSE	LD_Chr_9_1376955401_1378239628	non_coding_transcript_variant	MODIFIER	NA
rs49943866	2246991934	17	Glo1	2246216763	2246236556	17	2.89e-24	cis	FALSE	NA	intergenic_variant	MODIFIER	NA
rs33651438	2243580633	17	Glo1	2246216763	2246236556	17	2.89e-24	cis	FALSE	NA	intron_variant	MODIFIER	NA
rs33330137	2247033532	17	Glo1	2246216763	2246236556	17	3.05e-24	cis	FALSE	NA	NMD_transcript_variant	MODIFIER	NA
rs49999365	2299209832	17	Cox7a2l	2299125815	2299141227	17	3.26e-24	cis	FALSE	LD_Chr_17_2298908041_2299278376	downstream_gene_variant	MODIFIER	NA
rs33073986	2243620020	17	Glo1	2246216763	2246236556	17	3.32e-24	cis	FALSE	LD_Chr_17_2243607426_2243666528	downstream_gene_variant	MODIFIER	NA
rs39402659	135409276	1	Ppp1r12b	134754658	134955942	1	3.58e-24	cis	FALSE	LD_Chr_1_135328566_137777833	intron_variant	MODIFIER	NA
rs27584049	676924110	4	Aldh4a1	677247741	677274565	4	4.03e-24	cis	FALSE	LD_Chr_4_676629220_677256778	downstream_gene_variant	MODIFIER	NA
rs27547429	676854521	4	Aldh4a1	677247741	677274565	4	4.03e-24	cis	FALSE	LD_Chr_4_676629220_677256778	intron_variant	MODIFIER	NA
rs27608618	676866093	4	Aldh4a1	677247741	677274565	4	4.03e-24	cis	FALSE	LD_Chr_4_676629220_677256778	intron_variant	MODIFIER	NA
rs33063138	2241810341	17	Fahd1	2240472789	2240474261	17	4.16e-24	cis	FALSE	LD_Chr_17_2241690577_2241836408	downstream_gene_variant	MODIFIER	NA
rs33167089	2246585427	17	Glo1	2246216763	2246236556	17	4.43e-24	cis	FALSE	NA	intron_variant	MODIFIER	NA
rs33669414	1376794006	9	Acy1	1376979874	1376985212	9	4.75e-24	cis	FALSE	LD_Chr_9_1376309766_1376953147	intron_variant	MODIFIER	NA
rs33779731	2240630325	17	Fahd1	2240472789	2240474261	17	4.97e-24	cis	FALSE	LD_Chr_17_2240361950_2241076094	intron_variant	MODIFIER	NA
rs33101255	2240625709	17	Fahd1	2240472789	2240474261	17	4.97e-24	cis	FALSE	LD_Chr_17_2240361950_2241076094	intron_variant	MODIFIER	NA
rs33543612	2241846929	17	Fahd1	2240472789	2240474261	17	4.97e-24	cis	FALSE	NA	intron_variant	MODIFIER	NA
rs33779102	2240592578	17	Fahd1	2240472789	2240474261	17	4.97e-24	cis	FALSE	LD_Chr_17_2240361950_2241076094	intron_variant	MODIFIER	NA
rs33094611	2240544867	17	Fahd1	2240472789	2240474261	17	4.97e-24	cis	FALSE	LD_Chr_17_2240361950_2241076094	intron_variant	MODIFIER	NA
rs6196890	67516227	1	Acadl	66830839	66863277	1	5.9e-24	cis	FALSE	LD_Chr_1_65505631_67985509	intergenic_variant	MODIFIER	NA
rs33656717	2240545254	17	Fahd1	2240472789	2240474261	17	6.05e-24	cis	FALSE	LD_Chr_17_2240361950_2241076094	non_coding_transcript_variant	MODIFIER	NA
rs3673665	2242049819	17	Fahd1	2240472789	2240474261	17	6.39e-24	cis	FALSE	NA	intron_variant	MODIFIER	NA
rs33278310	2241992981	17	Fahd1	2240472789	2240474261	17	6.39e-24	cis	FALSE	LD_Chr_17_2241846929_2242047278	intergenic_variant	MODIFIER	NA
rs3687249	2242035532	17	Fahd1	2240472789	2240474261	17	6.39e-24	cis	FALSE	LD_Chr_17_2241846929_2242047278	upstream_gene_variant	MODIFIER	NA
rs33611782	2242034981	17	Fahd1	2240472789	2240474261	17	6.39e-24	cis	FALSE	LD_Chr_17_2241846929_2242047278	upstream_gene_variant	MODIFIER	NA
rs48476360	2242066867	17	Fahd1	2240472789	2240474261	17	6.39e-24	cis	FALSE	NA	downstream_gene_variant	MODIFIER	NA
rs50605531	2242066905	17	Fahd1	2240472789	2240474261	17	6.39e-24	cis	FALSE	LD_Chr_17_2242066867_2242160518	downstream_gene_variant	MODIFIER	NA
rs30435103	1376804382	9	Acy1	1376979874	1376985212	9	6.82e-24	cis	FALSE	LD_Chr_9_1376309766_1376953147	intergenic_variant	MODIFIER	NA
rs30389103	1376828123	9	Acy1	1376979874	1376985212	9	6.82e-24	cis	FALSE	LD_Chr_9_1376309766_1376953147	upstream_gene_variant	MODIFIER	NA
rs29892775	1376868961	9	Acy1	1376979874	1376985212	9	6.82e-24	cis	FALSE	LD_Chr_9_1376309766_1376953147	NMD_transcript_variant	MODIFIER	NA
rs36677920	1376870327	9	Acy1	1376979874	1376985212	9	6.82e-24	cis	FALSE	LD_Chr_9_1376309766_1376953147	non_coding_transcript_variant	MODIFIER	NA
rs30485352	1376684847	9	Acy1	1376979874	1376985212	9	6.82e-24	cis	FALSE	LD_Chr_9_1376309766_1376953147	intergenic_variant	MODIFIER	NA
rs6243302	1377091003	9	Acy1	1376979874	1376985212	9	6.82e-24	cis	FALSE	LD_Chr_9_1376955401_1378239628	intron_variant	MODIFIER	NA
rs33769627	1377114591	9	Acy1	1376979874	1376985212	9	6.82e-24	cis	FALSE	LD_Chr_9_1376955401_1378239628	downstream_gene_variant	MODIFIER	NA
rs30389249	1376947515	9	Acy1	1376979874	1376985212	9	6.82e-24	cis	FALSE	LD_Chr_9_1376309766_1376953147	intergenic_variant	MODIFIER	NA
rs30186018	1376947564	9	Acy1	1376979874	1376985212	9	6.82e-24	cis	FALSE	LD_Chr_9_1376309766_1376953147	intergenic_variant	MODIFIER	NA
rs29640383	1376955401	9	Acy1	1376979874	1376985212	9	6.82e-24	cis	FALSE	NA	intergenic_variant	MODIFIER	NA
rs6299195	1377022819	9	Acy1	1376979874	1376985212	9	6.82e-24	cis	FALSE	LD_Chr_9_1376955401_1378239628	upstream_gene_variant	MODIFIER	NA
rs30227897	1377036832	9	Acy1	1376979874	1376985212	9	6.82e-24	cis	FALSE	LD_Chr_9_1376955401_1378239628	downstream_gene_variant	MODIFIER	NA
rs33724430	1377071967	9	Acy1	1376979874	1376985212	9	6.82e-24	cis	FALSE	LD_Chr_9_1376955401_1378239628	non_coding_transcript_variant	MODIFIER	NA
rs29782283	1377120569	9	Acy1	1376979874	1376985212	9	6.82e-24	cis	FALSE	LD_Chr_9_1376955401_1378239628	upstream_gene_variant	MODIFIER	NA
rs29944722	1376761577	9	Acy1	1376979874	1376985212	9	6.82e-24	cis	FALSE	LD_Chr_9_1376309766_1376953147	non_coding_transcript_variant	MODIFIER	NA
rs30133836	1376761753	9	Acy1	1376979874	1376985212	9	6.82e-24	cis	FALSE	LD_Chr_9_1376309766_1376953147	synonymous_variant	LOW	NA
rs37474724	1376860283	9	Acy1	1376979874	1376985212	9	6.82e-24	cis	FALSE	LD_Chr_9_1376309766_1376953147	intron_variant	MODIFIER	NA
rs39494283	1376860705	9	Acy1	1376979874	1376985212	9	6.82e-24	cis	FALSE	LD_Chr_9_1376309766_1376953147	intron_variant	MODIFIER	NA
rs36712680	1376862620	9	Acy1	1376979874	1376985212	9	6.82e-24	cis	FALSE	LD_Chr_9_1376309766_1376953147	intron_variant	MODIFIER	NA
rs30032938	1376950064	9	Acy1	1376979874	1376985212	9	6.82e-24	cis	FALSE	LD_Chr_9_1376309766_1376953147	intergenic_variant	MODIFIER	NA
rs38191488	1376987525	9	Acy1	1376979874	1376985212	9	6.82e-24	cis	FALSE	LD_Chr_9_1376955401_1378239628	missense_variant	MODERATE	NA
rs36621534	1376988799	9	Acy1	1376979874	1376985212	9	6.82e-24	cis	FALSE	LD_Chr_9_1376955401_1378239628	intron_variant	MODIFIER	NA
rs37870806	1377048824	9	Acy1	1376979874	1376985212	9	6.82e-24	cis	FALSE	LD_Chr_9_1376955401_1378239628	synonymous_variant	LOW	NA
rs37910245	1377086961	9	Acy1	1376979874	1376985212	9	6.82e-24	cis	FALSE	LD_Chr_9_1376955401_1378239628	non_coding_transcript_variant	MODIFIER	NA
rs33714190	2299415160	17	Cox7a2l	2299125815	2299141227	17	6.87e-24	cis	FALSE	LD_Chr_17_2299364879_2300346057	intron_variant	MODIFIER	NA
rs33774595	2240933124	17	Fahd1	2240472789	2240474261	17	7.07e-24	cis	FALSE	LD_Chr_17_2240361950_2241076094	intron_variant	MODIFIER	NA
rs33333103	2245499697	17	Glo1	2246216763	2246236556	17	7.15e-24	cis	FALSE	NA	intron_variant	MODIFIER	NA
rs33148275	2245502531	17	Glo1	2246216763	2246236556	17	7.15e-24	cis	FALSE	LD_Chr_17_2245499697_2245535320	non_coding_transcript_variant	MODIFIER	NA
rs37813693	2445770118	19	Sec31b	2445830764	2445859671	19	7.22e-24	cis	FALSE	LD_Chr_19_2445693208_2446246532	non_coding_transcript_variant	MODIFIER	NA
rs29926952	1803484320	13	Psmg3	833956583	833959876	5	7.25e-24	trans	FALSE	LD_Chr_13_1799628853_1803697190	non_coding_transcript_variant	MODIFIER	NA
rs33236283	2298991473	17	Cox7a2l	2299125815	2299141227	17	7.33e-24	cis	FALSE	LD_Chr_17_2298908041_2299278376	intron_variant	MODIFIER	NA
rs33777947	2241069093	17	Fahd1	2240472789	2240474261	17	7.42e-24	cis	FALSE	LD_Chr_17_2240361950_2241076094	intergenic_variant	MODIFIER	NA
rs33776844	2241089508	17	Fahd1	2240472789	2240474261	17	7.42e-24	cis	FALSE	LD_Chr_17_2241083219_2241170982	non_coding_transcript_variant	MODIFIER	NA
rs33355567	2241102440	17	Fahd1	2240472789	2240474261	17	7.42e-24	cis	FALSE	LD_Chr_17_2241083219_2241170982	downstream_gene_variant	MODIFIER	NA
rs33563315	2241156745	17	Fahd1	2240472789	2240474261	17	7.42e-24	cis	FALSE	LD_Chr_17_2241083219_2241170982	downstream_gene_variant	MODIFIER	NA
rs27544418	676548190	4	Aldh4a1	677247741	677274565	4	7.48e-24	cis	FALSE	LD_Chr_4_676163577_676576704	intergenic_variant	MODIFIER	NA
rs33779727	2240631026	17	Fahd1	2240472789	2240474261	17	7.55e-24	cis	FALSE	LD_Chr_17_2240361950_2241076094	intron_variant	MODIFIER	NA
rs33496941	2244905104	17	Glo1	2246216763	2246236556	17	7.62e-24	cis	FALSE	LD_Chr_17_2244903051_2244914611	intron_variant	MODIFIER	NA
rs33435553	2244741610	17	Glo1	2246216763	2246236556	17	7.62e-24	cis	FALSE	LD_Chr_17_2244735426_2244870049	intron_variant	MODIFIER	NA
rs46744996	2244735505	17	Glo1	2246216763	2246236556	17	7.62e-24	cis	FALSE	LD_Chr_17_2244735426_2244870049	upstream_gene_variant	MODIFIER	NA
rs32176354	2094564349	15	Mpst	2091778860	2091786457	15	7.67e-24	cis	FALSE	LD_Chr_15_2093520056_2094599319	upstream_gene_variant	MODIFIER	NA
rs27611871	677577691	4	Aldh4a1	677247741	677274565	4	7.75e-24	cis	FALSE	LD_Chr_4_677313154_677590848	intergenic_variant	MODIFIER	NA
rs27642555	677365388	4	Aldh4a1	677247741	677274565	4	7.75e-24	cis	FALSE	LD_Chr_4_677313154_677590848	downstream_gene_variant	MODIFIER	NA
rs27642470	677385873	4	Aldh4a1	677247741	677274565	4	7.75e-24	cis	FALSE	LD_Chr_4_677313154_677590848	intron_variant	MODIFIER	NA
rs32344749	677413662	4	Aldh4a1	677247741	677274565	4	7.75e-24	cis	FALSE	LD_Chr_4_677313154_677590848	intron_variant	MODIFIER	NA
rs32327237	677413681	4	Aldh4a1	677247741	677274565	4	7.75e-24	cis	FALSE	LD_Chr_4_677313154_677590848	intron_variant	MODIFIER	NA
rs32768914	171932209	1	Mpz	171150711	171161130	1	8.29e-24	cis	FALSE	LD_Chr_1_171438247_172381513	intron_variant	MODIFIER	+
rs28321986	600275031	4	Alad	600134044	600144793	4	8.47e-24	cis	FALSE	LD_Chr_4_597420328_600821767	intron_variant	MODIFIER	NA
rs47604249	1803515277	13	Psmg3	833956583	833959876	5	9.87e-24	trans	FALSE	LD_Chr_13_1799628853_1803697190	intergenic_variant	MODIFIER	NA
rs30390510	93095115	1	D2hgdh	93824909	93852348	1	9.9e-24	cis	FALSE	NA	intron_variant	MODIFIER	NA
rs33496083	2241125183	17	Fahd1	2240472789	2240474261	17	1.01e-23	cis	FALSE	LD_Chr_17_2241083219_2241170982	upstream_gene_variant	MODIFIER	NA
rs52203435	2298636754	17	Cox7a2l	2299125815	2299141227	17	1.03e-23	cis	FALSE	LD_Chr_17_2298183073_2298694324	intergenic_variant	MODIFIER	NA
rs47970255	2298655740	17	Cox7a2l	2299125815	2299141227	17	1.03e-23	cis	FALSE	LD_Chr_17_2298183073_2298694324	downstream_gene_variant	MODIFIER	NA
rs33287398	2243338164	17	Glo1	2246216763	2246236556	17	1.04e-23	cis	FALSE	LD_Chr_17_2243337864_2243364759	downstream_gene_variant	MODIFIER	NA
rs33508082	2298817012	17	Cox7a2l	2299125815	2299141227	17	1.05e-23	cis	FALSE	LD_Chr_17_2298695064_2298901663	intergenic_variant	MODIFIER	NA
rs30352970	2447378861	19	Arl3	2447844916	2447886892	19	1.07e-23	cis	FALSE	NA	downstream_gene_variant	MODIFIER	NA
rs27880096	597512419	4	Alad	600134044	600144793	4	1.08e-23	cis	FALSE	LD_Chr_4_597420328_600821767	non_coding_transcript_variant	MODIFIER	NA
rs31042020	172195781	1	Mpz	171150711	171161130	1	1.09e-23	cis	FALSE	LD_Chr_1_171438247_172381513	downstream_gene_variant	MODIFIER	+
rs33047164	2241117852	17	Fahd1	2240472789	2240474261	17	1.09e-23	cis	FALSE	LD_Chr_17_2241083219_2241170982	intron_variant	MODIFIER	NA
rs33665114	2240507189	17	Fahd1	2240472789	2240474261	17	1.22e-23	cis	FALSE	LD_Chr_17_2240361950_2241076094	NA	NA	NA
rs51308612	2239589650	17	Fahd1	2240472789	2240474261	17	1.31e-23	cis	FALSE	LD_Chr_17_2239582522_2239921491	intergenic_variant	MODIFIER	NA
rs6229135	2239683535	17	Fahd1	2240472789	2240474261	17	1.31e-23	cis	FALSE	LD_Chr_17_2239582522_2239921491	intron_variant	MODIFIER	NA
rs31111126	2445851541	19	Sec31b	2445830764	2445859671	19	1.37e-23	cis	TRUE	LD_Chr_19_2445693208_2446246532	intron_variant	MODIFIER	NA
rs31142520	2445857134	19	Sec31b	2445830764	2445859671	19	1.37e-23	cis	TRUE	LD_Chr_19_2445693208_2446246532	downstream_gene_variant	MODIFIER	NA
rs33214820	2299170631	17	Cox7a2l	2299125815	2299141227	17	1.51e-23	cis	FALSE	LD_Chr_17_2298908041_2299278376	intergenic_variant	MODIFIER	NA
rs49613469	2299123598	17	Cox7a2l	2299125815	2299141227	17	1.51e-23	cis	FALSE	LD_Chr_17_2298908041_2299278376	downstream_gene_variant	MODIFIER	NA
rs46439475	2299053233	17	Cox7a2l	2299125815	2299141227	17	1.51e-23	cis	FALSE	LD_Chr_17_2298908041_2299278376	intron_variant	MODIFIER	NA
rs33691291	2299055323	17	Cox7a2l	2299125815	2299141227	17	1.51e-23	cis	FALSE	LD_Chr_17_2298908041_2299278376	intron_variant	MODIFIER	NA
rs33299460	2299066815	17	Cox7a2l	2299125815	2299141227	17	1.51e-23	cis	FALSE	LD_Chr_17_2298908041_2299278376	intron_variant	MODIFIER	NA
rs33557390	2299067358	17	Cox7a2l	2299125815	2299141227	17	1.51e-23	cis	FALSE	LD_Chr_17_2298908041_2299278376	intron_variant	MODIFIER	NA
rs33097660	2299090394	17	Cox7a2l	2299125815	2299141227	17	1.51e-23	cis	FALSE	LD_Chr_17_2298908041_2299278376	intron_variant	MODIFIER	NA
rs48964862	2299096234	17	Cox7a2l	2299125815	2299141227	17	1.51e-23	cis	FALSE	LD_Chr_17_2298908041_2299278376	non_coding_transcript_variant	MODIFIER	NA
rs33706650	2299190078	17	Cox7a2l	2299125815	2299141227	17	1.51e-23	cis	FALSE	LD_Chr_17_2298908041_2299278376	intergenic_variant	MODIFIER	NA
rs6405085	2299205197	17	Cox7a2l	2299125815	2299141227	17	1.51e-23	cis	FALSE	LD_Chr_17_2298908041_2299278376	downstream_gene_variant	MODIFIER	NA
rs46175298	2299210881	17	Cox7a2l	2299125815	2299141227	17	1.51e-23	cis	FALSE	LD_Chr_17_2298908041_2299278376	3_prime_UTR_variant	MODIFIER	NA
rs45750803	2299241969	17	Cox7a2l	2299125815	2299141227	17	1.51e-23	cis	FALSE	LD_Chr_17_2298908041_2299278376	intron_variant	MODIFIER	NA
rs33409275	2299278376	17	Cox7a2l	2299125815	2299141227	17	1.51e-23	cis	FALSE	NA	intergenic_variant	MODIFIER	NA
rs6253932	2298983197	17	Cox7a2l	2299125815	2299141227	17	1.51e-23	cis	FALSE	LD_Chr_17_2298908041_2299278376	intron_variant	MODIFIER	NA
rs33718877	2298859634	17	Cox7a2l	2299125815	2299141227	17	1.51e-23	cis	FALSE	LD_Chr_17_2298695064_2298901663	intergenic_variant	MODIFIER	NA
rs50569920	2298878959	17	Cox7a2l	2299125815	2299141227	17	1.51e-23	cis	FALSE	LD_Chr_17_2298695064_2298901663	intergenic_variant	MODIFIER	NA
rs49811031	2298901663	17	Cox7a2l	2299125815	2299141227	17	1.51e-23	cis	FALSE	NA	intergenic_variant	MODIFIER	NA
rs29709497	1803215943	13	Psmg3	833956583	833959876	5	1.69e-23	trans	FALSE	LD_Chr_13_1799628853_1803697190	upstream_gene_variant	MODIFIER	NA
rs32338468	2093311554	15	Mpst	2091778860	2091786457	15	1.75e-23	cis	FALSE	LD_Chr_15_2093113077_2093335325	intron_variant	MODIFIER	NA
rs46634518	2246996721	17	Glo1	2246216763	2246236556	17	1.76e-23	cis	FALSE	NA	intergenic_variant	MODIFIER	NA
rs46210479	2247000661	17	Glo1	2246216763	2246236556	17	1.76e-23	cis	FALSE	LD_Chr_17_2246996721_2247033495	intergenic_variant	MODIFIER	NA
rs33327807	2246993206	17	Glo1	2246216763	2246236556	17	1.76e-23	cis	FALSE	NA	intergenic_variant	MODIFIER	NA
rs27893051	599767994	4	Alad	600134044	600144793	4	1.77e-23	cis	FALSE	LD_Chr_4_597420328_600821767	downstream_gene_variant	MODIFIER	NA
rs27893023	599814549	4	Alad	600134044	600144793	4	1.81e-23	cis	FALSE	LD_Chr_4_597420328_600821767	downstream_gene_variant	MODIFIER	NA
rs31896303	2095769120	15	Mpst	2091778860	2091786457	15	1.85e-23	cis	FALSE	LD_Chr_15_2095591745_2096303909	upstream_gene_variant	MODIFIER	NA
rs6238465	1803290434	13	Psmg3	833956583	833959876	5	1.89e-23	trans	FALSE	LD_Chr_13_1799628853_1803697190	downstream_gene_variant	MODIFIER	NA
rs33316619	2241117495	17	Fahd1	2240472789	2240474261	17	1.93e-23	cis	FALSE	LD_Chr_17_2241083219_2241170982	intron_variant	MODIFIER	NA
rs31566625	2096289603	15	Mpst	2091778860	2091786457	15	1.95e-23	cis	FALSE	LD_Chr_15_2095591745_2096303909	intron_variant	MODIFIER	NA
rs31572989	172188773	1	Mpz	171150711	171161130	1	2.15e-23	cis	FALSE	LD_Chr_1_171438247_172381513	NMD_transcript_variant	MODIFIER	+
rs31527341	171986302	1	Mpz	171150711	171161130	1	2.15e-23	cis	FALSE	LD_Chr_1_171438247_172381513	intergenic_variant	MODIFIER	+
rs31577295	172071875	1	Mpz	171150711	171161130	1	2.15e-23	cis	FALSE	LD_Chr_1_171438247_172381513	intron_variant	MODIFIER	+
rs31574688	172168086	1	Mpz	171150711	171161130	1	2.15e-23	cis	FALSE	LD_Chr_1_171438247_172381513	NMD_transcript_variant	MODIFIER	+
rs33598835	2241021364	17	Fahd1	2240472789	2240474261	17	2.24e-23	cis	FALSE	LD_Chr_17_2240361950_2241076094	downstream_gene_variant	MODIFIER	NA
rs30349319	2446380864	19	Arl3	2447844916	2447886892	19	2.31e-23	cis	FALSE	LD_Chr_19_2446325012_2446447334	non_coding_transcript_variant	MODIFIER	NA
rs31581004	172105819	1	Mpz	171150711	171161130	1	2.37e-23	cis	FALSE	LD_Chr_1_171438247_172381513	downstream_gene_variant	MODIFIER	+
rs30382537	93230395	1	D2hgdh	93824909	93852348	1	2.46e-23	cis	FALSE	LD_Chr_1_93106085_93526021	3_prime_UTR_variant	MODIFIER	NA
rs30033068	1376771537	9	Acy1	1376979874	1376985212	9	2.64e-23	cis	FALSE	LD_Chr_9_1376309766_1376953147	missense_variant	MODERATE	NA
rs27544494	676523311	4	Aldh4a1	677247741	677274565	4	2.65e-23	cis	FALSE	LD_Chr_4_676163577_676576704	intron_variant	MODIFIER	NA
rs30091625	1803009106	13	Psmg3	833956583	833959876	5	2.66e-23	trans	FALSE	LD_Chr_13_1799628853_1803697190	upstream_gene_variant	MODIFIER	NA
rs29222104	1803318591	13	Psmg3	833956583	833959876	5	2.66e-23	trans	FALSE	LD_Chr_13_1799628853_1803697190	intergenic_variant	MODIFIER	NA
rs29694727	1377026752	9	Acy1	1376979874	1376985212	9	2.68e-23	cis	FALSE	LD_Chr_9_1376955401_1378239628	intron_variant	MODIFIER	NA
rs50625988	2299250868	17	Cox7a2l	2299125815	2299141227	17	2.75e-23	cis	FALSE	LD_Chr_17_2298908041_2299278376	intron_variant	MODIFIER	NA
rs31558945	172489471	1	Mpz	171150711	171161130	1	3.24e-23	cis	FALSE	NA	upstream_gene_variant	MODIFIER	+
rs8239529	93076481	1	D2hgdh	93824909	93852348	1	3.28e-23	cis	FALSE	NA	intron_variant	MODIFIER	NA
rs30390505	93096145	1	D2hgdh	93824909	93852348	1	3.28e-23	cis	FALSE	LD_Chr_1_93095115_93096629	intron_variant	MODIFIER	NA
rs30389639	93096629	1	D2hgdh	93824909	93852348	1	3.28e-23	cis	FALSE	NA	intron_variant	MODIFIER	NA
rs31560464	172448250	1	Mpz	171150711	171161130	1	3.31e-23	cis	FALSE	LD_Chr_1_172433015_172487253	intergenic_variant	MODIFIER	+
rs31562098	172443527	1	Mpz	171150711	171161130	1	3.31e-23	cis	FALSE	LD_Chr_1_172433015_172487253	intergenic_variant	MODIFIER	+
rs31572828	172235364	1	Mpz	171150711	171161130	1	3.31e-23	cis	FALSE	LD_Chr_1_171438247_172381513	intron_variant	MODIFIER	+
rs31566066	172290559	1	Mpz	171150711	171161130	1	3.31e-23	cis	FALSE	LD_Chr_1_171438247_172381513	intron_variant	MODIFIER	+
rs31572184	172293063	1	Mpz	171150711	171161130	1	3.31e-23	cis	FALSE	LD_Chr_1_171438247_172381513	downstream_gene_variant	MODIFIER	+
rs31574880	172220439	1	Mpz	171150711	171161130	1	3.31e-23	cis	FALSE	LD_Chr_1_171438247_172381513	upstream_gene_variant	MODIFIER	+
rs32010243	172414490	1	Mpz	171150711	171161130	1	3.31e-23	cis	FALSE	NA	intergenic_variant	MODIFIER	+
rs30256791	66356310	1	Acadl	66830839	66863277	1	3.62e-23	cis	FALSE	LD_Chr_1_65505631_67985509	intron_variant	MODIFIER	NA
rs36353755	2445946067	19	Arl3	2447844916	2447886892	19	3.74e-23	cis	FALSE	LD_Chr_19_2445693208_2446246532	non_coding_transcript_variant	MODIFIER	NA
rs30323346	2448122771	19	Arl3	2447844916	2447886892	19	3.74e-23	cis	FALSE	LD_Chr_19_2447624260_2448359008	intron_variant	MODIFIER	NA
rs31193522	2448113135	19	Arl3	2447844916	2447886892	19	3.74e-23	cis	FALSE	LD_Chr_19_2447624260_2448359008	intron_variant	MODIFIER	NA
rs33408410	2298814755	17	Cox7a2l	2299125815	2299141227	17	3.81e-23	cis	FALSE	LD_Chr_17_2298695064_2298901663	intergenic_variant	MODIFIER	NA
rs4230877	2093288250	15	Mpst	2091778860	2091786457	15	4.17e-23	cis	FALSE	LD_Chr_15_2093113077_2093335325	NMD_transcript_variant	MODIFIER	NA
rs30750308	2448120022	19	Arl3	2447844916	2447886892	19	4.24e-23	cis	FALSE	LD_Chr_19_2447624260_2448359008	non_coding_transcript_variant	MODIFIER	NA
rs29498084	2242111163	17	Fahd1	2240472789	2240474261	17	4.51e-23	cis	FALSE	LD_Chr_17_2242066867_2242160518	non_coding_transcript_variant	MODIFIER	NA
rs3716222	173456096	1	Mpz	171150711	171161130	1	5.2e-23	cis	FALSE	LD_Chr_1_173370140_173679184	intron_variant	MODIFIER	+
rs31605073	173486559	1	Mpz	171150711	171161130	1	5.2e-23	cis	FALSE	LD_Chr_1_173370140_173679184	intron_variant	MODIFIER	+
rs6184690	173508500	1	Mpz	171150711	171161130	1	5.2e-23	cis	FALSE	LD_Chr_1_173370140_173679184	intergenic_variant	MODIFIER	+
rs31584856	173679184	1	Mpz	171150711	171161130	1	5.2e-23	cis	FALSE	NA	non_coding_transcript_exon_variant	MODIFIER	+
rs31611679	173384889	1	Mpz	171150711	171161130	1	5.2e-23	cis	FALSE	LD_Chr_1_173370140_173679184	intron_variant	MODIFIER	+
rs31969731	599813545	4	Alad	600134044	600144793	4	5.25e-23	cis	FALSE	LD_Chr_4_597420328_600821767	downstream_gene_variant	MODIFIER	NA
rs32140822	2093129392	15	Mpst	2091778860	2091786457	15	5.37e-23	cis	FALSE	LD_Chr_15_2093113077_2093335325	non_coding_transcript_exon_variant	MODIFIER	NA
rs30456652	2445944670	19	Arl3	2447844916	2447886892	19	5.42e-23	cis	FALSE	LD_Chr_19_2445693208_2446246532	non_coding_transcript_variant	MODIFIER	NA
rs50392426	2448151653	19	Arl3	2447844916	2447886892	19	5.44e-23	cis	FALSE	LD_Chr_19_2447624260_2448359008	intron_variant	MODIFIER	NA
rs31619987	173236138	1	Mpz	171150711	171161130	1	5.78e-23	cis	FALSE	LD_Chr_1_172937148_173340126	intergenic_variant	MODIFIER	+
rs33077993	2241677885	17	Fahd1	2240472789	2240474261	17	6.02e-23	cis	FALSE	NA	non_coding_transcript_variant	MODIFIER	NA
rs3692380	1376705725	9	Acy1	1376979874	1376985212	9	6.23e-23	cis	FALSE	LD_Chr_9_1376309766_1376953147	non_coding_transcript_exon_variant	MODIFIER	NA
rs33061257	1751747360	12	Serpina1a	1751773128	1751783101	12	6.81e-23	cis	FALSE	LD_Chr_12_1750708000_1751856496	intron_variant	MODIFIER	NA
rs33064417	1751686133	12	Serpina1a	1751773128	1751783101	12	6.81e-23	cis	FALSE	LD_Chr_12_1750708000_1751856496	intron_variant	MODIFIER	NA
rs33062038	1751757078	12	Serpina1a	1751773128	1751783101	12	6.81e-23	cis	FALSE	LD_Chr_12_1750708000_1751856496	non_coding_transcript_variant	MODIFIER	NA
rs48374446	2239957664	17	Fahd1	2240472789	2240474261	17	7.12e-23	cis	FALSE	LD_Chr_17_2239927735_2240023930	intron_variant	MODIFIER	NA
rs31964034	2096319452	15	Mpst	2091778860	2091786457	15	7.21e-23	cis	FALSE	NA	intron_variant	MODIFIER	NA
rs32801970	185350175	1	Bpnt1	185332149	185357777	1	7.33e-23	cis	TRUE	LD_Chr_1_185266751_185545687	intron_variant	MODIFIER	+
rs27576521	676141058	4	Aldh4a1	677247741	677274565	4	7.33e-23	cis	FALSE	LD_Chr_4_675971308_676157190	intergenic_variant	MODIFIER	NA
rs31226107	175386877	1	Mpz	171150711	171161130	1	7.63e-23	cis	FALSE	LD_Chr_1_175054333_175440535	intron_variant	MODIFIER	+
rs32523846	175394932	1	Mpz	171150711	171161130	1	7.63e-23	cis	FALSE	LD_Chr_1_175054333_175440535	intron_variant	MODIFIER	+
rs31798835	175405377	1	Mpz	171150711	171161130	1	7.63e-23	cis	FALSE	LD_Chr_1_175054333_175440535	intron_variant	MODIFIER	+
rs32527734	175427515	1	Mpz	171150711	171161130	1	7.63e-23	cis	FALSE	LD_Chr_1_175054333_175440535	intron_variant	MODIFIER	+
rs32527736	175427923	1	Mpz	171150711	171161130	1	7.63e-23	cis	FALSE	LD_Chr_1_175054333_175440535	intron_variant	MODIFIER	+
rs32528419	175440535	1	Mpz	171150711	171161130	1	7.63e-23	cis	FALSE	NA	intron_variant	MODIFIER	+
rs3720161	175381515	1	Mpz	171150711	171161130	1	7.63e-23	cis	FALSE	LD_Chr_1_175054333_175440535	upstream_gene_variant	MODIFIER	+
rs3720200	175381532	1	Mpz	171150711	171161130	1	7.63e-23	cis	FALSE	LD_Chr_1_175054333_175440535	intron_variant	MODIFIER	+
rs31823711	175425459	1	Mpz	171150711	171161130	1	7.63e-23	cis	FALSE	LD_Chr_1_175054333_175440535	intron_variant	MODIFIER	+
rs32462147	175425558	1	Mpz	171150711	171161130	1	7.63e-23	cis	FALSE	LD_Chr_1_175054333_175440535	intron_variant	MODIFIER	+
rs29229296	1802979500	13	Psmg3	833956583	833959876	5	7.73e-23	trans	FALSE	LD_Chr_13_1799628853_1803697190	intron_variant	MODIFIER	NA
rs27893021	599814633	4	Alad	600134044	600144793	4	7.78e-23	cis	FALSE	LD_Chr_4_597420328_600821767	3_prime_UTR_variant	MODIFIER	NA
rs33829702	185121876	1	Bpnt1	185332149	185357777	1	8.01e-23	cis	FALSE	LD_Chr_1_185012333_185173890	intergenic_variant	MODIFIER	+
rs31666127	2095253397	15	Mpst	2091778860	2091786457	15	8.71e-23	cis	FALSE	LD_Chr_15_2094901717_2095513963	intron_variant	MODIFIER	NA
rs33067526	1751856496	12	Serpina1a	1751773128	1751783101	12	9.54e-23	cis	FALSE	NA	intergenic_variant	MODIFIER	NA
rs27547628	676799684	4	Aldh4a1	677247741	677274565	4	9.55e-23	cis	FALSE	LD_Chr_4_676629220_677256778	downstream_gene_variant	MODIFIER	NA
rs31566918	172248434	1	Mpz	171150711	171161130	1	9.56e-23	cis	FALSE	LD_Chr_1_171438247_172381513	non_coding_transcript_variant	MODIFIER	+
rs27893084	599722443	4	Alad	600134044	600144793	4	9.79e-23	cis	FALSE	LD_Chr_4_597420328_600821767	intergenic_variant	MODIFIER	NA
rs33352141	2241614972	17	Fahd1	2240472789	2240474261	17	1.02e-22	cis	FALSE	NA	synonymous_variant	LOW	NA
rs31604246	173457382	1	Mpz	171150711	171161130	1	1.09e-22	cis	FALSE	LD_Chr_1_173370140_173679184	intron_variant	MODIFIER	+
rs31606484	173413497	1	Mpz	171150711	171161130	1	1.09e-22	cis	FALSE	LD_Chr_1_173370140_173679184	intron_variant	MODIFIER	+
rs31612297	173417785	1	Mpz	171150711	171161130	1	1.09e-22	cis	FALSE	LD_Chr_1_173370140_173679184	upstream_gene_variant	MODIFIER	+
rs31610688	173403855	1	Mpz	171150711	171161130	1	1.09e-22	cis	FALSE	LD_Chr_1_173370140_173679184	intron_variant	MODIFIER	+
rs32179042	39014729	1	Pdcl3	38985608	38997238	1	1.13e-22	cis	FALSE	LD_Chr_1_38760847_39017100	intergenic_variant	MODIFIER	NA
rs32635360	39014809	1	Pdcl3	38985608	38997238	1	1.13e-22	cis	FALSE	LD_Chr_1_38760847_39017100	intergenic_variant	MODIFIER	NA
rs33067916	38870403	1	Pdcl3	38985608	38997238	1	1.13e-22	cis	FALSE	LD_Chr_1_38760847_39017100	NMD_transcript_variant	MODIFIER	NA
rs33082097	38968470	1	Pdcl3	38985608	38997238	1	1.13e-22	cis	FALSE	LD_Chr_1_38760847_39017100	intergenic_variant	MODIFIER	NA
rs31029567	39015261	1	Pdcl3	38985608	38997238	1	1.13e-22	cis	FALSE	LD_Chr_1_38760847_39017100	intergenic_variant	MODIFIER	NA
rs31574517	39016071	1	Pdcl3	38985608	38997238	1	1.13e-22	cis	FALSE	LD_Chr_1_38760847_39017100	intergenic_variant	MODIFIER	NA
rs30550341	39017100	1	Pdcl3	38985608	38997238	1	1.13e-22	cis	FALSE	NA	intergenic_variant	MODIFIER	NA
rs46521147	2244735426	17	Glo1	2246216763	2246236556	17	1.19e-22	cis	FALSE	NA	upstream_gene_variant	MODIFIER	NA
rs49418360	1860393522	13	Cmya5	1861089274	1861193285	13	1.21e-22	cis	FALSE	NA	downstream_gene_variant	MODIFIER	NA
rs6282714	2246604826	17	Glo1	2246216763	2246236556	17	1.24e-22	cis	FALSE	LD_Chr_17_2246585427_2246625077	intron_variant	MODIFIER	NA
rs33296836	2246625077	17	Glo1	2246216763	2246236556	17	1.24e-22	cis	FALSE	NA	intron_variant	MODIFIER	NA
rs33682972	2246612044	17	Glo1	2246216763	2246236556	17	1.24e-22	cis	FALSE	LD_Chr_17_2246585427_2246625077	intron_variant	MODIFIER	NA
rs30637843	2445893295	19	Sec31b	2445830764	2445859671	19	1.25e-22	cis	FALSE	LD_Chr_19_2445693208_2446246532	downstream_gene_variant	MODIFIER	NA
rs31878668	172381331	1	Mpz	171150711	171161130	1	1.27e-22	cis	FALSE	LD_Chr_1_171438247_172381513	3_prime_UTR_variant	MODIFIER	+
rs32227134	38871204	1	Pdcl3	38985608	38997238	1	1.28e-22	cis	FALSE	LD_Chr_1_38760847_39017100	downstream_gene_variant	MODIFIER	NA
rs3684653	1376599766	9	Acy1	1376979874	1376985212	9	1.3e-22	cis	FALSE	LD_Chr_9_1376309766_1376953147	intron_variant	MODIFIER	NA
rs30289244	1376645204	9	Acy1	1376979874	1376985212	9	1.3e-22	cis	FALSE	LD_Chr_9_1376309766_1376953147	upstream_gene_variant	MODIFIER	NA
rs38577777	1376605783	9	Acy1	1376979874	1376985212	9	1.3e-22	cis	FALSE	LD_Chr_9_1376309766_1376953147	intron_variant	MODIFIER	NA
rs29886241	1376728212	9	Acy1	1376979874	1376985212	9	1.3e-22	cis	FALSE	LD_Chr_9_1376309766_1376953147	NMD_transcript_variant	MODIFIER	NA
rs30834272	135160325	1	Ppp1r12b	134754658	134955942	1	1.31e-22	cis	FALSE	LD_Chr_1_134653566_135312467	downstream_gene_variant	MODIFIER	NA
rs13476123	135166606	1	Ppp1r12b	134754658	134955942	1	1.31e-22	cis	FALSE	LD_Chr_1_134653566_135312467	intron_variant	MODIFIER	NA
rs31400775	175374650	1	Mpz	171150711	171161130	1	1.31e-22	cis	FALSE	LD_Chr_1_175054333_175440535	intron_variant	MODIFIER	+
rs27544977	676298641	4	Aldh4a1	677247741	677274565	4	1.39e-22	cis	FALSE	LD_Chr_4_676163577_676576704	intergenic_variant	MODIFIER	NA
rs3680618	134653566	1	Ppp1r12b	134754658	134955942	1	1.47e-22	cis	FALSE	NA	intron_variant	MODIFIER	NA
rs30315065	2445890099	19	Hif1an	2445876657	2445890081	19	1.5e-22	cis	FALSE	LD_Chr_19_2445693208_2446246532	downstream_gene_variant	MODIFIER	NA
rs31290072	2445768670	19	Hif1an	2445876657	2445890081	19	1.5e-22	cis	FALSE	LD_Chr_19_2445693208_2446246532	non_coding_transcript_variant	MODIFIER	NA
rs36534446	2445784974	19	Hif1an	2445876657	2445890081	19	1.5e-22	cis	FALSE	LD_Chr_19_2445693208_2446246532	intergenic_variant	MODIFIER	NA
rs32530494	175391720	1	Mpz	171150711	171161130	1	1.53e-22	cis	FALSE	LD_Chr_1_175054333_175440535	intron_variant	MODIFIER	+
rs49783915	2299243197	17	Cox7a2l	2299125815	2299141227	17	1.59e-22	cis	FALSE	LD_Chr_17_2298908041_2299278376	intron_variant	MODIFIER	NA
rs31531493	171949985	1	Mpz	171150711	171161130	1	1.59e-22	cis	FALSE	LD_Chr_1_171438247_172381513	3_prime_UTR_variant	MODIFIER	+
rs32073465	677641452	4	Aldh4a1	677247741	677274565	4	1.76e-22	cis	FALSE	NA	intergenic_variant	MODIFIER	NA
rs33083411	2243539666	17	Glo1	2246216763	2246236556	17	1.77e-22	cis	FALSE	LD_Chr_17_2243514059_2243580633	downstream_gene_variant	MODIFIER	NA
rs33248914	2242199515	17	Glo1	2246216763	2246236556	17	1.83e-22	cis	FALSE	LD_Chr_17_2242193855_2242258433	intron_variant	MODIFIER	NA
rs30302792	2445612614	19	Arl3	2447844916	2447886892	19	1.86e-22	cis	FALSE	LD_Chr_19_2445531301_2445634419	intron_variant	MODIFIER	NA
rs3706231	2241120251	17	Fahd1	2240472789	2240474261	17	1.92e-22	cis	FALSE	LD_Chr_17_2241083219_2241170982	intron_variant	MODIFIER	NA
rs36504113	1376642774	9	Acy1	1376979874	1376985212	9	1.94e-22	cis	FALSE	LD_Chr_9_1376309766_1376953147	intron_variant	MODIFIER	NA
rs29928292	1376724562	9	Acy1	1376979874	1376985212	9	1.94e-22	cis	FALSE	LD_Chr_9_1376309766_1376953147	intron_variant	MODIFIER	NA
rs3696793	1376580633	9	Acy1	1376979874	1376985212	9	1.94e-22	cis	FALSE	LD_Chr_9_1376309766_1376953147	intron_variant	MODIFIER	NA
rs51211954	2246488854	17	Glo1	2246216763	2246236556	17	1.97e-22	cis	FALSE	LD_Chr_17_2246436253_2246564895	non_coding_transcript_variant	MODIFIER	NA
rs29499316	2246660075	17	Glo1	2246216763	2246236556	17	2e-22	cis	FALSE	LD_Chr_17_2246656487_2246816761	intergenic_variant	MODIFIER	NA
rs27577618	676614316	4	Aldh4a1	677247741	677274565	4	2.21e-22	cis	FALSE	NA	intron_variant	MODIFIER	NA
rs13475991	94523242	1	D2hgdh	93824909	93852348	1	2.22e-22	cis	FALSE	NA	intergenic_variant	MODIFIER	NA
rs37250945	1802246043	13	Psmg3	833956583	833959876	5	2.28e-22	trans	FALSE	LD_Chr_13_1799628853_1803697190	upstream_gene_variant	MODIFIER	NA
rs29584605	1803253154	13	Psmg3	833956583	833959876	5	2.33e-22	trans	FALSE	LD_Chr_13_1799628853_1803697190	non_coding_transcript_variant	MODIFIER	NA
rs29531426	1803137483	13	Psmg3	833956583	833959876	5	2.35e-22	trans	FALSE	LD_Chr_13_1799628853_1803697190	intergenic_variant	MODIFIER	NA
rs29587456	1803215866	13	Psmg3	833956583	833959876	5	2.37e-22	trans	FALSE	LD_Chr_13_1799628853_1803697190	upstream_gene_variant	MODIFIER	NA
rs48632480	2239955164	17	Fahd1	2240472789	2240474261	17	2.41e-22	cis	FALSE	LD_Chr_17_2239927735_2240023930	intron_variant	MODIFIER	NA
rs31319273	159264283	1	Prdx6	161240112	161251219	1	2.51e-22	cis	FALSE	LD_Chr_1_159137334_159432967	upstream_gene_variant	MODIFIER	NA
rs3692210	1376705627	9	Acy1	1376979874	1376985212	9	2.78e-22	cis	FALSE	LD_Chr_9_1376309766_1376953147	downstream_gene_variant	MODIFIER	NA
rs30317987	2448112366	19	Arl3	2447844916	2447886892	19	2.97e-22	cis	FALSE	LD_Chr_19_2447624260_2448359008	intron_variant	MODIFIER	NA
rs32326253	185141287	1	Bpnt1	185332149	185357777	1	2.97e-22	cis	FALSE	LD_Chr_1_185012333_185173890	intergenic_variant	MODIFIER	+
rs3714641	599724208	4	Alad	600134044	600144793	4	3.06e-22	cis	FALSE	LD_Chr_4_597420328_600821767	intergenic_variant	MODIFIER	NA
rs32118846	597491401	4	Alad	600134044	600144793	4	3.06e-22	cis	FALSE	LD_Chr_4_597420328_600821767	intron_variant	MODIFIER	NA
rs27864161	597516010	4	Alad	600134044	600144793	4	3.06e-22	cis	FALSE	LD_Chr_4_597420328_600821767	non_coding_transcript_variant	MODIFIER	NA
rs27863936	597555097	4	Alad	600134044	600144793	4	3.06e-22	cis	FALSE	LD_Chr_4_597420328_600821767	intergenic_variant	MODIFIER	NA
rs27863919	597557404	4	Alad	600134044	600144793	4	3.06e-22	cis	FALSE	LD_Chr_4_597420328_600821767	intergenic_variant	MODIFIER	NA
rs27863915	597558275	4	Alad	600134044	600144793	4	3.06e-22	cis	FALSE	LD_Chr_4_597420328_600821767	intergenic_variant	MODIFIER	NA
rs27576722	676043618	4	Aldh4a1	677247741	677274565	4	3.15e-22	cis	FALSE	LD_Chr_4_675971308_676157190	intergenic_variant	MODIFIER	NA
rs27545573	675969680	4	Aldh4a1	677247741	677274565	4	3.15e-22	cis	FALSE	LD_Chr_4_675966317_675970423	upstream_gene_variant	MODIFIER	NA
rs3654495	597554682	4	Alad	600134044	600144793	4	3.28e-22	cis	FALSE	LD_Chr_4_597420328_600821767	intergenic_variant	MODIFIER	NA
rs37813693	2445770118	19	Hif1an	2445876657	2445890081	19	3.34e-22	cis	FALSE	LD_Chr_19_2445693208_2446246532	non_coding_transcript_variant	MODIFIER	NA
rs31569939	172195040	1	Mpz	171150711	171161130	1	3.36e-22	cis	FALSE	LD_Chr_1_171438247_172381513	downstream_gene_variant	MODIFIER	+
rs32013735	173608404	1	Mpz	171150711	171161130	1	3.45e-22	cis	FALSE	LD_Chr_1_173370140_173679184	intergenic_variant	MODIFIER	+
rs33120291	2241633020	17	Fahd1	2240472789	2240474261	17	3.52e-22	cis	FALSE	LD_Chr_17_2241617257_2241664073	intron_variant	MODIFIER	NA
rs46852716	2241633217	17	Fahd1	2240472789	2240474261	17	3.52e-22	cis	FALSE	LD_Chr_17_2241617257_2241664073	intron_variant	MODIFIER	NA
rs33243337	2241622263	17	Fahd1	2240472789	2240474261	17	3.52e-22	cis	FALSE	LD_Chr_17_2241617257_2241664073	intron_variant	MODIFIER	NA
rs46354551	2241629862	17	Fahd1	2240472789	2240474261	17	3.52e-22	cis	FALSE	LD_Chr_17_2241617257_2241664073	intron_variant	MODIFIER	NA
rs36924193	2445798873	19	Arl3	2447844916	2447886892	19	3.6e-22	cis	FALSE	LD_Chr_19_2445693208_2446246532	intergenic_variant	MODIFIER	NA
rs3685080	2243702379	17	Glo1	2246216763	2246236556	17	3.64e-22	cis	FALSE	LD_Chr_17_2243666558_2243702752	intron_variant	MODIFIER	NA
rs29502279	2239651858	17	Fahd1	2240472789	2240474261	17	3.77e-22	cis	FALSE	LD_Chr_17_2239582522_2239921491	downstream_gene_variant	MODIFIER	NA
rs4137444	93673177	1	D2hgdh	93824909	93852348	1	3.89e-22	cis	FALSE	NA	intergenic_variant	MODIFIER	NA
rs51168152	2241859080	17	Fahd1	2240472789	2240474261	17	3.93e-22	cis	FALSE	LD_Chr_17_2241846929_2242047278	intron_variant	MODIFIER	NA
rs33105760	2240633900	17	Fahd1	2240472789	2240474261	17	4.01e-22	cis	FALSE	LD_Chr_17_2240361950_2241076094	intron_variant	MODIFIER	NA
rs29757735	1859692393	13	Cmya5	1861089274	1861193285	13	4.02e-22	cis	FALSE	LD_Chr_13_1859691007_1859709059	non_coding_transcript_variant	MODIFIER	NA
rs33581226	2243560938	17	Glo1	2246216763	2246236556	17	4.16e-22	cis	FALSE	LD_Chr_17_2243514059_2243580633	intron_variant	MODIFIER	NA
rs33549002	2243607426	17	Glo1	2246216763	2246236556	17	4.16e-22	cis	FALSE	NA	intron_variant	MODIFIER	NA
rs33504943	2243446341	17	Glo1	2246216763	2246236556	17	4.16e-22	cis	FALSE	LD_Chr_17_2243398647_2243507344	upstream_gene_variant	MODIFIER	NA
rs33125243	2243472175	17	Glo1	2246216763	2246236556	17	4.16e-22	cis	FALSE	LD_Chr_17_2243398647_2243507344	intron_variant	MODIFIER	NA
rs29523894	2243504172	17	Glo1	2246216763	2246236556	17	4.16e-22	cis	FALSE	LD_Chr_17_2243398647_2243507344	synonymous_variant	LOW	NA
rs33094557	2243569689	17	Glo1	2246216763	2246236556	17	4.16e-22	cis	FALSE	LD_Chr_17_2243514059_2243580633	intron_variant	MODIFIER	NA
rs33789013	2243419386	17	Glo1	2246216763	2246236556	17	4.16e-22	cis	FALSE	LD_Chr_17_2243398647_2243507344	intron_variant	MODIFIER	NA
rs33452416	2243504702	17	Glo1	2246216763	2246236556	17	4.16e-22	cis	FALSE	LD_Chr_17_2243398647_2243507344	downstream_gene_variant	MODIFIER	NA
rs31111126	2445851541	19	Hif1an	2445876657	2445890081	19	4.41e-22	cis	FALSE	LD_Chr_19_2445693208_2446246532	intron_variant	MODIFIER	NA
rs31142520	2445857134	19	Hif1an	2445876657	2445890081	19	4.41e-22	cis	FALSE	LD_Chr_19_2445693208_2446246532	downstream_gene_variant	MODIFIER	NA
rs30853259	174988981	1	Mpz	171150711	171161130	1	5e-22	cis	FALSE	LD_Chr_1_174981953_175049013	intergenic_variant	MODIFIER	+
rs47709346	175007452	1	Mpz	171150711	171161130	1	5e-22	cis	FALSE	LD_Chr_1_174981953_175049013	intergenic_variant	MODIFIER	+
rs32468187	175027273	1	Mpz	171150711	171161130	1	5e-22	cis	FALSE	LD_Chr_1_174981953_175049013	intergenic_variant	MODIFIER	+
rs13466426	2239380634	17	Fahd1	2240472789	2240474261	17	5.02e-22	cis	FALSE	LD_Chr_17_2239318856_2239498115	downstream_gene_variant	MODIFIER	NA
rs13467752	93625106	1	D2hgdh	93824909	93852348	1	5.21e-22	cis	FALSE	LD_Chr_1_93614692_93673177	non_coding_transcript_exon_variant	MODIFIER	NA
rs30359298	93667326	1	D2hgdh	93824909	93852348	1	5.21e-22	cis	FALSE	LD_Chr_1_93614692_93673177	intergenic_variant	MODIFIER	NA
rs32484935	135422249	1	Ppp1r12b	134754658	134955942	1	5.42e-22	cis	FALSE	LD_Chr_1_135328566_137777833	NMD_transcript_variant	MODIFIER	NA
rs50857816	1376672627	9	Acy1	1376979874	1376985212	9	5.43e-22	cis	FALSE	LD_Chr_9_1376309766_1376953147	non_coding_transcript_variant	MODIFIER	NA
rs29251570	1803715856	13	Psmg3	833956583	833959876	5	5.57e-22	trans	FALSE	NA	NMD_transcript_variant	MODIFIER	NA
rs29228179	1803852019	13	Psmg3	833956583	833959876	5	5.57e-22	trans	FALSE	LD_Chr_13_1803715856_1804399535	non_coding_transcript_variant	MODIFIER	NA
rs29249396	1860804655	13	Cmya5	1861089274	1861193285	13	5.58e-22	cis	FALSE	LD_Chr_13_1860757122_1861913824	intron_variant	MODIFIER	NA
rs30837556	135173222	1	Ppp1r12b	134754658	134955942	1	5.85e-22	cis	FALSE	LD_Chr_1_134653566_135312467	intergenic_variant	MODIFIER	NA
rs32647244	175187012	1	Mpz	171150711	171161130	1	5.98e-22	cis	FALSE	LD_Chr_1_175054333_175440535	intron_variant	MODIFIER	+
rs49324494	2239844697	17	Fahd1	2240472789	2240474261	17	6.01e-22	cis	FALSE	LD_Chr_17_2239582522_2239921491	upstream_gene_variant	MODIFIER	NA
rs30841770	134825367	1	Ppp1r12b	134754658	134955942	1	6.09e-22	cis	TRUE	LD_Chr_1_134653566_135312467	intron_variant	MODIFIER	NA
rs30700858	135749383	1	Ppp1r12b	134754658	134955942	1	6.09e-22	cis	FALSE	LD_Chr_1_135328566_137777833	intron_variant	MODIFIER	NA
rs51297919	135749860	1	Ppp1r12b	134754658	134955942	1	6.11e-22	cis	FALSE	LD_Chr_1_135328566_137777833	intron_variant	MODIFIER	NA
rs31273614	135406094	1	Ppp1r12b	134754658	134955942	1	6.11e-22	cis	FALSE	LD_Chr_1_135328566_137777833	downstream_gene_variant	MODIFIER	NA
rs45674624	135755770	1	Ppp1r12b	134754658	134955942	1	6.11e-22	cis	FALSE	LD_Chr_1_135328566_137777833	downstream_gene_variant	MODIFIER	NA
rs32743953	135756829	1	Ppp1r12b	134754658	134955942	1	6.11e-22	cis	FALSE	LD_Chr_1_135328566_137777833	downstream_gene_variant	MODIFIER	NA
rs47412574	135790003	1	Ppp1r12b	134754658	134955942	1	6.11e-22	cis	FALSE	LD_Chr_1_135328566_137777833	intron_variant	MODIFIER	NA
rs50623062	135800221	1	Ppp1r12b	134754658	134955942	1	6.11e-22	cis	FALSE	LD_Chr_1_135328566_137777833	intron_variant	MODIFIER	NA
rs3667081	135804531	1	Ppp1r12b	134754658	134955942	1	6.11e-22	cis	FALSE	LD_Chr_1_135328566_137777833	intron_variant	MODIFIER	NA
rs38259042	135625228	1	Ppp1r12b	134754658	134955942	1	6.11e-22	cis	FALSE	LD_Chr_1_135328566_137777833	non_coding_transcript_variant	MODIFIER	NA
rs38450040	135629078	1	Ppp1r12b	134754658	134955942	1	6.11e-22	cis	FALSE	LD_Chr_1_135328566_137777833	intron_variant	MODIFIER	NA
rs36434050	135630920	1	Ppp1r12b	134754658	134955942	1	6.11e-22	cis	FALSE	LD_Chr_1_135328566_137777833	non_coding_transcript_variant	MODIFIER	NA
rs32258127	135643049	1	Ppp1r12b	134754658	134955942	1	6.11e-22	cis	FALSE	LD_Chr_1_135328566_137777833	non_coding_transcript_variant	MODIFIER	NA
rs3705272	135644565	1	Ppp1r12b	134754658	134955942	1	6.11e-22	cis	FALSE	LD_Chr_1_135328566_137777833	non_coding_transcript_variant	MODIFIER	NA
rs36495802	135658178	1	Ppp1r12b	134754658	134955942	1	6.11e-22	cis	FALSE	LD_Chr_1_135328566_137777833	intron_variant	MODIFIER	NA
rs36314276	135662856	1	Ppp1r12b	134754658	134955942	1	6.11e-22	cis	FALSE	LD_Chr_1_135328566_137777833	non_coding_transcript_variant	MODIFIER	NA
rs50820409	135702750	1	Ppp1r12b	134754658	134955942	1	6.11e-22	cis	FALSE	LD_Chr_1_135328566_137777833	intergenic_variant	MODIFIER	NA
rs50735468	135705141	1	Ppp1r12b	134754658	134955942	1	6.11e-22	cis	FALSE	LD_Chr_1_135328566_137777833	intergenic_variant	MODIFIER	NA
rs32652677	135509520	1	Ppp1r12b	134754658	134955942	1	6.11e-22	cis	FALSE	LD_Chr_1_135328566_137777833	intron_variant	MODIFIER	NA
rs47566283	135733511	1	Ppp1r12b	134754658	134955942	1	6.11e-22	cis	FALSE	LD_Chr_1_135328566_137777833	intron_variant	MODIFIER	NA
rs45965160	135748196	1	Ppp1r12b	134754658	134955942	1	6.11e-22	cis	FALSE	LD_Chr_1_135328566_137777833	intron_variant	MODIFIER	NA
rs46267697	135748325	1	Ppp1r12b	134754658	134955942	1	6.11e-22	cis	FALSE	LD_Chr_1_135328566_137777833	intron_variant	MODIFIER	NA
rs31658312	135427544	1	Ppp1r12b	134754658	134955942	1	6.11e-22	cis	FALSE	LD_Chr_1_135328566_137777833	NMD_transcript_variant	MODIFIER	NA
rs37951113	135560686	1	Ppp1r12b	134754658	134955942	1	6.11e-22	cis	FALSE	LD_Chr_1_135328566_137777833	intron_variant	MODIFIER	NA
rs37982064	135595968	1	Ppp1r12b	134754658	134955942	1	6.11e-22	cis	FALSE	LD_Chr_1_135328566_137777833	intron_variant	MODIFIER	NA
rs32386942	135409603	1	Ppp1r12b	134754658	134955942	1	6.11e-22	cis	FALSE	LD_Chr_1_135328566_137777833	NMD_transcript_variant	MODIFIER	NA
rs31825984	135418071	1	Ppp1r12b	134754658	134955942	1	6.11e-22	cis	FALSE	LD_Chr_1_135328566_137777833	non_coding_transcript_variant	MODIFIER	NA
rs32023334	135359908	1	Ppp1r12b	134754658	134955942	1	6.11e-22	cis	FALSE	LD_Chr_1_135328566_137777833	intron_variant	MODIFIER	NA
rs37150283	135456600	1	Ppp1r12b	134754658	134955942	1	6.11e-22	cis	FALSE	LD_Chr_1_135328566_137777833	intron_variant	MODIFIER	NA
rs36481584	135469058	1	Ppp1r12b	134754658	134955942	1	6.11e-22	cis	FALSE	LD_Chr_1_135328566_137777833	non_coding_transcript_variant	MODIFIER	NA
rs3676223	135470238	1	Ppp1r12b	134754658	134955942	1	6.11e-22	cis	FALSE	LD_Chr_1_135328566_137777833	intron_variant	MODIFIER	NA
rs38128121	135474748	1	Ppp1r12b	134754658	134955942	1	6.11e-22	cis	FALSE	LD_Chr_1_135328566_137777833	intron_variant	MODIFIER	NA
rs3722641	135246458	1	Ppp1r12b	134754658	134955942	1	6.11e-22	cis	FALSE	LD_Chr_1_134653566_135312467	upstream_gene_variant	MODIFIER	NA
rs36840810	135248473	1	Ppp1r12b	134754658	134955942	1	6.11e-22	cis	FALSE	LD_Chr_1_134653566_135312467	upstream_gene_variant	MODIFIER	NA
rs8271093	135271653	1	Ppp1r12b	134754658	134955942	1	6.11e-22	cis	FALSE	LD_Chr_1_134653566_135312467	non_coding_transcript_exon_variant	MODIFIER	NA
rs32295423	135331902	1	Ppp1r12b	134754658	134955942	1	6.11e-22	cis	FALSE	LD_Chr_1_135328566_137777833	intron_variant	MODIFIER	NA
rs36978566	135334159	1	Ppp1r12b	134754658	134955942	1	6.11e-22	cis	FALSE	LD_Chr_1_135328566_137777833	intron_variant	MODIFIER	NA
rs30839307	134831643	1	Ppp1r12b	134754658	134955942	1	6.11e-22	cis	TRUE	LD_Chr_1_134653566_135312467	intron_variant	MODIFIER	NA
rs30839296	134846443	1	Ppp1r12b	134754658	134955942	1	6.11e-22	cis	TRUE	LD_Chr_1_134653566_135312467	intron_variant	MODIFIER	NA
rs30839077	134900912	1	Ppp1r12b	134754658	134955942	1	6.11e-22	cis	TRUE	LD_Chr_1_134653566_135312467	non_coding_transcript_variant	MODIFIER	NA
rs30838068	134935493	1	Ppp1r12b	134754658	134955942	1	6.11e-22	cis	TRUE	LD_Chr_1_134653566_135312467	intron_variant	MODIFIER	NA
rs30848109	134704890	1	Ppp1r12b	134754658	134955942	1	6.11e-22	cis	FALSE	LD_Chr_1_134653566_135312467	upstream_gene_variant	MODIFIER	NA
rs30850740	134714303	1	Ppp1r12b	134754658	134955942	1	6.11e-22	cis	FALSE	LD_Chr_1_134653566_135312467	intron_variant	MODIFIER	NA
rs3718912	134753304	1	Ppp1r12b	134754658	134955942	1	6.11e-22	cis	FALSE	LD_Chr_1_134653566_135312467	downstream_gene_variant	MODIFIER	NA
rs30836541	135174658	1	Ppp1r12b	134754658	134955942	1	6.11e-22	cis	FALSE	LD_Chr_1_134653566_135312467	intergenic_variant	MODIFIER	NA
rs30839370	135211177	1	Ppp1r12b	134754658	134955942	1	6.11e-22	cis	FALSE	LD_Chr_1_134653566_135312467	intergenic_variant	MODIFIER	NA
rs30836118	135157652	1	Ppp1r12b	134754658	134955942	1	6.11e-22	cis	FALSE	LD_Chr_1_134653566_135312467	downstream_gene_variant	MODIFIER	NA
rs30833568	135163885	1	Ppp1r12b	134754658	134955942	1	6.11e-22	cis	FALSE	LD_Chr_1_134653566_135312467	intron_variant	MODIFIER	NA
rs30832722	135164694	1	Ppp1r12b	134754658	134955942	1	6.11e-22	cis	FALSE	LD_Chr_1_134653566_135312467	intron_variant	MODIFIER	NA
rs30838583	135170264	1	Ppp1r12b	134754658	134955942	1	6.11e-22	cis	FALSE	LD_Chr_1_134653566_135312467	upstream_gene_variant	MODIFIER	NA
rs30838376	135004921	1	Ppp1r12b	134754658	134955942	1	6.11e-22	cis	FALSE	LD_Chr_1_134653566_135312467	intron_variant	MODIFIER	NA
rs30840706	135014783	1	Ppp1r12b	134754658	134955942	1	6.11e-22	cis	FALSE	LD_Chr_1_134653566_135312467	intron_variant	MODIFIER	NA
rs3709823	135047993	1	Ppp1r12b	134754658	134955942	1	6.11e-22	cis	FALSE	LD_Chr_1_134653566_135312467	intron_variant	MODIFIER	NA
rs32808330	135167755	1	Ppp1r12b	134754658	134955942	1	6.11e-22	cis	FALSE	LD_Chr_1_134653566_135312467	upstream_gene_variant	MODIFIER	NA
rs31665195	135328566	1	Ppp1r12b	134754658	134955942	1	6.11e-22	cis	FALSE	NA	intron_variant	MODIFIER	NA
rs31435329	135328669	1	Ppp1r12b	134754658	134955942	1	6.11e-22	cis	FALSE	LD_Chr_1_135328566_137777833	intron_variant	MODIFIER	NA
rs31599806	135404021	1	Ppp1r12b	134754658	134955942	1	6.11e-22	cis	FALSE	LD_Chr_1_135328566_137777833	NMD_transcript_variant	MODIFIER	NA
rs32226934	135427634	1	Ppp1r12b	134754658	134955942	1	6.11e-22	cis	FALSE	LD_Chr_1_135328566_137777833	NMD_transcript_variant	MODIFIER	NA
rs32798800	135486593	1	Ppp1r12b	134754658	134955942	1	6.11e-22	cis	FALSE	LD_Chr_1_135328566_137777833	non_coding_transcript_variant	MODIFIER	NA
rs32135095	135689183	1	Ppp1r12b	134754658	134955942	1	6.11e-22	cis	FALSE	LD_Chr_1_135328566_137777833	upstream_gene_variant	MODIFIER	NA
rs32015032	135689500	1	Ppp1r12b	134754658	134955942	1	6.11e-22	cis	FALSE	LD_Chr_1_135328566_137777833	upstream_gene_variant	MODIFIER	NA
rs8236489	135809890	1	Ppp1r12b	134754658	134955942	1	6.11e-22	cis	FALSE	LD_Chr_1_135328566_137777833	intron_variant	MODIFIER	NA
rs8239512	135810402	1	Ppp1r12b	134754658	134955942	1	6.11e-22	cis	FALSE	LD_Chr_1_135328566_137777833	intron_variant	MODIFIER	NA
rs30874514	134464139	1	Ppp1r12b	134754658	134955942	1	6.11e-22	cis	FALSE	NA	intron_variant	MODIFIER	NA
rs30871626	134472588	1	Ppp1r12b	134754658	134955942	1	6.11e-22	cis	FALSE	NA	intron_variant	MODIFIER	NA
rs30870591	134474898	1	Ppp1r12b	134754658	134955942	1	6.11e-22	cis	FALSE	LD_Chr_1_134472588_134552878	upstream_gene_variant	MODIFIER	NA
rs13466244	134507315	1	Ppp1r12b	134754658	134955942	1	6.11e-22	cis	FALSE	LD_Chr_1_134472588_134552878	downstream_gene_variant	MODIFIER	NA
rs30869516	134517457	1	Ppp1r12b	134754658	134955942	1	6.11e-22	cis	FALSE	LD_Chr_1_134472588_134552878	upstream_gene_variant	MODIFIER	NA
rs30862193	134599089	1	Ppp1r12b	134754658	134955942	1	6.11e-22	cis	FALSE	LD_Chr_1_134590127_134653305	non_coding_transcript_exon_variant	MODIFIER	NA
rs30763361	134604646	1	Ppp1r12b	134754658	134955942	1	6.11e-22	cis	FALSE	LD_Chr_1_134590127_134653305	non_coding_transcript_variant	MODIFIER	NA
rs30872080	134612591	1	Ppp1r12b	134754658	134955942	1	6.11e-22	cis	FALSE	LD_Chr_1_134590127_134653305	intron_variant	MODIFIER	NA
rs30468350	134548505	1	Ppp1r12b	134754658	134955942	1	6.11e-22	cis	FALSE	LD_Chr_1_134472588_134552878	upstream_gene_variant	MODIFIER	NA
rs30861325	134661345	1	Ppp1r12b	134754658	134955942	1	6.11e-22	cis	FALSE	LD_Chr_1_134653566_135312467	intron_variant	MODIFIER	NA
rs30850336	134747924	1	Ppp1r12b	134754658	134955942	1	6.11e-22	cis	FALSE	LD_Chr_1_134653566_135312467	upstream_gene_variant	MODIFIER	NA
rs32603979	134779627	1	Ppp1r12b	134754658	134955942	1	6.11e-22	cis	TRUE	LD_Chr_1_134653566_135312467	intron_variant	MODIFIER	NA
rs30846390	134796864	1	Ppp1r12b	134754658	134955942	1	6.11e-22	cis	TRUE	LD_Chr_1_134653566_135312467	non_coding_transcript_variant	MODIFIER	NA
rs30842842	134813566	1	Ppp1r12b	134754658	134955942	1	6.11e-22	cis	TRUE	LD_Chr_1_134653566_135312467	downstream_gene_variant	MODIFIER	NA
rs30518164	134816466	1	Ppp1r12b	134754658	134955942	1	6.11e-22	cis	TRUE	LD_Chr_1_134653566_135312467	downstream_gene_variant	MODIFIER	NA
rs30507774	134837806	1	Ppp1r12b	134754658	134955942	1	6.11e-22	cis	TRUE	LD_Chr_1_134653566_135312467	non_coding_transcript_exon_variant	MODIFIER	NA
rs30841009	134896129	1	Ppp1r12b	134754658	134955942	1	6.11e-22	cis	TRUE	LD_Chr_1_134653566_135312467	intron_variant	MODIFIER	NA
rs32388791	134926691	1	Ppp1r12b	134754658	134955942	1	6.11e-22	cis	TRUE	LD_Chr_1_134653566_135312467	intron_variant	MODIFIER	NA
rs30834006	134999538	1	Ppp1r12b	134754658	134955942	1	6.11e-22	cis	FALSE	LD_Chr_1_134653566_135312467	intron_variant	MODIFIER	NA
rs30840924	135002945	1	Ppp1r12b	134754658	134955942	1	6.11e-22	cis	FALSE	LD_Chr_1_134653566_135312467	intron_variant	MODIFIER	NA
rs30840347	135040343	1	Ppp1r12b	134754658	134955942	1	6.11e-22	cis	FALSE	LD_Chr_1_134653566_135312467	intron_variant	MODIFIER	NA
rs6290558	135059438	1	Ppp1r12b	134754658	134955942	1	6.11e-22	cis	FALSE	LD_Chr_1_134653566_135312467	intron_variant	MODIFIER	NA
rs6402962	135110118	1	Ppp1r12b	134754658	134955942	1	6.11e-22	cis	FALSE	LD_Chr_1_134653566_135312467	downstream_gene_variant	MODIFIER	NA
rs30833327	135124768	1	Ppp1r12b	134754658	134955942	1	6.11e-22	cis	FALSE	LD_Chr_1_134653566_135312467	downstream_gene_variant	MODIFIER	NA
rs30791899	135126298	1	Ppp1r12b	134754658	134955942	1	6.11e-22	cis	FALSE	LD_Chr_1_134653566_135312467	downstream_gene_variant	MODIFIER	NA
rs30845486	134697953	1	Ppp1r12b	134754658	134955942	1	6.11e-22	cis	FALSE	LD_Chr_1_134653566_135312467	intron_variant	MODIFIER	NA
rs30891999	134590127	1	Ppp1r12b	134754658	134955942	1	6.11e-22	cis	FALSE	NA	intron_variant	MODIFIER	NA
rs31291979	134594944	1	Ppp1r12b	134754658	134955942	1	6.11e-22	cis	FALSE	LD_Chr_1_134590127_134653305	intron_variant	MODIFIER	NA
rs32605819	134604909	1	Ppp1r12b	134754658	134955942	1	6.11e-22	cis	FALSE	LD_Chr_1_134590127_134653305	non_coding_transcript_variant	MODIFIER	NA
rs30866834	134632461	1	Ppp1r12b	134754658	134955942	1	6.11e-22	cis	FALSE	LD_Chr_1_134590127_134653305	3_prime_UTR_variant	MODIFIER	NA
rs30816406	134462768	1	Ppp1r12b	134754658	134955942	1	6.11e-22	cis	FALSE	LD_Chr_1_134210577_134464139	intron_variant	MODIFIER	NA
rs3703729	134529958	1	Ppp1r12b	134754658	134955942	1	6.11e-22	cis	FALSE	LD_Chr_1_134472588_134552878	intergenic_variant	MODIFIER	NA
rs30759399	134554142	1	Ppp1r12b	134754658	134955942	1	6.11e-22	cis	FALSE	NA	upstream_gene_variant	MODIFIER	NA
rs30848112	134704725	1	Ppp1r12b	134754658	134955942	1	6.11e-22	cis	FALSE	LD_Chr_1_134653566_135312467	upstream_gene_variant	MODIFIER	NA
rs32501627	134661058	1	Ppp1r12b	134754658	134955942	1	6.11e-22	cis	FALSE	LD_Chr_1_134653566_135312467	intron_variant	MODIFIER	NA
rs31150006	134698553	1	Ppp1r12b	134754658	134955942	1	6.11e-22	cis	FALSE	LD_Chr_1_134653566_135312467	intron_variant	MODIFIER	NA
rs31562776	172381513	1	Mpz	171150711	171161130	1	6.21e-22	cis	FALSE	NA	3_prime_UTR_variant	MODIFIER	+
rs32528416	175440001	1	Mpz	171150711	171161130	1	6.25e-22	cis	FALSE	LD_Chr_1_175054333_175440535	intron_variant	MODIFIER	+
rs30243780	66300366	1	Acadl	66830839	66863277	1	6.61e-22	cis	FALSE	LD_Chr_1_65505631_67985509	intron_variant	MODIFIER	NA
rs27608589	676877624	4	Aldh4a1	677247741	677274565	4	6.7e-22	cis	FALSE	LD_Chr_4_676629220_677256778	intron_variant	MODIFIER	NA
rs29539110	2245057545	17	Glo1	2246216763	2246236556	17	6.91e-22	cis	FALSE	LD_Chr_17_2245056226_2245097747	non_coding_transcript_variant	MODIFIER	NA
rs33469447	2245067718	17	Glo1	2246216763	2246236556	17	6.91e-22	cis	FALSE	LD_Chr_17_2245056226_2245097747	non_coding_transcript_variant	MODIFIER	NA
rs49023588	2245179116	17	Glo1	2246216763	2246236556	17	6.91e-22	cis	FALSE	LD_Chr_17_2245177499_2245257886	non_coding_transcript_variant	MODIFIER	NA
rs49803656	2245206535	17	Glo1	2246216763	2246236556	17	6.91e-22	cis	FALSE	LD_Chr_17_2245177499_2245257886	NMD_transcript_variant	MODIFIER	NA
rs33283082	2245208044	17	Glo1	2246216763	2246236556	17	6.91e-22	cis	FALSE	LD_Chr_17_2245177499_2245257886	NMD_transcript_variant	MODIFIER	NA
rs49085969	2245218543	17	Glo1	2246216763	2246236556	17	6.91e-22	cis	FALSE	LD_Chr_17_2245177499_2245257886	non_coding_transcript_variant	MODIFIER	NA
rs33357930	2245257886	17	Glo1	2246216763	2246236556	17	6.91e-22	cis	FALSE	NA	intron_variant	MODIFIER	NA
rs33676987	2245204754	17	Glo1	2246216763	2246236556	17	6.91e-22	cis	FALSE	LD_Chr_17_2245177499_2245257886	non_coding_transcript_variant	MODIFIER	NA
rs33300743	2299099840	17	Cox7a2l	2299125815	2299141227	17	6.98e-22	cis	FALSE	LD_Chr_17_2298908041_2299278376	intron_variant	MODIFIER	NA
rs33556280	2299050346	17	Cox7a2l	2299125815	2299141227	17	6.98e-22	cis	FALSE	LD_Chr_17_2298908041_2299278376	intron_variant	MODIFIER	NA
rs32837608	65680453	1	Acadl	66830839	66863277	1	7.15e-22	cis	FALSE	LD_Chr_1_65505631_67985509	intergenic_variant	MODIFIER	NA
rs31344830	65641938	1	Acadl	66830839	66863277	1	7.26e-22	cis	FALSE	LD_Chr_1_65505631_67985509	intergenic_variant	MODIFIER	NA
rs31498510	65762067	1	Acadl	66830839	66863277	1	7.26e-22	cis	FALSE	LD_Chr_1_65505631_67985509	intergenic_variant	MODIFIER	NA
rs32839613	65648821	1	Acadl	66830839	66863277	1	7.26e-22	cis	FALSE	LD_Chr_1_65505631_67985509	intergenic_variant	MODIFIER	NA
rs32042922	65893356	1	Acadl	66830839	66863277	1	7.26e-22	cis	FALSE	LD_Chr_1_65505631_67985509	intergenic_variant	MODIFIER	NA
rs32745522	65933237	1	Acadl	66830839	66863277	1	7.26e-22	cis	FALSE	LD_Chr_1_65505631_67985509	downstream_gene_variant	MODIFIER	NA
rs3705367	66000391	1	Acadl	66830839	66863277	1	7.26e-22	cis	FALSE	LD_Chr_1_65505631_67985509	intergenic_variant	MODIFIER	NA
rs30224651	66044847	1	Acadl	66830839	66863277	1	7.26e-22	cis	FALSE	LD_Chr_1_65505631_67985509	intergenic_variant	MODIFIER	NA
rs30229057	66048107	1	Acadl	66830839	66863277	1	7.26e-22	cis	FALSE	LD_Chr_1_65505631_67985509	intergenic_variant	MODIFIER	NA
rs32347478	66197457	1	Acadl	66830839	66863277	1	7.26e-22	cis	FALSE	LD_Chr_1_65505631_67985509	non_coding_transcript_variant	MODIFIER	NA
rs30233869	66200608	1	Acadl	66830839	66863277	1	7.26e-22	cis	FALSE	LD_Chr_1_65505631_67985509	intron_variant	MODIFIER	NA
rs30238226	66256360	1	Acadl	66830839	66863277	1	7.26e-22	cis	FALSE	LD_Chr_1_65505631_67985509	intron_variant	MODIFIER	NA
rs3692269	66298800	1	Acadl	66830839	66863277	1	7.26e-22	cis	FALSE	LD_Chr_1_65505631_67985509	intron_variant	MODIFIER	NA
rs30230882	66136284	1	Acadl	66830839	66863277	1	7.26e-22	cis	FALSE	LD_Chr_1_65505631_67985509	intergenic_variant	MODIFIER	NA
rs30664044	66319545	1	Acadl	66830839	66863277	1	7.26e-22	cis	FALSE	LD_Chr_1_65505631_67985509	intron_variant	MODIFIER	NA
rs30274182	66372434	1	Acadl	66830839	66863277	1	7.26e-22	cis	FALSE	LD_Chr_1_65505631_67985509	intron_variant	MODIFIER	NA
rs30275145	66372464	1	Acadl	66830839	66863277	1	7.26e-22	cis	FALSE	LD_Chr_1_65505631_67985509	intron_variant	MODIFIER	NA
rs30279592	66406849	1	Acadl	66830839	66863277	1	7.26e-22	cis	FALSE	LD_Chr_1_65505631_67985509	intron_variant	MODIFIER	NA
rs30280548	66408474	1	Acadl	66830839	66863277	1	7.26e-22	cis	FALSE	LD_Chr_1_65505631_67985509	intron_variant	MODIFIER	NA
rs30287021	66526999	1	Acadl	66830839	66863277	1	7.26e-22	cis	FALSE	LD_Chr_1_65505631_67985509	intron_variant	MODIFIER	NA
rs30296800	66602433	1	Acadl	66830839	66863277	1	7.26e-22	cis	FALSE	LD_Chr_1_65505631_67985509	intron_variant	MODIFIER	NA
rs30286791	66637773	1	Acadl	66830839	66863277	1	7.26e-22	cis	FALSE	LD_Chr_1_65505631_67985509	intron_variant	MODIFIER	NA
rs30304067	66688778	1	Acadl	66830839	66863277	1	7.26e-22	cis	FALSE	LD_Chr_1_65505631_67985509	intron_variant	MODIFIER	NA
rs30304073	66688951	1	Acadl	66830839	66863277	1	7.26e-22	cis	FALSE	LD_Chr_1_65505631_67985509	downstream_gene_variant	MODIFIER	NA
rs30328630	66761538	1	Acadl	66830839	66863277	1	7.26e-22	cis	FALSE	LD_Chr_1_65505631_67985509	downstream_gene_variant	MODIFIER	NA
rs30321669	66772802	1	Acadl	66830839	66863277	1	7.26e-22	cis	FALSE	LD_Chr_1_65505631_67985509	intron_variant	MODIFIER	NA
rs4139447	66814875	1	Acadl	66830839	66863277	1	7.26e-22	cis	FALSE	LD_Chr_1_65505631_67985509	intron_variant	MODIFIER	NA
rs3689589	66814971	1	Acadl	66830839	66863277	1	7.26e-22	cis	FALSE	LD_Chr_1_65505631_67985509	intron_variant	MODIFIER	NA
rs3657619	66905704	1	Acadl	66830839	66863277	1	7.26e-22	cis	FALSE	LD_Chr_1_65505631_67985509	intergenic_variant	MODIFIER	NA
rs30426868	67574694	1	Acadl	66830839	66863277	1	7.26e-22	cis	FALSE	LD_Chr_1_65505631_67985509	intergenic_variant	MODIFIER	NA
rs3698088	67338318	1	Acadl	66830839	66863277	1	7.26e-22	cis	FALSE	LD_Chr_1_65505631_67985509	intergenic_variant	MODIFIER	NA
rs6196410	67516195	1	Acadl	66830839	66863277	1	7.26e-22	cis	FALSE	LD_Chr_1_65505631_67985509	intergenic_variant	MODIFIER	NA
rs3665163	67777023	1	Acadl	66830839	66863277	1	7.26e-22	cis	FALSE	LD_Chr_1_65505631_67985509	intergenic_variant	MODIFIER	NA
rs31053473	67788086	1	Acadl	66830839	66863277	1	7.26e-22	cis	FALSE	LD_Chr_1_65505631_67985509	upstream_gene_variant	MODIFIER	NA
rs3702149	67142244	1	Acadl	66830839	66863277	1	7.26e-22	cis	FALSE	LD_Chr_1_65505631_67985509	intron_variant	MODIFIER	NA
rs30386731	67208752	1	Acadl	66830839	66863277	1	7.26e-22	cis	FALSE	LD_Chr_1_65505631_67985509	intron_variant	MODIFIER	NA
rs30390303	67285632	1	Acadl	66830839	66863277	1	7.26e-22	cis	FALSE	LD_Chr_1_65505631_67985509	non_coding_transcript_variant	MODIFIER	NA
rs30391326	67285683	1	Acadl	66830839	66863277	1	7.26e-22	cis	FALSE	LD_Chr_1_65505631_67985509	non_coding_transcript_variant	MODIFIER	NA
rs3668976	67360694	1	Acadl	66830839	66863277	1	7.26e-22	cis	FALSE	LD_Chr_1_65505631_67985509	intergenic_variant	MODIFIER	NA
rs3656732	67397029	1	Acadl	66830839	66863277	1	7.26e-22	cis	FALSE	LD_Chr_1_65505631_67985509	intergenic_variant	MODIFIER	NA
rs3671156	67397099	1	Acadl	66830839	66863277	1	7.26e-22	cis	FALSE	LD_Chr_1_65505631_67985509	intergenic_variant	MODIFIER	NA
rs30423236	67444910	1	Acadl	66830839	66863277	1	7.26e-22	cis	FALSE	LD_Chr_1_65505631_67985509	intergenic_variant	MODIFIER	NA
rs30424345	67446388	1	Acadl	66830839	66863277	1	7.26e-22	cis	FALSE	LD_Chr_1_65505631_67985509	intergenic_variant	MODIFIER	NA
rs32606513	67474751	1	Acadl	66830839	66863277	1	7.26e-22	cis	FALSE	LD_Chr_1_65505631_67985509	intergenic_variant	MODIFIER	NA
rs31566704	67488306	1	Acadl	66830839	66863277	1	7.26e-22	cis	FALSE	LD_Chr_1_65505631_67985509	intergenic_variant	MODIFIER	NA
rs32649384	67633507	1	Acadl	66830839	66863277	1	7.26e-22	cis	FALSE	LD_Chr_1_65505631_67985509	intergenic_variant	MODIFIER	NA
rs30450793	67722259	1	Acadl	66830839	66863277	1	7.26e-22	cis	FALSE	LD_Chr_1_65505631_67985509	intergenic_variant	MODIFIER	NA
rs3704874	67723365	1	Acadl	66830839	66863277	1	7.26e-22	cis	FALSE	LD_Chr_1_65505631_67985509	intergenic_variant	MODIFIER	NA
rs32270143	66136728	1	Acadl	66830839	66863277	1	7.26e-22	cis	FALSE	LD_Chr_1_65505631_67985509	intergenic_variant	MODIFIER	NA
rs32336523	67003987	1	Acadl	66830839	66863277	1	7.26e-22	cis	FALSE	LD_Chr_1_65505631_67985509	intron_variant	MODIFIER	NA
rs31108756	65505631	1	Acadl	66830839	66863277	1	7.26e-22	cis	FALSE	NA	intergenic_variant	MODIFIER	NA
rs30242213	66284300	1	Acadl	66830839	66863277	1	7.26e-22	cis	FALSE	LD_Chr_1_65505631_67985509	intron_variant	MODIFIER	NA
rs30276441	66379081	1	Acadl	66830839	66863277	1	7.26e-22	cis	FALSE	LD_Chr_1_65505631_67985509	intron_variant	MODIFIER	NA
rs30253831	66354984	1	Acadl	66830839	66863277	1	7.26e-22	cis	FALSE	LD_Chr_1_65505631_67985509	intron_variant	MODIFIER	NA
rs30227483	66130362	1	Acadl	66830839	66863277	1	7.26e-22	cis	FALSE	LD_Chr_1_65505631_67985509	intergenic_variant	MODIFIER	NA
rs30230003	66135303	1	Acadl	66830839	66863277	1	7.26e-22	cis	FALSE	LD_Chr_1_65505631_67985509	intergenic_variant	MODIFIER	NA
rs30231609	66139742	1	Acadl	66830839	66863277	1	7.26e-22	cis	FALSE	LD_Chr_1_65505631_67985509	intergenic_variant	MODIFIER	NA
rs30237810	66157843	1	Acadl	66830839	66863277	1	7.26e-22	cis	FALSE	LD_Chr_1_65505631_67985509	intergenic_variant	MODIFIER	NA
rs30244010	66228544	1	Acadl	66830839	66863277	1	7.26e-22	cis	FALSE	LD_Chr_1_65505631_67985509	intron_variant	MODIFIER	NA
rs30242434	66244669	1	Acadl	66830839	66863277	1	7.26e-22	cis	FALSE	LD_Chr_1_65505631_67985509	intron_variant	MODIFIER	NA
rs30245168	66263250	1	Acadl	66830839	66863277	1	7.26e-22	cis	FALSE	LD_Chr_1_65505631_67985509	intron_variant	MODIFIER	NA
rs30245171	66263370	1	Acadl	66830839	66863277	1	7.26e-22	cis	FALSE	LD_Chr_1_65505631_67985509	intron_variant	MODIFIER	NA
rs30300143	66644056	1	Acadl	66830839	66863277	1	7.26e-22	cis	FALSE	LD_Chr_1_65505631_67985509	intron_variant	MODIFIER	NA
rs30301486	66676351	1	Acadl	66830839	66863277	1	7.26e-22	cis	FALSE	LD_Chr_1_65505631_67985509	intron_variant	MODIFIER	NA
rs30304927	66681090	1	Acadl	66830839	66863277	1	7.26e-22	cis	FALSE	LD_Chr_1_65505631_67985509	intron_variant	MODIFIER	NA
rs30306903	66691892	1	Acadl	66830839	66863277	1	7.26e-22	cis	FALSE	LD_Chr_1_65505631_67985509	intron_variant	MODIFIER	NA
rs30324399	66734046	1	Acadl	66830839	66863277	1	7.26e-22	cis	FALSE	LD_Chr_1_65505631_67985509	intron_variant	MODIFIER	NA
rs30322077	66749456	1	Acadl	66830839	66863277	1	7.26e-22	cis	FALSE	LD_Chr_1_65505631_67985509	intron_variant	MODIFIER	NA
rs30325142	66770768	1	Acadl	66830839	66863277	1	7.26e-22	cis	FALSE	LD_Chr_1_65505631_67985509	intron_variant	MODIFIER	NA
rs30325428	66778054	1	Acadl	66830839	66863277	1	7.26e-22	cis	FALSE	LD_Chr_1_65505631_67985509	synonymous_variant	LOW	NA
rs30329079	66809176	1	Acadl	66830839	66863277	1	7.26e-22	cis	FALSE	LD_Chr_1_65505631_67985509	upstream_gene_variant	MODIFIER	NA
rs30328700	66843392	1	Acadl	66830839	66863277	1	7.26e-22	cis	TRUE	LD_Chr_1_65505631_67985509	downstream_gene_variant	MODIFIER	NA
rs30329156	66847099	1	Acadl	66830839	66863277	1	7.26e-22	cis	TRUE	LD_Chr_1_65505631_67985509	downstream_gene_variant	MODIFIER	NA
rs30323156	66848174	1	Acadl	66830839	66863277	1	7.26e-22	cis	TRUE	LD_Chr_1_65505631_67985509	intron_variant	MODIFIER	NA
rs30322900	66887341	1	Acadl	66830839	66863277	1	7.26e-22	cis	FALSE	LD_Chr_1_65505631_67985509	intergenic_variant	MODIFIER	NA
rs30322902	66887371	1	Acadl	66830839	66863277	1	7.26e-22	cis	FALSE	LD_Chr_1_65505631_67985509	intergenic_variant	MODIFIER	NA
rs30328827	66917842	1	Acadl	66830839	66863277	1	7.26e-22	cis	FALSE	LD_Chr_1_65505631_67985509	intergenic_variant	MODIFIER	NA
rs32301364	65514213	1	Acadl	66830839	66863277	1	7.26e-22	cis	FALSE	LD_Chr_1_65505631_67985509	intergenic_variant	MODIFIER	NA
rs32614508	65515601	1	Acadl	66830839	66863277	1	7.26e-22	cis	FALSE	LD_Chr_1_65505631_67985509	intergenic_variant	MODIFIER	NA
rs31270365	65532759	1	Acadl	66830839	66863277	1	7.26e-22	cis	FALSE	LD_Chr_1_65505631_67985509	intergenic_variant	MODIFIER	NA
rs31372584	65633031	1	Acadl	66830839	66863277	1	7.26e-22	cis	FALSE	LD_Chr_1_65505631_67985509	intergenic_variant	MODIFIER	NA
rs32837583	65675399	1	Acadl	66830839	66863277	1	7.26e-22	cis	FALSE	LD_Chr_1_65505631_67985509	intergenic_variant	MODIFIER	NA
rs32834362	65742148	1	Acadl	66830839	66863277	1	7.26e-22	cis	FALSE	LD_Chr_1_65505631_67985509	intergenic_variant	MODIFIER	NA
rs32833595	65838598	1	Acadl	66830839	66863277	1	7.26e-22	cis	FALSE	LD_Chr_1_65505631_67985509	intergenic_variant	MODIFIER	NA
rs46553074	65856525	1	Acadl	66830839	66863277	1	7.26e-22	cis	FALSE	LD_Chr_1_65505631_67985509	intergenic_variant	MODIFIER	NA
rs46951096	65912285	1	Acadl	66830839	66863277	1	7.26e-22	cis	FALSE	LD_Chr_1_65505631_67985509	intergenic_variant	MODIFIER	NA
rs49447200	65914629	1	Acadl	66830839	66863277	1	7.26e-22	cis	FALSE	LD_Chr_1_65505631_67985509	intergenic_variant	MODIFIER	NA
rs51910862	65841609	1	Acadl	66830839	66863277	1	7.26e-22	cis	FALSE	LD_Chr_1_65505631_67985509	intergenic_variant	MODIFIER	NA
rs30228166	65981104	1	Acadl	66830839	66863277	1	7.26e-22	cis	FALSE	LD_Chr_1_65505631_67985509	intergenic_variant	MODIFIER	NA
rs30221275	65982194	1	Acadl	66830839	66863277	1	7.26e-22	cis	FALSE	LD_Chr_1_65505631_67985509	intergenic_variant	MODIFIER	NA
rs30221278	65982392	1	Acadl	66830839	66863277	1	7.26e-22	cis	FALSE	LD_Chr_1_65505631_67985509	intergenic_variant	MODIFIER	NA
rs30222164	65982486	1	Acadl	66830839	66863277	1	7.26e-22	cis	FALSE	LD_Chr_1_65505631_67985509	intergenic_variant	MODIFIER	NA
rs30214028	65933910	1	Acadl	66830839	66863277	1	7.26e-22	cis	FALSE	LD_Chr_1_65505631_67985509	intergenic_variant	MODIFIER	NA
rs30233694	66129862	1	Acadl	66830839	66863277	1	7.26e-22	cis	FALSE	LD_Chr_1_65505631_67985509	intergenic_variant	MODIFIER	NA
rs30273949	66384223	1	Acadl	66830839	66863277	1	7.26e-22	cis	FALSE	LD_Chr_1_65505631_67985509	intron_variant	MODIFIER	NA
rs30290298	66511752	1	Acadl	66830839	66863277	1	7.26e-22	cis	FALSE	LD_Chr_1_65505631_67985509	intron_variant	MODIFIER	NA
rs30284068	66593572	1	Acadl	66830839	66863277	1	7.26e-22	cis	FALSE	LD_Chr_1_65505631_67985509	intron_variant	MODIFIER	NA
rs30285183	66593819	1	Acadl	66830839	66863277	1	7.26e-22	cis	FALSE	LD_Chr_1_65505631_67985509	intron_variant	MODIFIER	NA
rs30296794	66602275	1	Acadl	66830839	66863277	1	7.26e-22	cis	FALSE	LD_Chr_1_65505631_67985509	intron_variant	MODIFIER	NA
rs30338035	66953958	1	Acadl	66830839	66863277	1	7.26e-22	cis	FALSE	LD_Chr_1_65505631_67985509	downstream_gene_variant	MODIFIER	NA
rs30337450	66960539	1	Acadl	66830839	66863277	1	7.26e-22	cis	FALSE	LD_Chr_1_65505631_67985509	intergenic_variant	MODIFIER	NA
rs3712639	66977232	1	Acadl	66830839	66863277	1	7.26e-22	cis	FALSE	LD_Chr_1_65505631_67985509	intergenic_variant	MODIFIER	NA
rs30338733	66978116	1	Acadl	66830839	66863277	1	7.26e-22	cis	FALSE	LD_Chr_1_65505631_67985509	intergenic_variant	MODIFIER	NA
rs30338409	66984285	1	Acadl	66830839	66863277	1	7.26e-22	cis	FALSE	LD_Chr_1_65505631_67985509	intergenic_variant	MODIFIER	NA
rs30334156	66921406	1	Acadl	66830839	66863277	1	7.26e-22	cis	FALSE	LD_Chr_1_65505631_67985509	downstream_gene_variant	MODIFIER	NA
rs30338305	66985608	1	Acadl	66830839	66863277	1	7.26e-22	cis	FALSE	LD_Chr_1_65505631_67985509	intergenic_variant	MODIFIER	NA
rs30350837	67062554	1	Acadl	66830839	66863277	1	7.26e-22	cis	FALSE	LD_Chr_1_65505631_67985509	intergenic_variant	MODIFIER	NA
rs3705250	67093537	1	Acadl	66830839	66863277	1	7.26e-22	cis	FALSE	LD_Chr_1_65505631_67985509	intergenic_variant	MODIFIER	NA
rs3705811	67093635	1	Acadl	66830839	66863277	1	7.26e-22	cis	FALSE	LD_Chr_1_65505631_67985509	intergenic_variant	MODIFIER	NA
rs30370639	67125928	1	Acadl	66830839	66863277	1	7.26e-22	cis	FALSE	LD_Chr_1_65505631_67985509	intron_variant	MODIFIER	NA
rs30372050	67126517	1	Acadl	66830839	66863277	1	7.26e-22	cis	FALSE	LD_Chr_1_65505631_67985509	intron_variant	MODIFIER	NA
rs30376539	67148158	1	Acadl	66830839	66863277	1	7.26e-22	cis	FALSE	LD_Chr_1_65505631_67985509	intron_variant	MODIFIER	NA
rs30375849	67149941	1	Acadl	66830839	66863277	1	7.26e-22	cis	FALSE	LD_Chr_1_65505631_67985509	intron_variant	MODIFIER	NA
rs30348496	67031799	1	Acadl	66830839	66863277	1	7.26e-22	cis	FALSE	LD_Chr_1_65505631_67985509	intron_variant	MODIFIER	NA
rs30350153	67032234	1	Acadl	66830839	66863277	1	7.26e-22	cis	FALSE	LD_Chr_1_65505631_67985509	intron_variant	MODIFIER	NA
rs30351001	67032441	1	Acadl	66830839	66863277	1	7.26e-22	cis	FALSE	LD_Chr_1_65505631_67985509	intron_variant	MODIFIER	NA
rs30385420	67224169	1	Acadl	66830839	66863277	1	7.26e-22	cis	FALSE	LD_Chr_1_65505631_67985509	intron_variant	MODIFIER	NA
rs30389742	67235541	1	Acadl	66830839	66863277	1	7.26e-22	cis	FALSE	LD_Chr_1_65505631_67985509	downstream_gene_variant	MODIFIER	NA
rs30388745	67261057	1	Acadl	66830839	66863277	1	7.26e-22	cis	FALSE	LD_Chr_1_65505631_67985509	non_coding_transcript_variant	MODIFIER	NA
rs30393542	67299263	1	Acadl	66830839	66863277	1	7.26e-22	cis	FALSE	LD_Chr_1_65505631_67985509	non_coding_transcript_variant	MODIFIER	NA
rs30406008	67390371	1	Acadl	66830839	66863277	1	7.26e-22	cis	FALSE	LD_Chr_1_65505631_67985509	intergenic_variant	MODIFIER	NA
rs30407338	67403122	1	Acadl	66830839	66863277	1	7.26e-22	cis	FALSE	LD_Chr_1_65505631_67985509	intergenic_variant	MODIFIER	NA
rs30419124	67457324	1	Acadl	66830839	66863277	1	7.26e-22	cis	FALSE	LD_Chr_1_65505631_67985509	intergenic_variant	MODIFIER	NA
rs30419336	67462084	1	Acadl	66830839	66863277	1	7.26e-22	cis	FALSE	LD_Chr_1_65505631_67985509	intergenic_variant	MODIFIER	NA
rs30421033	67462702	1	Acadl	66830839	66863277	1	7.26e-22	cis	FALSE	LD_Chr_1_65505631_67985509	intergenic_variant	MODIFIER	NA
rs30420744	67499694	1	Acadl	66830839	66863277	1	7.26e-22	cis	FALSE	LD_Chr_1_65505631_67985509	intergenic_variant	MODIFIER	NA
rs30421666	67500110	1	Acadl	66830839	66863277	1	7.26e-22	cis	FALSE	LD_Chr_1_65505631_67985509	intergenic_variant	MODIFIER	NA
rs30422713	67557995	1	Acadl	66830839	66863277	1	7.26e-22	cis	FALSE	LD_Chr_1_65505631_67985509	intergenic_variant	MODIFIER	NA
rs30425510	67558529	1	Acadl	66830839	66863277	1	7.26e-22	cis	FALSE	LD_Chr_1_65505631_67985509	intergenic_variant	MODIFIER	NA
rs30373315	67181980	1	Acadl	66830839	66863277	1	7.26e-22	cis	FALSE	LD_Chr_1_65505631_67985509	intron_variant	MODIFIER	NA
rs30376694	67195418	1	Acadl	66830839	66863277	1	7.26e-22	cis	FALSE	LD_Chr_1_65505631_67985509	intron_variant	MODIFIER	NA
rs30441160	67659910	1	Acadl	66830839	66863277	1	7.26e-22	cis	FALSE	LD_Chr_1_65505631_67985509	intergenic_variant	MODIFIER	NA
rs30448650	67664635	1	Acadl	66830839	66863277	1	7.26e-22	cis	FALSE	LD_Chr_1_65505631_67985509	intergenic_variant	MODIFIER	NA
rs30955262	67749123	1	Acadl	66830839	66863277	1	7.26e-22	cis	FALSE	LD_Chr_1_65505631_67985509	intergenic_variant	MODIFIER	NA
rs48431621	67759212	1	Acadl	66830839	66863277	1	7.26e-22	cis	FALSE	LD_Chr_1_65505631_67985509	intergenic_variant	MODIFIER	NA
rs27584155	676904255	4	Aldh4a1	677247741	677274565	4	7.64e-22	cis	FALSE	LD_Chr_4_676629220_677256778	intron_variant	MODIFIER	NA
rs27547458	676851450	4	Aldh4a1	677247741	677274565	4	7.64e-22	cis	FALSE	LD_Chr_4_676629220_677256778	non_coding_transcript_variant	MODIFIER	NA
rs27547456	676851483	4	Aldh4a1	677247741	677274565	4	7.64e-22	cis	FALSE	LD_Chr_4_676629220_677256778	non_coding_transcript_variant	MODIFIER	NA
rs27547452	676852072	4	Aldh4a1	677247741	677274565	4	7.64e-22	cis	FALSE	LD_Chr_4_676629220_677256778	non_coding_transcript_variant	MODIFIER	NA
rs37007886	2093166788	15	Mpst	2091778860	2091786457	15	7.88e-22	cis	FALSE	LD_Chr_15_2093113077_2093335325	synonymous_variant	LOW	NA
rs30281144	1376771484	9	Acy1	1376979874	1376985212	9	7.9e-22	cis	FALSE	LD_Chr_9_1376309766_1376953147	synonymous_variant	LOW	NA
rs29229477	1860811721	13	Cmya5	1861089274	1861193285	13	7.91e-22	cis	FALSE	LD_Chr_13_1860757122_1861913824	intron_variant	MODIFIER	NA
rs31606640	173463617	1	Mpz	171150711	171161130	1	8e-22	cis	FALSE	LD_Chr_1_173370140_173679184	downstream_gene_variant	MODIFIER	+
rs31320885	159284918	1	Prdx6	161240112	161251219	1	8.47e-22	cis	FALSE	LD_Chr_1_159137334_159432967	intron_variant	MODIFIER	NA
rs30750944	159286391	1	Prdx6	161240112	161251219	1	8.47e-22	cis	FALSE	LD_Chr_1_159137334_159432967	intron_variant	MODIFIER	NA
rs31318671	159339484	1	Prdx6	161240112	161251219	1	8.47e-22	cis	FALSE	LD_Chr_1_159137334_159432967	upstream_gene_variant	MODIFIER	NA
rs31317783	159341158	1	Prdx6	161240112	161251219	1	8.47e-22	cis	FALSE	LD_Chr_1_159137334_159432967	upstream_gene_variant	MODIFIER	NA
rs31320790	159211793	1	Prdx6	161240112	161251219	1	8.47e-22	cis	FALSE	LD_Chr_1_159137334_159432967	upstream_gene_variant	MODIFIER	NA
rs30868620	2447624260	19	Arl3	2447844916	2447886892	19	8.93e-22	cis	FALSE	NA	non_coding_transcript_variant	MODIFIER	NA
rs33473102	2240744449	17	Fahd1	2240472789	2240474261	17	9.09e-22	cis	FALSE	LD_Chr_17_2240361950_2241076094	upstream_gene_variant	MODIFIER	NA
rs33052145	2240877743	17	Fahd1	2240472789	2240474261	17	9.09e-22	cis	FALSE	LD_Chr_17_2240361950_2241076094	non_coding_transcript_variant	MODIFIER	NA
rs33776160	2241025467	17	Fahd1	2240472789	2240474261	17	9.09e-22	cis	FALSE	LD_Chr_17_2240361950_2241076094	intron_variant	MODIFIER	NA
rs33775031	2241011872	17	Fahd1	2240472789	2240474261	17	9.09e-22	cis	FALSE	LD_Chr_17_2240361950_2241076094	intron_variant	MODIFIER	NA
rs29518622	2240778060	17	Fahd1	2240472789	2240474261	17	9.09e-22	cis	FALSE	LD_Chr_17_2240361950_2241076094	intron_variant	MODIFIER	NA
rs33495454	2240789823	17	Fahd1	2240472789	2240474261	17	9.1e-22	cis	FALSE	LD_Chr_17_2240361950_2241076094	downstream_gene_variant	MODIFIER	NA
rs30408951	2448230571	19	Sec31b	2445830764	2445859671	19	9.19e-22	cis	FALSE	LD_Chr_19_2447624260_2448359008	NMD_transcript_variant	MODIFIER	NA
rs33228894	2243607741	17	Glo1	2246216763	2246236556	17	9.58e-22	cis	FALSE	LD_Chr_17_2243607426_2243666528	intron_variant	MODIFIER	NA
rs32455756	67762530	1	Acadl	66830839	66863277	1	9.9e-22	cis	FALSE	LD_Chr_1_65505631_67985509	intergenic_variant	MODIFIER	NA
rs27545104	676273737	4	Aldh4a1	677247741	677274565	4	1.02e-21	cis	FALSE	LD_Chr_4_676163577_676576704	intergenic_variant	MODIFIER	NA
rs33069221	1751847707	12	Serpina1a	1751773128	1751783101	12	1.02e-21	cis	FALSE	LD_Chr_12_1750708000_1751856496	upstream_gene_variant	MODIFIER	NA
rs33123597	2243569217	17	Glo1	2246216763	2246236556	17	1.04e-21	cis	FALSE	LD_Chr_17_2243514059_2243580633	intron_variant	MODIFIER	NA
rs45938776	2241292136	17	Fahd1	2240472789	2240474261	17	1.05e-21	cis	FALSE	LD_Chr_17_2241173419_2241607776	intergenic_variant	MODIFIER	NA
rs49602988	2245390342	17	Glo1	2246216763	2246236556	17	1.09e-21	cis	FALSE	LD_Chr_17_2245338581_2245416437	intergenic_variant	MODIFIER	NA
rs30435755	1177097457	8	Gsr	1174798203	1174843843	8	1.13e-21	cis	FALSE	LD_Chr_8_1172961821_1182556240	intergenic_variant	MODIFIER	NA
rs31284903	174912821	1	Mpz	171150711	171161130	1	1.13e-21	cis	FALSE	LD_Chr_1_174878069_174919689	intron_variant	MODIFIER	+
rs33785717	2240553416	17	Fahd1	2240472789	2240474261	17	1.13e-21	cis	FALSE	LD_Chr_17_2240361950_2241076094	intron_variant	MODIFIER	NA
rs31561281	172444585	1	Mpz	171150711	171161130	1	1.13e-21	cis	FALSE	LD_Chr_1_172433015_172487253	intergenic_variant	MODIFIER	+
rs33790297	2243230849	17	Glo1	2246216763	2246236556	17	1.14e-21	cis	FALSE	LD_Chr_17_2243131062_2243286519	intron_variant	MODIFIER	NA
rs29634968	1803433960	13	Psmg3	833956583	833959876	5	1.24e-21	trans	FALSE	LD_Chr_13_1799628853_1803697190	intergenic_variant	MODIFIER	NA
rs30230950	66158651	1	Acadl	66830839	66863277	1	1.25e-21	cis	FALSE	LD_Chr_1_65505631_67985509	intergenic_variant	MODIFIER	NA
rs30571932	66004184	1	Acadl	66830839	66863277	1	1.25e-21	cis	FALSE	LD_Chr_1_65505631_67985509	intergenic_variant	MODIFIER	NA
rs47108158	67744503	1	Acadl	66830839	66863277	1	1.25e-21	cis	FALSE	LD_Chr_1_65505631_67985509	intergenic_variant	MODIFIER	NA
rs30290295	66511701	1	Acadl	66830839	66863277	1	1.25e-21	cis	FALSE	LD_Chr_1_65505631_67985509	intron_variant	MODIFIER	NA
rs33440636	2241628346	17	Fahd1	2240472789	2240474261	17	1.27e-21	cis	FALSE	LD_Chr_17_2241617257_2241664073	intron_variant	MODIFIER	NA
rs32167076	134484611	1	Ppp1r12b	134754658	134955942	1	1.33e-21	cis	FALSE	LD_Chr_1_134472588_134552878	intron_variant	MODIFIER	NA
rs31531675	171979305	1	Mpz	171150711	171161130	1	1.36e-21	cis	FALSE	LD_Chr_1_171438247_172381513	intergenic_variant	MODIFIER	+
rs32010093	93623370	1	D2hgdh	93824909	93852348	1	1.4e-21	cis	FALSE	LD_Chr_1_93614692_93673177	downstream_gene_variant	MODIFIER	NA
rs30357008	93614692	1	D2hgdh	93824909	93852348	1	1.4e-21	cis	FALSE	NA	intron_variant	MODIFIER	NA
rs33553641	2243630656	17	Glo1	2246216763	2246236556	17	1.4e-21	cis	FALSE	LD_Chr_17_2243607426_2243666528	upstream_gene_variant	MODIFIER	NA
rs6322485	63257134	1	Acadl	66830839	66863277	1	1.45e-21	cis	FALSE	LD_Chr_1_62363021_63806080	intergenic_variant	MODIFIER	NA
rs46933340	2239647980	17	Fahd1	2240472789	2240474261	17	1.52e-21	cis	FALSE	LD_Chr_17_2239582522_2239921491	non_coding_transcript_exon_variant	MODIFIER	NA
rs39297675	135658387	1	Ppp1r12b	134754658	134955942	1	1.58e-21	cis	FALSE	LD_Chr_1_135328566_137777833	non_coding_transcript_variant	MODIFIER	NA
rs38143319	135658472	1	Ppp1r12b	134754658	134955942	1	1.6e-21	cis	FALSE	LD_Chr_1_135328566_137777833	non_coding_transcript_variant	MODIFIER	NA
rs51299929	135705677	1	Ppp1r12b	134754658	134955942	1	1.6e-21	cis	FALSE	LD_Chr_1_135328566_137777833	intergenic_variant	MODIFIER	NA
rs36827395	135355655	1	Ppp1r12b	134754658	134955942	1	1.6e-21	cis	FALSE	LD_Chr_1_135328566_137777833	upstream_gene_variant	MODIFIER	NA
rs51027386	2245112495	17	Glo1	2246216763	2246236556	17	1.64e-21	cis	FALSE	LD_Chr_17_2245111060_2245112788	upstream_gene_variant	MODIFIER	NA
rs33440803	2247090189	17	Glo1	2246216763	2246236556	17	1.65e-21	cis	FALSE	NA	non_coding_transcript_variant	MODIFIER	NA
rs33096255	2247041656	17	Glo1	2246216763	2246236556	17	1.65e-21	cis	FALSE	LD_Chr_17_2247033532_2247090189	intron_variant	MODIFIER	NA
rs32525442	175421197	1	Mpz	171150711	171161130	1	1.66e-21	cis	FALSE	LD_Chr_1_175054333_175440535	intron_variant	MODIFIER	+
rs30870380	134495313	1	Ppp1r12b	134754658	134955942	1	1.71e-21	cis	FALSE	LD_Chr_1_134472588_134552878	downstream_gene_variant	MODIFIER	NA
rs31612847	173338628	1	Mpz	171150711	171161130	1	1.73e-21	cis	FALSE	LD_Chr_1_172937148_173340126	downstream_gene_variant	MODIFIER	+
rs31612132	173339174	1	Mpz	171150711	171161130	1	1.73e-21	cis	FALSE	LD_Chr_1_172937148_173340126	intron_variant	MODIFIER	+
rs31546960	173346309	1	Mpz	171150711	171161130	1	1.73e-21	cis	FALSE	LD_Chr_1_173342829_173369615	upstream_gene_variant	MODIFIER	+
rs31608643	173351504	1	Mpz	171150711	171161130	1	1.73e-21	cis	FALSE	LD_Chr_1_173342829_173369615	non_coding_transcript_variant	MODIFIER	+
rs31608163	173370140	1	Mpz	171150711	171161130	1	1.73e-21	cis	FALSE	NA	upstream_gene_variant	MODIFIER	+
rs31614046	173289497	1	Mpz	171150711	171161130	1	1.73e-21	cis	FALSE	LD_Chr_1_172937148_173340126	intergenic_variant	MODIFIER	+
rs31618630	173213504	1	Mpz	171150711	171161130	1	1.73e-21	cis	FALSE	LD_Chr_1_172937148_173340126	intron_variant	MODIFIER	+
rs31614716	173317348	1	Mpz	171150711	171161130	1	1.73e-21	cis	FALSE	LD_Chr_1_172937148_173340126	intergenic_variant	MODIFIER	+
rs31557294	172680923	1	Mpz	171150711	171161130	1	1.73e-21	cis	FALSE	LD_Chr_1_172580781_172707310	downstream_gene_variant	MODIFIER	+
rs31555835	172687914	1	Mpz	171150711	171161130	1	1.73e-21	cis	FALSE	LD_Chr_1_172580781_172707310	upstream_gene_variant	MODIFIER	+
rs31557939	172706981	1	Mpz	171150711	171161130	1	1.73e-21	cis	FALSE	LD_Chr_1_172580781_172707310	non_coding_transcript_variant	MODIFIER	+
rs31556443	172582700	1	Mpz	171150711	171161130	1	1.73e-21	cis	FALSE	LD_Chr_1_172580781_172707310	intron_variant	MODIFIER	+
rs31562315	172603177	1	Mpz	171150711	171161130	1	1.73e-21	cis	FALSE	LD_Chr_1_172580781_172707310	upstream_gene_variant	MODIFIER	+
rs31939401	172739227	1	Mpz	171150711	171161130	1	1.73e-21	cis	FALSE	LD_Chr_1_172711883_172751392	non_coding_transcript_variant	MODIFIER	+
rs45957169	172753081	1	Mpz	171150711	171161130	1	1.73e-21	cis	FALSE	NA	non_coding_transcript_variant	MODIFIER	+
rs30845868	172823941	1	Mpz	171150711	171161130	1	1.73e-21	cis	FALSE	LD_Chr_1_172753081_172832045	non_coding_transcript_variant	MODIFIER	+
rs30855445	172865246	1	Mpz	171150711	171161130	1	1.73e-21	cis	FALSE	NA	intergenic_variant	MODIFIER	+
rs49220419	172886138	1	Mpz	171150711	171161130	1	1.73e-21	cis	FALSE	LD_Chr_1_172867505_172902741	intergenic_variant	MODIFIER	+
rs47040523	172894298	1	Mpz	171150711	171161130	1	1.73e-21	cis	FALSE	LD_Chr_1_172867505_172902741	synonymous_variant	LOW	+
rs51586948	172956255	1	Mpz	171150711	171161130	1	1.73e-21	cis	FALSE	LD_Chr_1_172937148_173340126	5_prime_UTR_variant	MODIFIER	+
rs31633280	173039759	1	Mpz	171150711	171161130	1	1.73e-21	cis	FALSE	LD_Chr_1_172937148_173340126	intergenic_variant	MODIFIER	+
rs31632471	173040888	1	Mpz	171150711	171161130	1	1.73e-21	cis	FALSE	LD_Chr_1_172937148_173340126	intergenic_variant	MODIFIER	+
rs31629720	173057517	1	Mpz	171150711	171161130	1	1.73e-21	cis	FALSE	LD_Chr_1_172937148_173340126	upstream_gene_variant	MODIFIER	+
rs31519644	172957630	1	Mpz	171150711	171161130	1	1.73e-21	cis	FALSE	LD_Chr_1_172937148_173340126	synonymous_variant	LOW	+
rs31622044	173183633	1	Mpz	171150711	171161130	1	1.73e-21	cis	FALSE	LD_Chr_1_172937148_173340126	missense_variant	MODERATE	+
rs31619244	173205930	1	Mpz	171150711	171161130	1	1.73e-21	cis	FALSE	LD_Chr_1_172937148_173340126	3_prime_UTR_variant	MODIFIER	+
rs31617182	173206689	1	Mpz	171150711	171161130	1	1.73e-21	cis	FALSE	LD_Chr_1_172937148_173340126	downstream_gene_variant	MODIFIER	+
rs32392252	173072867	1	Mpz	171150711	171161130	1	1.73e-21	cis	FALSE	LD_Chr_1_172937148_173340126	upstream_gene_variant	MODIFIER	+
rs32567311	173252655	1	Mpz	171150711	171161130	1	1.73e-21	cis	FALSE	LD_Chr_1_172937148_173340126	intergenic_variant	MODIFIER	+
rs32091929	173050280	1	Mpz	171150711	171161130	1	1.73e-21	cis	FALSE	LD_Chr_1_172937148_173340126	downstream_gene_variant	MODIFIER	+
rs31559537	172624575	1	Mpz	171150711	171161130	1	1.73e-21	cis	FALSE	LD_Chr_1_172580781_172707310	intergenic_variant	MODIFIER	+
rs31558438	172663616	1	Mpz	171150711	171161130	1	1.73e-21	cis	FALSE	LD_Chr_1_172580781_172707310	intergenic_variant	MODIFIER	+
rs50905674	172778247	1	Mpz	171150711	171161130	1	1.73e-21	cis	FALSE	LD_Chr_1_172753081_172832045	non_coding_transcript_variant	MODIFIER	+
rs32773514	172789545	1	Mpz	171150711	171161130	1	1.73e-21	cis	FALSE	LD_Chr_1_172753081_172832045	non_coding_transcript_variant	MODIFIER	+
rs31524735	2091587937	15	Mpst	2091778860	2091786457	15	1.75e-21	cis	FALSE	LD_Chr_15_2091454134_2091782818	intergenic_variant	MODIFIER	NA
rs31524736	2091588037	15	Mpst	2091778860	2091786457	15	1.75e-21	cis	FALSE	LD_Chr_15_2091454134_2091782818	intergenic_variant	MODIFIER	NA
rs31524737	2091588410	15	Mpst	2091778860	2091786457	15	1.75e-21	cis	FALSE	LD_Chr_15_2091454134_2091782818	intergenic_variant	MODIFIER	NA
rs31526237	2091621331	15	Mpst	2091778860	2091786457	15	1.75e-21	cis	FALSE	LD_Chr_15_2091454134_2091782818	upstream_gene_variant	MODIFIER	NA
rs31520355	2091647711	15	Mpst	2091778860	2091786457	15	1.75e-21	cis	FALSE	LD_Chr_15_2091454134_2091782818	intergenic_variant	MODIFIER	NA
rs32839315	65675112	1	Acadl	66830839	66863277	1	1.76e-21	cis	FALSE	LD_Chr_1_65505631_67985509	intergenic_variant	MODIFIER	NA
rs48959551	2241913980	17	Fahd1	2240472789	2240474261	17	1.81e-21	cis	FALSE	LD_Chr_17_2241846929_2242047278	downstream_gene_variant	MODIFIER	NA
rs30836542	135174138	1	Ppp1r12b	134754658	134955942	1	1.87e-21	cis	FALSE	LD_Chr_1_134653566_135312467	intergenic_variant	MODIFIER	NA
rs6361015	2300369305	17	Cox7a2l	2299125815	2299141227	17	1.9e-21	cis	FALSE	LD_Chr_17_2300353539_2300417999	NMD_transcript_variant	MODIFIER	NA
rs46473530	2300501404	17	Cox7a2l	2299125815	2299141227	17	1.9e-21	cis	FALSE	LD_Chr_17_2300418349_2300557875	intergenic_variant	MODIFIER	NA
rs46755632	2300557575	17	Cox7a2l	2299125815	2299141227	17	1.9e-21	cis	FALSE	LD_Chr_17_2300418349_2300557875	non_coding_transcript_variant	MODIFIER	NA
rs33680245	2300329147	17	Cox7a2l	2299125815	2299141227	17	1.9e-21	cis	FALSE	LD_Chr_17_2299364879_2300346057	downstream_gene_variant	MODIFIER	NA
rs50059699	2300557513	17	Cox7a2l	2299125815	2299141227	17	1.9e-21	cis	FALSE	LD_Chr_17_2300418349_2300557875	non_coding_transcript_variant	MODIFIER	NA
rs49318725	2300557875	17	Cox7a2l	2299125815	2299141227	17	1.9e-21	cis	FALSE	NA	non_coding_transcript_variant	MODIFIER	NA
rs30261727	66328761	1	Acadl	66830839	66863277	1	1.93e-21	cis	FALSE	LD_Chr_1_65505631_67985509	non_coding_transcript_variant	MODIFIER	NA
rs33791504	2243120194	17	Glo1	2246216763	2246236556	17	2.1e-21	cis	FALSE	NA	NMD_transcript_variant	MODIFIER	NA
rs33661816	2243428579	17	Glo1	2246216763	2246236556	17	2.1e-21	cis	FALSE	LD_Chr_17_2243398647_2243507344	non_coding_transcript_variant	MODIFIER	NA
rs33712901	2243550591	17	Glo1	2246216763	2246236556	17	2.1e-21	cis	FALSE	LD_Chr_17_2243514059_2243580633	intron_variant	MODIFIER	NA
rs33791155	2243398647	17	Glo1	2246216763	2246236556	17	2.1e-21	cis	FALSE	NA	intron_variant	MODIFIER	NA
rs33320124	2243701842	17	Glo1	2246216763	2246236556	17	2.1e-21	cis	FALSE	LD_Chr_17_2243666558_2243702752	intron_variant	MODIFIER	NA
rs33788532	2243514059	17	Glo1	2246216763	2246236556	17	2.1e-21	cis	FALSE	NA	synonymous_variant	LOW	NA
rs33150672	2243296620	17	Glo1	2246216763	2246236556	17	2.1e-21	cis	FALSE	NA	intron_variant	MODIFIER	NA
rs32832632	65838702	1	Acadl	66830839	66863277	1	2.12e-21	cis	FALSE	LD_Chr_1_65505631_67985509	intergenic_variant	MODIFIER	NA
rs3690545	174202545	1	Mpz	171150711	171161130	1	2.38e-21	cis	FALSE	LD_Chr_1_174149042_174219722	intron_variant	MODIFIER	+
rs33519355	2241617257	17	Fahd1	2240472789	2240474261	17	2.52e-21	cis	FALSE	NA	intron_variant	MODIFIER	NA
rs51768838	174847781	1	Mpz	171150711	171161130	1	2.55e-21	cis	FALSE	LD_Chr_1_174676808_174861038	intron_variant	MODIFIER	+
rs32423722	38890945	1	Pdcl3	38985608	38997238	1	2.57e-21	cis	FALSE	LD_Chr_1_38760847_39017100	NMD_transcript_variant	MODIFIER	NA
rs33092045	39005858	1	Pdcl3	38985608	38997238	1	2.57e-21	cis	FALSE	LD_Chr_1_38760847_39017100	intergenic_variant	MODIFIER	NA
rs37536718	2446513794	19	Arl3	2447844916	2447886892	19	2.59e-21	cis	FALSE	LD_Chr_19_2446469995_2447089406	intergenic_variant	MODIFIER	NA
rs30605426	2446526257	19	Arl3	2447844916	2447886892	19	2.59e-21	cis	FALSE	LD_Chr_19_2446469995_2447089406	intergenic_variant	MODIFIER	NA
rs13480399	1376831818	9	Acy1	1376979874	1376985212	9	2.69e-21	cis	FALSE	LD_Chr_9_1376309766_1376953147	missense_variant	MODERATE	NA
rs30225276	66129918	1	Acadl	66830839	66863277	1	2.69e-21	cis	FALSE	LD_Chr_1_65505631_67985509	intergenic_variant	MODIFIER	NA
rs30297732	66602657	1	Acadl	66830839	66863277	1	2.69e-21	cis	FALSE	LD_Chr_1_65505631_67985509	intron_variant	MODIFIER	NA
rs30847303	134767929	1	Ppp1r12b	134754658	134955942	1	2.72e-21	cis	TRUE	LD_Chr_1_134653566_135312467	intron_variant	MODIFIER	NA
rs13476237	171701395	1	Mpz	171150711	171161130	1	3.02e-21	cis	FALSE	LD_Chr_1_171438247_172381513	intron_variant	MODIFIER	+
rs50424806	175049013	1	Mpz	171150711	171161130	1	3.04e-21	cis	FALSE	NA	intergenic_variant	MODIFIER	+
rs3720749	2243507344	17	Glo1	2246216763	2246236556	17	3.14e-21	cis	FALSE	NA	intron_variant	MODIFIER	NA
rs32528115	175349817	1	Mpz	171150711	171161130	1	3.22e-21	cis	FALSE	LD_Chr_1_175054333_175440535	intron_variant	MODIFIER	+
rs36371102	2448359982	19	Arl3	2447844916	2447886892	19	3.38e-21	cis	FALSE	LD_Chr_19_2448359583_2448364956	intron_variant	MODIFIER	NA
rs6206809	2448359008	19	Arl3	2447844916	2447886892	19	3.38e-21	cis	FALSE	NA	non_coding_transcript_variant	MODIFIER	NA
rs38498027	2448460501	19	Arl3	2447844916	2447886892	19	3.38e-21	cis	FALSE	LD_Chr_19_2448432215_2448533380	downstream_gene_variant	MODIFIER	NA
rs30285184	66565827	1	Acadl	66830839	66863277	1	3.39e-21	cis	FALSE	LD_Chr_1_65505631_67985509	intron_variant	MODIFIER	NA
rs3692410	66298872	1	Acadl	66830839	66863277	1	3.39e-21	cis	FALSE	LD_Chr_1_65505631_67985509	intron_variant	MODIFIER	NA
rs31728684	66302450	1	Acadl	66830839	66863277	1	3.39e-21	cis	FALSE	LD_Chr_1_65505631_67985509	intron_variant	MODIFIER	NA
rs32839046	65615912	1	Acadl	66830839	66863277	1	3.39e-21	cis	FALSE	LD_Chr_1_65505631_67985509	intergenic_variant	MODIFIER	NA
rs30441157	67659687	1	Acadl	66830839	66863277	1	3.39e-21	cis	FALSE	LD_Chr_1_65505631_67985509	intergenic_variant	MODIFIER	NA
rs30393495	67307069	1	Acadl	66830839	66863277	1	3.39e-21	cis	FALSE	LD_Chr_1_65505631_67985509	non_coding_transcript_variant	MODIFIER	NA
rs30268168	66351872	1	Acadl	66830839	66863277	1	3.39e-21	cis	FALSE	LD_Chr_1_65505631_67985509	non_coding_transcript_variant	MODIFIER	NA
rs30350265	67021771	1	Acadl	66830839	66863277	1	3.39e-21	cis	FALSE	LD_Chr_1_65505631_67985509	upstream_gene_variant	MODIFIER	NA
rs30337172	66953840	1	Acadl	66830839	66863277	1	3.39e-21	cis	FALSE	LD_Chr_1_65505631_67985509	upstream_gene_variant	MODIFIER	NA
rs30435591	67586987	1	Acadl	66830839	66863277	1	3.39e-21	cis	FALSE	LD_Chr_1_65505631_67985509	non_coding_transcript_exon_variant	MODIFIER	NA
rs4222543	93622090	1	D2hgdh	93824909	93852348	1	3.4e-21	cis	FALSE	LD_Chr_1_93614692_93673177	downstream_gene_variant	MODIFIER	NA
rs30861324	134661480	1	Ppp1r12b	134754658	134955942	1	3.55e-21	cis	FALSE	LD_Chr_1_134653566_135312467	intron_variant	MODIFIER	NA
rs3664806	134653305	1	Ppp1r12b	134754658	134955942	1	3.58e-21	cis	FALSE	NA	intron_variant	MODIFIER	NA
rs6374954	601000671	4	Orm2	600987324	600990753	4	3.58e-21	cis	FALSE	LD_Chr_4_600822301_601036700	intron_variant	MODIFIER	NA
rs31604245	173457503	1	Mpz	171150711	171161130	1	3.62e-21	cis	FALSE	LD_Chr_1_173370140_173679184	intron_variant	MODIFIER	+
rs33467085	2242258433	17	Fahd1	2240472789	2240474261	17	3.69e-21	cis	FALSE	NA	intron_variant	MODIFIER	NA
rs33779541	2240533739	17	Fahd1	2240472789	2240474261	17	3.82e-21	cis	FALSE	LD_Chr_17_2240361950_2241076094	upstream_gene_variant	MODIFIER	NA
rs48207246	2246825412	17	Glo1	2246216763	2246236556	17	3.85e-21	cis	FALSE	NA	upstream_gene_variant	MODIFIER	NA
rs29520420	2244057175	17	Glo1	2246216763	2246236556	17	3.89e-21	cis	FALSE	NA	non_coding_transcript_variant	MODIFIER	NA
rs30432637	67579383	1	Acadl	66830839	66863277	1	3.9e-21	cis	FALSE	LD_Chr_1_65505631_67985509	intergenic_variant	MODIFIER	NA
rs30406950	67390530	1	Acadl	66830839	66863277	1	3.9e-21	cis	FALSE	LD_Chr_1_65505631_67985509	intergenic_variant	MODIFIER	NA
rs30268165	66351846	1	Acadl	66830839	66863277	1	3.9e-21	cis	FALSE	LD_Chr_1_65505631_67985509	intron_variant	MODIFIER	NA
rs30223816	66043902	1	Acadl	66830839	66863277	1	3.9e-21	cis	FALSE	LD_Chr_1_65505631_67985509	intergenic_variant	MODIFIER	NA
rs32839976	65726057	1	Acadl	66830839	66863277	1	3.9e-21	cis	FALSE	LD_Chr_1_65505631_67985509	intergenic_variant	MODIFIER	NA
rs30890762	2445694846	19	Arl3	2447844916	2447886892	19	3.91e-21	cis	FALSE	LD_Chr_19_2445693208_2446246532	intergenic_variant	MODIFIER	NA
rs46876966	2244789529	17	Glo1	2246216763	2246236556	17	3.97e-21	cis	FALSE	LD_Chr_17_2244735426_2244870049	non_coding_transcript_variant	MODIFIER	NA
rs31610723	173451285	1	Mpz	171150711	171161130	1	4.03e-21	cis	FALSE	LD_Chr_1_173370140_173679184	upstream_gene_variant	MODIFIER	+
rs31605516	173414034	1	Mpz	171150711	171161130	1	4.03e-21	cis	FALSE	LD_Chr_1_173370140_173679184	intron_variant	MODIFIER	+
rs30656886	2446770241	19	Arl3	2447844916	2447886892	19	4.18e-21	cis	FALSE	LD_Chr_19_2446469995_2447089406	intron_variant	MODIFIER	NA
rs30352540	1176587755	8	Gsr	1174798203	1174843843	8	4.21e-21	cis	FALSE	LD_Chr_8_1172961821_1182556240	non_coding_transcript_variant	MODIFIER	NA
rs30352309	1176600322	8	Gsr	1174798203	1174843843	8	4.21e-21	cis	FALSE	LD_Chr_8_1172961821_1182556240	intergenic_variant	MODIFIER	NA
rs30371656	1176679331	8	Gsr	1174798203	1174843843	8	4.21e-21	cis	FALSE	LD_Chr_8_1172961821_1182556240	intergenic_variant	MODIFIER	NA
rs3672048	1176893064	8	Gsr	1174798203	1174843843	8	4.21e-21	cis	FALSE	LD_Chr_8_1172961821_1182556240	upstream_gene_variant	MODIFIER	NA
rs30403040	1176904904	8	Gsr	1174798203	1174843843	8	4.21e-21	cis	FALSE	LD_Chr_8_1172961821_1182556240	downstream_gene_variant	MODIFIER	NA
rs30403043	1176904946	8	Gsr	1174798203	1174843843	8	4.21e-21	cis	FALSE	LD_Chr_8_1172961821_1182556240	downstream_gene_variant	MODIFIER	NA
rs30402011	1176924974	8	Gsr	1174798203	1174843843	8	4.21e-21	cis	FALSE	LD_Chr_8_1172961821_1182556240	intron_variant	MODIFIER	NA
rs30413359	1176934144	8	Gsr	1174798203	1174843843	8	4.21e-21	cis	FALSE	LD_Chr_8_1172961821_1182556240	intron_variant	MODIFIER	NA
rs30417083	1176952775	8	Gsr	1174798203	1174843843	8	4.21e-21	cis	FALSE	LD_Chr_8_1172961821_1182556240	synonymous_variant	LOW	NA
rs30375707	1176750788	8	Gsr	1174798203	1174843843	8	4.21e-21	cis	FALSE	LD_Chr_8_1172961821_1182556240	intron_variant	MODIFIER	NA
rs30375713	1176750897	8	Gsr	1174798203	1174843843	8	4.21e-21	cis	FALSE	LD_Chr_8_1172961821_1182556240	intron_variant	MODIFIER	NA
rs30374384	1176753858	8	Gsr	1174798203	1174843843	8	4.21e-21	cis	FALSE	LD_Chr_8_1172961821_1182556240	intron_variant	MODIFIER	NA
rs30385328	1176801347	8	Gsr	1174798203	1174843843	8	4.21e-21	cis	FALSE	LD_Chr_8_1172961821_1182556240	intron_variant	MODIFIER	NA
rs30424503	1176994553	8	Gsr	1174798203	1174843843	8	4.21e-21	cis	FALSE	LD_Chr_8_1172961821_1182556240	intergenic_variant	MODIFIER	NA
rs30427561	1177015376	8	Gsr	1174798203	1174843843	8	4.21e-21	cis	FALSE	LD_Chr_8_1172961821_1182556240	non_coding_transcript_variant	MODIFIER	NA
rs30428474	1177015388	8	Gsr	1174798203	1174843843	8	4.21e-21	cis	FALSE	LD_Chr_8_1172961821_1182556240	non_coding_transcript_variant	MODIFIER	NA
rs30379491	1176787390	8	Gsr	1174798203	1174843843	8	4.21e-21	cis	FALSE	LD_Chr_8_1172961821_1182556240	intron_variant	MODIFIER	NA
rs30380370	1176787512	8	Gsr	1174798203	1174843843	8	4.21e-21	cis	FALSE	LD_Chr_8_1172961821_1182556240	non_coding_transcript_variant	MODIFIER	NA
rs30403655	1176918971	8	Gsr	1174798203	1174843843	8	4.21e-21	cis	FALSE	LD_Chr_8_1172961821_1182556240	intron_variant	MODIFIER	NA
rs30427040	1177010300	8	Gsr	1174798203	1174843843	8	4.21e-21	cis	FALSE	LD_Chr_8_1172961821_1182556240	non_coding_transcript_exon_variant	MODIFIER	NA
rs30235711	1174859051	8	Gsr	1174798203	1174843843	8	4.35e-21	cis	FALSE	LD_Chr_8_1172961821_1182556240	intergenic_variant	MODIFIER	NA
rs33687582	2242621244	17	Fahd1	2240472789	2240474261	17	4.4e-21	cis	FALSE	LD_Chr_17_2242512091_2242624855	NMD_transcript_variant	MODIFIER	NA
rs27863952	597553448	4	Alad	600134044	600144793	4	4.41e-21	cis	FALSE	LD_Chr_4_597420328_600821767	intergenic_variant	MODIFIER	NA
rs45933077	173802089	1	Mpz	171150711	171161130	1	4.43e-21	cis	FALSE	LD_Chr_1_173743163_174074570	NA	NA	+
rs33793479	173971432	1	Mpz	171150711	171161130	1	4.43e-21	cis	FALSE	LD_Chr_1_173743163_174074570	missense_variant	MODERATE	+
rs33792181	174037671	1	Mpz	171150711	171161130	1	4.43e-21	cis	FALSE	LD_Chr_1_173743163_174074570	upstream_gene_variant	MODIFIER	+
rs33789628	174066879	1	Mpz	171150711	171161130	1	4.43e-21	cis	FALSE	LD_Chr_1_173743163_174074570	5_prime_UTR_variant	MODIFIER	+
rs33789375	174219588	1	Mpz	171150711	171161130	1	4.43e-21	cis	FALSE	LD_Chr_1_174149042_174219722	non_coding_transcript_variant	MODIFIER	+
rs33788373	174219722	1	Mpz	171150711	171161130	1	4.43e-21	cis	FALSE	NA	non_coding_transcript_variant	MODIFIER	+
rs47738113	174242078	1	Mpz	171150711	171161130	1	4.43e-21	cis	FALSE	LD_Chr_1_174241778_174246095	non_coding_transcript_variant	MODIFIER	+
rs31256027	174246095	1	Mpz	171150711	171161130	1	4.43e-21	cis	FALSE	NA	downstream_gene_variant	MODIFIER	+
rs33808818	174358309	1	Mpz	171150711	171161130	1	4.43e-21	cis	FALSE	LD_Chr_1_174357974_174466191	intergenic_variant	MODIFIER	+
rs33806783	174431570	1	Mpz	171150711	171161130	1	4.43e-21	cis	FALSE	LD_Chr_1_174357974_174466191	downstream_gene_variant	MODIFIER	+
rs33803622	174546388	1	Mpz	171150711	171161130	1	4.43e-21	cis	FALSE	LD_Chr_1_174537391_174555849	non_coding_transcript_variant	MODIFIER	+
rs33799726	174583205	1	Mpz	171150711	171161130	1	4.43e-21	cis	FALSE	LD_Chr_1_174560886_174621837	intron_variant	MODIFIER	+
rs31633927	175298420	1	Mpz	171150711	171161130	1	4.43e-21	cis	FALSE	LD_Chr_1_175054333_175440535	intron_variant	MODIFIER	+
rs31630136	175318661	1	Mpz	171150711	171161130	1	4.43e-21	cis	FALSE	LD_Chr_1_175054333_175440535	intron_variant	MODIFIER	+
rs31629323	175319069	1	Mpz	171150711	171161130	1	4.43e-21	cis	FALSE	LD_Chr_1_175054333_175440535	intron_variant	MODIFIER	+
rs31633913	175222432	1	Mpz	171150711	171161130	1	4.43e-21	cis	FALSE	LD_Chr_1_175054333_175440535	intron_variant	MODIFIER	+
rs31631182	175268090	1	Mpz	171150711	171161130	1	4.43e-21	cis	FALSE	LD_Chr_1_175054333_175440535	intron_variant	MODIFIER	+
rs31630762	175276569	1	Mpz	171150711	171161130	1	4.43e-21	cis	FALSE	LD_Chr_1_175054333_175440535	intron_variant	MODIFIER	+
rs31630761	175276584	1	Mpz	171150711	171161130	1	4.43e-21	cis	FALSE	LD_Chr_1_175054333_175440535	intron_variant	MODIFIER	+
rs31634297	175286465	1	Mpz	171150711	171161130	1	4.43e-21	cis	FALSE	LD_Chr_1_175054333_175440535	intron_variant	MODIFIER	+
rs31633368	175286926	1	Mpz	171150711	171161130	1	4.43e-21	cis	FALSE	LD_Chr_1_175054333_175440535	intron_variant	MODIFIER	+
rs3665667	175296563	1	Mpz	171150711	171161130	1	4.43e-21	cis	FALSE	LD_Chr_1_175054333_175440535	intron_variant	MODIFIER	+
rs30995950	174975782	1	Mpz	171150711	171161130	1	4.43e-21	cis	FALSE	LD_Chr_1_174941203_174981277	intergenic_variant	MODIFIER	+
rs30953952	174981953	1	Mpz	171150711	171161130	1	4.43e-21	cis	FALSE	NA	intergenic_variant	MODIFIER	+
rs48143955	175007523	1	Mpz	171150711	171161130	1	4.43e-21	cis	FALSE	LD_Chr_1_174981953_175049013	intergenic_variant	MODIFIER	+
rs50880706	175007841	1	Mpz	171150711	171161130	1	4.43e-21	cis	FALSE	LD_Chr_1_174981953_175049013	intergenic_variant	MODIFIER	+
rs48151745	175041914	1	Mpz	171150711	171161130	1	4.43e-21	cis	FALSE	LD_Chr_1_174981953_175049013	intergenic_variant	MODIFIER	+
rs51773989	175082196	1	Mpz	171150711	171161130	1	4.43e-21	cis	FALSE	LD_Chr_1_175054333_175440535	intron_variant	MODIFIER	+
rs31642210	175128987	1	Mpz	171150711	171161130	1	4.43e-21	cis	FALSE	LD_Chr_1_175054333_175440535	intron_variant	MODIFIER	+
rs31636255	175170188	1	Mpz	171150711	171161130	1	4.43e-21	cis	FALSE	LD_Chr_1_175054333_175440535	intron_variant	MODIFIER	+
rs31637636	175196012	1	Mpz	171150711	171161130	1	4.43e-21	cis	FALSE	LD_Chr_1_175054333_175440535	intron_variant	MODIFIER	+
rs51599367	174854175	1	Mpz	171150711	171161130	1	4.43e-21	cis	FALSE	LD_Chr_1_174676808_174861038	intron_variant	MODIFIER	+
rs31928650	174854882	1	Mpz	171150711	171161130	1	4.43e-21	cis	FALSE	LD_Chr_1_174676808_174861038	intron_variant	MODIFIER	+
rs32468312	174861038	1	Mpz	171150711	171161130	1	4.43e-21	cis	FALSE	NA	intron_variant	MODIFIER	+
rs49047613	174878069	1	Mpz	171150711	171161130	1	4.43e-21	cis	FALSE	NA	intron_variant	MODIFIER	+
rs31691064	174687861	1	Mpz	171150711	171161130	1	4.43e-21	cis	FALSE	LD_Chr_1_174676808_174861038	intron_variant	MODIFIER	+
rs30707962	174621771	1	Mpz	171150711	171161130	1	4.43e-21	cis	FALSE	LD_Chr_1_174560886_174621837	intron_variant	MODIFIER	+
rs33796943	174639647	1	Mpz	171150711	171161130	1	4.43e-21	cis	FALSE	LD_Chr_1_174637446_174674304	intron_variant	MODIFIER	+
rs32077545	174674981	1	Mpz	171150711	171161130	1	4.43e-21	cis	FALSE	NA	intron_variant	MODIFIER	+
rs31852508	175054333	1	Mpz	171150711	171161130	1	4.43e-21	cis	FALSE	NA	downstream_gene_variant	MODIFIER	+
rs3689351	175262198	1	Mpz	171150711	171161130	1	4.43e-21	cis	FALSE	LD_Chr_1_175054333_175440535	intron_variant	MODIFIER	+
rs46501754	174813426	1	Mpz	171150711	171161130	1	4.43e-21	cis	FALSE	LD_Chr_1_174676808_174861038	intron_variant	MODIFIER	+
rs49368821	174813509	1	Mpz	171150711	171161130	1	4.43e-21	cis	FALSE	LD_Chr_1_174676808_174861038	non_coding_transcript_variant	MODIFIER	+
rs3669384	173722904	1	Mpz	171150711	171161130	1	4.43e-21	cis	FALSE	NA	downstream_gene_variant	MODIFIER	+
rs31842921	174650604	1	Mpz	171150711	171161130	1	4.43e-21	cis	FALSE	LD_Chr_1_174637446_174674304	non_coding_transcript_variant	MODIFIER	+
rs31750312	175325661	1	Mpz	171150711	171161130	1	4.43e-21	cis	FALSE	LD_Chr_1_175054333_175440535	intron_variant	MODIFIER	+
rs32727777	175331265	1	Mpz	171150711	171161130	1	4.43e-21	cis	FALSE	LD_Chr_1_175054333_175440535	intron_variant	MODIFIER	+
rs31636939	175144102	1	Mpz	171150711	171161130	1	4.43e-21	cis	FALSE	LD_Chr_1_175054333_175440535	intron_variant	MODIFIER	+
rs6351546	1376772121	9	Acy1	1376979874	1376985212	9	4.56e-21	cis	FALSE	LD_Chr_9_1376309766_1376953147	missense_variant	MODERATE	NA
rs30890762	2445694846	19	Sec31b	2445830764	2445859671	19	4.73e-21	cis	FALSE	LD_Chr_19_2445693208_2446246532	intergenic_variant	MODIFIER	NA
rs36797229	1175654633	8	Gsr	1174798203	1174843843	8	4.78e-21	cis	FALSE	LD_Chr_8_1172961821_1182556240	downstream_gene_variant	MODIFIER	NA
rs30368985	2446114165	19	Sec31b	2445830764	2445859671	19	5.25e-21	cis	FALSE	LD_Chr_19_2445693208_2446246532	intron_variant	MODIFIER	NA
rs30451776	2446121591	19	Sec31b	2445830764	2445859671	19	5.33e-21	cis	FALSE	LD_Chr_19_2445693208_2446246532	intron_variant	MODIFIER	NA
rs30771244	2447920134	19	Sec31b	2445830764	2445859671	19	5.33e-21	cis	FALSE	LD_Chr_19_2447624260_2448359008	NMD_transcript_variant	MODIFIER	NA
rs30472974	1376892471	9	Acy1	1376979874	1376985212	9	5.38e-21	cis	FALSE	LD_Chr_9_1376309766_1376953147	non_coding_transcript_variant	MODIFIER	NA
rs36749845	1376806763	9	Acy1	1376979874	1376985212	9	5.38e-21	cis	FALSE	LD_Chr_9_1376309766_1376953147	intergenic_variant	MODIFIER	NA
rs46339257	172751392	1	Mpz	171150711	171161130	1	5.7e-21	cis	FALSE	NA	non_coding_transcript_variant	MODIFIER	+
rs31568157	172322660	1	Mpz	171150711	171161130	1	5.73e-21	cis	FALSE	LD_Chr_1_171438247_172381513	downstream_gene_variant	MODIFIER	+
rs31564910	172328750	1	Mpz	171150711	171161130	1	5.73e-21	cis	FALSE	LD_Chr_1_171438247_172381513	intron_variant	MODIFIER	+
rs32362080	172247498	1	Mpz	171150711	171161130	1	5.73e-21	cis	FALSE	LD_Chr_1_171438247_172381513	intron_variant	MODIFIER	+
rs27829119	597479476	4	Alad	600134044	600144793	4	6e-21	cis	FALSE	LD_Chr_4_597420328_600821767	intron_variant	MODIFIER	NA
rs30997056	2445893846	19	Hif1an	2445876657	2445890081	19	6.1e-21	cis	FALSE	LD_Chr_19_2445693208_2446246532	downstream_gene_variant	MODIFIER	NA
rs31061689	2445893584	19	Hif1an	2445876657	2445890081	19	6.1e-21	cis	FALSE	LD_Chr_19_2445693208_2446246532	downstream_gene_variant	MODIFIER	NA
rs30945193	2445894628	19	Hif1an	2445876657	2445890081	19	6.1e-21	cis	FALSE	LD_Chr_19_2445693208_2446246532	downstream_gene_variant	MODIFIER	NA
rs37596836	2445894775	19	Hif1an	2445876657	2445890081	19	6.1e-21	cis	FALSE	LD_Chr_19_2445693208_2446246532	downstream_gene_variant	MODIFIER	NA
rs37727886	2445898818	19	Hif1an	2445876657	2445890081	19	6.1e-21	cis	FALSE	LD_Chr_19_2445693208_2446246532	intergenic_variant	MODIFIER	NA
rs30753834	134704323	1	Ppp1r12b	134754658	134955942	1	6.2e-21	cis	FALSE	LD_Chr_1_134653566_135312467	upstream_gene_variant	MODIFIER	NA
rs29527817	1803207816	13	Psmg3	833956583	833959876	5	6.34e-21	trans	FALSE	LD_Chr_13_1799628853_1803697190	intergenic_variant	MODIFIER	NA
rs31726175	38788921	1	Pdcl3	38985608	38997238	1	6.51e-21	cis	FALSE	LD_Chr_1_38760847_39017100	downstream_gene_variant	MODIFIER	NA
rs32528114	175349305	1	Mpz	171150711	171161130	1	6.73e-21	cis	FALSE	LD_Chr_1_175054333_175440535	intron_variant	MODIFIER	+
rs30219304	65964778	1	Acadl	66830839	66863277	1	6.8e-21	cis	FALSE	LD_Chr_1_65505631_67985509	intergenic_variant	MODIFIER	NA
rs30449134	67704695	1	Acadl	66830839	66863277	1	6.8e-21	cis	FALSE	LD_Chr_1_65505631_67985509	intergenic_variant	MODIFIER	NA
rs33673900	2242620591	17	Fahd1	2240472789	2240474261	17	6.85e-21	cis	FALSE	LD_Chr_17_2242512091_2242624855	NMD_transcript_variant	MODIFIER	NA
rs33173464	2242512091	17	Fahd1	2240472789	2240474261	17	6.85e-21	cis	FALSE	NA	non_coding_transcript_variant	MODIFIER	NA
rs31147362	173009377	1	Mpz	171150711	171161130	1	7.02e-21	cis	FALSE	LD_Chr_1_172937148_173340126	intergenic_variant	MODIFIER	+
rs46352173	174250860	1	Mpz	171150711	171161130	1	7.06e-21	cis	FALSE	LD_Chr_1_174249092_174297141	downstream_gene_variant	MODIFIER	+
rs45743632	174250951	1	Mpz	171150711	171161130	1	7.06e-21	cis	FALSE	LD_Chr_1_174249092_174297141	downstream_gene_variant	MODIFIER	+
rs33051975	38776824	1	Pdcl3	38985608	38997238	1	7.06e-21	cis	FALSE	LD_Chr_1_38760847_39017100	intergenic_variant	MODIFIER	NA
rs30513442	38779731	1	Pdcl3	38985608	38997238	1	7.06e-21	cis	FALSE	LD_Chr_1_38760847_39017100	intergenic_variant	MODIFIER	NA
rs32778976	38785789	1	Pdcl3	38985608	38997238	1	7.06e-21	cis	FALSE	LD_Chr_1_38760847_39017100	intergenic_variant	MODIFIER	NA
rs31777232	172937148	1	Mpz	171150711	171161130	1	7.13e-21	cis	FALSE	NA	upstream_gene_variant	MODIFIER	+
rs31552439	171367179	1	Mpz	171150711	171161130	1	7.26e-21	cis	FALSE	LD_Chr_1_171342027_171397409	downstream_gene_variant	MODIFIER	+
rs31538474	171285646	1	Mpz	171150711	171161130	1	7.26e-21	cis	FALSE	NA	NMD_transcript_variant	MODIFIER	+
rs50875470	172763802	1	Mpz	171150711	171161130	1	7.45e-21	cis	FALSE	LD_Chr_1_172753081_172832045	non_coding_transcript_variant	MODIFIER	+
rs38351145	1377048256	9	Acy1	1376979874	1376985212	9	7.45e-21	cis	FALSE	LD_Chr_9_1376955401_1378239628	NMD_transcript_variant	MODIFIER	NA
rs6340679	1376984420	9	Acy1	1376979874	1376985212	9	8.19e-21	cis	TRUE	LD_Chr_9_1376955401_1378239628	downstream_gene_variant	MODIFIER	NA
rs29749819	1376989422	9	Acy1	1376979874	1376985212	9	8.19e-21	cis	FALSE	LD_Chr_9_1376955401_1378239628	upstream_gene_variant	MODIFIER	NA
rs29738953	1376996003	9	Acy1	1376979874	1376985212	9	8.19e-21	cis	FALSE	LD_Chr_9_1376955401_1378239628	upstream_gene_variant	MODIFIER	NA
rs33389180	2241631196	17	Fahd1	2240472789	2240474261	17	8.26e-21	cis	FALSE	LD_Chr_17_2241617257_2241664073	intron_variant	MODIFIER	NA
rs31551433	171368654	1	Mpz	171150711	171161130	1	9.24e-21	cis	FALSE	LD_Chr_1_171342027_171397409	upstream_gene_variant	MODIFIER	+
rs8245237	171246149	1	Mpz	171150711	171161130	1	9.24e-21	cis	FALSE	LD_Chr_1_171234692_171269985	upstream_gene_variant	MODIFIER	+
rs31544253	1000544343	7	Isoc2b	1000549180	1000574479	7	9.37e-21	cis	FALSE	NA	downstream_gene_variant	MODIFIER	NA
rs32511950	1000512985	7	Isoc2b	1000549180	1000574479	7	9.37e-21	cis	FALSE	LD_Chr_7_1000486968_1000526671	downstream_gene_variant	MODIFIER	NA
rs31559395	172530124	1	Mpz	171150711	171161130	1	9.51e-21	cis	FALSE	LD_Chr_1_172493080_172576522	intron_variant	MODIFIER	+
rs31611468	173340126	1	Mpz	171150711	171161130	1	9.51e-21	cis	FALSE	NA	downstream_gene_variant	MODIFIER	+
rs30862481	134641914	1	Ppp1r12b	134754658	134955942	1	9.7e-21	cis	FALSE	LD_Chr_1_134590127_134653305	downstream_gene_variant	MODIFIER	NA
rs32408862	174902526	1	Mpz	171150711	171161130	1	9.9e-21	cis	FALSE	LD_Chr_1_174878069_174919689	intron_variant	MODIFIER	+
rs29758754	2299625199	17	Cox7a2l	2299125815	2299141227	17	1.05e-20	cis	FALSE	LD_Chr_17_2299364879_2300346057	non_coding_transcript_variant	MODIFIER	NA
rs29765519	2299578522	17	Cox7a2l	2299125815	2299141227	17	1.05e-20	cis	FALSE	LD_Chr_17_2299364879_2300346057	upstream_gene_variant	MODIFIER	NA
rs29760103	2299597485	17	Cox7a2l	2299125815	2299141227	17	1.05e-20	cis	FALSE	LD_Chr_17_2299364879_2300346057	intergenic_variant	MODIFIER	NA
rs33298425	2299436687	17	Cox7a2l	2299125815	2299141227	17	1.05e-20	cis	FALSE	LD_Chr_17_2299364879_2300346057	intron_variant	MODIFIER	NA
rs30240580	66232333	1	Acadl	66830839	66863277	1	1.06e-20	cis	FALSE	LD_Chr_1_65505631_67985509	intron_variant	MODIFIER	NA
rs31536977	171453136	1	Mpz	171150711	171161130	1	1.1e-20	cis	FALSE	LD_Chr_1_171438247_172381513	non_coding_transcript_variant	MODIFIER	+
rs6276649	2445740595	19	Arl3	2447844916	2447886892	19	1.12e-20	cis	FALSE	LD_Chr_19_2445693208_2446246532	non_coding_transcript_variant	MODIFIER	NA
rs30670656	135041701	1	Ppp1r12b	134754658	134955942	1	1.13e-20	cis	FALSE	LD_Chr_1_134653566_135312467	intron_variant	MODIFIER	NA
rs31619616	173213441	1	Mpz	171150711	171161130	1	1.15e-20	cis	FALSE	LD_Chr_1_172937148_173340126	upstream_gene_variant	MODIFIER	+
rs30838936	134933543	1	Ppp1r12b	134754658	134955942	1	1.15e-20	cis	TRUE	LD_Chr_1_134653566_135312467	intron_variant	MODIFIER	NA
rs6381271	93206098	1	D2hgdh	93824909	93852348	1	1.17e-20	cis	FALSE	LD_Chr_1_93106085_93526021	intron_variant	MODIFIER	NA
rs50473694	2244750608	17	Glo1	2246216763	2246236556	17	1.18e-20	cis	FALSE	LD_Chr_17_2244735426_2244870049	non_coding_transcript_variant	MODIFIER	NA
rs33133850	2242755864	17	Fahd1	2240472789	2240474261	17	1.18e-20	cis	FALSE	NA	intron_variant	MODIFIER	NA
rs33796222	2242757242	17	Fahd1	2240472789	2240474261	17	1.18e-20	cis	FALSE	LD_Chr_17_2242755864_2243002765	intron_variant	MODIFIER	NA
rs29500570	2242707787	17	Fahd1	2240472789	2240474261	17	1.18e-20	cis	FALSE	LD_Chr_17_2242625588_2242732357	intron_variant	MODIFIER	NA
rs33118192	2242714150	17	Fahd1	2240472789	2240474261	17	1.18e-20	cis	FALSE	LD_Chr_17_2242625588_2242732357	upstream_gene_variant	MODIFIER	NA
rs33363706	2242860116	17	Fahd1	2240472789	2240474261	17	1.18e-20	cis	FALSE	LD_Chr_17_2242755864_2243002765	non_coding_transcript_exon_variant	MODIFIER	NA
rs30618005	2244940772	17	Glo1	2246216763	2246236556	17	1.19e-20	cis	FALSE	NA	upstream_gene_variant	MODIFIER	NA
rs30863225	134641330	1	Ppp1r12b	134754658	134955942	1	1.2e-20	cis	FALSE	LD_Chr_1_134590127_134653305	downstream_gene_variant	MODIFIER	NA
rs31562649	172538781	1	Mpz	171150711	171161130	1	1.2e-20	cis	FALSE	LD_Chr_1_172493080_172576522	downstream_gene_variant	MODIFIER	+
rs30376703	67195821	1	Acadl	66830839	66863277	1	1.24e-20	cis	FALSE	LD_Chr_1_65505631_67985509	intron_variant	MODIFIER	NA
rs30286380	66509948	1	Acadl	66830839	66863277	1	1.24e-20	cis	FALSE	LD_Chr_1_65505631_67985509	intron_variant	MODIFIER	NA
rs32096784	66525498	1	Acadl	66830839	66863277	1	1.24e-20	cis	FALSE	LD_Chr_1_65505631_67985509	intron_variant	MODIFIER	NA
rs30330088	66811198	1	Acadl	66830839	66863277	1	1.24e-20	cis	FALSE	LD_Chr_1_65505631_67985509	upstream_gene_variant	MODIFIER	NA
rs30367891	1176636427	8	Gsr	1174798203	1174843843	8	1.24e-20	cis	FALSE	LD_Chr_8_1172961821_1182556240	intron_variant	MODIFIER	NA
rs31524603	135716445	1	Ppp1r12b	134754658	134955942	1	1.3e-20	cis	FALSE	LD_Chr_1_135328566_137777833	upstream_gene_variant	MODIFIER	NA
rs30609641	2445613706	19	Arl3	2447844916	2447886892	19	1.31e-20	cis	FALSE	LD_Chr_19_2445531301_2445634419	intron_variant	MODIFIER	NA
rs30607542	2445607025	19	Arl3	2447844916	2447886892	19	1.31e-20	cis	FALSE	LD_Chr_19_2445531301_2445634419	upstream_gene_variant	MODIFIER	NA
rs30517765	2445606536	19	Arl3	2447844916	2447886892	19	1.31e-20	cis	FALSE	LD_Chr_19_2445531301_2445634419	upstream_gene_variant	MODIFIER	NA
rs30763764	2445570131	19	Arl3	2447844916	2447886892	19	1.31e-20	cis	FALSE	LD_Chr_19_2445531301_2445634419	non_coding_transcript_variant	MODIFIER	NA
rs30366383	2445570274	19	Arl3	2447844916	2447886892	19	1.31e-20	cis	FALSE	LD_Chr_19_2445531301_2445634419	non_coding_transcript_variant	MODIFIER	NA
rs6190636	2244034930	17	Glo1	2246216763	2246236556	17	1.31e-20	cis	FALSE	NA	intron_variant	MODIFIER	NA
rs13482937	2244062802	17	Glo1	2246216763	2246236556	17	1.31e-20	cis	FALSE	NA	intron_variant	MODIFIER	NA
rs33212704	2244209252	17	Glo1	2246216763	2246236556	17	1.31e-20	cis	FALSE	LD_Chr_17_2244062802_2244289318	downstream_gene_variant	MODIFIER	NA
rs51141045	172885955	1	Mpz	171150711	171161130	1	1.33e-20	cis	FALSE	LD_Chr_1_172867505_172902741	intergenic_variant	MODIFIER	+
rs31280395	2445612181	19	Arl3	2447844916	2447886892	19	1.35e-20	cis	FALSE	LD_Chr_19_2445531301_2445634419	intron_variant	MODIFIER	NA
rs29985737	1378239628	9	Acy1	1376979874	1376985212	9	1.4e-20	cis	FALSE	NA	upstream_gene_variant	MODIFIER	NA
rs30227574	1377059508	9	Acy1	1376979874	1376985212	9	1.41e-20	cis	FALSE	LD_Chr_9_1376955401_1378239628	upstream_gene_variant	MODIFIER	NA
rs33806780	174431943	1	Mpz	171150711	171161130	1	1.41e-20	cis	FALSE	LD_Chr_1_174357974_174466191	downstream_gene_variant	MODIFIER	+
rs33780879	174210967	1	Mpz	171150711	171161130	1	1.41e-20	cis	FALSE	LD_Chr_1_174149042_174219722	upstream_gene_variant	MODIFIER	+
rs37835183	2445785346	19	Arl3	2447844916	2447886892	19	1.41e-20	cis	FALSE	LD_Chr_19_2445693208_2446246532	intergenic_variant	MODIFIER	NA
rs30349986	2446256286	19	Arl3	2447844916	2447886892	19	1.46e-20	cis	FALSE	NA	missense_variant	MODERATE	NA
rs30407954	2448364956	19	Arl3	2447844916	2447886892	19	1.46e-20	cis	FALSE	NA	upstream_gene_variant	MODIFIER	NA
rs31560405	172487253	1	Mpz	171150711	171161130	1	1.46e-20	cis	FALSE	NA	non_coding_transcript_variant	MODIFIER	+
rs50032336	2300502218	17	Cox7a2l	2299125815	2299141227	17	1.48e-20	cis	FALSE	LD_Chr_17_2300418349_2300557875	intergenic_variant	MODIFIER	NA
rs3659655	173410907	1	Mpz	171150711	171161130	1	1.54e-20	cis	FALSE	LD_Chr_1_173370140_173679184	intron_variant	MODIFIER	+
rs3719697	173924840	1	Mpz	171150711	171161130	1	1.55e-20	cis	FALSE	LD_Chr_1_173743163_174074570	intron_variant	MODIFIER	+
rs31543970	171413911	1	Mpz	171150711	171161130	1	1.71e-20	cis	FALSE	NA	upstream_gene_variant	MODIFIER	+
rs30839298	134846012	1	Ppp1r12b	134754658	134955942	1	1.71e-20	cis	TRUE	LD_Chr_1_134653566_135312467	intron_variant	MODIFIER	NA
rs30304070	66688824	1	Acadl	66830839	66863277	1	1.74e-20	cis	FALSE	LD_Chr_1_65505631_67985509	intron_variant	MODIFIER	NA
rs37912058	1376611882	9	Acy1	1376979874	1376985212	9	1.79e-20	cis	FALSE	LD_Chr_9_1376309766_1376953147	intron_variant	MODIFIER	NA
rs4139493	175262251	1	Mpz	171150711	171161130	1	1.88e-20	cis	FALSE	LD_Chr_1_175054333_175440535	intron_variant	MODIFIER	+
rs36454736	1175684807	8	Gsr	1174798203	1174843843	8	1.89e-20	cis	FALSE	LD_Chr_8_1172961821_1182556240	intergenic_variant	MODIFIER	NA
rs39272442	1175714080	8	Gsr	1174798203	1174843843	8	1.89e-20	cis	FALSE	LD_Chr_8_1172961821_1182556240	intergenic_variant	MODIFIER	NA
rs37759897	1175719211	8	Gsr	1174798203	1174843843	8	1.89e-20	cis	FALSE	LD_Chr_8_1172961821_1182556240	intergenic_variant	MODIFIER	NA
rs38837759	1175721216	8	Gsr	1174798203	1174843843	8	1.89e-20	cis	FALSE	LD_Chr_8_1172961821_1182556240	intergenic_variant	MODIFIER	NA
rs37181431	1175724408	8	Gsr	1174798203	1174843843	8	1.89e-20	cis	FALSE	LD_Chr_8_1172961821_1182556240	intergenic_variant	MODIFIER	NA
rs36625072	1175734669	8	Gsr	1174798203	1174843843	8	1.89e-20	cis	FALSE	LD_Chr_8_1172961821_1182556240	downstream_gene_variant	MODIFIER	NA
rs30271193	1175759828	8	Gsr	1174798203	1174843843	8	1.89e-20	cis	FALSE	LD_Chr_8_1172961821_1182556240	non_coding_transcript_variant	MODIFIER	NA
rs30274286	1175772201	8	Gsr	1174798203	1174843843	8	1.89e-20	cis	FALSE	LD_Chr_8_1172961821_1182556240	non_coding_transcript_variant	MODIFIER	NA
rs30273162	1175787941	8	Gsr	1174798203	1174843843	8	1.89e-20	cis	FALSE	LD_Chr_8_1172961821_1182556240	upstream_gene_variant	MODIFIER	NA
rs50858968	1175755865	8	Gsr	1174798203	1174843843	8	1.89e-20	cis	FALSE	LD_Chr_8_1172961821_1182556240	non_coding_transcript_variant	MODIFIER	NA
rs30274722	1175867454	8	Gsr	1174798203	1174843843	8	1.89e-20	cis	FALSE	LD_Chr_8_1172961821_1182556240	intergenic_variant	MODIFIER	NA
rs30285409	1175914464	8	Gsr	1174798203	1174843843	8	1.89e-20	cis	FALSE	LD_Chr_8_1172961821_1182556240	intergenic_variant	MODIFIER	NA
rs30230981	1174801137	8	Gsr	1174798203	1174843843	8	1.89e-20	cis	TRUE	LD_Chr_8_1172961821_1182556240	non_coding_transcript_variant	MODIFIER	NA
rs30240582	1174914372	8	Gsr	1174798203	1174843843	8	1.89e-20	cis	FALSE	LD_Chr_8_1172961821_1182556240	intron_variant	MODIFIER	NA
rs30244857	1174919028	8	Gsr	1174798203	1174843843	8	1.89e-20	cis	FALSE	LD_Chr_8_1172961821_1182556240	intron_variant	MODIFIER	NA
rs30241434	1174924807	8	Gsr	1174798203	1174843843	8	1.89e-20	cis	FALSE	LD_Chr_8_1172961821_1182556240	downstream_gene_variant	MODIFIER	NA
rs30241172	1174940992	8	Gsr	1174798203	1174843843	8	1.89e-20	cis	FALSE	LD_Chr_8_1172961821_1182556240	intron_variant	MODIFIER	NA
rs6368806	1174962114	8	Gsr	1174798203	1174843843	8	1.89e-20	cis	FALSE	LD_Chr_8_1172961821_1182556240	NMD_transcript_variant	MODIFIER	NA
rs30248489	1174964487	8	Gsr	1174798203	1174843843	8	1.89e-20	cis	FALSE	LD_Chr_8_1172961821_1182556240	NMD_transcript_variant	MODIFIER	NA
rs30242904	1174987011	8	Gsr	1174798203	1174843843	8	1.89e-20	cis	FALSE	LD_Chr_8_1172961821_1182556240	non_coding_transcript_variant	MODIFIER	NA
rs30242910	1174987133	8	Gsr	1174798203	1174843843	8	1.89e-20	cis	FALSE	LD_Chr_8_1172961821_1182556240	non_coding_transcript_variant	MODIFIER	NA
rs30236530	1174809537	8	Gsr	1174798203	1174843843	8	1.89e-20	cis	TRUE	LD_Chr_8_1172961821_1182556240	intron_variant	MODIFIER	NA
rs30241568	1174830333	8	Gsr	1174798203	1174843843	8	1.89e-20	cis	TRUE	LD_Chr_8_1172961821_1182556240	intron_variant	MODIFIER	NA
rs30270935	1175032580	8	Gsr	1174798203	1174843843	8	1.89e-20	cis	FALSE	LD_Chr_8_1172961821_1182556240	intron_variant	MODIFIER	NA
rs30270938	1175032625	8	Gsr	1174798203	1174843843	8	1.89e-20	cis	FALSE	LD_Chr_8_1172961821_1182556240	upstream_gene_variant	MODIFIER	NA
rs30271620	1175052883	8	Gsr	1174798203	1174843843	8	1.89e-20	cis	FALSE	LD_Chr_8_1172961821_1182556240	intron_variant	MODIFIER	NA
rs49469018	1175211487	8	Gsr	1174798203	1174843843	8	1.89e-20	cis	FALSE	LD_Chr_8_1172961821_1182556240	intergenic_variant	MODIFIER	NA
rs49925699	1175250325	8	Gsr	1174798203	1174843843	8	1.89e-20	cis	FALSE	LD_Chr_8_1172961821_1182556240	non_coding_transcript_variant	MODIFIER	NA
rs51600996	1175266451	8	Gsr	1174798203	1174843843	8	1.89e-20	cis	FALSE	LD_Chr_8_1172961821_1182556240	upstream_gene_variant	MODIFIER	NA
rs51014657	1175343803	8	Gsr	1174798203	1174843843	8	1.89e-20	cis	FALSE	LD_Chr_8_1172961821_1182556240	intergenic_variant	MODIFIER	NA
rs39096456	1175442371	8	Gsr	1174798203	1174843843	8	1.89e-20	cis	FALSE	LD_Chr_8_1172961821_1182556240	upstream_gene_variant	MODIFIER	NA
rs36451471	1175442971	8	Gsr	1174798203	1174843843	8	1.89e-20	cis	FALSE	LD_Chr_8_1172961821_1182556240	upstream_gene_variant	MODIFIER	NA
rs36907204	1175444045	8	Gsr	1174798203	1174843843	8	1.89e-20	cis	FALSE	LD_Chr_8_1172961821_1182556240	upstream_gene_variant	MODIFIER	NA
rs36715782	1175448177	8	Gsr	1174798203	1174843843	8	1.89e-20	cis	FALSE	LD_Chr_8_1172961821_1182556240	downstream_gene_variant	MODIFIER	NA
rs36877573	1175511883	8	Gsr	1174798203	1174843843	8	1.89e-20	cis	FALSE	LD_Chr_8_1172961821_1182556240	upstream_gene_variant	MODIFIER	NA
rs38804665	1175543246	8	Gsr	1174798203	1174843843	8	1.89e-20	cis	FALSE	LD_Chr_8_1172961821_1182556240	intergenic_variant	MODIFIER	NA
rs38146046	1175550332	8	Gsr	1174798203	1174843843	8	1.89e-20	cis	FALSE	LD_Chr_8_1172961821_1182556240	intergenic_variant	MODIFIER	NA
rs32864344	1175574522	8	Gsr	1174798203	1174843843	8	1.89e-20	cis	FALSE	LD_Chr_8_1172961821_1182556240	non_coding_transcript_variant	MODIFIER	NA
rs37043725	1175578417	8	Gsr	1174798203	1174843843	8	1.89e-20	cis	FALSE	LD_Chr_8_1172961821_1182556240	non_coding_transcript_variant	MODIFIER	NA
rs36541870	1175601220	8	Gsr	1174798203	1174843843	8	1.89e-20	cis	FALSE	LD_Chr_8_1172961821_1182556240	non_coding_transcript_variant	MODIFIER	NA
rs37315930	1175602429	8	Gsr	1174798203	1174843843	8	1.89e-20	cis	FALSE	LD_Chr_8_1172961821_1182556240	non_coding_transcript_variant	MODIFIER	NA
rs38471680	1175648703	8	Gsr	1174798203	1174843843	8	1.89e-20	cis	FALSE	LD_Chr_8_1172961821_1182556240	upstream_gene_variant	MODIFIER	NA
rs32850711	1175201093	8	Gsr	1174798203	1174843843	8	1.89e-20	cis	FALSE	LD_Chr_8_1172961821_1182556240	non_coding_transcript_exon_variant	MODIFIER	NA
rs30244006	1174906075	8	Gsr	1174798203	1174843843	8	1.89e-20	cis	FALSE	LD_Chr_8_1172961821_1182556240	intron_variant	MODIFIER	NA
rs32922104	1174906824	8	Gsr	1174798203	1174843843	8	1.89e-20	cis	FALSE	LD_Chr_8_1172961821_1182556240	intron_variant	MODIFIER	NA
rs30240579	1174914057	8	Gsr	1174798203	1174843843	8	1.89e-20	cis	FALSE	LD_Chr_8_1172961821_1182556240	intron_variant	MODIFIER	NA
rs30229894	1174817218	8	Gsr	1174798203	1174843843	8	1.89e-20	cis	TRUE	LD_Chr_8_1172961821_1182556240	synonymous_variant	LOW	NA
rs32864074	1174818150	8	Gsr	1174798203	1174843843	8	1.89e-20	cis	TRUE	LD_Chr_8_1172961821_1182556240	non_coding_transcript_variant	MODIFIER	NA
rs32869686	1174937414	8	Gsr	1174798203	1174843843	8	1.89e-20	cis	FALSE	LD_Chr_8_1172961821_1182556240	NMD_transcript_variant	MODIFIER	NA
rs30243664	1174970011	8	Gsr	1174798203	1174843843	8	1.89e-20	cis	FALSE	LD_Chr_8_1172961821_1182556240	non_coding_transcript_variant	MODIFIER	NA
rs32704364	1174974144	8	Gsr	1174798203	1174843843	8	1.89e-20	cis	FALSE	LD_Chr_8_1172961821_1182556240	non_coding_transcript_variant	MODIFIER	NA
rs3666429	1175004668	8	Gsr	1174798203	1174843843	8	1.89e-20	cis	FALSE	LD_Chr_8_1172961821_1182556240	intron_variant	MODIFIER	NA
rs33424675	1175053028	8	Gsr	1174798203	1174843843	8	1.89e-20	cis	FALSE	LD_Chr_8_1172961821_1182556240	intron_variant	MODIFIER	NA
rs46790144	1175103144	8	Gsr	1174798203	1174843843	8	1.89e-20	cis	FALSE	LD_Chr_8_1172961821_1182556240	intergenic_variant	MODIFIER	NA
rs45709390	1175103234	8	Gsr	1174798203	1174843843	8	1.89e-20	cis	FALSE	LD_Chr_8_1172961821_1182556240	intergenic_variant	MODIFIER	NA
rs32621552	1175296025	8	Gsr	1174798203	1174843843	8	1.89e-20	cis	FALSE	LD_Chr_8_1172961821_1182556240	upstream_gene_variant	MODIFIER	NA
rs32797700	1175337402	8	Gsr	1174798203	1174843843	8	1.89e-20	cis	FALSE	LD_Chr_8_1172961821_1182556240	intergenic_variant	MODIFIER	NA
rs32615532	1175357643	8	Gsr	1174798203	1174843843	8	1.89e-20	cis	FALSE	LD_Chr_8_1172961821_1182556240	upstream_gene_variant	MODIFIER	NA
rs32797497	1175360649	8	Gsr	1174798203	1174843843	8	1.89e-20	cis	FALSE	LD_Chr_8_1172961821_1182556240	upstream_gene_variant	MODIFIER	NA
rs33363514	1175416653	8	Gsr	1174798203	1174843843	8	1.89e-20	cis	FALSE	LD_Chr_8_1172961821_1182556240	intergenic_variant	MODIFIER	NA
rs33570525	1175549510	8	Gsr	1174798203	1174843843	8	1.89e-20	cis	FALSE	LD_Chr_8_1172961821_1182556240	intergenic_variant	MODIFIER	NA
rs33326337	1175608056	8	Gsr	1174798203	1174843843	8	1.89e-20	cis	FALSE	LD_Chr_8_1172961821_1182556240	non_coding_transcript_variant	MODIFIER	NA
rs32836808	1175707279	8	Gsr	1174798203	1174843843	8	1.89e-20	cis	FALSE	LD_Chr_8_1172961821_1182556240	intergenic_variant	MODIFIER	NA
rs33473011	1175707656	8	Gsr	1174798203	1174843843	8	1.89e-20	cis	FALSE	LD_Chr_8_1172961821_1182556240	intergenic_variant	MODIFIER	NA
rs33048383	1175732963	8	Gsr	1174798203	1174843843	8	1.89e-20	cis	FALSE	LD_Chr_8_1172961821_1182556240	downstream_gene_variant	MODIFIER	NA
rs33383690	1175733024	8	Gsr	1174798203	1174843843	8	1.89e-20	cis	FALSE	LD_Chr_8_1172961821_1182556240	downstream_gene_variant	MODIFIER	NA
rs30276130	1175780983	8	Gsr	1174798203	1174843843	8	1.89e-20	cis	FALSE	LD_Chr_8_1172961821_1182556240	non_coding_transcript_variant	MODIFIER	NA
rs30280251	1175825725	8	Gsr	1174798203	1174843843	8	1.89e-20	cis	FALSE	LD_Chr_8_1172961821_1182556240	intergenic_variant	MODIFIER	NA
rs3673733	1175914605	8	Gsr	1174798203	1174843843	8	1.89e-20	cis	FALSE	LD_Chr_8_1172961821_1182556240	intergenic_variant	MODIFIER	NA
rs3673772	1175914627	8	Gsr	1174798203	1174843843	8	1.89e-20	cis	FALSE	LD_Chr_8_1172961821_1182556240	intergenic_variant	MODIFIER	NA
rs30288397	1175955830	8	Gsr	1174798203	1174843843	8	1.89e-20	cis	FALSE	LD_Chr_8_1172961821_1182556240	intron_variant	MODIFIER	NA
rs30291284	1175856125	8	Gsr	1174798203	1174843843	8	1.89e-20	cis	FALSE	LD_Chr_8_1172961821_1182556240	intergenic_variant	MODIFIER	NA
rs30275305	1175858002	8	Gsr	1174798203	1174843843	8	1.89e-20	cis	FALSE	LD_Chr_8_1172961821_1182556240	intergenic_variant	MODIFIER	NA
rs13464256	2239671688	17	Fahd1	2240472789	2240474261	17	1.9e-20	cis	FALSE	LD_Chr_17_2239582522_2239921491	3_prime_UTR_variant	MODIFIER	NA
rs32334175	175056753	1	Mpz	171150711	171161130	1	1.91e-20	cis	FALSE	LD_Chr_1_175054333_175440535	downstream_gene_variant	MODIFIER	+
rs30839889	134929949	1	Ppp1r12b	134754658	134955942	1	1.96e-20	cis	TRUE	LD_Chr_1_134653566_135312467	intron_variant	MODIFIER	NA
rs30844608	134698913	1	Ppp1r12b	134754658	134955942	1	1.96e-20	cis	FALSE	LD_Chr_1_134653566_135312467	intron_variant	MODIFIER	NA
rs36867132	1376937502	9	Acy1	1376979874	1376985212	9	1.97e-20	cis	FALSE	LD_Chr_9_1376309766_1376953147	intergenic_variant	MODIFIER	NA
rs30423056	1176978177	8	Gsr	1174798203	1174843843	8	1.98e-20	cis	FALSE	LD_Chr_8_1172961821_1182556240	intergenic_variant	MODIFIER	NA
rs30356974	1176601956	8	Gsr	1174798203	1174843843	8	1.98e-20	cis	FALSE	LD_Chr_8_1172961821_1182556240	intergenic_variant	MODIFIER	NA
rs30833324	135125054	1	Ppp1r12b	134754658	134955942	1	2.02e-20	cis	FALSE	LD_Chr_1_134653566_135312467	downstream_gene_variant	MODIFIER	NA
rs49635034	1858507551	13	Cmya5	1861089274	1861193285	13	2.19e-20	cis	FALSE	LD_Chr_13_1858410126_1858916514	intergenic_variant	MODIFIER	NA
rs29566803	1858868732	13	Cmya5	1861089274	1861193285	13	2.19e-20	cis	FALSE	LD_Chr_13_1858410126_1858916514	intergenic_variant	MODIFIER	NA
rs46916588	1858424157	13	Cmya5	1861089274	1861193285	13	2.19e-20	cis	FALSE	LD_Chr_13_1858410126_1858916514	non_coding_transcript_variant	MODIFIER	NA
rs29239646	1858468628	13	Cmya5	1861089274	1861193285	13	2.19e-20	cis	FALSE	LD_Chr_13_1858410126_1858916514	upstream_gene_variant	MODIFIER	NA
rs29732077	1858469033	13	Cmya5	1861089274	1861193285	13	2.19e-20	cis	FALSE	LD_Chr_13_1858410126_1858916514	upstream_gene_variant	MODIFIER	NA
rs32154858	174919689	1	Mpz	171150711	171161130	1	2.2e-20	cis	FALSE	NA	intron_variant	MODIFIER	+
rs32197575	174919525	1	Mpz	171150711	171161130	1	2.2e-20	cis	FALSE	LD_Chr_1_174878069_174919689	intron_variant	MODIFIER	+
rs36777075	2445770522	19	Sec31b	2445830764	2445859671	19	2.22e-20	cis	FALSE	LD_Chr_19_2445693208_2446246532	non_coding_transcript_variant	MODIFIER	NA
rs32612491	1174791443	8	Gsr	1174798203	1174843843	8	2.22e-20	cis	FALSE	LD_Chr_8_1172961821_1182556240	upstream_gene_variant	MODIFIER	NA
rs30224817	1174617751	8	Gsr	1174798203	1174843843	8	2.22e-20	cis	FALSE	LD_Chr_8_1172961821_1182556240	intergenic_variant	MODIFIER	NA
rs32923937	1174632302	8	Gsr	1174798203	1174843843	8	2.22e-20	cis	FALSE	LD_Chr_8_1172961821_1182556240	downstream_gene_variant	MODIFIER	NA
rs30223350	1174675286	8	Gsr	1174798203	1174843843	8	2.22e-20	cis	FALSE	LD_Chr_8_1172961821_1182556240	intron_variant	MODIFIER	NA
rs30223353	1174675340	8	Gsr	1174798203	1174843843	8	2.22e-20	cis	FALSE	LD_Chr_8_1172961821_1182556240	intron_variant	MODIFIER	NA
rs30225655	1174698489	8	Gsr	1174798203	1174843843	8	2.22e-20	cis	FALSE	LD_Chr_8_1172961821_1182556240	intron_variant	MODIFIER	NA
rs33620987	1174698510	8	Gsr	1174798203	1174843843	8	2.22e-20	cis	FALSE	LD_Chr_8_1172961821_1182556240	intron_variant	MODIFIER	NA
rs32562046	1174705135	8	Gsr	1174798203	1174843843	8	2.22e-20	cis	FALSE	LD_Chr_8_1172961821_1182556240	NMD_transcript_variant	MODIFIER	NA
rs30229382	1174735242	8	Gsr	1174798203	1174843843	8	2.22e-20	cis	FALSE	LD_Chr_8_1172961821_1182556240	downstream_gene_variant	MODIFIER	NA
rs32711304	1174743708	8	Gsr	1174798203	1174843843	8	2.22e-20	cis	FALSE	LD_Chr_8_1172961821_1182556240	upstream_gene_variant	MODIFIER	NA
rs30237482	1174789857	8	Gsr	1174798203	1174843843	8	2.22e-20	cis	FALSE	LD_Chr_8_1172961821_1182556240	upstream_gene_variant	MODIFIER	NA
rs30230883	1174753897	8	Gsr	1174798203	1174843843	8	2.22e-20	cis	FALSE	LD_Chr_8_1172961821_1182556240	intron_variant	MODIFIER	NA
rs30230954	1174685205	8	Gsr	1174798203	1174843843	8	2.22e-20	cis	FALSE	LD_Chr_8_1172961821_1182556240	intron_variant	MODIFIER	NA
rs3721987	67402248	1	Acadl	66830839	66863277	1	2.25e-20	cis	FALSE	LD_Chr_1_65505631_67985509	intergenic_variant	MODIFIER	NA
rs30431908	1177052612	8	Gsr	1174798203	1174843843	8	2.26e-20	cis	FALSE	LD_Chr_8_1172961821_1182556240	intergenic_variant	MODIFIER	NA
rs30351360	1176599925	8	Gsr	1174798203	1174843843	8	2.26e-20	cis	FALSE	LD_Chr_8_1172961821_1182556240	intergenic_variant	MODIFIER	NA
rs31157642	2446085171	19	Sec31b	2445830764	2445859671	19	2.28e-20	cis	FALSE	LD_Chr_19_2445693208_2446246532	intron_variant	MODIFIER	NA
rs30359718	2446131642	19	Sec31b	2445830764	2445859671	19	2.28e-20	cis	FALSE	LD_Chr_19_2445693208_2446246532	intron_variant	MODIFIER	NA
rs30522593	2447467954	19	Sec31b	2445830764	2445859671	19	2.28e-20	cis	FALSE	LD_Chr_19_2447378861_2447595192	intron_variant	MODIFIER	NA
rs30453901	2447520806	19	Sec31b	2445830764	2445859671	19	2.28e-20	cis	FALSE	LD_Chr_19_2447378861_2447595192	non_coding_transcript_variant	MODIFIER	NA
rs6307801	2447917312	19	Sec31b	2445830764	2445859671	19	2.28e-20	cis	FALSE	LD_Chr_19_2447624260_2448359008	intron_variant	MODIFIER	NA
rs6184339	2446092758	19	Sec31b	2445830764	2445859671	19	2.28e-20	cis	FALSE	LD_Chr_19_2445693208_2446246532	intron_variant	MODIFIER	NA
rs30904329	2446205653	19	Sec31b	2445830764	2445859671	19	2.28e-20	cis	FALSE	LD_Chr_19_2445693208_2446246532	intergenic_variant	MODIFIER	NA
rs30521761	2446806635	19	Sec31b	2445830764	2445859671	19	2.28e-20	cis	FALSE	LD_Chr_19_2446469995_2447089406	non_coding_transcript_variant	MODIFIER	NA
rs3156417	2446927357	19	Sec31b	2445830764	2445859671	19	2.28e-20	cis	FALSE	LD_Chr_19_2446469995_2447089406	intron_variant	MODIFIER	NA
rs3722316	2447549463	19	Sec31b	2445830764	2445859671	19	2.28e-20	cis	FALSE	LD_Chr_19_2447378861_2447595192	non_coding_transcript_variant	MODIFIER	NA
rs46674888	2447518896	19	Sec31b	2445830764	2445859671	19	2.28e-20	cis	FALSE	LD_Chr_19_2447378861_2447595192	non_coding_transcript_variant	MODIFIER	NA
rs30666996	2448197541	19	Sec31b	2445830764	2445859671	19	2.28e-20	cis	FALSE	LD_Chr_19_2447624260_2448359008	downstream_gene_variant	MODIFIER	NA
rs3713410	2448197847	19	Sec31b	2445830764	2445859671	19	2.28e-20	cis	FALSE	LD_Chr_19_2447624260_2448359008	downstream_gene_variant	MODIFIER	NA
rs30408407	2448198731	19	Sec31b	2445830764	2445859671	19	2.28e-20	cis	FALSE	LD_Chr_19_2447624260_2448359008	downstream_gene_variant	MODIFIER	NA
rs30661892	2448227402	19	Sec31b	2445830764	2445859671	19	2.28e-20	cis	FALSE	LD_Chr_19_2447624260_2448359008	intron_variant	MODIFIER	NA
rs29251390	1859934098	13	Cmya5	1861089274	1861193285	13	2.33e-20	cis	FALSE	NA	intron_variant	MODIFIER	NA
rs29681105	1859936731	13	Cmya5	1861089274	1861193285	13	2.33e-20	cis	FALSE	LD_Chr_13_1859934098_1859940351	intron_variant	MODIFIER	NA
rs48834616	1859937407	13	Cmya5	1861089274	1861193285	13	2.33e-20	cis	FALSE	LD_Chr_13_1859934098_1859940351	intron_variant	MODIFIER	NA
rs46498099	1859940351	13	Cmya5	1861089274	1861193285	13	2.33e-20	cis	FALSE	NA	intron_variant	MODIFIER	NA
rs30615700	2446309390	19	Arl3	2447844916	2447886892	19	2.33e-20	cis	FALSE	LD_Chr_19_2446256286_2446321251	intron_variant	MODIFIER	NA
rs32156652	174843412	1	Mpz	171150711	171161130	1	2.37e-20	cis	FALSE	LD_Chr_1_174676808_174861038	intron_variant	MODIFIER	+
rs31868924	174844026	1	Mpz	171150711	171161130	1	2.37e-20	cis	FALSE	LD_Chr_1_174676808_174861038	intron_variant	MODIFIER	+
rs32624870	173072839	1	Mpz	171150711	171161130	1	2.39e-20	cis	FALSE	LD_Chr_1_172937148_173340126	upstream_gene_variant	MODIFIER	+
rs46239289	1172878004	8	Gsr	1174798203	1174843843	8	2.4e-20	cis	FALSE	LD_Chr_8_1169938554_1172919220	downstream_gene_variant	MODIFIER	NA
rs48974859	67747444	1	Acadl	66830839	66863277	1	2.5e-20	cis	FALSE	LD_Chr_1_65505631_67985509	intergenic_variant	MODIFIER	NA
rs30221968	1174554536	8	Gsr	1174798203	1174843843	8	2.62e-20	cis	FALSE	LD_Chr_8_1172961821_1182556240	intron_variant	MODIFIER	NA
rs3669245	1174555816	8	Gsr	1174798203	1174843843	8	2.62e-20	cis	FALSE	LD_Chr_8_1172961821_1182556240	intron_variant	MODIFIER	NA
rs30220591	1174580339	8	Gsr	1174798203	1174843843	8	2.62e-20	cis	FALSE	LD_Chr_8_1172961821_1182556240	intergenic_variant	MODIFIER	NA
rs30222911	1174584976	8	Gsr	1174798203	1174843843	8	2.62e-20	cis	FALSE	LD_Chr_8_1172961821_1182556240	intergenic_variant	MODIFIER	NA
rs33144898	1174402146	8	Gsr	1174798203	1174843843	8	2.62e-20	cis	FALSE	LD_Chr_8_1172961821_1182556240	intron_variant	MODIFIER	NA
rs30193238	1174425322	8	Gsr	1174798203	1174843843	8	2.62e-20	cis	FALSE	LD_Chr_8_1172961821_1182556240	intron_variant	MODIFIER	NA
rs30193328	1174444728	8	Gsr	1174798203	1174843843	8	2.62e-20	cis	FALSE	LD_Chr_8_1172961821_1182556240	intron_variant	MODIFIER	NA
rs30194842	1174445876	8	Gsr	1174798203	1174843843	8	2.62e-20	cis	FALSE	LD_Chr_8_1172961821_1182556240	intron_variant	MODIFIER	NA
rs30196253	1174454958	8	Gsr	1174798203	1174843843	8	2.62e-20	cis	FALSE	LD_Chr_8_1172961821_1182556240	intron_variant	MODIFIER	NA
rs30199000	1174456070	8	Gsr	1174798203	1174843843	8	2.62e-20	cis	FALSE	LD_Chr_8_1172961821_1182556240	intron_variant	MODIFIER	NA
rs30212056	1174511652	8	Gsr	1174798203	1174843843	8	2.62e-20	cis	FALSE	LD_Chr_8_1172961821_1182556240	non_coding_transcript_variant	MODIFIER	NA
rs30215008	1174538616	8	Gsr	1174798203	1174843843	8	2.62e-20	cis	FALSE	LD_Chr_8_1172961821_1182556240	intron_variant	MODIFIER	NA
rs30210843	1174548235	8	Gsr	1174798203	1174843843	8	2.62e-20	cis	FALSE	LD_Chr_8_1172961821_1182556240	intron_variant	MODIFIER	NA
rs3694336	1174549590	8	Gsr	1174798203	1174843843	8	2.62e-20	cis	FALSE	LD_Chr_8_1172961821_1182556240	intron_variant	MODIFIER	NA
rs3654047	1174433683	8	Gsr	1174798203	1174843843	8	2.62e-20	cis	FALSE	LD_Chr_8_1172961821_1182556240	intron_variant	MODIFIER	NA
rs3654150	1174433736	8	Gsr	1174798203	1174843843	8	2.62e-20	cis	FALSE	LD_Chr_8_1172961821_1182556240	intron_variant	MODIFIER	NA
rs30197112	1174455353	8	Gsr	1174798203	1174843843	8	2.62e-20	cis	FALSE	LD_Chr_8_1172961821_1182556240	intron_variant	MODIFIER	NA
rs30198005	1174455375	8	Gsr	1174798203	1174843843	8	2.62e-20	cis	FALSE	LD_Chr_8_1172961821_1182556240	intron_variant	MODIFIER	NA
rs30198011	1174455971	8	Gsr	1174798203	1174843843	8	2.62e-20	cis	FALSE	LD_Chr_8_1172961821_1182556240	intron_variant	MODIFIER	NA
rs32686799	1174489262	8	Gsr	1174798203	1174843843	8	2.62e-20	cis	FALSE	LD_Chr_8_1172961821_1182556240	missense_variant	MODERATE	NA
rs32926907	1174489302	8	Gsr	1174798203	1174843843	8	2.62e-20	cis	FALSE	LD_Chr_8_1172961821_1182556240	synonymous_variant	LOW	NA
rs33217140	1174514841	8	Gsr	1174798203	1174843843	8	2.62e-20	cis	FALSE	LD_Chr_8_1172961821_1182556240	non_coding_transcript_variant	MODIFIER	NA
rs6381043	1174527782	8	Gsr	1174798203	1174843843	8	2.62e-20	cis	FALSE	LD_Chr_8_1172961821_1182556240	non_coding_transcript_variant	MODIFIER	NA
rs33194542	1174352924	8	Gsr	1174798203	1174843843	8	2.62e-20	cis	FALSE	LD_Chr_8_1172961821_1182556240	intergenic_variant	MODIFIER	NA
rs3684892	1174553210	8	Gsr	1174798203	1174843843	8	2.62e-20	cis	FALSE	LD_Chr_8_1172961821_1182556240	intron_variant	MODIFIER	NA
rs32549117	1174571908	8	Gsr	1174798203	1174843843	8	2.62e-20	cis	FALSE	LD_Chr_8_1172961821_1182556240	intergenic_variant	MODIFIER	NA
rs33238122	1174571925	8	Gsr	1174798203	1174843843	8	2.62e-20	cis	FALSE	LD_Chr_8_1172961821_1182556240	intergenic_variant	MODIFIER	NA
rs29135854	1683992129	12	Bzw2	1684011374	1684077619	12	2.68e-20	cis	FALSE	LD_Chr_12_1683958290_1686264896	intergenic_variant	MODIFIER	NA
rs37169645	1684024195	12	Bzw2	1684011374	1684077619	12	2.68e-20	cis	TRUE	LD_Chr_12_1683958290_1686264896	non_coding_transcript_variant	MODIFIER	NA
rs29184081	1684076016	12	Bzw2	1684011374	1684077619	12	2.68e-20	cis	TRUE	LD_Chr_12_1683958290_1686264896	non_coding_transcript_variant	MODIFIER	NA
rs29195796	1684106160	12	Bzw2	1684011374	1684077619	12	2.68e-20	cis	FALSE	LD_Chr_12_1683958290_1686264896	non_coding_transcript_variant	MODIFIER	NA
rs29139551	1684106434	12	Bzw2	1684011374	1684077619	12	2.68e-20	cis	FALSE	LD_Chr_12_1683958290_1686264896	non_coding_transcript_exon_variant	MODIFIER	NA
rs29204150	1684106575	12	Bzw2	1684011374	1684077619	12	2.68e-20	cis	FALSE	LD_Chr_12_1683958290_1686264896	non_coding_transcript_variant	MODIFIER	NA
rs45682795	1904596169	14	Oxsm	1904708852	1904720008	14	2.74e-20	cis	FALSE	LD_Chr_14_1898918207_1908130475	intergenic_variant	MODIFIER	NA
rs31504653	1904635702	14	Oxsm	1904708852	1904720008	14	2.74e-20	cis	FALSE	LD_Chr_14_1898918207_1908130475	intergenic_variant	MODIFIER	NA
rs30250076	1904673110	14	Oxsm	1904708852	1904720008	14	2.74e-20	cis	FALSE	LD_Chr_14_1898918207_1908130475	intergenic_variant	MODIFIER	NA
rs32135795	1115954897	7	Crym	1115890601	1115906332	7	2.81e-20	cis	FALSE	LD_Chr_7_1115855973_1118326594	downstream_gene_variant	MODIFIER	NA
rs32471611	1115955549	7	Crym	1115890601	1115906332	7	2.81e-20	cis	FALSE	LD_Chr_7_1115855973_1118326594	intron_variant	MODIFIER	NA
rs32104121	1115945316	7	Crym	1115890601	1115906332	7	2.81e-20	cis	FALSE	LD_Chr_7_1115855973_1118326594	non_coding_transcript_variant	MODIFIER	NA
rs32454682	1115945712	7	Crym	1115890601	1115906332	7	2.81e-20	cis	FALSE	LD_Chr_7_1115855973_1118326594	intron_variant	MODIFIER	NA
rs31088162	1115945793	7	Crym	1115890601	1115906332	7	2.81e-20	cis	FALSE	LD_Chr_7_1115855973_1118326594	intron_variant	MODIFIER	NA
rs32613337	1115955400	7	Crym	1115890601	1115906332	7	2.81e-20	cis	FALSE	LD_Chr_7_1115855973_1118326594	downstream_gene_variant	MODIFIER	NA
rs33803099	174555849	1	Mpz	171150711	171161130	1	2.96e-20	cis	FALSE	NA	non_coding_transcript_variant	MODIFIER	+
rs6340234	66210075	1	Acadl	66830839	66863277	1	2.96e-20	cis	FALSE	LD_Chr_1_65505631_67985509	intron_variant	MODIFIER	NA
rs30081981	1376444603	9	Acy1	1376979874	1376985212	9	3.24e-20	cis	FALSE	LD_Chr_9_1376309766_1376953147	intron_variant	MODIFIER	NA
rs3686391	1860812765	13	Cmya5	1861089274	1861193285	13	3.31e-20	cis	FALSE	LD_Chr_13_1860757122_1861913824	intron_variant	MODIFIER	NA
rs37383640	135492384	1	Ppp1r12b	134754658	134955942	1	3.35e-20	cis	FALSE	LD_Chr_1_135328566_137777833	non_coding_transcript_variant	MODIFIER	NA
rs31520204	2091622351	15	Mpst	2091778860	2091786457	15	3.43e-20	cis	FALSE	LD_Chr_15_2091454134_2091782818	intron_variant	MODIFIER	NA
rs33775950	2240984885	17	Fahd1	2240472789	2240474261	17	3.43e-20	cis	FALSE	LD_Chr_17_2240361950_2241076094	intergenic_variant	MODIFIER	NA
rs31633931	175298245	1	Mpz	171150711	171161130	1	3.45e-20	cis	FALSE	LD_Chr_1_175054333_175440535	intron_variant	MODIFIER	+
rs8270851	135283198	1	Ppp1r12b	134754658	134955942	1	3.52e-20	cis	FALSE	LD_Chr_1_134653566_135312467	upstream_gene_variant	MODIFIER	NA
rs30290452	1175950030	8	Gsr	1174798203	1174843843	8	3.56e-20	cis	FALSE	LD_Chr_8_1172961821_1182556240	upstream_gene_variant	MODIFIER	NA
rs32526726	175385365	1	Mpz	171150711	171161130	1	3.6e-20	cis	FALSE	LD_Chr_1_175054333_175440535	intron_variant	MODIFIER	+
rs30482219	1376467661	9	Acy1	1376979874	1376985212	9	3.75e-20	cis	FALSE	LD_Chr_9_1376309766_1376953147	intron_variant	MODIFIER	NA
rs33670731	1376417976	9	Acy1	1376979874	1376985212	9	3.75e-20	cis	FALSE	LD_Chr_9_1376309766_1376953147	intron_variant	MODIFIER	NA
rs36381800	1376345209	9	Acy1	1376979874	1376985212	9	3.75e-20	cis	FALSE	LD_Chr_9_1376309766_1376953147	intron_variant	MODIFIER	NA
rs29250774	1860772451	13	Cmya5	1861089274	1861193285	13	3.83e-20	cis	FALSE	LD_Chr_13_1860757122_1861913824	downstream_gene_variant	MODIFIER	NA
rs50305085	2298662724	17	Cox7a2l	2299125815	2299141227	17	3.95e-20	cis	FALSE	LD_Chr_17_2298183073_2298694324	non_coding_transcript_variant	MODIFIER	NA
rs31635247	175269981	1	Mpz	171150711	171161130	1	3.95e-20	cis	FALSE	LD_Chr_1_175054333_175440535	intron_variant	MODIFIER	+
rs31885491	174976368	1	Mpz	171150711	171161130	1	3.95e-20	cis	FALSE	LD_Chr_1_174941203_174981277	intergenic_variant	MODIFIER	+
rs33804017	174676808	1	Mpz	171150711	171161130	1	3.95e-20	cis	FALSE	NA	non_coding_transcript_variant	MODIFIER	+
rs27545047	676279292	4	Aldh4a1	677247741	677274565	4	4.01e-20	cis	FALSE	LD_Chr_4_676163577_676576704	intergenic_variant	MODIFIER	NA
rs27547620	676801998	4	Aldh4a1	677247741	677274565	4	4.01e-20	cis	FALSE	LD_Chr_4_676629220_677256778	non_coding_transcript_variant	MODIFIER	NA
rs31204646	2449038628	19	Arl3	2447844916	2447886892	19	4.05e-20	cis	FALSE	LD_Chr_19_2448963638_2449070502	downstream_gene_variant	MODIFIER	NA
rs36924193	2445798873	19	Sec31b	2445830764	2445859671	19	4.1e-20	cis	FALSE	LD_Chr_19_2445693208_2446246532	intergenic_variant	MODIFIER	NA
rs33786587	174170805	1	Mpz	171150711	171161130	1	4.19e-20	cis	FALSE	LD_Chr_1_174149042_174219722	upstream_gene_variant	MODIFIER	+
rs33780877	174211021	1	Mpz	171150711	171161130	1	4.19e-20	cis	FALSE	LD_Chr_1_174149042_174219722	upstream_gene_variant	MODIFIER	+
rs47918703	2298551751	17	Cox7a2l	2299125815	2299141227	17	4.22e-20	cis	FALSE	LD_Chr_17_2298183073_2298694324	intergenic_variant	MODIFIER	NA
rs30278805	1175884466	8	Gsr	1174798203	1174843843	8	4.22e-20	cis	FALSE	LD_Chr_8_1172961821_1182556240	intergenic_variant	MODIFIER	NA
rs6175813	160836714	1	Prdx6	161240112	161251219	1	4.3e-20	cis	FALSE	LD_Chr_1_160822566_160839232	upstream_gene_variant	MODIFIER	NA
rs33806781	174431904	1	Mpz	171150711	171161130	1	4.37e-20	cis	FALSE	LD_Chr_1_174357974_174466191	downstream_gene_variant	MODIFIER	+
rs48890779	1904785054	14	Oxsm	1904708852	1904720008	14	4.44e-20	cis	FALSE	LD_Chr_14_1898918207_1908130475	downstream_gene_variant	MODIFIER	NA
rs47281433	1904233977	14	Oxsm	1904708852	1904720008	14	4.44e-20	cis	FALSE	LD_Chr_14_1898918207_1908130475	non_coding_transcript_variant	MODIFIER	NA
rs50619088	1904338993	14	Oxsm	1904708852	1904720008	14	4.44e-20	cis	FALSE	LD_Chr_14_1898918207_1908130475	non_coding_transcript_variant	MODIFIER	NA
rs50183286	1904402482	14	Oxsm	1904708852	1904720008	14	4.44e-20	cis	FALSE	LD_Chr_14_1898918207_1908130475	intergenic_variant	MODIFIER	NA
rs30749679	1903990535	14	Oxsm	1904708852	1904720008	14	4.44e-20	cis	FALSE	LD_Chr_14_1898918207_1908130475	intergenic_variant	MODIFIER	NA
rs50788881	1904165907	14	Oxsm	1904708852	1904720008	14	4.44e-20	cis	FALSE	LD_Chr_14_1898918207_1908130475	downstream_gene_variant	MODIFIER	NA
rs30162569	1904247792	14	Oxsm	1904708852	1904720008	14	4.44e-20	cis	FALSE	LD_Chr_14_1898918207_1908130475	non_coding_transcript_variant	MODIFIER	NA
rs31103577	1903995193	14	Oxsm	1904708852	1904720008	14	4.44e-20	cis	FALSE	LD_Chr_14_1898918207_1908130475	intergenic_variant	MODIFIER	NA
rs30251320	1904131133	14	Oxsm	1904708852	1904720008	14	4.44e-20	cis	FALSE	LD_Chr_14_1898918207_1908130475	intergenic_variant	MODIFIER	NA
rs36795603	1175442915	8	Gsr	1174798203	1174843843	8	4.47e-20	cis	FALSE	LD_Chr_8_1172961821_1182556240	upstream_gene_variant	MODIFIER	NA
rs30412015	2446018838	19	Arl3	2447844916	2447886892	19	4.52e-20	cis	FALSE	LD_Chr_19_2445693208_2446246532	intergenic_variant	MODIFIER	NA
rs31027761	173370918	1	Mpz	171150711	171161130	1	4.56e-20	cis	FALSE	LD_Chr_1_173370140_173679184	upstream_gene_variant	MODIFIER	+
rs30845025	134743154	1	Ppp1r12b	134754658	134955942	1	4.65e-20	cis	FALSE	LD_Chr_1_134653566_135312467	intron_variant	MODIFIER	NA
rs30229731	1174811852	8	Gsr	1174798203	1174843843	8	4.66e-20	cis	TRUE	LD_Chr_8_1172961821_1182556240	non_coding_transcript_variant	MODIFIER	NA
rs37239643	1175734961	8	Gsr	1174798203	1174843843	8	4.66e-20	cis	FALSE	LD_Chr_8_1172961821_1182556240	downstream_gene_variant	MODIFIER	NA
rs29165538	1684027328	12	Bzw2	1684011374	1684077619	12	4.69e-20	cis	TRUE	LD_Chr_12_1683958290_1686264896	non_coding_transcript_variant	MODIFIER	NA
rs36722823	2445798919	19	Arl3	2447844916	2447886892	19	4.98e-20	cis	FALSE	LD_Chr_19_2445693208_2446246532	intergenic_variant	MODIFIER	NA
rs36732262	2445799300	19	Arl3	2447844916	2447886892	19	4.98e-20	cis	FALSE	LD_Chr_19_2445693208_2446246532	intergenic_variant	MODIFIER	NA
rs30853051	2445837323	19	Arl3	2447844916	2447886892	19	4.98e-20	cis	FALSE	LD_Chr_19_2445693208_2446246532	intron_variant	MODIFIER	NA
rs30404095	2445837396	19	Arl3	2447844916	2447886892	19	4.98e-20	cis	FALSE	LD_Chr_19_2445693208_2446246532	intron_variant	MODIFIER	NA
rs31121161	2445634419	19	Arl3	2447844916	2447886892	19	4.98e-20	cis	FALSE	NA	downstream_gene_variant	MODIFIER	NA
rs30519034	2445693208	19	Arl3	2447844916	2447886892	19	4.98e-20	cis	FALSE	NA	intergenic_variant	MODIFIER	NA
rs30417795	2445702297	19	Arl3	2447844916	2447886892	19	4.98e-20	cis	FALSE	LD_Chr_19_2445693208_2446246532	intergenic_variant	MODIFIER	NA
rs30366368	2445743263	19	Arl3	2447844916	2447886892	19	4.98e-20	cis	FALSE	LD_Chr_19_2445693208_2446246532	non_coding_transcript_variant	MODIFIER	NA
rs30368451	2445743412	19	Arl3	2447844916	2447886892	19	4.98e-20	cis	FALSE	LD_Chr_19_2445693208_2446246532	non_coding_transcript_variant	MODIFIER	NA
rs37227324	2445798386	19	Arl3	2447844916	2447886892	19	4.98e-20	cis	FALSE	LD_Chr_19_2445693208_2446246532	intergenic_variant	MODIFIER	NA
rs39040908	2445816066	19	Arl3	2447844916	2447886892	19	4.98e-20	cis	FALSE	LD_Chr_19_2445693208_2446246532	intron_variant	MODIFIER	NA
rs37934386	2445834339	19	Arl3	2447844916	2447886892	19	4.98e-20	cis	FALSE	LD_Chr_19_2445693208_2446246532	synonymous_variant	LOW	NA
rs30598842	2445837767	19	Arl3	2447844916	2447886892	19	4.98e-20	cis	FALSE	LD_Chr_19_2445693208_2446246532	intron_variant	MODIFIER	NA
rs30900088	2445701698	19	Arl3	2447844916	2447886892	19	4.98e-20	cis	FALSE	LD_Chr_19_2445693208_2446246532	intergenic_variant	MODIFIER	NA
rs30407960	2445703954	19	Arl3	2447844916	2447886892	19	4.98e-20	cis	FALSE	LD_Chr_19_2445693208_2446246532	downstream_gene_variant	MODIFIER	NA
[truncated: 119,106 more rows]
