# Supplementary material for: Proteome-wide systems genetics identifies UFMylation as a regulator of skeletal muscle function
Source: eLife. 2022 Dec 6;11:e82951. doi: 10.7554/eLife.82951 (PMC9833826; doi:10.7554/eLife.82951)
Supplement: Supplementary file 3. — Protein-protein correlation as determined using biweight midcorrelation. p-Values and q-values derived using the Benjamini-Hochberg procedure, and only positive correlations are shown (cor > 0.3 and q < 0.05). Correlated protein pairs are annotated with protein:protein interactions from the CORUM and BioPlex databases, and subcellar. Related to Figures 1 and 2. [file elife-82951-supp3.xlsx]

## Sheet: Sheet1
varID1	varID2	VarVar	cor	pval	qval	ComplexID	ComplexName	inCORUM	pW	inBioplex	linkscore	loc1	loc2	overlap.loc	share.loc
neb	myh4	myh4_neb	0.912139	7.31186e-64	9.20957e-59	NA	NA	FALSE	NA	FALSE	592	NA	NA		FALSE
dmd	myh4	dmd_myh4	0.586292	2.46749e-16	8.34012e-14	NA	NA	FALSE	NA	FALSE	533	NA	NA		FALSE
myom1	myh4	myh4_myom1	0.777589	4.63151e-34	3.5783e-30	NA	NA	FALSE	NA	FALSE	807	NA	NA		FALSE
dync1h1	myh4	dync1h1_myh4	0.403861	9.86028e-08	3.53268e-06	NA	NA	FALSE	NA	FALSE	231	Centrosome;Cytosol	NA		FALSE
clip1	myh4	clip1_myh4	0.306077	7.46213e-05	0.000927873	NA	NA	FALSE	NA	FALSE	232	Microtubule ends;Microtubules;Cytoskeleton;Cytosol	NA		FALSE
ugp2	myh4	myh4_ugp2	0.38275	4.99169e-07	1.41612e-05	NA	NA	FALSE	NA	FALSE	NA	Centrosome;Mitochondria;Cytoplasm	NA		FALSE
gpd2	myh4	gpd2_myh4	0.513445	2.81444e-12	3.66677e-10	NA	NA	FALSE	NA	FALSE	NA	NA	NA		FALSE
pgm2	myh4	myh4_pgm2	0.717245	6.92528e-27	1.75284e-23	NA	NA	FALSE	NA	FALSE	NA	Intermediate filaments	NA		FALSE
anxa6	myh4	anxa6_myh4	0.404633	9.27255e-08	3.35129e-06	NA	NA	FALSE	NA	FALSE	NA	Nuclear speckles;Nucleoplasm;Nucleus	NA		FALSE
anxa6	myh4	anxa6_myh4	0.404633	9.27255e-08	3.35129e-06	NA	NA	FALSE	NA	FALSE	NA	Nuclear speckles;Nucleoplasm;Nucleus	NA		FALSE
lamc1	myh4	lamc1_myh4	0.418271	3.05006e-08	1.28611e-06	NA	NA	FALSE	NA	FALSE	NA	Endoplasmic reticulum;Cytoplasm;Plasma membrane	NA		FALSE
gpi1	myh4	gpi1_myh4	0.682754	1.42971e-23	2.00998e-20	NA	NA	FALSE	NA	FALSE	NA	NA	NA		FALSE
lamb1	myh4	lamb1_myh4	0.359115	2.69361e-06	5.90578e-05	NA	NA	FALSE	NA	FALSE	NA	NA	NA		FALSE
mylpf	myh4	myh4_mylpf	0.795617	1.17399e-36	1.30221e-32	NA	NA	FALSE	NA	FALSE	966	NA	NA		FALSE
ecpas	myh4	ecpas_myh4	0.426455	1.52768e-08	7.06941e-07	NA	NA	FALSE	NA	FALSE	NA	NA	NA		FALSE
cand2	myh4	cand2_myh4	0.364066	1.9132e-06	4.4258e-05	NA	NA	FALSE	NA	FALSE	NA	Nuclear bodies;Nucleoplasm;Nucleus	NA		FALSE
pvalb	myh4	myh4_pvalb	0.555443	1.70326e-14	3.80563e-12	NA	NA	FALSE	NA	FALSE	590	Nucleoplasm;Nucleus	NA		FALSE
aldoart1	myh4	aldoart1_myh4	0.479078	1.12546e-10	9.61692e-09	NA	NA	FALSE	NA	FALSE	NA	NA	NA		FALSE
phkb	myh4	myh4_phkb	0.6148	3.23991e-18	1.64139e-15	NA	NA	FALSE	NA	FALSE	NA	Golgi apparatus;Cytoplasm	NA		FALSE
adssl1	myh4	adssl1_myh4	0.776059	7.49641e-34	5.60182e-30	NA	NA	FALSE	NA	FALSE	NA	NA	NA		FALSE
cacna1s	myh4	cacna1s_myh4	0.766712	1.31024e-32	8.10746e-29	NA	NA	FALSE	NA	FALSE	232	NA	NA		FALSE
synpo2	myh4	myh4_synpo2	0.365685	1.70857e-06	4.02363e-05	NA	NA	FALSE	NA	FALSE	193	Vesicles;Actin filaments;Cytoskeleton;Cytosol	NA		FALSE
casq1	myh4	casq1_myh4	0.809324	8.21752e-39	1.24073e-34	NA	NA	FALSE	NA	FALSE	432	Nucleoplasm;Nucleus;Mitochondria;Cytoplasm	NA		FALSE
gpd1	myh4	gpd1_myh4	0.626172	5.07618e-19	3.03812e-16	NA	NA	FALSE	NA	FALSE	NA	NA	NA		FALSE
gys1	myh4	gys1_myh4	0.499362	1.34118e-11	1.46688e-09	NA	NA	FALSE	NA	FALSE	171	Microtubules;Cytosol	NA		FALSE
myoz1	myh4	myh4_myoz1	0.821298	7.66181e-41	1.52797e-36	NA	NA	FALSE	NA	FALSE	530	NA	NA		FALSE
ldha	myh4	ldha_myh4	0.554128	2.02074e-14	4.43587e-12	NA	NA	FALSE	NA	FALSE	NA	Cytosol	NA		FALSE
npepps	myh4	myh4_npepps	0.311665	5.41041e-05	0.000713677	NA	NA	FALSE	NA	FALSE	NA	Cytosol	NA		FALSE
sugt1	myh4	myh4_sugt1	0.420561	2.51822e-08	1.0895e-06	NA	NA	FALSE	NA	FALSE	161	Nucleoplasm;Nucleus;Cytosol	NA		FALSE
ppp5c	myh4	myh4_ppp5c	0.406454	8.01606e-08	2.95785e-06	NA	NA	FALSE	NA	FALSE	175	Vesicles;Cytosol	NA		FALSE
psmd7	myh4	myh4_psmd7	0.351571	4.48752e-06	9.06881e-05	NA	NA	FALSE	NA	FALSE	NA	Nucleoplasm;Nucleus	NA		FALSE
cops3	myh4	cops3_myh4	0.496765	1.77483e-11	1.88019e-09	NA	NA	FALSE	NA	FALSE	NA	Nucleus	NA		FALSE
rab18	myh4	myh4_rab18	0.404334	9.49602e-08	3.4199e-06	NA	NA	FALSE	NA	FALSE	NA	NA	NA		FALSE
gps1	myh4	gps1_myh4	0.371339	1.14538e-06	2.86817e-05	NA	NA	FALSE	NA	FALSE	NA	NA	NA		FALSE
sirt2	myh4	myh4_sirt2	0.315313	4.37075e-05	0.000599425	NA	NA	FALSE	NA	FALSE	NA	Nucleoli;Nucleus	NA		FALSE
glrx3	myh4	glrx3_myh4	0.369776	1.28018e-06	3.15096e-05	NA	NA	FALSE	NA	FALSE	NA	NA	NA		FALSE
ddx19a	myh4	ddx19a_myh4	0.301191	9.83299e-05	0.00116177	NA	NA	FALSE	NA	FALSE	NA	Nucleoplasm;Nucleus	NA		FALSE
rabggta	myh4	myh4_rabggta	0.3459	6.52989e-06	0.000124123	NA	NA	FALSE	NA	FALSE	NA	Nucleoplasm;Nucleus	NA		FALSE
hint1	myh4	hint1_myh4	0.308202	6.60833e-05	0.000840245	NA	NA	FALSE	NA	FALSE	NA	Cytosol	NA		FALSE
macrod1	myh4	macrod1_myh4	0.428189	1.31642e-08	6.21674e-07	NA	NA	FALSE	NA	FALSE	NA	Nucleoplasm;Nucleus	NA		FALSE
cobl	myh4	cobl_myh4	0.429388	1.18713e-08	5.68266e-07	NA	NA	FALSE	NA	FALSE	NA	Cell Junctions;Plasma membrane	NA		FALSE
prune1	myh4	myh4_prune1	0.613072	4.26615e-18	2.10764e-15	NA	NA	FALSE	NA	FALSE	NA	NA	NA		FALSE
cab39	myh4	cab39_myh4	0.418312	3.03946e-08	1.28219e-06	NA	NA	FALSE	NA	FALSE	NA	Nucleoli;Nucleus	NA		FALSE
map2k4	myh4	map2k4_myh4	0.589085	1.6446e-16	5.78655e-14	NA	NA	FALSE	NA	FALSE	309	Nucleoplasm;Nucleus	NA		FALSE
lactb	myh4	lactb_myh4	0.39745	1.63305e-07	5.44915e-06	NA	NA	FALSE	NA	FALSE	NA	Mitochondria;Cytoplasm	NA		FALSE
prdx2	myh4	myh4_prdx2	0.306645	7.22433e-05	0.000903631	NA	NA	FALSE	NA	FALSE	NA	NA	NA		FALSE
sar1a	myh4	myh4_sar1a	0.509986	4.15738e-12	5.19103e-10	NA	NA	FALSE	NA	FALSE	NA	Endoplasmic reticulum;Cytoplasm	NA		FALSE
smyd2	myh4	myh4_smyd2	0.474484	1.7876e-10	1.44677e-08	NA	NA	FALSE	NA	FALSE	NA	Cytosol	NA		FALSE
carns1	myh4	carns1_myh4	0.373463	9.83615e-07	2.52059e-05	NA	NA	FALSE	NA	FALSE	NA	NA	NA		FALSE
uba3	myh4	myh4_uba3	0.319875	3.33398e-05	0.000479981	NA	NA	FALSE	NA	FALSE	NA	Cytosol;Plasma membrane	NA		FALSE
cpped1	myh4	cpped1_myh4	0.389367	3.03885e-07	9.27065e-06	NA	NA	FALSE	NA	FALSE	NA	Cytosol	NA		FALSE
tbc1d1	myh4	myh4_tbc1d1	0.384899	4.25359e-07	1.23582e-05	NA	NA	FALSE	NA	FALSE	NA	Nucleoli;Nucleus	NA		FALSE
ccdc47	myh4	ccdc47_myh4	0.354115	3.78328e-06	7.85873e-05	NA	NA	FALSE	NA	FALSE	NA	Endoplasmic reticulum;Cytoplasm	NA		FALSE
itpa	myh4	itpa_myh4	0.527489	5.51437e-13	8.58203e-11	NA	NA	FALSE	NA	FALSE	NA	Cytosol	NA		FALSE
chchd3	myh4	chchd3_myh4	0.363697	1.96296e-06	4.52327e-05	NA	NA	FALSE	NA	FALSE	NA	Mitochondria;Cytoplasm	NA		FALSE
nek9	myh4	myh4_nek9	0.406439	8.02566e-08	2.96087e-06	NA	NA	FALSE	NA	FALSE	174	Mitochondria;Cytoplasm	NA		FALSE
nt5c1a	myh4	myh4_nt5c1a	0.32946	1.86051e-05	0.000296569	NA	NA	FALSE	NA	FALSE	NA	NA	NA		FALSE
psmb5	myh4	myh4_psmb5	0.329083	1.90438e-05	0.000302299	NA	NA	FALSE	NA	FALSE	NA	Nucleus;Centrosome	NA		FALSE
atp1b2	myh4	atp1b2_myh4	0.388131	3.33692e-07	1.00424e-05	NA	NA	FALSE	NA	FALSE	NA	NA	NA		FALSE
mlec	myh4	mlec_myh4	0.397332	1.64806e-07	5.49201e-06	NA	NA	FALSE	NA	FALSE	NA	NA	NA		FALSE
hdhd2	myh4	hdhd2_myh4	0.455945	1.08049e-09	7.02045e-08	NA	NA	FALSE	NA	FALSE	NA	Vesicles	NA		FALSE
ubac1	myh4	myh4_ubac1	0.484914	6.18987e-11	5.67434e-09	NA	NA	FALSE	NA	FALSE	NA	Cytosol;Plasma membrane	NA		FALSE
pip4k2b	myh4	myh4_pip4k2b	0.327098	2.15197e-05	0.000334506	NA	NA	FALSE	NA	FALSE	NA	Nucleoplasm;Nucleus	NA		FALSE
hhatl	myh4	hhatl_myh4	0.528736	4.75367e-13	7.51508e-11	NA	NA	FALSE	NA	FALSE	NA	NA	NA		FALSE
ykt6	myh4	myh4_ykt6	0.445323	2.88861e-09	1.65852e-07	NA	NA	FALSE	NA	FALSE	NA	Cytosol	NA		FALSE
otub1	myh4	myh4_otub1	0.607183	1.07605e-17	4.8778e-15	NA	NA	FALSE	NA	FALSE	NA	Nucleus;Cytosol	NA		FALSE
skp1a	myh4	myh4_skp1a	0.42555	1.65059e-08	7.55812e-07	NA	NA	FALSE	NA	FALSE	NA	NA	NA		FALSE
cisd1	myh4	cisd1_myh4	0.482481	7.95253e-11	7.07776e-09	NA	NA	FALSE	NA	FALSE	NA	Mitochondria;Cytoplasm	NA		FALSE
prkag1	myh4	myh4_prkag1	0.447733	2.31787e-09	1.36778e-07	NA	NA	FALSE	NA	FALSE	NA	Nucleoplasm;Nucleus;Cytosol	NA		FALSE
kyat1	myh4	kyat1_myh4	0.403133	1.04471e-07	3.71322e-06	NA	NA	FALSE	NA	FALSE	NA	NA	NA		FALSE
sod1	myh4	myh4_sod1	0.315275	4.38053e-05	0.000600539	NA	NA	FALSE	NA	FALSE	NA	Nucleus;Cytosol;Plasma membrane	NA		FALSE
nae1	myh4	myh4_nae1	0.436201	6.5453e-09	3.38536e-07	NA	NA	FALSE	NA	FALSE	NA	Nucleus	NA		FALSE
impad1	myh4	impad1_myh4	0.485813	5.63969e-11	5.22563e-09	NA	NA	FALSE	NA	FALSE	NA	Golgi apparatus;Cytoplasm	NA		FALSE
preb	myh4	myh4_preb	0.324865	2.46678e-05	0.000374445	NA	NA	FALSE	NA	FALSE	NA	Endoplasmic reticulum;Cytoplasm	NA		FALSE
crot	myh4	crot_myh4	0.583783	3.54124e-16	1.15698e-13	NA	NA	FALSE	NA	FALSE	NA	Vesicles	NA		FALSE
sun1	myh4	myh4_sun1	0.433791	8.09181e-09	4.07091e-07	NA	NA	FALSE	NA	FALSE	NA	Nuclear membrane;Nucleus	NA		FALSE
sypl2	myh4	myh4_sypl2	0.536994	1.752e-13	3.08342e-11	NA	NA	FALSE	NA	FALSE	NA	Nucleoplasm;Nucleus	NA		FALSE
cops6	myh4	cops6_myh4	0.429246	1.20173e-08	5.74265e-07	NA	NA	FALSE	NA	FALSE	NA	Nucleoplasm;Nucleus	NA		FALSE
mapk9	myh4	mapk9_myh4	0.46239	5.85147e-10	4.10151e-08	NA	NA	FALSE	NA	FALSE	NA	NA	NA		FALSE
mdp1	myh4	mdp1_myh4	0.385863	3.95761e-07	1.16227e-05	NA	NA	FALSE	NA	FALSE	NA	Nucleoplasm;Nucleus	NA		FALSE
carnmt1	myh4	carnmt1_myh4	0.333268	1.46751e-05	0.000243697	NA	NA	FALSE	NA	FALSE	NA	NA	NA		FALSE
psma4	myh4	myh4_psma4	0.355465	3.45372e-06	7.27961e-05	NA	NA	FALSE	NA	FALSE	NA	Nucleus;Cytosol	NA		FALSE
arih1	myh4	arih1_myh4	0.434154	7.83795e-09	3.95891e-07	NA	NA	FALSE	NA	FALSE	292	Golgi apparatus;Cytoplasm	NA		FALSE
akr7a5	myh4	akr7a5_myh4	0.353668	3.89885e-06	8.05908e-05	NA	NA	FALSE	NA	FALSE	NA	NA	NA		FALSE
ube2l3	myh4	myh4_ube2l3	0.610703	6.20447e-18	2.96517e-15	NA	NA	FALSE	NA	FALSE	NA	Nucleus;Cytosol	NA		FALSE
tmem38a	myh4	myh4_tmem38a	0.386376	3.80839e-07	1.12463e-05	NA	NA	FALSE	NA	FALSE	169	Nucleus	NA		FALSE
vapa	myh4	myh4_vapa	0.410406	5.82622e-08	2.24695e-06	NA	NA	FALSE	NA	FALSE	NA	Endoplasmic reticulum;Cytoplasm	NA		FALSE
setd7	myh4	myh4_setd7	0.473909	1.89324e-10	1.52178e-08	NA	NA	FALSE	NA	FALSE	NA	Nucleoli;Nucleus	NA		FALSE
prkcq	myh4	myh4_prkcq	0.314207	4.66433e-05	0.000632169	NA	NA	FALSE	NA	FALSE	NA	Microtubule organizing center;Cytoskeleton	NA		FALSE
eloc	myh4	eloc_myh4	0.36833	1.41834e-06	3.43631e-05	NA	NA	FALSE	NA	FALSE	NA	NA	NA		FALSE
apip	myh4	apip_myh4	0.373665	9.6944e-07	2.48977e-05	NA	NA	FALSE	NA	FALSE	NA	Nucleoplasm;Nucleus	NA		FALSE
stk38	myh4	myh4_stk38	0.344722	7.05289e-06	0.000132385	NA	NA	FALSE	NA	FALSE	244	Cytosol	NA		FALSE
sgcd	myh4	myh4_sgcd	0.416742	3.46345e-08	1.43532e-06	NA	NA	FALSE	NA	FALSE	NA	NA	NA		FALSE
nek7	myh4	myh4_nek7	0.418907	2.89231e-08	1.22858e-06	NA	NA	FALSE	NA	FALSE	NA	Nucleoplasm;Nucleus	NA		FALSE
ttc37	myh4	myh4_ttc37	0.33045	1.74971e-05	0.000281895	NA	NA	FALSE	NA	FALSE	NA	Nucleoplasm;Nucleus	NA		FALSE
phpt1	myh4	myh4_phpt1	0.336444	1.20121e-05	0.000206348	NA	NA	FALSE	NA	FALSE	NA	Cytosol	NA		FALSE
prmt1	myh4	myh4_prmt1	0.442141	3.85295e-09	2.13294e-07	NA	NA	FALSE	NA	FALSE	NA	Nucleoplasm;Nucleus	NA		FALSE
mettl26	myh4	mettl26_myh4	0.348653	5.44778e-06	0.000106639	NA	NA	FALSE	NA	FALSE	NA	NA	NA		FALSE
psmb7	myh4	myh4_psmb7	0.376794	7.73094e-07	2.05485e-05	NA	NA	FALSE	NA	FALSE	NA	Nucleoplasm;Nucleus	NA		FALSE
tatdn1	myh4	myh4_tatdn1	0.321147	3.08902e-05	0.000450811	NA	NA	FALSE	NA	FALSE	NA	Nucleoplasm;Nucleus	NA		FALSE
thnsl2	myh4	myh4_thnsl2	0.34677	6.16777e-06	0.000118336	NA	NA	FALSE	NA	FALSE	NA	NA	NA		FALSE
nutf2	myh4	myh4_nutf2	0.665894	4.12151e-22	4.47213e-19	NA	NA	FALSE	NA	FALSE	NA	Microtubules	NA		FALSE
fnta	myh4	fnta_myh4	0.52573	6.79158e-13	1.03347e-10	NA	NA	FALSE	NA	FALSE	NA	Cytosol	NA		FALSE
slc37a4	myh4	myh4_slc37a4	0.339286	1.00223e-05	0.000177486	NA	NA	FALSE	NA	FALSE	NA	Mitochondria;Cytoplasm	NA		FALSE
psma3	myh4	myh4_psma3	0.323907	2.61471e-05	0.000392942	NA	NA	FALSE	NA	FALSE	NA	NA	NA		FALSE
acp1	myh4	acp1_myh4	0.32397	2.60483e-05	0.000391724	NA	NA	FALSE	NA	FALSE	NA	Nucleus	NA		FALSE
acp1	myh4	acp1_myh4	0.32397	2.60483e-05	0.000391724	NA	NA	FALSE	NA	FALSE	NA	Nucleus	NA		FALSE
eml2	myh4	eml2_myh4	0.32923	1.88714e-05	0.000300056	NA	NA	FALSE	NA	FALSE	NA	Vesicles	NA		FALSE
lypla1	myh4	lypla1_myh4	0.561425	7.75261e-15	1.8739e-12	NA	NA	FALSE	NA	FALSE	NA	Cytosol	NA		FALSE
cops8	myh4	cops8_myh4	0.333937	1.40716e-05	0.000235288	NA	NA	FALSE	NA	FALSE	NA	Nucleoplasm;Nucleus	NA		FALSE
prps1l3	myh4	myh4_prps1l3	0.565465	4.51589e-15	1.15266e-12	NA	NA	FALSE	NA	FALSE	NA	NA	NA		FALSE
faf1	myh4	faf1_myh4	0.422362	2.16381e-08	9.55323e-07	NA	NA	FALSE	NA	FALSE	NA	Nucleus	NA		FALSE
psmd8	myh4	myh4_psmd8	0.301474	9.67811e-05	0.00114693	NA	NA	FALSE	NA	FALSE	NA	Cytosol	NA		FALSE
ube2n	myh4	myh4_ube2n	0.498417	1.48554e-11	1.60581e-09	NA	NA	FALSE	NA	FALSE	NA	Nucleus	NA		FALSE
rrm1	myh4	myh4_rrm1	0.358225	2.8627e-06	6.21564e-05	NA	NA	FALSE	NA	FALSE	NA	Cytosol	NA		FALSE
pfn2	myh4	myh4_pfn2	0.477668	1.29805e-10	1.09073e-08	NA	NA	FALSE	NA	FALSE	225	NA	NA		FALSE
clcn1	myh4	clcn1_myh4	0.538888	1.38815e-13	2.50369e-11	NA	NA	FALSE	NA	FALSE	200	NA	NA		FALSE
asph	myh4	asph_myh4	0.557016	1.3869e-14	3.16318e-12	NA	NA	FALSE	NA	FALSE	NA	Endoplasmic reticulum;Cytoplasm	NA		FALSE
asph	myh4	asph_myh4	0.557016	1.3869e-14	3.16318e-12	NA	NA	FALSE	NA	FALSE	NA	Endoplasmic reticulum;Cytoplasm	NA		FALSE
asph	myh4	asph_myh4	0.557016	1.3869e-14	3.16318e-12	NA	NA	FALSE	NA	FALSE	NA	Endoplasmic reticulum;Cytoplasm	NA		FALSE
tecr	myh4	myh4_tecr	0.677789	3.93734e-23	5.114e-20	NA	NA	FALSE	NA	FALSE	NA	Endoplasmic reticulum;Cytoplasm	NA		FALSE
cdv3	myh4	cdv3_myh4	0.300932	9.97641e-05	0.00117552	NA	NA	FALSE	NA	FALSE	NA	Cytosol	NA		FALSE
isoc1	myh4	isoc1_myh4	0.32634	2.25442e-05	0.000347576	NA	NA	FALSE	NA	FALSE	NA	Endoplasmic reticulum;Cytoplasm;Vesicles	NA		FALSE
parvb	myh4	myh4_parvb	0.412797	4.79409e-08	1.89933e-06	NA	NA	FALSE	NA	FALSE	NA	Cytosol	NA		FALSE
ano10	myh4	ano10_myh4	0.323467	2.68546e-05	0.000401674	NA	NA	FALSE	NA	FALSE	NA	NA	NA		FALSE
mospd1	myh4	mospd1_myh4	0.40413	9.6513e-08	3.46798e-06	NA	NA	FALSE	NA	FALSE	NA	Nucleoplasm;Nucleus;Vesicles	NA		FALSE
gsk3b	myh4	gsk3b_myh4	0.343074	7.85125e-06	0.000144763	NA	NA	FALSE	NA	FALSE	NA	Nucleus	NA		FALSE
psmb3	myh4	myh4_psmb3	0.466544	3.91432e-10	2.88113e-08	NA	NA	FALSE	NA	FALSE	NA	NA	NA		FALSE
psmb6	myh4	myh4_psmb6	0.404515	9.35996e-08	3.37808e-06	NA	NA	FALSE	NA	FALSE	NA	Nucleoplasm;Nucleus	NA		FALSE
sdr39u1	myh4	myh4_sdr39u1	0.319705	3.36804e-05	0.000483999	NA	NA	FALSE	NA	FALSE	NA	Nucleoplasm;Nucleus;Cytosol	NA		FALSE
epdr1	myh4	epdr1_myh4	0.309922	5.98512e-05	0.000775065	NA	NA	FALSE	NA	FALSE	NA	NA	NA		FALSE
pdcd5	myh4	myh4_pdcd5	0.449975	1.88562e-09	1.1423e-07	NA	NA	FALSE	NA	FALSE	NA	Cytosol	NA		FALSE
ube2m	myh4	myh4_ube2m	0.480889	9.36027e-11	8.16799e-09	NA	NA	FALSE	NA	FALSE	NA	Nucleus	NA		FALSE
hspbp1	myh4	hspbp1_myh4	0.374106	9.39162e-07	2.42349e-05	NA	NA	FALSE	NA	FALSE	NA	Cytosol	NA		FALSE
epm2a	myh4	epm2a_myh4	0.316583	4.0552e-05	0.000563594	NA	NA	FALSE	NA	FALSE	NA	Nucleoplasm;Nucleus	NA		FALSE
fn3k	myh4	fn3k_myh4	0.510529	3.9118e-12	4.91608e-10	NA	NA	FALSE	NA	FALSE	NA	Mitochondria;Cytoplasm	NA		FALSE
prmt5	myh4	myh4_prmt5	0.412354	4.97094e-08	1.95966e-06	NA	NA	FALSE	NA	FALSE	NA	Nucleus;Cytosol	NA		FALSE
armt1	myh4	armt1_myh4	0.33272	1.51879e-05	0.000250743	NA	NA	FALSE	NA	FALSE	NA	Nucleus;Nuclear bodies;Nucleoplasm;Cytosol	NA		FALSE
cuta	myh4	cuta_myh4	0.41194	5.14199e-08	2.01745e-06	NA	NA	FALSE	NA	FALSE	NA	Focal Adhesions;Plasma membrane	NA		FALSE
micos13	myh4	micos13_myh4	0.37117	1.15925e-06	2.89749e-05	NA	NA	FALSE	NA	FALSE	NA	NA	NA		FALSE
camk1	myh4	camk1_myh4	0.323807	2.63073e-05	0.000394932	NA	NA	FALSE	NA	FALSE	NA	Cytosol	NA		FALSE
dnase1l1	myh4	dnase1l1_myh4	0.441543	4.06605e-09	2.23585e-07	NA	NA	FALSE	NA	FALSE	NA	NA	NA		FALSE
nudt16	myh4	myh4_nudt16	0.336065	1.2304e-05	0.000210478	NA	NA	FALSE	NA	FALSE	NA	Nucleus;Nucleoli	NA		FALSE
myh7	myh1	myh1_myh7	0.383492	4.72403e-07	1.35161e-05	NA	NA	FALSE	NA	FALSE	912	NA	NA		FALSE
flnc	myh1	flnc_myh1	0.361366	2.30716e-06	5.18349e-05	NA	NA	FALSE	NA	FALSE	363	Cytosol;Plasma membrane	NA		FALSE
hadha	myh1	hadha_myh1	0.426151	1.56802e-08	7.23068e-07	NA	NA	FALSE	NA	FALSE	NA	Mitochondria;Cytoplasm	NA		FALSE
fh1	myh1	fh1_myh1	0.458432	8.54117e-10	5.71531e-08	NA	NA	FALSE	NA	FALSE	NA	NA	NA		FALSE
sdha	myh1	myh1_sdha	0.606889	1.12632e-17	5.08596e-15	NA	NA	FALSE	NA	FALSE	NA	Mitochondria;Cytoplasm	NA		FALSE
atp5a1	myh1	atp5a1_myh1	0.565036	4.7843e-15	1.21454e-12	NA	NA	FALSE	NA	FALSE	202	Mitochondria;Cytoplasm	NA		FALSE
immt	myh1	immt_myh1	0.384458	4.39594e-07	1.27126e-05	NA	NA	FALSE	NA	FALSE	NA	Mitochondria;Cytoplasm	NA		FALSE
acaa2	myh1	acaa2_myh1	0.39102	2.67997e-07	8.3286e-06	NA	NA	FALSE	NA	FALSE	NA	Mitochondria;Cytoplasm	NA		FALSE
hspa9	myh1	hspa9_myh1	0.601172	2.71336e-17	1.12968e-14	NA	NA	FALSE	NA	FALSE	NA	Mitochondria;Cytoplasm	NA		FALSE
hk2	myh1	hk2_myh1	0.421755	2.27749e-08	9.98664e-07	NA	NA	FALSE	NA	FALSE	NA	NA	NA		FALSE
ndufs1	myh1	myh1_ndufs1	0.359569	2.61105e-06	5.75307e-05	NA	NA	FALSE	NA	FALSE	NA	Mitochondria;Cytoplasm	NA		FALSE
acadvl	myh1	acadvl_myh1	0.559076	1.058e-14	2.48003e-12	NA	NA	FALSE	NA	FALSE	NA	Nucleus;Mitochondria;Cytoplasm	NA		FALSE
myot	myh1	myh1_myot	0.451255	1.67488e-09	1.03027e-07	NA	NA	FALSE	NA	FALSE	610	NA	NA		FALSE
ckmt2	myh1	ckmt2_myh1	0.733525	1.25451e-28	4.22102e-25	NA	NA	FALSE	NA	FALSE	312	NA	NA		FALSE
oxct1	myh1	myh1_oxct1	0.487063	4.9529e-11	4.66168e-09	NA	NA	FALSE	NA	FALSE	NA	Mitochondria;Cytoplasm	NA		FALSE
gys1	myh1	gys1_myh1	0.308488	6.50082e-05	0.000829105	NA	NA	FALSE	NA	FALSE	161	Microtubules;Cytosol	NA		FALSE
lonp1	myh1	lonp1_myh1	0.361085	2.35241e-06	5.26863e-05	NA	NA	FALSE	NA	FALSE	NA	Mitochondria;Cytoplasm	NA		FALSE
npepps	myh1	myh1_npepps	0.364234	1.89092e-06	4.38193e-05	NA	NA	FALSE	NA	FALSE	NA	Cytosol	NA		FALSE
dld	myh1	dld_myh1	0.389848	2.92995e-07	8.98576e-06	NA	NA	FALSE	NA	FALSE	NA	Mitochondria;Cytoplasm	NA		FALSE
got2	myh1	got2_myh1	0.648357	1.08651e-20	9.03533e-18	NA	NA	FALSE	NA	FALSE	161	NA	NA		FALSE
sucla2	myh1	myh1_sucla2	0.36046	2.45584e-06	5.46308e-05	NA	NA	FALSE	NA	FALSE	NA	Mitochondria;Cytoplasm	NA		FALSE
acadl	myh1	acadl_myh1	0.386216	3.85439e-07	1.13621e-05	NA	NA	FALSE	NA	FALSE	NA	NA	NA		FALSE
acadl	myh1	acadl_myh1	0.386216	3.85439e-07	1.13621e-05	NA	NA	FALSE	NA	FALSE	NA	NA	NA		FALSE
mdh2	myh1	mdh2_myh1	0.452426	1.5023e-09	9.36773e-08	NA	NA	FALSE	NA	FALSE	206	Mitochondria;Cytoplasm	NA		FALSE
tufm	myh1	myh1_tufm	0.464104	4.9605e-10	3.54869e-08	NA	NA	FALSE	NA	FALSE	NA	Mitochondria;Cytoplasm	NA		FALSE
pdhb	myh1	myh1_pdhb	0.532738	2.94046e-13	4.89617e-11	NA	NA	FALSE	NA	FALSE	NA	Mitochondria;Cytoplasm	NA		FALSE
letm1	myh1	letm1_myh1	0.354764	3.62144e-06	7.57605e-05	NA	NA	FALSE	NA	FALSE	NA	Mitochondria;Cytoplasm	NA		FALSE
ndufs2	myh1	myh1_ndufs2	0.406111	8.23918e-08	3.02845e-06	NA	NA	FALSE	NA	FALSE	NA	Mitochondria;Cytoplasm	NA		FALSE
idh3b	myh1	idh3b_myh1	0.467914	3.4239e-10	2.56149e-08	NA	NA	FALSE	NA	FALSE	NA	Mitochondria;Cytoplasm	NA		FALSE
dlat	myh1	dlat_myh1	0.454559	1.23081e-09	7.86741e-08	NA	NA	FALSE	NA	FALSE	244	Mitochondria;Cytoplasm	NA		FALSE
acat1	myh1	acat1_myh1	0.355539	3.43656e-06	7.24885e-05	NA	NA	FALSE	NA	FALSE	NA	Mitochondria;Cytoplasm	NA		FALSE
crat	myh1	crat_myh1	0.377827	7.17056e-07	1.92763e-05	NA	NA	FALSE	NA	FALSE	NA	Nucleoplasm;Nucleus;Nuclear membrane	NA		FALSE
cs	myh1	cs_myh1	0.320158	3.27798e-05	0.000473352	NA	NA	FALSE	NA	FALSE	373	Mitochondria;Cytoplasm	NA		FALSE
uqcrc1	myh1	myh1_uqcrc1	0.537223	1.70361e-13	3.00687e-11	NA	NA	FALSE	NA	FALSE	NA	Mitochondria;Cytoplasm	NA		FALSE
cryab	myh1	cryab_myh1	0.504344	7.78295e-12	9.05517e-10	NA	NA	FALSE	NA	FALSE	291	Cytosol;Plasma membrane	NA		FALSE
cox2	myh1	cox2_myh1	0.407342	7.46418e-08	2.78135e-06	NA	NA	FALSE	NA	FALSE	NA	NA	NA		FALSE
cox2	myh1	cox2_myh1	0.407342	7.46418e-08	2.78135e-06	NA	NA	FALSE	NA	FALSE	NA	NA	NA		FALSE
ndufa12	myh1	myh1_ndufa12	0.347317	5.9499e-06	0.00011483	NA	NA	FALSE	NA	FALSE	NA	Mitochondria;Cytoplasm	NA		FALSE
prdx3	myh1	myh1_prdx3	0.367097	1.54719e-06	3.6991e-05	NA	NA	FALSE	NA	FALSE	NA	NA	NA		FALSE
dnajb4	myh1	dnajb4_myh1	0.312167	5.2547e-05	0.000696792	NA	NA	FALSE	NA	FALSE	NA	Nucleoplasm;Nucleus	NA		FALSE
slmap	myh1	myh1_slmap	0.504446	7.69572e-12	8.96414e-10	NA	NA	FALSE	NA	FALSE	NA	Endoplasmic reticulum;Cytoplasm	NA		FALSE
wfs1	myh1	myh1_wfs1	0.431293	1.0064e-08	4.92361e-07	NA	NA	FALSE	NA	FALSE	NA	NA	NA		FALSE
eci2	myh1	eci2_myh1	0.376925	7.65725e-07	2.0382e-05	NA	NA	FALSE	NA	FALSE	NA	Vesicles	NA		FALSE
atp1b1	myh1	atp1b1_myh1	0.707044	7.42891e-26	1.57365e-22	NA	NA	FALSE	NA	FALSE	NA	NA	NA		FALSE
ndufa5	myh1	myh1_ndufa5	0.331536	1.63543e-05	0.000266605	NA	NA	FALSE	NA	FALSE	NA	NA	NA		FALSE
pacsin2	myh1	myh1_pacsin2	0.356991	3.114e-06	6.67251e-05	NA	NA	FALSE	NA	FALSE	NA	Nuclear speckles;Nucleoplasm;Nucleus;Vesicles;Cytosol	NA		FALSE
chchd3	myh1	chchd3_myh1	0.490123	3.59597e-11	3.51346e-09	NA	NA	FALSE	NA	FALSE	NA	Mitochondria;Cytoplasm	NA		FALSE
ndufb7	myh1	myh1_ndufb7	0.307127	7.02794e-05	0.000883526	NA	NA	FALSE	NA	FALSE	209	NA	NA		FALSE
ndufb11	myh1	myh1_ndufb11	0.457167	9.6281e-10	6.34693e-08	NA	NA	FALSE	NA	FALSE	NA	Mitochondria;Cytoplasm	NA		FALSE
cox5a	myh1	cox5a_myh1	0.327565	2.09113e-05	0.000326665	NA	NA	FALSE	NA	FALSE	NA	NA	NA		FALSE
rmdn1	myh1	myh1_rmdn1	0.489608	3.79562e-11	3.68357e-09	NA	NA	FALSE	NA	FALSE	NA	Centrosome	NA		FALSE
cisd1	myh1	cisd1_myh1	0.359214	2.67545e-06	5.87272e-05	NA	NA	FALSE	NA	FALSE	NA	Mitochondria;Cytoplasm	NA		FALSE
acss1	myh1	acss1_myh1	0.473949	1.88567e-10	1.51658e-08	NA	NA	FALSE	NA	FALSE	NA	NA	NA		FALSE
fabp3	myh1	fabp3_myh1	0.403637	1.00373e-07	3.58711e-06	NA	NA	FALSE	NA	FALSE	173	Golgi apparatus;Cytoplasm	NA		FALSE
mavs	myh1	mavs_myh1	0.344808	7.0135e-06	0.000131763	NA	NA	FALSE	NA	FALSE	NA	Mitochondria;Cytoplasm	NA		FALSE
bdh1	myh1	bdh1_myh1	0.419909	2.65968e-08	1.14236e-06	NA	NA	FALSE	NA	FALSE	NA	Mitochondria;Cytoplasm	NA		FALSE
ndufa7	myh1	myh1_ndufa7	0.4342	7.80654e-09	3.94533e-07	NA	NA	FALSE	NA	FALSE	NA	Mitochondria;Cytoplasm	NA		FALSE
ndufs8	myh1	myh1_ndufs8	0.424098	1.86777e-08	8.41436e-07	NA	NA	FALSE	NA	FALSE	NA	Mitochondria;Cytoplasm	NA		FALSE
adck1	myh1	adck1_myh1	0.443414	3.43487e-09	1.92979e-07	NA	NA	FALSE	NA	FALSE	NA	Nucleoplasm;Nucleus	NA		FALSE
ndufa8	myh1	myh1_ndufa8	0.316826	3.99725e-05	0.000556963	NA	NA	FALSE	NA	FALSE	NA	Mitochondria;Cytoplasm	NA		FALSE
agpat3	myh1	agpat3_myh1	0.310903	5.65501e-05	0.000740075	NA	NA	FALSE	NA	FALSE	198	NA	NA		FALSE
uqcrh	myh1	myh1_uqcrh	0.346777	6.16477e-06	0.000118288	NA	NA	FALSE	NA	FALSE	NA	NA	NA		FALSE
abhd11	myh1	abhd11_myh1	0.326788	2.19337e-05	0.000339834	NA	NA	FALSE	NA	FALSE	NA	Mitochondria;Cytoplasm	NA		FALSE
tcap	myh1	myh1_tcap	0.325108	2.4306e-05	0.000369893	NA	NA	FALSE	NA	FALSE	481	NA	NA		FALSE
ppif	myh1	myh1_ppif	0.499664	1.29801e-11	1.42496e-09	NA	NA	FALSE	NA	FALSE	272	Mitochondria;Cytoplasm	NA		FALSE
tnnc1	myh1	myh1_tnnc1	0.349774	5.0578e-06	0.000100233	NA	NA	FALSE	NA	FALSE	443	Nucleoplasm;Nucleus;Actin filaments;Cytoskeleton;Mitochondria;Cytoplasm	NA		FALSE
dhrs4	myh1	dhrs4_myh1	0.420851	2.45755e-08	1.06658e-06	NA	NA	FALSE	NA	FALSE	NA	Vesicles	NA		FALSE
grpel1	myh1	grpel1_myh1	0.385268	4.13796e-07	1.20721e-05	NA	NA	FALSE	NA	FALSE	NA	Mitochondria;Cytoplasm	NA		FALSE
ndufs4	myh1	myh1_ndufs4	0.37515	8.70983e-07	2.27392e-05	NA	NA	FALSE	NA	FALSE	175	Mitochondria;Cytoplasm	NA		FALSE
ndufs6	myh1	myh1_ndufs6	0.434363	7.6955e-09	3.8967e-07	NA	NA	FALSE	NA	FALSE	NA	NA	NA		FALSE
atp5k	myh1	atp5k_myh1	0.473858	1.90301e-10	1.52854e-08	NA	NA	FALSE	NA	FALSE	NA	NA	NA		FALSE
ndufs5	myh1	myh1_ndufs5	0.404107	9.66942e-08	3.47354e-06	NA	NA	FALSE	NA	FALSE	NA	Cytosol	NA		FALSE
acot13	myh1	acot13_myh1	0.381024	5.67131e-07	1.57888e-05	NA	NA	FALSE	NA	FALSE	NA	Cell Junctions	NA		FALSE
cox5b	myh1	cox5b_myh1	0.446139	2.68168e-09	1.55381e-07	NA	NA	FALSE	NA	FALSE	NA	Mitochondria;Cytoplasm	NA		FALSE
ndufs7	myh1	myh1_ndufs7	0.346704	6.19475e-06	0.000118772	NA	NA	FALSE	NA	FALSE	NA	NA	NA		FALSE
mpc1	myh1	mpc1_myh1	0.33971	9.75368e-06	0.000173524	NA	NA	FALSE	NA	FALSE	NA	Mitochondria;Cytoplasm	NA		FALSE
gstk1	myh1	gstk1_myh1	0.497722	1.60118e-11	1.71571e-09	NA	NA	FALSE	NA	FALSE	NA	Vesicles	NA		FALSE
atp5j	myh1	atp5j_myh1	0.399134	1.43179e-07	4.86613e-06	NA	NA	FALSE	NA	FALSE	NA	Mitochondria;Cytoplasm	NA		FALSE
ndufa6	myh1	myh1_ndufa6	0.482967	7.5658e-11	6.77236e-09	NA	NA	FALSE	NA	FALSE	NA	NA	NA		FALSE
tnni1	myh1	myh1_tnni1	0.338579	1.04859e-05	0.000184261	NA	NA	FALSE	NA	FALSE	656	Nucleus	NA		FALSE
mrps9	myh1	mrps9_myh1	0.322851	2.78747e-05	0.00041418	NA	NA	FALSE	NA	FALSE	NA	Mitochondria;Cytoplasm	NA		FALSE
tfam	myh1	myh1_tfam	0.350789	4.7276e-06	9.4733e-05	NA	NA	FALSE	NA	FALSE	198	Mitochondria;Cytoplasm	NA		FALSE
ndufc2	myh1	myh1_ndufc2	0.447819	2.2996e-09	1.35841e-07	NA	NA	FALSE	NA	FALSE	NA	Mitochondria;Cytoplasm	NA		FALSE
ndufab1	myh1	myh1_ndufab1	0.388572	3.2275e-07	9.76092e-06	NA	NA	FALSE	NA	FALSE	NA	Mitochondria;Cytoplasm	NA		FALSE
csrp3	myh1	csrp3_myh1	0.520934	1.19112e-12	1.70594e-10	NA	NA	FALSE	NA	FALSE	341	NA	NA		FALSE
ndufb4	myh1	myh1_ndufb4	0.401476	1.19103e-07	4.15505e-06	NA	NA	FALSE	NA	FALSE	NA	Mitochondria;Cytoplasm	NA		FALSE
ndufb4b	myh1	myh1_ndufb4b	0.401476	1.19103e-07	4.15505e-06	NA	NA	FALSE	NA	FALSE	NA	NA	NA		FALSE
mcee	myh1	mcee_myh1	0.422868	2.07315e-08	9.20742e-07	NA	NA	FALSE	NA	FALSE	NA	Nucleoli;Nucleus	NA		FALSE
ndufa3	myh1	myh1_ndufa3	0.389843	2.93118e-07	8.98882e-06	NA	NA	FALSE	NA	FALSE	NA	NA	NA		FALSE
micos13	myh1	micos13_myh1	0.399654	1.37464e-07	4.69743e-06	NA	NA	FALSE	NA	FALSE	NA	NA	NA		FALSE
uqcrq	myh1	myh1_uqcrq	0.534523	2.36866e-13	4.03646e-11	NA	NA	FALSE	NA	FALSE	NA	Mitochondria;Cytoplasm	NA		FALSE
dnajc19	myh1	dnajc19_myh1	0.316122	4.16718e-05	0.000576392	NA	NA	FALSE	NA	FALSE	NA	NA	NA		FALSE
mtx2	myh1	mtx2_myh1	0.558334	1.16661e-14	2.70757e-12	NA	NA	FALSE	NA	FALSE	NA	Mitochondria;Cytoplasm	NA		FALSE
mrps27	myh1	mrps27_myh1	0.313369	4.8988e-05	0.000658068	NA	NA	FALSE	NA	FALSE	NA	NA	NA		FALSE
slc16a1	myh1	myh1_slc16a1	0.505428	6.90558e-12	8.14821e-10	NA	NA	FALSE	NA	FALSE	NA	Cell Junctions;Plasma membrane	NA		FALSE
tefm	myh1	myh1_tefm	0.364242	1.88981e-06	4.37981e-05	NA	NA	FALSE	NA	FALSE	NA	Mitochondria;Cytoplasm	NA		FALSE
dhrs11	myh1	dhrs11_myh1	0.370311	1.23239e-06	3.05115e-05	NA	NA	FALSE	NA	FALSE	NA	Cytosol	NA		FALSE
hint2	myh1	hint2_myh1	0.400337	1.30284e-07	4.48713e-06	NA	NA	FALSE	NA	FALSE	NA	Mitochondria;Cytoplasm	NA		FALSE
uqcrb	myh1	myh1_uqcrb	0.539203	1.33538e-13	2.41813e-11	NA	NA	FALSE	NA	FALSE	NA	NA	NA		FALSE
ddt	myh1	ddt_myh1	0.404527	9.35121e-08	3.3754e-06	NA	NA	FALSE	NA	FALSE	NA	Mitochondria;Cytoplasm	NA		FALSE
ndufa11	myh1	myh1_ndufa11	0.329039	1.9095e-05	0.000302959	NA	NA	FALSE	NA	FALSE	NA	Mitochondria;Cytoplasm	NA		FALSE
nceh1	myh1	myh1_nceh1	0.382141	5.22217e-07	1.47153e-05	NA	NA	FALSE	NA	FALSE	NA	Endoplasmic reticulum;Cytoplasm	NA		FALSE
hspe1	myh1	hspe1_myh1	0.337385	1.13152e-05	0.000196323	NA	NA	FALSE	NA	FALSE	NA	NA	NA		FALSE
atp5l	myh1	atp5l_myh1	0.431508	9.87755e-09	4.84449e-07	NA	NA	FALSE	NA	FALSE	NA	Mitochondria;Cytoplasm	NA		FALSE
atp5d	myh1	atp5d_myh1	0.514047	2.62857e-12	3.44992e-10	NA	NA	FALSE	NA	FALSE	NA	NA	NA		FALSE
cox6b1	myh1	cox6b1_myh1	0.374583	9.07409e-07	2.35426e-05	NA	NA	FALSE	NA	FALSE	NA	Mitochondria;Cytoplasm	NA		FALSE
hccs	myh1	hccs_myh1	0.38525	4.14344e-07	1.20858e-05	NA	NA	FALSE	NA	FALSE	NA	Mitochondria;Cytoplasm	NA		FALSE
ndufb5	myh1	myh1_ndufb5	0.404414	9.43571e-08	3.40148e-06	NA	NA	FALSE	NA	FALSE	NA	Mitochondria;Cytoplasm	NA		FALSE
ndufa4	myh1	myh1_ndufa4	0.50361	8.43694e-12	9.72797e-10	NA	NA	FALSE	NA	FALSE	NA	Mitochondria;Cytoplasm	NA		FALSE
bckdk	myh1	bckdk_myh1	0.325708	2.34317e-05	0.000358914	NA	NA	FALSE	NA	FALSE	NA	Mitochondria;Cytoplasm	NA		FALSE
podxl	myh1	myh1_podxl	0.405268	8.81415e-08	3.20879e-06	NA	NA	FALSE	NA	FALSE	NA	Microtubule organizing center;Cytoskeleton;Plasma membrane	NA		FALSE
ccdc58	myh1	ccdc58_myh1	0.340211	9.4448e-06	0.000168937	NA	NA	FALSE	NA	FALSE	NA	Nucleoli;Nucleus;Mitochondria;Cytoplasm	NA		FALSE
timm9	myh1	myh1_timm9	0.310903	5.65493e-05	0.000740069	NA	NA	FALSE	NA	FALSE	NA	Mitochondria;Cytoplasm	NA		FALSE
cox1	myh1	cox1_myh1	0.356923	3.12847e-06	6.69914e-05	NA	NA	FALSE	NA	FALSE	NA	NA	NA		FALSE
cox1	myh1	cox1_myh1	0.356923	3.12847e-06	6.69914e-05	NA	NA	FALSE	NA	FALSE	NA	NA	NA		FALSE
myh1	myh2	myh1_myh2	0.828777	3.44641e-42	7.98808e-38	NA	NA	FALSE	NA	FALSE	958	NA	NA		FALSE
myh7	myh2	myh2_myh7	0.415863	3.72511e-08	1.52836e-06	NA	NA	FALSE	NA	FALSE	917	NA	NA		FALSE
flnc	myh2	flnc_myh2	0.384626	4.34131e-07	1.25764e-05	NA	NA	FALSE	NA	FALSE	360	Cytosol;Plasma membrane	NA		FALSE
hspd1	myh2	hspd1_myh2	0.412848	4.77401e-08	1.89254e-06	NA	NA	FALSE	NA	FALSE	NA	Mitochondria;Cytoplasm	NA		FALSE
hadha	myh2	hadha_myh2	0.53915	1.34414e-13	2.43252e-11	NA	NA	FALSE	NA	FALSE	NA	Mitochondria;Cytoplasm	NA		FALSE
fh1	myh2	fh1_myh2	0.47157	2.38904e-10	1.86742e-08	NA	NA	FALSE	NA	FALSE	NA	NA	NA		FALSE
sdha	myh2	myh2_sdha	0.575764	1.10046e-15	3.22333e-13	NA	NA	FALSE	NA	FALSE	155	Mitochondria;Cytoplasm	NA		FALSE
atp5a1	myh2	atp5a1_myh2	0.542841	8.49995e-14	1.61415e-11	NA	NA	FALSE	NA	FALSE	NA	Mitochondria;Cytoplasm	NA		FALSE
immt	myh2	immt_myh2	0.415096	3.96859e-08	1.6143e-06	NA	NA	FALSE	NA	FALSE	NA	Mitochondria;Cytoplasm	NA		FALSE
acaa2	myh2	acaa2_myh2	0.431239	1.01115e-08	4.94345e-07	NA	NA	FALSE	NA	FALSE	NA	Mitochondria;Cytoplasm	NA		FALSE
hspa9	myh2	hspa9_myh2	0.617004	2.2755e-18	1.18918e-15	NA	NA	FALSE	NA	FALSE	NA	Mitochondria;Cytoplasm	NA		FALSE
hk2	myh2	hk2_myh2	0.42509	1.71659e-08	7.81979e-07	NA	NA	FALSE	NA	FALSE	150	NA	NA		FALSE
ndufs1	myh2	myh2_ndufs1	0.412277	5.00243e-08	1.97025e-06	NA	NA	FALSE	NA	FALSE	NA	Mitochondria;Cytoplasm	NA		FALSE
acadvl	myh2	acadvl_myh2	0.617966	1.94866e-18	1.03275e-15	NA	NA	FALSE	NA	FALSE	NA	Nucleus;Mitochondria;Cytoplasm	NA		FALSE
dnm1l	myh2	dnm1l_myh2	0.30843	6.52258e-05	0.000831381	NA	NA	FALSE	NA	FALSE	NA	Cytosol	NA		FALSE
myot	myh2	myh2_myot	0.440534	4.45156e-09	2.42014e-07	NA	NA	FALSE	NA	FALSE	517	NA	NA		FALSE
ckmt2	myh2	ckmt2_myh2	0.636704	8.50959e-20	5.93804e-17	NA	NA	FALSE	NA	FALSE	357	NA	NA		FALSE
oxct1	myh2	myh2_oxct1	0.583263	3.81496e-16	1.2375e-13	NA	NA	FALSE	NA	FALSE	NA	Mitochondria;Cytoplasm	NA		FALSE
gys1	myh2	gys1_myh2	0.310311	5.85225e-05	0.00076107	NA	NA	FALSE	NA	FALSE	186	Microtubules;Cytosol	NA		FALSE
lonp1	myh2	lonp1_myh2	0.346413	6.31389e-06	0.000120693	NA	NA	FALSE	NA	FALSE	NA	Mitochondria;Cytoplasm	NA		FALSE
npepps	myh2	myh2_npepps	0.477391	1.3349e-10	1.11793e-08	NA	NA	FALSE	NA	FALSE	NA	Cytosol	NA		FALSE
car3	myh2	car3_myh2	0.361082	2.35282e-06	5.26932e-05	NA	NA	FALSE	NA	FALSE	NA	NA	NA		FALSE
vdac1	myh2	myh2_vdac1	0.355744	3.38899e-06	7.1648e-05	NA	NA	FALSE	NA	FALSE	NA	Cytosol	NA		FALSE
dld	myh2	dld_myh2	0.410825	5.63125e-08	2.18182e-06	NA	NA	FALSE	NA	FALSE	NA	Mitochondria;Cytoplasm	NA		FALSE
got2	myh2	got2_myh2	0.639819	4.95111e-20	3.62343e-17	NA	NA	FALSE	NA	FALSE	NA	NA	NA		FALSE
sucla2	myh2	myh2_sucla2	0.408004	7.07682e-08	2.65631e-06	NA	NA	FALSE	NA	FALSE	NA	Mitochondria;Cytoplasm	NA		FALSE
acadl	myh2	acadl_myh2	0.419512	2.74958e-08	1.17555e-06	NA	NA	FALSE	NA	FALSE	185	NA	NA		FALSE
acadl	myh2	acadl_myh2	0.419512	2.74958e-08	1.17555e-06	NA	NA	FALSE	NA	FALSE	185	NA	NA		FALSE
aldh6a1	myh2	aldh6a1_myh2	0.319848	3.3394e-05	0.000480621	NA	NA	FALSE	NA	FALSE	NA	Mitochondria;Cytoplasm	NA		FALSE
mdh2	myh2	mdh2_myh2	0.469449	2.94525e-10	2.24503e-08	NA	NA	FALSE	NA	FALSE	NA	Mitochondria;Cytoplasm	NA		FALSE
tufm	myh2	myh2_tufm	0.483322	7.29432e-11	6.55639e-09	NA	NA	FALSE	NA	FALSE	NA	Mitochondria;Cytoplasm	NA		FALSE
hadhb	myh2	hadhb_myh2	0.362061	2.19893e-06	4.97727e-05	NA	NA	FALSE	NA	FALSE	NA	Mitochondria;Cytoplasm	NA		FALSE
pdhb	myh2	myh2_pdhb	0.55728	1.33971e-14	3.06685e-12	NA	NA	FALSE	NA	FALSE	NA	Mitochondria;Cytoplasm	NA		FALSE
letm1	myh2	letm1_myh2	0.398424	1.51352e-07	5.10472e-06	NA	NA	FALSE	NA	FALSE	NA	Mitochondria;Cytoplasm	NA		FALSE
ndufs2	myh2	myh2_ndufs2	0.458945	8.13448e-10	5.47694e-08	NA	NA	FALSE	NA	FALSE	NA	Mitochondria;Cytoplasm	NA		FALSE
idh3b	myh2	idh3b_myh2	0.449964	1.88757e-09	1.1433e-07	NA	NA	FALSE	NA	FALSE	NA	Mitochondria;Cytoplasm	NA		FALSE
dlat	myh2	dlat_myh2	0.472543	2.16913e-10	1.71525e-08	NA	NA	FALSE	NA	FALSE	260	Mitochondria;Cytoplasm	NA		FALSE
acat1	myh2	acat1_myh2	0.455977	1.07726e-09	7.00236e-08	NA	NA	FALSE	NA	FALSE	NA	Mitochondria;Cytoplasm	NA		FALSE
crat	myh2	crat_myh2	0.392926	2.31655e-07	7.35339e-06	NA	NA	FALSE	NA	FALSE	NA	Nucleoplasm;Nucleus;Nuclear membrane	NA		FALSE
cs	myh2	cs_myh2	0.313324	4.91175e-05	0.000659513	NA	NA	FALSE	NA	FALSE	415	Mitochondria;Cytoplasm	NA		FALSE
uqcrc1	myh2	myh2_uqcrc1	0.54772	4.59784e-14	9.286e-12	NA	NA	FALSE	NA	FALSE	NA	Mitochondria;Cytoplasm	NA		FALSE
etfdh	myh2	etfdh_myh2	0.562833	6.42693e-15	1.58475e-12	NA	NA	FALSE	NA	FALSE	NA	NA	NA		FALSE
ndufa9	myh2	myh2_ndufa9	0.347372	5.92826e-06	0.000114485	NA	NA	FALSE	NA	FALSE	NA	Nucleoplasm;Nucleus;Mitochondria;Cytoplasm	NA		FALSE
idh3g	myh2	idh3g_myh2	0.365923	1.68023e-06	3.96657e-05	NA	NA	FALSE	NA	FALSE	NA	Mitochondria;Cytoplasm	NA		FALSE
uqcrc2	myh2	myh2_uqcrc2	0.458233	8.70336e-10	5.81003e-08	NA	NA	FALSE	NA	FALSE	NA	Mitochondria;Cytoplasm	NA		FALSE
aifm1	myh2	aifm1_myh2	0.479965	1.0284e-10	8.87727e-09	NA	NA	FALSE	NA	FALSE	NA	NA	NA		FALSE
coq8a	myh2	coq8a_myh2	0.582082	4.51601e-16	1.44146e-13	NA	NA	FALSE	NA	FALSE	NA	NA	NA		FALSE
myl3	myh2	myh2_myl3	0.482148	8.22909e-11	7.29318e-09	NA	NA	FALSE	NA	FALSE	947	Vesicles	NA		FALSE
iars2	myh2	iars2_myh2	0.317625	3.81233e-05	0.000535812	NA	NA	FALSE	NA	FALSE	NA	Mitochondria;Cytoplasm	NA		FALSE
cpt1b	myh2	cpt1b_myh2	0.427757	1.36624e-08	6.41879e-07	NA	NA	FALSE	NA	FALSE	339	NA	NA		FALSE
idh2	myh2	idh2_myh2	0.73583	6.94076e-29	2.43282e-25	NA	NA	FALSE	NA	FALSE	NA	Mitochondria;Cytoplasm	NA		FALSE
got1	myh2	got1_myh2	0.407072	7.62807e-08	2.83386e-06	NA	NA	FALSE	NA	FALSE	NA	Nucleoplasm;Nucleus	NA		FALSE
mb	myh2	mb_myh2	0.737229	4.83168e-29	1.72837e-25	NA	NA	FALSE	NA	FALSE	520	NA	NA		FALSE
etfa	myh2	etfa_myh2	0.590205	1.39615e-16	4.98865e-14	NA	NA	FALSE	NA	FALSE	NA	Mitochondria;Cytoplasm	NA		FALSE
cryab	myh2	cryab_myh2	0.501042	1.11742e-11	1.24812e-09	NA	NA	FALSE	NA	FALSE	262	Cytosol;Plasma membrane	NA		FALSE
cox2	myh2	cox2_myh2	0.39187	2.5116e-07	7.87997e-06	NA	NA	FALSE	NA	FALSE	NA	NA	NA		FALSE
cox2	myh2	cox2_myh2	0.39187	2.5116e-07	7.87997e-06	NA	NA	FALSE	NA	FALSE	NA	NA	NA		FALSE
ndufa12	myh2	myh2_ndufa12	0.423207	2.01446e-08	8.98412e-07	NA	NA	FALSE	NA	FALSE	NA	Mitochondria;Cytoplasm	NA		FALSE
prdx3	myh2	myh2_prdx3	0.351273	4.57774e-06	9.22259e-05	NA	NA	FALSE	NA	FALSE	NA	NA	NA		FALSE
slmap	myh2	myh2_slmap	0.517958	1.6805e-12	2.31742e-10	NA	NA	FALSE	NA	FALSE	NA	Endoplasmic reticulum;Cytoplasm	NA		FALSE
wfs1	myh2	myh2_wfs1	0.515564	2.21145e-12	2.95818e-10	NA	NA	FALSE	NA	FALSE	NA	NA	NA		FALSE
prdx2	myh2	myh2_prdx2	0.308288	6.576e-05	0.000836923	NA	NA	FALSE	NA	FALSE	NA	NA	NA		FALSE
eci2	myh2	eci2_myh2	0.452483	1.49428e-09	9.32432e-08	NA	NA	FALSE	NA	FALSE	NA	Vesicles	NA		FALSE
atp1b1	myh2	atp1b1_myh2	0.736191	6.32321e-29	2.22761e-25	NA	NA	FALSE	NA	FALSE	NA	NA	NA		FALSE
ndufa5	myh2	myh2_ndufa5	0.373926	9.51383e-07	2.45019e-05	NA	NA	FALSE	NA	FALSE	NA	NA	NA		FALSE
c1qbp	myh2	c1qbp_myh2	0.351719	4.4434e-06	8.99382e-05	NA	NA	FALSE	NA	FALSE	NA	Plasma membrane	NA		FALSE
chchd3	myh2	chchd3_myh2	0.57122	2.06426e-15	5.69014e-13	NA	NA	FALSE	NA	FALSE	NA	Mitochondria;Cytoplasm	NA		FALSE
pura	myh2	myh2_pura	0.357886	2.92969e-06	6.3385e-05	NA	NA	FALSE	NA	FALSE	NA	NA	NA		FALSE
ndufb7	myh2	myh2_ndufb7	0.39422	2.09717e-07	6.7546e-06	NA	NA	FALSE	NA	FALSE	NA	NA	NA		FALSE
ndufb11	myh2	myh2_ndufb11	0.512863	3.00639e-12	3.88874e-10	NA	NA	FALSE	NA	FALSE	NA	Mitochondria;Cytoplasm	NA		FALSE
cox5a	myh2	cox5a_myh2	0.34019	9.45752e-06	0.000169122	NA	NA	FALSE	NA	FALSE	NA	NA	NA		FALSE
rmdn1	myh2	myh2_rmdn1	0.570537	2.26709e-15	6.19058e-13	NA	NA	FALSE	NA	FALSE	NA	Centrosome	NA		FALSE
cisd1	myh2	cisd1_myh2	0.446672	2.55436e-09	1.4891e-07	NA	NA	FALSE	NA	FALSE	NA	Mitochondria;Cytoplasm	NA		FALSE
acss1	myh2	acss1_myh2	0.533635	2.63823e-13	4.44292e-11	NA	NA	FALSE	NA	FALSE	NA	NA	NA		FALSE
fabp3	myh2	fabp3_myh2	0.58921	1.61471e-16	5.69226e-14	NA	NA	FALSE	NA	FALSE	269	Golgi apparatus;Cytoplasm	NA		FALSE
slc25a20	myh2	myh2_slc25a20	0.328869	1.92965e-05	0.000305605	NA	NA	FALSE	NA	FALSE	NA	Cytosol;Mitochondria;Cytoplasm	NA		FALSE
coq7	myh2	coq7_myh2	0.306759	7.17743e-05	0.000898854	NA	NA	FALSE	NA	FALSE	NA	Plasma membrane	NA		FALSE
coq3	myh2	coq3_myh2	0.406002	8.31156e-08	3.05135e-06	NA	NA	FALSE	NA	FALSE	NA	Nucleoplasm;Nucleus;Mitochondria;Cytoplasm	NA		FALSE
mavs	myh2	mavs_myh2	0.31687	3.9868e-05	0.000555788	NA	NA	FALSE	NA	FALSE	NA	Mitochondria;Cytoplasm	NA		FALSE
bdh1	myh2	bdh1_myh2	0.501741	1.03533e-11	1.16675e-09	NA	NA	FALSE	NA	FALSE	NA	Mitochondria;Cytoplasm	NA		FALSE
ndufa7	myh2	myh2_ndufa7	0.472416	2.19675e-10	1.73471e-08	NA	NA	FALSE	NA	FALSE	NA	Mitochondria;Cytoplasm	NA		FALSE
ndufs8	myh2	myh2_ndufs8	0.501816	1.02697e-11	1.15839e-09	NA	NA	FALSE	NA	FALSE	NA	Mitochondria;Cytoplasm	NA		FALSE
sgcd	myh2	myh2_sgcd	0.329251	1.88468e-05	0.000299734	NA	NA	FALSE	NA	FALSE	NA	NA	NA		FALSE
adck1	myh2	adck1_myh2	0.427912	1.34821e-08	6.34589e-07	NA	NA	FALSE	NA	FALSE	NA	Nucleoplasm;Nucleus	NA		FALSE
ndufa8	myh2	myh2_ndufa8	0.362429	2.14368e-06	4.8717e-05	NA	NA	FALSE	NA	FALSE	NA	Mitochondria;Cytoplasm	NA		FALSE
agpat3	myh2	agpat3_myh2	0.368644	1.38715e-06	3.37236e-05	NA	NA	FALSE	NA	FALSE	NA	NA	NA		FALSE
uqcrh	myh2	myh2_uqcrh	0.381096	5.64142e-07	1.57166e-05	NA	NA	FALSE	NA	FALSE	NA	NA	NA		FALSE
abhd11	myh2	abhd11_myh2	0.466265	4.02195e-10	2.95119e-08	NA	NA	FALSE	NA	FALSE	NA	Mitochondria;Cytoplasm	NA		FALSE
tcap	myh2	myh2_tcap	0.374754	8.96249e-07	2.32972e-05	NA	NA	FALSE	NA	FALSE	362	NA	NA		FALSE
ppif	myh2	myh2_ppif	0.43515	7.18124e-09	3.6692e-07	NA	NA	FALSE	NA	FALSE	163	Mitochondria;Cytoplasm	NA		FALSE
tnnc1	myh2	myh2_tnnc1	0.414118	4.30142e-08	1.72998e-06	NA	NA	FALSE	NA	FALSE	476	Nucleoplasm;Nucleus;Actin filaments;Cytoskeleton;Mitochondria;Cytoplasm	NA		FALSE
dhrs4	myh2	dhrs4_myh2	0.502515	9.51393e-12	1.08267e-09	NA	NA	FALSE	NA	FALSE	NA	Vesicles	NA		FALSE
grpel1	myh2	grpel1_myh2	0.348678	5.43894e-06	0.000106497	NA	NA	FALSE	NA	FALSE	NA	Mitochondria;Cytoplasm	NA		FALSE
ndufs4	myh2	myh2_ndufs4	0.459674	7.58947e-10	5.15337e-08	NA	NA	FALSE	NA	FALSE	NA	Mitochondria;Cytoplasm	NA		FALSE
ndufs6	myh2	myh2_ndufs6	0.486594	5.20063e-11	4.86565e-09	NA	NA	FALSE	NA	FALSE	NA	NA	NA		FALSE
atp5k	myh2	atp5k_myh2	0.494875	2.1732e-11	2.24882e-09	NA	NA	FALSE	NA	FALSE	NA	NA	NA		FALSE
ndufs5	myh2	myh2_ndufs5	0.403208	1.0385e-07	3.69437e-06	NA	NA	FALSE	NA	FALSE	NA	Cytosol	NA		FALSE
acot13	myh2	acot13_myh2	0.402946	1.06033e-07	3.76055e-06	NA	NA	FALSE	NA	FALSE	NA	Cell Junctions	NA		FALSE
cox5b	myh2	cox5b_myh2	0.440435	4.49124e-09	2.43864e-07	NA	NA	FALSE	NA	FALSE	NA	Mitochondria;Cytoplasm	NA		FALSE
ndufs7	myh2	myh2_ndufs7	0.354681	3.64166e-06	7.61168e-05	NA	NA	FALSE	NA	FALSE	NA	NA	NA		FALSE
mpc1	myh2	mpc1_myh2	0.329934	1.80666e-05	0.000289469	NA	NA	FALSE	NA	FALSE	NA	Mitochondria;Cytoplasm	NA		FALSE
sdr39u1	myh2	myh2_sdr39u1	0.323849	2.62391e-05	0.000394076	NA	NA	FALSE	NA	FALSE	NA	Nucleoplasm;Nucleus;Cytosol	NA		FALSE
gstk1	myh2	gstk1_myh2	0.525162	7.262e-13	1.09648e-10	NA	NA	FALSE	NA	FALSE	NA	Vesicles	NA		FALSE
atp5j	myh2	atp5j_myh2	0.353038	4.06764e-06	8.35097e-05	NA	NA	FALSE	NA	FALSE	NA	Mitochondria;Cytoplasm	NA		FALSE
ndufa6	myh2	myh2_ndufa6	0.520519	1.24988e-12	1.78066e-10	NA	NA	FALSE	NA	FALSE	NA	NA	NA		FALSE
tnni1	myh2	myh2_tnni1	0.346557	6.25452e-06	0.000119729	NA	NA	FALSE	NA	FALSE	623	Nucleus	NA		FALSE
tfam	myh2	myh2_tfam	0.444519	3.10761e-09	1.76826e-07	NA	NA	FALSE	NA	FALSE	305	Mitochondria;Cytoplasm	NA		FALSE
ndufc2	myh2	myh2_ndufc2	0.502977	9.04454e-12	1.03493e-09	NA	NA	FALSE	NA	FALSE	NA	Mitochondria;Cytoplasm	NA		FALSE
ndufab1	myh2	myh2_ndufab1	0.433071	8.61832e-09	4.30065e-07	NA	NA	FALSE	NA	FALSE	NA	Mitochondria;Cytoplasm	NA		FALSE
fam162a	myh2	fam162a_myh2	0.353777	3.87042e-06	8.00957e-05	NA	NA	FALSE	NA	FALSE	NA	Cytosol;Mitochondria;Cytoplasm	NA		FALSE
csrp3	myh2	csrp3_myh2	0.525468	7.0046e-13	1.06222e-10	NA	NA	FALSE	NA	FALSE	376	NA	NA		FALSE
ndufb4	myh2	myh2_ndufb4	0.468512	3.22907e-10	2.43325e-08	NA	NA	FALSE	NA	FALSE	NA	Mitochondria;Cytoplasm	NA		FALSE
ndufb4b	myh2	myh2_ndufb4b	0.468512	3.22907e-10	2.43325e-08	NA	NA	FALSE	NA	FALSE	NA	NA	NA		FALSE
mcee	myh2	mcee_myh2	0.375154	8.70705e-07	2.27329e-05	NA	NA	FALSE	NA	FALSE	NA	Nucleoli;Nucleus	NA		FALSE
ndufa3	myh2	myh2_ndufa3	0.424999	1.73003e-08	7.87273e-07	NA	NA	FALSE	NA	FALSE	NA	NA	NA		FALSE
micos13	myh2	micos13_myh2	0.483411	7.22847e-11	6.50575e-09	NA	NA	FALSE	NA	FALSE	NA	NA	NA		FALSE
uqcrq	myh2	myh2_uqcrq	0.55738	1.32234e-14	3.03152e-12	NA	NA	FALSE	NA	FALSE	NA	Mitochondria;Cytoplasm	NA		FALSE
dnajc19	myh2	dnajc19_myh2	0.363819	1.9464e-06	4.49121e-05	NA	NA	FALSE	NA	FALSE	NA	NA	NA		FALSE
mtx2	myh2	mtx2_myh2	0.569868	2.48447e-15	6.72186e-13	NA	NA	FALSE	NA	FALSE	NA	Mitochondria;Cytoplasm	NA		FALSE
nd5	myh2	myh2_nd5	0.373052	1.01315e-06	2.58464e-05	NA	NA	FALSE	NA	FALSE	NA	NA	NA		FALSE
nd5	myh2	myh2_nd5	0.373052	1.01315e-06	2.58464e-05	NA	NA	FALSE	NA	FALSE	NA	NA	NA		FALSE
mrps27	myh2	mrps27_myh2	0.363058	2.05212e-06	4.696e-05	NA	NA	FALSE	NA	FALSE	NA	NA	NA		FALSE
atpaf1	myh2	atpaf1_myh2	0.311956	5.31965e-05	0.000703855	NA	NA	FALSE	NA	FALSE	NA	Mitochondria;Cytoplasm	NA		FALSE
slc16a1	myh2	myh2_slc16a1	0.512164	3.25368e-12	4.17309e-10	NA	NA	FALSE	NA	FALSE	NA	Cell Junctions;Plasma membrane	NA		FALSE
tefm	myh2	myh2_tefm	0.318075	3.71185e-05	0.000524322	NA	NA	FALSE	NA	FALSE	NA	Mitochondria;Cytoplasm	NA		FALSE
dhrs11	myh2	dhrs11_myh2	0.347057	6.05247e-06	0.000116471	NA	NA	FALSE	NA	FALSE	NA	Cytosol	NA		FALSE
hint2	myh2	hint2_myh2	0.447785	2.30682e-09	1.36213e-07	NA	NA	FALSE	NA	FALSE	NA	Mitochondria;Cytoplasm	NA		FALSE
uqcrb	myh2	myh2_uqcrb	0.575723	1.10691e-15	3.24039e-13	NA	NA	FALSE	NA	FALSE	NA	NA	NA		FALSE
ddt	myh2	ddt_myh2	0.497408	1.65628e-11	1.76786e-09	NA	NA	FALSE	NA	FALSE	NA	Mitochondria;Cytoplasm	NA		FALSE
ndufa11	myh2	myh2_ndufa11	0.352697	4.16165e-06	8.51305e-05	NA	NA	FALSE	NA	FALSE	NA	Mitochondria;Cytoplasm	NA		FALSE
nceh1	myh2	myh2_nceh1	0.432718	8.88801e-09	4.41752e-07	NA	NA	FALSE	NA	FALSE	NA	Endoplasmic reticulum;Cytoplasm	NA		FALSE
pam16	myh2	myh2_pam16	0.302119	9.33406e-05	0.00111355	NA	NA	FALSE	NA	FALSE	NA	Nucleoplasm;Nucleus;Mitochondria;Cytoplasm	NA		FALSE
hspe1	myh2	hspe1_myh2	0.422305	2.17428e-08	9.59262e-07	NA	NA	FALSE	NA	FALSE	NA	NA	NA		FALSE
fundc2	myh2	fundc2_myh2	0.315536	4.31372e-05	0.00059296	NA	NA	FALSE	NA	FALSE	NA	NA	NA		FALSE
atp5l	myh2	atp5l_myh2	0.434873	7.35822e-09	3.74762e-07	NA	NA	FALSE	NA	FALSE	NA	Mitochondria;Cytoplasm	NA		FALSE
atp5d	myh2	atp5d_myh2	0.515366	2.26187e-12	3.01762e-10	NA	NA	FALSE	NA	FALSE	NA	NA	NA		FALSE
cox6b1	myh2	cox6b1_myh2	0.358614	2.78753e-06	6.07778e-05	NA	NA	FALSE	NA	FALSE	NA	Mitochondria;Cytoplasm	NA		FALSE
hccs	myh2	hccs_myh2	0.431841	9.59485e-09	4.72363e-07	NA	NA	FALSE	NA	FALSE	NA	Mitochondria;Cytoplasm	NA		FALSE
ndufb5	myh2	myh2_ndufb5	0.460621	6.93306e-10	4.76095e-08	NA	NA	FALSE	NA	FALSE	150	Mitochondria;Cytoplasm	NA		FALSE
h1f0	myh2	h1f0_myh2	0.344375	7.21407e-06	0.000134898	NA	NA	FALSE	NA	FALSE	NA	Nucleus;Nuclear bodies;Nucleoplasm	NA		FALSE
ndufa4	myh2	myh2_ndufa4	0.53601	1.97629e-13	3.43177e-11	NA	NA	FALSE	NA	FALSE	NA	Mitochondria;Cytoplasm	NA		FALSE
bckdk	myh2	bckdk_myh2	0.315171	4.40738e-05	0.000603579	NA	NA	FALSE	NA	FALSE	NA	Mitochondria;Cytoplasm	NA		FALSE
mrpl12	myh2	mrpl12_myh2	0.33062	1.73135e-05	0.000279465	NA	NA	FALSE	NA	FALSE	NA	Mitochondria;Cytoplasm	NA		FALSE
podxl	myh2	myh2_podxl	0.383591	4.68936e-07	1.34327e-05	NA	NA	FALSE	NA	FALSE	NA	Microtubule organizing center;Cytoskeleton;Plasma membrane	NA		FALSE
cisd2	myh2	cisd2_myh2	0.337334	1.13516e-05	0.000196848	NA	NA	FALSE	NA	FALSE	NA	Endoplasmic reticulum;Cytoplasm	NA		FALSE
gdpd1	myh2	gdpd1_myh2	0.362187	2.17995e-06	4.94119e-05	NA	NA	FALSE	NA	FALSE	NA	NA	NA		FALSE
ccdc58	myh2	ccdc58_myh2	0.404205	9.59383e-08	3.4503e-06	NA	NA	FALSE	NA	FALSE	NA	Nucleoli;Nucleus;Mitochondria;Cytoplasm	NA		FALSE
timm9	myh2	myh2_timm9	0.309924	5.98449e-05	0.000775001	NA	NA	FALSE	NA	FALSE	NA	Mitochondria;Cytoplasm	NA		FALSE
cox1	myh2	cox1_myh2	0.362124	2.18944e-06	4.95946e-05	NA	NA	FALSE	NA	FALSE	NA	NA	NA		FALSE
cox1	myh2	cox1_myh2	0.362124	2.18944e-06	4.95946e-05	NA	NA	FALSE	NA	FALSE	NA	NA	NA		FALSE
s100a1	myh2	myh2_s100a1	0.306892	7.12304e-05	0.000893278	NA	NA	FALSE	NA	FALSE	NA	NA	NA		FALSE
tmem65	myh2	myh2_tmem65	0.329784	1.82354e-05	0.000291684	NA	NA	FALSE	NA	FALSE	NA	Nucleoplasm;Nucleus	NA		FALSE
cox7c	myh2	cox7c_myh2	0.372106	1.08423e-06	2.73716e-05	NA	NA	FALSE	NA	FALSE	NA	NA	NA		FALSE
fam210a	myh2	fam210a_myh2	0.572543	1.72042e-15	4.8277e-13	NA	NA	FALSE	NA	FALSE	NA	Nucleus;Golgi apparatus;Cytoplasm;Mitochondria	NA		FALSE
oxnad1	myh2	myh2_oxnad1	0.38629	3.83305e-07	1.13084e-05	NA	NA	FALSE	NA	FALSE	NA	Nucleus	NA		FALSE
mpc2	myh2	mpc2_myh2	0.3837	4.6513e-07	1.33396e-05	NA	NA	FALSE	NA	FALSE	NA	NA	NA		FALSE
atp5mpl	myh2	atp5mpl_myh2	0.486695	5.1461e-11	4.82119e-09	NA	NA	FALSE	NA	FALSE	NA	NA	NA		FALSE
dmac2l	myh2	dmac2l_myh2	0.345492	6.70698e-06	0.000126948	NA	NA	FALSE	NA	FALSE	NA	NA	NA		FALSE
sepsecs	myh2	myh2_sepsecs	0.392623	2.37109e-07	7.50225e-06	NA	NA	FALSE	NA	FALSE	NA	Vesicles	NA		FALSE
uqcr11	myh2	myh2_uqcr11	0.377202	7.50455e-07	2.00375e-05	NA	NA	FALSE	NA	FALSE	NA	NA	NA		FALSE
timm8b	myh2	myh2_timm8b	0.405674	8.53254e-08	3.12043e-06	NA	NA	FALSE	NA	FALSE	NA	NA	NA		FALSE
neb	ryr1	neb_ryr1	0.714304	1.38734e-26	3.32258e-23	NA	NA	FALSE	NA	FALSE	467	NA	Golgi apparatus;Cytoplasm;Vesicles		FALSE
myh4	ryr1	myh4_ryr1	0.69113	2.47159e-24	4.01535e-21	NA	NA	FALSE	NA	FALSE	455	NA	Golgi apparatus;Cytoplasm;Vesicles		FALSE
dmd	ryr1	dmd_ryr1	0.412375	4.96248e-08	1.95675e-06	NA	NA	FALSE	NA	FALSE	572	NA	Golgi apparatus;Cytoplasm;Vesicles		FALSE
myom1	ryr1	myom1_ryr1	0.620597	1.27137e-18	7.00804e-16	NA	NA	FALSE	NA	FALSE	408	NA	Golgi apparatus;Cytoplasm;Vesicles		FALSE
dync1h1	ryr1	dync1h1_ryr1	0.311472	5.4715e-05	0.000720264	NA	NA	FALSE	NA	FALSE	NA	Centrosome;Cytosol	Golgi apparatus;Cytoplasm;Vesicles		FALSE
myom2	ryr1	myom2_ryr1	0.709212	4.52451e-26	9.96111e-23	NA	NA	FALSE	NA	FALSE	267	Mitochondria;Cytoplasm	Golgi apparatus;Cytoplasm;Vesicles	Cytoplasm	TRUE
atp2a1	ryr1	atp2a1_ryr1	0.507336	5.58958e-12	6.75081e-10	NA	NA	FALSE	NA	FALSE	895	Endoplasmic reticulum;Cytoplasm	Golgi apparatus;Cytoplasm;Vesicles	Cytoplasm	TRUE
actn3	ryr1	actn3_ryr1	0.858403	3.02022e-48	1.3023e-43	NA	NA	FALSE	NA	FALSE	462	NA	Golgi apparatus;Cytoplasm;Vesicles		FALSE
agl	ryr1	agl_ryr1	0.729192	3.75308e-28	1.16304e-24	NA	NA	FALSE	NA	FALSE	233	Nucleoplasm;Nucleus	Golgi apparatus;Cytoplasm;Vesicles		FALSE
mybpc2	ryr1	mybpc2_ryr1	0.682054	1.65124e-23	2.29578e-20	NA	NA	FALSE	NA	FALSE	349	NA	Golgi apparatus;Cytoplasm;Vesicles		FALSE
pygm	ryr1	pygm_ryr1	0.723671	1.47137e-27	4.172e-24	NA	NA	FALSE	NA	FALSE	463	NA	Golgi apparatus;Cytoplasm;Vesicles		FALSE
acta1	ryr1	acta1_ryr1	0.826529	8.89185e-42	1.99806e-37	NA	NA	FALSE	NA	FALSE	504	NA	Golgi apparatus;Cytoplasm;Vesicles		FALSE
lama2	ryr1	lama2_ryr1	0.387454	3.51171e-07	1.04928e-05	NA	NA	FALSE	NA	FALSE	420	NA	Golgi apparatus;Cytoplasm;Vesicles		FALSE
clip1	ryr1	clip1_ryr1	0.331241	1.66572e-05	0.00027068	NA	NA	FALSE	NA	FALSE	NA	Microtubule ends;Microtubules;Cytoskeleton;Cytosol	Golgi apparatus;Cytoplasm;Vesicles		FALSE
ugp2	ryr1	ryr1_ugp2	0.376272	8.02948e-07	2.12215e-05	NA	NA	FALSE	NA	FALSE	NA	Centrosome;Mitochondria;Cytoplasm	Golgi apparatus;Cytoplasm;Vesicles	Cytoplasm	TRUE
gpd2	ryr1	gpd2_ryr1	0.413865	4.39186e-08	1.76121e-06	NA	NA	FALSE	NA	FALSE	NA	NA	Golgi apparatus;Cytoplasm;Vesicles		FALSE
pgm2	ryr1	pgm2_ryr1	0.747266	3.3535e-30	1.44536e-26	NA	NA	FALSE	NA	FALSE	NA	Intermediate filaments	Golgi apparatus;Cytoplasm;Vesicles		FALSE
gpi1	ryr1	gpi1_ryr1	0.516322	2.02764e-12	2.73842e-10	NA	NA	FALSE	NA	FALSE	NA	NA	Golgi apparatus;Cytoplasm;Vesicles		FALSE
mylpf	ryr1	mylpf_ryr1	0.396789	1.71912e-07	5.6933e-06	NA	NA	FALSE	NA	FALSE	603	NA	Golgi apparatus;Cytoplasm;Vesicles		FALSE
dst	ryr1	dst_ryr1	0.342132	8.34481e-06	0.00015233	NA	NA	FALSE	NA	FALSE	NA	Nucleus;Microtubules	Golgi apparatus;Cytoplasm;Vesicles		FALSE
ecpas	ryr1	ecpas_ryr1	0.378533	6.80973e-07	1.84478e-05	NA	NA	FALSE	NA	FALSE	NA	NA	Golgi apparatus;Cytoplasm;Vesicles		FALSE
cand2	ryr1	cand2_ryr1	0.380637	5.83553e-07	1.61752e-05	NA	NA	FALSE	NA	FALSE	NA	Nuclear bodies;Nucleoplasm;Nucleus	Golgi apparatus;Cytoplasm;Vesicles		FALSE
lrpprc	ryr1	lrpprc_ryr1	0.34133	8.78835e-06	0.000159085	NA	NA	FALSE	NA	FALSE	NA	Mitochondria;Cytoplasm	Golgi apparatus;Cytoplasm;Vesicles	Cytoplasm	TRUE
aldoart1	ryr1	aldoart1_ryr1	0.443558	3.39036e-09	1.90791e-07	NA	NA	FALSE	NA	FALSE	NA	NA	Golgi apparatus;Cytoplasm;Vesicles		FALSE
dnm1l	ryr1	dnm1l_ryr1	0.392281	2.43401e-07	7.67184e-06	NA	NA	FALSE	NA	FALSE	NA	Cytosol	Golgi apparatus;Cytoplasm;Vesicles		FALSE
phkb	ryr1	phkb_ryr1	0.636064	9.50299e-20	6.56094e-17	NA	NA	FALSE	NA	FALSE	258	Golgi apparatus;Cytoplasm	Golgi apparatus;Cytoplasm;Vesicles	Golgi apparatus;Cytoplasm	TRUE
oplah	ryr1	oplah_ryr1	0.364526	1.85274e-06	4.30713e-05	NA	NA	FALSE	NA	FALSE	NA	Nucleoli;Nucleus (Fibrillar center)	Golgi apparatus;Cytoplasm;Vesicles		FALSE
adssl1	ryr1	adssl1_ryr1	0.601841	2.45031e-17	1.02925e-14	NA	NA	FALSE	NA	FALSE	187	NA	Golgi apparatus;Cytoplasm;Vesicles		FALSE
cacna1s	ryr1	cacna1s_ryr1	0.856552	7.89765e-48	3.25863e-43	NA	NA	FALSE	NA	FALSE	987	NA	Golgi apparatus;Cytoplasm;Vesicles		FALSE
casq1	ryr1	casq1_ryr1	0.575691	1.11179e-15	3.25323e-13	NA	NA	FALSE	NA	FALSE	783	Nucleoplasm;Nucleus;Mitochondria;Cytoplasm	Golgi apparatus;Cytoplasm;Vesicles	Cytoplasm	TRUE
gpd1	ryr1	gpd1_ryr1	0.67589	5.77118e-23	7.31821e-20	NA	NA	FALSE	NA	FALSE	NA	NA	Golgi apparatus;Cytoplasm;Vesicles		FALSE
gys1	ryr1	gys1_ryr1	0.540366	1.15644e-13	2.12636e-11	NA	NA	FALSE	NA	FALSE	187	Microtubules;Cytosol	Golgi apparatus;Cytoplasm;Vesicles		FALSE
myoz1	ryr1	myoz1_ryr1	0.696476	7.81243e-25	1.38612e-21	NA	NA	FALSE	NA	FALSE	386	NA	Golgi apparatus;Cytoplasm;Vesicles		FALSE
ldha	ryr1	ldha_ryr1	0.728302	4.68791e-28	1.43234e-24	NA	NA	FALSE	NA	FALSE	NA	Cytosol	Golgi apparatus;Cytoplasm;Vesicles		FALSE
npepps	ryr1	npepps_ryr1	0.381422	5.5072e-07	1.53969e-05	NA	NA	FALSE	NA	FALSE	NA	Cytosol	Golgi apparatus;Cytoplasm;Vesicles		FALSE
vdac1	ryr1	ryr1_vdac1	0.5475	4.72805e-14	9.52325e-12	NA	NA	FALSE	NA	FALSE	167	Cytosol	Golgi apparatus;Cytoplasm;Vesicles		FALSE
klhl41	ryr1	klhl41_ryr1	0.408692	6.69434e-08	2.5323e-06	NA	NA	FALSE	NA	FALSE	298	Cytosol;Plasma membrane	Golgi apparatus;Cytoplasm;Vesicles		FALSE
gart	ryr1	gart_ryr1	0.477719	1.29149e-10	1.08593e-08	NA	NA	FALSE	NA	FALSE	NA	Nucleoplasm;Nucleus;Cytosol;Mitochondria;Cytoplasm	Golgi apparatus;Cytoplasm;Vesicles	Cytoplasm	TRUE
tmod4	ryr1	ryr1_tmod4	0.677026	4.5928e-23	5.90445e-20	NA	NA	FALSE	NA	FALSE	NA	NA	Golgi apparatus;Cytoplasm;Vesicles		FALSE
sucla2	ryr1	ryr1_sucla2	0.363944	1.92945e-06	4.45807e-05	NA	NA	FALSE	NA	FALSE	NA	Mitochondria;Cytoplasm	Golgi apparatus;Cytoplasm;Vesicles	Cytoplasm	TRUE
ddb1	ryr1	ddb1_ryr1	0.623881	7.4194e-19	4.29813e-16	NA	NA	FALSE	NA	FALSE	NA	Nucleoplasm;Nucleus	Golgi apparatus;Cytoplasm;Vesicles		FALSE
pgam2	ryr1	pgam2_ryr1	0.58743	2.09267e-16	7.19104e-14	NA	NA	FALSE	NA	FALSE	367	Nucleus;Nucleoli	Golgi apparatus;Cytoplasm;Vesicles		FALSE
capn1	ryr1	capn1_ryr1	0.633975	1.36063e-19	9.10368e-17	NA	NA	FALSE	NA	FALSE	362	Cytosol	Golgi apparatus;Cytoplasm;Vesicles		FALSE
prep	ryr1	prep_ryr1	0.534131	2.48417e-13	4.21007e-11	NA	NA	FALSE	NA	FALSE	NA	Cytosol	Golgi apparatus;Cytoplasm;Vesicles		FALSE
tpi1	ryr1	ryr1_tpi1	0.505777	6.64462e-12	7.87451e-10	NA	NA	FALSE	NA	FALSE	NA	Nucleoplasm;Nucleus	Golgi apparatus;Cytoplasm;Vesicles		FALSE
cacnb1	ryr1	cacnb1_ryr1	0.699298	4.20999e-25	7.83288e-22	NA	NA	FALSE	NA	FALSE	712	NA	Golgi apparatus;Cytoplasm;Vesicles		FALSE
psmd1	ryr1	psmd1_ryr1	0.337202	1.14476e-05	0.000198243	NA	NA	FALSE	NA	FALSE	NA	Nucleoplasm;Nucleus	Golgi apparatus;Cytoplasm;Vesicles		FALSE
ppp2r1a	ryr1	ppp2r1a_ryr1	0.462335	5.88278e-10	4.12012e-08	NA	NA	FALSE	NA	FALSE	NA	Cytosol	Golgi apparatus;Cytoplasm;Vesicles		FALSE
adsl	ryr1	adsl_ryr1	0.626469	4.83074e-19	2.90339e-16	NA	NA	FALSE	NA	FALSE	NA	Cytosol	Golgi apparatus;Cytoplasm;Vesicles		FALSE
ipo5	ryr1	ipo5_ryr1	0.420213	2.59274e-08	1.11749e-06	NA	NA	FALSE	NA	FALSE	NA	Nucleoplasm;Nucleus;Cytosol	Golgi apparatus;Cytoplasm;Vesicles		FALSE
pbxip1	ryr1	pbxip1_ryr1	0.38359	4.68979e-07	1.34336e-05	NA	NA	FALSE	NA	FALSE	NA	Vesicles	Golgi apparatus;Cytoplasm;Vesicles	Vesicles	TRUE
nomo1	ryr1	nomo1_ryr1	0.371927	1.09822e-06	2.76708e-05	NA	NA	FALSE	NA	FALSE	NA	Endoplasmic reticulum;Cytoplasm	Golgi apparatus;Cytoplasm;Vesicles	Cytoplasm	TRUE
ank1	ryr1	ank1_ryr1	0.418185	3.072e-08	1.2941e-06	NA	NA	FALSE	NA	FALSE	561	NA	Golgi apparatus;Cytoplasm;Vesicles		FALSE
smyd1	ryr1	ryr1_smyd1	0.60671	1.15809e-17	5.21173e-15	NA	NA	FALSE	NA	FALSE	NA	NA	Golgi apparatus;Cytoplasm;Vesicles		FALSE
nampt	ryr1	nampt_ryr1	0.376104	8.12773e-07	2.14412e-05	NA	NA	FALSE	NA	FALSE	NA	Nuclear speckles;Nucleoplasm;Nucleus	Golgi apparatus;Cytoplasm;Vesicles		FALSE
tnnt3	ryr1	ryr1_tnnt3	0.319781	3.35279e-05	0.000482207	NA	NA	FALSE	NA	FALSE	574	NA	Golgi apparatus;Cytoplasm;Vesicles		FALSE
mylk2	ryr1	mylk2_ryr1	0.516342	2.02318e-12	2.73281e-10	NA	NA	FALSE	NA	FALSE	402	Endoplasmic reticulum;Cytoplasm	Golgi apparatus;Cytoplasm;Vesicles	Cytoplasm	TRUE
ndufa9	ryr1	ndufa9_ryr1	0.37684	7.70479e-07	2.0489e-05	NA	NA	FALSE	NA	FALSE	NA	Nucleoplasm;Nucleus;Mitochondria;Cytoplasm	Golgi apparatus;Cytoplasm;Vesicles	Cytoplasm	TRUE
lta4h	ryr1	lta4h_ryr1	0.301067	9.90126e-05	0.00116829	NA	NA	FALSE	NA	FALSE	NA	Nucleoplasm;Nucleus	Golgi apparatus;Cytoplasm;Vesicles		FALSE
idh3g	ryr1	idh3g_ryr1	0.373876	9.54853e-07	2.45782e-05	NA	NA	FALSE	NA	FALSE	NA	Mitochondria;Cytoplasm	Golgi apparatus;Cytoplasm;Vesicles	Cytoplasm	TRUE
mybph	ryr1	mybph_ryr1	0.535264	2.16443e-13	3.72389e-11	NA	NA	FALSE	NA	FALSE	219	Nucleus;Mitochondria;Cytoplasm	Golgi apparatus;Cytoplasm;Vesicles	Cytoplasm	TRUE
jph2	ryr1	jph2_ryr1	0.701017	2.87822e-25	5.51698e-22	NA	NA	FALSE	NA	FALSE	751	NA	Golgi apparatus;Cytoplasm;Vesicles		FALSE
gm4737	ryr1	gm4737_ryr1	0.415839	3.73228e-08	1.53095e-06	NA	NA	FALSE	NA	FALSE	NA	NA	Golgi apparatus;Cytoplasm;Vesicles		FALSE
ahcy	ryr1	ahcy_ryr1	0.415839	3.73228e-08	1.53095e-06	NA	NA	FALSE	NA	FALSE	NA	Cytosol	Golgi apparatus;Cytoplasm;Vesicles		FALSE
slc25a4	ryr1	ryr1_slc25a4	0.48745	4.75699e-11	4.498e-09	NA	NA	FALSE	NA	FALSE	NA	Mitochondria;Cytoplasm	Golgi apparatus;Cytoplasm;Vesicles	Cytoplasm	TRUE
pdpr	ryr1	pdpr_ryr1	0.517464	1.77871e-12	2.43663e-10	NA	NA	FALSE	NA	FALSE	NA	Mitochondria;Cytoplasm	Golgi apparatus;Cytoplasm;Vesicles	Cytoplasm	TRUE
usp9x	ryr1	ryr1_usp9x	0.429996	1.12629e-08	5.42864e-07	NA	NA	FALSE	NA	FALSE	NA	Vesicles	Golgi apparatus;Cytoplasm;Vesicles	Vesicles	TRUE
atl2	ryr1	atl2_ryr1	0.57716	9.05456e-16	2.70112e-13	NA	NA	FALSE	NA	FALSE	NA	NA	Golgi apparatus;Cytoplasm;Vesicles		FALSE
cse1l	ryr1	cse1l_ryr1	0.449617	1.94893e-09	1.17558e-07	NA	NA	FALSE	NA	FALSE	NA	Nucleoplasm;Nucleus	Golgi apparatus;Cytoplasm;Vesicles		FALSE
cul5	ryr1	cul5_ryr1	0.602741	2.13517e-17	9.0868e-15	NA	NA	FALSE	NA	FALSE	NA	Golgi apparatus;Cytoplasm;Cytosol	Golgi apparatus;Cytoplasm;Vesicles	Golgi apparatus;Cytoplasm	TRUE
got1	ryr1	got1_ryr1	0.344122	7.33404e-06	0.000136774	NA	NA	FALSE	NA	FALSE	NA	Nucleoplasm;Nucleus	Golgi apparatus;Cytoplasm;Vesicles		FALSE
fhod1	ryr1	fhod1_ryr1	0.431793	9.63554e-09	4.74113e-07	NA	NA	FALSE	NA	FALSE	NA	Cytosol	Golgi apparatus;Cytoplasm;Vesicles		FALSE
cops4	ryr1	cops4_ryr1	0.549158	3.82923e-14	7.8754e-12	NA	NA	FALSE	NA	FALSE	NA	Nuclear speckles;Nucleoplasm;Nucleus	Golgi apparatus;Cytoplasm;Vesicles		FALSE
capza2	ryr1	capza2_ryr1	0.672719	1.08558e-22	1.30648e-19	NA	NA	FALSE	NA	FALSE	190	Endoplasmic reticulum;Cytoplasm	Golgi apparatus;Cytoplasm;Vesicles	Cytoplasm	TRUE
snta1	ryr1	ryr1_snta1	0.440005	4.66724e-09	2.52139e-07	NA	NA	FALSE	NA	FALSE	435	NA	Golgi apparatus;Cytoplasm;Vesicles		FALSE
dtna	ryr1	dtna_ryr1	0.365066	1.78418e-06	4.17262e-05	NA	NA	FALSE	NA	FALSE	415	Nucleoplasm;Nucleus;Intermediate filaments;Cell Junctions	Golgi apparatus;Cytoplasm;Vesicles		FALSE
rnh1	ryr1	rnh1_ryr1	0.492897	2.68247e-11	2.71002e-09	NA	NA	FALSE	NA	FALSE	NA	Nucleoplasm;Nucleus;Cytosol	Golgi apparatus;Cytoplasm;Vesicles		FALSE
pdlim5	ryr1	pdlim5_ryr1	0.35485	3.60033e-06	7.53845e-05	NA	NA	FALSE	NA	FALSE	NA	Nucleoplasm;Nucleus;Focal Adhesions;Plasma membrane	Golgi apparatus;Cytoplasm;Vesicles		FALSE
pdlim5	ryr1	pdlim5_ryr1	0.35485	3.60033e-06	7.53845e-05	NA	NA	FALSE	NA	FALSE	NA	Nucleoplasm;Nucleus;Focal Adhesions;Plasma membrane	Golgi apparatus;Cytoplasm;Vesicles		FALSE
park7	ryr1	park7_ryr1	0.504912	7.31049e-12	8.57006e-10	NA	NA	FALSE	NA	FALSE	NA	Nucleus;Cytosol	Golgi apparatus;Cytoplasm;Vesicles		FALSE
apeh	ryr1	apeh_ryr1	0.488067	4.46045e-11	4.24865e-09	NA	NA	FALSE	NA	FALSE	NA	Cytosol	Golgi apparatus;Cytoplasm;Vesicles		FALSE
emc1	ryr1	emc1_ryr1	0.312232	5.23487e-05	0.000694662	NA	NA	FALSE	NA	FALSE	NA	Microtubules	Golgi apparatus;Cytoplasm;Vesicles		FALSE
ola1	ryr1	ola1_ryr1	0.327314	2.12365e-05	0.000330852	NA	NA	FALSE	NA	FALSE	NA	Cytosol	Golgi apparatus;Cytoplasm;Vesicles		FALSE
yars	ryr1	ryr1_yars	0.446039	2.7062e-09	1.56644e-07	NA	NA	FALSE	NA	FALSE	NA	Cytosol	Golgi apparatus;Cytoplasm;Vesicles		FALSE
ywhae	ryr1	ryr1_ywhae	0.414633	4.12305e-08	1.66831e-06	NA	NA	FALSE	NA	FALSE	NA	Cytosol	Golgi apparatus;Cytoplasm;Vesicles		FALSE
mpi	ryr1	mpi_ryr1	0.612374	4.76575e-18	2.33208e-15	NA	NA	FALSE	NA	FALSE	NA	Cytosol	Golgi apparatus;Cytoplasm;Vesicles		FALSE
jph1	ryr1	jph1_ryr1	0.551137	2.9723e-14	6.27796e-12	NA	NA	FALSE	NA	FALSE	821	Nucleus	Golgi apparatus;Cytoplasm;Vesicles		FALSE
man2a2	ryr1	man2a2_ryr1	0.31443	4.60358e-05	0.000625427	NA	NA	FALSE	NA	FALSE	NA	NA	Golgi apparatus;Cytoplasm;Vesicles		FALSE
stat5b	ryr1	ryr1_stat5b	0.573671	1.47213e-15	4.19192e-13	NA	NA	FALSE	NA	FALSE	NA	NA	Golgi apparatus;Cytoplasm;Vesicles		FALSE
txnrd1	ryr1	ryr1_txnrd1	0.445633	2.80826e-09	1.61802e-07	NA	NA	FALSE	NA	FALSE	NA	Nucleus	Golgi apparatus;Cytoplasm;Vesicles		FALSE
gstp1	ryr1	gstp1_ryr1	0.438713	5.23769e-09	2.78709e-07	NA	NA	FALSE	NA	FALSE	NA	Cytosol;Mitochondria;Cytoplasm	Golgi apparatus;Cytoplasm;Vesicles	Cytoplasm	TRUE
gstm1	ryr1	gstm1_ryr1	0.460223	7.20186e-10	4.92143e-08	NA	NA	FALSE	NA	FALSE	NA	Mitochondria;Cytoplasm	Golgi apparatus;Cytoplasm;Vesicles	Cytoplasm	TRUE
samm50	ryr1	ryr1_samm50	0.324167	2.57374e-05	0.000387839	NA	NA	FALSE	NA	FALSE	NA	Mitochondria;Cytoplasm	Golgi apparatus;Cytoplasm;Vesicles	Cytoplasm	TRUE
dnpep	ryr1	dnpep_ryr1	0.355311	3.48981e-06	7.34378e-05	NA	NA	FALSE	NA	FALSE	NA	Cytosol	Golgi apparatus;Cytoplasm;Vesicles		FALSE
phkg1	ryr1	phkg1_ryr1	0.66355	6.46443e-22	6.76588e-19	NA	NA	FALSE	NA	FALSE	230	NA	Golgi apparatus;Cytoplasm;Vesicles		FALSE
pacsin3	ryr1	pacsin3_ryr1	0.399948	1.34324e-07	4.60598e-06	NA	NA	FALSE	NA	FALSE	NA	Cytosol	Golgi apparatus;Cytoplasm;Vesicles		FALSE
gphn	ryr1	gphn_ryr1	0.374616	9.0522e-07	2.34955e-05	NA	NA	FALSE	NA	FALSE	NA	Cytoplasmic bodies;Cytoplasm	Golgi apparatus;Cytoplasm;Vesicles	Cytoplasm	TRUE
cul4a	ryr1	cul4a_ryr1	0.473234	2.02499e-10	1.61447e-08	NA	NA	FALSE	NA	FALSE	NA	Nucleoplasm;Nucleus	Golgi apparatus;Cytoplasm;Vesicles		FALSE
adh5	ryr1	adh5_ryr1	0.465163	4.47679e-10	3.24306e-08	NA	NA	FALSE	NA	FALSE	NA	NA	Golgi apparatus;Cytoplasm;Vesicles		FALSE
serpinb6a	ryr1	ryr1_serpinb6a	0.350029	4.97281e-06	9.88278e-05	NA	NA	FALSE	NA	FALSE	NA	NA	Golgi apparatus;Cytoplasm;Vesicles		FALSE
stac3	ryr1	ryr1_stac3	0.769296	6.02246e-33	3.94863e-29	NA	NA	FALSE	NA	FALSE	903	Nucleoplasm;Nucleus	Golgi apparatus;Cytoplasm;Vesicles		FALSE
ndrg2	ryr1	ndrg2_ryr1	0.453794	1.3222e-09	8.37713e-08	NA	NA	FALSE	NA	FALSE	NA	Microtubule organizing center;Cytoskeleton	Golgi apparatus;Cytoplasm;Vesicles		FALSE
gstm2	ryr1	gstm2_ryr1	0.5257	6.81557e-13	1.03666e-10	NA	NA	FALSE	NA	FALSE	194	Cytosol	Golgi apparatus;Cytoplasm;Vesicles		FALSE
prkar2a	ryr1	prkar2a_ryr1	0.526636	6.10163e-13	9.39591e-11	NA	NA	FALSE	NA	FALSE	NA	Golgi apparatus;Cytoplasm;Vesicles;Microtubule organizing center;Cytoskeleton	Golgi apparatus;Cytoplasm;Vesicles	Golgi apparatus;Cytoplasm;Vesicles	TRUE
usp14	ryr1	ryr1_usp14	0.420277	2.57893e-08	1.11226e-06	NA	NA	FALSE	NA	FALSE	NA	Cytosol	Golgi apparatus;Cytoplasm;Vesicles		FALSE
plaa	ryr1	plaa_ryr1	0.439412	4.92124e-09	2.64053e-07	NA	NA	FALSE	NA	FALSE	NA	Cytosol;Plasma membrane	Golgi apparatus;Cytoplasm;Vesicles		FALSE
ago2	ryr1	ago2_ryr1	0.366642	1.59755e-06	3.80067e-05	NA	NA	FALSE	NA	FALSE	NA	Nucleoplasm;Nucleus;Cell Junctions	Golgi apparatus;Cytoplasm;Vesicles		FALSE
abcb7	ryr1	abcb7_ryr1	0.316521	4.07006e-05	0.000565306	NA	NA	FALSE	NA	FALSE	NA	Mitochondria;Cytoplasm	Golgi apparatus;Cytoplasm;Vesicles	Cytoplasm	TRUE
psmd12	ryr1	psmd12_ryr1	0.507301	5.61096e-12	6.77441e-10	NA	NA	FALSE	NA	FALSE	NA	Microtubules	Golgi apparatus;Cytoplasm;Vesicles		FALSE
sh3bgr	ryr1	ryr1_sh3bgr	0.357818	2.94329e-06	6.36325e-05	NA	NA	FALSE	NA	FALSE	NA	Cytosol;Plasma membrane	Golgi apparatus;Cytoplasm;Vesicles		FALSE
prkaa2	ryr1	prkaa2_ryr1	0.631258	2.16097e-19	1.38962e-16	NA	NA	FALSE	NA	FALSE	NA	Nuclear speckles;Nucleoplasm;Nucleus	Golgi apparatus;Cytoplasm;Vesicles		FALSE
me3	ryr1	me3_ryr1	0.367551	1.49857e-06	3.60022e-05	NA	NA	FALSE	NA	FALSE	NA	NA	Golgi apparatus;Cytoplasm;Vesicles		FALSE
scrn3	ryr1	ryr1_scrn3	0.527495	5.5101e-13	8.57649e-11	NA	NA	FALSE	NA	FALSE	NA	Vesicles;Cytosol	Golgi apparatus;Cytoplasm;Vesicles	Vesicles	TRUE
akr1b3	ryr1	akr1b3_ryr1	0.523786	8.53676e-13	1.2662e-10	NA	NA	FALSE	NA	FALSE	NA	NA	Golgi apparatus;Cytoplasm;Vesicles		FALSE
aldh7a1	ryr1	aldh7a1_ryr1	0.334186	1.38537e-05	0.000232237	NA	NA	FALSE	NA	FALSE	NA	Mitochondria;Cytoplasm	Golgi apparatus;Cytoplasm;Vesicles	Cytoplasm	TRUE
ppp1r7	ryr1	ppp1r7_ryr1	0.495481	2.03694e-11	2.12408e-09	NA	NA	FALSE	NA	FALSE	NA	Nucleoli;Nucleus	Golgi apparatus;Cytoplasm;Vesicles		FALSE
ppp5c	ryr1	ppp5c_ryr1	0.366627	1.59922e-06	3.80415e-05	NA	NA	FALSE	NA	FALSE	NA	Vesicles;Cytosol	Golgi apparatus;Cytoplasm;Vesicles	Vesicles	TRUE
cops3	ryr1	cops3_ryr1	0.462148	5.98963e-10	4.18588e-08	NA	NA	FALSE	NA	FALSE	NA	Nucleus	Golgi apparatus;Cytoplasm;Vesicles		FALSE
l2hgdh	ryr1	l2hgdh_ryr1	0.383755	4.63236e-07	1.32935e-05	NA	NA	FALSE	NA	FALSE	NA	Mitochondria;Cytoplasm	Golgi apparatus;Cytoplasm;Vesicles	Cytoplasm	TRUE
gpd1l	ryr1	gpd1l_ryr1	0.324622	2.50351e-05	0.00037905	NA	NA	FALSE	NA	FALSE	NA	NA	Golgi apparatus;Cytoplasm;Vesicles		FALSE
gps1	ryr1	gps1_ryr1	0.590355	1.36569e-16	4.89278e-14	NA	NA	FALSE	NA	FALSE	NA	NA	Golgi apparatus;Cytoplasm;Vesicles		FALSE
sirt2	ryr1	ryr1_sirt2	0.308457	6.51246e-05	0.000830339	NA	NA	FALSE	NA	FALSE	NA	Nucleoli;Nucleus	Golgi apparatus;Cytoplasm;Vesicles		FALSE
rabggta	ryr1	rabggta_ryr1	0.534	2.52389e-13	4.27027e-11	NA	NA	FALSE	NA	FALSE	NA	Nucleoplasm;Nucleus	Golgi apparatus;Cytoplasm;Vesicles		FALSE
hint1	ryr1	hint1_ryr1	0.410061	5.99171e-08	2.30156e-06	NA	NA	FALSE	NA	FALSE	NA	Cytosol	Golgi apparatus;Cytoplasm;Vesicles		FALSE
prdx3	ryr1	prdx3_ryr1	0.366455	1.6187e-06	3.84369e-05	NA	NA	FALSE	NA	FALSE	NA	NA	Golgi apparatus;Cytoplasm;Vesicles		FALSE
macrod1	ryr1	macrod1_ryr1	0.543566	7.76263e-14	1.48788e-11	NA	NA	FALSE	NA	FALSE	NA	Nucleoplasm;Nucleus	Golgi apparatus;Cytoplasm;Vesicles		FALSE
mtch2	ryr1	mtch2_ryr1	0.431049	1.02795e-08	5.01507e-07	NA	NA	FALSE	NA	FALSE	NA	Mitochondria;Cytoplasm	Golgi apparatus;Cytoplasm;Vesicles	Cytoplasm	TRUE
cobl	ryr1	cobl_ryr1	0.333235	1.4706e-05	0.000244118	NA	NA	FALSE	NA	FALSE	NA	Cell Junctions;Plasma membrane	Golgi apparatus;Cytoplasm;Vesicles		FALSE
prune1	ryr1	prune1_ryr1	0.415847	3.72991e-08	1.53009e-06	NA	NA	FALSE	NA	FALSE	NA	NA	Golgi apparatus;Cytoplasm;Vesicles		FALSE
cab39	ryr1	cab39_ryr1	0.323132	2.74046e-05	0.000408457	NA	NA	FALSE	NA	FALSE	NA	Nucleoli;Nucleus	Golgi apparatus;Cytoplasm;Vesicles		FALSE
map2k4	ryr1	map2k4_ryr1	0.574287	1.35166e-15	3.87993e-13	NA	NA	FALSE	NA	FALSE	NA	Nucleoplasm;Nucleus	Golgi apparatus;Cytoplasm;Vesicles		FALSE
rtca	ryr1	rtca_ryr1	0.412227	5.02309e-08	1.97719e-06	NA	NA	FALSE	NA	FALSE	NA	Nucleus	Golgi apparatus;Cytoplasm;Vesicles		FALSE
carns1	ryr1	carns1_ryr1	0.475683	1.58534e-10	1.30146e-08	NA	NA	FALSE	NA	FALSE	NA	NA	Golgi apparatus;Cytoplasm;Vesicles		FALSE
uba3	ryr1	ryr1_uba3	0.319067	3.49887e-05	0.000499462	NA	NA	FALSE	NA	FALSE	NA	Cytosol;Plasma membrane	Golgi apparatus;Cytoplasm;Vesicles		FALSE
dhdh	ryr1	dhdh_ryr1	0.430533	1.0751e-08	5.21411e-07	NA	NA	FALSE	NA	FALSE	NA	Nucleoplasm;Nucleus;Actin filaments;Cytoskeleton	Golgi apparatus;Cytoplasm;Vesicles		FALSE
tbc1d1	ryr1	ryr1_tbc1d1	0.380559	5.86904e-07	1.62541e-05	NA	NA	FALSE	NA	FALSE	NA	Nucleoli;Nucleus	Golgi apparatus;Cytoplasm;Vesicles		FALSE
nek9	ryr1	nek9_ryr1	0.351058	4.64383e-06	9.33405e-05	NA	NA	FALSE	NA	FALSE	NA	Mitochondria;Cytoplasm	Golgi apparatus;Cytoplasm;Vesicles	Cytoplasm	TRUE
ncln	ryr1	ncln_ryr1	0.39274	2.34978e-07	7.44375e-06	NA	NA	FALSE	NA	FALSE	NA	Lipid droplets	Golgi apparatus;Cytoplasm;Vesicles		FALSE
nt5c1a	ryr1	nt5c1a_ryr1	0.453264	1.38936e-09	8.74882e-08	NA	NA	FALSE	NA	FALSE	NA	NA	Golgi apparatus;Cytoplasm;Vesicles		FALSE
nudt2	ryr1	nudt2_ryr1	0.323492	2.68133e-05	0.000401166	NA	NA	FALSE	NA	FALSE	NA	Nucleoplasm;Nucleus	Golgi apparatus;Cytoplasm;Vesicles		FALSE
hdhd2	ryr1	hdhd2_ryr1	0.452939	1.43208e-09	8.98432e-08	NA	NA	FALSE	NA	FALSE	NA	Vesicles	Golgi apparatus;Cytoplasm;Vesicles	Vesicles	TRUE
ubac1	ryr1	ryr1_ubac1	0.431551	9.84042e-09	4.82876e-07	NA	NA	FALSE	NA	FALSE	NA	Cytosol;Plasma membrane	Golgi apparatus;Cytoplasm;Vesicles		FALSE
nqo2	ryr1	nqo2_ryr1	0.477116	1.37251e-10	1.14595e-08	NA	NA	FALSE	NA	FALSE	NA	Cytosol	Golgi apparatus;Cytoplasm;Vesicles		FALSE
atp2b3	ryr1	atp2b3_ryr1	0.319287	3.45325e-05	0.000494048	NA	NA	FALSE	NA	FALSE	403	Golgi apparatus;Cytoplasm;Plasma membrane	Golgi apparatus;Cytoplasm;Vesicles	Golgi apparatus;Cytoplasm	TRUE
npepl1	ryr1	npepl1_ryr1	0.313878	4.75517e-05	0.000642197	NA	NA	FALSE	NA	FALSE	NA	Nucleoplasm;Nucleus	Golgi apparatus;Cytoplasm;Vesicles		FALSE
sgcb	ryr1	ryr1_sgcb	0.368831	1.36897e-06	3.33521e-05	NA	NA	FALSE	NA	FALSE	492	Cytosol	Golgi apparatus;Cytoplasm;Vesicles		FALSE
hhatl	ryr1	hhatl_ryr1	0.631021	2.24935e-19	1.4421e-16	NA	NA	FALSE	NA	FALSE	229	NA	Golgi apparatus;Cytoplasm;Vesicles		FALSE
ndufb7	ryr1	ndufb7_ryr1	0.401571	1.18215e-07	4.1285e-06	NA	NA	FALSE	NA	FALSE	NA	NA	Golgi apparatus;Cytoplasm;Vesicles		FALSE
otub1	ryr1	otub1_ryr1	0.305465	7.72669e-05	0.000954643	NA	NA	FALSE	NA	FALSE	NA	Nucleus;Cytosol	Golgi apparatus;Cytoplasm;Vesicles		FALSE
vps25	ryr1	ryr1_vps25	0.359751	2.57857e-06	5.6931e-05	NA	NA	FALSE	NA	FALSE	NA	Centrosome	Golgi apparatus;Cytoplasm;Vesicles		FALSE
cisd1	ryr1	cisd1_ryr1	0.463794	5.1111e-10	3.64192e-08	NA	NA	FALSE	NA	FALSE	NA	Mitochondria;Cytoplasm	Golgi apparatus;Cytoplasm;Vesicles	Cytoplasm	TRUE
prkag1	ryr1	prkag1_ryr1	0.516467	1.9944e-12	2.69836e-10	NA	NA	FALSE	NA	FALSE	NA	Nucleoplasm;Nucleus;Cytosol	Golgi apparatus;Cytoplasm;Vesicles		FALSE
kyat1	ryr1	kyat1_ryr1	0.453002	1.42373e-09	8.93895e-08	NA	NA	FALSE	NA	FALSE	NA	NA	Golgi apparatus;Cytoplasm;Vesicles		FALSE
tapt1	ryr1	ryr1_tapt1	0.532691	2.95738e-13	4.92134e-11	NA	NA	FALSE	NA	FALSE	NA	Vesicles	Golgi apparatus;Cytoplasm;Vesicles	Vesicles	TRUE
impad1	ryr1	impad1_ryr1	0.437098	6.0457e-09	3.15841e-07	NA	NA	FALSE	NA	FALSE	NA	Golgi apparatus;Cytoplasm	Golgi apparatus;Cytoplasm;Vesicles	Golgi apparatus;Cytoplasm	TRUE
crot	ryr1	crot_ryr1	0.53067	3.77226e-13	6.10987e-11	NA	NA	FALSE	NA	FALSE	NA	Vesicles	Golgi apparatus;Cytoplasm;Vesicles	Vesicles	TRUE
cops6	ryr1	cops6_ryr1	0.621668	1.06731e-18	5.97719e-16	NA	NA	FALSE	NA	FALSE	NA	Nucleoplasm;Nucleus	Golgi apparatus;Cytoplasm;Vesicles		FALSE
mapk9	ryr1	mapk9_ryr1	0.542626	8.73112e-14	1.65339e-11	NA	NA	FALSE	NA	FALSE	NA	NA	Golgi apparatus;Cytoplasm;Vesicles		FALSE
mdp1	ryr1	mdp1_ryr1	0.516754	1.9299e-12	2.62027e-10	NA	NA	FALSE	NA	FALSE	NA	Nucleoplasm;Nucleus	Golgi apparatus;Cytoplasm;Vesicles		FALSE
carnmt1	ryr1	carnmt1_ryr1	0.388383	3.27394e-07	9.8814e-06	NA	NA	FALSE	NA	FALSE	NA	NA	Golgi apparatus;Cytoplasm;Vesicles		FALSE
arih1	ryr1	arih1_ryr1	0.324025	2.59606e-05	0.000390628	NA	NA	FALSE	NA	FALSE	NA	Golgi apparatus;Cytoplasm	Golgi apparatus;Cytoplasm;Vesicles	Golgi apparatus;Cytoplasm	TRUE
akr7a5	ryr1	akr7a5_ryr1	0.482401	8.01834e-11	7.12885e-09	NA	NA	FALSE	NA	FALSE	NA	NA	Golgi apparatus;Cytoplasm;Vesicles		FALSE
mri1	ryr1	mri1_ryr1	0.301614	9.60239e-05	0.0011396	NA	NA	FALSE	NA	FALSE	NA	Nucleoplasm;Nucleus;Nucleoli;Nucleus (Fibrillar center);Cytosol	Golgi apparatus;Cytoplasm;Vesicles		FALSE
tmem38a	ryr1	ryr1_tmem38a	0.500872	1.13833e-11	1.26902e-09	NA	NA	FALSE	NA	FALSE	408	Nucleus	Golgi apparatus;Cytoplasm;Vesicles		FALSE
ubr3	ryr1	ryr1_ubr3	0.307346	6.94051e-05	0.000874512	NA	NA	FALSE	NA	FALSE	NA	Nucleus;Nucleoli	Golgi apparatus;Cytoplasm;Vesicles		FALSE
bpgm	ryr1	bpgm_ryr1	0.373847	9.56814e-07	2.46213e-05	NA	NA	FALSE	NA	FALSE	NA	Nucleoli;Nucleus	Golgi apparatus;Cytoplasm;Vesicles		FALSE
setd7	ryr1	ryr1_setd7	0.307373	6.92976e-05	0.000873413	NA	NA	FALSE	NA	FALSE	NA	Nucleoli;Nucleus	Golgi apparatus;Cytoplasm;Vesicles		FALSE
epm2aip1	ryr1	epm2aip1_ryr1	0.3428	7.99175e-06	0.000146927	NA	NA	FALSE	NA	FALSE	NA	NA	Golgi apparatus;Cytoplasm;Vesicles		FALSE
pter	ryr1	pter_ryr1	0.42951	1.17469e-08	5.63079e-07	NA	NA	FALSE	NA	FALSE	NA	Nucleoplasm;Nucleus	Golgi apparatus;Cytoplasm;Vesicles		FALSE
prkcq	ryr1	prkcq_ryr1	0.367285	1.52686e-06	3.6579e-05	NA	NA	FALSE	NA	FALSE	NA	Microtubule organizing center;Cytoskeleton	Golgi apparatus;Cytoplasm;Vesicles		FALSE
eloc	ryr1	eloc_ryr1	0.382223	5.19025e-07	1.46376e-05	NA	NA	FALSE	NA	FALSE	NA	NA	Golgi apparatus;Cytoplasm;Vesicles		FALSE
apip	ryr1	apip_ryr1	0.320842	3.14613e-05	0.000457614	NA	NA	FALSE	NA	FALSE	NA	Nucleoplasm;Nucleus	Golgi apparatus;Cytoplasm;Vesicles		FALSE
impa1	ryr1	impa1_ryr1	0.334717	1.33977e-05	0.000225874	NA	NA	FALSE	NA	FALSE	NA	Mitochondria;Cytoplasm	Golgi apparatus;Cytoplasm;Vesicles	Cytoplasm	TRUE
stk38	ryr1	ryr1_stk38	0.380855	5.74237e-07	1.59571e-05	NA	NA	FALSE	NA	FALSE	NA	Cytosol	Golgi apparatus;Cytoplasm;Vesicles		FALSE
nek7	ryr1	nek7_ryr1	0.521753	1.08285e-12	1.56694e-10	NA	NA	FALSE	NA	FALSE	NA	Nucleoplasm;Nucleus	Golgi apparatus;Cytoplasm;Vesicles		FALSE
ufsp2	ryr1	ryr1_ufsp2	0.543929	7.41745e-14	1.42818e-11	NA	NA	FALSE	NA	FALSE	NA	Nucleus;Cytosol	Golgi apparatus;Cytoplasm;Vesicles		FALSE
ttc37	ryr1	ryr1_ttc37	0.391731	2.53856e-07	7.9525e-06	NA	NA	FALSE	NA	FALSE	NA	Nucleoplasm;Nucleus	Golgi apparatus;Cytoplasm;Vesicles		FALSE
phpt1	ryr1	phpt1_ryr1	0.439628	4.82743e-09	2.59667e-07	NA	NA	FALSE	NA	FALSE	NA	Cytosol	Golgi apparatus;Cytoplasm;Vesicles		FALSE
dcaf6	ryr1	dcaf6_ryr1	0.316797	4.00426e-05	0.000557753	NA	NA	FALSE	NA	FALSE	NA	Nucleus;Focal Adhesions	Golgi apparatus;Cytoplasm;Vesicles		FALSE
mettl26	ryr1	mettl26_ryr1	0.55642	1.49935e-14	3.39448e-12	NA	NA	FALSE	NA	FALSE	NA	NA	Golgi apparatus;Cytoplasm;Vesicles		FALSE
tatdn1	ryr1	ryr1_tatdn1	0.349782	5.05513e-06	0.000100187	NA	NA	FALSE	NA	FALSE	NA	Nucleoplasm;Nucleus	Golgi apparatus;Cytoplasm;Vesicles		FALSE
thnsl2	ryr1	ryr1_thnsl2	0.339991	9.57957e-06	0.00017095	NA	NA	FALSE	NA	FALSE	NA	NA	Golgi apparatus;Cytoplasm;Vesicles		FALSE
nutf2	ryr1	nutf2_ryr1	0.501502	1.0627e-11	1.19403e-09	NA	NA	FALSE	NA	FALSE	NA	Microtubules	Golgi apparatus;Cytoplasm;Vesicles		FALSE
bola1	ryr1	bola1_ryr1	0.385844	3.96329e-07	1.16367e-05	NA	NA	FALSE	NA	FALSE	NA	NA	Golgi apparatus;Cytoplasm;Vesicles		FALSE
dpp9	ryr1	dpp9_ryr1	0.416108	3.65025e-08	1.50157e-06	NA	NA	FALSE	NA	FALSE	NA	Cytosol	Golgi apparatus;Cytoplasm;Vesicles		FALSE
eml2	ryr1	eml2_ryr1	0.333	1.49245e-05	0.000247133	NA	NA	FALSE	NA	FALSE	NA	Vesicles	Golgi apparatus;Cytoplasm;Vesicles	Vesicles	TRUE
lypla1	ryr1	lypla1_ryr1	0.536406	1.88281e-13	3.28603e-11	NA	NA	FALSE	NA	FALSE	NA	Cytosol	Golgi apparatus;Cytoplasm;Vesicles		FALSE
cops8	ryr1	cops8_ryr1	0.495267	2.08397e-11	2.16661e-09	NA	NA	FALSE	NA	FALSE	NA	Nucleoplasm;Nucleus	Golgi apparatus;Cytoplasm;Vesicles		FALSE
prps1l3	ryr1	prps1l3_ryr1	0.63279	1.66564e-19	1.09508e-16	NA	NA	FALSE	NA	FALSE	NA	NA	Golgi apparatus;Cytoplasm;Vesicles		FALSE
ube2k	ryr1	ryr1_ube2k	0.359138	2.68932e-06	5.89797e-05	NA	NA	FALSE	NA	FALSE	NA	Cytosol	Golgi apparatus;Cytoplasm;Vesicles		FALSE
2210016f16rik	ryr1	2210016f16rik_ryr1	0.347578	5.84827e-06	0.000113183	NA	NA	FALSE	NA	FALSE	NA	NA	Golgi apparatus;Cytoplasm;Vesicles		FALSE
psmd8	ryr1	psmd8_ryr1	0.48088	9.3687e-11	8.17393e-09	NA	NA	FALSE	NA	FALSE	NA	Cytosol	Golgi apparatus;Cytoplasm;Vesicles		FALSE
rrm1	ryr1	rrm1_ryr1	0.3615	2.28592e-06	5.1434e-05	NA	NA	FALSE	NA	FALSE	NA	Cytosol	Golgi apparatus;Cytoplasm;Vesicles		FALSE
fkbp1a	ryr1	fkbp1a_ryr1	0.449175	2.03e-09	1.21831e-07	NA	NA	FALSE	NA	FALSE	985	Microtubules	Golgi apparatus;Cytoplasm;Vesicles		FALSE
pfn2	ryr1	pfn2_ryr1	0.555056	1.79127e-14	3.98071e-12	NA	NA	FALSE	NA	FALSE	NA	NA	Golgi apparatus;Cytoplasm;Vesicles		FALSE
clcn1	ryr1	clcn1_ryr1	0.462424	5.83252e-10	4.09042e-08	NA	NA	FALSE	NA	FALSE	487	NA	Golgi apparatus;Cytoplasm;Vesicles		FALSE
tecr	ryr1	ryr1_tecr	0.580223	5.88101e-16	1.82862e-13	NA	NA	FALSE	NA	FALSE	NA	Endoplasmic reticulum;Cytoplasm	Golgi apparatus;Cytoplasm;Vesicles	Cytoplasm	TRUE
isoc1	ryr1	isoc1_ryr1	0.346725	6.18606e-06	0.000118632	NA	NA	FALSE	NA	FALSE	NA	Endoplasmic reticulum;Cytoplasm;Vesicles	Golgi apparatus;Cytoplasm;Vesicles	Cytoplasm;Vesicles	TRUE
vps13a	ryr1	ryr1_vps13a	0.395512	1.89816e-07	6.20172e-06	NA	NA	FALSE	NA	FALSE	NA	NA	Golgi apparatus;Cytoplasm;Vesicles		FALSE
mospd1	ryr1	mospd1_ryr1	0.55909	1.05613e-14	2.47605e-12	NA	NA	FALSE	NA	FALSE	NA	Nucleoplasm;Nucleus;Vesicles	Golgi apparatus;Cytoplasm;Vesicles	Vesicles	TRUE
gsk3b	ryr1	gsk3b_ryr1	0.364905	1.8044e-06	4.21218e-05	NA	NA	FALSE	NA	FALSE	210	Nucleus	Golgi apparatus;Cytoplasm;Vesicles		FALSE
rnpep	ryr1	rnpep_ryr1	0.419398	2.77593e-08	1.18534e-06	NA	NA	FALSE	NA	FALSE	363	Golgi apparatus;Cytoplasm	Golgi apparatus;Cytoplasm;Vesicles	Golgi apparatus;Cytoplasm	TRUE
sdr39u1	ryr1	ryr1_sdr39u1	0.350484	4.82458e-06	9.63519e-05	NA	NA	FALSE	NA	FALSE	NA	Nucleoplasm;Nucleus;Cytosol	Golgi apparatus;Cytoplasm;Vesicles		FALSE
epdr1	ryr1	epdr1_ryr1	0.404988	9.01348e-08	3.27042e-06	NA	NA	FALSE	NA	FALSE	NA	NA	Golgi apparatus;Cytoplasm;Vesicles		FALSE
ube2m	ryr1	ryr1_ube2m	0.489479	3.84758e-11	3.72795e-09	NA	NA	FALSE	NA	FALSE	NA	Nucleus	Golgi apparatus;Cytoplasm;Vesicles		FALSE
rpia	ryr1	rpia_ryr1	0.306218	7.40254e-05	0.000921785	NA	NA	FALSE	NA	FALSE	NA	Nucleoplasm;Nucleus;Vesicles;Plasma membrane	Golgi apparatus;Cytoplasm;Vesicles	Vesicles	TRUE
lgalsl	ryr1	lgalsl_ryr1	0.408086	7.02986e-08	2.64133e-06	NA	NA	FALSE	NA	FALSE	NA	Nucleoplasm;Nucleus	Golgi apparatus;Cytoplasm;Vesicles		FALSE
cradd	ryr1	cradd_ryr1	0.361249	2.32592e-06	5.21926e-05	NA	NA	FALSE	NA	FALSE	NA	Cytosol	Golgi apparatus;Cytoplasm;Vesicles		FALSE
rras2	ryr1	rras2_ryr1	0.365692	1.70762e-06	4.02169e-05	NA	NA	FALSE	NA	FALSE	NA	Nucleus;Cytosol	Golgi apparatus;Cytoplasm;Vesicles		FALSE
hspbp1	ryr1	hspbp1_ryr1	0.43858	5.30025e-09	2.81587e-07	NA	NA	FALSE	NA	FALSE	NA	Cytosol	Golgi apparatus;Cytoplasm;Vesicles		FALSE
gstm4	ryr1	gstm4_ryr1	0.370228	1.23972e-06	3.0666e-05	NA	NA	FALSE	NA	FALSE	NA	Mitochondria;Cytoplasm	Golgi apparatus;Cytoplasm;Vesicles	Cytoplasm	TRUE
epm2a	ryr1	epm2a_ryr1	0.503184	8.84121e-12	1.01423e-09	NA	NA	FALSE	NA	FALSE	NA	Nucleoplasm;Nucleus	Golgi apparatus;Cytoplasm;Vesicles		FALSE
pon2	ryr1	pon2_ryr1	0.367977	1.45411e-06	3.50954e-05	NA	NA	FALSE	NA	FALSE	NA	NA	Golgi apparatus;Cytoplasm;Vesicles		FALSE
fn3k	ryr1	fn3k_ryr1	0.619588	1.49827e-18	8.13693e-16	NA	NA	FALSE	NA	FALSE	NA	Mitochondria;Cytoplasm	Golgi apparatus;Cytoplasm;Vesicles	Cytoplasm	TRUE
prmt5	ryr1	prmt5_ryr1	0.344817	7.00939e-06	0.000131696	NA	NA	FALSE	NA	FALSE	NA	Nucleus;Cytosol	Golgi apparatus;Cytoplasm;Vesicles		FALSE
ubxn6	ryr1	ryr1_ubxn6	0.314771	4.51231e-05	0.000615235	NA	NA	FALSE	NA	FALSE	NA	Golgi apparatus;Cytoplasm;Cytosol	Golgi apparatus;Cytoplasm;Vesicles	Golgi apparatus;Cytoplasm	TRUE
armt1	ryr1	armt1_ryr1	0.540584	1.12556e-13	2.07576e-11	NA	NA	FALSE	NA	FALSE	NA	Nucleus;Nuclear bodies;Nucleoplasm;Cytosol	Golgi apparatus;Cytoplasm;Vesicles		FALSE
selenot	ryr1	ryr1_selenot	0.478588	1.18271e-10	1.00491e-08	NA	NA	FALSE	NA	FALSE	NA	NA	Golgi apparatus;Cytoplasm;Vesicles		FALSE
nt5dc3	ryr1	nt5dc3_ryr1	0.392854	2.32936e-07	7.38794e-06	NA	NA	FALSE	NA	FALSE	NA	Cytosol;Mitochondria;Cytoplasm	Golgi apparatus;Cytoplasm;Vesicles	Cytoplasm	TRUE
dcun1d2	ryr1	dcun1d2_ryr1	0.300986	9.94616e-05	0.00117255	NA	NA	FALSE	NA	FALSE	NA	Cytosol;Plasma membrane	Golgi apparatus;Cytoplasm;Vesicles		FALSE
cuta	ryr1	cuta_ryr1	0.382734	4.99737e-07	1.41744e-05	NA	NA	FALSE	NA	FALSE	NA	Focal Adhesions;Plasma membrane	Golgi apparatus;Cytoplasm;Vesicles		FALSE
isoc2a	ryr1	isoc2a_ryr1	0.318108	3.70454e-05	0.000523496	NA	NA	FALSE	NA	FALSE	NA	NA	Golgi apparatus;Cytoplasm;Vesicles		FALSE
guf1	ryr1	guf1_ryr1	0.306259	7.38511e-05	0.000920042	NA	NA	FALSE	NA	FALSE	NA	Nucleus;Mitochondria;Cytoplasm	Golgi apparatus;Cytoplasm;Vesicles	Cytoplasm	TRUE
dnase1l1	ryr1	dnase1l1_ryr1	0.456943	9.83451e-10	6.46544e-08	NA	NA	FALSE	NA	FALSE	NA	NA	Golgi apparatus;Cytoplasm;Vesicles		FALSE
ppp6c	ryr1	ppp6c_ryr1	0.343312	7.73074e-06	0.000142903	NA	NA	FALSE	NA	FALSE	NA	NA	Golgi apparatus;Cytoplasm;Vesicles		FALSE
ppme1	ryr1	ppme1_ryr1	0.317829	3.76642e-05	0.000530576	NA	NA	FALSE	NA	FALSE	NA	Nucleus	Golgi apparatus;Cytoplasm;Vesicles		FALSE
micu3	ryr1	micu3_ryr1	0.418967	2.87793e-08	1.22321e-06	NA	NA	FALSE	NA	FALSE	262	NA	Golgi apparatus;Cytoplasm;Vesicles		FALSE
khk	ryr1	khk_ryr1	0.439631	4.82575e-09	2.5959e-07	NA	NA	FALSE	NA	FALSE	NA	Cytosol	Golgi apparatus;Cytoplasm;Vesicles		FALSE
acyp2	ryr1	acyp2_ryr1	0.436812	6.20078e-09	3.22893e-07	NA	NA	FALSE	NA	FALSE	NA	Nucleoplasm;Nucleus	Golgi apparatus;Cytoplasm;Vesicles		FALSE
kcnj11	ryr1	kcnj11_ryr1	0.61182	5.20225e-18	2.52631e-15	NA	NA	FALSE	NA	FALSE	171	NA	Golgi apparatus;Cytoplasm;Vesicles		FALSE
eepd1	ryr1	eepd1_ryr1	0.314016	4.71683e-05	0.000637971	NA	NA	FALSE	NA	FALSE	NA	Nuclear speckles;Nucleoplasm;Nucleus	Golgi apparatus;Cytoplasm;Vesicles		FALSE
mapre3	ryr1	mapre3_ryr1	0.337431	1.12819e-05	0.000195847	NA	NA	FALSE	NA	FALSE	NA	Cytosol	Golgi apparatus;Cytoplasm;Vesicles		FALSE
rdh14	ryr1	rdh14_ryr1	0.327084	2.1538e-05	0.000334733	NA	NA	FALSE	NA	FALSE	NA	Nucleoplasm;Nucleus	Golgi apparatus;Cytoplasm;Vesicles		FALSE
aamdc	ryr1	aamdc_ryr1	0.439141	5.04156e-09	2.6965e-07	NA	NA	FALSE	NA	FALSE	NA	Nucleoplasm;Nucleus	Golgi apparatus;Cytoplasm;Vesicles		FALSE
rida	ryr1	rida_ryr1	0.373607	9.73493e-07	2.49857e-05	NA	NA	FALSE	NA	FALSE	NA	NA	Golgi apparatus;Cytoplasm;Vesicles		FALSE
aprt	ryr1	aprt_ryr1	0.338037	1.08551e-05	0.00018965	NA	NA	FALSE	NA	FALSE	NA	Nucleoplasm;Nucleus;Cytosol	Golgi apparatus;Cytoplasm;Vesicles		FALSE
rab21	ryr1	rab21_ryr1	0.326754	2.19789e-05	0.000340389	NA	NA	FALSE	NA	FALSE	NA	NA	Golgi apparatus;Cytoplasm;Vesicles		FALSE
phospho1	ryr1	phospho1_ryr1	0.344595	7.11139e-06	0.000133291	NA	NA	FALSE	NA	FALSE	NA	NA	Golgi apparatus;Cytoplasm;Vesicles		FALSE
nif3l1	ryr1	nif3l1_ryr1	0.381232	5.58505e-07	1.55833e-05	NA	NA	FALSE	NA	FALSE	NA	Vesicles	Golgi apparatus;Cytoplasm;Vesicles	Vesicles	TRUE
lrrc20	ryr1	lrrc20_ryr1	0.549323	3.74937e-14	7.72628e-12	NA	NA	FALSE	NA	FALSE	NA	Nucleoplasm;Nucleus	Golgi apparatus;Cytoplasm;Vesicles		FALSE
ube3c	ryr1	ryr1_ube3c	0.323908	2.61452e-05	0.000392919	NA	NA	FALSE	NA	FALSE	NA	Mitochondria;Cytoplasm	Golgi apparatus;Cytoplasm;Vesicles	Cytoplasm	TRUE
pgm2l1	ryr1	pgm2l1_ryr1	0.437138	6.02473e-09	3.14891e-07	NA	NA	FALSE	NA	FALSE	NA	Mitochondria;Cytoplasm	Golgi apparatus;Cytoplasm;Vesicles	Cytoplasm	TRUE
prxl2b	ryr1	prxl2b_ryr1	0.463752	5.13171e-10	3.65506e-08	NA	NA	FALSE	NA	FALSE	NA	NA	Golgi apparatus;Cytoplasm;Vesicles		FALSE
denr	ryr1	denr_ryr1	0.309048	6.29483e-05	0.000807631	NA	NA	FALSE	NA	FALSE	NA	Cytosol	Golgi apparatus;Cytoplasm;Vesicles		FALSE
kpna1	ryr1	kpna1_ryr1	0.430025	1.12345e-08	5.4171e-07	NA	NA	FALSE	NA	FALSE	NA	Nucleus	Golgi apparatus;Cytoplasm;Vesicles		FALSE
ndufa11	ryr1	ndufa11_ryr1	0.448393	2.18159e-09	1.29752e-07	NA	NA	FALSE	NA	FALSE	NA	Mitochondria;Cytoplasm	Golgi apparatus;Cytoplasm;Vesicles	Cytoplasm	TRUE
aup1	ryr1	aup1_ryr1	0.362973	2.06432e-06	4.71957e-05	NA	NA	FALSE	NA	FALSE	NA	Nucleoplasm;Nucleus;Vesicles	Golgi apparatus;Cytoplasm;Vesicles	Vesicles	TRUE
tor1b	ryr1	ryr1_tor1b	0.33132	1.65761e-05	0.000269593	NA	NA	FALSE	NA	FALSE	NA	Nuclear speckles;Nucleoplasm;Nucleus	Golgi apparatus;Cytoplasm;Vesicles		FALSE
nqo1	ryr1	nqo1_ryr1	0.398148	1.54646e-07	5.19986e-06	NA	NA	FALSE	NA	FALSE	NA	Cytosol	Golgi apparatus;Cytoplasm;Vesicles		FALSE
slc25a31	ryr1	ryr1_slc25a31	0.423706	1.93105e-08	8.66236e-07	NA	NA	FALSE	NA	FALSE	NA	Mitochondria;Cytoplasm	Golgi apparatus;Cytoplasm;Vesicles	Cytoplasm	TRUE
rraga	ryr1	rraga_ryr1	0.40503	8.98337e-08	3.26105e-06	NA	NA	FALSE	NA	FALSE	NA	Golgi apparatus;Cytoplasm;Vesicles	Golgi apparatus;Cytoplasm;Vesicles	Golgi apparatus;Cytoplasm;Vesicles	TRUE
msrb3	ryr1	msrb3_ryr1	0.339155	1.01066e-05	0.000178726	NA	NA	FALSE	NA	FALSE	158	NA	Golgi apparatus;Cytoplasm;Vesicles		FALSE
mmab	ryr1	mmab_ryr1	0.335133	1.30506e-05	0.000221022	NA	NA	FALSE	NA	FALSE	NA	Mitochondria;Cytoplasm	Golgi apparatus;Cytoplasm;Vesicles	Cytoplasm	TRUE
fundc2	ryr1	fundc2_ryr1	0.468168	3.33979e-10	2.50597e-08	NA	NA	FALSE	NA	FALSE	NA	NA	Golgi apparatus;Cytoplasm;Vesicles		FALSE
cdnf	ryr1	cdnf_ryr1	0.519129	1.46823e-12	2.05486e-10	NA	NA	FALSE	NA	FALSE	NA	NA	Golgi apparatus;Cytoplasm;Vesicles		FALSE
ndufb6	ryr1	ndufb6_ryr1	0.324187	2.57071e-05	0.000387462	NA	NA	FALSE	NA	FALSE	NA	Mitochondria;Cytoplasm	Golgi apparatus;Cytoplasm;Vesicles	Cytoplasm	TRUE
retreg1	ryr1	retreg1_ryr1	0.388449	3.25762e-07	9.83984e-06	NA	NA	FALSE	NA	FALSE	NA	NA	Golgi apparatus;Cytoplasm;Vesicles		FALSE
dcaf11	ryr1	dcaf11_ryr1	0.301266	9.79171e-05	0.00115777	NA	NA	FALSE	NA	FALSE	NA	Nucleoplasm;Nucleus	Golgi apparatus;Cytoplasm;Vesicles		FALSE
dnaaf5	ryr1	dnaaf5_ryr1	0.327786	2.06294e-05	0.000323035	NA	NA	FALSE	NA	FALSE	NA	Nucleoplasm;Nucleus	Golgi apparatus;Cytoplasm;Vesicles		FALSE
them6	ryr1	ryr1_them6	0.321009	3.1147e-05	0.000453863	NA	NA	FALSE	NA	FALSE	NA	Nuclear speckles;Nucleoplasm;Nucleus;Cytosol	Golgi apparatus;Cytoplasm;Vesicles		FALSE
dusp28	ryr1	dusp28_ryr1	0.314731	4.52305e-05	0.000616442	NA	NA	FALSE	NA	FALSE	NA	Nuclear speckles;Nucleoplasm;Nucleus	Golgi apparatus;Cytoplasm;Vesicles		FALSE
naxe	ryr1	naxe_ryr1	0.419333	2.79124e-08	1.19098e-06	NA	NA	FALSE	NA	FALSE	NA	NA	Golgi apparatus;Cytoplasm;Vesicles		FALSE
ube2f	ryr1	ryr1_ube2f	0.344503	7.15413e-06	0.000133956	NA	NA	FALSE	NA	FALSE	NA	Cytosol	Golgi apparatus;Cytoplasm;Vesicles		FALSE
eif2b3	ryr1	eif2b3_ryr1	0.317304	3.88566e-05	0.000544178	NA	NA	FALSE	NA	FALSE	NA	Vesicles;Cytosol	Golgi apparatus;Cytoplasm;Vesicles	Vesicles	TRUE
gtdc1	ryr1	gtdc1_ryr1	0.408519	6.78853e-08	2.56311e-06	NA	NA	FALSE	NA	FALSE	NA	Cytosol	Golgi apparatus;Cytoplasm;Vesicles		FALSE
vmp1	ryr1	ryr1_vmp1	0.361499	2.28616e-06	5.14385e-05	NA	NA	FALSE	NA	FALSE	NA	Endoplasmic reticulum;Cytoplasm	Golgi apparatus;Cytoplasm;Vesicles	Cytoplasm	TRUE
lrrc39	ryr1	lrrc39_ryr1	0.367368	1.51796e-06	3.63959e-05	NA	NA	FALSE	NA	FALSE	NA	NA	Golgi apparatus;Cytoplasm;Vesicles		FALSE
hacd1	ryr1	hacd1_ryr1	0.53657	1.84541e-13	3.2271e-11	NA	NA	FALSE	NA	FALSE	NA	NA	Golgi apparatus;Cytoplasm;Vesicles		FALSE
ptrhd1	ryr1	ptrhd1_ryr1	0.336837	1.17161e-05	0.000202106	NA	NA	FALSE	NA	FALSE	NA	Nucleoplasm;Nucleus	Golgi apparatus;Cytoplasm;Vesicles		FALSE
surf4	ryr1	ryr1_surf4	0.433324	8.42928e-09	4.21849e-07	NA	NA	FALSE	NA	FALSE	NA	NA	Golgi apparatus;Cytoplasm;Vesicles		FALSE
lhpp	ryr1	lhpp_ryr1	0.445398	2.86901e-09	1.64851e-07	NA	NA	FALSE	NA	FALSE	NA	Nuclear speckles;Nucleoplasm;Nucleus;Cytosol	Golgi apparatus;Cytoplasm;Vesicles		FALSE
timmdc1	ryr1	ryr1_timmdc1	0.301889	9.45541e-05	0.00112535	NA	NA	FALSE	NA	FALSE	NA	Mitochondria;Cytoplasm	Golgi apparatus;Cytoplasm;Vesicles	Cytoplasm	TRUE
ppm1l	ryr1	ppm1l_ryr1	0.302084	9.3525e-05	0.00111538	NA	NA	FALSE	NA	FALSE	NA	Cytosol	Golgi apparatus;Cytoplasm;Vesicles		FALSE
scn1b	ryr1	ryr1_scn1b	0.388699	3.19675e-07	9.68147e-06	NA	NA	FALSE	NA	FALSE	NA	NA	Golgi apparatus;Cytoplasm;Vesicles		FALSE
hikeshi	ryr1	hikeshi_ryr1	0.468109	3.35929e-10	2.5189e-08	NA	NA	FALSE	NA	FALSE	NA	NA	Golgi apparatus;Cytoplasm;Vesicles		FALSE
emc9	ryr1	emc9_ryr1	0.466483	3.93751e-10	2.89631e-08	NA	NA	FALSE	NA	FALSE	NA	Golgi apparatus;Cytoplasm	Golgi apparatus;Cytoplasm;Vesicles	Golgi apparatus;Cytoplasm	TRUE
tpmt	ryr1	ryr1_tpmt	0.373927	9.51355e-07	2.45014e-05	NA	NA	FALSE	NA	FALSE	NA	NA	Golgi apparatus;Cytoplasm;Vesicles		FALSE
htt	ryr1	htt_ryr1	0.398346	1.52277e-07	5.1314e-06	NA	NA	FALSE	NA	FALSE	185	Nucleoplasm;Nucleus	Golgi apparatus;Cytoplasm;Vesicles		FALSE
popdc2	ryr1	popdc2_ryr1	0.37114	1.16172e-06	2.90268e-05	NA	NA	FALSE	NA	FALSE	239	NA	Golgi apparatus;Cytoplasm;Vesicles		FALSE
tmem11	ryr1	ryr1_tmem11	0.426907	1.46965e-08	6.83815e-07	NA	NA	FALSE	NA	FALSE	NA	Mitochondria;Cytoplasm	Golgi apparatus;Cytoplasm;Vesicles	Cytoplasm	TRUE
ube2d1	ryr1	ryr1_ube2d1	0.436041	6.63823e-09	3.42687e-07	NA	NA	FALSE	NA	FALSE	NA	Cytosol;Plasma membrane	Golgi apparatus;Cytoplasm;Vesicles		FALSE
eef1aknmt	ryr1	eef1aknmt_ryr1	0.316999	3.9566e-05	0.00055232	NA	NA	FALSE	NA	FALSE	NA	NA	Golgi apparatus;Cytoplasm;Vesicles		FALSE
mkrn2	ryr1	mkrn2_ryr1	0.311947	5.32239e-05	0.000704156	NA	NA	FALSE	NA	FALSE	NA	Nucleoplasm;Nucleus;Cytosol	Golgi apparatus;Cytoplasm;Vesicles		FALSE
fitm1	ryr1	fitm1_ryr1	0.546282	5.5169e-14	1.09434e-11	NA	NA	FALSE	NA	FALSE	NA	NA	Golgi apparatus;Cytoplasm;Vesicles		FALSE
fntb	ryr1	fntb_ryr1	0.341697	8.58286e-06	0.000155959	NA	NA	FALSE	NA	FALSE	NA	Centrosome	Golgi apparatus;Cytoplasm;Vesicles		FALSE
jagn1	ryr1	jagn1_ryr1	0.303053	8.8564e-05	0.00106702	NA	NA	FALSE	NA	FALSE	NA	Vesicles	Golgi apparatus;Cytoplasm;Vesicles	Vesicles	TRUE
agpat1	ryr1	agpat1_ryr1	0.320198	3.27004e-05	0.000472412	NA	NA	FALSE	NA	FALSE	NA	Endoplasmic reticulum;Cytoplasm	Golgi apparatus;Cytoplasm;Vesicles	Cytoplasm	TRUE
rfk	ryr1	rfk_ryr1	0.344688	7.06869e-06	0.000132627	NA	NA	FALSE	NA	FALSE	NA	Golgi apparatus;Cytoplasm	Golgi apparatus;Cytoplasm;Vesicles	Golgi apparatus;Cytoplasm	TRUE
cacng1	ryr1	cacng1_ryr1	0.303326	8.72139e-05	0.0010537	NA	NA	FALSE	NA	FALSE	806	NA	Golgi apparatus;Cytoplasm;Vesicles		FALSE
rnf14	ryr1	rnf14_ryr1	0.387075	3.61323e-07	1.07517e-05	NA	NA	FALSE	NA	FALSE	NA	Cytosol	Golgi apparatus;Cytoplasm;Vesicles		FALSE
fn3krp	ryr1	fn3krp_ryr1	0.313182	4.9527e-05	0.000664029	NA	NA	FALSE	NA	FALSE	NA	Nucleoplasm;Nucleus	Golgi apparatus;Cytoplasm;Vesicles		FALSE
cacng6	ryr1	cacng6_ryr1	0.346467	6.29157e-06	0.000120331	NA	NA	FALSE	NA	FALSE	720	Nucleoli;Nucleus (Fibrillar center)	Golgi apparatus;Cytoplasm;Vesicles		FALSE
senp8	ryr1	ryr1_senp8	0.30429	8.25902e-05	0.00100797	NA	NA	FALSE	NA	FALSE	NA	Nucleoplasm;Nucleus;Vesicles	Golgi apparatus;Cytoplasm;Vesicles	Vesicles	TRUE
nudt15	ryr1	nudt15_ryr1	0.305869	7.55117e-05	0.000936845	NA	NA	FALSE	NA	FALSE	NA	Nucleoplasm;Nucleus	Golgi apparatus;Cytoplasm;Vesicles		FALSE
naa20	ryr1	naa20_ryr1	0.331636	1.62523e-05	0.00026523	NA	NA	FALSE	NA	FALSE	NA	Cytosol	Golgi apparatus;Cytoplasm;Vesicles		FALSE
ak6	ryr1	ak6_ryr1	0.322128	2.9119e-05	0.000429386	NA	NA	FALSE	NA	FALSE	NA	Nucleoplasm;Nucleus	Golgi apparatus;Cytoplasm;Vesicles		FALSE
mif	ryr1	mif_ryr1	0.35079	4.72751e-06	9.47317e-05	NA	NA	FALSE	NA	FALSE	NA	Cytosol	Golgi apparatus;Cytoplasm;Vesicles		FALSE
tspan8	ryr1	ryr1_tspan8	0.362217	2.17528e-06	4.93212e-05	NA	NA	FALSE	NA	FALSE	NA	Nucleoplasm;Nucleus	Golgi apparatus;Cytoplasm;Vesicles		FALSE
uqcr11	ryr1	ryr1_uqcr11	0.373089	1.0104e-06	2.57861e-05	NA	NA	FALSE	NA	FALSE	NA	NA	Golgi apparatus;Cytoplasm;Vesicles		FALSE
selenow	ryr1	ryr1_selenow	0.368844	1.36769e-06	3.33263e-05	NA	NA	FALSE	NA	FALSE	NA	NA	Golgi apparatus;Cytoplasm;Vesicles		FALSE
fundc1	ryr1	fundc1_ryr1	0.411863	5.17445e-08	2.02835e-06	NA	NA	FALSE	NA	FALSE	NA	NA	Golgi apparatus;Cytoplasm;Vesicles		FALSE
hint3	ryr1	hint3_ryr1	0.316978	3.96138e-05	0.000552873	NA	NA	FALSE	NA	FALSE	NA	Nucleoli;Nucleus;Cytosol;Mitochondria;Cytoplasm	Golgi apparatus;Cytoplasm;Vesicles	Cytoplasm	TRUE
mrps2	ryr1	mrps2_ryr1	0.343045	7.8659e-06	0.000144985	NA	NA	FALSE	NA	FALSE	NA	Mitochondria;Cytoplasm	Golgi apparatus;Cytoplasm;Vesicles	Cytoplasm	TRUE
saraf	ryr1	ryr1_saraf	0.390126	2.86883e-07	8.82542e-06	NA	NA	FALSE	NA	FALSE	156	Endoplasmic reticulum;Cytoplasm	Golgi apparatus;Cytoplasm;Vesicles	Cytoplasm	TRUE
scn4b	ryr1	ryr1_scn4b	0.33546	1.27836e-05	0.000217305	NA	NA	FALSE	NA	FALSE	NA	NA	Golgi apparatus;Cytoplasm;Vesicles		FALSE
micos10	ryr1	micos10_ryr1	0.374951	8.83583e-07	2.30162e-05	NA	NA	FALSE	NA	FALSE	NA	NA	Golgi apparatus;Cytoplasm;Vesicles		FALSE
rock1	ryr1	rock1_ryr1	0.301861	9.47023e-05	0.00112679	NA	NA	FALSE	NA	FALSE	NA	NA	Golgi apparatus;Cytoplasm;Vesicles		FALSE
dpcd	ryr1	dpcd_ryr1	0.331225	1.66736e-05	0.000270896	NA	NA	FALSE	NA	FALSE	NA	Nuclear speckles;Nucleoplasm;Nucleus	Golgi apparatus;Cytoplasm;Vesicles		FALSE
ryr1	plec	plec_ryr1	0.489267	3.93398e-11	3.80185e-09	NA	NA	FALSE	NA	FALSE	265	Golgi apparatus;Cytoplasm;Vesicles	Intermediate filaments;Cytosol		FALSE
obscn	plec	obscn_plec	0.333424	1.45327e-05	0.000241715	NA	NA	FALSE	NA	FALSE	490	Cytosol;Plasma membrane	Intermediate filaments;Cytosol	Cytosol	TRUE
obscn	plec	obscn_plec	0.333424	1.45327e-05	0.000241715	NA	NA	FALSE	NA	FALSE	490	Cytosol;Plasma membrane	Intermediate filaments;Cytosol	Cytosol	TRUE
dmd	plec	dmd_plec	0.308647	6.44152e-05	0.000822918	NA	NA	FALSE	NA	FALSE	368	NA	Intermediate filaments;Cytosol		FALSE
sptb	plec	plec_sptb	0.320876	3.13968e-05	0.000456831	NA	NA	FALSE	NA	FALSE	NA	Cytosol	Intermediate filaments;Cytosol	Cytosol	TRUE
actn3	plec	actn3_plec	0.439927	4.69991e-09	2.53653e-07	NA	NA	FALSE	NA	FALSE	161	NA	Intermediate filaments;Cytosol		FALSE
agl	plec	agl_plec	0.481568	8.73289e-11	7.68292e-09	NA	NA	FALSE	NA	FALSE	NA	Nucleoplasm;Nucleus	Intermediate filaments;Cytosol		FALSE
pygm	plec	plec_pygm	0.515461	2.23761e-12	2.98884e-10	NA	NA	FALSE	NA	FALSE	NA	NA	Intermediate filaments;Cytosol		FALSE
actn2	plec	actn2_plec	0.353749	3.87778e-06	8.02238e-05	NA	NA	FALSE	NA	FALSE	167	NA	Intermediate filaments;Cytosol		FALSE
acta1	plec	acta1_plec	0.419959	2.64864e-08	1.13826e-06	NA	NA	FALSE	NA	FALSE	389	NA	Intermediate filaments;Cytosol		FALSE
lama2	plec	lama2_plec	0.304711	8.06419e-05	0.000988442	NA	NA	FALSE	NA	FALSE	253	NA	Intermediate filaments;Cytosol		FALSE
aldoa	plec	aldoa_plec	0.380301	5.98147e-07	1.65184e-05	NA	NA	FALSE	NA	FALSE	NA	Cytosol	Intermediate filaments;Cytosol	Cytosol	TRUE
atp5b	plec	atp5b_plec	0.595303	6.57038e-17	2.51882e-14	NA	NA	FALSE	NA	FALSE	NA	Mitochondria;Cytoplasm	Intermediate filaments;Cytosol		FALSE
pgm2	plec	pgm2_plec	0.448043	2.25282e-09	1.33436e-07	NA	NA	FALSE	NA	FALSE	NA	Intermediate filaments	Intermediate filaments;Cytosol	Intermediate filaments	TRUE
sdha	plec	plec_sdha	0.508128	5.11761e-12	6.2415e-10	NA	NA	FALSE	NA	FALSE	NA	Mitochondria;Cytoplasm	Intermediate filaments;Cytosol		FALSE
atp5a1	plec	atp5a1_plec	0.392374	2.41663e-07	7.62507e-06	NA	NA	FALSE	NA	FALSE	NA	Mitochondria;Cytoplasm	Intermediate filaments;Cytosol		FALSE
lamb2	plec	lamb2_plec	0.399765	1.36265e-07	4.66245e-06	NA	NA	FALSE	NA	FALSE	NA	Vesicles	Intermediate filaments;Cytosol		FALSE
immt	plec	immt_plec	0.344092	7.34867e-06	0.000137001	NA	NA	FALSE	NA	FALSE	NA	Mitochondria;Cytoplasm	Intermediate filaments;Cytosol		FALSE
dst	plec	dst_plec	0.341487	8.70015e-06	0.00015774	NA	NA	FALSE	NA	FALSE	933	Nucleus;Microtubules	Intermediate filaments;Cytosol		FALSE
atp1a1	plec	atp1a1_plec	0.39245	2.4026e-07	7.58691e-06	NA	NA	FALSE	NA	FALSE	NA	NA	Intermediate filaments;Cytosol		FALSE
hk2	plec	hk2_plec	0.314938	4.46821e-05	0.000610333	NA	NA	FALSE	NA	FALSE	NA	NA	Intermediate filaments;Cytosol		FALSE
ndufs1	plec	ndufs1_plec	0.405063	8.95946e-08	3.25361e-06	NA	NA	FALSE	NA	FALSE	NA	Mitochondria;Cytoplasm	Intermediate filaments;Cytosol		FALSE
lrpprc	plec	lrpprc_plec	0.378956	6.60213e-07	1.79666e-05	NA	NA	FALSE	NA	FALSE	NA	Mitochondria;Cytoplasm	Intermediate filaments;Cytosol		FALSE
dnm1l	plec	dnm1l_plec	0.540002	1.20972e-13	2.21229e-11	NA	NA	FALSE	NA	FALSE	NA	Cytosol	Intermediate filaments;Cytosol	Cytosol	TRUE
phkb	plec	phkb_plec	0.342593	8.09985e-06	0.000148583	NA	NA	FALSE	NA	FALSE	NA	Golgi apparatus;Cytoplasm	Intermediate filaments;Cytosol		FALSE
myot	plec	myot_plec	0.424248	1.84414e-08	8.32189e-07	NA	NA	FALSE	NA	FALSE	566	NA	Intermediate filaments;Cytosol		FALSE
ckmt2	plec	ckmt2_plec	0.420795	2.46906e-08	1.07091e-06	NA	NA	FALSE	NA	FALSE	NA	NA	Intermediate filaments;Cytosol		FALSE
des	plec	des_plec	0.573382	1.53213e-15	4.34789e-13	NA	NA	FALSE	NA	FALSE	396	Intermediate filaments	Intermediate filaments;Cytosol	Intermediate filaments	TRUE
oxct1	plec	oxct1_plec	0.440681	4.39314e-09	2.39255e-07	NA	NA	FALSE	NA	FALSE	NA	Mitochondria;Cytoplasm	Intermediate filaments;Cytosol		FALSE
oplah	plec	oplah_plec	0.484916	6.1891e-11	5.67373e-09	NA	NA	FALSE	NA	FALSE	NA	Nucleoli;Nucleus (Fibrillar center)	Intermediate filaments;Cytosol		FALSE
adssl1	plec	adssl1_plec	0.31206	5.2874e-05	0.000700352	NA	NA	FALSE	NA	FALSE	NA	NA	Intermediate filaments;Cytosol		FALSE
cacna1s	plec	cacna1s_plec	0.36249	2.13459e-06	4.85419e-05	NA	NA	FALSE	NA	FALSE	NA	NA	Intermediate filaments;Cytosol		FALSE
gys1	plec	gys1_plec	0.483794	6.94847e-11	6.28364e-09	NA	NA	FALSE	NA	FALSE	170	Microtubules;Cytosol	Intermediate filaments;Cytosol	Cytosol	TRUE
myoz1	plec	myoz1_plec	0.383846	4.6013e-07	1.32171e-05	NA	NA	FALSE	NA	FALSE	NA	NA	Intermediate filaments;Cytosol		FALSE
ldha	plec	ldha_plec	0.504731	7.4577e-12	8.72223e-10	NA	NA	FALSE	NA	FALSE	NA	Cytosol	Intermediate filaments;Cytosol	Cytosol	TRUE
lonp1	plec	lonp1_plec	0.374786	8.94164e-07	2.32508e-05	NA	NA	FALSE	NA	FALSE	NA	Mitochondria;Cytoplasm	Intermediate filaments;Cytosol		FALSE
npepps	plec	npepps_plec	0.512549	3.1151e-12	4.01439e-10	NA	NA	FALSE	NA	FALSE	NA	Cytosol	Intermediate filaments;Cytosol	Cytosol	TRUE
vdac1	plec	plec_vdac1	0.517638	1.74362e-12	2.39315e-10	NA	NA	FALSE	NA	FALSE	269	Cytosol	Intermediate filaments;Cytosol	Cytosol	TRUE
dld	plec	dld_plec	0.421495	2.3279e-08	1.01783e-06	NA	NA	FALSE	NA	FALSE	NA	Mitochondria;Cytoplasm	Intermediate filaments;Cytosol		FALSE
got2	plec	got2_plec	0.489437	3.86453e-11	3.74194e-09	NA	NA	FALSE	NA	FALSE	NA	NA	Intermediate filaments;Cytosol		FALSE
gart	plec	gart_plec	0.438468	5.35335e-09	2.84036e-07	NA	NA	FALSE	NA	FALSE	NA	Nucleoplasm;Nucleus;Cytosol;Mitochondria;Cytoplasm	Intermediate filaments;Cytosol	Cytosol	TRUE
sucla2	plec	plec_sucla2	0.433444	8.34117e-09	4.18021e-07	NA	NA	FALSE	NA	FALSE	NA	Mitochondria;Cytoplasm	Intermediate filaments;Cytosol		FALSE
ddb1	plec	ddb1_plec	0.406168	8.20182e-08	3.0167e-06	NA	NA	FALSE	NA	FALSE	NA	Nucleoplasm;Nucleus	Intermediate filaments;Cytosol		FALSE
mdh2	plec	mdh2_plec	0.500538	1.18036e-11	1.31029e-09	NA	NA	FALSE	NA	FALSE	NA	Mitochondria;Cytoplasm	Intermediate filaments;Cytosol		FALSE
capn1	plec	capn1_plec	0.456742	1.00231e-09	6.57398e-08	NA	NA	FALSE	NA	FALSE	159	Cytosol	Intermediate filaments;Cytosol	Cytosol	TRUE
prep	plec	plec_prep	0.444511	3.10991e-09	1.76931e-07	NA	NA	FALSE	NA	FALSE	NA	Cytosol	Intermediate filaments;Cytosol	Cytosol	TRUE
ndufs2	plec	ndufs2_plec	0.508777	4.76003e-12	5.85274e-10	NA	NA	FALSE	NA	FALSE	NA	Mitochondria;Cytoplasm	Intermediate filaments;Cytosol		FALSE
ppp2r1a	plec	plec_ppp2r1a	0.352776	4.13978e-06	8.47539e-05	NA	NA	FALSE	NA	FALSE	NA	Cytosol	Intermediate filaments;Cytosol	Cytosol	TRUE
adsl	plec	adsl_plec	0.549606	3.61617e-14	7.47788e-12	NA	NA	FALSE	NA	FALSE	NA	Cytosol	Intermediate filaments;Cytosol	Cytosol	TRUE
idh3b	plec	idh3b_plec	0.343063	7.85658e-06	0.000144842	NA	NA	FALSE	NA	FALSE	NA	Mitochondria;Cytoplasm	Intermediate filaments;Cytosol		FALSE
dlat	plec	dlat_plec	0.498317	1.50168e-11	1.621e-09	NA	NA	FALSE	NA	FALSE	NA	Mitochondria;Cytoplasm	Intermediate filaments;Cytosol		FALSE
cs	plec	cs_plec	0.392288	2.43263e-07	7.66823e-06	NA	NA	FALSE	NA	FALSE	NA	Mitochondria;Cytoplasm	Intermediate filaments;Cytosol		FALSE
ank1	plec	ank1_plec	0.335859	1.24651e-05	0.000212798	NA	NA	FALSE	NA	FALSE	264	NA	Intermediate filaments;Cytosol		FALSE
smyd1	plec	plec_smyd1	0.376501	7.89732e-07	2.09252e-05	NA	NA	FALSE	NA	FALSE	167	NA	Intermediate filaments;Cytosol		FALSE
uqcrc1	plec	plec_uqcrc1	0.531456	3.43191e-13	5.61976e-11	NA	NA	FALSE	NA	FALSE	409	Mitochondria;Cytoplasm	Intermediate filaments;Cytosol		FALSE
nampt	plec	nampt_plec	0.374539	9.10277e-07	2.36046e-05	NA	NA	FALSE	NA	FALSE	NA	Nuclear speckles;Nucleoplasm;Nucleus	Intermediate filaments;Cytosol		FALSE
ndufa9	plec	ndufa9_plec	0.64353	2.57617e-20	1.99437e-17	NA	NA	FALSE	NA	FALSE	NA	Nucleoplasm;Nucleus;Mitochondria;Cytoplasm	Intermediate filaments;Cytosol		FALSE
idh3g	plec	idh3g_plec	0.444243	3.18645e-09	1.80768e-07	NA	NA	FALSE	NA	FALSE	NA	Mitochondria;Cytoplasm	Intermediate filaments;Cytosol		FALSE
uqcrc2	plec	plec_uqcrc2	0.524493	7.85675e-13	1.17646e-10	NA	NA	FALSE	NA	FALSE	NA	Mitochondria;Cytoplasm	Intermediate filaments;Cytosol		FALSE
coq8a	plec	coq8a_plec	0.621738	1.0552e-18	5.91597e-16	NA	NA	FALSE	NA	FALSE	NA	NA	Intermediate filaments;Cytosol		FALSE
jph2	plec	jph2_plec	0.484145	6.70187e-11	6.08587e-09	NA	NA	FALSE	NA	FALSE	NA	NA	Intermediate filaments;Cytosol		FALSE
slc25a4	plec	plec_slc25a4	0.657235	2.13049e-21	2.02383e-18	NA	NA	FALSE	NA	FALSE	494	Mitochondria;Cytoplasm	Intermediate filaments;Cytosol		FALSE
pdpr	plec	pdpr_plec	0.635485	1.0499e-19	7.19821e-17	NA	NA	FALSE	NA	FALSE	NA	Mitochondria;Cytoplasm	Intermediate filaments;Cytosol		FALSE
usp9x	plec	plec_usp9x	0.366153	1.65337e-06	3.9132e-05	NA	NA	FALSE	NA	FALSE	NA	Vesicles	Intermediate filaments;Cytosol		FALSE
pdha1	plec	pdha1_plec	0.502334	9.70428e-12	1.10193e-09	NA	NA	FALSE	NA	FALSE	NA	Mitochondria;Cytoplasm	Intermediate filaments;Cytosol		FALSE
cpt1b	plec	cpt1b_plec	0.457532	9.30155e-10	6.15834e-08	NA	NA	FALSE	NA	FALSE	NA	NA	Intermediate filaments;Cytosol		FALSE
idh2	plec	idh2_plec	0.301886	9.45713e-05	0.00112552	NA	NA	FALSE	NA	FALSE	NA	Mitochondria;Cytoplasm	Intermediate filaments;Cytosol		FALSE
cul5	plec	cul5_plec	0.306755	7.17896e-05	0.000899012	NA	NA	FALSE	NA	FALSE	NA	Golgi apparatus;Cytoplasm;Cytosol	Intermediate filaments;Cytosol	Cytosol	TRUE
got1	plec	got1_plec	0.534779	2.29603e-13	3.92653e-11	NA	NA	FALSE	NA	FALSE	NA	Nucleoplasm;Nucleus	Intermediate filaments;Cytosol		FALSE
mb	plec	mb_plec	0.487213	4.87629e-11	4.59738e-09	NA	NA	FALSE	NA	FALSE	NA	NA	Intermediate filaments;Cytosol		FALSE
ndufv1	plec	ndufv1_plec	0.548328	4.25611e-14	8.66291e-12	NA	NA	FALSE	NA	FALSE	265	Mitochondria;Cytoplasm	Intermediate filaments;Cytosol		FALSE
fhod1	plec	fhod1_plec	0.385418	4.09175e-07	1.19579e-05	NA	NA	FALSE	NA	FALSE	181	Cytosol	Intermediate filaments;Cytosol	Cytosol	TRUE
cilp2	plec	cilp2_plec	0.410934	5.58146e-08	2.16519e-06	NA	NA	FALSE	NA	FALSE	NA	NA	Intermediate filaments;Cytosol		FALSE
snta1	plec	plec_snta1	0.339809	9.69175e-06	0.000172608	NA	NA	FALSE	NA	FALSE	261	NA	Intermediate filaments;Cytosol		FALSE
dtna	plec	dtna_plec	0.309391	6.17151e-05	0.000794707	NA	NA	FALSE	NA	FALSE	433	Nucleoplasm;Nucleus;Intermediate filaments;Cell Junctions	Intermediate filaments;Cytosol	Intermediate filaments	TRUE
pdlim5	plec	pdlim5_plec	0.323117	2.74296e-05	0.000408755	NA	NA	FALSE	NA	FALSE	201	Nucleoplasm;Nucleus;Focal Adhesions;Plasma membrane	Intermediate filaments;Cytosol		FALSE
pdlim5	plec	pdlim5_plec	0.323117	2.74296e-05	0.000408755	NA	NA	FALSE	NA	FALSE	201	Nucleoplasm;Nucleus;Focal Adhesions;Plasma membrane	Intermediate filaments;Cytosol		FALSE
park7	plec	park7_plec	0.308229	6.59806e-05	0.000839171	NA	NA	FALSE	NA	FALSE	161	Nucleus;Cytosol	Intermediate filaments;Cytosol	Cytosol	TRUE
mpi	plec	mpi_plec	0.476072	1.52457e-10	1.25724e-08	NA	NA	FALSE	NA	FALSE	NA	Cytosol	Intermediate filaments;Cytosol	Cytosol	TRUE
txnrd1	plec	plec_txnrd1	0.351989	4.36385e-06	8.85786e-05	NA	NA	FALSE	NA	FALSE	NA	Nucleus	Intermediate filaments;Cytosol		FALSE
samm50	plec	plec_samm50	0.502951	9.07044e-12	1.03746e-09	NA	NA	FALSE	NA	FALSE	223	Mitochondria;Cytoplasm	Intermediate filaments;Cytosol		FALSE
hsd17b10	plec	hsd17b10_plec	0.367332	1.52182e-06	3.6476e-05	NA	NA	FALSE	NA	FALSE	258	NA	Intermediate filaments;Cytosol		FALSE
cyc1	plec	cyc1_plec	0.467309	3.6327e-10	2.69897e-08	NA	NA	FALSE	NA	FALSE	NA	Mitochondria;Cytoplasm	Intermediate filaments;Cytosol		FALSE
phkg1	plec	phkg1_plec	0.342409	8.19678e-06	0.00015007	NA	NA	FALSE	NA	FALSE	NA	NA	Intermediate filaments;Cytosol		FALSE
afg3l2	plec	afg3l2_plec	0.334651	1.34536e-05	0.00022666	NA	NA	FALSE	NA	FALSE	NA	Mitochondria;Cytoplasm	Intermediate filaments;Cytosol		FALSE
eno2	plec	eno2_plec	0.314037	4.71099e-05	0.000637321	NA	NA	FALSE	NA	FALSE	NA	Cytosol;Plasma membrane	Intermediate filaments;Cytosol	Cytosol	TRUE
stac3	plec	plec_stac3	0.493127	2.61784e-11	2.65152e-09	NA	NA	FALSE	NA	FALSE	NA	Nucleoplasm;Nucleus	Intermediate filaments;Cytosol		FALSE
uqcrfs1	plec	plec_uqcrfs1	0.421586	2.31006e-08	1.01115e-06	NA	NA	FALSE	NA	FALSE	NA	Mitochondria;Cytoplasm	Intermediate filaments;Cytosol		FALSE
ndrg2	plec	ndrg2_plec	0.397718	1.59921e-07	5.35212e-06	NA	NA	FALSE	NA	FALSE	NA	Microtubule organizing center;Cytoskeleton	Intermediate filaments;Cytosol		FALSE
gstm2	plec	gstm2_plec	0.316571	4.05812e-05	0.00056393	NA	NA	FALSE	NA	FALSE	NA	Cytosol	Intermediate filaments;Cytosol	Cytosol	TRUE
prkar2a	plec	plec_prkar2a	0.453254	1.39069e-09	8.75626e-08	NA	NA	FALSE	NA	FALSE	NA	Golgi apparatus;Cytoplasm;Vesicles;Microtubule organizing center;Cytoskeleton	Intermediate filaments;Cytosol		FALSE
ldhb	plec	ldhb_plec	0.500405	1.19755e-11	1.32706e-09	NA	NA	FALSE	NA	FALSE	NA	Cytosol	Intermediate filaments;Cytosol	Cytosol	TRUE
phb	plec	phb_plec	0.340066	9.53305e-06	0.00017026	NA	NA	FALSE	NA	FALSE	377	Mitochondria;Cytoplasm	Intermediate filaments;Cytosol		FALSE
abcb7	plec	abcb7_plec	0.597023	5.07912e-17	1.992e-14	NA	NA	FALSE	NA	FALSE	NA	Mitochondria;Cytoplasm	Intermediate filaments;Cytosol		FALSE
prkaa2	plec	plec_prkaa2	0.371078	1.16686e-06	2.91357e-05	NA	NA	FALSE	NA	FALSE	NA	Nuclear speckles;Nucleoplasm;Nucleus	Intermediate filaments;Cytosol		FALSE
gatd3a	plec	gatd3a_plec	0.302361	9.20833e-05	0.00110135	NA	NA	FALSE	NA	FALSE	NA	NA	Intermediate filaments;Cytosol		FALSE
me3	plec	me3_plec	0.429311	1.19497e-08	5.71462e-07	NA	NA	FALSE	NA	FALSE	NA	NA	Intermediate filaments;Cytosol		FALSE
scrn3	plec	plec_scrn3	0.375157	8.70536e-07	2.27292e-05	NA	NA	FALSE	NA	FALSE	NA	Vesicles;Cytosol	Intermediate filaments;Cytosol	Cytosol	TRUE
aldh7a1	plec	aldh7a1_plec	0.312994	5.00747e-05	0.000670013	NA	NA	FALSE	NA	FALSE	195	Mitochondria;Cytoplasm	Intermediate filaments;Cytosol		FALSE
ppp1r7	plec	plec_ppp1r7	0.356848	3.14444e-06	6.72785e-05	NA	NA	FALSE	NA	FALSE	NA	Nucleoli;Nucleus	Intermediate filaments;Cytosol		FALSE
atp5pb	plec	atp5pb_plec	0.356958	3.12092e-06	6.68508e-05	NA	NA	FALSE	NA	FALSE	NA	NA	Intermediate filaments;Cytosol		FALSE
ube3a	plec	plec_ube3a	0.32064	3.18462e-05	0.000462266	NA	NA	FALSE	NA	FALSE	NA	Nucleoplasm;Nucleus	Intermediate filaments;Cytosol		FALSE
dhrs7c	plec	dhrs7c_plec	0.488993	4.04851e-11	3.89946e-09	NA	NA	FALSE	NA	FALSE	NA	NA	Intermediate filaments;Cytosol		FALSE
cycs	plec	cycs_plec	0.469357	2.97192e-10	2.26284e-08	NA	NA	FALSE	NA	FALSE	321	Mitochondria;Cytoplasm	Intermediate filaments;Cytosol		FALSE
pcmt1	plec	pcmt1_plec	0.428947	1.23316e-08	5.8735e-07	NA	NA	FALSE	NA	FALSE	NA	Cytosol	Intermediate filaments;Cytosol	Cytosol	TRUE
phb2	plec	phb2_plec	0.463297	5.36217e-10	3.79871e-08	NA	NA	FALSE	NA	FALSE	NA	Mitochondria;Cytoplasm	Intermediate filaments;Cytosol		FALSE
pdhx	plec	pdhx_plec	0.467142	3.69259e-10	2.73817e-08	NA	NA	FALSE	NA	FALSE	NA	Nucleus;Plasma membrane	Intermediate filaments;Cytosol		FALSE
eci1	plec	eci1_plec	0.334505	1.3578e-05	0.000228405	NA	NA	FALSE	NA	FALSE	NA	NA	Intermediate filaments;Cytosol		FALSE
pdk2	plec	pdk2_plec	0.477458	1.32589e-10	1.11125e-08	NA	NA	FALSE	NA	FALSE	NA	Nucleoplasm;Nucleus;Mitochondria;Cytoplasm	Intermediate filaments;Cytosol		FALSE
ndufv2	plec	ndufv2_plec	0.333903	1.41023e-05	0.000235718	NA	NA	FALSE	NA	FALSE	NA	Mitochondria;Cytoplasm	Intermediate filaments;Cytosol		FALSE
atp5o	plec	atp5o_plec	0.303683	8.54728e-05	0.00103656	NA	NA	FALSE	NA	FALSE	NA	Mitochondria;Cytoplasm	Intermediate filaments;Cytosol		FALSE
slc25a11	plec	plec_slc25a11	0.572564	1.71564e-15	4.81541e-13	NA	NA	FALSE	NA	FALSE	NA	NA	Intermediate filaments;Cytosol		FALSE
cox4i1	plec	cox4i1_plec	0.415323	3.89515e-08	1.58842e-06	NA	NA	FALSE	NA	FALSE	NA	Mitochondria;Cytoplasm	Intermediate filaments;Cytosol		FALSE
mdh1	plec	mdh1_plec	0.641978	3.38893e-20	2.55901e-17	NA	NA	FALSE	NA	FALSE	NA	Centrosome;Cytosol	Intermediate filaments;Cytosol	Cytosol	TRUE
dlst	plec	dlst_plec	0.455914	1.08369e-09	7.0381e-08	NA	NA	FALSE	NA	FALSE	NA	NA	Intermediate filaments;Cytosol		FALSE
suox	plec	plec_suox	0.383252	4.80905e-07	1.37219e-05	NA	NA	FALSE	NA	FALSE	NA	NA	Intermediate filaments;Cytosol		FALSE
ppp5c	plec	plec_ppp5c	0.329799	1.82179e-05	0.000291457	NA	NA	FALSE	NA	FALSE	NA	Vesicles;Cytosol	Intermediate filaments;Cytosol	Cytosol	TRUE
cox2	plec	cox2_plec	0.482107	8.26406e-11	7.31977e-09	NA	NA	FALSE	NA	FALSE	NA	NA	Intermediate filaments;Cytosol		FALSE
cox2	plec	cox2_plec	0.482107	8.26406e-11	7.31977e-09	NA	NA	FALSE	NA	FALSE	NA	NA	Intermediate filaments;Cytosol		FALSE
vwa1	plec	plec_vwa1	0.343411	7.6813e-06	0.000142136	NA	NA	FALSE	NA	FALSE	NA	NA	Intermediate filaments;Cytosol		FALSE
cops3	plec	cops3_plec	0.321345	3.05252e-05	0.000446386	NA	NA	FALSE	NA	FALSE	169	Nucleus	Intermediate filaments;Cytosol		FALSE
l2hgdh	plec	l2hgdh_plec	0.576	1.06486e-15	3.12814e-13	NA	NA	FALSE	NA	FALSE	NA	Mitochondria;Cytoplasm	Intermediate filaments;Cytosol		FALSE
aldoc	plec	aldoc_plec	0.328348	1.99278e-05	0.000313888	NA	NA	FALSE	NA	FALSE	NA	Nucleus;Nucleoli;Nucleus (Fibrillar center)	Intermediate filaments;Cytosol		FALSE
dnaja3	plec	dnaja3_plec	0.536154	1.94172e-13	3.37776e-11	NA	NA	FALSE	NA	FALSE	NA	Mitochondria;Cytoplasm	Intermediate filaments;Cytosol		FALSE
pdk4	plec	pdk4_plec	0.434092	7.88104e-09	3.97781e-07	NA	NA	FALSE	NA	FALSE	NA	NA	Intermediate filaments;Cytosol		FALSE
gps1	plec	gps1_plec	0.447889	2.28482e-09	1.35068e-07	NA	NA	FALSE	NA	FALSE	NA	NA	Intermediate filaments;Cytosol		FALSE
ppp3cb	plec	plec_ppp3cb	0.348106	5.64836e-06	0.000109933	NA	NA	FALSE	NA	FALSE	NA	Mitochondria;Cytoplasm	Intermediate filaments;Cytosol		FALSE
rabggta	plec	plec_rabggta	0.463515	5.25043e-10	3.72888e-08	NA	NA	FALSE	NA	FALSE	NA	Nucleoplasm;Nucleus	Intermediate filaments;Cytosol		FALSE
prdx3	plec	plec_prdx3	0.558134	1.19777e-14	2.77237e-12	NA	NA	FALSE	NA	FALSE	NA	NA	Intermediate filaments;Cytosol		FALSE
macrod1	plec	macrod1_plec	0.438905	5.1488e-09	2.74551e-07	NA	NA	FALSE	NA	FALSE	NA	Nucleoplasm;Nucleus	Intermediate filaments;Cytosol		FALSE
mtch2	plec	mtch2_plec	0.469658	2.88541e-10	2.20487e-08	NA	NA	FALSE	NA	FALSE	NA	Mitochondria;Cytoplasm	Intermediate filaments;Cytosol		FALSE
map2k4	plec	map2k4_plec	0.343364	7.70445e-06	0.0001425	NA	NA	FALSE	NA	FALSE	NA	Nucleoplasm;Nucleus	Intermediate filaments;Cytosol		FALSE
maob	plec	maob_plec	0.383467	4.73268e-07	1.35376e-05	NA	NA	FALSE	NA	FALSE	NA	Nucleoli;Nucleus	Intermediate filaments;Cytosol		FALSE
rtca	plec	plec_rtca	0.371325	1.14651e-06	2.87054e-05	NA	NA	FALSE	NA	FALSE	NA	Nucleus	Intermediate filaments;Cytosol		FALSE
psmd5	plec	plec_psmd5	0.360367	2.47165e-06	5.49268e-05	NA	NA	FALSE	NA	FALSE	NA	Cytosol	Intermediate filaments;Cytosol	Cytosol	TRUE
dhdh	plec	dhdh_plec	0.332474	1.54237e-05	0.000253966	NA	NA	FALSE	NA	FALSE	NA	Nucleoplasm;Nucleus;Actin filaments;Cytoskeleton	Intermediate filaments;Cytosol		FALSE
tbc1d1	plec	plec_tbc1d1	0.356813	3.15193e-06	6.74129e-05	NA	NA	FALSE	NA	FALSE	NA	Nucleoli;Nucleus	Intermediate filaments;Cytosol		FALSE
kyat3	plec	kyat3_plec	0.469716	2.86889e-10	2.1939e-08	NA	NA	FALSE	NA	FALSE	NA	NA	Intermediate filaments;Cytosol		FALSE
nudt2	plec	nudt2_plec	0.365905	1.68235e-06	3.97078e-05	NA	NA	FALSE	NA	FALSE	220	Nucleoplasm;Nucleus	Intermediate filaments;Cytosol		FALSE
dnajc11	plec	dnajc11_plec	0.35735	3.03882e-06	6.5361e-05	NA	NA	FALSE	NA	FALSE	NA	Cytosol	Intermediate filaments;Cytosol	Cytosol	TRUE
ppm1b	plec	plec_ppm1b	0.317202	3.90918e-05	0.000546885	NA	NA	FALSE	NA	FALSE	151	Nucleoli;Nucleus;Cytosol	Intermediate filaments;Cytosol	Cytosol	TRUE
usp13	plec	plec_usp13	0.32116	3.08666e-05	0.000450538	NA	NA	FALSE	NA	FALSE	NA	Nucleoplasm;Nucleus;Cytosol	Intermediate filaments;Cytosol	Cytosol	TRUE
hdhd2	plec	hdhd2_plec	0.362242	2.1716e-06	4.92502e-05	NA	NA	FALSE	NA	FALSE	NA	Vesicles	Intermediate filaments;Cytosol		FALSE
nqo2	plec	nqo2_plec	0.601755	2.48266e-17	1.0417e-14	NA	NA	FALSE	NA	FALSE	NA	Cytosol	Intermediate filaments;Cytosol	Cytosol	TRUE
npepl1	plec	npepl1_plec	0.377889	7.13784e-07	1.92018e-05	NA	NA	FALSE	NA	FALSE	212	Nucleoplasm;Nucleus	Intermediate filaments;Cytosol		FALSE
gcdh	plec	gcdh_plec	0.307941	6.70806e-05	0.000850592	NA	NA	FALSE	NA	FALSE	NA	Mitochondria;Cytoplasm	Intermediate filaments;Cytosol		FALSE
hhatl	plec	hhatl_plec	0.443772	3.3254e-09	1.87595e-07	NA	NA	FALSE	NA	FALSE	NA	NA	Intermediate filaments;Cytosol		FALSE
ndufb7	plec	ndufb7_plec	0.491058	3.25841e-11	3.2211e-09	NA	NA	FALSE	NA	FALSE	NA	NA	Intermediate filaments;Cytosol		FALSE
ndufb11	plec	ndufb11_plec	0.353786	3.86826e-06	8.00578e-05	NA	NA	FALSE	NA	FALSE	NA	Mitochondria;Cytoplasm	Intermediate filaments;Cytosol		FALSE
vps25	plec	plec_vps25	0.416916	3.41378e-08	1.4175e-06	NA	NA	FALSE	NA	FALSE	NA	Centrosome	Intermediate filaments;Cytosol		FALSE
cox5a	plec	cox5a_plec	0.350757	4.73772e-06	9.49007e-05	NA	NA	FALSE	NA	FALSE	NA	NA	Intermediate filaments;Cytosol		FALSE
cisd1	plec	cisd1_plec	0.358063	2.89467e-06	6.2739e-05	NA	NA	FALSE	NA	FALSE	NA	Mitochondria;Cytoplasm	Intermediate filaments;Cytosol		FALSE
prkag1	plec	plec_prkag1	0.427267	1.42499e-08	6.65688e-07	NA	NA	FALSE	NA	FALSE	NA	Nucleoplasm;Nucleus;Cytosol	Intermediate filaments;Cytosol	Cytosol	TRUE
kyat1	plec	kyat1_plec	0.443213	3.49786e-09	1.96016e-07	NA	NA	FALSE	NA	FALSE	NA	NA	Intermediate filaments;Cytosol		FALSE
acss1	plec	acss1_plec	0.357397	3.02915e-06	6.51863e-05	NA	NA	FALSE	NA	FALSE	NA	NA	Intermediate filaments;Cytosol		FALSE
tapt1	plec	plec_tapt1	0.438396	5.38769e-09	2.85627e-07	NA	NA	FALSE	NA	FALSE	NA	Vesicles	Intermediate filaments;Cytosol		FALSE
mfn1	plec	mfn1_plec	0.384112	4.51102e-07	1.29965e-05	NA	NA	FALSE	NA	FALSE	NA	Mitochondria;Cytoplasm	Intermediate filaments;Cytosol		FALSE
klc2	plec	klc2_plec	0.317436	3.85543e-05	0.000540749	NA	NA	FALSE	NA	FALSE	197	Cytosol;Plasma membrane	Intermediate filaments;Cytosol	Cytosol	TRUE
coq3	plec	coq3_plec	0.39877	1.47319e-07	4.98784e-06	NA	NA	FALSE	NA	FALSE	NA	Nucleoplasm;Nucleus;Mitochondria;Cytoplasm	Intermediate filaments;Cytosol		FALSE
abhd16a	plec	abhd16a_plec	0.352617	4.18399e-06	8.55144e-05	NA	NA	FALSE	NA	FALSE	NA	NA	Intermediate filaments;Cytosol		FALSE
cops6	plec	cops6_plec	0.393717	2.1799e-07	6.98133e-06	NA	NA	FALSE	NA	FALSE	324	Nucleoplasm;Nucleus	Intermediate filaments;Cytosol		FALSE
alad	plec	alad_plec	0.397584	1.61599e-07	5.40016e-06	NA	NA	FALSE	NA	FALSE	NA	NA	Intermediate filaments;Cytosol		FALSE
mavs	plec	mavs_plec	0.411056	5.52658e-08	2.14669e-06	NA	NA	FALSE	NA	FALSE	NA	Mitochondria;Cytoplasm	Intermediate filaments;Cytosol		FALSE
nfs1	plec	nfs1_plec	0.387348	3.53974e-07	1.05646e-05	NA	NA	FALSE	NA	FALSE	NA	Nucleoplasm;Nucleus;Cytosol	Intermediate filaments;Cytosol	Cytosol	TRUE
mdp1	plec	mdp1_plec	0.406214	8.1714e-08	3.00694e-06	NA	NA	FALSE	NA	FALSE	NA	Nucleoplasm;Nucleus	Intermediate filaments;Cytosol		FALSE
ndufb9	plec	ndufb9_plec	0.387206	3.57801e-07	1.06618e-05	NA	NA	FALSE	NA	FALSE	NA	Mitochondria;Cytoplasm	Intermediate filaments;Cytosol		FALSE
carnmt1	plec	carnmt1_plec	0.314343	4.62711e-05	0.000628041	NA	NA	FALSE	NA	FALSE	NA	NA	Intermediate filaments;Cytosol		FALSE
ndufb8	plec	ndufb8_plec	0.49565	2.00034e-11	2.09065e-09	NA	NA	FALSE	NA	FALSE	NA	Mitochondria;Cytoplasm	Intermediate filaments;Cytosol		FALSE
bdh1	plec	bdh1_plec	0.393	2.30343e-07	7.318e-06	NA	NA	FALSE	NA	FALSE	NA	Mitochondria;Cytoplasm	Intermediate filaments;Cytosol		FALSE
ndufa7	plec	ndufa7_plec	0.386534	3.76341e-07	1.11332e-05	NA	NA	FALSE	NA	FALSE	NA	Mitochondria;Cytoplasm	Intermediate filaments;Cytosol		FALSE
ubr3	plec	plec_ubr3	0.330668	1.72622e-05	0.000278784	NA	NA	FALSE	NA	FALSE	NA	Nucleus;Nucleoli	Intermediate filaments;Cytosol		FALSE
bphl	plec	bphl_plec	0.353465	3.95256e-06	8.15239e-05	NA	NA	FALSE	NA	FALSE	NA	Nucleoplasm;Nucleus;Mitochondria;Cytoplasm	Intermediate filaments;Cytosol		FALSE
spryd4	plec	plec_spryd4	0.30529	7.80388e-05	0.000962358	NA	NA	FALSE	NA	FALSE	NA	Nucleoplasm;Nucleus	Intermediate filaments;Cytosol		FALSE
pter	plec	plec_pter	0.504668	7.50961e-12	8.77415e-10	NA	NA	FALSE	NA	FALSE	NA	Nucleoplasm;Nucleus	Intermediate filaments;Cytosol		FALSE
prkcq	plec	plec_prkcq	0.438218	5.47362e-09	2.89621e-07	NA	NA	FALSE	NA	FALSE	NA	Microtubule organizing center;Cytoskeleton	Intermediate filaments;Cytosol		FALSE
adck1	plec	adck1_plec	0.33933	9.99421e-06	0.000177068	NA	NA	FALSE	NA	FALSE	NA	Nucleoplasm;Nucleus	Intermediate filaments;Cytosol		FALSE
ufsp2	plec	plec_ufsp2	0.513647	2.75058e-12	3.59286e-10	NA	NA	FALSE	NA	FALSE	NA	Nucleus;Cytosol	Intermediate filaments;Cytosol	Cytosol	TRUE
pdk1	plec	pdk1_plec	0.445891	2.74298e-09	1.5851e-07	NA	NA	FALSE	NA	FALSE	NA	Nucleoli;Nucleus;Mitochondria;Cytoplasm	Intermediate filaments;Cytosol		FALSE
arl8b	plec	arl8b_plec	0.358195	2.86867e-06	6.22641e-05	NA	NA	FALSE	NA	FALSE	NA	NA	Intermediate filaments;Cytosol		FALSE
phpt1	plec	phpt1_plec	0.479925	1.03265e-10	8.90944e-09	NA	NA	FALSE	NA	FALSE	NA	Cytosol	Intermediate filaments;Cytosol	Cytosol	TRUE
mettl26	plec	mettl26_plec	0.4073	7.48911e-08	2.78938e-06	NA	NA	FALSE	NA	FALSE	NA	NA	Intermediate filaments;Cytosol		FALSE
vps36	plec	plec_vps36	0.324918	2.45879e-05	0.000373437	NA	NA	FALSE	NA	FALSE	NA	Vesicles	Intermediate filaments;Cytosol		FALSE
pgm5	plec	pgm5_plec	0.412236	5.01917e-08	1.9758e-06	NA	NA	FALSE	NA	FALSE	NA	NA	Intermediate filaments;Cytosol		FALSE
bola1	plec	bola1_plec	0.325383	2.39008e-05	0.000364826	NA	NA	FALSE	NA	FALSE	NA	NA	Intermediate filaments;Cytosol		FALSE
sccpdh	plec	plec_sccpdh	0.310052	5.94057e-05	0.000770308	NA	NA	FALSE	NA	FALSE	NA	Vesicles	Intermediate filaments;Cytosol		FALSE
abhd11	plec	abhd11_plec	0.314773	4.51185e-05	0.000615187	NA	NA	FALSE	NA	FALSE	NA	Mitochondria;Cytoplasm	Intermediate filaments;Cytosol		FALSE
dpp9	plec	dpp9_plec	0.312265	5.22493e-05	0.000693621	NA	NA	FALSE	NA	FALSE	NA	Cytosol	Intermediate filaments;Cytosol	Cytosol	TRUE
bckdhb	plec	bckdhb_plec	0.33113	1.67729e-05	0.00027223	NA	NA	FALSE	NA	FALSE	NA	NA	Intermediate filaments;Cytosol		FALSE
lypla1	plec	lypla1_plec	0.329554	1.84964e-05	0.000295137	NA	NA	FALSE	NA	FALSE	NA	Cytosol	Intermediate filaments;Cytosol	Cytosol	TRUE
prps1l3	plec	plec_prps1l3	0.350175	4.92496e-06	9.8022e-05	NA	NA	FALSE	NA	FALSE	NA	NA	Intermediate filaments;Cytosol		FALSE
tcap	plec	plec_tcap	0.329628	1.84128e-05	0.000294025	NA	NA	FALSE	NA	FALSE	362	NA	Intermediate filaments;Cytosol		FALSE
2210016f16rik	plec	2210016f16rik_plec	0.332542	1.5358e-05	0.00025307	NA	NA	FALSE	NA	FALSE	NA	NA	Intermediate filaments;Cytosol		FALSE
psmd8	plec	plec_psmd8	0.35064	4.77497e-06	9.55224e-05	NA	NA	FALSE	NA	FALSE	NA	Cytosol	Intermediate filaments;Cytosol	Cytosol	TRUE
coq10a	plec	coq10a_plec	0.438924	5.14017e-09	2.74152e-07	NA	NA	FALSE	NA	FALSE	NA	Cytosol	Intermediate filaments;Cytosol	Cytosol	TRUE
rrm1	plec	plec_rrm1	0.382088	5.24242e-07	1.47645e-05	NA	NA	FALSE	NA	FALSE	NA	Cytosol	Intermediate filaments;Cytosol	Cytosol	TRUE
fkbp1a	plec	fkbp1a_plec	0.34829	5.58012e-06	0.000108813	NA	NA	FALSE	NA	FALSE	153	Microtubules	Intermediate filaments;Cytosol		FALSE
asna1	plec	asna1_plec	0.302511	9.13088e-05	0.00109379	NA	NA	FALSE	NA	FALSE	NA	Nucleoli;Nucleus	Intermediate filaments;Cytosol		FALSE
pfn2	plec	pfn2_plec	0.362655	2.11039e-06	4.80778e-05	NA	NA	FALSE	NA	FALSE	NA	NA	Intermediate filaments;Cytosol		FALSE
lypla2	plec	lypla2_plec	0.319725	3.3639e-05	0.00048352	NA	NA	FALSE	NA	FALSE	NA	Cytosol	Intermediate filaments;Cytosol	Cytosol	TRUE
mipep	plec	mipep_plec	0.323739	2.64149e-05	0.000396272	NA	NA	FALSE	NA	FALSE	NA	Mitochondria;Cytoplasm	Intermediate filaments;Cytosol		FALSE
htra2	plec	htra2_plec	0.307973	6.69582e-05	0.00084935	NA	NA	FALSE	NA	FALSE	NA	Mitochondria;Cytoplasm	Intermediate filaments;Cytosol		FALSE
ethe1	plec	ethe1_plec	0.410296	5.87853e-08	2.2641e-06	NA	NA	FALSE	NA	FALSE	NA	Mitochondria;Cytoplasm	Intermediate filaments;Cytosol		FALSE
sgcg	plec	plec_sgcg	0.389447	3.02057e-07	9.22307e-06	NA	NA	FALSE	NA	FALSE	316	Nucleoplasm;Nucleus	Intermediate filaments;Cytosol		FALSE
isoc1	plec	isoc1_plec	0.343474	7.65e-06	0.000141653	NA	NA	FALSE	NA	FALSE	NA	Endoplasmic reticulum;Cytoplasm;Vesicles	Intermediate filaments;Cytosol		FALSE
vps13a	plec	plec_vps13a	0.35732	3.0451e-06	6.54767e-05	NA	NA	FALSE	NA	FALSE	NA	NA	Intermediate filaments;Cytosol		FALSE
cox5b	plec	cox5b_plec	0.343651	7.56235e-06	0.000140287	NA	NA	FALSE	NA	FALSE	NA	Mitochondria;Cytoplasm	Intermediate filaments;Cytosol		FALSE
mospd1	plec	mospd1_plec	0.302037	9.3774e-05	0.00111781	NA	NA	FALSE	NA	FALSE	181	Nucleoplasm;Nucleus;Vesicles	Intermediate filaments;Cytosol		FALSE
gsk3b	plec	gsk3b_plec	0.352554	4.20193e-06	8.58156e-05	NA	NA	FALSE	NA	FALSE	331	Nucleus	Intermediate filaments;Cytosol		FALSE
adprhl1	plec	adprhl1_plec	0.362324	2.15936e-06	4.90173e-05	NA	NA	FALSE	NA	FALSE	NA	Nucleoplasm;Nucleus	Intermediate filaments;Cytosol		FALSE
ndufs7	plec	ndufs7_plec	0.494359	2.29607e-11	2.36055e-09	NA	NA	FALSE	NA	FALSE	NA	NA	Intermediate filaments;Cytosol		FALSE
mpc1	plec	mpc1_plec	0.416358	3.57538e-08	1.47519e-06	NA	NA	FALSE	NA	FALSE	NA	Mitochondria;Cytoplasm	Intermediate filaments;Cytosol		FALSE
sdr39u1	plec	plec_sdr39u1	0.353553	3.92923e-06	8.11187e-05	NA	NA	FALSE	NA	FALSE	NA	Nucleoplasm;Nucleus;Cytosol	Intermediate filaments;Cytosol	Cytosol	TRUE
gstk1	plec	gstk1_plec	0.440331	4.53321e-09	2.4584e-07	NA	NA	FALSE	NA	FALSE	NA	Vesicles	Intermediate filaments;Cytosol		FALSE
epdr1	plec	epdr1_plec	0.387692	3.44924e-07	1.03325e-05	NA	NA	FALSE	NA	FALSE	NA	NA	Intermediate filaments;Cytosol		FALSE
ube2m	plec	plec_ube2m	0.331062	1.68439e-05	0.000273165	NA	NA	FALSE	NA	FALSE	NA	Nucleus	Intermediate filaments;Cytosol		FALSE
lars2	plec	lars2_plec	0.32471	2.49021e-05	0.00037737	NA	NA	FALSE	NA	FALSE	NA	Mitochondria;Cytoplasm	Intermediate filaments;Cytosol		FALSE
rpia	plec	plec_rpia	0.30101	9.93264e-05	0.00117126	NA	NA	FALSE	NA	FALSE	NA	Nucleoplasm;Nucleus;Vesicles;Plasma membrane	Intermediate filaments;Cytosol		FALSE
gstm4	plec	gstm4_plec	0.336614	1.18832e-05	0.0002045	NA	NA	FALSE	NA	FALSE	NA	Mitochondria;Cytoplasm	Intermediate filaments;Cytosol		FALSE
epm2a	plec	epm2a_plec	0.463936	5.04171e-10	3.59891e-08	NA	NA	FALSE	NA	FALSE	NA	Nucleoplasm;Nucleus	Intermediate filaments;Cytosol		FALSE
tfam	plec	plec_tfam	0.382177	5.20811e-07	1.46808e-05	NA	NA	FALSE	NA	FALSE	NA	Mitochondria;Cytoplasm	Intermediate filaments;Cytosol		FALSE
fn3k	plec	fn3k_plec	0.489498	3.83974e-11	3.72129e-09	NA	NA	FALSE	NA	FALSE	NA	Mitochondria;Cytoplasm	Intermediate filaments;Cytosol		FALSE
ndufc2	plec	ndufc2_plec	0.347078	6.04414e-06	0.000116336	NA	NA	FALSE	NA	FALSE	NA	Mitochondria;Cytoplasm	Intermediate filaments;Cytosol		FALSE
ndufab1	plec	ndufab1_plec	0.363915	1.93337e-06	4.46556e-05	NA	NA	FALSE	NA	FALSE	NA	Mitochondria;Cytoplasm	Intermediate filaments;Cytosol		FALSE
armt1	plec	armt1_plec	0.55909	1.05615e-14	2.47605e-12	NA	NA	FALSE	NA	FALSE	NA	Nucleus;Nuclear bodies;Nucleoplasm;Cytosol	Intermediate filaments;Cytosol	Cytosol	TRUE
selenot	plec	plec_selenot	0.405737	8.48948e-08	3.10701e-06	NA	NA	FALSE	NA	FALSE	NA	NA	Intermediate filaments;Cytosol		FALSE
nt5dc3	plec	nt5dc3_plec	0.397831	1.58527e-07	5.31251e-06	NA	NA	FALSE	NA	FALSE	NA	Cytosol;Mitochondria;Cytoplasm	Intermediate filaments;Cytosol	Cytosol	TRUE
hmbs	plec	hmbs_plec	0.408089	7.02829e-08	2.64083e-06	NA	NA	FALSE	NA	FALSE	NA	Lipid droplets	Intermediate filaments;Cytosol		FALSE
arih2	plec	arih2_plec	0.360306	2.48215e-06	5.51255e-05	NA	NA	FALSE	NA	FALSE	NA	Nucleoplasm;Nucleus	Intermediate filaments;Cytosol		FALSE
vps37c	plec	plec_vps37c	0.352199	4.30302e-06	8.75411e-05	NA	NA	FALSE	NA	FALSE	NA	Vesicles	Intermediate filaments;Cytosol		FALSE
isoc2a	plec	isoc2a_plec	0.382419	5.11559e-07	1.44599e-05	NA	NA	FALSE	NA	FALSE	NA	NA	Intermediate filaments;Cytosol		FALSE
guf1	plec	guf1_plec	0.366994	1.55843e-06	3.72168e-05	NA	NA	FALSE	NA	FALSE	NA	Nucleus;Mitochondria;Cytoplasm	Intermediate filaments;Cytosol		FALSE
micu3	plec	micu3_plec	0.469658	2.88534e-10	2.20483e-08	NA	NA	FALSE	NA	FALSE	NA	NA	Intermediate filaments;Cytosol		FALSE
mtx2	plec	mtx2_plec	0.343552	7.61136e-06	0.000141044	NA	NA	FALSE	NA	FALSE	NA	Mitochondria;Cytoplasm	Intermediate filaments;Cytosol		FALSE
khk	plec	khk_plec	0.340805	9.091e-06	0.000163633	NA	NA	FALSE	NA	FALSE	NA	Cytosol	Intermediate filaments;Cytosol	Cytosol	TRUE
acyp2	plec	acyp2_plec	0.438414	5.37915e-09	2.85247e-07	NA	NA	FALSE	NA	FALSE	NA	Nucleoplasm;Nucleus	Intermediate filaments;Cytosol		FALSE
kcnj11	plec	kcnj11_plec	0.357972	2.91266e-06	6.30737e-05	NA	NA	FALSE	NA	FALSE	NA	NA	Intermediate filaments;Cytosol		FALSE
pptc7	plec	plec_pptc7	0.350458	4.83313e-06	9.64932e-05	NA	NA	FALSE	NA	FALSE	NA	Cytosol;Plasma membrane	Intermediate filaments;Cytosol	Cytosol	TRUE
rdh14	plec	plec_rdh14	0.415132	3.9568e-08	1.61019e-06	NA	NA	FALSE	NA	FALSE	NA	Nucleoplasm;Nucleus	Intermediate filaments;Cytosol		FALSE
timm29	plec	plec_timm29	0.319842	3.34045e-05	0.000480746	NA	NA	FALSE	NA	FALSE	NA	NA	Intermediate filaments;Cytosol		FALSE
yars2	plec	plec_yars2	0.385604	4.03505e-07	1.18167e-05	NA	NA	FALSE	NA	FALSE	NA	Mitochondria;Cytoplasm	Intermediate filaments;Cytosol		FALSE
aprt	plec	aprt_plec	0.308428	6.52309e-05	0.000831433	NA	NA	FALSE	NA	FALSE	177	Nucleoplasm;Nucleus;Cytosol	Intermediate filaments;Cytosol	Cytosol	TRUE
mief2	plec	mief2_plec	0.437947	5.60721e-09	2.95838e-07	NA	NA	FALSE	NA	FALSE	NA	NA	Intermediate filaments;Cytosol		FALSE
phospho1	plec	phospho1_plec	0.358999	2.71505e-06	5.94469e-05	NA	NA	FALSE	NA	FALSE	NA	NA	Intermediate filaments;Cytosol		FALSE
lrrc20	plec	lrrc20_plec	0.419701	2.70656e-08	1.1597e-06	NA	NA	FALSE	NA	FALSE	NA	Nucleoplasm;Nucleus	Intermediate filaments;Cytosol		FALSE
mtx1	plec	mtx1_plec	0.310551	5.77144e-05	0.000752429	NA	NA	FALSE	NA	FALSE	NA	Mitochondria;Cytoplasm	Intermediate filaments;Cytosol		FALSE
pcyt2	plec	pcyt2_plec	0.327168	2.14275e-05	0.00033333	NA	NA	FALSE	NA	FALSE	NA	Centrosome	Intermediate filaments;Cytosol		FALSE
bcs1l	plec	bcs1l_plec	0.519686	1.37667e-12	1.94091e-10	NA	NA	FALSE	NA	FALSE	NA	Vesicles	Intermediate filaments;Cytosol		FALSE
prxl2b	plec	plec_prxl2b	0.352248	4.28873e-06	8.72985e-05	NA	NA	FALSE	NA	FALSE	NA	NA	Intermediate filaments;Cytosol		FALSE
ndufa11	plec	ndufa11_plec	0.406841	7.771e-08	2.87937e-06	NA	NA	FALSE	NA	FALSE	NA	Mitochondria;Cytoplasm	Intermediate filaments;Cytosol		FALSE
nceh1	plec	nceh1_plec	0.359174	2.68269e-06	5.88576e-05	NA	NA	FALSE	NA	FALSE	NA	Endoplasmic reticulum;Cytoplasm	Intermediate filaments;Cytosol		FALSE
aup1	plec	aup1_plec	0.42616	1.56675e-08	7.22549e-07	NA	NA	FALSE	NA	FALSE	NA	Nucleoplasm;Nucleus;Vesicles	Intermediate filaments;Cytosol		FALSE
nqo1	plec	nqo1_plec	0.309305	6.20227e-05	0.00079794	NA	NA	FALSE	NA	FALSE	NA	Cytosol	Intermediate filaments;Cytosol	Cytosol	TRUE
pam16	plec	pam16_plec	0.302907	8.92979e-05	0.00107427	NA	NA	FALSE	NA	FALSE	NA	Nucleoplasm;Nucleus;Mitochondria;Cytoplasm	Intermediate filaments;Cytosol		FALSE
slc25a31	plec	plec_slc25a31	0.525083	7.33013e-13	1.10568e-10	NA	NA	FALSE	NA	FALSE	216	Mitochondria;Cytoplasm	Intermediate filaments;Cytosol		FALSE
rraga	plec	plec_rraga	0.348161	5.62783e-06	0.000109595	NA	NA	FALSE	NA	FALSE	NA	Golgi apparatus;Cytoplasm;Vesicles	Intermediate filaments;Cytosol		FALSE
mmab	plec	mmab_plec	0.432322	9.20109e-09	4.55308e-07	NA	NA	FALSE	NA	FALSE	NA	Mitochondria;Cytoplasm	Intermediate filaments;Cytosol		FALSE
slirp	plec	plec_slirp	0.346278	6.37009e-06	0.000121585	NA	NA	FALSE	NA	FALSE	278	Mitochondria;Cytoplasm	Intermediate filaments;Cytosol		FALSE
fundc2	plec	fundc2_plec	0.422792	2.08651e-08	9.25905e-07	NA	NA	FALSE	NA	FALSE	NA	NA	Intermediate filaments;Cytosol		FALSE
atp5l	plec	atp5l_plec	0.440572	4.43619e-09	2.41289e-07	NA	NA	FALSE	NA	FALSE	NA	Mitochondria;Cytoplasm	Intermediate filaments;Cytosol		FALSE
arpc5l	plec	arpc5l_plec	0.307529	6.86827e-05	0.000866975	NA	NA	FALSE	NA	FALSE	278	NA	Intermediate filaments;Cytosol		FALSE
cox6b1	plec	cox6b1_plec	0.482198	8.18704e-11	7.26049e-09	NA	NA	FALSE	NA	FALSE	NA	Mitochondria;Cytoplasm	Intermediate filaments;Cytosol		FALSE
hccs	plec	hccs_plec	0.314843	4.49331e-05	0.000613126	NA	NA	FALSE	NA	FALSE	NA	Mitochondria;Cytoplasm	Intermediate filaments;Cytosol		FALSE
abcc1	plec	abcc1_plec	0.333627	1.4349e-05	0.000239147	NA	NA	FALSE	NA	FALSE	220	Plasma membrane	Intermediate filaments;Cytosol		FALSE
ndufaf5	plec	ndufaf5_plec	0.301621	9.59851e-05	0.00113922	NA	NA	FALSE	NA	FALSE	NA	NA	Intermediate filaments;Cytosol		FALSE
ndufaf4	plec	ndufaf4_plec	0.383989	4.55242e-07	1.3097e-05	NA	NA	FALSE	NA	FALSE	NA	Mitochondria;Cytoplasm	Intermediate filaments;Cytosol		FALSE
slc44a2	plec	plec_slc44a2	0.377211	7.49935e-07	2.0026e-05	NA	NA	FALSE	NA	FALSE	NA	Vesicles;Cell Junctions	Intermediate filaments;Cytosol		FALSE
cdnf	plec	cdnf_plec	0.411354	5.39372e-08	2.10242e-06	NA	NA	FALSE	NA	FALSE	NA	NA	Intermediate filaments;Cytosol		FALSE
ndufb6	plec	ndufb6_plec	0.535946	1.99171e-13	3.45567e-11	NA	NA	FALSE	NA	FALSE	NA	Mitochondria;Cytoplasm	Intermediate filaments;Cytosol		FALSE
cox6a2	plec	cox6a2_plec	0.403008	1.05509e-07	3.74471e-06	NA	NA	FALSE	NA	FALSE	NA	NA	Intermediate filaments;Cytosol		FALSE
osbpl1a	plec	osbpl1a_plec	0.310728	5.71264e-05	0.000746195	NA	NA	FALSE	NA	FALSE	NA	Nucleoplasm;Nucleus;Cytosol	Intermediate filaments;Cytosol	Cytosol	TRUE
bckdk	plec	bckdk_plec	0.411521	5.32075e-08	2.07778e-06	NA	NA	FALSE	NA	FALSE	NA	Mitochondria;Cytoplasm	Intermediate filaments;Cytosol		FALSE
dnaaf5	plec	dnaaf5_plec	0.301691	9.5612e-05	0.00113557	NA	NA	FALSE	NA	FALSE	NA	Nucleoplasm;Nucleus	Intermediate filaments;Cytosol		FALSE
them6	plec	plec_them6	0.459398	7.79161e-10	5.27443e-08	NA	NA	FALSE	NA	FALSE	NA	Nuclear speckles;Nucleoplasm;Nucleus;Cytosol	Intermediate filaments;Cytosol	Cytosol	TRUE
wwp1	plec	plec_wwp1	0.351812	4.41568e-06	8.94651e-05	NA	NA	FALSE	NA	FALSE	NA	Cytosol	Intermediate filaments;Cytosol	Cytosol	TRUE
naxe	plec	naxe_plec	0.304284	8.26162e-05	0.00100822	NA	NA	FALSE	NA	FALSE	NA	NA	Intermediate filaments;Cytosol		FALSE
hscb	plec	hscb_plec	0.324873	2.46557e-05	0.000374293	NA	NA	FALSE	NA	FALSE	NA	Nucleus;Cytosol;Mitochondria;Cytoplasm	Intermediate filaments;Cytosol	Cytosol	TRUE
ndufa2	plec	ndufa2_plec	0.450019	1.87801e-09	1.13832e-07	NA	NA	FALSE	NA	FALSE	NA	NA	Intermediate filaments;Cytosol		FALSE
cdk16	plec	cdk16_plec	0.327635	2.08218e-05	0.000325505	NA	NA	FALSE	NA	FALSE	NA	Microtubules;Cytosol;Plasma membrane	Intermediate filaments;Cytosol	Cytosol	TRUE
gtdc1	plec	gtdc1_plec	0.372436	1.05886e-06	2.68296e-05	NA	NA	FALSE	NA	FALSE	NA	Cytosol	Intermediate filaments;Cytosol	Cytosol	TRUE
oxa1l	plec	oxa1l_plec	0.382895	4.93811e-07	1.40322e-05	NA	NA	FALSE	NA	FALSE	NA	Mitochondria;Cytoplasm	Intermediate filaments;Cytosol		FALSE
agrn	plec	agrn_plec	0.308488	6.50075e-05	0.0008291	NA	NA	FALSE	NA	FALSE	400	Cytosol;Plasma membrane	Intermediate filaments;Cytosol	Cytosol	TRUE
atp5j2	plec	atp5j2_plec	0.412304	4.99146e-08	1.96658e-06	NA	NA	FALSE	NA	FALSE	NA	Mitochondria;Cytoplasm	Intermediate filaments;Cytosol		FALSE
vmp1	plec	plec_vmp1	0.313489	4.86467e-05	0.000654281	NA	NA	FALSE	NA	FALSE	NA	Endoplasmic reticulum;Cytoplasm	Intermediate filaments;Cytosol		FALSE
dennd4b	plec	dennd4b_plec	0.381434	5.50225e-07	1.5385e-05	NA	NA	FALSE	NA	FALSE	NA	Nucleus;Golgi apparatus;Cytoplasm	Intermediate filaments;Cytosol		FALSE
slc25a46	plec	plec_slc25a46	0.321429	3.03719e-05	0.000444545	NA	NA	FALSE	NA	FALSE	NA	Mitochondria;Cytoplasm	Intermediate filaments;Cytosol		FALSE
ndufaf6	plec	ndufaf6_plec	0.331994	1.58938e-05	0.000260387	NA	NA	FALSE	NA	FALSE	NA	NA	Intermediate filaments;Cytosol		FALSE
hars2	plec	hars2_plec	0.332584	1.53181e-05	0.000252517	NA	NA	FALSE	NA	FALSE	NA	Cytosol	Intermediate filaments;Cytosol	Cytosol	TRUE
sco2	plec	plec_sco2	0.345941	6.5124e-06	0.000123845	NA	NA	FALSE	NA	FALSE	NA	Nucleoplasm;Nucleus;Mitochondria;Cytoplasm	Intermediate filaments;Cytosol		FALSE
nadk2	plec	nadk2_plec	0.37787	7.14807e-07	1.9225e-05	NA	NA	FALSE	NA	FALSE	NA	NA	Intermediate filaments;Cytosol		FALSE
prmt3	plec	plec_prmt3	0.303575	8.59951e-05	0.00104168	NA	NA	FALSE	NA	FALSE	NA	NA	Intermediate filaments;Cytosol		FALSE
mtfp1	plec	mtfp1_plec	0.541394	1.01795e-13	1.89686e-11	NA	NA	FALSE	NA	FALSE	NA	Mitochondria;Cytoplasm	Intermediate filaments;Cytosol		FALSE
tars2	plec	plec_tars2	0.328125	2.02028e-05	0.000317504	NA	NA	FALSE	NA	FALSE	NA	Nucleoplasm;Nucleus;Cytosol	Intermediate filaments;Cytosol	Cytosol	TRUE
hikeshi	plec	hikeshi_plec	0.423003	2.04956e-08	9.11883e-07	NA	NA	FALSE	NA	FALSE	NA	NA	Intermediate filaments;Cytosol		FALSE
otud7b	plec	otud7b_plec	0.321536	3.01768e-05	0.000442232	NA	NA	FALSE	NA	FALSE	NA	Nucleoplasm;Nucleus;Microtubules	Intermediate filaments;Cytosol		FALSE
htt	plec	htt_plec	0.388088	3.34761e-07	1.00698e-05	NA	NA	FALSE	NA	FALSE	209	Nucleoplasm;Nucleus	Intermediate filaments;Cytosol		FALSE
smpd2	plec	plec_smpd2	0.340385	9.34005e-06	0.00016737	NA	NA	FALSE	NA	FALSE	NA	Vesicles;Plasma membrane	Intermediate filaments;Cytosol		FALSE
msrb2	plec	msrb2_plec	0.328582	1.96425e-05	0.000310141	NA	NA	FALSE	NA	FALSE	NA	NA	Intermediate filaments;Cytosol		FALSE
ndufb3	plec	ndufb3_plec	0.395922	1.83879e-07	6.03423e-06	NA	NA	FALSE	NA	FALSE	NA	NA	Intermediate filaments;Cytosol		FALSE
mars2	plec	mars2_plec	0.423555	1.95595e-08	8.75815e-07	NA	NA	FALSE	NA	FALSE	NA	Intermediate filaments;Cytosol	Intermediate filaments;Cytosol	Intermediate filaments;Cytosol	TRUE
tmem65	plec	plec_tmem65	0.341812	8.51953e-06	0.000154991	NA	NA	FALSE	NA	FALSE	NA	Nucleoplasm;Nucleus	Intermediate filaments;Cytosol		FALSE
coa7	plec	coa7_plec	0.316295	4.12481e-05	0.000571558	NA	NA	FALSE	NA	FALSE	NA	Nucleus;Mitochondria;Cytoplasm	Intermediate filaments;Cytosol		FALSE
mkrn2	plec	mkrn2_plec	0.387303	3.55184e-07	1.05946e-05	NA	NA	FALSE	NA	FALSE	NA	Nucleoplasm;Nucleus;Cytosol	Intermediate filaments;Cytosol	Cytosol	TRUE
fitm1	plec	fitm1_plec	0.41891	2.89157e-08	1.22831e-06	NA	NA	FALSE	NA	FALSE	NA	NA	Intermediate filaments;Cytosol		FALSE
wdsub1	plec	plec_wdsub1	0.313836	4.76668e-05	0.00064346	NA	NA	FALSE	NA	FALSE	195	Nucleoli;Nucleus	Intermediate filaments;Cytosol		FALSE
fntb	plec	fntb_plec	0.321215	3.07638e-05	0.000449287	NA	NA	FALSE	NA	FALSE	NA	Centrosome	Intermediate filaments;Cytosol		FALSE
pcmtd1	plec	pcmtd1_plec	0.391901	2.50581e-07	7.86403e-06	NA	NA	FALSE	NA	FALSE	NA	Plasma membrane	Intermediate filaments;Cytosol		FALSE
cacng6	plec	cacng6_plec	0.33689	1.16771e-05	0.000201538	NA	NA	FALSE	NA	FALSE	NA	Nucleoli;Nucleus (Fibrillar center)	Intermediate filaments;Cytosol		FALSE
szrd1	plec	plec_szrd1	0.324096	2.58493e-05	0.000389245	NA	NA	FALSE	NA	FALSE	NA	Nucleoplasm;Nucleus;Cytosol	Intermediate filaments;Cytosol	Cytosol	TRUE
senp8	plec	plec_senp8	0.314838	4.49469e-05	0.000613282	NA	NA	FALSE	NA	FALSE	NA	Nucleoplasm;Nucleus;Vesicles	Intermediate filaments;Cytosol		FALSE
naa20	plec	naa20_plec	0.340977	8.9907e-06	0.000162125	NA	NA	FALSE	NA	FALSE	NA	Cytosol	Intermediate filaments;Cytosol	Cytosol	TRUE
dmac2l	plec	dmac2l_plec	0.322666	2.81886e-05	0.00041802	NA	NA	FALSE	NA	FALSE	NA	NA	Intermediate filaments;Cytosol		FALSE
mien1	plec	mien1_plec	0.337176	1.14663e-05	0.000198517	NA	NA	FALSE	NA	FALSE	NA	NA	Intermediate filaments;Cytosol		FALSE
mif	plec	mif_plec	0.308423	6.52487e-05	0.000831608	NA	NA	FALSE	NA	FALSE	NA	Cytosol	Intermediate filaments;Cytosol	Cytosol	TRUE
prnp	plec	plec_prnp	0.365411	1.74157e-06	4.08889e-05	NA	NA	FALSE	NA	FALSE	NA	Nuclear membrane;Nucleus;Cytosol	Intermediate filaments;Cytosol	Cytosol	TRUE
cox3	plec	cox3_plec	0.347933	5.71329e-06	0.000110991	NA	NA	FALSE	NA	FALSE	NA	NA	Intermediate filaments;Cytosol		FALSE
cox3	plec	cox3_plec	0.347933	5.71329e-06	0.000110991	NA	NA	FALSE	NA	FALSE	NA	NA	Intermediate filaments;Cytosol		FALSE
impa2	plec	impa2_plec	0.305872	7.5497e-05	0.000936698	NA	NA	FALSE	NA	FALSE	NA	Nucleoplasm;Nucleus;Mitochondria;Cytoplasm	Intermediate filaments;Cytosol		FALSE
uqcr11	plec	plec_uqcr11	0.402997	1.05607e-07	3.74776e-06	NA	NA	FALSE	NA	FALSE	NA	NA	Intermediate filaments;Cytosol		FALSE
rapgef1	plec	plec_rapgef1	0.32432	2.55005e-05	0.000384873	NA	NA	FALSE	NA	FALSE	NA	Vesicles	Intermediate filaments;Cytosol		FALSE
atp6ap1	plec	atp6ap1_plec	0.32681	2.19032e-05	0.000339438	NA	NA	FALSE	NA	FALSE	NA	Microtubules;Cytosol;Plasma membrane	Intermediate filaments;Cytosol	Cytosol	TRUE
arhgef10l	plec	arhgef10l_plec	0.374671	9.01652e-07	2.34176e-05	NA	NA	FALSE	NA	FALSE	NA	Golgi apparatus;Cytoplasm;Vesicles;Cytosol	Intermediate filaments;Cytosol	Cytosol	TRUE
urm1	plec	plec_urm1	0.312888	5.03828e-05	0.000673426	NA	NA	FALSE	NA	FALSE	NA	Vesicles	Intermediate filaments;Cytosol		FALSE
alg1	plec	alg1_plec	0.351195	4.60152e-06	9.26319e-05	NA	NA	FALSE	NA	FALSE	NA	Endoplasmic reticulum;Cytoplasm	Intermediate filaments;Cytosol		FALSE
uqcc3	plec	plec_uqcc3	0.302039	9.37628e-05	0.00111769	NA	NA	FALSE	NA	FALSE	NA	Nucleoplasm;Nucleus	Intermediate filaments;Cytosol		FALSE
tmem126a	plec	plec_tmem126a	0.522221	1.02535e-12	1.492e-10	NA	NA	FALSE	NA	FALSE	190	Cytosol	Intermediate filaments;Cytosol	Cytosol	TRUE
sdhd	plec	plec_sdhd	0.352204	4.30142e-06	8.75131e-05	NA	NA	FALSE	NA	FALSE	NA	NA	Intermediate filaments;Cytosol		FALSE
gorasp1	plec	gorasp1_plec	0.316574	4.05727e-05	0.00056383	NA	NA	FALSE	NA	FALSE	NA	Golgi apparatus;Cytoplasm	Intermediate filaments;Cytosol		FALSE
fundc1	plec	fundc1_plec	0.435885	6.73071e-09	3.46823e-07	NA	NA	FALSE	NA	FALSE	NA	NA	Intermediate filaments;Cytosol		FALSE
atp5md	plec	atp5md_plec	0.447533	2.36072e-09	1.38988e-07	NA	NA	FALSE	NA	FALSE	NA	NA	Intermediate filaments;Cytosol		FALSE
asap2	plec	asap2_plec	0.318684	3.57956e-05	0.000508867	NA	NA	FALSE	NA	FALSE	229	Cytosol	Intermediate filaments;Cytosol	Cytosol	TRUE
hint3	plec	hint3_plec	0.320976	3.12092e-05	0.000454589	NA	NA	FALSE	NA	FALSE	NA	Nucleoli;Nucleus;Cytosol;Mitochondria;Cytoplasm	Intermediate filaments;Cytosol	Cytosol	TRUE
grb14	plec	grb14_plec	0.359589	2.60739e-06	5.74633e-05	NA	NA	FALSE	NA	FALSE	NA	Nucleoplasm;Nucleus;Cytosol	Intermediate filaments;Cytosol	Cytosol	TRUE
mrps2	plec	mrps2_plec	0.365171	1.77106e-06	4.14678e-05	NA	NA	FALSE	NA	FALSE	583	Mitochondria;Cytoplasm	Intermediate filaments;Cytosol		FALSE
mtmr10	plec	mtmr10_plec	0.337453	1.12664e-05	0.000195624	NA	NA	FALSE	NA	FALSE	NA	Nucleoplasm;Nucleus;Nuclear bodies	Intermediate filaments;Cytosol		FALSE
saraf	plec	plec_saraf	0.337675	1.11081e-05	0.000193325	NA	NA	FALSE	NA	FALSE	NA	Endoplasmic reticulum;Cytoplasm	Intermediate filaments;Cytosol		FALSE
ndufa1	plec	ndufa1_plec	0.41503	3.99027e-08	1.62206e-06	NA	NA	FALSE	NA	FALSE	NA	Cytosol;Mitochondria;Cytoplasm	Intermediate filaments;Cytosol	Cytosol	TRUE
smim12	plec	plec_smim12	0.332521	1.53783e-05	0.000253347	NA	NA	FALSE	NA	FALSE	NA	Mitochondria;Cytoplasm	Intermediate filaments;Cytosol		FALSE
fam173a	plec	fam173a_plec	0.307902	6.72304e-05	0.00085215	NA	NA	FALSE	NA	FALSE	NA	Cytosol	Intermediate filaments;Cytosol	Cytosol	TRUE
atp6v1g1	plec	atp6v1g1_plec	0.307987	6.69026e-05	0.000848782	NA	NA	FALSE	NA	FALSE	NA	Nucleus;Nucleoli	Intermediate filaments;Cytosol		FALSE
cog6	plec	cog6_plec	0.311018	5.61742e-05	0.000736033	NA	NA	FALSE	NA	FALSE	NA	Nuclear speckles;Nucleoplasm;Nucleus;Golgi apparatus;Cytoplasm	Intermediate filaments;Cytosol		FALSE
olfr48	plec	olfr48_plec	0.356269	3.27065e-06	6.95403e-05	NA	NA	FALSE	NA	FALSE	NA	NA	Intermediate filaments;Cytosol		FALSE
col16a1	plec	col16a1_plec	0.31911	3.48977e-05	0.000498393	NA	NA	FALSE	NA	FALSE	NA	Golgi apparatus;Cytoplasm;Cytosol;Plasma membrane	Intermediate filaments;Cytosol	Cytosol	TRUE
nedd4	myh8	myh8_nedd4	0.306446	7.30679e-05	0.000912034	NA	NA	FALSE	NA	FALSE	NA	Cytosol	NA		FALSE
cct8	myh8	cct8_myh8	0.32156	3.01322e-05	0.000441701	NA	NA	FALSE	NA	FALSE	NA	Intermediate filaments	NA		FALSE
ociad1	myh8	myh8_ociad1	0.351863	4.40064e-06	8.92055e-05	NA	NA	FALSE	NA	FALSE	NA	Mitochondria;Cytoplasm	NA		FALSE
prkaa1	myh8	myh8_prkaa1	0.398603	1.49252e-07	5.04382e-06	NA	NA	FALSE	NA	FALSE	NA	Nuclear speckles;Nucleoplasm;Nucleus	NA		FALSE
arl6ip5	myh8	arl6ip5_myh8	0.329676	1.83579e-05	0.000293295	NA	NA	FALSE	NA	FALSE	NA	Endoplasmic reticulum;Cytoplasm	NA		FALSE
dnajc19	myh8	dnajc19_myh8	0.31705	3.94468e-05	0.000550968	NA	NA	FALSE	NA	FALSE	NA	NA	NA		FALSE
nudt21	myh8	myh8_nudt21	0.307229	6.98732e-05	0.000879354	NA	NA	FALSE	NA	FALSE	NA	Nuclear bodies;Nucleoplasm;Nucleus	NA		FALSE
gnpda2	myh8	gnpda2_myh8	0.308748	6.40433e-05	0.000819054	NA	NA	FALSE	NA	FALSE	NA	Vesicles	NA		FALSE
cacybp	myh8	cacybp_myh8	0.302594	9.08827e-05	0.00108962	NA	NA	FALSE	NA	FALSE	NA	Cytosol	NA		FALSE
sec13	myh8	myh8_sec13	0.392691	2.35875e-07	7.46809e-06	NA	NA	FALSE	NA	FALSE	NA	Nucleoplasm;Nucleus;Vesicles	NA		FALSE
map7d1	myh8	map7d1_myh8	0.377695	7.2397e-07	1.94351e-05	NA	NA	FALSE	NA	FALSE	NA	Microtubules;Cytosol	NA		FALSE
lclat1	myh8	lclat1_myh8	0.370596	1.20768e-06	2.99936e-05	NA	NA	FALSE	NA	FALSE	NA	Endoplasmic reticulum;Cytoplasm	NA		FALSE
ppp6r2	myh8	myh8_ppp6r2	0.326958	2.17055e-05	0.000336894	NA	NA	FALSE	NA	FALSE	NA	Vesicles;Cytosol	NA		FALSE
lsm5	myh8	lsm5_myh8	0.327851	2.05472e-05	0.000321966	NA	NA	FALSE	NA	FALSE	NA	NA	NA		FALSE
neb	obscn	neb_obscn	0.363686	1.96451e-06	4.52641e-05	NA	NA	FALSE	NA	FALSE	697	NA	Cytosol;Plasma membrane		FALSE
neb	obscn	neb_obscn	0.363686	1.96451e-06	4.52641e-05	NA	NA	FALSE	NA	FALSE	697	NA	Cytosol;Plasma membrane		FALSE
ppp5c	obscn	obscn_ppp5c	0.407268	7.50861e-08	2.79558e-06	NA	NA	FALSE	NA	FALSE	220	Vesicles;Cytosol	Cytosol;Plasma membrane	Cytosol	TRUE
ppp5c	obscn	obscn_ppp5c	0.407268	7.50861e-08	2.79558e-06	NA	NA	FALSE	NA	FALSE	220	Vesicles;Cytosol	Cytosol;Plasma membrane	Cytosol	TRUE
rab18	obscn	obscn_rab18	0.394322	2.08075e-07	6.70926e-06	NA	NA	FALSE	NA	FALSE	NA	NA	Cytosol;Plasma membrane		FALSE
rab18	obscn	obscn_rab18	0.394322	2.08075e-07	6.70926e-06	NA	NA	FALSE	NA	FALSE	NA	NA	Cytosol;Plasma membrane		FALSE
prune1	obscn	obscn_prune1	0.326246	2.26741e-05	0.000349243	NA	NA	FALSE	NA	FALSE	NA	NA	Cytosol;Plasma membrane		FALSE
prune1	obscn	obscn_prune1	0.326246	2.26741e-05	0.000349243	NA	NA	FALSE	NA	FALSE	NA	NA	Cytosol;Plasma membrane		FALSE
cab39	obscn	cab39_obscn	0.346512	6.27303e-06	0.000120028	NA	NA	FALSE	NA	FALSE	NA	Nucleoli;Nucleus	Cytosol;Plasma membrane		FALSE
cab39	obscn	cab39_obscn	0.346512	6.27303e-06	0.000120028	NA	NA	FALSE	NA	FALSE	NA	Nucleoli;Nucleus	Cytosol;Plasma membrane		FALSE
hadha	myh7	hadha_myh7	0.398749	1.47557e-07	4.99476e-06	NA	NA	FALSE	NA	FALSE	NA	Mitochondria;Cytoplasm	NA		FALSE
sdha	myh7	myh7_sdha	0.350178	4.92404e-06	9.80078e-05	NA	NA	FALSE	NA	FALSE	NA	Mitochondria;Cytoplasm	NA		FALSE
atp5a1	myh7	atp5a1_myh7	0.364625	1.84003e-06	4.28196e-05	NA	NA	FALSE	NA	FALSE	NA	Mitochondria;Cytoplasm	NA		FALSE
cryab	myh7	cryab_myh7	0.615734	2.79024e-18	1.4327e-15	NA	NA	FALSE	NA	FALSE	434	Cytosol;Plasma membrane	NA		FALSE
slmap	myh7	myh7_slmap	0.628634	3.36373e-19	2.08332e-16	NA	NA	FALSE	NA	FALSE	NA	Endoplasmic reticulum;Cytoplasm	NA		FALSE
wfs1	myh7	myh7_wfs1	0.332745	1.51644e-05	0.000250435	NA	NA	FALSE	NA	FALSE	NA	NA	NA		FALSE
eci2	myh7	eci2_myh7	0.33945	9.91741e-06	0.000175934	NA	NA	FALSE	NA	FALSE	NA	Vesicles	NA		FALSE
atp1b1	myh7	atp1b1_myh7	0.304029	8.38172e-05	0.00102015	NA	NA	FALSE	NA	FALSE	NA	NA	NA		FALSE
c1qbp	myh7	c1qbp_myh7	0.325229	2.41265e-05	0.000367667	NA	NA	FALSE	NA	FALSE	NA	Plasma membrane	NA		FALSE
ablim2	myh7	ablim2_myh7	0.358192	2.86922e-06	6.22744e-05	NA	NA	FALSE	NA	FALSE	NA	Mitochondria;Cytoplasm	NA		FALSE
ppm1b	myh7	myh7_ppm1b	0.330802	1.71188e-05	0.000276863	NA	NA	FALSE	NA	FALSE	NA	Nucleoli;Nucleus;Cytosol	NA		FALSE
obscn	obscn	obscn_obscn	0.590783	1.28254e-16	4.62154e-14	NA	NA	FALSE	NA	FALSE	NA	Cytosol;Plasma membrane	Cytosol;Plasma membrane	Cytosol;Plasma membrane	TRUE
obscn	obscn	obscn_obscn	0.590783	1.28254e-16	4.62154e-14	NA	NA	FALSE	NA	FALSE	NA	Cytosol;Plasma membrane	Cytosol;Plasma membrane	Cytosol;Plasma membrane	TRUE
obscn	obscn	obscn_obscn	0.590783	1.28254e-16	4.62154e-14	NA	NA	FALSE	NA	FALSE	NA	Cytosol;Plasma membrane	Cytosol;Plasma membrane	Cytosol;Plasma membrane	TRUE
obscn	obscn	obscn_obscn	0.590783	1.28254e-16	4.62154e-14	NA	NA	FALSE	NA	FALSE	NA	Cytosol;Plasma membrane	Cytosol;Plasma membrane	Cytosol;Plasma membrane	TRUE
lamc1	obscn	lamc1_obscn	0.323102	2.74553e-05	0.000409069	NA	NA	FALSE	NA	FALSE	NA	Endoplasmic reticulum;Cytoplasm;Plasma membrane	Cytosol;Plasma membrane	Plasma membrane	TRUE
lamc1	obscn	lamc1_obscn	0.323102	2.74553e-05	0.000409069	NA	NA	FALSE	NA	FALSE	NA	Endoplasmic reticulum;Cytoplasm;Plasma membrane	Cytosol;Plasma membrane	Plasma membrane	TRUE
sar1a	obscn	obscn_sar1a	0.368886	1.36362e-06	3.3241e-05	NA	NA	FALSE	NA	FALSE	NA	Endoplasmic reticulum;Cytoplasm	Cytosol;Plasma membrane		FALSE
sar1a	obscn	obscn_sar1a	0.368886	1.36362e-06	3.3241e-05	NA	NA	FALSE	NA	FALSE	NA	Endoplasmic reticulum;Cytoplasm	Cytosol;Plasma membrane		FALSE
smyd2	obscn	obscn_smyd2	0.374411	9.18714e-07	2.37888e-05	NA	NA	FALSE	NA	FALSE	NA	Cytosol	Cytosol;Plasma membrane	Cytosol	TRUE
smyd2	obscn	obscn_smyd2	0.374411	9.18714e-07	2.37888e-05	NA	NA	FALSE	NA	FALSE	NA	Cytosol	Cytosol;Plasma membrane	Cytosol	TRUE
hspb1	obscn	hspb1_obscn	0.327982	2.03817e-05	0.000319832	NA	NA	FALSE	NA	FALSE	NA	Cytosol;Plasma membrane	Cytosol;Plasma membrane	Cytosol;Plasma membrane	TRUE
hspb1	obscn	hspb1_obscn	0.327982	2.03817e-05	0.000319832	NA	NA	FALSE	NA	FALSE	NA	Cytosol;Plasma membrane	Cytosol;Plasma membrane	Cytosol;Plasma membrane	TRUE
itpa	obscn	itpa_obscn	0.312404	5.18257e-05	0.000689062	NA	NA	FALSE	NA	FALSE	NA	Cytosol	Cytosol;Plasma membrane	Cytosol	TRUE
itpa	obscn	itpa_obscn	0.312404	5.18257e-05	0.000689062	NA	NA	FALSE	NA	FALSE	NA	Cytosol	Cytosol;Plasma membrane	Cytosol	TRUE
nae1	obscn	nae1_obscn	0.317674	3.8014e-05	0.000534558	NA	NA	FALSE	NA	FALSE	NA	Nucleus	Cytosol;Plasma membrane		FALSE
nae1	obscn	nae1_obscn	0.317674	3.8014e-05	0.000534558	NA	NA	FALSE	NA	FALSE	NA	Nucleus	Cytosol;Plasma membrane		FALSE
flnb	ahnak	ahnak_flnb	0.340344	9.36476e-06	0.000167742	NA	NA	FALSE	NA	FALSE	474	Plasma membrane	Cytosol;Plasma membrane	Plasma membrane	TRUE
plin4	ahnak	ahnak_plin4	0.322397	2.86506e-05	0.000423693	NA	NA	FALSE	NA	FALSE	NA	Lipid droplets;Cytosol;Plasma membrane	Cytosol;Plasma membrane	Cytosol;Plasma membrane	TRUE
lamb1	ahnak	ahnak_lamb1	0.363295	2.01857e-06	4.63042e-05	NA	NA	FALSE	NA	FALSE	NA	NA	Cytosol;Plasma membrane		FALSE
lgals1	ahnak	ahnak_lgals1	0.392403	2.41131e-07	7.6107e-06	NA	NA	FALSE	NA	FALSE	171	Cytosol	Cytosol;Plasma membrane	Cytosol	TRUE
g3bp1	ahnak	ahnak_g3bp1	0.479054	1.12818e-10	9.63704e-09	NA	NA	FALSE	NA	FALSE	NA	Cytosol	Cytosol;Plasma membrane	Cytosol	TRUE
ezr	ahnak	ahnak_ezr	0.322657	2.82032e-05	0.000418199	NA	NA	FALSE	NA	FALSE	524	Plasma membrane	Cytosol;Plasma membrane	Plasma membrane	TRUE
mrc1	ahnak	ahnak_mrc1	0.410697	5.69024e-08	2.2014e-06	NA	NA	FALSE	NA	FALSE	NA	NA	Cytosol;Plasma membrane		FALSE
ywhah	ahnak	ahnak_ywhah	0.38484	4.27233e-07	1.24048e-05	NA	NA	FALSE	NA	FALSE	NA	NA	Cytosol;Plasma membrane		FALSE
pcbp2	ahnak	ahnak_pcbp2	0.312758	5.07674e-05	0.000677589	NA	NA	FALSE	NA	FALSE	NA	Nucleoplasm;Nucleus	Cytosol;Plasma membrane		FALSE
psme1	ahnak	ahnak_psme1	0.427088	1.44708e-08	6.74594e-07	NA	NA	FALSE	NA	FALSE	NA	NA	Cytosol;Plasma membrane		FALSE
hnrnpa3	ahnak	ahnak_hnrnpa3	0.346536	6.26341e-06	0.000119871	NA	NA	FALSE	NA	FALSE	NA	Nucleoplasm;Nucleus	Cytosol;Plasma membrane		FALSE
arcn1	ahnak	ahnak_arcn1	0.451273	1.67212e-09	1.02879e-07	NA	NA	FALSE	NA	FALSE	NA	Golgi apparatus;Cytoplasm;Vesicles	Cytosol;Plasma membrane		FALSE
gnai2	ahnak	ahnak_gnai2	0.515397	2.25383e-12	3.00834e-10	NA	NA	FALSE	NA	FALSE	NA	Cytosol;Plasma membrane	Cytosol;Plasma membrane	Cytosol;Plasma membrane	TRUE
tpm4	ahnak	ahnak_tpm4	0.487766	4.60304e-11	4.36887e-09	NA	NA	FALSE	NA	FALSE	219	Actin filaments;Cytoskeleton	Cytosol;Plasma membrane		FALSE
btf3	ahnak	ahnak_btf3	0.315797	4.24791e-05	0.000585521	NA	NA	FALSE	NA	FALSE	NA	Cytosol	Cytosol;Plasma membrane	Cytosol	TRUE
sars	ahnak	ahnak_sars	0.312318	5.20867e-05	0.000691864	NA	NA	FALSE	NA	FALSE	NA	Cytosol	Cytosol;Plasma membrane	Cytosol	TRUE
tardbp	ahnak	ahnak_tardbp	0.382433	5.11025e-07	1.44472e-05	NA	NA	FALSE	NA	FALSE	NA	Nucleoplasm;Nucleus	Cytosol;Plasma membrane		FALSE
ptbp1	ahnak	ahnak_ptbp1	0.408536	6.77926e-08	2.56009e-06	NA	NA	FALSE	NA	FALSE	NA	Nucleoplasm;Nucleus	Cytosol;Plasma membrane		FALSE
hmgb1	ahnak	ahnak_hmgb1	0.505408	6.92116e-12	8.16383e-10	NA	NA	FALSE	NA	FALSE	NA	Nucleus	Cytosol;Plasma membrane		FALSE
pacsin2	ahnak	ahnak_pacsin2	0.345503	6.70183e-06	0.00012687	NA	NA	FALSE	NA	FALSE	NA	Nuclear speckles;Nucleoplasm;Nucleus;Vesicles;Cytosol	Cytosol;Plasma membrane	Cytosol	TRUE
npm1	ahnak	ahnak_npm1	0.512348	3.18656e-12	4.09718e-10	NA	NA	FALSE	NA	FALSE	NA	Nucleus;Nucleoli	Cytosol;Plasma membrane		FALSE
scp2	ahnak	ahnak_scp2	0.314894	4.47979e-05	0.000611619	NA	NA	FALSE	NA	FALSE	NA	Vesicles	Cytosol;Plasma membrane		FALSE
vat1	ahnak	ahnak_vat1	0.500822	1.14445e-11	1.27492e-09	NA	NA	FALSE	NA	FALSE	NA	NA	Cytosol;Plasma membrane		FALSE
bcap31	ahnak	ahnak_bcap31	0.322597	2.83059e-05	0.000419467	NA	NA	FALSE	NA	FALSE	NA	Endoplasmic reticulum;Cytoplasm	Cytosol;Plasma membrane		FALSE
mlec	ahnak	ahnak_mlec	0.373305	9.94898e-07	2.54504e-05	NA	NA	FALSE	NA	FALSE	NA	NA	Cytosol;Plasma membrane		FALSE
ppib	ahnak	ahnak_ppib	0.557224	1.34966e-14	3.08654e-12	NA	NA	FALSE	NA	FALSE	NA	Endoplasmic reticulum;Cytoplasm	Cytosol;Plasma membrane		FALSE
pak2	ahnak	ahnak_pak2	0.382101	5.23742e-07	1.47528e-05	NA	NA	FALSE	NA	FALSE	NA	Nucleus;Vesicles	Cytosol;Plasma membrane		FALSE
hnrnpul2	ahnak	ahnak_hnrnpul2	0.30536	7.77274e-05	0.00095927	NA	NA	FALSE	NA	FALSE	187	Nucleoplasm;Nucleus	Cytosol;Plasma membrane		FALSE
h4c8	ahnak	ahnak_h4c8	0.484352	6.55991e-11	5.97232e-09	NA	NA	FALSE	NA	FALSE	NA	NA	Cytosol;Plasma membrane		FALSE
h4c14	ahnak	ahnak_h4c14	0.484352	6.55991e-11	5.97232e-09	NA	NA	FALSE	NA	FALSE	NA	NA	Cytosol;Plasma membrane		FALSE
h4c3	ahnak	ahnak_h4c3	0.484352	6.55991e-11	5.97232e-09	NA	NA	FALSE	NA	FALSE	NA	NA	Cytosol;Plasma membrane		FALSE
h4c4	ahnak	ahnak_h4c4	0.484352	6.55991e-11	5.97232e-09	NA	NA	FALSE	NA	FALSE	NA	NA	Cytosol;Plasma membrane		FALSE
h4c6	ahnak	ahnak_h4c6	0.484352	6.55991e-11	5.97232e-09	NA	NA	FALSE	NA	FALSE	NA	NA	Cytosol;Plasma membrane		FALSE
h4c9	ahnak	ahnak_h4c9	0.484352	6.55991e-11	5.97232e-09	NA	NA	FALSE	NA	FALSE	NA	NA	Cytosol;Plasma membrane		FALSE
h4c11	ahnak	ahnak_h4c11	0.484352	6.55991e-11	5.97232e-09	NA	NA	FALSE	NA	FALSE	NA	NA	Cytosol;Plasma membrane		FALSE
h4c12	ahnak	ahnak_h4c12	0.484352	6.55991e-11	5.97232e-09	NA	NA	FALSE	NA	FALSE	NA	NA	Cytosol;Plasma membrane		FALSE
hist1h4n	ahnak	ahnak_hist1h4n	0.484352	6.55991e-11	5.97232e-09	NA	NA	FALSE	NA	FALSE	NA	NA	Cytosol;Plasma membrane		FALSE
h4f16	ahnak	ahnak_h4f16	0.484352	6.55991e-11	5.97232e-09	NA	NA	FALSE	NA	FALSE	NA	NA	Cytosol;Plasma membrane		FALSE
h4c1	ahnak	ahnak_h4c1	0.484352	6.55991e-11	5.97232e-09	NA	NA	FALSE	NA	FALSE	NA	NA	Cytosol;Plasma membrane		FALSE
h4c2	ahnak	ahnak_h4c2	0.484352	6.55991e-11	5.97232e-09	NA	NA	FALSE	NA	FALSE	NA	NA	Cytosol;Plasma membrane		FALSE
hist1h4m	ahnak	ahnak_hist1h4m	0.484352	6.55991e-11	5.97232e-09	NA	NA	FALSE	NA	FALSE	NA	NA	Cytosol;Plasma membrane		FALSE
tmem43	ahnak	ahnak_tmem43	0.384022	4.54139e-07	1.30695e-05	NA	NA	FALSE	NA	FALSE	NA	NA	Cytosol;Plasma membrane		FALSE
gc	ahnak	ahnak_gc	0.327913	2.04684e-05	0.000320939	NA	NA	FALSE	NA	FALSE	NA	NA	Cytosol;Plasma membrane		FALSE
rab1a	ahnak	ahnak_rab1a	0.31801	3.72612e-05	0.00052597	NA	NA	FALSE	NA	FALSE	NA	Endoplasmic reticulum;Cytoplasm;Cytosol	Cytosol;Plasma membrane	Cytosol	TRUE
col3a1	ahnak	ahnak_col3a1	0.387431	3.51787e-07	1.05083e-05	NA	NA	FALSE	NA	FALSE	NA	NA	Cytosol;Plasma membrane		FALSE
hnrnpab	ahnak	ahnak_hnrnpab	0.458412	8.55734e-10	5.72493e-08	NA	NA	FALSE	NA	FALSE	406	Nucleoplasm;Nucleus	Cytosol;Plasma membrane		FALSE
rplp2	ahnak	ahnak_rplp2	0.622977	8.60976e-19	4.91924e-16	NA	NA	FALSE	NA	FALSE	NA	NA	Cytosol;Plasma membrane		FALSE
eif3f	ahnak	ahnak_eif3f	0.356968	3.11877e-06	6.68124e-05	NA	NA	FALSE	NA	FALSE	NA	Nucleoli;Nucleus	Cytosol;Plasma membrane		FALSE
serping1	ahnak	ahnak_serping1	0.368867	1.36548e-06	3.32804e-05	NA	NA	FALSE	NA	FALSE	414	NA	Cytosol;Plasma membrane		FALSE
hp1bp3	ahnak	ahnak_hp1bp3	0.396618	1.74215e-07	5.75904e-06	NA	NA	FALSE	NA	FALSE	NA	Nuclear speckles;Nucleoplasm;Nucleus	Cytosol;Plasma membrane		FALSE
anxa4	ahnak	ahnak_anxa4	0.32941	1.86621e-05	0.000297319	NA	NA	FALSE	NA	FALSE	632	Cytosol	Cytosol;Plasma membrane	Cytosol	TRUE
tppp3	ahnak	ahnak_tppp3	0.481472	8.81889e-11	7.75181e-09	NA	NA	FALSE	NA	FALSE	NA	Nucleoli;Nucleus (Fibrillar center)	Cytosol;Plasma membrane		FALSE
rps8	ahnak	ahnak_rps8	0.305	7.93332e-05	0.000975372	NA	NA	FALSE	NA	FALSE	NA	Endoplasmic reticulum;Cytoplasm;Cytosol	Cytosol;Plasma membrane	Cytosol	TRUE
lrrc59	ahnak	ahnak_lrrc59	0.383409	4.75335e-07	1.35887e-05	NA	NA	FALSE	NA	FALSE	NA	Endoplasmic reticulum;Cytoplasm	Cytosol;Plasma membrane		FALSE
prpf19	ahnak	ahnak_prpf19	0.453028	1.42024e-09	8.91953e-08	NA	NA	FALSE	NA	FALSE	NA	Nuclear speckles;Nucleoplasm;Nucleus	Cytosol;Plasma membrane		FALSE
obscn	flnc	flnc_obscn	0.355573	3.42858e-06	7.2345e-05	NA	NA	FALSE	NA	FALSE	516	Cytosol;Plasma membrane	Cytosol;Plasma membrane	Cytosol;Plasma membrane	TRUE
obscn	flnc	flnc_obscn	0.355573	3.42858e-06	7.2345e-05	NA	NA	FALSE	NA	FALSE	516	Cytosol;Plasma membrane	Cytosol;Plasma membrane	Cytosol;Plasma membrane	TRUE
myh7	flnc	flnc_myh7	0.43041	1.08655e-08	5.26196e-07	NA	NA	FALSE	NA	FALSE	544	NA	Cytosol;Plasma membrane		FALSE
hspa4	flnc	flnc_hspa4	0.400802	1.25599e-07	4.34864e-06	NA	NA	FALSE	NA	FALSE	181	Nucleoplasm;Nucleus;Cytosol	Cytosol;Plasma membrane	Cytosol	TRUE
ktn1	flnc	flnc_ktn1	0.3165	4.075e-05	0.000565862	NA	NA	FALSE	NA	FALSE	153	Endoplasmic reticulum;Cytoplasm	Cytosol;Plasma membrane		FALSE
g3bp1	flnc	flnc_g3bp1	0.31851	3.61703e-05	0.000513269	NA	NA	FALSE	NA	FALSE	NA	Cytosol	Cytosol;Plasma membrane	Cytosol	TRUE
tfrc	flnc	flnc_tfrc	0.345612	6.65452e-06	0.000126109	NA	NA	FALSE	NA	FALSE	NA	Vesicles	Cytosol;Plasma membrane		FALSE
cryab	flnc	cryab_flnc	0.47854	1.18854e-10	1.00935e-08	NA	NA	FALSE	NA	FALSE	629	Cytosol;Plasma membrane	Cytosol;Plasma membrane	Cytosol;Plasma membrane	TRUE
rplp0	flnc	flnc_rplp0	0.302675	9.04716e-05	0.00108566	NA	NA	FALSE	NA	FALSE	NA	Endoplasmic reticulum;Cytoplasm;Cytosol	Cytosol;Plasma membrane	Cytosol	TRUE
pcbp2	flnc	flnc_pcbp2	0.321147	3.08907e-05	0.000450816	NA	NA	FALSE	NA	FALSE	292	Nucleoplasm;Nucleus	Cytosol;Plasma membrane		FALSE
rab18	flnc	flnc_rab18	0.383878	4.59026e-07	1.31901e-05	NA	NA	FALSE	NA	FALSE	NA	NA	Cytosol;Plasma membrane		FALSE
prune1	flnc	flnc_prune1	0.328921	1.92356e-05	0.000304808	NA	NA	FALSE	NA	FALSE	NA	NA	Cytosol;Plasma membrane		FALSE
slmap	flnc	flnc_slmap	0.491782	3.01878e-11	3.00997e-09	NA	NA	FALSE	NA	FALSE	233	Endoplasmic reticulum;Cytoplasm	Cytosol;Plasma membrane		FALSE
atp1b1	flnc	atp1b1_flnc	0.384015	4.54361e-07	1.30751e-05	NA	NA	FALSE	NA	FALSE	NA	NA	Cytosol;Plasma membrane		FALSE
hspb1	flnc	flnc_hspb1	0.493005	2.65181e-11	2.68229e-09	NA	NA	FALSE	NA	FALSE	240	Cytosol;Plasma membrane	Cytosol;Plasma membrane	Cytosol;Plasma membrane	TRUE
ppm1b	flnc	flnc_ppm1b	0.351089	4.63398e-06	9.31793e-05	NA	NA	FALSE	NA	FALSE	NA	Nucleoli;Nucleus;Cytosol	Cytosol;Plasma membrane	Cytosol	TRUE
arl3	flnc	arl3_flnc	0.444462	3.12372e-09	1.77614e-07	NA	NA	FALSE	NA	FALSE	NA	Centrosome	Cytosol;Plasma membrane		FALSE
tppp3	flnc	flnc_tppp3	0.307374	6.9295e-05	0.000873392	NA	NA	FALSE	NA	FALSE	NA	Nucleoli;Nucleus (Fibrillar center)	Cytosol;Plasma membrane		FALSE
drg1	flnc	drg1_flnc	0.344179	7.30709e-06	0.000136351	NA	NA	FALSE	NA	FALSE	NA	Nuclear bodies;Nucleoplasm;Nucleus;Cytosol	Cytosol;Plasma membrane	Cytosol	TRUE
rpl30	flnc	flnc_rpl30	0.314635	4.54862e-05	0.00061929	NA	NA	FALSE	NA	FALSE	NA	Endoplasmic reticulum;Cytoplasm;Cytosol	Cytosol;Plasma membrane	Cytosol	TRUE
sgcd	flnc	flnc_sgcd	0.373977	9.47913e-07	2.44261e-05	NA	NA	FALSE	NA	FALSE	634	NA	Cytosol;Plasma membrane		FALSE
sccpdh	flnc	flnc_sccpdh	0.34449	7.16032e-06	0.000134055	NA	NA	FALSE	NA	FALSE	NA	Vesicles	Cytosol;Plasma membrane		FALSE
msi2	flnc	flnc_msi2	0.47817	1.23385e-10	1.04305e-08	NA	NA	FALSE	NA	FALSE	NA	Cytosol	Cytosol;Plasma membrane	Cytosol	TRUE
rpl32	flnc	flnc_rpl32	0.30351	8.63145e-05	0.00104482	NA	NA	FALSE	NA	FALSE	NA	Endoplasmic reticulum;Cytoplasm;Cytosol	Cytosol;Plasma membrane	Cytosol	TRUE
neb	dmd	dmd_neb	0.581972	4.58741e-16	1.46201e-13	NA	NA	FALSE	NA	FALSE	956	NA	NA		FALSE
obscn	dmd	dmd_obscn	0.373021	1.01537e-06	2.58943e-05	NA	NA	FALSE	NA	FALSE	507	Cytosol;Plasma membrane	NA		FALSE
obscn	dmd	dmd_obscn	0.373021	1.01537e-06	2.58943e-05	NA	NA	FALSE	NA	FALSE	507	Cytosol;Plasma membrane	NA		FALSE
flnc	dmd	dmd_flnc	0.358312	2.84569e-06	6.18472e-05	NA	NA	FALSE	NA	FALSE	293	Cytosol;Plasma membrane	NA		FALSE
ugp2	dmd	dmd_ugp2	0.381831	5.34302e-07	1.50048e-05	NA	NA	FALSE	NA	FALSE	NA	Centrosome;Mitochondria;Cytoplasm	NA		FALSE
pgm2	dmd	dmd_pgm2	0.510514	3.91837e-12	4.92348e-10	NA	NA	FALSE	NA	FALSE	NA	Intermediate filaments	NA		FALSE
anxa6	dmd	anxa6_dmd	0.331081	1.68238e-05	0.000272903	NA	NA	FALSE	NA	FALSE	250	Nuclear speckles;Nucleoplasm;Nucleus	NA		FALSE
anxa6	dmd	anxa6_dmd	0.331081	1.68238e-05	0.000272903	NA	NA	FALSE	NA	FALSE	250	Nuclear speckles;Nucleoplasm;Nucleus	NA		FALSE
lamc1	dmd	dmd_lamc1	0.468166	3.34045e-10	2.5064e-08	NA	NA	FALSE	NA	FALSE	927	Endoplasmic reticulum;Cytoplasm;Plasma membrane	NA		FALSE
gpi1	dmd	dmd_gpi1	0.583543	3.66489e-16	1.19335e-13	NA	NA	FALSE	NA	FALSE	NA	NA	NA		FALSE
lamb1	dmd	dmd_lamb1	0.468578	3.20839e-10	2.41993e-08	NA	NA	FALSE	NA	FALSE	928	NA	NA		FALSE
mylpf	dmd	dmd_mylpf	0.513684	2.73926e-12	3.58008e-10	NA	NA	FALSE	NA	FALSE	322	NA	NA		FALSE
hk2	dmd	dmd_hk2	0.407001	7.67151e-08	2.84758e-06	NA	NA	FALSE	NA	FALSE	NA	NA	NA		FALSE
ecpas	dmd	dmd_ecpas	0.301069	9.89997e-05	0.00116818	NA	NA	FALSE	NA	FALSE	NA	NA	NA		FALSE
lrpprc	dmd	dmd_lrpprc	0.327367	2.11676e-05	0.000329954	NA	NA	FALSE	NA	FALSE	NA	Mitochondria;Cytoplasm	NA		FALSE
pvalb	dmd	dmd_pvalb	0.385985	3.92166e-07	1.15325e-05	NA	NA	FALSE	NA	FALSE	323	Nucleoplasm;Nucleus	NA		FALSE
mypn	dmd	dmd_mypn	0.318463	3.62715e-05	0.000514454	NA	NA	FALSE	NA	FALSE	233	Nucleus;Vesicles	NA		FALSE
phkb	dmd	dmd_phkb	0.418864	2.90281e-08	1.23246e-06	NA	NA	FALSE	NA	FALSE	NA	Golgi apparatus;Cytoplasm	NA		FALSE
map2k1	dmd	dmd_map2k1	0.324921	2.45844e-05	0.000373394	NA	NA	FALSE	NA	FALSE	NA	Cytosol;Plasma membrane	NA		FALSE
slc12a2	dmd	dmd_slc12a2	0.305541	7.69345e-05	0.000951238	NA	NA	FALSE	NA	FALSE	NA	Vesicles	NA		FALSE
cops3	dmd	cops3_dmd	0.426743	1.49048e-08	6.92144e-07	NA	NA	FALSE	NA	FALSE	NA	Nucleus	NA		FALSE
gpd1l	dmd	dmd_gpd1l	0.314227	4.65883e-05	0.000631578	NA	NA	FALSE	NA	FALSE	NA	NA	NA		FALSE
rab18	dmd	dmd_rab18	0.473882	1.89835e-10	1.52531e-08	NA	NA	FALSE	NA	FALSE	NA	NA	NA		FALSE
ndufa12	dmd	dmd_ndufa12	0.314641	4.5469e-05	0.000619101	NA	NA	FALSE	NA	FALSE	NA	Mitochondria;Cytoplasm	NA		FALSE
rabggta	dmd	dmd_rabggta	0.313609	4.83049e-05	0.000650502	NA	NA	FALSE	NA	FALSE	NA	Nucleoplasm;Nucleus	NA		FALSE
macrod1	dmd	dmd_macrod1	0.403935	9.80221e-08	3.51436e-06	NA	NA	FALSE	NA	FALSE	NA	Nucleoplasm;Nucleus	NA		FALSE
cobl	dmd	cobl_dmd	0.412044	5.09839e-08	2.00278e-06	NA	NA	FALSE	NA	FALSE	NA	Cell Junctions;Plasma membrane	NA		FALSE
prune1	dmd	dmd_prune1	0.403898	9.8312e-08	3.52343e-06	NA	NA	FALSE	NA	FALSE	NA	NA	NA		FALSE
phykpl	dmd	dmd_phykpl	0.34072	9.1407e-06	0.000164372	NA	NA	FALSE	NA	FALSE	NA	Mitochondria;Cytoplasm	NA		FALSE
cab39	dmd	cab39_dmd	0.55519	1.7603e-14	3.92027e-12	NA	NA	FALSE	NA	FALSE	NA	Nucleoli;Nucleus	NA		FALSE
map2k4	dmd	dmd_map2k4	0.545431	6.14172e-14	1.20507e-11	NA	NA	FALSE	NA	FALSE	NA	Nucleoplasm;Nucleus	NA		FALSE
lactb	dmd	dmd_lactb	0.350091	4.95258e-06	9.84893e-05	NA	NA	FALSE	NA	FALSE	NA	Mitochondria;Cytoplasm	NA		FALSE
prdx2	dmd	dmd_prdx2	0.348915	5.35411e-06	0.000105114	NA	NA	FALSE	NA	FALSE	NA	NA	NA		FALSE
sar1a	dmd	dmd_sar1a	0.625579	5.60199e-19	3.32641e-16	NA	NA	FALSE	NA	FALSE	NA	Endoplasmic reticulum;Cytoplasm	NA		FALSE
atp1b1	dmd	atp1b1_dmd	0.329046	1.90873e-05	0.000302866	NA	NA	FALSE	NA	FALSE	NA	NA	NA		FALSE
uba3	dmd	dmd_uba3	0.363598	1.97658e-06	4.54966e-05	NA	NA	FALSE	NA	FALSE	NA	Cytosol;Plasma membrane	NA		FALSE
cpped1	dmd	cpped1_dmd	0.329041	1.9093e-05	0.000302936	NA	NA	FALSE	NA	FALSE	NA	Cytosol	NA		FALSE
itpa	dmd	dmd_itpa	0.417039	3.37926e-08	1.40504e-06	NA	NA	FALSE	NA	FALSE	NA	Cytosol	NA		FALSE
chchd3	dmd	chchd3_dmd	0.397626	1.61082e-07	5.38502e-06	NA	NA	FALSE	NA	FALSE	NA	Mitochondria;Cytoplasm	NA		FALSE
pura	dmd	dmd_pura	0.426985	1.45988e-08	6.79777e-07	NA	NA	FALSE	NA	FALSE	NA	NA	NA		FALSE
gsto1	dmd	dmd_gsto1	0.309562	6.11082e-05	0.00078826	NA	NA	FALSE	NA	FALSE	NA	NA	NA		FALSE
ablim2	dmd	ablim2_dmd	0.313495	4.86298e-05	0.000654112	NA	NA	FALSE	NA	FALSE	NA	Mitochondria;Cytoplasm	NA		FALSE
psmb5	dmd	dmd_psmb5	0.317519	3.83637e-05	0.000538534	NA	NA	FALSE	NA	FALSE	NA	Nucleus;Centrosome	NA		FALSE
mlec	dmd	dmd_mlec	0.535288	2.15814e-13	3.71454e-11	NA	NA	FALSE	NA	FALSE	NA	NA	NA		FALSE
hdhd2	dmd	dmd_hdhd2	0.431356	1.00092e-08	4.90063e-07	NA	NA	FALSE	NA	FALSE	NA	Vesicles	NA		FALSE
ubac1	dmd	dmd_ubac1	0.403012	1.05483e-07	3.74386e-06	NA	NA	FALSE	NA	FALSE	NA	Cytosol;Plasma membrane	NA		FALSE
sgcb	dmd	dmd_sgcb	0.481831	8.50091e-11	7.50332e-09	NA	NA	FALSE	NA	FALSE	979	Cytosol	NA		FALSE
hhatl	dmd	dmd_hhatl	0.333962	1.40501e-05	0.000234982	NA	NA	FALSE	NA	FALSE	NA	NA	NA		FALSE
ykt6	dmd	dmd_ykt6	0.437416	5.87771e-09	3.08256e-07	NA	NA	FALSE	NA	FALSE	NA	Cytosol	NA		FALSE
otub1	dmd	dmd_otub1	0.502485	9.54474e-12	1.08576e-09	NA	NA	FALSE	NA	FALSE	NA	Nucleus;Cytosol	NA		FALSE
mapre2	dmd	dmd_mapre2	0.330486	1.74585e-05	0.000281383	NA	NA	FALSE	NA	FALSE	311	Nucleoplasm;Nucleus	NA		FALSE
cisd1	dmd	cisd1_dmd	0.472321	2.21749e-10	1.7487e-08	NA	NA	FALSE	NA	FALSE	NA	Mitochondria;Cytoplasm	NA		FALSE
prkag1	dmd	dmd_prkag1	0.489742	3.74269e-11	3.63917e-09	NA	NA	FALSE	NA	FALSE	NA	Nucleoplasm;Nucleus;Cytosol	NA		FALSE
kyat1	dmd	dmd_kyat1	0.353044	4.06607e-06	8.34827e-05	NA	NA	FALSE	NA	FALSE	NA	NA	NA		FALSE
nae1	dmd	dmd_nae1	0.415562	3.8189e-08	1.56155e-06	NA	NA	FALSE	NA	FALSE	NA	Nucleus	NA		FALSE
preb	dmd	dmd_preb	0.378973	6.59391e-07	1.79471e-05	NA	NA	FALSE	NA	FALSE	NA	Endoplasmic reticulum;Cytoplasm	NA		FALSE
crot	dmd	crot_dmd	0.57614	1.0443e-15	3.07236e-13	NA	NA	FALSE	NA	FALSE	NA	Vesicles	NA		FALSE
sun1	dmd	dmd_sun1	0.541778	9.70402e-14	1.81752e-11	NA	NA	FALSE	NA	FALSE	330	Nuclear membrane;Nucleus	NA		FALSE
sypl2	dmd	dmd_sypl2	0.364029	1.91809e-06	4.43555e-05	NA	NA	FALSE	NA	FALSE	277	Nucleoplasm;Nucleus	NA		FALSE
mdp1	dmd	dmd_mdp1	0.322994	2.76348e-05	0.000411255	NA	NA	FALSE	NA	FALSE	NA	Nucleoplasm;Nucleus	NA		FALSE
psma4	dmd	dmd_psma4	0.391468	2.58998e-07	8.09086e-06	NA	NA	FALSE	NA	FALSE	NA	Nucleus;Cytosol	NA		FALSE
arih1	dmd	arih1_dmd	0.411618	5.27882e-08	2.06356e-06	NA	NA	FALSE	NA	FALSE	NA	Golgi apparatus;Cytoplasm	NA		FALSE
ube2l3	dmd	dmd_ube2l3	0.444766	3.03872e-09	1.7339e-07	NA	NA	FALSE	NA	FALSE	NA	Nucleus;Cytosol	NA		FALSE
vapa	dmd	dmd_vapa	0.387625	3.46674e-07	1.03771e-05	NA	NA	FALSE	NA	FALSE	NA	Endoplasmic reticulum;Cytoplasm	NA		FALSE
epm2aip1	dmd	dmd_epm2aip1	0.330762	1.71614e-05	0.000277439	NA	NA	FALSE	NA	FALSE	NA	NA	NA		FALSE
pter	dmd	dmd_pter	0.327402	2.11224e-05	0.000329382	NA	NA	FALSE	NA	FALSE	214	Nucleoplasm;Nucleus	NA		FALSE
prkar1a	dmd	dmd_prkar1a	0.329718	1.83098e-05	0.000292664	NA	NA	FALSE	NA	FALSE	NA	Cytosol	NA		FALSE
prkcq	dmd	dmd_prkcq	0.431729	9.68884e-09	4.76392e-07	NA	NA	FALSE	NA	FALSE	NA	Microtubule organizing center;Cytoskeleton	NA		FALSE
rab5b	dmd	dmd_rab5b	0.31378	4.78249e-05	0.000645206	NA	NA	FALSE	NA	FALSE	NA	Vesicles	NA		FALSE
cdc42	dmd	cdc42_dmd	0.333138	1.47954e-05	0.000245366	NA	NA	FALSE	NA	FALSE	923	Microtubules	NA		FALSE
sgcd	dmd	dmd_sgcd	0.807596	1.56955e-38	2.26272e-34	NA	NA	FALSE	NA	FALSE	986	NA	NA		FALSE
prmt1	dmd	dmd_prmt1	0.505228	7.06018e-12	8.30867e-10	NA	NA	FALSE	NA	FALSE	NA	Nucleoplasm;Nucleus	NA		FALSE
rac1	dmd	dmd_rac1	0.352464	4.22719e-06	8.62469e-05	NA	NA	FALSE	NA	FALSE	910	Nucleus;Cytosol	NA		FALSE
psmb7	dmd	dmd_psmb7	0.32304	2.75573e-05	0.000410321	NA	NA	FALSE	NA	FALSE	NA	Nucleoplasm;Nucleus	NA		FALSE
tatdn1	dmd	dmd_tatdn1	0.408916	6.57405e-08	2.49282e-06	NA	NA	FALSE	NA	FALSE	NA	Nucleoplasm;Nucleus	NA		FALSE
nutf2	dmd	dmd_nutf2	0.583381	3.7512e-16	1.21839e-13	NA	NA	FALSE	NA	FALSE	NA	Microtubules	NA		FALSE
fnta	dmd	dmd_fnta	0.542644	8.71094e-14	1.64986e-11	NA	NA	FALSE	NA	FALSE	NA	Cytosol	NA		FALSE
psma3	dmd	dmd_psma3	0.328025	2.03277e-05	0.000319124	NA	NA	FALSE	NA	FALSE	NA	NA	NA		FALSE
msi2	dmd	dmd_msi2	0.313631	4.82433e-05	0.000649826	NA	NA	FALSE	NA	FALSE	NA	Cytosol	NA		FALSE
eml2	dmd	dmd_eml2	0.416667	3.48494e-08	1.44297e-06	NA	NA	FALSE	NA	FALSE	360	Vesicles	NA		FALSE
clic5	dmd	clic5_dmd	0.407686	7.26005e-08	2.71552e-06	NA	NA	FALSE	NA	FALSE	NA	Plasma membrane	NA		FALSE
lypla1	dmd	dmd_lypla1	0.385653	4.02046e-07	1.17804e-05	NA	NA	FALSE	NA	FALSE	NA	Cytosol	NA		FALSE
prps1l3	dmd	dmd_prps1l3	0.418637	2.95821e-08	1.25281e-06	NA	NA	FALSE	NA	FALSE	NA	NA	NA		FALSE
tcap	dmd	dmd_tcap	0.412766	4.80631e-08	1.90345e-06	NA	NA	FALSE	NA	FALSE	954	NA	NA		FALSE
faf1	dmd	dmd_faf1	0.411622	5.27709e-08	2.06298e-06	NA	NA	FALSE	NA	FALSE	NA	Nucleus	NA		FALSE
psmd8	dmd	dmd_psmd8	0.316474	4.08144e-05	0.000566596	NA	NA	FALSE	NA	FALSE	NA	Cytosol	NA		FALSE
ube2n	dmd	dmd_ube2n	0.472235	2.2365e-10	1.76181e-08	NA	NA	FALSE	NA	FALSE	NA	Nucleus	NA		FALSE
rrm1	dmd	dmd_rrm1	0.31573	4.26477e-05	0.000587414	NA	NA	FALSE	NA	FALSE	NA	Cytosol	NA		FALSE
pfn2	dmd	dmd_pfn2	0.315092	4.42789e-05	0.000605846	NA	NA	FALSE	NA	FALSE	NA	NA	NA		FALSE
arl6ip5	dmd	arl6ip5_dmd	0.379713	6.24578e-07	1.71393e-05	NA	NA	FALSE	NA	FALSE	NA	Endoplasmic reticulum;Cytoplasm	NA		FALSE
ndufs4	dmd	dmd_ndufs4	0.305728	7.61191e-05	0.000943072	NA	NA	FALSE	NA	FALSE	NA	Mitochondria;Cytoplasm	NA		FALSE
asph	dmd	asph_dmd	0.561056	8.14245e-15	1.95853e-12	NA	NA	FALSE	NA	FALSE	NA	Endoplasmic reticulum;Cytoplasm	NA		FALSE
asph	dmd	asph_dmd	0.561056	8.14245e-15	1.95853e-12	NA	NA	FALSE	NA	FALSE	NA	Endoplasmic reticulum;Cytoplasm	NA		FALSE
asph	dmd	asph_dmd	0.561056	8.14245e-15	1.95853e-12	NA	NA	FALSE	NA	FALSE	NA	Endoplasmic reticulum;Cytoplasm	NA		FALSE
tecr	dmd	dmd_tecr	0.499207	1.36387e-11	1.48874e-09	NA	NA	FALSE	NA	FALSE	NA	Endoplasmic reticulum;Cytoplasm	NA		FALSE
zmpste24	dmd	dmd_zmpste24	0.392812	2.33687e-07	7.4085e-06	NA	NA	FALSE	NA	FALSE	255	Cytosol	NA		FALSE
neb	myom1	myom1_neb	0.800574	2.04053e-37	2.5769e-33	NA	NA	FALSE	NA	FALSE	414	NA	NA		FALSE
dmd	myom1	dmd_myom1	0.624027	7.24255e-19	4.20331e-16	NA	NA	FALSE	NA	FALSE	366	NA	NA		FALSE
ugp2	myom1	myom1_ugp2	0.581739	4.74172e-16	1.50577e-13	NA	NA	FALSE	NA	FALSE	NA	Centrosome;Mitochondria;Cytoplasm	NA		FALSE
gpd2	myom1	gpd2_myom1	0.578207	7.8164e-16	2.36556e-13	NA	NA	FALSE	NA	FALSE	185	NA	NA		FALSE
fh1	myom1	fh1_myom1	0.334441	1.36324e-05	0.000229156	NA	NA	FALSE	NA	FALSE	NA	NA	NA		FALSE
pgm2	myom1	myom1_pgm2	0.773472	1.67779e-33	1.18616e-29	NA	NA	FALSE	NA	FALSE	NA	Intermediate filaments	NA		FALSE
anxa6	myom1	anxa6_myom1	0.373323	9.93579e-07	2.54227e-05	NA	NA	FALSE	NA	FALSE	NA	Nuclear speckles;Nucleoplasm;Nucleus	NA		FALSE
anxa6	myom1	anxa6_myom1	0.373323	9.93579e-07	2.54227e-05	NA	NA	FALSE	NA	FALSE	NA	Nuclear speckles;Nucleoplasm;Nucleus	NA		FALSE
lamc1	myom1	lamc1_myom1	0.347408	5.91439e-06	0.000114261	NA	NA	FALSE	NA	FALSE	NA	Endoplasmic reticulum;Cytoplasm;Plasma membrane	NA		FALSE
immt	myom1	immt_myom1	0.315881	4.22691e-05	0.000583117	NA	NA	FALSE	NA	FALSE	NA	Mitochondria;Cytoplasm	NA		FALSE
gpi1	myom1	gpi1_myom1	0.652699	4.93109e-21	4.3759e-18	NA	NA	FALSE	NA	FALSE	NA	NA	NA		FALSE
mylpf	myom1	mylpf_myom1	0.636022	9.57137e-20	6.60338e-17	NA	NA	FALSE	NA	FALSE	844	NA	NA		FALSE
hk2	myom1	hk2_myom1	0.424226	1.84768e-08	8.33567e-07	NA	NA	FALSE	NA	FALSE	NA	NA	NA		FALSE
lrpprc	myom1	lrpprc_myom1	0.357001	3.11197e-06	6.66887e-05	NA	NA	FALSE	NA	FALSE	NA	Mitochondria;Cytoplasm	NA		FALSE
pvalb	myom1	myom1_pvalb	0.400274	1.30928e-07	4.50597e-06	NA	NA	FALSE	NA	FALSE	278	Nucleoplasm;Nucleus	NA		FALSE
aldoart1	myom1	aldoart1_myom1	0.400628	1.27334e-07	4.40017e-06	NA	NA	FALSE	NA	FALSE	NA	NA	NA		FALSE
phkb	myom1	myom1_phkb	0.672554	1.12167e-22	1.34636e-19	NA	NA	FALSE	NA	FALSE	NA	Golgi apparatus;Cytoplasm	NA		FALSE
oxct1	myom1	myom1_oxct1	0.413984	4.34927e-08	1.74637e-06	NA	NA	FALSE	NA	FALSE	NA	Mitochondria;Cytoplasm	NA		FALSE
adssl1	myom1	adssl1_myom1	0.774641	1.1674e-33	8.49158e-30	NA	NA	FALSE	NA	FALSE	NA	NA	NA		FALSE
sugt1	myom1	myom1_sugt1	0.380097	6.07172e-07	1.67297e-05	NA	NA	FALSE	NA	FALSE	NA	Nucleoplasm;Nucleus;Cytosol	NA		FALSE
ppp5c	myom1	myom1_ppp5c	0.345153	6.85715e-06	0.000129325	NA	NA	FALSE	NA	FALSE	NA	Vesicles;Cytosol	NA		FALSE
map2k1	myom1	map2k1_myom1	0.310199	5.89037e-05	0.000765027	NA	NA	FALSE	NA	FALSE	NA	Cytosol;Plasma membrane	NA		FALSE
mtap	myom1	mtap_myom1	0.331877	1.60099e-05	0.00026195	NA	NA	FALSE	NA	FALSE	NA	Cytosol	NA		FALSE
cops3	myom1	cops3_myom1	0.486594	5.20074e-11	4.86567e-09	NA	NA	FALSE	NA	FALSE	NA	Nucleus	NA		FALSE
l2hgdh	myom1	l2hgdh_myom1	0.356125	3.30269e-06	7.01103e-05	NA	NA	FALSE	NA	FALSE	NA	Mitochondria;Cytoplasm	NA		FALSE
gpd1l	myom1	gpd1l_myom1	0.353154	4.03597e-06	8.29661e-05	NA	NA	FALSE	NA	FALSE	NA	NA	NA		FALSE
rab18	myom1	myom1_rab18	0.382651	5.02831e-07	1.42491e-05	NA	NA	FALSE	NA	FALSE	NA	NA	NA		FALSE
gps1	myom1	gps1_myom1	0.318756	3.56444e-05	0.000507116	NA	NA	FALSE	NA	FALSE	NA	NA	NA		FALSE
ndufa12	myom1	myom1_ndufa12	0.39665	1.73777e-07	5.74665e-06	NA	NA	FALSE	NA	FALSE	NA	Mitochondria;Cytoplasm	NA		FALSE
ddx19a	myom1	ddx19a_myom1	0.35406	3.79734e-06	7.88315e-05	NA	NA	FALSE	NA	FALSE	NA	Nucleoplasm;Nucleus	NA		FALSE
rabggta	myom1	myom1_rabggta	0.417185	3.3385e-08	1.39047e-06	NA	NA	FALSE	NA	FALSE	NA	Nucleoplasm;Nucleus	NA		FALSE
hint1	myom1	hint1_myom1	0.471372	2.43631e-10	1.89966e-08	NA	NA	FALSE	NA	FALSE	NA	Cytosol	NA		FALSE
prdx3	myom1	myom1_prdx3	0.433179	8.53713e-09	4.26527e-07	NA	NA	FALSE	NA	FALSE	NA	NA	NA		FALSE
macrod1	myom1	macrod1_myom1	0.575565	1.13155e-15	3.30469e-13	NA	NA	FALSE	NA	FALSE	NA	Nucleoplasm;Nucleus	NA		FALSE
cobl	myom1	cobl_myom1	0.416016	3.67814e-08	1.51158e-06	NA	NA	FALSE	NA	FALSE	NA	Cell Junctions;Plasma membrane	NA		FALSE
prune1	myom1	myom1_prune1	0.438045	5.55873e-09	2.93594e-07	NA	NA	FALSE	NA	FALSE	NA	NA	NA		FALSE
phykpl	myom1	myom1_phykpl	0.374038	9.43731e-07	2.43356e-05	NA	NA	FALSE	NA	FALSE	NA	Mitochondria;Cytoplasm	NA		FALSE
cab39	myom1	cab39_myom1	0.406653	7.88894e-08	2.91729e-06	NA	NA	FALSE	NA	FALSE	NA	Nucleoli;Nucleus	NA		FALSE
map2k4	myom1	map2k4_myom1	0.546241	5.54516e-14	1.09921e-11	NA	NA	FALSE	NA	FALSE	NA	Nucleoplasm;Nucleus	NA		FALSE
lactb	myom1	lactb_myom1	0.472496	2.17937e-10	1.72244e-08	NA	NA	FALSE	NA	FALSE	NA	Mitochondria;Cytoplasm	NA		FALSE
prdx2	myom1	myom1_prdx2	0.343361	7.70601e-06	0.000142524	NA	NA	FALSE	NA	FALSE	NA	NA	NA		FALSE
sar1a	myom1	myom1_sar1a	0.43761	5.77743e-09	3.03647e-07	NA	NA	FALSE	NA	FALSE	NA	Endoplasmic reticulum;Cytoplasm	NA		FALSE
carns1	myom1	carns1_myom1	0.52444	7.90561e-13	1.18317e-10	NA	NA	FALSE	NA	FALSE	NA	NA	NA		FALSE
dhdh	myom1	dhdh_myom1	0.436592	6.32286e-09	3.28465e-07	NA	NA	FALSE	NA	FALSE	NA	Nucleoplasm;Nucleus;Actin filaments;Cytoskeleton	NA		FALSE
cpped1	myom1	cpped1_myom1	0.325816	2.3278e-05	0.000356944	NA	NA	FALSE	NA	FALSE	NA	Cytosol	NA		FALSE
kyat3	myom1	kyat3_myom1	0.326483	2.23466e-05	0.000345076	NA	NA	FALSE	NA	FALSE	NA	NA	NA		FALSE
itpa	myom1	itpa_myom1	0.522607	9.80072e-13	1.4332e-10	NA	NA	FALSE	NA	FALSE	NA	Cytosol	NA		FALSE
chchd3	myom1	chchd3_myom1	0.528552	4.85932e-13	7.66399e-11	NA	NA	FALSE	NA	FALSE	NA	Mitochondria;Cytoplasm	NA		FALSE
pura	myom1	myom1_pura	0.448318	2.19671e-09	1.30538e-07	NA	NA	FALSE	NA	FALSE	NA	NA	NA		FALSE
gsto1	myom1	gsto1_myom1	0.400004	1.33737e-07	4.58849e-06	NA	NA	FALSE	NA	FALSE	NA	NA	NA		FALSE
nek9	myom1	myom1_nek9	0.339555	9.85121e-06	0.000174967	NA	NA	FALSE	NA	FALSE	NA	Mitochondria;Cytoplasm	NA		FALSE
hdhd2	myom1	hdhd2_myom1	0.705993	9.43026e-26	1.96242e-22	NA	NA	FALSE	NA	FALSE	NA	Vesicles	NA		FALSE
ubac1	myom1	myom1_ubac1	0.468864	3.11952e-10	2.36054e-08	NA	NA	FALSE	NA	FALSE	NA	Cytosol;Plasma membrane	NA		FALSE
nqo2	myom1	myom1_nqo2	0.339437	9.92547e-06	0.000176056	NA	NA	FALSE	NA	FALSE	NA	Cytosol	NA		FALSE
hhatl	myom1	hhatl_myom1	0.460595	6.95043e-10	4.77175e-08	NA	NA	FALSE	NA	FALSE	NA	NA	NA		FALSE
ndufb7	myom1	myom1_ndufb7	0.403491	1.01548e-07	3.6232e-06	NA	NA	FALSE	NA	FALSE	NA	NA	NA		FALSE
hagh	myom1	hagh_myom1	0.432779	8.84147e-09	4.39719e-07	NA	NA	FALSE	NA	FALSE	NA	NA	NA		FALSE
ykt6	myom1	myom1_ykt6	0.436196	6.54835e-09	3.38681e-07	NA	NA	FALSE	NA	FALSE	NA	Cytosol	NA		FALSE
ndufb11	myom1	myom1_ndufb11	0.365786	1.69644e-06	3.99902e-05	NA	NA	FALSE	NA	FALSE	NA	Mitochondria;Cytoplasm	NA		FALSE
otub1	myom1	myom1_otub1	0.593126	9.07993e-17	3.37846e-14	NA	NA	FALSE	NA	FALSE	NA	Nucleus;Cytosol	NA		FALSE
vps25	myom1	myom1_vps25	0.336518	1.19558e-05	0.000205553	NA	NA	FALSE	NA	FALSE	NA	Centrosome	NA		FALSE
cisd1	myom1	cisd1_myom1	0.691092	2.49192e-24	4.04303e-21	NA	NA	FALSE	NA	FALSE	NA	Mitochondria;Cytoplasm	NA		FALSE
prkag1	myom1	myom1_prkag1	0.516774	1.92542e-12	2.61493e-10	NA	NA	FALSE	NA	FALSE	NA	Nucleoplasm;Nucleus;Cytosol	NA		FALSE
kyat1	myom1	kyat1_myom1	0.49467	2.22128e-11	2.2927e-09	NA	NA	FALSE	NA	FALSE	NA	NA	NA		FALSE
mpp6	myom1	mpp6_myom1	0.312391	5.18674e-05	0.000689511	NA	NA	FALSE	NA	FALSE	NA	NA	NA		FALSE
sod1	myom1	myom1_sod1	0.600542	2.98577e-17	1.23201e-14	NA	NA	FALSE	NA	FALSE	NA	Nucleus;Cytosol;Plasma membrane	NA		FALSE
nae1	myom1	myom1_nae1	0.402388	1.10822e-07	3.90567e-06	NA	NA	FALSE	NA	FALSE	NA	Nucleus	NA		FALSE
tapt1	myom1	myom1_tapt1	0.333927	1.40807e-05	0.00023542	NA	NA	FALSE	NA	FALSE	NA	Vesicles	NA		FALSE
impad1	myom1	impad1_myom1	0.448807	2.10005e-09	1.25494e-07	NA	NA	FALSE	NA	FALSE	NA	Golgi apparatus;Cytoplasm	NA		FALSE
crot	myom1	crot_myom1	0.561816	7.36027e-15	1.78714e-12	NA	NA	FALSE	NA	FALSE	NA	Vesicles	NA		FALSE
sun1	myom1	myom1_sun1	0.442412	3.76019e-09	2.08809e-07	NA	NA	FALSE	NA	FALSE	NA	Nuclear membrane;Nucleus	NA		FALSE
sypl2	myom1	myom1_sypl2	0.362054	2.20011e-06	4.97951e-05	NA	NA	FALSE	NA	FALSE	NA	Nucleoplasm;Nucleus	NA		FALSE
cops6	myom1	cops6_myom1	0.338009	1.08741e-05	0.000189921	NA	NA	FALSE	NA	FALSE	NA	Nucleoplasm;Nucleus	NA		FALSE
mapk9	myom1	mapk9_myom1	0.465225	4.45004e-10	3.22607e-08	NA	NA	FALSE	NA	FALSE	NA	NA	NA		FALSE
mdp1	myom1	mdp1_myom1	0.5933	8.84785e-17	3.29942e-14	NA	NA	FALSE	NA	FALSE	NA	Nucleoplasm;Nucleus	NA		FALSE
akr7a5	myom1	akr7a5_myom1	0.430004	1.12552e-08	5.42548e-07	NA	NA	FALSE	NA	FALSE	NA	NA	NA		FALSE
ube2l3	myom1	myom1_ube2l3	0.573358	1.5373e-15	4.36037e-13	NA	NA	FALSE	NA	FALSE	NA	Nucleus;Cytosol	NA		FALSE
ndufs8	myom1	myom1_ndufs8	0.40294	1.06085e-07	3.76203e-06	NA	NA	FALSE	NA	FALSE	NA	Mitochondria;Cytoplasm	NA		FALSE
bpgm	myom1	bpgm_myom1	0.368384	1.41294e-06	3.42537e-05	NA	NA	FALSE	NA	FALSE	NA	Nucleoli;Nucleus	NA		FALSE
bphl	myom1	bphl_myom1	0.309044	6.29604e-05	0.000807758	NA	NA	FALSE	NA	FALSE	NA	Nucleoplasm;Nucleus;Mitochondria;Cytoplasm	NA		FALSE
epm2aip1	myom1	epm2aip1_myom1	0.307114	7.03348e-05	0.000884094	NA	NA	FALSE	NA	FALSE	NA	NA	NA		FALSE
pter	myom1	myom1_pter	0.443369	3.44894e-09	1.93664e-07	NA	NA	FALSE	NA	FALSE	NA	Nucleoplasm;Nucleus	NA		FALSE
prkcq	myom1	myom1_prkcq	0.385475	4.07441e-07	1.19146e-05	NA	NA	FALSE	NA	FALSE	NA	Microtubule organizing center;Cytoskeleton	NA		FALSE
apip	myom1	apip_myom1	0.401794	1.16156e-07	4.06663e-06	NA	NA	FALSE	NA	FALSE	NA	Nucleoplasm;Nucleus	NA		FALSE
impa1	myom1	impa1_myom1	0.378601	6.7761e-07	1.83691e-05	NA	NA	FALSE	NA	FALSE	NA	Mitochondria;Cytoplasm	NA		FALSE
stk38	myom1	myom1_stk38	0.451759	1.59841e-09	9.88839e-08	NA	NA	FALSE	NA	FALSE	NA	Cytosol	NA		FALSE
sgcd	myom1	myom1_sgcd	0.403061	1.05068e-07	3.73114e-06	NA	NA	FALSE	NA	FALSE	NA	NA	NA		FALSE
nek7	myom1	myom1_nek7	0.428832	1.2455e-08	5.92424e-07	NA	NA	FALSE	NA	FALSE	NA	Nucleoplasm;Nucleus	NA		FALSE
c2cd2	myom1	c2cd2_myom1	0.333743	1.42448e-05	0.000237697	NA	NA	FALSE	NA	FALSE	NA	Nucleoplasm;Nucleus	NA		FALSE
phpt1	myom1	myom1_phpt1	0.55818	1.19046e-14	2.75745e-12	NA	NA	FALSE	NA	FALSE	NA	Cytosol	NA		FALSE
prmt1	myom1	myom1_prmt1	0.383273	4.80152e-07	1.37042e-05	NA	NA	FALSE	NA	FALSE	NA	Nucleoplasm;Nucleus	NA		FALSE
mettl26	myom1	mettl26_myom1	0.309542	6.11814e-05	0.000789044	NA	NA	FALSE	NA	FALSE	NA	NA	NA		FALSE
psmb7	myom1	myom1_psmb7	0.334578	1.35154e-05	0.00022754	NA	NA	FALSE	NA	FALSE	NA	Nucleoplasm;Nucleus	NA		FALSE
tatdn1	myom1	myom1_tatdn1	0.425895	1.6027e-08	7.36822e-07	NA	NA	FALSE	NA	FALSE	NA	Nucleoplasm;Nucleus	NA		FALSE
thnsl2	myom1	myom1_thnsl2	0.493721	2.45762e-11	2.50685e-09	NA	NA	FALSE	NA	FALSE	NA	NA	NA		FALSE
nutf2	myom1	myom1_nutf2	0.623898	7.39839e-19	4.28673e-16	NA	NA	FALSE	NA	FALSE	NA	Microtubules	NA		FALSE
bola1	myom1	bola1_myom1	0.317635	3.81e-05	0.00053554	NA	NA	FALSE	NA	FALSE	NA	NA	NA		FALSE
fnta	myom1	fnta_myom1	0.454622	1.22359e-09	7.82694e-08	NA	NA	FALSE	NA	FALSE	NA	Cytosol	NA		FALSE
abhd11	myom1	abhd11_myom1	0.371661	1.11932e-06	2.81244e-05	NA	NA	FALSE	NA	FALSE	NA	Mitochondria;Cytoplasm	NA		FALSE
dpp9	myom1	dpp9_myom1	0.333004	1.49206e-05	0.000247078	NA	NA	FALSE	NA	FALSE	NA	Cytosol	NA		FALSE
prpsap2	myom1	myom1_prpsap2	0.326518	2.22999e-05	0.000344493	NA	NA	FALSE	NA	FALSE	NA	Nucleoplasm;Nucleus;Cytosol	NA		FALSE
bckdhb	myom1	bckdhb_myom1	0.324744	2.485e-05	0.000376742	NA	NA	FALSE	NA	FALSE	NA	NA	NA		FALSE
eml2	myom1	eml2_myom1	0.488672	4.18721e-11	4.01753e-09	NA	NA	FALSE	NA	FALSE	NA	Vesicles	NA		FALSE
clic5	myom1	clic5_myom1	0.371946	1.09668e-06	2.76383e-05	NA	NA	FALSE	NA	FALSE	NA	Plasma membrane	NA		FALSE
lypla1	myom1	lypla1_myom1	0.613757	3.82645e-18	1.91213e-15	NA	NA	FALSE	NA	FALSE	NA	Cytosol	NA		FALSE
cops8	myom1	cops8_myom1	0.301674	9.57003e-05	0.00113645	NA	NA	FALSE	NA	FALSE	NA	Nucleoplasm;Nucleus	NA		FALSE
prps1l3	myom1	myom1_prps1l3	0.651751	5.8656e-21	5.13662e-18	NA	NA	FALSE	NA	FALSE	NA	NA	NA		FALSE
tcap	myom1	myom1_tcap	0.380095	6.07287e-07	1.67325e-05	NA	NA	FALSE	NA	FALSE	426	NA	NA		FALSE
cenpv	myom1	cenpv_myom1	0.377597	7.29164e-07	1.95539e-05	NA	NA	FALSE	NA	FALSE	NA	Nucleoplasm;Nucleus	NA		FALSE
ube2n	myom1	myom1_ube2n	0.546627	5.28106e-14	1.05194e-11	NA	NA	FALSE	NA	FALSE	NA	Nucleus	NA		FALSE
rrm1	myom1	myom1_rrm1	0.338329	1.06546e-05	0.000186718	NA	NA	FALSE	NA	FALSE	NA	Cytosol	NA		FALSE
pfn2	myom1	myom1_pfn2	0.482873	7.63924e-11	6.83031e-09	NA	NA	FALSE	NA	FALSE	NA	NA	NA		FALSE
clcn1	myom1	clcn1_myom1	0.409005	6.5271e-08	2.47754e-06	NA	NA	FALSE	NA	FALSE	NA	NA	NA		FALSE
ndufs4	myom1	myom1_ndufs4	0.395284	1.93187e-07	6.29634e-06	NA	NA	FALSE	NA	FALSE	NA	Mitochondria;Cytoplasm	NA		FALSE
asph	myom1	asph_myom1	0.402113	1.13265e-07	3.97984e-06	NA	NA	FALSE	NA	FALSE	NA	Endoplasmic reticulum;Cytoplasm	NA		FALSE
asph	myom1	asph_myom1	0.402113	1.13265e-07	3.97984e-06	NA	NA	FALSE	NA	FALSE	NA	Endoplasmic reticulum;Cytoplasm	NA		FALSE
asph	myom1	asph_myom1	0.402113	1.13265e-07	3.97984e-06	NA	NA	FALSE	NA	FALSE	NA	Endoplasmic reticulum;Cytoplasm	NA		FALSE
tecr	myom1	myom1_tecr	0.675514	6.22245e-23	7.84878e-20	NA	NA	FALSE	NA	FALSE	NA	Endoplasmic reticulum;Cytoplasm	NA		FALSE
isoc1	myom1	isoc1_myom1	0.529733	4.2204e-13	6.75424e-11	NA	NA	FALSE	NA	FALSE	NA	Endoplasmic reticulum;Cytoplasm;Vesicles	NA		FALSE
parvb	myom1	myom1_parvb	0.346477	6.28748e-06	0.000120263	NA	NA	FALSE	NA	FALSE	NA	Cytosol	NA		FALSE
ndufs6	myom1	myom1_ndufs6	0.359968	2.5404e-06	5.62138e-05	NA	NA	FALSE	NA	FALSE	NA	NA	NA		FALSE
ano10	myom1	ano10_myom1	0.388653	3.20784e-07	9.71023e-06	NA	NA	FALSE	NA	FALSE	NA	NA	NA		FALSE
vps13a	myom1	myom1_vps13a	0.361873	2.22778e-06	5.03216e-05	NA	NA	FALSE	NA	FALSE	NA	NA	NA		FALSE
mospd1	myom1	mospd1_myom1	0.434678	7.48542e-09	3.80409e-07	NA	NA	FALSE	NA	FALSE	NA	Nucleoplasm;Nucleus;Vesicles	NA		FALSE
gsk3b	myom1	gsk3b_myom1	0.31361	4.83037e-05	0.000650488	NA	NA	FALSE	NA	FALSE	NA	Nucleus	NA		FALSE
psmb3	myom1	myom1_psmb3	0.40919	6.43008e-08	2.44591e-06	NA	NA	FALSE	NA	FALSE	NA	NA	NA		FALSE
psmb6	myom1	myom1_psmb6	0.340245	9.42438e-06	0.000168633	NA	NA	FALSE	NA	FALSE	NA	Nucleoplasm;Nucleus	NA		FALSE
rnpep	myom1	myom1_rnpep	0.416223	3.61563e-08	1.48942e-06	NA	NA	FALSE	NA	FALSE	NA	Golgi apparatus;Cytoplasm	NA		FALSE
psmb2	myom1	myom1_psmb2	0.31293	5.026e-05	0.000672082	NA	NA	FALSE	NA	FALSE	NA	Nucleoplasm;Nucleus	NA		FALSE
ndufs7	myom1	myom1_ndufs7	0.310821	5.68212e-05	0.000742982	NA	NA	FALSE	NA	FALSE	NA	NA	NA		FALSE
mpc1	myom1	mpc1_myom1	0.349808	5.04626e-06	0.00010004	NA	NA	FALSE	NA	FALSE	NA	Mitochondria;Cytoplasm	NA		FALSE
sdr39u1	myom1	myom1_sdr39u1	0.584676	3.11529e-16	1.03066e-13	NA	NA	FALSE	NA	FALSE	NA	Nucleoplasm;Nucleus;Cytosol	NA		FALSE
gstk1	myom1	gstk1_myom1	0.495609	2.00912e-11	2.09868e-09	NA	NA	FALSE	NA	FALSE	NA	Vesicles	NA		FALSE
epdr1	myom1	epdr1_myom1	0.45417	1.27645e-09	8.12441e-08	NA	NA	FALSE	NA	FALSE	NA	NA	NA		FALSE
pdcd5	myom1	myom1_pdcd5	0.40809	7.02753e-08	2.64061e-06	NA	NA	FALSE	NA	FALSE	NA	Cytosol	NA		FALSE
ube2m	myom1	myom1_ube2m	0.487408	4.77815e-11	4.51505e-09	NA	NA	FALSE	NA	FALSE	NA	Nucleus	NA		FALSE
neb	dync1h1	dync1h1_neb	0.420429	2.54615e-08	1.10007e-06	NA	NA	FALSE	NA	FALSE	NA	NA	Centrosome;Cytosol		FALSE
dmd	dync1h1	dmd_dync1h1	0.452088	1.55031e-09	9.62671e-08	NA	NA	FALSE	NA	FALSE	309	NA	Centrosome;Cytosol		FALSE
myom1	dync1h1	dync1h1_myom1	0.325637	2.35332e-05	0.000360198	NA	NA	FALSE	NA	FALSE	NA	NA	Centrosome;Cytosol		FALSE
clip1	dync1h1	clip1_dync1h1	0.366653	1.59626e-06	3.79816e-05	NA	NA	FALSE	NA	FALSE	982	Microtubule ends;Microtubules;Cytoskeleton;Cytosol	Centrosome;Cytosol	Cytosol	TRUE
pgm2	dync1h1	dync1h1_pgm2	0.507766	5.32788e-12	6.46755e-10	NA	NA	FALSE	NA	FALSE	NA	Intermediate filaments	Centrosome;Cytosol		FALSE
gpi1	dync1h1	dync1h1_gpi1	0.384552	4.36543e-07	1.26366e-05	NA	NA	FALSE	NA	FALSE	NA	NA	Centrosome;Cytosol		FALSE
ecpas	dync1h1	dync1h1_ecpas	0.425955	1.59445e-08	7.33593e-07	NA	NA	FALSE	NA	FALSE	NA	NA	Centrosome;Cytosol		FALSE
cand2	dync1h1	cand2_dync1h1	0.341976	8.42975e-06	0.000153622	NA	NA	FALSE	NA	FALSE	NA	Nuclear bodies;Nucleoplasm;Nucleus	Centrosome;Cytosol		FALSE
ktn1	dync1h1	dync1h1_ktn1	0.303289	8.73962e-05	0.00105554	NA	NA	FALSE	NA	FALSE	NA	Endoplasmic reticulum;Cytoplasm	Centrosome;Cytosol		FALSE
pvalb	dync1h1	dync1h1_pvalb	0.324691	2.49306e-05	0.000377725	NA	NA	FALSE	NA	FALSE	NA	Nucleoplasm;Nucleus	Centrosome;Cytosol		FALSE
dnm1l	dync1h1	dnm1l_dync1h1	0.320418	3.22719e-05	0.000467328	NA	NA	FALSE	NA	FALSE	158	Cytosol	Centrosome;Cytosol	Cytosol	TRUE
myo18a	dync1h1	dync1h1_myo18a	0.425104	1.71458e-08	7.81177e-07	NA	NA	FALSE	NA	FALSE	291	NA	Centrosome;Cytosol		FALSE
phkb	dync1h1	dync1h1_phkb	0.413216	4.63227e-08	1.8441e-06	NA	NA	FALSE	NA	FALSE	NA	Golgi apparatus;Cytoplasm	Centrosome;Cytosol		FALSE
unc45b	dync1h1	dync1h1_unc45b	0.355923	3.3483e-06	7.09241e-05	NA	NA	FALSE	NA	FALSE	NA	Cytosol	Centrosome;Cytosol	Cytosol	TRUE
cacna1s	dync1h1	cacna1s_dync1h1	0.306023	7.48527e-05	0.000930195	NA	NA	FALSE	NA	FALSE	NA	NA	Centrosome;Cytosol		FALSE
casq1	dync1h1	casq1_dync1h1	0.327502	2.09921e-05	0.000327709	NA	NA	FALSE	NA	FALSE	NA	Nucleoplasm;Nucleus;Mitochondria;Cytoplasm	Centrosome;Cytosol		FALSE
map2k1	dync1h1	dync1h1_map2k1	0.367891	1.46305e-06	3.52747e-05	NA	NA	FALSE	NA	FALSE	NA	Cytosol;Plasma membrane	Centrosome;Cytosol	Cytosol	TRUE
psmd7	dync1h1	dync1h1_psmd7	0.338875	1.02895e-05	0.000181405	NA	NA	FALSE	NA	FALSE	413	Nucleoplasm;Nucleus	Centrosome;Cytosol		FALSE
tarsl2	dync1h1	dync1h1_tarsl2	0.32836	1.99134e-05	0.000313701	NA	NA	FALSE	NA	FALSE	NA	Cytosol	Centrosome;Cytosol	Cytosol	TRUE
ywhah	dync1h1	dync1h1_ywhah	0.311336	5.51485e-05	0.000724946	NA	NA	FALSE	NA	FALSE	NA	NA	Centrosome;Cytosol		FALSE
cops3	dync1h1	cops3_dync1h1	0.400352	1.30131e-07	4.48262e-06	NA	NA	FALSE	NA	FALSE	NA	Nucleus	Centrosome;Cytosol		FALSE
rab18	dync1h1	dync1h1_rab18	0.380212	6.02083e-07	1.6611e-05	NA	NA	FALSE	NA	FALSE	904	NA	Centrosome;Cytosol		FALSE
gps1	dync1h1	dync1h1_gps1	0.407446	7.40179e-08	2.76144e-06	NA	NA	FALSE	NA	FALSE	NA	NA	Centrosome;Cytosol		FALSE
stbd1	dync1h1	dync1h1_stbd1	0.327737	2.0691e-05	0.000323831	NA	NA	FALSE	NA	FALSE	NA	Cytosol	Centrosome;Cytosol	Cytosol	TRUE
rabggta	dync1h1	dync1h1_rabggta	0.342725	8.03089e-06	0.000147524	NA	NA	FALSE	NA	FALSE	NA	Nucleoplasm;Nucleus	Centrosome;Cytosol		FALSE
cab39	dync1h1	cab39_dync1h1	0.488834	4.11644e-11	3.95768e-09	NA	NA	FALSE	NA	FALSE	351	Nucleoli;Nucleus	Centrosome;Cytosol		FALSE
map2k4	dync1h1	dync1h1_map2k4	0.4883	4.35296e-11	4.15831e-09	NA	NA	FALSE	NA	FALSE	NA	Nucleoplasm;Nucleus	Centrosome;Cytosol		FALSE
sar1a	dync1h1	dync1h1_sar1a	0.403093	1.04799e-07	3.72314e-06	NA	NA	FALSE	NA	FALSE	NA	Endoplasmic reticulum;Cytoplasm	Centrosome;Cytosol		FALSE
smyd2	dync1h1	dync1h1_smyd2	0.354281	3.74121e-06	7.78494e-05	NA	NA	FALSE	NA	FALSE	NA	Cytosol	Centrosome;Cytosol	Cytosol	TRUE
dync1i2	dync1h1	dync1h1_dync1i2	0.454966	1.18467e-09	7.60814e-08	NA	NA	FALSE	NA	FALSE	998	Endoplasmic reticulum;Cytoplasm;Cytosol	Centrosome;Cytosol	Cytosol	TRUE
tbc1d1	dync1h1	dync1h1_tbc1d1	0.345475	6.71442e-06	0.000127066	NA	NA	FALSE	NA	FALSE	NA	Nucleoli;Nucleus	Centrosome;Cytosol		FALSE
itpa	dync1h1	dync1h1_itpa	0.320372	3.23616e-05	0.000468397	NA	NA	FALSE	NA	FALSE	NA	Cytosol	Centrosome;Cytosol	Cytosol	TRUE
nek9	dync1h1	dync1h1_nek9	0.361801	2.23891e-06	5.05353e-05	NA	NA	FALSE	NA	FALSE	NA	Mitochondria;Cytoplasm	Centrosome;Cytosol		FALSE
mlec	dync1h1	dync1h1_mlec	0.46467	4.69604e-10	3.38182e-08	NA	NA	FALSE	NA	FALSE	NA	NA	Centrosome;Cytosol		FALSE
nqo2	dync1h1	dync1h1_nqo2	0.34838	5.54708e-06	0.00010827	NA	NA	FALSE	NA	FALSE	NA	Cytosol	Centrosome;Cytosol	Cytosol	TRUE
arl3	dync1h1	arl3_dync1h1	0.311756	5.38173e-05	0.000710612	NA	NA	FALSE	NA	FALSE	NA	Centrosome	Centrosome;Cytosol	Centrosome	TRUE
ykt6	dync1h1	dync1h1_ykt6	0.357346	3.03969e-06	6.53772e-05	NA	NA	FALSE	NA	FALSE	905	Cytosol	Centrosome;Cytosol	Cytosol	TRUE
otub1	dync1h1	dync1h1_otub1	0.434922	7.3267e-09	3.73361e-07	NA	NA	FALSE	NA	FALSE	NA	Nucleus;Cytosol	Centrosome;Cytosol	Cytosol	TRUE
mapre2	dync1h1	dync1h1_mapre2	0.31652	4.07023e-05	0.000565323	NA	NA	FALSE	NA	FALSE	680	Nucleoplasm;Nucleus	Centrosome;Cytosol		FALSE
prkag1	dync1h1	dync1h1_prkag1	0.398064	1.55667e-07	5.22973e-06	NA	NA	FALSE	NA	FALSE	NA	Nucleoplasm;Nucleus;Cytosol	Centrosome;Cytosol	Cytosol	TRUE
crot	dync1h1	crot_dync1h1	0.319264	3.45793e-05	0.000494602	NA	NA	FALSE	NA	FALSE	NA	Vesicles	Centrosome;Cytosol		FALSE
sypl2	dync1h1	dync1h1_sypl2	0.377233	7.48746e-07	1.99989e-05	NA	NA	FALSE	NA	FALSE	NA	Nucleoplasm;Nucleus	Centrosome;Cytosol		FALSE
rap1gds1	dync1h1	dync1h1_rap1gds1	0.328439	1.98156e-05	0.000312413	NA	NA	FALSE	NA	FALSE	NA	Cytosol	Centrosome;Cytosol	Cytosol	TRUE
cops6	dync1h1	cops6_dync1h1	0.35421	3.75935e-06	7.81657e-05	NA	NA	FALSE	NA	FALSE	NA	Nucleoplasm;Nucleus	Centrosome;Cytosol		FALSE
arih1	dync1h1	arih1_dync1h1	0.553294	2.25104e-14	4.89008e-12	NA	NA	FALSE	NA	FALSE	NA	Golgi apparatus;Cytoplasm	Centrosome;Cytosol		FALSE
ube2l3	dync1h1	dync1h1_ube2l3	0.387781	3.42615e-07	1.02738e-05	NA	NA	FALSE	NA	FALSE	NA	Nucleus;Cytosol	Centrosome;Cytosol	Cytosol	TRUE
drg1	dync1h1	drg1_dync1h1	0.366301	1.6363e-06	3.87878e-05	NA	NA	FALSE	NA	FALSE	NA	Nuclear bodies;Nucleoplasm;Nucleus;Cytosol	Centrosome;Cytosol	Cytosol	TRUE
prkcq	dync1h1	dync1h1_prkcq	0.369603	1.29602e-06	3.18367e-05	NA	NA	FALSE	NA	FALSE	NA	Microtubule organizing center;Cytoskeleton	Centrosome;Cytosol		FALSE
eif3m	dync1h1	dync1h1_eif3m	0.339123	1.01276e-05	0.000179033	NA	NA	FALSE	NA	FALSE	NA	Cytosol	Centrosome;Cytosol	Cytosol	TRUE
sgcd	dync1h1	dync1h1_sgcd	0.337879	1.0965e-05	0.000191255	NA	NA	FALSE	NA	FALSE	NA	NA	Centrosome;Cytosol		FALSE
ufsp2	dync1h1	dync1h1_ufsp2	0.301248	9.8012e-05	0.00115868	NA	NA	FALSE	NA	FALSE	NA	Nucleus;Cytosol	Centrosome;Cytosol	Cytosol	TRUE
prmt1	dync1h1	dync1h1_prmt1	0.52025	1.28949e-12	1.83062e-10	NA	NA	FALSE	NA	FALSE	NA	Nucleoplasm;Nucleus	Centrosome;Cytosol		FALSE
rac1	dync1h1	dync1h1_rac1	0.382242	5.183e-07	1.462e-05	NA	NA	FALSE	NA	FALSE	229	Nucleus;Cytosol	Centrosome;Cytosol	Cytosol	TRUE
tatdn1	dync1h1	dync1h1_tatdn1	0.348677	5.43912e-06	0.0001065	NA	NA	FALSE	NA	FALSE	NA	Nucleoplasm;Nucleus	Centrosome;Cytosol		FALSE
nutf2	dync1h1	dync1h1_nutf2	0.46321	5.40721e-10	3.82652e-08	NA	NA	FALSE	NA	FALSE	219	Microtubules	Centrosome;Cytosol		FALSE
psma3	dync1h1	dync1h1_psma3	0.38057	5.86439e-07	1.6243e-05	NA	NA	FALSE	NA	FALSE	NA	NA	Centrosome;Cytosol		FALSE
lypla1	dync1h1	dync1h1_lypla1	0.339266	1.0035e-05	0.000177673	NA	NA	FALSE	NA	FALSE	NA	Cytosol	Centrosome;Cytosol	Cytosol	TRUE
faf1	dync1h1	dync1h1_faf1	0.324158	2.57519e-05	0.000388022	NA	NA	FALSE	NA	FALSE	NA	Nucleus	Centrosome;Cytosol		FALSE
psmd8	dync1h1	dync1h1_psmd8	0.46543	4.36202e-10	3.16932e-08	NA	NA	FALSE	NA	FALSE	NA	Cytosol	Centrosome;Cytosol	Cytosol	TRUE
arl6ip5	dync1h1	arl6ip5_dync1h1	0.315406	4.34684e-05	0.000596738	NA	NA	FALSE	NA	FALSE	NA	Endoplasmic reticulum;Cytoplasm	Centrosome;Cytosol		FALSE
tecr	dync1h1	dync1h1_tecr	0.311729	5.39021e-05	0.000711536	NA	NA	FALSE	NA	FALSE	NA	Endoplasmic reticulum;Cytoplasm	Centrosome;Cytosol		FALSE
rps15a	dync1h1	dync1h1_rps15a	0.304489	8.16635e-05	0.000998731	NA	NA	FALSE	NA	FALSE	NA	NA	Centrosome;Cytosol		FALSE
parvb	dync1h1	dync1h1_parvb	0.390912	2.70228e-07	8.38821e-06	NA	NA	FALSE	NA	FALSE	NA	Cytosol	Centrosome;Cytosol	Cytosol	TRUE
psmb3	dync1h1	dync1h1_psmb3	0.448475	2.1651e-09	1.2889e-07	NA	NA	FALSE	NA	FALSE	NA	NA	Centrosome;Cytosol		FALSE
psmb6	dync1h1	dync1h1_psmb6	0.366212	1.64658e-06	3.89956e-05	NA	NA	FALSE	NA	FALSE	NA	Nucleoplasm;Nucleus	Centrosome;Cytosol		FALSE
psmb2	dync1h1	dync1h1_psmb2	0.307289	6.96314e-05	0.000876857	NA	NA	FALSE	NA	FALSE	NA	Nucleoplasm;Nucleus	Centrosome;Cytosol		FALSE
pdcd5	dync1h1	dync1h1_pdcd5	0.316137	4.16352e-05	0.000575969	NA	NA	FALSE	NA	FALSE	NA	Cytosol	Centrosome;Cytosol	Cytosol	TRUE
ube2m	dync1h1	dync1h1_ube2m	0.426834	1.47895e-08	6.87573e-07	NA	NA	FALSE	NA	FALSE	NA	Nucleus	Centrosome;Cytosol		FALSE
prmt5	dync1h1	dync1h1_prmt5	0.468548	3.21776e-10	2.42579e-08	NA	NA	FALSE	NA	FALSE	469	Nucleus;Cytosol	Centrosome;Cytosol	Cytosol	TRUE
neb	myom2	myom2_neb	0.918609	2.09154e-66	3.17797e-61	NA	NA	FALSE	NA	FALSE	554	NA	Mitochondria;Cytoplasm		FALSE
myh4	myom2	myh4_myom2	0.896985	1.32727e-58	1.28337e-53	NA	NA	FALSE	NA	FALSE	751	NA	Mitochondria;Cytoplasm		FALSE
dmd	myom2	dmd_myom2	0.573276	1.55474e-15	4.40371e-13	NA	NA	FALSE	NA	FALSE	330	NA	Mitochondria;Cytoplasm		FALSE
myom1	myom2	myom1_myom2	0.887758	8.67854e-56	6.69962e-51	NA	NA	FALSE	NA	FALSE	595	NA	Mitochondria;Cytoplasm		FALSE
dync1h1	myom2	dync1h1_myom2	0.364506	1.85529e-06	4.31202e-05	NA	NA	FALSE	NA	FALSE	NA	Centrosome;Cytosol	Mitochondria;Cytoplasm		FALSE
clip1	myom2	clip1_myom2	0.303612	8.58174e-05	0.00103995	NA	NA	FALSE	NA	FALSE	NA	Microtubule ends;Microtubules;Cytoskeleton;Cytosol	Mitochondria;Cytoplasm		FALSE
ugp2	myom2	myom2_ugp2	0.502126	9.92762e-12	1.12443e-09	NA	NA	FALSE	NA	FALSE	NA	Centrosome;Mitochondria;Cytoplasm	Mitochondria;Cytoplasm	Mitochondria;Cytoplasm	TRUE
gpd2	myom2	gpd2_myom2	0.629789	2.77008e-19	1.74474e-16	NA	NA	FALSE	NA	FALSE	NA	NA	Mitochondria;Cytoplasm		FALSE
pgm2	myom2	myom2_pgm2	0.776161	7.26096e-34	5.43862e-30	NA	NA	FALSE	NA	FALSE	NA	Intermediate filaments	Mitochondria;Cytoplasm		FALSE
anxa6	myom2	anxa6_myom2	0.400994	1.23717e-07	4.29278e-06	NA	NA	FALSE	NA	FALSE	NA	Nuclear speckles;Nucleoplasm;Nucleus	Mitochondria;Cytoplasm		FALSE
anxa6	myom2	anxa6_myom2	0.400994	1.23717e-07	4.29278e-06	NA	NA	FALSE	NA	FALSE	NA	Nuclear speckles;Nucleoplasm;Nucleus	Mitochondria;Cytoplasm		FALSE
lamc1	myom2	lamc1_myom2	0.380166	6.04142e-07	1.66591e-05	NA	NA	FALSE	NA	FALSE	NA	Endoplasmic reticulum;Cytoplasm;Plasma membrane	Mitochondria;Cytoplasm	Cytoplasm	TRUE
gpi1	myom2	gpi1_myom2	0.703485	1.65967e-25	3.30845e-22	NA	NA	FALSE	NA	FALSE	NA	NA	Mitochondria;Cytoplasm		FALSE
lamb1	myom2	lamb1_myom2	0.322651	2.82136e-05	0.000418326	NA	NA	FALSE	NA	FALSE	NA	NA	Mitochondria;Cytoplasm		FALSE
mylpf	myom2	mylpf_myom2	0.70339	1.69561e-25	3.37728e-22	NA	NA	FALSE	NA	FALSE	718	NA	Mitochondria;Cytoplasm		FALSE
ecpas	myom2	ecpas_myom2	0.37179	1.10906e-06	2.7904e-05	NA	NA	FALSE	NA	FALSE	NA	NA	Mitochondria;Cytoplasm		FALSE
cand2	myom2	cand2_myom2	0.320412	3.22848e-05	0.000467487	NA	NA	FALSE	NA	FALSE	NA	Nuclear bodies;Nucleoplasm;Nucleus	Mitochondria;Cytoplasm		FALSE
pvalb	myom2	myom2_pvalb	0.460136	7.26182e-10	4.95765e-08	NA	NA	FALSE	NA	FALSE	NA	Nucleoplasm;Nucleus	Mitochondria;Cytoplasm		FALSE
aldoart1	myom2	aldoart1_myom2	0.468117	3.35652e-10	2.5171e-08	NA	NA	FALSE	NA	FALSE	NA	NA	Mitochondria;Cytoplasm		FALSE
phkb	myom2	myom2_phkb	0.692897	1.6936e-24	2.83674e-21	NA	NA	FALSE	NA	FALSE	NA	Golgi apparatus;Cytoplasm	Mitochondria;Cytoplasm	Cytoplasm	TRUE
adssl1	myom2	adssl1_myom2	0.837062	9.27016e-44	2.66482e-39	NA	NA	FALSE	NA	FALSE	NA	NA	Mitochondria;Cytoplasm		FALSE
cacna1s	myom2	cacna1s_myom2	0.775416	9.16565e-34	6.74909e-30	NA	NA	FALSE	NA	FALSE	172	NA	Mitochondria;Cytoplasm		FALSE
casq1	myom2	casq1_myom2	0.743154	1.01555e-29	4.09146e-26	NA	NA	FALSE	NA	FALSE	487	Nucleoplasm;Nucleus;Mitochondria;Cytoplasm	Mitochondria;Cytoplasm	Mitochondria;Cytoplasm	TRUE
gpd1	myom2	gpd1_myom2	0.6528	4.84011e-21	4.30354e-18	NA	NA	FALSE	NA	FALSE	195	NA	Mitochondria;Cytoplasm		FALSE
gys1	myom2	gys1_myom2	0.56104	8.15943e-15	1.96227e-12	NA	NA	FALSE	NA	FALSE	NA	Microtubules;Cytosol	Mitochondria;Cytoplasm		FALSE
myoz1	myom2	myom2_myoz1	0.853836	3.161e-47	1.23003e-42	NA	NA	FALSE	NA	FALSE	583	NA	Mitochondria;Cytoplasm		FALSE
ldha	myom2	ldha_myom2	0.591463	1.16058e-16	4.22052e-14	NA	NA	FALSE	NA	FALSE	225	Cytosol	Mitochondria;Cytoplasm		FALSE
npepps	myom2	myom2_npepps	0.34277	8.00734e-06	0.000147161	NA	NA	FALSE	NA	FALSE	NA	Cytosol	Mitochondria;Cytoplasm		FALSE
sugt1	myom2	myom2_sugt1	0.41541	3.86714e-08	1.57856e-06	NA	NA	FALSE	NA	FALSE	NA	Nucleoplasm;Nucleus;Cytosol	Mitochondria;Cytoplasm		FALSE
ppp5c	myom2	myom2_ppp5c	0.456913	9.86209e-10	6.48074e-08	NA	NA	FALSE	NA	FALSE	NA	Vesicles;Cytosol	Mitochondria;Cytoplasm		FALSE
mtap	myom2	mtap_myom2	0.318027	3.72243e-05	0.000525531	NA	NA	FALSE	NA	FALSE	NA	Cytosol	Mitochondria;Cytoplasm		FALSE
cops3	myom2	cops3_myom2	0.509594	4.34411e-12	5.39646e-10	NA	NA	FALSE	NA	FALSE	NA	Nucleus	Mitochondria;Cytoplasm		FALSE
gpd1l	myom2	gpd1l_myom2	0.31598	4.20218e-05	0.000580304	NA	NA	FALSE	NA	FALSE	NA	NA	Mitochondria;Cytoplasm		FALSE
rab18	myom2	myom2_rab18	0.366088	1.66096e-06	3.92835e-05	NA	NA	FALSE	NA	FALSE	NA	NA	Mitochondria;Cytoplasm		FALSE
gps1	myom2	gps1_myom2	0.382313	5.1561e-07	1.4556e-05	NA	NA	FALSE	NA	FALSE	NA	NA	Mitochondria;Cytoplasm		FALSE
ndufa12	myom2	myom2_ndufa12	0.350438	4.83939e-06	9.65983e-05	NA	NA	FALSE	NA	FALSE	NA	Mitochondria;Cytoplasm	Mitochondria;Cytoplasm	Mitochondria;Cytoplasm	TRUE
glrx3	myom2	glrx3_myom2	0.30226	9.26064e-05	0.0011065	NA	NA	FALSE	NA	FALSE	NA	NA	Mitochondria;Cytoplasm		FALSE
ddx19a	myom2	ddx19a_myom2	0.334841	1.32936e-05	0.000224413	NA	NA	FALSE	NA	FALSE	NA	Nucleoplasm;Nucleus	Mitochondria;Cytoplasm		FALSE
rabggta	myom2	myom2_rabggta	0.412319	4.98517e-08	1.96436e-06	NA	NA	FALSE	NA	FALSE	NA	Nucleoplasm;Nucleus	Mitochondria;Cytoplasm		FALSE
hint1	myom2	hint1_myom2	0.432136	9.35163e-09	4.61792e-07	NA	NA	FALSE	NA	FALSE	NA	Cytosol	Mitochondria;Cytoplasm		FALSE
prdx3	myom2	myom2_prdx3	0.318875	3.53918e-05	0.000504154	NA	NA	FALSE	NA	FALSE	NA	NA	Mitochondria;Cytoplasm		FALSE
macrod1	myom2	macrod1_myom2	0.525714	6.80378e-13	1.03506e-10	NA	NA	FALSE	NA	FALSE	NA	Nucleoplasm;Nucleus	Mitochondria;Cytoplasm		FALSE
cobl	myom2	cobl_myom2	0.462831	5.60867e-10	3.95211e-08	NA	NA	FALSE	NA	FALSE	NA	Cell Junctions;Plasma membrane	Mitochondria;Cytoplasm		FALSE
prune1	myom2	myom2_prune1	0.566033	4.18269e-15	1.07599e-12	NA	NA	FALSE	NA	FALSE	NA	NA	Mitochondria;Cytoplasm		FALSE
phykpl	myom2	myom2_phykpl	0.374029	9.44343e-07	2.43483e-05	NA	NA	FALSE	NA	FALSE	NA	Mitochondria;Cytoplasm	Mitochondria;Cytoplasm	Mitochondria;Cytoplasm	TRUE
cab39	myom2	cab39_myom2	0.385482	4.07211e-07	1.19089e-05	NA	NA	FALSE	NA	FALSE	NA	Nucleoli;Nucleus	Mitochondria;Cytoplasm		FALSE
map2k4	myom2	map2k4_myom2	0.56873	2.90159e-15	7.73495e-13	NA	NA	FALSE	NA	FALSE	NA	Nucleoplasm;Nucleus	Mitochondria;Cytoplasm		FALSE
lactb	myom2	lactb_myom2	0.444695	3.05847e-09	1.74389e-07	NA	NA	FALSE	NA	FALSE	NA	Mitochondria;Cytoplasm	Mitochondria;Cytoplasm	Mitochondria;Cytoplasm	TRUE
prdx2	myom2	myom2_prdx2	0.361246	2.32639e-06	5.22011e-05	NA	NA	FALSE	NA	FALSE	NA	NA	Mitochondria;Cytoplasm		FALSE
sar1a	myom2	myom2_sar1a	0.508363	4.98527e-12	6.0989e-10	NA	NA	FALSE	NA	FALSE	NA	Endoplasmic reticulum;Cytoplasm	Mitochondria;Cytoplasm	Cytoplasm	TRUE
smyd2	myom2	myom2_smyd2	0.362847	2.08234e-06	4.75365e-05	NA	NA	FALSE	NA	FALSE	283	Cytosol	Mitochondria;Cytoplasm		FALSE
carns1	myom2	carns1_myom2	0.50979	4.24974e-12	5.2922e-10	NA	NA	FALSE	NA	FALSE	NA	NA	Mitochondria;Cytoplasm		FALSE
dhdh	myom2	dhdh_myom2	0.326086	2.28967e-05	0.000352092	NA	NA	FALSE	NA	FALSE	NA	Nucleoplasm;Nucleus;Actin filaments;Cytoskeleton	Mitochondria;Cytoplasm		FALSE
cpped1	myom2	cpped1_myom2	0.448158	2.22905e-09	1.32214e-07	NA	NA	FALSE	NA	FALSE	NA	Cytosol	Mitochondria;Cytoplasm		FALSE
tbc1d1	myom2	myom2_tbc1d1	0.334319	1.37376e-05	0.00023061	NA	NA	FALSE	NA	FALSE	NA	Nucleoli;Nucleus	Mitochondria;Cytoplasm		FALSE
itpa	myom2	itpa_myom2	0.549653	3.5947e-14	7.43845e-12	NA	NA	FALSE	NA	FALSE	171	Cytosol	Mitochondria;Cytoplasm		FALSE
chchd3	myom2	chchd3_myom2	0.422064	2.21896e-08	9.76331e-07	NA	NA	FALSE	NA	FALSE	NA	Mitochondria;Cytoplasm	Mitochondria;Cytoplasm	Mitochondria;Cytoplasm	TRUE
pura	myom2	myom2_pura	0.348053	5.66822e-06	0.00011026	NA	NA	FALSE	NA	FALSE	NA	NA	Mitochondria;Cytoplasm		FALSE
gsto1	myom2	gsto1_myom2	0.325712	2.34261e-05	0.000358842	NA	NA	FALSE	NA	FALSE	NA	NA	Mitochondria;Cytoplasm		FALSE
nek9	myom2	myom2_nek9	0.335488	1.27615e-05	0.000216985	NA	NA	FALSE	NA	FALSE	NA	Mitochondria;Cytoplasm	Mitochondria;Cytoplasm	Mitochondria;Cytoplasm	TRUE
nt5c1a	myom2	myom2_nt5c1a	0.314897	4.47895e-05	0.000611535	NA	NA	FALSE	NA	FALSE	NA	NA	Mitochondria;Cytoplasm		FALSE
psmb5	myom2	myom2_psmb5	0.373109	1.009e-06	2.57557e-05	NA	NA	FALSE	NA	FALSE	NA	Nucleus;Centrosome	Mitochondria;Cytoplasm		FALSE
atp1b2	myom2	atp1b2_myom2	0.363098	2.04648e-06	4.68504e-05	NA	NA	FALSE	NA	FALSE	NA	NA	Mitochondria;Cytoplasm		FALSE
mlec	myom2	mlec_myom2	0.342915	7.93247e-06	0.000146009	NA	NA	FALSE	NA	FALSE	NA	NA	Mitochondria;Cytoplasm		FALSE
hdhd2	myom2	hdhd2_myom2	0.62441	6.79802e-19	3.96817e-16	NA	NA	FALSE	NA	FALSE	NA	Vesicles	Mitochondria;Cytoplasm		FALSE
ubac1	myom2	myom2_ubac1	0.52414	8.18965e-13	1.22049e-10	NA	NA	FALSE	NA	FALSE	NA	Cytosol;Plasma membrane	Mitochondria;Cytoplasm		FALSE
nqo2	myom2	myom2_nqo2	0.319333	3.44363e-05	0.000492935	NA	NA	FALSE	NA	FALSE	NA	Cytosol	Mitochondria;Cytoplasm		FALSE
hhatl	myom2	hhatl_myom2	0.473964	1.8829e-10	1.51463e-08	NA	NA	FALSE	NA	FALSE	220	NA	Mitochondria;Cytoplasm		FALSE
ndufb7	myom2	myom2_ndufb7	0.343339	7.71722e-06	0.000142693	NA	NA	FALSE	NA	FALSE	NA	NA	Mitochondria;Cytoplasm		FALSE
hagh	myom2	hagh_myom2	0.364694	1.8312e-06	4.2649e-05	NA	NA	FALSE	NA	FALSE	NA	NA	Mitochondria;Cytoplasm		FALSE
ykt6	myom2	myom2_ykt6	0.440932	4.29522e-09	2.34565e-07	NA	NA	FALSE	NA	FALSE	NA	Cytosol	Mitochondria;Cytoplasm		FALSE
otub1	myom2	myom2_otub1	0.63805	6.73873e-20	4.80818e-17	NA	NA	FALSE	NA	FALSE	NA	Nucleus;Cytosol	Mitochondria;Cytoplasm		FALSE
cisd1	myom2	cisd1_myom2	0.597063	5.04862e-17	1.98146e-14	NA	NA	FALSE	NA	FALSE	NA	Mitochondria;Cytoplasm	Mitochondria;Cytoplasm	Mitochondria;Cytoplasm	TRUE
prkag1	myom2	myom2_prkag1	0.531401	3.45501e-13	5.65256e-11	NA	NA	FALSE	NA	FALSE	NA	Nucleoplasm;Nucleus;Cytosol	Mitochondria;Cytoplasm		FALSE
kyat1	myom2	kyat1_myom2	0.459087	8.02554e-10	5.41273e-08	NA	NA	FALSE	NA	FALSE	NA	NA	Mitochondria;Cytoplasm		FALSE
sod1	myom2	myom2_sod1	0.413811	4.41157e-08	1.76816e-06	NA	NA	FALSE	NA	FALSE	186	Nucleus;Cytosol;Plasma membrane	Mitochondria;Cytoplasm		FALSE
nae1	myom2	myom2_nae1	0.423176	2.01981e-08	9.00489e-07	NA	NA	FALSE	NA	FALSE	NA	Nucleus	Mitochondria;Cytoplasm		FALSE
tapt1	myom2	myom2_tapt1	0.31326	4.93001e-05	0.000661519	NA	NA	FALSE	NA	FALSE	NA	Vesicles	Mitochondria;Cytoplasm		FALSE
impad1	myom2	impad1_myom2	0.470654	2.6154e-10	2.02191e-08	NA	NA	FALSE	NA	FALSE	NA	Golgi apparatus;Cytoplasm	Mitochondria;Cytoplasm	Cytoplasm	TRUE
crot	myom2	crot_myom2	0.57945	6.56026e-16	2.01923e-13	NA	NA	FALSE	NA	FALSE	NA	Vesicles	Mitochondria;Cytoplasm		FALSE
sun1	myom2	myom2_sun1	0.505374	6.94691e-12	8.19138e-10	NA	NA	FALSE	NA	FALSE	NA	Nuclear membrane;Nucleus	Mitochondria;Cytoplasm		FALSE
sypl2	myom2	myom2_sypl2	0.464627	4.71567e-10	3.39401e-08	NA	NA	FALSE	NA	FALSE	NA	Nucleoplasm;Nucleus	Mitochondria;Cytoplasm		FALSE
cops6	myom2	cops6_myom2	0.419174	2.82853e-08	1.20494e-06	NA	NA	FALSE	NA	FALSE	NA	Nucleoplasm;Nucleus	Mitochondria;Cytoplasm		FALSE
mapk9	myom2	mapk9_myom2	0.474617	1.76404e-10	1.43004e-08	NA	NA	FALSE	NA	FALSE	236	NA	Mitochondria;Cytoplasm		FALSE
mdp1	myom2	mdp1_myom2	0.491129	3.23428e-11	3.19968e-09	NA	NA	FALSE	NA	FALSE	NA	Nucleoplasm;Nucleus	Mitochondria;Cytoplasm		FALSE
psma4	myom2	myom2_psma4	0.374574	9.07944e-07	2.35541e-05	NA	NA	FALSE	NA	FALSE	NA	Nucleus;Cytosol	Mitochondria;Cytoplasm		FALSE
arih1	myom2	arih1_myom2	0.332585	1.53173e-05	0.000252506	NA	NA	FALSE	NA	FALSE	NA	Golgi apparatus;Cytoplasm	Mitochondria;Cytoplasm	Cytoplasm	TRUE
akr7a5	myom2	akr7a5_myom2	0.428674	1.26254e-08	5.99496e-07	NA	NA	FALSE	NA	FALSE	NA	NA	Mitochondria;Cytoplasm		FALSE
ube2l3	myom2	myom2_ube2l3	0.636879	8.25543e-20	5.77669e-17	NA	NA	FALSE	NA	FALSE	NA	Nucleus;Cytosol	Mitochondria;Cytoplasm		FALSE
ndufs8	myom2	myom2_ndufs8	0.314712	4.52805e-05	0.000617011	NA	NA	FALSE	NA	FALSE	NA	Mitochondria;Cytoplasm	Mitochondria;Cytoplasm	Mitochondria;Cytoplasm	TRUE
vapa	myom2	myom2_vapa	0.370683	1.20025e-06	2.98388e-05	NA	NA	FALSE	NA	FALSE	NA	Endoplasmic reticulum;Cytoplasm	Mitochondria;Cytoplasm	Cytoplasm	TRUE
bpgm	myom2	bpgm_myom2	0.339419	9.9372e-06	0.000176229	NA	NA	FALSE	NA	FALSE	NA	Nucleoli;Nucleus	Mitochondria;Cytoplasm		FALSE
setd7	myom2	myom2_setd7	0.324184	2.57113e-05	0.000387513	NA	NA	FALSE	NA	FALSE	212	Nucleoli;Nucleus	Mitochondria;Cytoplasm		FALSE
prkcq	myom2	myom2_prkcq	0.356194	3.28734e-06	6.98378e-05	NA	NA	FALSE	NA	FALSE	NA	Microtubule organizing center;Cytoskeleton	Mitochondria;Cytoplasm		FALSE
eloc	myom2	eloc_myom2	0.329896	1.81093e-05	0.000290021	NA	NA	FALSE	NA	FALSE	NA	NA	Mitochondria;Cytoplasm		FALSE
apip	myom2	apip_myom2	0.420511	2.52882e-08	1.09353e-06	NA	NA	FALSE	NA	FALSE	NA	Nucleoplasm;Nucleus	Mitochondria;Cytoplasm		FALSE
stk38	myom2	myom2_stk38	0.462464	5.81009e-10	4.07666e-08	NA	NA	FALSE	NA	FALSE	180	Cytosol	Mitochondria;Cytoplasm		FALSE
sgcd	myom2	myom2_sgcd	0.387902	3.39493e-07	1.01929e-05	NA	NA	FALSE	NA	FALSE	NA	NA	Mitochondria;Cytoplasm		FALSE
nek7	myom2	myom2_nek7	0.416852	3.43187e-08	1.42403e-06	NA	NA	FALSE	NA	FALSE	NA	Nucleoplasm;Nucleus	Mitochondria;Cytoplasm		FALSE
phpt1	myom2	myom2_phpt1	0.442196	3.83413e-09	2.12367e-07	NA	NA	FALSE	NA	FALSE	NA	Cytosol	Mitochondria;Cytoplasm		FALSE
prmt1	myom2	myom2_prmt1	0.439453	4.90339e-09	2.63226e-07	NA	NA	FALSE	NA	FALSE	189	Nucleoplasm;Nucleus	Mitochondria;Cytoplasm		FALSE
mettl26	myom2	mettl26_myom2	0.400211	1.31579e-07	4.52504e-06	NA	NA	FALSE	NA	FALSE	NA	NA	Mitochondria;Cytoplasm		FALSE
psmb7	myom2	myom2_psmb7	0.359459	2.63073e-06	5.78972e-05	NA	NA	FALSE	NA	FALSE	NA	Nucleoplasm;Nucleus	Mitochondria;Cytoplasm		FALSE
tatdn1	myom2	myom2_tatdn1	0.371788	1.10919e-06	2.79065e-05	NA	NA	FALSE	NA	FALSE	NA	Nucleoplasm;Nucleus	Mitochondria;Cytoplasm		FALSE
thnsl2	myom2	myom2_thnsl2	0.443415	3.43445e-09	1.92958e-07	NA	NA	FALSE	NA	FALSE	NA	NA	Mitochondria;Cytoplasm		FALSE
nutf2	myom2	myom2_nutf2	0.640152	4.67116e-20	3.43695e-17	NA	NA	FALSE	NA	FALSE	NA	Microtubules	Mitochondria;Cytoplasm		FALSE
fnta	myom2	fnta_myom2	0.512121	3.26934e-12	4.19144e-10	NA	NA	FALSE	NA	FALSE	NA	Cytosol	Mitochondria;Cytoplasm		FALSE
slc37a4	myom2	myom2_slc37a4	0.345807	6.57007e-06	0.000124765	NA	NA	FALSE	NA	FALSE	NA	Mitochondria;Cytoplasm	Mitochondria;Cytoplasm	Mitochondria;Cytoplasm	TRUE
psma3	myom2	myom2_psma3	0.343439	7.66731e-06	0.000141917	NA	NA	FALSE	NA	FALSE	NA	NA	Mitochondria;Cytoplasm		FALSE
acp1	myom2	acp1_myom2	0.314663	4.54112e-05	0.000618456	NA	NA	FALSE	NA	FALSE	NA	Nucleus	Mitochondria;Cytoplasm		FALSE
acp1	myom2	acp1_myom2	0.314663	4.54112e-05	0.000618456	NA	NA	FALSE	NA	FALSE	NA	Nucleus	Mitochondria;Cytoplasm		FALSE
dpp9	myom2	dpp9_myom2	0.309446	6.15184e-05	0.000792579	NA	NA	FALSE	NA	FALSE	NA	Cytosol	Mitochondria;Cytoplasm		FALSE
eml2	myom2	eml2_myom2	0.38812	3.33974e-07	1.00497e-05	NA	NA	FALSE	NA	FALSE	NA	Vesicles	Mitochondria;Cytoplasm		FALSE
clic5	myom2	clic5_myom2	0.39859	1.49398e-07	5.04788e-06	NA	NA	FALSE	NA	FALSE	NA	Plasma membrane	Mitochondria;Cytoplasm		FALSE
lypla1	myom2	lypla1_myom2	0.605006	1.50767e-17	6.62208e-15	NA	NA	FALSE	NA	FALSE	NA	Cytosol	Mitochondria;Cytoplasm		FALSE
cops8	myom2	cops8_myom2	0.305142	7.86958e-05	0.000968985	NA	NA	FALSE	NA	FALSE	NA	Nucleoplasm;Nucleus	Mitochondria;Cytoplasm		FALSE
prps1l3	myom2	myom2_prps1l3	0.628607	3.37922e-19	2.09207e-16	NA	NA	FALSE	NA	FALSE	NA	NA	Mitochondria;Cytoplasm		FALSE
faf1	myom2	faf1_myom2	0.304641	8.09649e-05	0.000991707	NA	NA	FALSE	NA	FALSE	NA	Nucleus	Mitochondria;Cytoplasm		FALSE
ube2k	myom2	myom2_ube2k	0.317435	3.85565e-05	0.000540773	NA	NA	FALSE	NA	FALSE	NA	Cytosol	Mitochondria;Cytoplasm		FALSE
ube2n	myom2	myom2_ube2n	0.556322	1.51873e-14	3.43388e-12	NA	NA	FALSE	NA	FALSE	NA	Nucleus	Mitochondria;Cytoplasm		FALSE
rrm1	myom2	myom2_rrm1	0.356537	3.21165e-06	6.84858e-05	NA	NA	FALSE	NA	FALSE	NA	Cytosol	Mitochondria;Cytoplasm		FALSE
pfn2	myom2	myom2_pfn2	0.591283	1.19167e-16	4.32367e-14	NA	NA	FALSE	NA	FALSE	NA	NA	Mitochondria;Cytoplasm		FALSE
clcn1	myom2	clcn1_myom2	0.468272	3.30613e-10	2.48414e-08	NA	NA	FALSE	NA	FALSE	NA	NA	Mitochondria;Cytoplasm		FALSE
ndufs4	myom2	myom2_ndufs4	0.345165	6.85185e-06	0.000129239	NA	NA	FALSE	NA	FALSE	NA	Mitochondria;Cytoplasm	Mitochondria;Cytoplasm	Mitochondria;Cytoplasm	TRUE
asph	myom2	asph_myom2	0.493277	2.57635e-11	2.61373e-09	NA	NA	FALSE	NA	FALSE	NA	Endoplasmic reticulum;Cytoplasm	Mitochondria;Cytoplasm	Cytoplasm	TRUE
asph	myom2	asph_myom2	0.493277	2.57635e-11	2.61373e-09	NA	NA	FALSE	NA	FALSE	NA	Endoplasmic reticulum;Cytoplasm	Mitochondria;Cytoplasm	Cytoplasm	TRUE
asph	myom2	asph_myom2	0.493277	2.57635e-11	2.61373e-09	NA	NA	FALSE	NA	FALSE	NA	Endoplasmic reticulum;Cytoplasm	Mitochondria;Cytoplasm	Cytoplasm	TRUE
tecr	myom2	myom2_tecr	0.711559	2.63251e-26	6.03585e-23	NA	NA	FALSE	NA	FALSE	NA	Endoplasmic reticulum;Cytoplasm	Mitochondria;Cytoplasm	Cytoplasm	TRUE
isoc1	myom2	isoc1_myom2	0.465052	4.52508e-10	3.2736e-08	NA	NA	FALSE	NA	FALSE	NA	Endoplasmic reticulum;Cytoplasm;Vesicles	Mitochondria;Cytoplasm	Cytoplasm	TRUE
parvb	myom2	myom2_parvb	0.410623	5.7246e-08	2.21295e-06	NA	NA	FALSE	NA	FALSE	NA	Cytosol	Mitochondria;Cytoplasm		FALSE
ano10	myom2	ano10_myom2	0.363552	1.9829e-06	4.56211e-05	NA	NA	FALSE	NA	FALSE	NA	NA	Mitochondria;Cytoplasm		FALSE
mospd1	myom2	mospd1_myom2	0.507601	5.42665e-12	6.5746e-10	NA	NA	FALSE	NA	FALSE	NA	Nucleoplasm;Nucleus;Vesicles	Mitochondria;Cytoplasm		FALSE
gsk3b	myom2	gsk3b_myom2	0.369623	1.2942e-06	3.17993e-05	NA	NA	FALSE	NA	FALSE	NA	Nucleus	Mitochondria;Cytoplasm		FALSE
psmb3	myom2	myom2_psmb3	0.506144	6.37963e-12	7.59423e-10	NA	NA	FALSE	NA	FALSE	NA	NA	Mitochondria;Cytoplasm		FALSE
psmb6	myom2	myom2_psmb6	0.394009	2.13154e-07	6.84974e-06	NA	NA	FALSE	NA	FALSE	NA	Nucleoplasm;Nucleus	Mitochondria;Cytoplasm		FALSE
rnpep	myom2	myom2_rnpep	0.318428	3.63465e-05	0.000515331	NA	NA	FALSE	NA	FALSE	NA	Golgi apparatus;Cytoplasm	Mitochondria;Cytoplasm	Cytoplasm	TRUE
psmb2	myom2	myom2_psmb2	0.381942	5.29942e-07	1.49011e-05	NA	NA	FALSE	NA	FALSE	NA	Nucleoplasm;Nucleus	Mitochondria;Cytoplasm		FALSE
sdr39u1	myom2	myom2_sdr39u1	0.419604	2.7286e-08	1.16775e-06	NA	NA	FALSE	NA	FALSE	NA	Nucleoplasm;Nucleus;Cytosol	Mitochondria;Cytoplasm		FALSE
gstk1	myom2	gstk1_myom2	0.303551	8.61128e-05	0.00104284	NA	NA	FALSE	NA	FALSE	NA	Vesicles	Mitochondria;Cytoplasm		FALSE
epdr1	myom2	epdr1_myom2	0.437163	6.01097e-09	3.14287e-07	NA	NA	FALSE	NA	FALSE	NA	NA	Mitochondria;Cytoplasm		FALSE
pdcd5	myom2	myom2_pdcd5	0.427603	1.38453e-08	6.49355e-07	NA	NA	FALSE	NA	FALSE	NA	Cytosol	Mitochondria;Cytoplasm		FALSE
ube2m	myom2	myom2_ube2m	0.531524	3.40425e-13	5.57933e-11	NA	NA	FALSE	NA	FALSE	NA	Nucleus	Mitochondria;Cytoplasm		FALSE
inmt	myom2	inmt_myom2	0.418698	2.94323e-08	1.24728e-06	NA	NA	FALSE	NA	FALSE	NA	Golgi apparatus;Cytoplasm;Vesicles	Mitochondria;Cytoplasm	Cytoplasm	TRUE
ndufa6	myom2	myom2_ndufa6	0.32893	1.92241e-05	0.000304662	NA	NA	FALSE	NA	FALSE	NA	NA	Mitochondria;Cytoplasm		FALSE
rras2	myom2	myom2_rras2	0.335213	1.2985e-05	0.000220105	NA	NA	FALSE	NA	FALSE	NA	Nucleus;Cytosol	Mitochondria;Cytoplasm		FALSE
hspbp1	myom2	hspbp1_myom2	0.396113	1.81175e-07	5.95718e-06	NA	NA	FALSE	NA	FALSE	NA	Cytosol	Mitochondria;Cytoplasm		FALSE
gstm4	myom2	gstm4_myom2	0.311412	5.49048e-05	0.00072229	NA	NA	FALSE	NA	FALSE	NA	Mitochondria;Cytoplasm	Mitochondria;Cytoplasm	Mitochondria;Cytoplasm	TRUE
epm2a	myom2	epm2a_myom2	0.416608	3.50229e-08	1.44909e-06	NA	NA	FALSE	NA	FALSE	NA	Nucleoplasm;Nucleus	Mitochondria;Cytoplasm		FALSE
tfam	myom2	myom2_tfam	0.313255	4.93161e-05	0.00066169	NA	NA	FALSE	NA	FALSE	NA	Mitochondria;Cytoplasm	Mitochondria;Cytoplasm	Mitochondria;Cytoplasm	TRUE
fn3k	myom2	fn3k_myom2	0.632898	1.63538e-19	1.07696e-16	NA	NA	FALSE	NA	FALSE	NA	Mitochondria;Cytoplasm	Mitochondria;Cytoplasm	Mitochondria;Cytoplasm	TRUE
prmt5	myom2	myom2_prmt5	0.382036	5.26277e-07	1.4813e-05	NA	NA	FALSE	NA	FALSE	NA	Nucleus;Cytosol	Mitochondria;Cytoplasm		FALSE
ndufc2	myom2	myom2_ndufc2	0.339522	9.87185e-06	0.00017527	NA	NA	FALSE	NA	FALSE	NA	Mitochondria;Cytoplasm	Mitochondria;Cytoplasm	Mitochondria;Cytoplasm	TRUE
armt1	myom2	armt1_myom2	0.419883	2.66551e-08	1.14457e-06	NA	NA	FALSE	NA	FALSE	NA	Nucleus;Nuclear bodies;Nucleoplasm;Cytosol	Mitochondria;Cytoplasm		FALSE
ndufa3	myom2	myom2_ndufa3	0.329642	1.83964e-05	0.000293808	NA	NA	FALSE	NA	FALSE	NA	NA	Mitochondria;Cytoplasm		FALSE
cuta	myom2	cuta_myom2	0.519823	1.35501e-12	1.91346e-10	NA	NA	FALSE	NA	FALSE	NA	Focal Adhesions;Plasma membrane	Mitochondria;Cytoplasm		FALSE
isoc2a	myom2	isoc2a_myom2	0.303944	8.42248e-05	0.00102413	NA	NA	FALSE	NA	FALSE	NA	NA	Mitochondria;Cytoplasm		FALSE
micos13	myom2	micos13_myom2	0.410445	5.80782e-08	2.2409e-06	NA	NA	FALSE	NA	FALSE	NA	NA	Mitochondria;Cytoplasm		FALSE
ptpa	myom2	myom2_ptpa	0.314747	4.5187e-05	0.000615948	NA	NA	FALSE	NA	FALSE	NA	NA	Mitochondria;Cytoplasm		FALSE
camk1	myom2	camk1_myom2	0.313958	4.73292e-05	0.000639754	NA	NA	FALSE	NA	FALSE	NA	Cytosol	Mitochondria;Cytoplasm		FALSE
dnase1l1	myom2	dnase1l1_myom2	0.381848	5.33653e-07	1.49899e-05	NA	NA	FALSE	NA	FALSE	NA	NA	Mitochondria;Cytoplasm		FALSE
nudt16	myom2	myom2_nudt16	0.444376	3.1483e-09	1.78839e-07	NA	NA	FALSE	NA	FALSE	NA	Nucleus;Nucleoli	Mitochondria;Cytoplasm		FALSE
cyb5b	cmya5	cmya5_cyb5b	0.313588	4.83653e-05	0.000651161	NA	NA	FALSE	NA	FALSE	NA	Endoplasmic reticulum;Cytoplasm	NA		FALSE
ndufaf1	cmya5	cmya5_ndufaf1	0.334484	1.35959e-05	0.000228647	NA	NA	FALSE	NA	FALSE	NA	Cytosol	NA		FALSE
akr1e1	cmya5	akr1e1_cmya5	0.313309	4.91597e-05	0.000659981	NA	NA	FALSE	NA	FALSE	NA	NA	NA		FALSE
gart	myh3	gart_myh3	0.326235	2.26896e-05	0.000349438	NA	NA	FALSE	NA	FALSE	NA	Nucleoplasm;Nucleus;Cytosol;Mitochondria;Cytoplasm	NA		FALSE
ubxn1	myh3	myh3_ubxn1	0.325059	2.43778e-05	0.000370797	NA	NA	FALSE	NA	FALSE	NA	Nucleoplasm;Nucleus	NA		FALSE
sirt2	myh3	myh3_sirt2	0.346042	6.46944e-06	0.000123159	NA	NA	FALSE	NA	FALSE	NA	Nucleoli;Nucleus	NA		FALSE
carns1	myh3	carns1_myh3	0.321817	2.967e-05	0.000436065	NA	NA	FALSE	NA	FALSE	NA	NA	NA		FALSE
npepl1	myh3	myh3_npepl1	0.392094	2.46901e-07	7.76641e-06	NA	NA	FALSE	NA	FALSE	NA	Nucleoplasm;Nucleus	NA		FALSE
klc2	myh3	klc2_myh3	0.388622	3.21521e-07	9.72943e-06	NA	NA	FALSE	NA	FALSE	178	Cytosol;Plasma membrane	NA		FALSE
nfs1	myh3	myh3_nfs1	0.320069	3.29544e-05	0.000475443	NA	NA	FALSE	NA	FALSE	NA	Nucleoplasm;Nucleus;Cytosol	NA		FALSE
ndufb8	myh3	myh3_ndufb8	0.361989	2.20993e-06	4.99813e-05	NA	NA	FALSE	NA	FALSE	NA	Mitochondria;Cytoplasm	NA		FALSE
mri1	myh3	mri1_myh3	0.315215	4.39608e-05	0.000602316	NA	NA	FALSE	NA	FALSE	NA	Nucleoplasm;Nucleus;Nucleoli;Nucleus (Fibrillar center);Cytosol	NA		FALSE
ubr3	myh3	myh3_ubr3	0.316512	4.07234e-05	0.000565551	NA	NA	FALSE	NA	FALSE	NA	Nucleus;Nucleoli	NA		FALSE
fem1a	myh3	fem1a_myh3	0.30655	7.26367e-05	0.000907682	NA	NA	FALSE	NA	FALSE	NA	Nucleus;Golgi apparatus;Cytoplasm	NA		FALSE
mettl26	myh3	mettl26_myh3	0.434039	7.91735e-09	3.99416e-07	NA	NA	FALSE	NA	FALSE	NA	NA	NA		FALSE
ube2v2	myh3	myh3_ube2v2	0.30362	8.57766e-05	0.00103956	NA	NA	FALSE	NA	FALSE	NA	Nucleoplasm;Nucleus	NA		FALSE
tomm22	myh3	myh3_tomm22	0.317453	3.85145e-05	0.000540287	NA	NA	FALSE	NA	FALSE	NA	Mitochondria;Cytoplasm	NA		FALSE
ubxn6	myh3	myh3_ubxn6	0.313724	4.79817e-05	0.000646969	NA	NA	FALSE	NA	FALSE	NA	Golgi apparatus;Cytoplasm;Cytosol	NA		FALSE
vps37c	myh3	myh3_vps37c	0.327824	2.05817e-05	0.000322416	NA	NA	FALSE	NA	FALSE	NA	Vesicles	NA		FALSE
dupd1	myh3	dupd1_myh3	0.364896	1.80549e-06	4.2145e-05	NA	NA	FALSE	NA	FALSE	NA	NA	NA		FALSE
phospho1	myh3	myh3_phospho1	0.340882	9.0459e-06	0.000162946	NA	NA	FALSE	NA	FALSE	NA	NA	NA		FALSE
vps26b	myh3	myh3_vps26b	0.304057	8.36877e-05	0.0010189	NA	NA	FALSE	NA	FALSE	NA	NA	NA		FALSE
gmppa	myh3	gmppa_myh3	0.310447	5.80647e-05	0.000756148	NA	NA	FALSE	NA	FALSE	NA	Nucleoplasm;Nucleus	NA		FALSE
aup1	myh3	aup1_myh3	0.31166	5.41195e-05	0.000713847	NA	NA	FALSE	NA	FALSE	NA	Nucleoplasm;Nucleus;Vesicles	NA		FALSE
mtfr1l	myh3	mtfr1l_myh3	0.311621	5.42438e-05	0.000715183	NA	NA	FALSE	NA	FALSE	NA	Mitochondria;Cytoplasm	NA		FALSE
nhlrc2	myh3	myh3_nhlrc2	0.306751	7.18066e-05	0.000899183	NA	NA	FALSE	NA	FALSE	NA	Nucleoplasm;Nucleus	NA		FALSE
slc25a31	myh3	myh3_slc25a31	0.313608	4.83092e-05	0.00065055	NA	NA	FALSE	NA	FALSE	NA	Mitochondria;Cytoplasm	NA		FALSE
cnpy2	myh3	cnpy2_myh3	0.301074	9.89739e-05	0.00116794	NA	NA	FALSE	NA	FALSE	NA	Cytosol	NA		FALSE
ntpcr	myh3	myh3_ntpcr	0.377474	7.35727e-07	1.97034e-05	NA	NA	FALSE	NA	FALSE	155	Cytosol	NA		FALSE
acsf3	myh3	acsf3_myh3	0.359725	2.5832e-06	5.70173e-05	NA	NA	FALSE	NA	FALSE	NA	NA	NA		FALSE
slc44a2	myh3	myh3_slc44a2	0.388314	3.29113e-07	9.92513e-06	NA	NA	FALSE	NA	FALSE	NA	Vesicles;Cell Junctions	NA		FALSE
lamb2	sptan1	lamb2_sptan1	0.30767	6.8129e-05	0.000861348	NA	NA	FALSE	NA	FALSE	NA	Vesicles	Vesicles;Microtubules	Vesicles	TRUE
ldb3	sptan1	ldb3_sptan1	0.331067	1.68384e-05	0.000273092	NA	NA	FALSE	NA	FALSE	NA	Focal Adhesions;Cytosol	Vesicles;Microtubules		FALSE
ldb3	sptan1	ldb3_sptan1	0.331067	1.68384e-05	0.000273092	NA	NA	FALSE	NA	FALSE	NA	Focal Adhesions;Cytosol	Vesicles;Microtubules		FALSE
ddx19b	sptan1	ddx19b_sptan1	0.421323	2.36182e-08	1.03069e-06	NA	NA	FALSE	NA	FALSE	NA	Nucleoplasm;Nucleus	Vesicles;Microtubules		FALSE
arf2	sptan1	arf2_sptan1	0.321021	3.11252e-05	0.000453597	NA	NA	FALSE	NA	FALSE	NA	NA	Vesicles;Microtubules		FALSE
rad23a	sptan1	rad23a_sptan1	0.323203	2.7288e-05	0.000407024	NA	NA	FALSE	NA	FALSE	NA	Nucleoplasm;Nucleus	Vesicles;Microtubules		FALSE
rad23a	sptan1	rad23a_sptan1	0.323203	2.7288e-05	0.000407024	NA	NA	FALSE	NA	FALSE	NA	Nucleoplasm;Nucleus	Vesicles;Microtubules		FALSE
sbsn	sptan1	sbsn_sptan1	0.331612	1.62772e-05	0.000265566	NA	NA	FALSE	NA	FALSE	NA	Vesicles	Vesicles;Microtubules	Vesicles	TRUE
aldh1l1	sptan1	aldh1l1_sptan1	0.317866	3.75825e-05	0.000529637	NA	NA	FALSE	NA	FALSE	NA	Cytosol	Vesicles;Microtubules		FALSE
myl9	sptan1	myl9_sptan1	0.30573	7.61083e-05	0.000942955	NA	NA	FALSE	NA	FALSE	360	Nucleus;Nucleoli;Nucleus (Fibrillar center)	Vesicles;Microtubules		FALSE
ctnnd1	sptan1	ctnnd1_sptan1	0.311403	5.49326e-05	0.000722598	NA	NA	FALSE	NA	FALSE	171	Plasma membrane	Vesicles;Microtubules		FALSE
ndufv3	sptan1	ndufv3_sptan1	0.304935	7.96249e-05	0.00097828	NA	NA	FALSE	NA	FALSE	NA	Mitochondria;Cytoplasm	Vesicles;Microtubules		FALSE
ndufv3	sptan1	ndufv3_sptan1	0.304935	7.96249e-05	0.00097828	NA	NA	FALSE	NA	FALSE	NA	Mitochondria;Cytoplasm	Vesicles;Microtubules		FALSE
sfxn3	sptan1	sfxn3_sptan1	0.39032	2.82687e-07	8.71649e-06	NA	NA	FALSE	NA	FALSE	416	Mitochondria;Cytoplasm	Vesicles;Microtubules		FALSE
krt35	sptan1	krt35_sptan1	0.329037	1.90975e-05	0.000302992	NA	NA	FALSE	NA	FALSE	NA	NA	Vesicles;Microtubules		FALSE
acsf2	sptan1	acsf2_sptan1	0.35345	3.95661e-06	8.15941e-05	NA	NA	FALSE	NA	FALSE	NA	Nucleoplasm;Nucleus;Cytosol	Vesicles;Microtubules		FALSE
atp6v0a1	sptan1	atp6v0a1_sptan1	0.402085	1.13513e-07	3.98723e-06	NA	NA	FALSE	NA	FALSE	NA	Golgi apparatus;Cytoplasm;Vesicles	Vesicles;Microtubules	Vesicles	TRUE
itga6	sptan1	itga6_sptan1	0.431518	9.86858e-09	4.84069e-07	NA	NA	FALSE	NA	FALSE	NA	NA	Vesicles;Microtubules		FALSE
dnm1	sptan1	dnm1_sptan1	0.464036	4.99299e-10	3.56871e-08	NA	NA	FALSE	NA	FALSE	243	Nucleoplasm;Nucleus	Vesicles;Microtubules		FALSE
ndrg1	sptan1	ndrg1_sptan1	0.348347	5.55926e-06	0.000108472	NA	NA	FALSE	NA	FALSE	NA	Cytosol	Vesicles;Microtubules		FALSE
krt16	sptan1	krt16_sptan1	0.410427	5.81646e-08	2.24377e-06	NA	NA	FALSE	NA	FALSE	NA	Intermediate filaments	Vesicles;Microtubules		FALSE
uchl1	sptan1	sptan1_uchl1	0.333266	1.46773e-05	0.000243727	NA	NA	FALSE	NA	FALSE	248	Cytosol	Vesicles;Microtubules		FALSE
nif3l1	sptan1	nif3l1_sptan1	0.326182	2.27623e-05	0.000350383	NA	NA	FALSE	NA	FALSE	NA	Vesicles	Vesicles;Microtubules	Vesicles	TRUE
ucp1	sptan1	sptan1_ucp1	0.31169	5.40258e-05	0.00071283	NA	NA	FALSE	NA	FALSE	318	NA	Vesicles;Microtubules		FALSE
vasp	sptan1	sptan1_vasp	0.314026	4.71399e-05	0.000637658	NA	NA	FALSE	NA	FALSE	196	Focal Adhesions;Cell Junctions;Plasma membrane	Vesicles;Microtubules		FALSE
zyx	sptan1	sptan1_zyx	0.373778	9.61558e-07	2.47253e-05	NA	NA	FALSE	NA	FALSE	225	Focal Adhesions	Vesicles;Microtubules		FALSE
arpc5	sptan1	arpc5_sptan1	0.344611	7.104e-06	0.000133177	NA	NA	FALSE	NA	FALSE	227	Vesicles;Cell Junctions;Cytosol;Plasma membrane	Vesicles;Microtubules	Vesicles	TRUE
ermp1	sptan1	ermp1_sptan1	0.486797	5.09176e-11	4.77622e-09	NA	NA	FALSE	NA	FALSE	NA	Nucleoli;Nucleus	Vesicles;Microtubules		FALSE
rap2b	sptan1	rap2b_sptan1	0.331343	1.65518e-05	0.000269263	NA	NA	FALSE	NA	FALSE	NA	NA	Vesicles;Microtubules		FALSE
elp1	sptan1	elp1_sptan1	0.307885	6.72973e-05	0.000852837	NA	NA	FALSE	NA	FALSE	NA	NA	Vesicles;Microtubules		FALSE
exoc8	sptan1	exoc8_sptan1	0.451198	1.68383e-09	1.03499e-07	NA	NA	FALSE	NA	FALSE	NA	Cytosol	Vesicles;Microtubules		FALSE
bves	sptan1	bves_sptan1	0.306364	7.34093e-05	0.00091556	NA	NA	FALSE	NA	FALSE	NA	Cell Junctions	Vesicles;Microtubules		FALSE
gripap1	sptan1	gripap1_sptan1	0.492648	2.75434e-11	2.77492e-09	NA	NA	FALSE	NA	FALSE	NA	Vesicles;Cytosol	Vesicles;Microtubules	Vesicles	TRUE
rab35	sptan1	rab35_sptan1	0.383485	4.72639e-07	1.35219e-05	NA	NA	FALSE	NA	FALSE	NA	NA	Vesicles;Microtubules		FALSE
nudt19	sptan1	nudt19_sptan1	0.32661	2.21738e-05	0.000342899	NA	NA	FALSE	NA	FALSE	NA	Nucleus;Nucleoli;Cytosol	Vesicles;Microtubules		FALSE
nckap1	sptan1	nckap1_sptan1	0.339349	9.98158e-06	0.000176882	NA	NA	FALSE	NA	FALSE	188	Cytosol	Vesicles;Microtubules		FALSE
vwf	sptan1	sptan1_vwf	0.387578	3.47909e-07	1.04085e-05	NA	NA	FALSE	NA	FALSE	NA	NA	Vesicles;Microtubules		FALSE
afdn	sptan1	afdn_sptan1	0.422472	2.14379e-08	9.47662e-07	NA	NA	FALSE	NA	FALSE	NA	NA	Vesicles;Microtubules		FALSE
ncam1	sptan1	ncam1_sptan1	0.455323	1.14561e-09	7.38978e-08	NA	NA	FALSE	NA	FALSE	936	Plasma membrane	Vesicles;Microtubules		FALSE
oxa1l	sptan1	oxa1l_sptan1	0.376426	7.94007e-07	2.10211e-05	NA	NA	FALSE	NA	FALSE	NA	Mitochondria;Cytoplasm	Vesicles;Microtubules		FALSE
pkp1	sptan1	pkp1_sptan1	0.407306	7.48582e-08	2.78834e-06	NA	NA	FALSE	NA	FALSE	160	Nucleoplasm;Nucleus	Vesicles;Microtubules		FALSE
neb	myh13	myh13_neb	0.310592	5.75768e-05	0.000750962	NA	NA	FALSE	NA	FALSE	568	NA	NA		FALSE
myh4	myh13	myh13_myh4	0.330501	1.74416e-05	0.000281161	NA	NA	FALSE	NA	FALSE	763	NA	NA		FALSE
anxa6	myh13	anxa6_myh13	0.434767	7.42712e-09	3.77801e-07	NA	NA	FALSE	NA	FALSE	NA	Nuclear speckles;Nucleoplasm;Nucleus	NA		FALSE
anxa6	myh13	anxa6_myh13	0.434767	7.42712e-09	3.77801e-07	NA	NA	FALSE	NA	FALSE	NA	Nuclear speckles;Nucleoplasm;Nucleus	NA		FALSE
lamc1	myh13	lamc1_myh13	0.51986	1.34923e-12	1.90635e-10	NA	NA	FALSE	NA	FALSE	NA	Endoplasmic reticulum;Cytoplasm;Plasma membrane	NA		FALSE
lamb1	myh13	lamb1_myh13	0.471194	2.47943e-10	1.92951e-08	NA	NA	FALSE	NA	FALSE	NA	NA	NA		FALSE
hspa4	myh13	hspa4_myh13	0.305953	7.51522e-05	0.000933188	NA	NA	FALSE	NA	FALSE	182	Nucleoplasm;Nucleus;Cytosol	NA		FALSE
mylpf	myh13	myh13_mylpf	0.457578	9.26153e-10	6.13468e-08	NA	NA	FALSE	NA	FALSE	946	NA	NA		FALSE
trf	myh13	myh13_trf	0.301549	9.63737e-05	0.00114299	NA	NA	FALSE	NA	FALSE	NA	NA	NA		FALSE
pvalb	myh13	myh13_pvalb	0.50483	7.37661e-12	8.63837e-10	NA	NA	FALSE	NA	FALSE	388	Nucleoplasm;Nucleus	NA		FALSE
adssl1	myh13	adssl1_myh13	0.301374	9.73272e-05	0.00115215	NA	NA	FALSE	NA	FALSE	NA	NA	NA		FALSE
casq1	myh13	casq1_myh13	0.334809	1.33206e-05	0.000224788	NA	NA	FALSE	NA	FALSE	164	Nucleoplasm;Nucleus;Mitochondria;Cytoplasm	NA		FALSE
pgam2	myh13	myh13_pgam2	0.359419	2.63801e-06	5.80321e-05	NA	NA	FALSE	NA	FALSE	NA	Nucleus;Nucleoli	NA		FALSE
psmd2	myh13	myh13_psmd2	0.333781	1.42103e-05	0.000237215	NA	NA	FALSE	NA	FALSE	NA	NA	NA		FALSE
tpi1	myh13	myh13_tpi1	0.391837	2.51798e-07	7.89717e-06	NA	NA	FALSE	NA	FALSE	NA	Nucleoplasm;Nucleus	NA		FALSE
cacnb1	myh13	cacnb1_myh13	0.3315	1.63907e-05	0.0002671	NA	NA	FALSE	NA	FALSE	317	NA	NA		FALSE
psmd7	myh13	myh13_psmd7	0.324743	2.48521e-05	0.000376766	NA	NA	FALSE	NA	FALSE	NA	Nucleoplasm;Nucleus	NA		FALSE
ywhah	myh13	myh13_ywhah	0.386722	3.71069e-07	1.10002e-05	NA	NA	FALSE	NA	FALSE	NA	NA	NA		FALSE
sars	myh13	myh13_sars	0.350179	4.92349e-06	9.79995e-05	NA	NA	FALSE	NA	FALSE	NA	Cytosol	NA		FALSE
prune1	myh13	myh13_prune1	0.420579	2.51428e-08	1.08798e-06	NA	NA	FALSE	NA	FALSE	NA	NA	NA		FALSE
sar1a	myh13	myh13_sar1a	0.369463	1.30898e-06	3.2105e-05	NA	NA	FALSE	NA	FALSE	NA	Endoplasmic reticulum;Cytoplasm	NA		FALSE
smyd2	myh13	myh13_smyd2	0.314798	4.50517e-05	0.000614428	NA	NA	FALSE	NA	FALSE	NA	Cytosol	NA		FALSE
rhoa	myh13	myh13_rhoa	0.421989	2.23306e-08	9.81818e-07	NA	NA	FALSE	NA	FALSE	291	Cytosol	NA		FALSE
atp1b1	myh13	atp1b1_myh13	0.337628	1.11414e-05	0.000193812	NA	NA	FALSE	NA	FALSE	NA	NA	NA		FALSE
uba3	myh13	myh13_uba3	0.334361	1.37011e-05	0.000230105	NA	NA	FALSE	NA	FALSE	NA	Cytosol;Plasma membrane	NA		FALSE
ndufa5	myh13	myh13_ndufa5	0.336276	1.21406e-05	0.000208164	NA	NA	FALSE	NA	FALSE	NA	NA	NA		FALSE
itpa	myh13	itpa_myh13	0.326423	2.24298e-05	0.000346124	NA	NA	FALSE	NA	FALSE	NA	Cytosol	NA		FALSE
chchd3	myh13	chchd3_myh13	0.402947	1.06025e-07	3.76028e-06	NA	NA	FALSE	NA	FALSE	NA	Mitochondria;Cytoplasm	NA		FALSE
pura	myh13	myh13_pura	0.309013	6.30721e-05	0.000808928	NA	NA	FALSE	NA	FALSE	NA	NA	NA		FALSE
nme1	myh13	myh13_nme1	0.3545	3.68652e-06	7.69012e-05	NA	NA	FALSE	NA	FALSE	NA	Cytosol	NA		FALSE
skp1a	myh13	myh13_skp1a	0.418722	2.93742e-08	1.24519e-06	NA	NA	FALSE	NA	FALSE	NA	NA	NA		FALSE
preb	myh13	myh13_preb	0.33518	1.30118e-05	0.000220481	NA	NA	FALSE	NA	FALSE	NA	Endoplasmic reticulum;Cytoplasm	NA		FALSE
sypl2	myh13	myh13_sypl2	0.480001	1.02469e-10	8.84913e-09	NA	NA	FALSE	NA	FALSE	NA	Nucleoplasm;Nucleus	NA		FALSE
ube2l3	myh13	myh13_ube2l3	0.383389	4.76039e-07	1.36053e-05	NA	NA	FALSE	NA	FALSE	NA	Nucleus;Cytosol	NA		FALSE
ndufs8	myh13	myh13_ndufs8	0.314498	4.58519e-05	0.000623395	NA	NA	FALSE	NA	FALSE	NA	Mitochondria;Cytoplasm	NA		FALSE
vapa	myh13	myh13_vapa	0.456247	1.05015e-09	6.84782e-08	NA	NA	FALSE	NA	FALSE	NA	Endoplasmic reticulum;Cytoplasm	NA		FALSE
ppp2r5a	myh13	myh13_ppp2r5a	0.325693	2.34535e-05	0.000359198	NA	NA	FALSE	NA	FALSE	NA	Cytosol	NA		FALSE
rps6	myh13	myh13_rps6	0.345856	6.54887e-06	0.000124426	NA	NA	FALSE	NA	FALSE	NA	Endoplasmic reticulum;Cytoplasm;Cytosol	NA		FALSE
rps6-ps4	myh13	myh13_rps6-ps4	0.345856	6.54887e-06	0.000124426	NA	NA	FALSE	NA	FALSE	NA	NA	NA		FALSE
cdc42	myh13	cdc42_myh13	0.554169	2.01e-14	4.41402e-12	NA	NA	FALSE	NA	FALSE	326	Microtubules	NA		FALSE
sgcd	myh13	myh13_sgcd	0.394134	2.11119e-07	6.79356e-06	NA	NA	FALSE	NA	FALSE	NA	NA	NA		FALSE
dstn	myh13	dstn_myh13	0.390785	2.72842e-07	8.45714e-06	NA	NA	FALSE	NA	FALSE	261	NA	NA		FALSE
rac1	myh13	myh13_rac1	0.307661	6.8167e-05	0.000861746	NA	NA	FALSE	NA	FALSE	227	Nucleus;Cytosol	NA		FALSE
agpat3	myh13	agpat3_myh13	0.312288	5.21783e-05	0.000692853	NA	NA	FALSE	NA	FALSE	NA	NA	NA		FALSE
nutf2	myh13	myh13_nutf2	0.36408	1.91129e-06	4.42205e-05	NA	NA	FALSE	NA	FALSE	NA	Microtubules	NA		FALSE
fnta	myh13	fnta_myh13	0.311047	5.60799e-05	0.000735007	NA	NA	FALSE	NA	FALSE	NA	Cytosol	NA		FALSE
uqcrh	myh13	myh13_uqcrh	0.385884	3.95154e-07	1.16075e-05	NA	NA	FALSE	NA	FALSE	NA	NA	NA		FALSE
rap1a	myh13	myh13_rap1a	0.378715	6.7198e-07	1.82389e-05	NA	NA	FALSE	NA	FALSE	181	NA	NA		FALSE
ran	myh13	myh13_ran	0.441254	4.17283e-09	2.28725e-07	NA	NA	FALSE	NA	FALSE	NA	Nucleus	NA		FALSE
clic5	myh13	clic5_myh13	0.301637	9.59014e-05	0.00113841	NA	NA	FALSE	NA	FALSE	NA	Plasma membrane	NA		FALSE
faf1	myh13	faf1_myh13	0.32256	2.83696e-05	0.000420254	NA	NA	FALSE	NA	FALSE	NA	Nucleus	NA		FALSE
ppif	myh13	myh13_ppif	0.414799	4.06707e-08	1.64887e-06	NA	NA	FALSE	NA	FALSE	210	Mitochondria;Cytoplasm	NA		FALSE
pxn	myh13	myh13_pxn	0.318238	3.67602e-05	0.000520186	NA	NA	FALSE	NA	FALSE	230	Focal Adhesions	NA		FALSE
ube2n	myh13	myh13_ube2n	0.310776	5.69683e-05	0.000744547	NA	NA	FALSE	NA	FALSE	NA	Nucleus	NA		FALSE
ndufs4	myh13	myh13_ndufs4	0.355787	3.3793e-06	7.14752e-05	NA	NA	FALSE	NA	FALSE	NA	Mitochondria;Cytoplasm	NA		FALSE
asph	myh13	asph_myh13	0.359534	2.61733e-06	5.76492e-05	NA	NA	FALSE	NA	FALSE	NA	Endoplasmic reticulum;Cytoplasm	NA		FALSE
asph	myh13	asph_myh13	0.359534	2.61733e-06	5.76492e-05	NA	NA	FALSE	NA	FALSE	NA	Endoplasmic reticulum;Cytoplasm	NA		FALSE
asph	myh13	asph_myh13	0.359534	2.61733e-06	5.76492e-05	NA	NA	FALSE	NA	FALSE	NA	Endoplasmic reticulum;Cytoplasm	NA		FALSE
fis1	myh13	fis1_myh13	0.305611	7.66265e-05	0.000948172	NA	NA	FALSE	NA	FALSE	NA	Mitochondria;Cytoplasm	NA		FALSE
parvb	myh13	myh13_parvb	0.39705	1.68469e-07	5.59546e-06	NA	NA	FALSE	NA	FALSE	279	Cytosol	NA		FALSE
atp5k	myh13	atp5k_myh13	0.399309	1.41228e-07	4.80872e-06	NA	NA	FALSE	NA	FALSE	NA	NA	NA		FALSE
chmp4b	myh13	chmp4b_myh13	0.312946	5.02129e-05	0.000671549	NA	NA	FALSE	NA	FALSE	NA	NA	NA		FALSE
pdcd5	myh13	myh13_pdcd5	0.404315	9.51008e-08	3.42424e-06	NA	NA	FALSE	NA	FALSE	NA	Cytosol	NA		FALSE
rpl15	myh13	myh13_rpl15	0.324566	2.51215e-05	0.00038014	NA	NA	FALSE	NA	FALSE	NA	NA	NA		FALSE
col4a1	myh13	col4a1_myh13	0.318546	3.60931e-05	0.000512353	NA	NA	FALSE	NA	FALSE	NA	Nucleoplasm;Nucleus	NA		FALSE
nd5	myh13	myh13_nd5	0.32745	2.10594e-05	0.000328573	NA	NA	FALSE	NA	FALSE	NA	NA	NA		FALSE
nd5	myh13	myh13_nd5	0.32745	2.10594e-05	0.000328573	NA	NA	FALSE	NA	FALSE	NA	NA	NA		FALSE
rras	myh13	myh13_rras	0.306325	7.35759e-05	0.000917261	NA	NA	FALSE	NA	FALSE	181	Vesicles	NA		FALSE
slc16a1	myh13	myh13_slc16a1	0.320336	3.24323e-05	0.000469247	NA	NA	FALSE	NA	FALSE	NA	Cell Junctions;Plasma membrane	NA		FALSE
elob	myh13	elob_myh13	0.450986	1.71717e-09	1.05287e-07	NA	NA	FALSE	NA	FALSE	NA	NA	NA		FALSE
ensa	myh13	ensa_myh13	0.454283	1.26305e-09	8.04916e-08	NA	NA	FALSE	NA	FALSE	NA	Nucleus;Nucleoli	NA		FALSE
cd81	myh13	cd81_myh13	0.393563	2.20597e-07	7.05162e-06	NA	NA	FALSE	NA	FALSE	NA	Plasma membrane	NA		FALSE
ndufb5	myh13	myh13_ndufb5	0.384196	4.48277e-07	1.29277e-05	NA	NA	FALSE	NA	FALSE	NA	Mitochondria;Cytoplasm	NA		FALSE
h1f0	myh13	h1f0_myh13	0.410402	5.8284e-08	2.24763e-06	NA	NA	FALSE	NA	FALSE	NA	Nucleus;Nuclear bodies;Nucleoplasm	NA		FALSE
reep5	myh13	myh13_reep5	0.308199	6.60947e-05	0.000840363	NA	NA	FALSE	NA	FALSE	NA	Endoplasmic reticulum;Cytoplasm	NA		FALSE
hacd1	myh13	hacd1_myh13	0.346445	6.30092e-06	0.000120482	NA	NA	FALSE	NA	FALSE	NA	NA	NA		FALSE
neb	atp2a1	atp2a1_neb	0.721233	2.66196e-27	7.23703e-24	NA	NA	FALSE	NA	FALSE	476	NA	Endoplasmic reticulum;Cytoplasm		FALSE
myh4	atp2a1	atp2a1_myh4	0.77797	4.10633e-34	3.19576e-30	NA	NA	FALSE	NA	FALSE	707	NA	Endoplasmic reticulum;Cytoplasm		FALSE
obscn	atp2a1	atp2a1_obscn	0.34626	6.37792e-06	0.000121709	NA	NA	FALSE	NA	FALSE	295	Cytosol;Plasma membrane	Endoplasmic reticulum;Cytoplasm		FALSE
obscn	atp2a1	atp2a1_obscn	0.34626	6.37792e-06	0.000121709	NA	NA	FALSE	NA	FALSE	295	Cytosol;Plasma membrane	Endoplasmic reticulum;Cytoplasm		FALSE
dmd	atp2a1	atp2a1_dmd	0.632101	1.87286e-19	1.21926e-16	NA	NA	FALSE	NA	FALSE	447	NA	Endoplasmic reticulum;Cytoplasm		FALSE
myom1	atp2a1	atp2a1_myom1	0.640028	4.77339e-20	3.50489e-17	NA	NA	FALSE	NA	FALSE	299	NA	Endoplasmic reticulum;Cytoplasm		FALSE
dync1h1	atp2a1	atp2a1_dync1h1	0.368155	1.43603e-06	3.4723e-05	NA	NA	FALSE	NA	FALSE	NA	Centrosome;Cytosol	Endoplasmic reticulum;Cytoplasm		FALSE
myom2	atp2a1	atp2a1_myom2	0.74127	1.67539e-29	6.49296e-26	NA	NA	FALSE	NA	FALSE	282	Mitochondria;Cytoplasm	Endoplasmic reticulum;Cytoplasm	Cytoplasm	TRUE
myh13	atp2a1	atp2a1_myh13	0.500668	1.1639e-11	1.29417e-09	NA	NA	FALSE	NA	FALSE	374	NA	Endoplasmic reticulum;Cytoplasm		FALSE
ugp2	atp2a1	atp2a1_ugp2	0.315975	4.20351e-05	0.000580451	NA	NA	FALSE	NA	FALSE	NA	Centrosome;Mitochondria;Cytoplasm	Endoplasmic reticulum;Cytoplasm	Cytoplasm	TRUE
gpd2	atp2a1	atp2a1_gpd2	0.333613	1.43608e-05	0.00023931	NA	NA	FALSE	NA	FALSE	NA	NA	Endoplasmic reticulum;Cytoplasm		FALSE
pgm2	atp2a1	atp2a1_pgm2	0.526597	6.12938e-13	9.4341e-11	NA	NA	FALSE	NA	FALSE	NA	Intermediate filaments	Endoplasmic reticulum;Cytoplasm		FALSE
anxa6	atp2a1	anxa6_atp2a1	0.493567	2.49832e-11	2.54325e-09	NA	NA	FALSE	NA	FALSE	NA	Nuclear speckles;Nucleoplasm;Nucleus	Endoplasmic reticulum;Cytoplasm		FALSE
anxa6	atp2a1	anxa6_atp2a1	0.493567	2.49832e-11	2.54325e-09	NA	NA	FALSE	NA	FALSE	NA	Nuclear speckles;Nucleoplasm;Nucleus	Endoplasmic reticulum;Cytoplasm		FALSE
lamc1	atp2a1	atp2a1_lamc1	0.553257	2.26192e-14	4.91158e-12	NA	NA	FALSE	NA	FALSE	NA	Endoplasmic reticulum;Cytoplasm;Plasma membrane	Endoplasmic reticulum;Cytoplasm	Endoplasmic reticulum;Cytoplasm	TRUE
gpi1	atp2a1	atp2a1_gpi1	0.579029	6.96204e-16	2.13022e-13	NA	NA	FALSE	NA	FALSE	NA	NA	Endoplasmic reticulum;Cytoplasm		FALSE
lamb1	atp2a1	atp2a1_lamb1	0.558879	1.08594e-14	2.53862e-12	NA	NA	FALSE	NA	FALSE	NA	NA	Endoplasmic reticulum;Cytoplasm		FALSE
mylpf	atp2a1	atp2a1_mylpf	0.771104	3.4744e-33	2.34052e-29	NA	NA	FALSE	NA	FALSE	824	NA	Endoplasmic reticulum;Cytoplasm		FALSE
ecpas	atp2a1	atp2a1_ecpas	0.316949	3.96821e-05	0.000553655	NA	NA	FALSE	NA	FALSE	NA	NA	Endoplasmic reticulum;Cytoplasm		FALSE
pvalb	atp2a1	atp2a1_pvalb	0.705372	1.0854e-25	2.23537e-22	NA	NA	FALSE	NA	FALSE	755	Nucleoplasm;Nucleus	Endoplasmic reticulum;Cytoplasm		FALSE
aldoart1	atp2a1	aldoart1_atp2a1	0.522181	1.03006e-12	1.4979e-10	NA	NA	FALSE	NA	FALSE	NA	NA	Endoplasmic reticulum;Cytoplasm		FALSE
phkb	atp2a1	atp2a1_phkb	0.429345	1.19155e-08	5.70082e-07	NA	NA	FALSE	NA	FALSE	206	Golgi apparatus;Cytoplasm	Endoplasmic reticulum;Cytoplasm	Cytoplasm	TRUE
adssl1	atp2a1	adssl1_atp2a1	0.725027	1.05523e-27	3.04896e-24	NA	NA	FALSE	NA	FALSE	190	NA	Endoplasmic reticulum;Cytoplasm		FALSE
cacna1s	atp2a1	atp2a1_cacna1s	0.65746	2.04291e-21	1.94723e-18	NA	NA	FALSE	NA	FALSE	690	NA	Endoplasmic reticulum;Cytoplasm		FALSE
synpo2	atp2a1	atp2a1_synpo2	0.347235	5.98185e-06	0.000115342	NA	NA	FALSE	NA	FALSE	NA	Vesicles;Actin filaments;Cytoskeleton;Cytosol	Endoplasmic reticulum;Cytoplasm		FALSE
casq1	atp2a1	atp2a1_casq1	0.771562	3.02007e-33	2.05033e-29	NA	NA	FALSE	NA	FALSE	801	Nucleoplasm;Nucleus;Mitochondria;Cytoplasm	Endoplasmic reticulum;Cytoplasm	Cytoplasm	TRUE
gpd1	atp2a1	atp2a1_gpd1	0.344036	7.3753e-06	0.000137422	NA	NA	FALSE	NA	FALSE	NA	NA	Endoplasmic reticulum;Cytoplasm		FALSE
gys1	atp2a1	atp2a1_gys1	0.505268	7.02896e-12	8.27712e-10	NA	NA	FALSE	NA	FALSE	175	Microtubules;Cytosol	Endoplasmic reticulum;Cytoplasm		FALSE
myoz1	atp2a1	atp2a1_myoz1	0.567367	3.4923e-15	9.14539e-13	NA	NA	FALSE	NA	FALSE	843	NA	Endoplasmic reticulum;Cytoplasm		FALSE
eef1a2	atp2a1	atp2a1_eef1a2	0.382663	5.02374e-07	1.4238e-05	NA	NA	FALSE	NA	FALSE	NA	Nucleoli;Nucleus;Cytosol	Endoplasmic reticulum;Cytoplasm		FALSE
vdac1	atp2a1	atp2a1_vdac1	0.481248	9.02323e-11	7.91022e-09	NA	NA	FALSE	NA	FALSE	319	Cytosol	Endoplasmic reticulum;Cytoplasm		FALSE
rdx	atp2a1	atp2a1_rdx	0.334269	1.37814e-05	0.000231222	NA	NA	FALSE	NA	FALSE	NA	Plasma membrane	Endoplasmic reticulum;Cytoplasm		FALSE
klhl41	atp2a1	atp2a1_klhl41	0.527591	5.44814e-13	8.48998e-11	NA	NA	FALSE	NA	FALSE	168	Cytosol;Plasma membrane	Endoplasmic reticulum;Cytoplasm		FALSE
tmod4	atp2a1	atp2a1_tmod4	0.702324	2.15178e-25	4.21656e-22	NA	NA	FALSE	NA	FALSE	415	NA	Endoplasmic reticulum;Cytoplasm		FALSE
sucla2	atp2a1	atp2a1_sucla2	0.338243	1.07132e-05	0.000187564	NA	NA	FALSE	NA	FALSE	NA	Mitochondria;Cytoplasm	Endoplasmic reticulum;Cytoplasm	Cytoplasm	TRUE
ddb1	atp2a1	atp2a1_ddb1	0.388455	3.25608e-07	9.83572e-06	NA	NA	FALSE	NA	FALSE	NA	Nucleoplasm;Nucleus	Endoplasmic reticulum;Cytoplasm		FALSE
pgam2	atp2a1	atp2a1_pgam2	0.668128	2.67323e-22	2.99083e-19	NA	NA	FALSE	NA	FALSE	465	Nucleus;Nucleoli	Endoplasmic reticulum;Cytoplasm		FALSE
psmd2	atp2a1	atp2a1_psmd2	0.550572	3.19581e-14	6.69919e-12	NA	NA	FALSE	NA	FALSE	NA	NA	Endoplasmic reticulum;Cytoplasm		FALSE
capn1	atp2a1	atp2a1_capn1	0.48208	8.28672e-11	7.33691e-09	NA	NA	FALSE	NA	FALSE	282	Cytosol	Endoplasmic reticulum;Cytoplasm		FALSE
tpi1	atp2a1	atp2a1_tpi1	0.734789	9.07549e-29	3.12276e-25	NA	NA	FALSE	NA	FALSE	NA	Nucleoplasm;Nucleus	Endoplasmic reticulum;Cytoplasm		FALSE
cacnb1	atp2a1	atp2a1_cacnb1	0.764564	2.48178e-32	1.46376e-28	NA	NA	FALSE	NA	FALSE	344	NA	Endoplasmic reticulum;Cytoplasm		FALSE
psmd1	atp2a1	atp2a1_psmd1	0.506593	6.07013e-12	7.26284e-10	NA	NA	FALSE	NA	FALSE	NA	Nucleoplasm;Nucleus	Endoplasmic reticulum;Cytoplasm		FALSE
ppp2r1a	atp2a1	atp2a1_ppp2r1a	0.362572	2.12244e-06	4.83097e-05	NA	NA	FALSE	NA	FALSE	NA	Cytosol	Endoplasmic reticulum;Cytoplasm		FALSE
adsl	atp2a1	adsl_atp2a1	0.500232	1.22035e-11	1.34942e-09	NA	NA	FALSE	NA	FALSE	NA	Cytosol	Endoplasmic reticulum;Cytoplasm		FALSE
ipo5	atp2a1	atp2a1_ipo5	0.344395	7.20503e-06	0.000134756	NA	NA	FALSE	NA	FALSE	NA	Nucleoplasm;Nucleus;Cytosol	Endoplasmic reticulum;Cytoplasm		FALSE
pbxip1	atp2a1	atp2a1_pbxip1	0.405331	8.77007e-08	3.19489e-06	NA	NA	FALSE	NA	FALSE	NA	Vesicles	Endoplasmic reticulum;Cytoplasm		FALSE
eif4g1	atp2a1	atp2a1_eif4g1	0.32759	2.08792e-05	0.000326254	NA	NA	FALSE	NA	FALSE	NA	Cytosol	Endoplasmic reticulum;Cytoplasm		FALSE
gdi2	atp2a1	atp2a1_gdi2	0.638305	6.44648e-20	4.62135e-17	NA	NA	FALSE	NA	FALSE	158	NA	Endoplasmic reticulum;Cytoplasm		FALSE
sugt1	atp2a1	atp2a1_sugt1	0.406387	8.05896e-08	2.97152e-06	NA	NA	FALSE	NA	FALSE	NA	Nucleoplasm;Nucleus;Cytosol	Endoplasmic reticulum;Cytoplasm		FALSE
psmd7	atp2a1	atp2a1_psmd7	0.437048	6.07288e-09	3.17079e-07	NA	NA	FALSE	NA	FALSE	NA	Nucleoplasm;Nucleus	Endoplasmic reticulum;Cytoplasm		FALSE
ywhah	atp2a1	atp2a1_ywhah	0.445306	2.89302e-09	1.66077e-07	NA	NA	FALSE	NA	FALSE	236	NA	Endoplasmic reticulum;Cytoplasm		FALSE
cops3	atp2a1	atp2a1_cops3	0.483037	7.51144e-11	6.72892e-09	NA	NA	FALSE	NA	FALSE	NA	Nucleus	Endoplasmic reticulum;Cytoplasm		FALSE
rab18	atp2a1	atp2a1_rab18	0.506974	5.81898e-12	6.99697e-10	NA	NA	FALSE	NA	FALSE	158	NA	Endoplasmic reticulum;Cytoplasm		FALSE
ndufa12	atp2a1	atp2a1_ndufa12	0.303904	8.44138e-05	0.00102601	NA	NA	FALSE	NA	FALSE	NA	Mitochondria;Cytoplasm	Endoplasmic reticulum;Cytoplasm	Cytoplasm	TRUE
glrx3	atp2a1	atp2a1_glrx3	0.320552	3.20134e-05	0.000464248	NA	NA	FALSE	NA	FALSE	NA	NA	Endoplasmic reticulum;Cytoplasm		FALSE
macrod1	atp2a1	atp2a1_macrod1	0.503608	8.4392e-12	9.73034e-10	NA	NA	FALSE	NA	FALSE	NA	Nucleoplasm;Nucleus	Endoplasmic reticulum;Cytoplasm		FALSE
sars	atp2a1	atp2a1_sars	0.309132	6.26439e-05	0.000804454	NA	NA	FALSE	NA	FALSE	NA	Cytosol	Endoplasmic reticulum;Cytoplasm		FALSE
cobl	atp2a1	atp2a1_cobl	0.463097	5.46691e-10	3.86391e-08	NA	NA	FALSE	NA	FALSE	NA	Cell Junctions;Plasma membrane	Endoplasmic reticulum;Cytoplasm		FALSE
prune1	atp2a1	atp2a1_prune1	0.584062	3.40234e-16	1.11595e-13	NA	NA	FALSE	NA	FALSE	NA	NA	Endoplasmic reticulum;Cytoplasm		FALSE
phykpl	atp2a1	atp2a1_phykpl	0.347533	5.86585e-06	0.000113473	NA	NA	FALSE	NA	FALSE	NA	Mitochondria;Cytoplasm	Endoplasmic reticulum;Cytoplasm	Cytoplasm	TRUE
cab39	atp2a1	atp2a1_cab39	0.49246	2.8097e-11	2.82475e-09	NA	NA	FALSE	NA	FALSE	NA	Nucleoli;Nucleus	Endoplasmic reticulum;Cytoplasm		FALSE
map2k4	atp2a1	atp2a1_map2k4	0.524271	8.06473e-13	1.20393e-10	NA	NA	FALSE	NA	FALSE	NA	Nucleoplasm;Nucleus	Endoplasmic reticulum;Cytoplasm		FALSE
lactb	atp2a1	atp2a1_lactb	0.414862	4.04608e-08	1.64158e-06	NA	NA	FALSE	NA	FALSE	NA	Mitochondria;Cytoplasm	Endoplasmic reticulum;Cytoplasm	Cytoplasm	TRUE
prdx2	atp2a1	atp2a1_prdx2	0.407909	7.13084e-08	2.67387e-06	NA	NA	FALSE	NA	FALSE	NA	NA	Endoplasmic reticulum;Cytoplasm		FALSE
sar1a	atp2a1	atp2a1_sar1a	0.699101	4.39646e-25	8.14813e-22	NA	NA	FALSE	NA	FALSE	NA	Endoplasmic reticulum;Cytoplasm	Endoplasmic reticulum;Cytoplasm	Endoplasmic reticulum;Cytoplasm	TRUE
smyd2	atp2a1	atp2a1_smyd2	0.399673	1.37256e-07	4.69141e-06	NA	NA	FALSE	NA	FALSE	NA	Cytosol	Endoplasmic reticulum;Cytoplasm		FALSE
rhoa	atp2a1	atp2a1_rhoa	0.48171	8.60639e-11	7.58536e-09	NA	NA	FALSE	NA	FALSE	276	Cytosol	Endoplasmic reticulum;Cytoplasm		FALSE
ndufa5	atp2a1	atp2a1_ndufa5	0.311467	5.47309e-05	0.000720434	NA	NA	FALSE	NA	FALSE	NA	NA	Endoplasmic reticulum;Cytoplasm		FALSE
cpped1	atp2a1	atp2a1_cpped1	0.413043	4.6983e-08	1.86668e-06	NA	NA	FALSE	NA	FALSE	171	Cytosol	Endoplasmic reticulum;Cytoplasm		FALSE
chordc1	atp2a1	atp2a1_chordc1	0.349288	5.22337e-06	0.000102972	NA	NA	FALSE	NA	FALSE	NA	Cytosol	Endoplasmic reticulum;Cytoplasm		FALSE
ccdc47	atp2a1	atp2a1_ccdc47	0.454581	1.22828e-09	7.85289e-08	NA	NA	FALSE	NA	FALSE	NA	Endoplasmic reticulum;Cytoplasm	Endoplasmic reticulum;Cytoplasm	Endoplasmic reticulum;Cytoplasm	TRUE
itpa	atp2a1	atp2a1_itpa	0.552135	2.6143e-14	5.59377e-12	NA	NA	FALSE	NA	FALSE	NA	Cytosol	Endoplasmic reticulum;Cytoplasm		FALSE
chchd3	atp2a1	atp2a1_chchd3	0.497633	1.61671e-11	1.73007e-09	NA	NA	FALSE	NA	FALSE	NA	Mitochondria;Cytoplasm	Endoplasmic reticulum;Cytoplasm	Cytoplasm	TRUE
pura	atp2a1	atp2a1_pura	0.483872	6.893e-11	6.23831e-09	NA	NA	FALSE	NA	FALSE	NA	NA	Endoplasmic reticulum;Cytoplasm		FALSE
lrpap1	atp2a1	atp2a1_lrpap1	0.373916	9.52074e-07	2.45168e-05	NA	NA	FALSE	NA	FALSE	NA	Endoplasmic reticulum;Cytoplasm	Endoplasmic reticulum;Cytoplasm	Endoplasmic reticulum;Cytoplasm	TRUE
atp1b2	atp2a1	atp1b2_atp2a1	0.383363	4.76937e-07	1.36265e-05	NA	NA	FALSE	NA	FALSE	363	NA	Endoplasmic reticulum;Cytoplasm		FALSE
bcap31	atp2a1	atp2a1_bcap31	0.336358	1.20777e-05	0.000207264	NA	NA	FALSE	NA	FALSE	202	Endoplasmic reticulum;Cytoplasm	Endoplasmic reticulum;Cytoplasm	Endoplasmic reticulum;Cytoplasm	TRUE
mlec	atp2a1	atp2a1_mlec	0.626871	4.51782e-19	2.72988e-16	NA	NA	FALSE	NA	FALSE	NA	NA	Endoplasmic reticulum;Cytoplasm		FALSE
hdhd2	atp2a1	atp2a1_hdhd2	0.454112	1.28344e-09	8.16232e-08	NA	NA	FALSE	NA	FALSE	NA	Vesicles	Endoplasmic reticulum;Cytoplasm		FALSE
ubac1	atp2a1	atp2a1_ubac1	0.365522	1.72813e-06	4.0627e-05	NA	NA	FALSE	NA	FALSE	NA	Cytosol;Plasma membrane	Endoplasmic reticulum;Cytoplasm		FALSE
hhatl	atp2a1	atp2a1_hhatl	0.47026	2.71909e-10	2.09231e-08	NA	NA	FALSE	NA	FALSE	NA	NA	Endoplasmic reticulum;Cytoplasm		FALSE
ykt6	atp2a1	atp2a1_ykt6	0.59361	8.45088e-17	3.16631e-14	NA	NA	FALSE	NA	FALSE	NA	Cytosol	Endoplasmic reticulum;Cytoplasm		FALSE
otub1	atp2a1	atp2a1_otub1	0.610045	6.88072e-18	3.25247e-15	NA	NA	FALSE	NA	FALSE	NA	Nucleus;Cytosol	Endoplasmic reticulum;Cytoplasm		FALSE
skp1a	atp2a1	atp2a1_skp1a	0.557009	1.38826e-14	3.16603e-12	NA	NA	FALSE	NA	FALSE	NA	NA	Endoplasmic reticulum;Cytoplasm		FALSE
cisd1	atp2a1	atp2a1_cisd1	0.487777	4.59768e-11	4.36469e-09	NA	NA	FALSE	NA	FALSE	165	Mitochondria;Cytoplasm	Endoplasmic reticulum;Cytoplasm	Cytoplasm	TRUE
prkag1	atp2a1	atp2a1_prkag1	0.467335	3.62344e-10	2.69274e-08	NA	NA	FALSE	NA	FALSE	NA	Nucleoplasm;Nucleus;Cytosol	Endoplasmic reticulum;Cytoplasm		FALSE
sod1	atp2a1	atp2a1_sod1	0.311651	5.41467e-05	0.000714132	NA	NA	FALSE	NA	FALSE	422	Nucleus;Cytosol;Plasma membrane	Endoplasmic reticulum;Cytoplasm		FALSE
nae1	atp2a1	atp2a1_nae1	0.457718	9.13892e-10	6.06341e-08	NA	NA	FALSE	NA	FALSE	NA	Nucleus	Endoplasmic reticulum;Cytoplasm		FALSE
impad1	atp2a1	atp2a1_impad1	0.388232	3.31156e-07	9.97692e-06	NA	NA	FALSE	NA	FALSE	NA	Golgi apparatus;Cytoplasm	Endoplasmic reticulum;Cytoplasm	Cytoplasm	TRUE
preb	atp2a1	atp2a1_preb	0.591817	1.10157e-16	4.02535e-14	NA	NA	FALSE	NA	FALSE	NA	Endoplasmic reticulum;Cytoplasm	Endoplasmic reticulum;Cytoplasm	Endoplasmic reticulum;Cytoplasm	TRUE
crot	atp2a1	atp2a1_crot	0.565814	4.30787e-15	1.10502e-12	NA	NA	FALSE	NA	FALSE	NA	Vesicles	Endoplasmic reticulum;Cytoplasm		FALSE
sun1	atp2a1	atp2a1_sun1	0.653428	4.31295e-21	3.87368e-18	NA	NA	FALSE	NA	FALSE	NA	Nuclear membrane;Nucleus	Endoplasmic reticulum;Cytoplasm		FALSE
sypl2	atp2a1	atp2a1_sypl2	0.640998	4.0266e-20	2.99399e-17	NA	NA	FALSE	NA	FALSE	491	Nucleoplasm;Nucleus	Endoplasmic reticulum;Cytoplasm		FALSE
mapk9	atp2a1	atp2a1_mapk9	0.341717	8.57161e-06	0.000155785	NA	NA	FALSE	NA	FALSE	NA	NA	Endoplasmic reticulum;Cytoplasm		FALSE
psma4	atp2a1	atp2a1_psma4	0.502582	9.4439e-12	1.07557e-09	NA	NA	FALSE	NA	FALSE	NA	Nucleus;Cytosol	Endoplasmic reticulum;Cytoplasm		FALSE
arih1	atp2a1	arih1_atp2a1	0.458803	8.24521e-10	5.54179e-08	NA	NA	FALSE	NA	FALSE	NA	Golgi apparatus;Cytoplasm	Endoplasmic reticulum;Cytoplasm	Cytoplasm	TRUE
ube2l3	atp2a1	atp2a1_ube2l3	0.650832	6.93673e-21	5.99187e-18	NA	NA	FALSE	NA	FALSE	NA	Nucleus;Cytosol	Endoplasmic reticulum;Cytoplasm		FALSE
ndufs8	atp2a1	atp2a1_ndufs8	0.308962	6.326e-05	0.000810896	NA	NA	FALSE	NA	FALSE	NA	Mitochondria;Cytoplasm	Endoplasmic reticulum;Cytoplasm	Cytoplasm	TRUE
akt2	atp2a1	akt2_atp2a1	0.374128	9.37674e-07	2.42014e-05	NA	NA	FALSE	NA	FALSE	NA	Nucleus;Vesicles;Cytosol	Endoplasmic reticulum;Cytoplasm		FALSE
vapa	atp2a1	atp2a1_vapa	0.647382	1.29515e-20	1.062e-17	NA	NA	FALSE	NA	FALSE	NA	Endoplasmic reticulum;Cytoplasm	Endoplasmic reticulum;Cytoplasm	Endoplasmic reticulum;Cytoplasm	TRUE
setd7	atp2a1	atp2a1_setd7	0.395476	1.90332e-07	6.21637e-06	NA	NA	FALSE	NA	FALSE	NA	Nucleoli;Nucleus	Endoplasmic reticulum;Cytoplasm		FALSE
prkar1a	atp2a1	atp2a1_prkar1a	0.352365	4.25522e-06	8.67257e-05	NA	NA	FALSE	NA	FALSE	NA	Cytosol	Endoplasmic reticulum;Cytoplasm		FALSE
ppp2r5a	atp2a1	atp2a1_ppp2r5a	0.384595	4.35123e-07	1.2601e-05	NA	NA	FALSE	NA	FALSE	NA	Cytosol	Endoplasmic reticulum;Cytoplasm		FALSE
rab5b	atp2a1	atp2a1_rab5b	0.342852	7.96487e-06	0.000146512	NA	NA	FALSE	NA	FALSE	NA	Vesicles	Endoplasmic reticulum;Cytoplasm		FALSE
apip	atp2a1	apip_atp2a1	0.505851	6.59039e-12	7.81674e-10	NA	NA	FALSE	NA	FALSE	NA	Nucleoplasm;Nucleus	Endoplasmic reticulum;Cytoplasm		FALSE
cdc42	atp2a1	atp2a1_cdc42	0.485436	5.86465e-11	5.41227e-09	NA	NA	FALSE	NA	FALSE	277	Microtubules	Endoplasmic reticulum;Cytoplasm		FALSE
sgcd	atp2a1	atp2a1_sgcd	0.629668	2.82696e-19	1.77799e-16	NA	NA	FALSE	NA	FALSE	239	NA	Endoplasmic reticulum;Cytoplasm		FALSE
nek7	atp2a1	atp2a1_nek7	0.412377	4.96172e-08	1.95651e-06	NA	NA	FALSE	NA	FALSE	NA	Nucleoplasm;Nucleus	Endoplasmic reticulum;Cytoplasm		FALSE
tmx3	atp2a1	atp2a1_tmx3	0.328431	1.98256e-05	0.000312542	NA	NA	FALSE	NA	FALSE	NA	NA	Endoplasmic reticulum;Cytoplasm		FALSE
prmt1	atp2a1	atp2a1_prmt1	0.433406	8.36914e-09	4.19232e-07	NA	NA	FALSE	NA	FALSE	NA	Nucleoplasm;Nucleus	Endoplasmic reticulum;Cytoplasm		FALSE
rac1	atp2a1	atp2a1_rac1	0.415217	3.92909e-08	1.60035e-06	NA	NA	FALSE	NA	FALSE	NA	Nucleus;Cytosol	Endoplasmic reticulum;Cytoplasm		FALSE
psmb7	atp2a1	atp2a1_psmb7	0.35259	4.19172e-06	8.56402e-05	NA	NA	FALSE	NA	FALSE	NA	Nucleoplasm;Nucleus	Endoplasmic reticulum;Cytoplasm		FALSE
crk	atp2a1	atp2a1_crk	0.350987	4.66564e-06	9.371e-05	NA	NA	FALSE	NA	FALSE	NA	Plasma membrane	Endoplasmic reticulum;Cytoplasm		FALSE
agpat3	atp2a1	agpat3_atp2a1	0.330198	1.77731e-05	0.000285562	NA	NA	FALSE	NA	FALSE	NA	NA	Endoplasmic reticulum;Cytoplasm		FALSE
nutf2	atp2a1	atp2a1_nutf2	0.683784	1.15575e-23	1.65028e-20	NA	NA	FALSE	NA	FALSE	NA	Microtubules	Endoplasmic reticulum;Cytoplasm		FALSE
fnta	atp2a1	atp2a1_fnta	0.614466	3.41746e-18	1.72422e-15	NA	NA	FALSE	NA	FALSE	NA	Cytosol	Endoplasmic reticulum;Cytoplasm		FALSE
uqcrh	atp2a1	atp2a1_uqcrh	0.324658	2.49808e-05	0.000378361	NA	NA	FALSE	NA	FALSE	NA	NA	Endoplasmic reticulum;Cytoplasm		FALSE
slc37a4	atp2a1	atp2a1_slc37a4	0.399657	1.37427e-07	4.69634e-06	NA	NA	FALSE	NA	FALSE	NA	Mitochondria;Cytoplasm	Endoplasmic reticulum;Cytoplasm	Cytoplasm	TRUE
rap1a	atp2a1	atp2a1_rap1a	0.354708	3.63516e-06	7.60029e-05	NA	NA	FALSE	NA	FALSE	NA	NA	Endoplasmic reticulum;Cytoplasm		FALSE
acp1	atp2a1	acp1_atp2a1	0.412409	4.9488e-08	1.95213e-06	NA	NA	FALSE	NA	FALSE	NA	Nucleus	Endoplasmic reticulum;Cytoplasm		FALSE
acp1	atp2a1	acp1_atp2a1	0.412409	4.9488e-08	1.95213e-06	NA	NA	FALSE	NA	FALSE	NA	Nucleus	Endoplasmic reticulum;Cytoplasm		FALSE
tmed10	atp2a1	atp2a1_tmed10	0.396042	1.8217e-07	5.98538e-06	NA	NA	FALSE	NA	FALSE	NA	Golgi apparatus;Cytoplasm	Endoplasmic reticulum;Cytoplasm	Cytoplasm	TRUE
ran	atp2a1	atp2a1_ran	0.51096	3.72683e-12	4.71041e-10	NA	NA	FALSE	NA	FALSE	NA	Nucleus	Endoplasmic reticulum;Cytoplasm		FALSE
clic5	atp2a1	atp2a1_clic5	0.479162	1.11591e-10	9.54487e-09	NA	NA	FALSE	NA	FALSE	NA	Plasma membrane	Endoplasmic reticulum;Cytoplasm		FALSE
lypla1	atp2a1	atp2a1_lypla1	0.373351	9.91603e-07	2.5381e-05	NA	NA	FALSE	NA	FALSE	NA	Cytosol	Endoplasmic reticulum;Cytoplasm		FALSE
prps1l3	atp2a1	atp2a1_prps1l3	0.352216	4.2979e-06	8.74521e-05	NA	NA	FALSE	NA	FALSE	NA	NA	Endoplasmic reticulum;Cytoplasm		FALSE
faf1	atp2a1	atp2a1_faf1	0.474355	1.81073e-10	1.46341e-08	NA	NA	FALSE	NA	FALSE	NA	Nucleus	Endoplasmic reticulum;Cytoplasm		FALSE
ube2n	atp2a1	atp2a1_ube2n	0.59238	1.01387e-16	3.73207e-14	NA	NA	FALSE	NA	FALSE	NA	Nucleus	Endoplasmic reticulum;Cytoplasm		FALSE
pfn2	atp2a1	atp2a1_pfn2	0.366346	1.63116e-06	3.8686e-05	NA	NA	FALSE	NA	FALSE	NA	NA	Endoplasmic reticulum;Cytoplasm		FALSE
arl6ip5	atp2a1	arl6ip5_atp2a1	0.391715	2.54158e-07	7.96037e-06	NA	NA	FALSE	NA	FALSE	NA	Endoplasmic reticulum;Cytoplasm	Endoplasmic reticulum;Cytoplasm	Endoplasmic reticulum;Cytoplasm	TRUE
clcn1	atp2a1	atp2a1_clcn1	0.372669	1.04134e-06	2.64526e-05	NA	NA	FALSE	NA	FALSE	590	NA	Endoplasmic reticulum;Cytoplasm		FALSE
ndufs4	atp2a1	atp2a1_ndufs4	0.333995	1.40209e-05	0.000234587	NA	NA	FALSE	NA	FALSE	NA	Mitochondria;Cytoplasm	Endoplasmic reticulum;Cytoplasm	Cytoplasm	TRUE
asph	atp2a1	asph_atp2a1	0.62688	4.51126e-19	2.72644e-16	NA	NA	FALSE	NA	FALSE	368	Endoplasmic reticulum;Cytoplasm	Endoplasmic reticulum;Cytoplasm	Endoplasmic reticulum;Cytoplasm	TRUE
asph	atp2a1	asph_atp2a1	0.62688	4.51126e-19	2.72644e-16	NA	NA	FALSE	NA	FALSE	368	Endoplasmic reticulum;Cytoplasm	Endoplasmic reticulum;Cytoplasm	Endoplasmic reticulum;Cytoplasm	TRUE
asph	atp2a1	asph_atp2a1	0.62688	4.51126e-19	2.72644e-16	NA	NA	FALSE	NA	FALSE	368	Endoplasmic reticulum;Cytoplasm	Endoplasmic reticulum;Cytoplasm	Endoplasmic reticulum;Cytoplasm	TRUE
tecr	atp2a1	atp2a1_tecr	0.6727	1.08967e-22	1.31091e-19	NA	NA	FALSE	NA	FALSE	NA	Endoplasmic reticulum;Cytoplasm	Endoplasmic reticulum;Cytoplasm	Endoplasmic reticulum;Cytoplasm	TRUE
zmpste24	atp2a1	atp2a1_zmpste24	0.54934	3.74141e-14	7.71219e-12	NA	NA	FALSE	NA	FALSE	173	Cytosol	Endoplasmic reticulum;Cytoplasm		FALSE
parvb	atp2a1	atp2a1_parvb	0.560947	8.26114e-15	1.98374e-12	NA	NA	FALSE	NA	FALSE	NA	Cytosol	Endoplasmic reticulum;Cytoplasm		FALSE
atp5k	atp2a1	atp2a1_atp5k	0.344109	7.34024e-06	0.000136867	NA	NA	FALSE	NA	FALSE	NA	NA	Endoplasmic reticulum;Cytoplasm		FALSE
ano10	atp2a1	ano10_atp2a1	0.527474	5.52393e-13	8.59537e-11	NA	NA	FALSE	NA	FALSE	NA	NA	Endoplasmic reticulum;Cytoplasm		FALSE
mospd1	atp2a1	atp2a1_mospd1	0.397889	1.57807e-07	5.29164e-06	NA	NA	FALSE	NA	FALSE	NA	Nucleoplasm;Nucleus;Vesicles	Endoplasmic reticulum;Cytoplasm		FALSE
gsk3b	atp2a1	atp2a1_gsk3b	0.369495	1.30604e-06	3.20424e-05	NA	NA	FALSE	NA	FALSE	174	Nucleus	Endoplasmic reticulum;Cytoplasm		FALSE
psmb3	atp2a1	atp2a1_psmb3	0.531006	3.62291e-13	5.89571e-11	NA	NA	FALSE	NA	FALSE	NA	NA	Endoplasmic reticulum;Cytoplasm		FALSE
psmb6	atp2a1	atp2a1_psmb6	0.425258	1.6922e-08	7.72393e-07	NA	NA	FALSE	NA	FALSE	NA	Nucleoplasm;Nucleus	Endoplasmic reticulum;Cytoplasm		FALSE
fkbp5	atp2a1	atp2a1_fkbp5	0.321485	3.02696e-05	0.000443337	NA	NA	FALSE	NA	FALSE	NA	Nucleoplasm;Nucleus	Endoplasmic reticulum;Cytoplasm		FALSE
mpc1	atp2a1	atp2a1_mpc1	0.301564	9.62929e-05	0.00114222	NA	NA	FALSE	NA	FALSE	NA	Mitochondria;Cytoplasm	Endoplasmic reticulum;Cytoplasm	Cytoplasm	TRUE
epdr1	atp2a1	atp2a1_epdr1	0.301591	9.61482e-05	0.00114082	NA	NA	FALSE	NA	FALSE	NA	NA	Endoplasmic reticulum;Cytoplasm		FALSE
pdcd5	atp2a1	atp2a1_pdcd5	0.575109	1.20566e-15	3.49838e-13	NA	NA	FALSE	NA	FALSE	NA	Cytosol	Endoplasmic reticulum;Cytoplasm		FALSE
ube2m	atp2a1	atp2a1_ube2m	0.544609	6.811e-14	1.32208e-11	NA	NA	FALSE	NA	FALSE	NA	Nucleus	Endoplasmic reticulum;Cytoplasm		FALSE
inmt	atp2a1	atp2a1_inmt	0.302844	8.96159e-05	0.00107738	NA	NA	FALSE	NA	FALSE	NA	Golgi apparatus;Cytoplasm;Vesicles	Endoplasmic reticulum;Cytoplasm	Cytoplasm	TRUE
rras2	atp2a1	atp2a1_rras2	0.31295	5.0203e-05	0.000671443	NA	NA	FALSE	NA	FALSE	NA	Nucleus;Cytosol	Endoplasmic reticulum;Cytoplasm		FALSE
pon2	atp2a1	atp2a1_pon2	0.323615	2.66143e-05	0.000398729	NA	NA	FALSE	NA	FALSE	NA	NA	Endoplasmic reticulum;Cytoplasm		FALSE
fn3k	atp2a1	atp2a1_fn3k	0.389542	2.99896e-07	9.16657e-06	NA	NA	FALSE	NA	FALSE	NA	Mitochondria;Cytoplasm	Endoplasmic reticulum;Cytoplasm	Cytoplasm	TRUE
prmt5	atp2a1	atp2a1_prmt5	0.374158	9.35633e-07	2.4157e-05	NA	NA	FALSE	NA	FALSE	NA	Nucleus;Cytosol	Endoplasmic reticulum;Cytoplasm		FALSE
fam162a	atp2a1	atp2a1_fam162a	0.312642	5.11123e-05	0.000681332	NA	NA	FALSE	NA	FALSE	NA	Cytosol;Mitochondria;Cytoplasm	Endoplasmic reticulum;Cytoplasm	Cytoplasm	TRUE
lancl2	atp2a1	atp2a1_lancl2	0.326178	2.27684e-05	0.000350464	NA	NA	FALSE	NA	FALSE	NA	Nucleus;Cytosol	Endoplasmic reticulum;Cytoplasm		FALSE
cuta	atp2a1	atp2a1_cuta	0.422277	2.1793e-08	9.61187e-07	NA	NA	FALSE	NA	FALSE	NA	Focal Adhesions;Plasma membrane	Endoplasmic reticulum;Cytoplasm		FALSE
isoc2a	atp2a1	atp2a1_isoc2a	0.306567	7.25657e-05	0.00090696	NA	NA	FALSE	NA	FALSE	NA	NA	Endoplasmic reticulum;Cytoplasm		FALSE
micos13	atp2a1	atp2a1_micos13	0.427602	1.38461e-08	6.49387e-07	NA	NA	FALSE	NA	FALSE	NA	NA	Endoplasmic reticulum;Cytoplasm		FALSE
col4a1	atp2a1	atp2a1_col4a1	0.39089	2.70667e-07	8.39966e-06	NA	NA	FALSE	NA	FALSE	NA	Nucleoplasm;Nucleus	Endoplasmic reticulum;Cytoplasm		FALSE
camk1	atp2a1	atp2a1_camk1	0.362511	2.13143e-06	4.84797e-05	NA	NA	FALSE	NA	FALSE	371	Cytosol	Endoplasmic reticulum;Cytoplasm		FALSE
dnase1l1	atp2a1	atp2a1_dnase1l1	0.343877	7.45183e-06	0.00013859	NA	NA	FALSE	NA	FALSE	NA	NA	Endoplasmic reticulum;Cytoplasm		FALSE
nudt16	atp2a1	atp2a1_nudt16	0.426266	1.55257e-08	7.16881e-07	NA	NA	FALSE	NA	FALSE	NA	Nucleus;Nucleoli	Endoplasmic reticulum;Cytoplasm		FALSE
acyp2	atp2a1	acyp2_atp2a1	0.355179	3.52116e-06	7.39917e-05	NA	NA	FALSE	NA	FALSE	NA	Nucleoplasm;Nucleus	Endoplasmic reticulum;Cytoplasm		FALSE
nd5	atp2a1	atp2a1_nd5	0.355776	3.38181e-06	7.15212e-05	NA	NA	FALSE	NA	FALSE	NA	NA	Endoplasmic reticulum;Cytoplasm		FALSE
nd5	atp2a1	atp2a1_nd5	0.355776	3.38181e-06	7.15212e-05	NA	NA	FALSE	NA	FALSE	NA	NA	Endoplasmic reticulum;Cytoplasm		FALSE
eepd1	atp2a1	atp2a1_eepd1	0.314535	4.57539e-05	0.000622298	NA	NA	FALSE	NA	FALSE	NA	Nuclear speckles;Nucleoplasm;Nucleus	Endoplasmic reticulum;Cytoplasm		FALSE
mapre3	atp2a1	atp2a1_mapre3	0.379952	6.13691e-07	1.68816e-05	NA	NA	FALSE	NA	FALSE	NA	Cytosol	Endoplasmic reticulum;Cytoplasm		FALSE
slc16a1	atp2a1	atp2a1_slc16a1	0.362065	2.19842e-06	4.97636e-05	NA	NA	FALSE	NA	FALSE	NA	Cell Junctions;Plasma membrane	Endoplasmic reticulum;Cytoplasm		FALSE
pfdn5	atp2a1	atp2a1_pfdn5	0.35681	3.15251e-06	6.74236e-05	NA	NA	FALSE	NA	FALSE	NA	NA	Endoplasmic reticulum;Cytoplasm		FALSE
lrrc20	atp2a1	atp2a1_lrrc20	0.334127	1.39046e-05	0.000232947	NA	NA	FALSE	NA	FALSE	NA	Nucleoplasm;Nucleus	Endoplasmic reticulum;Cytoplasm		FALSE
mrpl1	atp2a1	atp2a1_mrpl1	0.308175	6.61863e-05	0.000841321	NA	NA	FALSE	NA	FALSE	NA	Mitochondria;Cytoplasm	Endoplasmic reticulum;Cytoplasm	Cytoplasm	TRUE
ddt	atp2a1	atp2a1_ddt	0.357895	2.92803e-06	6.33546e-05	NA	NA	FALSE	NA	FALSE	NA	Mitochondria;Cytoplasm	Endoplasmic reticulum;Cytoplasm	Cytoplasm	TRUE
kpna1	atp2a1	atp2a1_kpna1	0.382935	4.92339e-07	1.39963e-05	NA	NA	FALSE	NA	FALSE	NA	Nucleus	Endoplasmic reticulum;Cytoplasm		FALSE
ndufa11	atp2a1	atp2a1_ndufa11	0.439577	4.84933e-09	2.60701e-07	NA	NA	FALSE	NA	FALSE	NA	Mitochondria;Cytoplasm	Endoplasmic reticulum;Cytoplasm	Cytoplasm	TRUE
tor1b	atp2a1	atp2a1_tor1b	0.524203	8.1294e-13	1.21245e-10	NA	NA	FALSE	NA	FALSE	NA	Nuclear speckles;Nucleoplasm;Nucleus	Endoplasmic reticulum;Cytoplasm		FALSE
elob	atp2a1	atp2a1_elob	0.675173	6.66164e-23	8.34995e-20	NA	NA	FALSE	NA	FALSE	NA	NA	Endoplasmic reticulum;Cytoplasm		FALSE
ccdc134	atp2a1	atp2a1_ccdc134	0.467945	3.41382e-10	2.55471e-08	NA	NA	FALSE	NA	FALSE	NA	NA	Endoplasmic reticulum;Cytoplasm		FALSE
slc16a3	atp2a1	atp2a1_slc16a3	0.439505	4.88039e-09	2.6216e-07	NA	NA	FALSE	NA	FALSE	NA	Plasma membrane	Endoplasmic reticulum;Cytoplasm		FALSE
ensa	atp2a1	atp2a1_ensa	0.478831	1.15396e-10	9.83228e-09	NA	NA	FALSE	NA	FALSE	NA	Nucleus;Nucleoli	Endoplasmic reticulum;Cytoplasm		FALSE
fundc2	atp2a1	atp2a1_fundc2	0.544775	6.67005e-14	1.29743e-11	NA	NA	FALSE	NA	FALSE	NA	NA	Endoplasmic reticulum;Cytoplasm		FALSE
lzic	atp2a1	atp2a1_lzic	0.309927	5.98366e-05	0.000774907	NA	NA	FALSE	NA	FALSE	NA	Nucleoplasm;Nucleus	Endoplasmic reticulum;Cytoplasm		FALSE
eif4e	atp2a1	atp2a1_eif4e	0.430992	1.03303e-08	5.03655e-07	NA	NA	FALSE	NA	FALSE	NA	Cytosol;Cytoplasmic bodies;Cytoplasm	Endoplasmic reticulum;Cytoplasm	Cytoplasm	TRUE
ndufb5	atp2a1	atp2a1_ndufb5	0.445716	2.78721e-09	1.60747e-07	NA	NA	FALSE	NA	FALSE	NA	Mitochondria;Cytoplasm	Endoplasmic reticulum;Cytoplasm	Cytoplasm	TRUE
tmed4	atp2a1	atp2a1_tmed4	0.422237	2.18669e-08	9.63973e-07	NA	NA	FALSE	NA	FALSE	NA	NA	Endoplasmic reticulum;Cytoplasm		FALSE
cdnf	atp2a1	atp2a1_cdnf	0.483842	6.91416e-11	6.25509e-09	NA	NA	FALSE	NA	FALSE	NA	NA	Endoplasmic reticulum;Cytoplasm		FALSE
nd1	atp2a1	atp2a1_nd1	0.303923	8.43244e-05	0.00102511	NA	NA	FALSE	NA	FALSE	NA	NA	Endoplasmic reticulum;Cytoplasm		FALSE
nd1	atp2a1	atp2a1_nd1	0.303923	8.43244e-05	0.00102511	NA	NA	FALSE	NA	FALSE	NA	NA	Endoplasmic reticulum;Cytoplasm		FALSE
h1f0	atp2a1	atp2a1_h1f0	0.549863	3.49954e-14	7.26195e-12	NA	NA	FALSE	NA	FALSE	NA	Nucleus;Nuclear bodies;Nucleoplasm	Endoplasmic reticulum;Cytoplasm		FALSE
retreg1	atp2a1	atp2a1_retreg1	0.380539	5.87753e-07	1.62742e-05	NA	NA	FALSE	NA	FALSE	NA	NA	Endoplasmic reticulum;Cytoplasm		FALSE
[truncated: 427,125+ more rows]
