# Supplementary material for: Proteome-wide systems genetics identifies UFMylation as a regulator of skeletal muscle function
Source: eLife. 2022 Dec 6;11:e82951. doi: 10.7554/eLife.82951 (PMC9833826; doi:10.7554/eLife.82951)
Supplement: Supplementary file 4. — Summary of traits integrated into the current study including Pubmed ID sources. Related to Figures 2 and 3. [file elife-82951-supp4.xlsx]

## Sheet: Table_S4
trait_name	units	trait_description	study	R (heritability)
AB1_2_IgM_pmid20054062	-	IgM antibody levels	pmid20054062	0.638248
adiposity coefficient of variation_pmid26694027	-	-	pmid26694027	0
adiposity_pmid26694027	fraction	-	pmid26694027	0.710868
adrenal mass/body weight_pmid25480693	-	adrenal mass/body weight	pmid25480693	NA
adrenal mass_pmid25480693	g	adrenal mass	pmid25480693	NA
Aortic valve ejection time (day 0)_pmid25480693	ms	Aortic valve ejection time	pmid25480693	NA
Aortic valve ejection time (day 14)_pmid25480693	ms	Aortic valve ejection time	pmid25480693	NA
Aortic valve ejection time (day 21)_pmid25480693	ms	Aortic valve ejection time	pmid25480693	NA
Aortic valve ejection time (day 7)_pmid25480693	ms	Aortic valve ejection time	pmid25480693	NA
ApoA2_pmid20054062	-	-	pmid20054062	0.519052
ApoB_pmid20054062	-	-	pmid20054062	0.349257
ApoC3_pmid20054062	-	-	pmid20054062	0.501935
ApoE_pmid20054062	-	-	pmid20054062	0.383421
Asp_Time_pmid20054062	-	-	pmid20054062	NA
average adiposity (liver)_pmid26694027	fraction	average fat mass/average total mass	pmid26694027	0.367599
average fat mass (liver)_pmid26694027	g	-	pmid26694027	0.385283
average lean mass (liver)_pmid26694027	g	-	pmid26694027	0.482483
average total mass (liver)_pmid26694027	g	average fat mass + average lean mass	pmid26694027	0.453619
beta-hydroxybutyrate_pmid20054062	-	-	pmid20054062	0.619028
BF_Percent_Growth_0to2wks_pmid25651185	%	(final % - initial %) / initial %	pmid25651185	0.608646
BF_Percent_Growth_0to4wks_pmid25651185	%	(final % - initial %) / initial %	pmid25651185	0.554028
BF_Percent_Growth_0to6wks_pmid25651185	%	(final % - initial %) / initial %	pmid25651185	0.569056
BF_Percent_Growth_0to8wks_pmid25651185	%	(final % - initial %) / initial %	pmid25651185	0.569254
BF_Percent_Growth_2to4wks_pmid25651185	%	(final % - initial %) / initial %	pmid25651185	0.295571
BF_Percent_Growth_2to6wks_pmid25651185	%	(final % - initial %) / initial %	pmid25651185	0.243619
BF_Percent_Growth_2to8wks_pmid25651185	%	(final % - initial %) / initial %	pmid25651185	0.297699
BF_Percent_Growth_4to6wks_pmid25651185	%	(final % - initial %) / initial %	pmid25651185	0.192271
BF_Percent_Growth_4to8wks_pmid25651185	%	(final % - initial %) / initial %	pmid25651185	0.184426
BF_Percent_Growth_6to8wks_pmid25651185	%	(final % - initial %) / initial %	pmid25651185	0.0678012
BF_response_0to2wks_pmid25651185	%	final % - initial %	pmid25651185	0.612249
BF_response_0to4wks_pmid25651185	%	final % - initial %	pmid25651185	0.611709
BF_response_0to6wks_pmid25651185	%	final % - initial %	pmid25651185	0.628856
BF_response_0to8wks_pmid25651185	%	final % - initial %	pmid25651185	0.640005
BF_response_2to4wks_pmid25651185	%	final % - initial %	pmid25651185	0.324928
BF_response_2to6wks_pmid25651185	%	final % - initial %	pmid25651185	0.367817
BF_response_2to8wks_pmid25651185	%	final % - initial %	pmid25651185	0.410701
BF_response_4to6wks_pmid25651185	%	final % - initial %	pmid25651185	0.240391
BF_response_4to8wks_pmid25651185	%	final % - initial %	pmid25651185	0.262208
BF_response_6to8wks_pmid25651185	%	final % - initial %	pmid25651185	0.0263295
BMD_C1-C6_pmid20054062	-	-	pmid20054062	0.629698
BMD_femur_pmid20054062	-	-	pmid20054062	0.613482
BMD_total_pmid20054062	-	-	pmid20054062	0.67552
body weight (day 0)_pmid25480693	g	-	pmid25480693	NA
body weight (day 14)_pmid25480693	g	-	pmid25480693	NA
body weight (day 21)_pmid25480693	g	-	pmid25480693	NA
body weight (day 7)_pmid25480693	g	-	pmid25480693	NA
Body Weight_pmid26694027	g	-	pmid26694027	0.737655
BW_pmid20054062	g	-	pmid20054062	0.769917
BW_reue	-	-	reue	0.950572
bw_reue	-	-	reue	NA
CE(16:0)_pmid25651185	-	-	pmid25651185	0.496312
CE(16:1)_pmid25651185	-	-	pmid25651185	0.247479
CE(18:0)_pmid25651185	-	-	pmid25651185	0.533638
CE(18:1)_pmid25651185	-	-	pmid25651185	0.472392
CE(18:2)_pmid25651185	-	-	pmid25651185	0.159149
CE(18:3)_pmid25651185	-	-	pmid25651185	0.326831
CE(20:4)_pmid25651185	-	-	pmid25651185	0.11358
CE(C16:0)_pmid26694027	-	-	pmid26694027	0.651681
CE(C16:1)_pmid26694027	-	-	pmid26694027	0.58766
CE(C18:0)_pmid26694027	-	-	pmid26694027	0.519701
CE(C18:1)_pmid26694027	-	-	pmid26694027	0.540929
CE(C18:2)_pmid26694027	-	-	pmid26694027	0.50419
CE(C20:4)_pmid26694027	-	-	pmid26694027	0.574779
CE(C20:5)_pmid26694027	-	-	pmid26694027	0.69664
Cecum Weight_fast	-	-	fast	0.50791
Cer(34:1)_pmid25651185	-	-	pmid25651185	0.426899
Cer(34:2)_pmid25651185	-	-	pmid25651185	0.428397
Cer(36:1)_pmid25651185	-	-	pmid25651185	0.284229
Cer(36:2)_pmid25651185	-	-	pmid25651185	0.328995
Cer(38:1)_pmid25651185	-	-	pmid25651185	0.260943
Cer(38:2)_pmid25651185	-	-	pmid25651185	0.0960259
Cer(38:4)_pmid25651185	-	-	pmid25651185	0.677909
Cer(38:5)_pmid25651185	-	-	pmid25651185	0.605082
Cer(38:6)_pmid25651185	-	-	pmid25651185	0.574651
Cer(38:7)_pmid25651185	-	-	pmid25651185	0.314299
Cer(C34:0)_pmid26694027	-	-	pmid26694027	0.364735
Cer(C34:1)_pmid26694027	-	-	pmid26694027	0.55913
Cer(C34:2)_pmid26694027	-	-	pmid26694027	0.540848
Cer(C36:0)_pmid26694027	-	-	pmid26694027	0.42314
Cer(C36:1)_pmid26694027	-	-	pmid26694027	0.404776
Cer(C38:0)_pmid26694027	-	-	pmid26694027	0.326241
Cer(C38:1)_pmid26694027	-	-	pmid26694027	0.731435
Cer(C40:0)_pmid26694027	-	-	pmid26694027	0.487968
Cer(C40:1)a_pmid26694027	-	-	pmid26694027	0
Cer(C40:1)b_pmid26694027	-	-	pmid26694027	0.569843
Cer(C40:2)a_pmid26694027	-	-	pmid26694027	0.393371
Cer(C40:2)b_pmid26694027	-	-	pmid26694027	0.0342736
Cer(C42:0)_pmid26694027	-	-	pmid26694027	0.496109
Cer(C42:1)a_pmid26694027	-	-	pmid26694027	0.141544
Cer(C42:1)b_pmid26694027	-	-	pmid26694027	0.348938
Cer(C42:2)a_pmid26694027	-	-	pmid26694027	0.693996
Cer(C42:2)b_pmid26694027	-	-	pmid26694027	0.693707
Cer(C42:3)a_pmid26694027	-	-	pmid26694027	0.775878
Cer(C42:3)b_pmid26694027	-	-	pmid26694027	0.48121
Cer(C42:4)_pmid26694027	-	-	pmid26694027	0.362093
Cer(C42:5)_pmid26694027	-	-	pmid26694027	0.580058
Cer(C42:7)_pmid26694027	-	-	pmid26694027	0.413959
Cer-PC(34:1)_pmid25651185	-	-	pmid25651185	0.515956
Cer-PC(36:1)_pmid25651185	-	-	pmid25651185	0.36923
Cer-PC(36:2)_pmid25651185	-	-	pmid25651185	0.484829
Cer-PC(36:3)_pmid25651185	-	-	pmid25651185	0.534927
Cer-PC(38:1)_pmid25651185	-	-	pmid25651185	0.634467
Cer-PC(38:2)_pmid25651185	-	-	pmid25651185	0.961429
Cer-PC(40:1)_pmid25651185	-	-	pmid25651185	0.543048
Cer-PC(40:3)_pmid25651185	-	-	pmid25651185	0.655256
Cer-PC(40:4)_pmid25651185	-	-	pmid25651185	0.606043
Cer-PC(40:6)_pmid25651185	-	-	pmid25651185	0.811594
Cer-PC(42:1)_pmid25651185	-	-	pmid25651185	0.555128
Cer-PC(42:2)_pmid25651185	-	-	pmid25651185	0.740404
Cer-PC(42:4)_pmid25651185	-	-	pmid25651185	0.468895
Cer-PC(44:1)_pmid25651185	-	-	pmid25651185	0.456538
Cer-PC(44:2)_pmid25651185	-	-	pmid25651185	0.561833
Cer-PE(34:1)_pmid25651185	-	-	pmid25651185	0.307679
Cer-PE(36:1)_pmid25651185	-	-	pmid25651185	0.226075
Cer-PE(36:2)_pmid25651185	-	-	pmid25651185	0.293858
Cer-PE(36:3)_pmid25651185	-	-	pmid25651185	0.421314
Cer-PE(38:2)_pmid25651185	-	-	pmid25651185	0.588335
Cer-PE(40:1)_pmid25651185	-	-	pmid25651185	0.382997
Cer-PE(40:2)_pmid25651185	-	-	pmid25651185	0.788484
Cer-PE(40:3)_pmid25651185	-	-	pmid25651185	0.74126
Cer-PE(40:4)_pmid25651185	-	-	pmid25651185	0.31916
Cer-PE(40:5)_pmid25651185	-	-	pmid25651185	0.703876
Cer-PE(42:1)_pmid25651185	-	-	pmid25651185	0.554798
Cer-PE(42:2)_pmid25651185	-	-	pmid25651185	0.404561
Cer-PE(42:4)_pmid25651185	-	-	pmid25651185	0
Cer-PE(42:5)_pmid25651185	-	-	pmid25651185	0.325471
Cer-PE(44:1)_pmid25651185	-	-	pmid25651185	0.648574
Cer-PE(44:2)_pmid25651185	-	-	pmid25651185	0.439465
cholesterol_reue	-	-	reue	NA
Cholesteryl ester (liver)_pmid25651185	mg/g	-	pmid25651185	0.457898
Citrate synthase activity_pmid25651185	nmol/min/g	-	pmid25651185	NA
ck_reue	-	-	reue	NA
CL(70:4)_pmid25651185	-	-	pmid25651185	0.592814
CL(70:5)_pmid25651185	-	-	pmid25651185	0.566039
CL(70:6)_pmid25651185	-	-	pmid25651185	0.586737
CL(70:7)_pmid25651185	-	-	pmid25651185	0.598621
CL(72:4)_pmid25651185	-	-	pmid25651185	0.623904
CL(72:5)_pmid25651185	-	-	pmid25651185	0.65729
CL(72:6)_pmid25651185	-	-	pmid25651185	0.605637
CL(72:7)_pmid25651185	-	-	pmid25651185	0.487094
CL(72:8)_pmid25651185	-	-	pmid25651185	0.328691
CL(72:9)_pmid25651185	-	-	pmid25651185	0.64924
CL(74:6)_pmid25651185	-	-	pmid25651185	0.377744
CL(74:7)_pmid25651185	-	-	pmid25651185	0.39988
CL(74:8)_pmid25651185	-	-	pmid25651185	0.307956
CL(74:9)_pmid25651185	-	-	pmid25651185	0.635996
CL(C68:2)_pmid26694027	-	-	pmid26694027	0.35788
CL(C68:3)_pmid26694027	-	-	pmid26694027	0.498772
CL(C68:4)_pmid26694027	-	-	pmid26694027	0
CL(C68:5)_pmid26694027	-	-	pmid26694027	0.0810509
CL(C70:4)_pmid26694027	-	-	pmid26694027	0.419009
CL(C70:5)_pmid26694027	-	-	pmid26694027	0.296564
CL(C70:7)_pmid26694027	-	-	pmid26694027	0.577187
CL(C72:5)_pmid26694027	-	-	pmid26694027	0.568499
CL(C72:6)_pmid26694027	-	-	pmid26694027	0.484073
CL(C72:7)a_pmid26694027	-	-	pmid26694027	0.504735
CL(C72:7)b_pmid26694027	-	-	pmid26694027	0.533083
CL(C72:8)a_pmid26694027	-	-	pmid26694027	0.429718
CL(C72:8)b_pmid26694027	-	-	pmid26694027	0.339724
CL(C72:9)_pmid26694027	-	-	pmid26694027	0.402893
CL(C74:10)a_pmid26694027	-	-	pmid26694027	0.50788
CL(C74:10)b_pmid26694027	-	-	pmid26694027	0.6177
CL(C74:6)_pmid26694027	-	-	pmid26694027	0.437476
CL(C74:7)_pmid26694027	-	-	pmid26694027	0.39429
CL(C74:8)a_pmid26694027	-	-	pmid26694027	0.613516
CL(C74:8)b_pmid26694027	-	-	pmid26694027	0.595642
CL(C74:9)a_pmid26694027	-	-	pmid26694027	0.551412
CL(C74:9)b_pmid26694027	-	-	pmid26694027	0.659154
CL(C76:10)a_pmid26694027	-	-	pmid26694027	0.61743
CL(C76:10)b_pmid26694027	-	-	pmid26694027	0.563401
CL(C76:9)_pmid26694027	-	-	pmid26694027	0.605655
Clusterin_pmid20054062	-	-	pmid20054062	0.19673
Col(C22:6)_pmid26694027	-	-	pmid26694027	0.40708
Complex I activity / Citrate synthase activity_pmid25651185	fraction	-	pmid25651185	NA
Complex I activity_pmid25651185	nmol/min/g	-	pmid25651185	NA
CuOx_LDL_IgM_pmid20054062	-	copper oxide-modified LDL	pmid20054062	0.675956
DAG(C30:0)b_pmid26694027	-	-	pmid26694027	0.327274
DAG(C30:0)c_pmid26694027	-	-	pmid26694027	0.34529
DAG(C32:0)b_pmid26694027	-	-	pmid26694027	0.187821
DAG(C32:0)c_pmid26694027	-	-	pmid26694027	0.294847
DAG(C32:1)a_pmid26694027	-	-	pmid26694027	0.297528
DAG(C32:1)b_pmid26694027	-	-	pmid26694027	0.108363
DAG(C32:1)c_pmid26694027	-	-	pmid26694027	0.082168
DAG(C33:1)_pmid26694027	-	-	pmid26694027	0.259642
DAG(C34:1)a_pmid26694027	-	-	pmid26694027	0.448618
DAG(C34:1)b_pmid26694027	-	-	pmid26694027	0.929638
DAG(C34:2)a_pmid26694027	-	-	pmid26694027	0.0671321
DAG(C34:3)a_pmid26694027	-	-	pmid26694027	0.199702
DAG(C34:3)b_pmid26694027	-	-	pmid26694027	0.46093
DAG(C35:1)a_pmid26694027	-	-	pmid26694027	0.479834
DAG(C35:1)b_pmid26694027	-	-	pmid26694027	0.270336
DAG(C35:2)a_pmid26694027	-	-	pmid26694027	0.219477
DAG(C35:2)b_pmid26694027	-	-	pmid26694027	0.597856
DAG(C35:2)c_pmid26694027	-	-	pmid26694027	0.91413
DAG(C36:0)a_pmid26694027	-	-	pmid26694027	0.691526
DAG(C36:0)b_pmid26694027	-	-	pmid26694027	0.641907
DAG(C36:0)c_pmid26694027	-	-	pmid26694027	0.257725
DAG(C36:0)d_pmid26694027	-	-	pmid26694027	0.362223
DAG(C36:1)a_pmid26694027	-	-	pmid26694027	0.227258
DAG(C36:1)b_pmid26694027	-	-	pmid26694027	0.575315
DAG(C36:2)a_pmid26694027	-	-	pmid26694027	0.108493
DAG(C36:2)b_pmid26694027	-	-	pmid26694027	0.493319
DAG(C36:3)a_pmid26694027	-	-	pmid26694027	0.374492
DAG(C36:3)b_pmid26694027	-	-	pmid26694027	0
DAG(C36:4)a_pmid26694027	-	-	pmid26694027	0.544649
DAG(C36:4)b_pmid26694027	-	-	pmid26694027	0.230777
DAG(C36:5)_pmid26694027	-	-	pmid26694027	0.416152
DAG(C38:1)a_pmid26694027	-	-	pmid26694027	0.847498
DAG(C38:1)b_pmid26694027	-	-	pmid26694027	0.424038
DAG(C38:2)b_pmid26694027	-	-	pmid26694027	0.147287
DAG(C38:3)a_pmid26694027	-	-	pmid26694027	0.417284
DAG(C38:3)b_pmid26694027	-	-	pmid26694027	0.156155
DAG(C38:4)a_pmid26694027	-	-	pmid26694027	0.527351
DAG(C38:4)b_pmid26694027	-	-	pmid26694027	0.0956635
DAG(C38:5)b_pmid26694027	-	-	pmid26694027	0.429744
DAG(C38:5)c_pmid26694027	-	-	pmid26694027	0.11933
DAG(C38:6)a_pmid26694027	-	-	pmid26694027	0.821037
DAG(C38:6)b_pmid26694027	-	-	pmid26694027	0.449473
DAG(C40:3)_pmid26694027	-	-	pmid26694027	0.724647
DAG(C40:4)a_pmid26694027	-	-	pmid26694027	0.757772
DAG(C40:4)b_pmid26694027	-	-	pmid26694027	0.531995
DAG(C40:5)a_pmid26694027	-	-	pmid26694027	0.617417
DAG(C40:5)b_pmid26694027	-	-	pmid26694027	0.167744
DAG(C40:5)c_pmid26694027	-	-	pmid26694027	0.340239
DAG(C40:6)a_pmid26694027	-	-	pmid26694027	0.72892
DAG(C40:6)b_pmid26694027	-	-	pmid26694027	0.785877
DAG(C40:6)c_pmid26694027	-	-	pmid26694027	0.492778
DiCer(34:0)_pmid25651185	-	-	pmid25651185	0.544159
DiCer(36:0)_pmid25651185	-	-	pmid25651185	0.292781
DiCer(38:0)_pmid25651185	-	-	pmid25651185	0.158264
Ejection fraction (day 0)_pmid25480693	%	Ejection fraction	pmid25480693	NA
Ejection fraction (day 14)_pmid25480693	%	Ejection fraction	pmid25480693	NA
Ejection fraction (day 21)_pmid25480693	%	Ejection fraction	pmid25480693	NA
Ejection fraction (day 7)_pmid25480693	%	Ejection fraction	pmid25480693	NA
Esterified Chol_pmid25651185	mg/dl	-	pmid25651185	0.638599
FA(16:0)_pmid25651185	-	-	pmid25651185	0.24435
FA(16:1)_pmid25651185	-	-	pmid25651185	0.391505
FA(18:0)_pmid25651185	-	-	pmid25651185	0.113895
FA(18:1)_pmid25651185	-	-	pmid25651185	0.389802
FA(18:2)_pmid25651185	-	-	pmid25651185	0.12769
FA(18:3)_pmid25651185	-	-	pmid25651185	0.200584
FA(20:1)_pmid25651185	-	-	pmid25651185	0.314156
FA(20:2)_pmid25651185	-	-	pmid25651185	0.0627926
FA(20:3)_pmid25651185	-	-	pmid25651185	0.164807
FA(20:4)_pmid25651185	-	-	pmid25651185	0.253748
FA(20:5)_pmid25651185	-	-	pmid25651185	0.15382
FA(22:3)_pmid25651185	-	-	pmid25651185	0.143544
FA(22:4)_pmid25651185	-	-	pmid25651185	0.324311
FA(22:5)_pmid25651185	-	-	pmid25651185	0.357173
FA(22:6)_pmid25651185	-	-	pmid25651185	0.309994
fat mass_pmid26694027	g	-	pmid26694027	0.737234
Fat_mass_pmid20054062	g	-	pmid20054062	0.702907
FatMass_PercentGrowth_0to2wks_pmid25651185	%	-	pmid25651185	0.608763
FatMass_PercentGrowth_0to4wks_pmid25651185	%	-	pmid25651185	0.536341
FatMass_PercentGrowth_0to6wks_pmid25651185	%	-	pmid25651185	0.567756
FatMass_PercentGrowth_0to8wks_pmid25651185	%	-	pmid25651185	0.551913
FatMass_PercentGrowth_2to4wks_pmid25651185	%	-	pmid25651185	0.296571
FatMass_PercentGrowth_2to6wks_pmid25651185	%	-	pmid25651185	0.264097
FatMass_PercentGrowth_2to8wks_pmid25651185	%	-	pmid25651185	0.318347
FatMass_PercentGrowth_4to6wks_pmid25651185	%	-	pmid25651185	0.216088
FatMass_PercentGrowth_4to8wks_pmid25651185	%	-	pmid25651185	0.201076
FatMass_PercentGrowth_6to8wks_pmid25651185	%	-	pmid25651185	0.0420451
FatMass_Response_0to2wks_pmid25651185	g	-	pmid25651185	0.66197
FatMass_Response_0to4wks_pmid25651185	g	-	pmid25651185	0.672771
FatMass_Response_0to6wks_pmid25651185	g	-	pmid25651185	0.686869
FatMass_Response_0to8wks_pmid25651185	g	-	pmid25651185	0.695421
FatMass_Response_2to4wks_pmid25651185	g	-	pmid25651185	0.430325
FatMass_Response_2to6wks_pmid25651185	g	-	pmid25651185	0.492878
FatMass_Response_2to8wks_pmid25651185	g	-	pmid25651185	0.540631
FatMass_Response_4to6wks_pmid25651185	g	-	pmid25651185	0.317535
FatMass_Response_4to8wks_pmid25651185	g	-	pmid25651185	0.400463
FatMass_Response_6to8wks_pmid25651185	g	-	pmid25651185	0.158716
FFA(C14:0)_pmid26694027	-	-	pmid26694027	0
FFA(C16:0)_pmid26694027	-	-	pmid26694027	0.424864
FFA(C16:1)_pmid26694027	-	-	pmid26694027	0.799867
FFA(C18:0)_pmid26694027	-	-	pmid26694027	0.391277
FFA(C18:1)_pmid26694027	-	-	pmid26694027	0.361971
FFA(C18:2)_pmid26694027	-	-	pmid26694027	0.26613
FFA(C18:3)_pmid26694027	-	-	pmid26694027	0.182169
FFA(C20:1)_pmid26694027	-	-	pmid26694027	0.165857
FFA(C20:2)_pmid26694027	-	-	pmid26694027	0.116982
FFA(C20:3)a_pmid26694027	-	-	pmid26694027	0.65294
FFA(C20:3)b_pmid26694027	-	-	pmid26694027	0.596991
FFA(C20:4)_pmid26694027	-	-	pmid26694027	0.504402
FFA(C20:5)_pmid26694027	-	-	pmid26694027	0.513802
FFA(C22:4)_pmid26694027	-	-	pmid26694027	0.537415
FFA(C22:5)_pmid26694027	-	-	pmid26694027	0.743356
FFA(C22:6)_pmid26694027	-	-	pmid26694027	0.51238
FFA(C24:4)_pmid26694027	-	-	pmid26694027	0.390162
FFA(C24:5)_pmid26694027	-	-	pmid26694027	0.727064
FFA(C24:6)_pmid26694027	-	-	pmid26694027	0.555107
FFA_pmid25651185	mg/dl	-	pmid25651185	0.268733
FFP_percent_pmid20054062	%	femoral fat pad %	pmid20054062	0.213316
FFP_pmid20054062	g	femoral fat pad mass	pmid20054062	0.771956
fibrosed area_pmid26694027	%	-	pmid26694027	0.210867
Food Intake - Day 1_pmid25651185	g	-	pmid25651185	0.675544
Food Intake - Day 2_pmid25651185	g	-	pmid25651185	0.712951
Food Intake - Day 3_pmid25651185	g	-	pmid25651185	0.686134
Food Intake - Day 4_pmid25651185	g	-	pmid25651185	0.798196
Food Intake AVG - 4 Wks Diet_pmid25651185	g	-	pmid25651185	0.778959
Food_Intake/NMR_Mass_4wks_pmid25651185	-	-	pmid25651185	0.690451
Food_Intake/NMR_Mass_8wks_pmid25651185	-	-	pmid25651185	0.628124
Fractional shortening (day 0)_pmid25480693	%	Fractional shortening	pmid25480693	NA
Fractional shortening (day 14)_pmid25480693	%	Fractional shortening	pmid25480693	NA
Fractional shortening (day 21)_pmid25480693	%	Fractional shortening	pmid25480693	NA
Fractional shortening (day 7)_pmid25480693	%	Fractional shortening	pmid25480693	NA
free fatty acids (pre-bleed)_pmid26694027	mg/dl	-	pmid26694027	0.470102
free fatty acids_fast	-	-	fast	0.622424
free fatty acids_pmid20054062	mg/dl	-	pmid20054062	0.61217
free fatty acids_pmid25480693	mg/dl	free fatty acids	pmid25480693	NA
free fatty acids_pmid26694027	mg/dl	-	pmid26694027	0.257562
free fluid_pmid26694027	g	-	pmid26694027	0.366954
Free_fluid_pmid20054062	g	-	pmid20054062	0.518051
G-CSF_pmid26694027	pg/ml	-	pmid26694027	0
GFP_percent_pmid20054062	%	gonadal fat pad %	pmid20054062	0.703402
GFP_pmid20054062	g	gonadal fat pad mass	pmid20054062	0.709097
Glc-GP(36:2)_pmid25651185	-	-	pmid25651185	0.392291
Glc-GP(36:3)_pmid25651185	-	-	pmid25651185	0.332474
Glc-GP(36:4)_pmid25651185	-	-	pmid25651185	0.351614
Glc-GP(38:3)_pmid25651185	-	-	pmid25651185	0.82834
Glc-GP(38:4)_pmid25651185	-	-	pmid25651185	0.251187
Glc-GP(40:4)_pmid25651185	-	-	pmid25651185	0.546188
Glucose (pre-bleed)_pmid26694027	mg/dl	-	pmid26694027	0.385672
glucose_fast	-	-	fast	0.486024
Glucose_LC_pmid20054062	-	glucose (glucometer reading from fresh plasma)	pmid20054062	0.140502
Glucose_pmid20054062	-	glucose (from frozen plasma)	pmid20054062	0.550938
glucose_pmid25480693	mg/dl	glucose	pmid25480693	NA
Glucose_pmid25651185	mg/dl	-	pmid25651185	0.492996
Glucose_pmid26694027	mg/dl	-	pmid26694027	0.292415
glucose_reue	-	-	reue	NA
glucose_to_insulin_pmid20054062	-	-	pmid20054062	NA
Glycerol_pmid25651185	mg/dl	-	pmid25651185	0.399145
GM-CSF_pmid26694027	pg/ml	-	pmid26694027	0
Gonadal Fat Weight_fast	-	-	fast	0.764714
Gonadal Fat Wt_pmid25651185	g	-	pmid25651185	0.73218
Gonadal Fat_pmid26694027	g	-	pmid26694027	0.651613
Gonadal_Fat/NMR_Mass_8wks_pmid25651185	-	-	pmid25651185	0.738614
GRAN %_pmid20054062	% of white blood cells	Granulocyte cells as % of White cells	pmid20054062	0.226094
GRAN %_pmid25651185	%	Granulocyte cells as % of White cells	pmid25651185	0.392291
GRAN %_pmid26694027	% of white blood cells	Granulocyte cells as % of White cells	pmid26694027	0.352725
GRAN_pmid20054062	thousands/ul	Granulocyte cell counts	pmid20054062	0.272938
GRAN_pmid25651185	thousands/ul	Granulocyte cell counts	pmid25651185	0.139324
GRAN_pmid26694027	thousands/ul	Granulocyte cell counts	pmid26694027	0.143889
GRIP_reue	-	-	reue	0.917942
grip_reue	-	-	reue	NA
GRIPBW_reue	-	-	reue	0.836444
gripbw_reue	-	-	reue	NA
GTT0_reue	-	-	reue	0.663159
gtt0_reue	-	-	reue	NA
GTT120_reue	-	-	reue	0.626834
gtt120_reue	-	-	reue	NA
GTT15_reue	-	-	reue	0.683153
gtt15_reue	-	-	reue	NA
GTT180_reue	-	-	reue	0.562321
gtt180_reue	-	-	reue	NA
GTT60_reue	-	-	reue	0.603423
gtt60_reue	-	-	reue	NA
GTTAUC_reue	-	-	reue	0.726572
gttauc_reue	-	-	reue	NA
HCT_pmid20054062	%	Hematocrit (% of blood volume occupied by red blood cells)	pmid20054062	0.502235
HCT_pmid25651185	%	Hematocrit (% of blood volume occupied by red blood cells)	pmid25651185	0.723385
HCT_pmid26694027	%	Hematocrit (% of blood volume occupied by red blood cells)	pmid26694027	0.260695
HDL (pre-bleed)_pmid26694027	mg/dl	-	pmid26694027	0.422846
HDL_fast	-	-	fast	0.856074
HDL_pmid20054062	mg/dl	-	pmid20054062	0.765093
HDL_pmid25480693	mg/dl	HDL	pmid25480693	NA
HDL_pmid25651185	mg/dl	-	pmid25651185	0.709329
HDL_pmid26694027	mg/dl	-	pmid26694027	0.204093
Heart (g)_pmid20054062	g	-	pmid20054062	0.562795
Heart rate (day 0)_pmid25480693	bpm	Heart rate	pmid25480693	NA
Heart rate (day 14)_pmid25480693	bpm	Heart rate	pmid25480693	NA
Heart rate (day 21)_pmid25480693	bpm	Heart rate	pmid25480693	NA
Heart rate (day 7)_pmid25480693	bpm	Heart rate	pmid25480693	NA
Heart Weight_fast	-	-	fast	0.481504
Heart Wt_pmid25651185	g	-	pmid25651185	0.468366
Heart/NMR_Mass_8wks_pmid25651185	-	-	pmid25651185	0.570141
HGB_pmid20054062	g/dl	Hemoglobin protein conc in blood	pmid20054062	0.454677
HGB_pmid25651185	g/dl	Hemoglobin protein conc in blood	pmid25651185	0.466958
HGB_pmid26694027	g/dl	Hemoglobin protein conc in blood	pmid26694027	0.202525
homab_reue	-	-	reue	NA
HOMA-IR (pre-bleed)_pmid26694027	-	-	pmid26694027	0.157665
HOMA-IR_pmid25651185	-	-	pmid25651185	0.561455
HOMA-IR_pmid26694027	-	-	pmid26694027	0.340313
homair_reue	-	-	reue	NA
IDL_1 (250-296 angstroms)_pmid20054062	nmol/L	-	pmid20054062	0.733564
IDL_2 (233.3-250 angstroms)_pmid20054062	nmol/L	-	pmid20054062	0.815855
IFNr_pmid26694027	pg/ml	-	pmid26694027	1.88125e-16
IL-10_pmid26694027	pg/ml	-	pmid26694027	0.0145145
IL-12 (p40)_pmid26694027	pg/ml	-	pmid26694027	0.00191805
IL-12 (p70)_pmid26694027	pg/ml	-	pmid26694027	0.00109584
IL-13_pmid26694027	pg/ml	-	pmid26694027	0.00891887
IL-15_pmid26694027	pg/ml	-	pmid26694027	7.65689e-19
IL-1a_pmid26694027	pg/ml	-	pmid26694027	0.0234987
IL-1b_pmid26694027	pg/ml	-	pmid26694027	0.00248851
IL-2_pmid26694027	pg/ml	-	pmid26694027	0.023169
IL-4_pmid26694027	pg/ml	-	pmid26694027	0
IL-6_pmid26694027	pg/ml	-	pmid26694027	0
IL-7_pmid26694027	pg/ml	-	pmid26694027	0
Insulin (pre-bleed)_pmid26694027	pg/ml	-	pmid26694027	0.139332
Insulin pg/ml_pmid25651185	pg/ml	-	pmid25651185	0.609705
insulin_fast	-	-	fast	0.51796
Insulin_pmid20054062	-	-	pmid20054062	0.360029
Insulin_pmid26694027	pg/ml	-	pmid26694027	0.336006
insulin_reue	-	-	reue	NA
IP-10_pmid26694027	pg/ml	-	pmid26694027	0.0729942
IS-Cer-PC(35:1)_pmid25651185	-	-	pmid25651185	0.118519
IVS at end diastole (day 0)_pmid25480693	mm	IVS at end diastole	pmid25480693	NA
IVS at end diastole (day 14)_pmid25480693	mm	IVS at end diastole	pmid25480693	NA
IVS at end diastole (day 21)_pmid25480693	mm	IVS at end diastole	pmid25480693	NA
IVS at end diastole (day 7)_pmid25480693	mm	IVS at end diastole	pmid25480693	NA
IVS at end systole (day 0)_pmid25480693	mm	IVS at end systole	pmid25480693	NA
IVS at end systole (day 14)_pmid25480693	mm	IVS at end systole	pmid25480693	NA
IVS at end systole (day 21)_pmid25480693	mm	IVS at end systole	pmid25480693	NA
IVS at end systole (day 7)_pmid25480693	mm	IVS at end systole	pmid25480693	NA
IVS to PW ratio at end diastole (day 0)_pmid25480693	-	IVS to PW ratio at end diastole	pmid25480693	NA
IVS to PW ratio at end diastole (day 14)_pmid25480693	-	IVS to PW ratio at end diastole	pmid25480693	NA
IVS to PW ratio at end diastole (day 21)_pmid25480693	-	IVS to PW ratio at end diastole	pmid25480693	NA
IVS to PW ratio at end diastole (day 7)_pmid25480693	-	IVS to PW ratio at end diastole	pmid25480693	NA
IVS to PW ratio at end systole (day 0)_pmid25480693	-	IVS to PW ratio at end systole	pmid25480693	NA
IVS to PW ratio at end systole (day 14)_pmid25480693	-	IVS to PW ratio at end systole	pmid25480693	NA
IVS to PW ratio at end systole (day 21)_pmid25480693	-	IVS to PW ratio at end systole	pmid25480693	NA
IVS to PW ratio at end systole (day 7)_pmid25480693	-	IVS to PW ratio at end systole	pmid25480693	NA
KC_pmid26694027	pg/ml	-	pmid26694027	0.191359
Kidney (left)_pmid26694027	g	-	pmid26694027	0.36625
Kidney R (g)_pmid20054062	g	-	pmid20054062	0.649727
Kidney Wt_pmid25651185	g	-	pmid25651185	0.500381
Kidney/NMR_Mass_8wks_pmid25651185	-	-	pmid25651185	0.669516
LCAT_activity_pmid20054062	-	-	pmid20054062	0.74517
LDL_I (224.6-233.3 angstroms)_pmid20054062	nmol/L	-	pmid20054062	0.791263
LDL_IIa (220-224.6 angstroms)_pmid20054062	nmol/L	-	pmid20054062	0.808205
LDL_IIb (214.1-220 angstroms)_pmid20054062	nmol/L	-	pmid20054062	0.751419
LDL_IIIa (208.2-214.1 angstroms)_pmid20054062	nmol/L	-	pmid20054062	0.567277
LDL_IIIb (204.9-208.2 angstroms)_pmid20054062	nmol/L	-	pmid20054062	0.423149
LDL_IVa (199-204.9 angstroms)_pmid20054062	nmol/L	-	pmid20054062	0.432362
LDL_IVb (190-199 angstroms)_pmid20054062	nmol/L	-	pmid20054062	0.440085
LDL_IVc (180-190 angstroms)_pmid20054062	nmol/L	-	pmid20054062	0.354497
LDL_Peak_Diam_pmid20054062	angstroms	-	pmid20054062	0.44833
LDL_plus_VLDL_pmid20054062	-	-	pmid20054062	0.62122
LDL_pmid25651185	mg/dl	-	pmid25651185	0.237802
lean mass_pmid26694027	g	-	pmid26694027	0.696363
Lean_mass_pmid20054062	g	-	pmid20054062	0.697883
left atrium mass/body weight_pmid25480693	-	left atrium mass/body weight	pmid25480693	NA
left atrium mass_pmid25480693	g	left atrium mass	pmid25480693	NA
left ventricle mass/body weight_pmid25480693	-	left ventricle mass/body weight	pmid25480693	NA
left ventricle mass_pmid25480693	g	left ventricle mass	pmid25480693	NA
lesion area_pmid26694027	um^2	-	pmid26694027	0.661259
Liver / body weight_pmid26694027	fraction	-	pmid26694027	0.549936
Liver collagen_pmid26694027	g	-	pmid26694027	0.238749
liver mass/body weight_pmid25480693	-	liver mass/body weight	pmid25480693	NA
liver mass_pmid25480693	g	liver mass	pmid25480693	NA
Liver Total_pmid26694027	g	-	pmid26694027	0.594735
Liver Weight_fast	-	-	fast	0.751499
Liver Wt_pmid25651185	g	-	pmid25651185	0.623313
Liver/NMR_Mass_8wks_pmid25651185	-	-	pmid25651185	0.51519
LiverHist_pmid26694027	g	-	pmid26694027	0.512073
LiverLipids_pmid26694027	g	-	pmid26694027	0.290789
LiverMetab_pmid26694027	g	-	pmid26694027	0.272953
LiverNMR_pmid26694027	g	-	pmid26694027	0.49951
LiverResidual_pmid26694027	g	-	pmid26694027	0.44959
LiverRNA_pmid26694027	g	-	pmid26694027	0.0545988
LiverSpare_pmid26694027	g	-	pmid26694027	0.169392
log_BW_pmid20054062	-	-	pmid20054062	0.739802
log_HDL_pmid20054062	-	-	pmid20054062	0.752176
log_TG_pmid20054062	-	-	pmid20054062	0.624863
log10(Cholesteryl ester(liver))_pmid25651185	mg/g	-	pmid25651185	0.522877
log10(Phospholipids (liver))_pmid25651185	-	-	pmid25651185	0.473161
log10(Total cholesterol (liver))_pmid25651185	-	-	pmid25651185	0.499917
log10(Triglycerides (liver))_pmid25651185	-	-	pmid25651185	0.530956
log10(Unesterified cholesterol (liver))_pmid25651185	-	-	pmid25651185	0.461466
LPC(16:0)_pmid25651185	-	-	pmid25651185	0.321457
LPC(16:1)_pmid25651185	-	-	pmid25651185	0.391075
LPC(17:0)_pmid25651185	-	-	pmid25651185	0.570283
LPC(18:0)_pmid25651185	-	-	pmid25651185	0.203741
LPC(18:1)_pmid25651185	-	-	pmid25651185	0.452868
LPC(18:2)_pmid25651185	-	-	pmid25651185	0.209802
LPC(18:3)_pmid25651185	-	-	pmid25651185	0.413302
LPC(20:0)_pmid25651185	-	-	pmid25651185	0.208591
LPC(20:1)_pmid25651185	-	-	pmid25651185	0.365425
LPC(20:2)_pmid25651185	-	-	pmid25651185	0.214961
LPC(20:3)_pmid25651185	-	-	pmid25651185	0.118251
LPC(20:4)_pmid25651185	-	-	pmid25651185	0.318086
LPC(20:5)_pmid25651185	-	-	pmid25651185	0.0325716
LPC(22:4)_pmid25651185	-	-	pmid25651185	0.250237
LPC(22:5)_pmid25651185	-	-	pmid25651185	0.529611
LPC(22:6)_pmid25651185	-	-	pmid25651185	0.306101
LPC(C14:0)_pmid26694027	-	-	pmid26694027	0.253488
LPC(C16:0)a_pmid26694027	-	-	pmid26694027	0.175822
LPC(C16:0)b_pmid26694027	-	-	pmid26694027	0.344089
LPC(C16:1)a_pmid26694027	-	-	pmid26694027	0.00177643
LPC(C17:0)b_pmid26694027	-	-	pmid26694027	0.491448
LPC(C18:0)a_pmid26694027	-	-	pmid26694027	0.348701
LPC(C18:0)b_pmid26694027	-	-	pmid26694027	0.413001
LPC(C18:1)a_pmid26694027	-	-	pmid26694027	0.346306
LPC(C18:1)b_pmid26694027	-	-	pmid26694027	0.319162
LPC(C18:2)a_pmid26694027	-	-	pmid26694027	0.401582
LPC(C18:2)b_pmid26694027	-	-	pmid26694027	0.0694405
LPC(C18:3)a_pmid26694027	-	-	pmid26694027	0.610122
LPC(C18:3)b_pmid26694027	-	-	pmid26694027	0.181995
LPC(C18:3)c_pmid26694027	-	-	pmid26694027	0.318987
LPC(C20:1)a_pmid26694027	-	-	pmid26694027	0.554653
LPC(C20:2)a_pmid26694027	-	-	pmid26694027	0.711671
LPC(C20:2)b_pmid26694027	-	-	pmid26694027	0.0978441
LPC(C20:3)a_pmid26694027	-	-	pmid26694027	0.359472
LPC(C20:3)b_pmid26694027	-	-	pmid26694027	0.236127
LPC(C20:4)b_pmid26694027	-	-	pmid26694027	0.48477
LPC(C20:4)c_pmid26694027	-	-	pmid26694027	0.448286
LPC(C20:4)d_pmid26694027	-	-	pmid26694027	0.169551
LPC(C20:5)a_pmid26694027	-	-	pmid26694027	0.407141
LPC(C20:5)b_pmid26694027	-	-	pmid26694027	0.0597988
LPC(C20:5)c_pmid26694027	-	-	pmid26694027	0
LPC(C22:4)_pmid26694027	-	-	pmid26694027	0.306903
LPE(16:0)_pmid25651185	-	-	pmid25651185	0.292065
LPE(16:1)_pmid25651185	-	-	pmid25651185	0.151608
LPE(17:0)_pmid25651185	-	-	pmid25651185	0.373283
LPE(18:0)_pmid25651185	-	-	pmid25651185	0.477224
LPE(18:1)_pmid25651185	-	-	pmid25651185	0.252577
LPE(18:2)_pmid25651185	-	-	pmid25651185	0.41995
LPE(18:3)_pmid25651185	-	-	pmid25651185	0.349644
LPE(20:0)_pmid25651185	-	-	pmid25651185	0.537223
LPE(20:2)_pmid25651185	-	-	pmid25651185	0.751451
LPE(20:3)_pmid25651185	-	-	pmid25651185	0.357222
LPE(20:4)_pmid25651185	-	-	pmid25651185	0.294348
LPE(20:5)_pmid25651185	-	-	pmid25651185	0.213538
LPE(22:0)_pmid25651185	-	-	pmid25651185	0.66057
LPE(22:1)_pmid25651185	-	-	pmid25651185	0.287912
LPE(22:4)_pmid25651185	-	-	pmid25651185	0.22525
LPE(22:5)_pmid25651185	-	-	pmid25651185	0.568821
LPE(22:6)_pmid25651185	-	-	pmid25651185	0.28673
LPE(24:3)_pmid25651185	-	-	pmid25651185	0.46694
LPE(24:6)_pmid25651185	-	-	pmid25651185	0.0924383
LPE(C16:0)_pmid26694027	-	-	pmid26694027	0.565894
LPE(C18:0)a_pmid26694027	-	-	pmid26694027	0.611992
LPE(C18:0)b_pmid26694027	-	-	pmid26694027	0.62428
LPE(C18:1)a_pmid26694027	-	-	pmid26694027	0.53924
LPE(C18:1)b_pmid26694027	-	-	pmid26694027	0.471851
LPE(C18:3)_pmid26694027	-	-	pmid26694027	0.582203
LPE(C20:0)a_pmid26694027	-	-	pmid26694027	0.697882
LPE(C20:3)b_pmid26694027	-	-	pmid26694027	0.173845
LPE(C20:4)a_pmid26694027	-	-	pmid26694027	0.514126
LPE(C20:4)b_pmid26694027	-	-	pmid26694027	0.222193
LPE(C22:6)a_pmid26694027	-	-	pmid26694027	0.530131
LPE(C22:6)b_pmid26694027	-	-	pmid26694027	0
LpPLA2_pmid20054062	-	-	pmid20054062	0.369122
LPS(18:0)_pmid25651185	-	-	pmid25651185	0.520816
LPS(20:2)_pmid25651185	-	-	pmid25651185	0.909589
lung mass/body weight_pmid25480693	-	lung mass/body weight	pmid25480693	NA
lung mass_pmid25480693	g	lung mass	pmid25480693	NA
Lung Weight_pmid25651185	g	-	pmid25651185	0.082445
Lung/NMR_Mass_8wks_pmid25651185	-	-	pmid25651185	0.278782
LV mass (day 0)_pmid25480693	mg	LV mass	pmid25480693	NA
LV mass (day 14)_pmid25480693	mg	LV mass	pmid25480693	NA
LV mass (day 21)_pmid25480693	mg	LV mass	pmid25480693	NA
LV mass (day 7)_pmid25480693	mg	LV mass	pmid25480693	NA
LV volume at end diastole (day 0)_pmid25480693	ul	LV volume at end diastole	pmid25480693	NA
LV volume at end diastole (day 14)_pmid25480693	ul	LV volume at end diastole	pmid25480693	NA
LV volume at end diastole (day 21)_pmid25480693	ul	LV volume at end diastole	pmid25480693	NA
LV volume at end diastole (day 7)_pmid25480693	ul	LV volume at end diastole	pmid25480693	NA
LV volume at end systole (day 0)_pmid25480693	ul	LV volume at end systole	pmid25480693	NA
LV volume at end systole (day 14)_pmid25480693	ul	LV volume at end systole	pmid25480693	NA
LV volume at end systole (day 21)_pmid25480693	ul	LV volume at end systole	pmid25480693	NA
LV volume at end systole (day 7)_pmid25480693	ul	LV volume at end systole	pmid25480693	NA
LVID at end diastole (day 0)_pmid25480693	mm	LVID at end diastole	pmid25480693	NA
LVID at end diastole (day 14)_pmid25480693	mm	LVID at end diastole	pmid25480693	NA
LVID at end diastole (day 21)_pmid25480693	mm	LVID at end diastole	pmid25480693	NA
LVID at end diastole (day 7)_pmid25480693	mm	LVID at end diastole	pmid25480693	NA
LVID at end systole (day 0)_pmid25480693	mm	LVID at end systole	pmid25480693	NA
LVID at end systole (day 14)_pmid25480693	mm	LVID at end systole	pmid25480693	NA
LVID at end systole (day 21)_pmid25480693	mm	LVID at end systole	pmid25480693	NA
LVID at end systole (day 7)_pmid25480693	mm	LVID at end systole	pmid25480693	NA
LVM corrected for growth (day 0)_pmid25480693	-	LVM corrected for growth	pmid25480693	NA
LVM corrected for growth (day 14)_pmid25480693	-	LVM corrected for growth	pmid25480693	NA
LVM corrected for growth (day 21)_pmid25480693	-	LVM corrected for growth	pmid25480693	NA
LVM corrected for growth (day 7)_pmid25480693	-	LVM corrected for growth	pmid25480693	NA
LYM %_pmid25651185	%	Lymphocyte cells as % of White cells	pmid25651185	0.338309
LYM %_pmid26694027	% of white blood cells	Lymphocyte cells as % of White cells	pmid26694027	0.362673
LYM_pmid25651185	thousands/ul	Lymphocyte cell counts	pmid25651185	0.297866
LYM_pmid26694027	thousands/ul	Lymphocyte cell counts	pmid26694027	0.250041
LYMPH %_pmid20054062	% of white blood cells	Lymphocyte cells as % of White cells	pmid20054062	0.281125
LYMPH_pmid20054062	thousands/ul	Lymphocyte cell counts	pmid20054062	0.380242
MCH_pmid20054062	pg	Mean corpuscular hemoglobin	pmid20054062	0.501173
MCH_pmid25651185	pg	Mean corpuscular hemoglobin	pmid25651185	0.542396
MCH_pmid26694027	pg	Mean corpuscular hemoglobin	pmid26694027	0.602418
MCHC_pmid20054062	g/dl	corpuscular hemoglobin concentration	pmid20054062	0.668649
MCHC_pmid25651185	g/dl	corpuscular hemoglobin concentration	pmid25651185	0.817472
MCHC_pmid26694027	g/dl	corpuscular hemoglobin concentration	pmid26694027	0.333473
MCP-1_pmid26694027	pg/ml	-	pmid26694027	0.00741603
M-CSF_pmid26694027	pg/ml	-	pmid26694027	7.633e-17
MCV_pmid20054062	fl	Mean corpuscular volume	pmid20054062	0.925466
MCV_pmid25651185	fl	Mean corpuscular volume	pmid25651185	0.967458
MCV_pmid26694027	fl	Mean corpuscular volume	pmid26694027	0.756458
MDA_LDL_IgM_pmid20054062	-	malondialdehyde-modified LDL	pmid20054062	0.679429
Mean normalized systolic ejection rate (day 0)_pmid25480693	%/ms	Mean normalized systolic ejection rate	pmid25480693	NA
Mean normalized systolic ejection rate (day 14)_pmid25480693	%/ms	Mean normalized systolic ejection rate	pmid25480693	NA
Mean normalized systolic ejection rate (day 21)_pmid25480693	%/ms	Mean normalized systolic ejection rate	pmid25480693	NA
Mean normalized systolic ejection rate (day 7)_pmid25480693	%/ms	Mean normalized systolic ejection rate	pmid25480693	NA
Mesenteric Fat Weight_fast	-	-	fast	0.662845
Mesenteric Fat Wt_pmid25651185	g	-	pmid25651185	0.722994
Mesenteric_Fat/NMR_Mass_8wks_pmid25651185	-	-	pmid25651185	0.648873
MFP_percent_pmid20054062	%	mesenteric fat pad %	pmid20054062	0.536695
MFP_pmid20054062	g	mesenteric fat pad mass	pmid20054062	0.56459
MIG_pmid26694027	pg/ml	-	pmid26694027	0.0331708
MIP-1a_pmid26694027	pg/ml	-	pmid26694027	0.0728147
MIP-1b_pmid26694027	pg/ml	-	pmid26694027	0.0835067
MIP-2_pmid26694027	pg/ml	-	pmid26694027	3.35602e-14
mitochondrial copy number (adipose)_pmid25651185	-	mtDNA / nuclear DNA	pmid25651185	0.758364
mitochondrial copy number (heart)_pmid25651185	-	mtDNA / nuclear DNA	pmid25651185	0.612086
mitochondrial copy number (liver)_pmid25651185	-	mtDNA / nuclear DNA	pmid25651185	0.792588
Mitral inflow A to E velocity ratio (day 0)_pmid25480693	-	Mitral inflow A to E velocity ratio	pmid25480693	NA
Mitral inflow A to E velocity ratio (day 14)_pmid25480693	-	Mitral inflow A to E velocity ratio	pmid25480693	NA
Mitral inflow A to E velocity ratio (day 21)_pmid25480693	-	Mitral inflow A to E velocity ratio	pmid25480693	NA
Mitral inflow A to E velocity ratio (day 7)_pmid25480693	-	Mitral inflow A to E velocity ratio	pmid25480693	NA
Mitral inflow A velocity (day 0)_pmid25480693	mm/s	Mitral inflow A velocity	pmid25480693	NA
Mitral inflow A velocity (day 14)_pmid25480693	mm/s	Mitral inflow A velocity	pmid25480693	NA
Mitral inflow A velocity (day 21)_pmid25480693	mm/s	Mitral inflow A velocity	pmid25480693	NA
Mitral inflow A velocity (day 7)_pmid25480693	mm/s	Mitral inflow A velocity	pmid25480693	NA
Mitral inflow E to A velocity ratio (day 0)_pmid25480693	-	Mitral inflow E to A velocity ratio	pmid25480693	NA
Mitral inflow E to A velocity ratio (day 14)_pmid25480693	-	Mitral inflow E to A velocity ratio	pmid25480693	NA
Mitral inflow E to A velocity ratio (day 21)_pmid25480693	-	Mitral inflow E to A velocity ratio	pmid25480693	NA
Mitral inflow E to A velocity ratio (day 7)_pmid25480693	-	Mitral inflow E to A velocity ratio	pmid25480693	NA
Mitral inflow E velocity (day 0)_pmid25480693	mm/s	Mitral inflow E velocity	pmid25480693	NA
Mitral inflow E velocity (day 14)_pmid25480693	mm/s	Mitral inflow E velocity	pmid25480693	NA
Mitral inflow E velocity (day 21)_pmid25480693	mm/s	Mitral inflow E velocity	pmid25480693	NA
Mitral inflow E velocity (day 7)_pmid25480693	mm/s	Mitral inflow E velocity	pmid25480693	NA
MONO %_pmid20054062	% of white blood cells	Monocyte cells as % of White cells	pmid20054062	0.41692
MONO %_pmid25651185	%	Monocyte cells as % of White cells	pmid25651185	0.0558398
MONO %_pmid26694027	% of white blood cells	Monocyte cells as % of White cells	pmid26694027	0.306491
MONO_pmid20054062	thousands/ul	Monocyte cell counts	pmid20054062	0.439078
MONO_pmid25651185	thousands/ul	Monocyte cell counts	pmid25651185	0.116086
MONO_pmid26694027	thousands/ul	Monocyte cell counts	pmid26694027	0.187559
MPV_pmid20054062	fl	Mean platelet volume	pmid20054062	0.424461
MPV_pmid25651185	fl	Mean platelet volume	pmid25651185	0.298153
MPV_pmid26694027	fl	Mean platelet volume	pmid26694027	0.0934098
NMR Fat Mass 0 wks diet_pmid25651185	g	-	pmid25651185	0.751529
NMR Fat Mass 12 wks_fast	-	-	fast	0.722584
NMR Fat Mass 2 wks diet_pmid25651185	g	-	pmid25651185	0.732005
NMR Fat Mass 4 wks diet_pmid25651185	g	-	pmid25651185	0.726009
NMR Fat Mass 6 wks diet_pmid25651185	g	-	pmid25651185	0.725162
NMR Fat Mass 8 wks diet_pmid25651185	g	-	pmid25651185	0.731687
NMR Fat Mass 8 wks_fast	-	-	fast	0.713459
NMR Free Fluid (g) - 0 wks diet_pmid25651185	g	-	pmid25651185	0.372043
NMR Free Fluid (g) - 2 wks diet_pmid25651185	g	-	pmid25651185	0.371833
NMR Free Fluid (g) - 4 wks diet_pmid25651185	g	-	pmid25651185	0.498603
NMR Free Fluid (g) - 6 wks diet_pmid25651185	g	-	pmid25651185	0.509722
NMR Free Fluid (g) - 8 wks diet_pmid25651185	g	-	pmid25651185	0.464152
NMR Free Fluid 12 wks_fast	-	-	fast	0.0856874
NMR Free Fluid 8 wks_fast	-	-	fast	0.392204
NMR Lean Mass 0 wks diet_pmid25651185	g	-	pmid25651185	0.687603
NMR Lean Mass 12 wks_fast	-	-	fast	0.717526
NMR Lean Mass 2 wks diet_pmid25651185	g	-	pmid25651185	0.670452
NMR Lean Mass 4 wks diet_pmid25651185	g	-	pmid25651185	0.652578
NMR Lean Mass 6 wks diet_pmid25651185	g	-	pmid25651185	0.655915
NMR Lean Mass 8 wks diet_pmid25651185	g	-	pmid25651185	0.680198
NMR Lean Mass 8 wks_fast	-	-	fast	0.747272
NMR_BF%_0wks_pmid25651185	%	-	pmid25651185	0.758163
NMR_BF%_12wks_fast	-	-	fast	0.721194
NMR_BF%_2wks_pmid25651185	%	-	pmid25651185	0.737629
NMR_BF%_4wks_pmid25651185	%	-	pmid25651185	0.725131
NMR_BF%_6wks_pmid25651185	%	-	pmid25651185	0.722257
NMR_BF%_8wks_fast	-	-	fast	0.705611
NMR_BF%_8wks_pmid25651185	%	-	pmid25651185	0.729247
NMR_BF_percentage_pmid20054062	%	-	pmid20054062	0.709502
NMR_total_Mass_pmid20054062	g	-	pmid20054062	0.708788
NMR_TotalMass_0to2wks_pmid25651185	g	-	pmid25651185	0.612913
NMR_TotalMass_0to4wks_pmid25651185	g	-	pmid25651185	0.667247
NMR_TotalMass_0to6wks_pmid25651185	g	-	pmid25651185	0.669738
NMR_TotalMass_0to8wks_pmid25651185	g	-	pmid25651185	0.682581
NMR_TotalMass_0wks_pmid25651185	g	-	pmid25651185	0.694468
NMR_TotalMass_12wks_fast	-	-	fast	0.723437
NMR_TotalMass_2to4wks_pmid25651185	g	-	pmid25651185	0.404899
NMR_TotalMass_2to6wks_pmid25651185	g	-	pmid25651185	0.480519
NMR_TotalMass_2to8wks_pmid25651185	g	-	pmid25651185	0.519457
NMR_TotalMass_2wks_pmid25651185	g	-	pmid25651185	0.688886
NMR_TotalMass_4to6wks_pmid25651185	g	-	pmid25651185	0.261265
NMR_TotalMass_4to8wks_pmid25651185	g	-	pmid25651185	0.376717
NMR_TotalMass_4wks_pmid25651185	g	-	pmid25651185	0.695978
NMR_TotalMass_6to8wks_pmid25651185	g	-	pmid25651185	0.150357
NMR_TotalMass_6wks_pmid25651185	g	-	pmid25651185	0.689734
NMR_TotalMass_8wks_fast	-	-	fast	0.744405
NMR_TotalMass_8wks_pmid25651185	g	-	pmid25651185	0.70101
NMR_TotalMass_PercentGrowth_0to2wks_pmid25651185	%	-	pmid25651185	0.579197
NMR_TotalMass_PercentGrowth_0to4wks_pmid25651185	%	-	pmid25651185	0.636839
NMR_TotalMass_PercentGrowth_0to6wks_pmid25651185	%	-	pmid25651185	0.643216
NMR_TotalMass_PercentGrowth_0to8wks_pmid25651185	%	-	pmid25651185	0.654021
NMR_TotalMass_PercentGrowth_2to4wks_pmid25651185	%	-	pmid25651185	0.342098
NMR_TotalMass_PercentGrowth_2to6wks_pmid25651185	%	-	pmid25651185	0.416038
NMR_TotalMass_PercentGrowth_2to8wks_pmid25651185	%	-	pmid25651185	0.449579
NMR_TotalMass_PercentGrowth_4to6wks_pmid25651185	%	-	pmid25651185	0.225188
NMR_TotalMass_PercentGrowth_4to8wks_pmid25651185	%	-	pmid25651185	0.301918
NMR_TotalMass_PercentGrowth_6to8wks_pmid25651185	%	-	pmid25651185	0.0705045
PA(32:0)_pmid25651185	-	-	pmid25651185	0.591166
PA(32:1)_pmid25651185	-	-	pmid25651185	0.466927
PA(32:2)_pmid25651185	-	-	pmid25651185	0.410964
PA(34:0)_pmid25651185	-	-	pmid25651185	0.413148
PA(34:1)_pmid25651185	-	-	pmid25651185	0.212233
PA(34:2)_pmid25651185	-	-	pmid25651185	0.292446
PA(36:2)_pmid25651185	-	-	pmid25651185	0.492642
PA(36:3)_pmid25651185	-	-	pmid25651185	0.322233
PA(36:4)_pmid25651185	-	-	pmid25651185	0.0879955
PA(38:4)_pmid25651185	-	-	pmid25651185	0.106261
PA(38:5)_pmid25651185	-	-	pmid25651185	0.00936639
PA(38:6)_pmid25651185	-	-	pmid25651185	0.216958
PA(40:6)_pmid25651185	-	-	pmid25651185	0.767835
PC(32:0)_pmid25651185	-	-	pmid25651185	0.592537
PC(32:1)_pmid25651185	-	-	pmid25651185	0.548768
PC(32:2)_pmid25651185	-	-	pmid25651185	0.541035
PC(34:0)_pmid25651185	-	-	pmid25651185	0.566309
PC(34:1)_pmid25651185	-	-	pmid25651185	0.348076
PC(34:2)_pmid25651185	-	-	pmid25651185	0.152389
PC(34:3)_pmid25651185	-	-	pmid25651185	0.352472
PC(34:4)_pmid25651185	-	-	pmid25651185	0.514965
PC(36:1)_pmid25651185	-	-	pmid25651185	0.540192
PC(36:2)_pmid25651185	-	-	pmid25651185	0.103383
PC(36:3)_pmid25651185	-	-	pmid25651185	0.0467624
PC(36:4)_pmid25651185	-	-	pmid25651185	0.298097
PC(36:5)_pmid25651185	-	-	pmid25651185	0.415281
PC(36:6)_pmid25651185	-	-	pmid25651185	0.635051
PC(38:2)_pmid25651185	-	-	pmid25651185	0.520318
PC(38:3)_pmid25651185	-	-	pmid25651185	0.541495
PC(38:4)_pmid25651185	-	-	pmid25651185	0.0835422
PC(38:5)_pmid25651185	-	-	pmid25651185	0.0368237
PC(38:6)_pmid25651185	-	-	pmid25651185	0.279477
PC(40:4)_pmid25651185	-	-	pmid25651185	0.558551
PC(40:5)_pmid25651185	-	-	pmid25651185	0.680951
PC(40:6)_pmid25651185	-	-	pmid25651185	0.424656
PC(C32:0)b_pmid26694027	-	-	pmid26694027	0.452314
PC(C32:1)a_pmid26694027	-	-	pmid26694027	0.459003
PC(C34:0)_pmid26694027	-	-	pmid26694027	0.329162
PC(C34:1)_pmid26694027	-	-	pmid26694027	0.702191
PC(C34:2)a_pmid26694027	-	-	pmid26694027	0.632899
PC(C34:3)a_pmid26694027	-	-	pmid26694027	0.5524
PC(C34:3)b_pmid26694027	-	-	pmid26694027	0.636976
PC(C34:4)a_pmid26694027	-	-	pmid26694027	0.760851
PC(C34:4)b_pmid26694027	-	-	pmid26694027	0.629474
PC(C34:4)c_pmid26694027	-	-	pmid26694027	0
PC(C36:1)a_pmid26694027	-	-	pmid26694027	0.498356
PC(C36:2)_pmid26694027	-	-	pmid26694027	0.695337
PC(C36:3)a_pmid26694027	-	-	pmid26694027	0.548146
PC(C36:3)b_pmid26694027	-	-	pmid26694027	0.222303
PC(C36:4)a_pmid26694027	-	-	pmid26694027	0.299073
PC(C36:4)b_pmid26694027	-	-	pmid26694027	0.556044
PC(C36:4)c_pmid26694027	-	-	pmid26694027	0.710239
PC(C36:4)d_pmid26694027	-	-	pmid26694027	0.47462
PC(C36:4)e_pmid26694027	-	-	pmid26694027	0.63062
PC(C38:2)b_pmid26694027	-	-	pmid26694027	0.569514
PC(C38:3)a_pmid26694027	-	-	pmid26694027	0.422258
PC(C38:3)b_pmid26694027	-	-	pmid26694027	0.609347
PC(C38:4)a_pmid26694027	-	-	pmid26694027	0.147708
PC(C38:4)b_pmid26694027	-	-	pmid26694027	0.72561
PC(C38:4)e_pmid26694027	-	-	pmid26694027	0.64233
PC(C38:5)a_pmid26694027	-	-	pmid26694027	0.719972
PC(C38:5)b_pmid26694027	-	-	pmid26694027	0.753637
PC(C38:5)c_pmid26694027	-	-	pmid26694027	0.548543
PC(C38:6)a_pmid26694027	-	-	pmid26694027	0.377208
PC(C38:6)b_pmid26694027	-	-	pmid26694027	0.545497
PC(C38:6)c_pmid26694027	-	-	pmid26694027	0.709605
PC(C38:6)d_pmid26694027	-	-	pmid26694027	0.597904
PC(C38:7)b_pmid26694027	-	-	pmid26694027	0.446662
PC(C38:7)c_pmid26694027	-	-	pmid26694027	0.740492
PC(C38:7)d_pmid26694027	-	-	pmid26694027	0.539223
PC(C40:4)a_pmid26694027	-	-	pmid26694027	0.719606
PC(C40:4)b_pmid26694027	-	-	pmid26694027	0.687712
PC(C40:5)b_pmid26694027	-	-	pmid26694027	0.548437
PC(C40:6)c_pmid26694027	-	-	pmid26694027	0.666953
PC(C40:6)d_pmid26694027	-	-	pmid26694027	0.400361
PC(C40:6)e_pmid26694027	-	-	pmid26694027	0.476351
PC(C40:7)b_pmid26694027	-	-	pmid26694027	0.377323
PC(C40:7)c_pmid26694027	-	-	pmid26694027	0.643523
PC(C40:8)b_pmid26694027	-	-	pmid26694027	0.909455
PC(C40:8)c_pmid26694027	-	-	pmid26694027	0.946231
PC(C40:8)d_pmid26694027	-	-	pmid26694027	0.648588
PC(C40:8)e_pmid26694027	-	-	pmid26694027	0.801044
PC(C40:9)b_pmid26694027	-	-	pmid26694027	0.961481
PC(C40:9)d_pmid26694027	-	-	pmid26694027	0.76605
PC(C42:8)a_pmid26694027	-	-	pmid26694027	0.637472
PC(C42:8)c_pmid26694027	-	-	pmid26694027	0.619566
PC(C42:9)b_pmid26694027	-	-	pmid26694027	0.268133
PC(C42:9)d_pmid26694027	-	-	pmid26694027	0.656392
PC(C42:9)e_pmid26694027	-	-	pmid26694027	0.723504
PE(32:0)_pmid25651185	-	-	pmid25651185	0.647321
PE(34:0)_pmid25651185	-	-	pmid25651185	0.713626
PE(34:1)_pmid25651185	-	-	pmid25651185	0.387728
PE(34:2)_pmid25651185	-	-	pmid25651185	0.375872
PE(34:3)_pmid25651185	-	-	pmid25651185	0.606711
PE(34:4)_pmid25651185	-	-	pmid25651185	0.696398
PE(36:0)_pmid25651185	-	-	pmid25651185	0.549503
PE(36:1)_pmid25651185	-	-	pmid25651185	0.399758
PE(36:2)_pmid25651185	-	-	pmid25651185	0.395649
PE(36:3)_pmid25651185	-	-	pmid25651185	0.329988
PE(36:4)_pmid25651185	-	-	pmid25651185	0.315821
PE(36:5)_pmid25651185	-	-	pmid25651185	0.328284
PE(36:6)_pmid25651185	-	-	pmid25651185	0.0866066
PE(38:0)_pmid25651185	-	-	pmid25651185	0.697238
PE(38:1)_pmid25651185	-	-	pmid25651185	0.553729
PE(38:2)_pmid25651185	-	-	pmid25651185	0.549895
PE(38:3)_pmid25651185	-	-	pmid25651185	0.548219
PE(38:4)_pmid25651185	-	-	pmid25651185	0.324206
PE(38:5)_pmid25651185	-	-	pmid25651185	0.301338
PE(38:6)_pmid25651185	-	-	pmid25651185	0.185753
PE(40:1)_pmid25651185	-	-	pmid25651185	0.631427
PE(40:2)_pmid25651185	-	-	pmid25651185	0.552653
PE(40:3)_pmid25651185	-	-	pmid25651185	0.387829
PE(40:4)_pmid25651185	-	-	pmid25651185	0.517518
PE(40:5)_pmid25651185	-	-	pmid25651185	0.465446
PE(40:6)_pmid25651185	-	-	pmid25651185	0.305066
PE(C34:1)b_pmid26694027	-	-	pmid26694027	0.420919
PE(C34:2)a_pmid26694027	-	-	pmid26694027	0.644607
PE(C34:3)a_pmid26694027	-	-	pmid26694027	0.350571
PE(C36:1)a_pmid26694027	-	-	pmid26694027	0.740181
PE(C36:1)d_pmid26694027	-	-	pmid26694027	0.79625
PE(C36:2)b_pmid26694027	-	-	pmid26694027	0.500422
PE(C36:2)c_pmid26694027	-	-	pmid26694027	0.623425
PE(C36:2)d_pmid26694027	-	-	pmid26694027	0.371163
PE(C36:2)e_pmid26694027	-	-	pmid26694027	0.734591
PE(C36:3)c_pmid26694027	-	-	pmid26694027	0.472947
PE(C36:3)d_pmid26694027	-	-	pmid26694027	0.406876
PE(C36:4)a_pmid26694027	-	-	pmid26694027	0.368959
PE(C38:1)_pmid26694027	-	-	pmid26694027	0.669339
PE(C38:2)a_pmid26694027	-	-	pmid26694027	0.856836
PE(C38:2)b_pmid26694027	-	-	pmid26694027	0.440921
PE(C38:3)b_pmid26694027	-	-	pmid26694027	0
PE(C38:3)c_pmid26694027	-	-	pmid26694027	0.447047
PE(C38:3)d_pmid26694027	-	-	pmid26694027	0.571368
PE(C38:4)a_pmid26694027	-	-	pmid26694027	0.537837
PE(C38:4)c_pmid26694027	-	-	pmid26694027	0.341238
PE(C38:4)d_pmid26694027	-	-	pmid26694027	0.41072
PE(C38:4)e_pmid26694027	-	-	pmid26694027	0.45994
PE(C38:5)c_pmid26694027	-	-	pmid26694027	0.585409
PE(C38:5)d_pmid26694027	-	-	pmid26694027	0.726144
PE(C38:5)e_pmid26694027	-	-	pmid26694027	0.214944
PE(C38:6)b_pmid26694027	-	-	pmid26694027	0.368111
PE(C38:6)c_pmid26694027	-	-	pmid26694027	0.909229
PE(C38:6)e_pmid26694027	-	-	pmid26694027	0.441336
PE(C38:7)a_pmid26694027	-	-	pmid26694027	0.571706
PE(C38:7)b_pmid26694027	-	-	pmid26694027	0.511107
PE(C38:7)c_pmid26694027	-	-	pmid26694027	0.37992
PE(C40:2)_pmid26694027	-	-	pmid26694027	0.669889
PE(C40:3)c_pmid26694027	-	-	pmid26694027	0
PE(C40:4)b_pmid26694027	-	-	pmid26694027	0.532709
PE(C40:4)d_pmid26694027	-	-	pmid26694027	0.473615
PE(C40:5)b_pmid26694027	-	-	pmid26694027	0.233128
PE(C40:5)c_pmid26694027	-	-	pmid26694027	0.976106
PE(C40:5)d_pmid26694027	-	-	pmid26694027	0.683641
PE(C40:6)a_pmid26694027	-	-	pmid26694027	0.523966
PE(C40:6)b_pmid26694027	-	-	pmid26694027	0.25841
PE(C40:6)c_pmid26694027	-	-	pmid26694027	0.233624
PE(C40:7)b_pmid26694027	-	-	pmid26694027	0.504058
PE(C40:7)c_pmid26694027	-	-	pmid26694027	0.293191
PE(C40:8)a_pmid26694027	-	-	pmid26694027	0.401363
PE(C40:8)b_pmid26694027	-	-	pmid26694027	0.43306
PE(C40:8)c_pmid26694027	-	-	pmid26694027	0.742993
PE(C40:9)c_pmid26694027	-	-	pmid26694027	0.590721
PE(C42:7)b_pmid26694027	-	-	pmid26694027	0.382218
PE(C42:7)c_pmid26694027	-	-	pmid26694027	0.555625
PE(C42:8)a_pmid26694027	-	-	pmid26694027	0.403834
PE(C42:8)b_pmid26694027	-	-	pmid26694027	0.111453
PE(C42:9)c_pmid26694027	-	-	pmid26694027	0.430209
PG(C34:1)_pmid26694027	-	-	pmid26694027	0.618539
PG(C34:2)a_pmid26694027	-	-	pmid26694027	0.445609
PG(C34:2)b_pmid26694027	-	-	pmid26694027	0.351878
PG(C36:2)a_pmid26694027	-	-	pmid26694027	0.64595
PG(C36:2)b_pmid26694027	-	-	pmid26694027	0.238934
PG(C36:3)a_pmid26694027	-	-	pmid26694027	0.614
PG(C36:3)b_pmid26694027	-	-	pmid26694027	0.732811
PG(C36:4)b_pmid26694027	-	-	pmid26694027	0.591923
PG(C38:4)a_pmid26694027	-	-	pmid26694027	0.23689
PG(C38:4)b_pmid26694027	-	-	pmid26694027	0.159103
PG(C38:5)_pmid26694027	-	-	pmid26694027	0.632288
PG(C38:6)_pmid26694027	-	-	pmid26694027	0.455706
PG(C40:6)a_pmid26694027	-	-	pmid26694027	0
PG(C40:6)b_pmid26694027	-	-	pmid26694027	0.608537
PG(C40:7)a_pmid26694027	-	-	pmid26694027	0.417074
PG(C40:8)a_pmid26694027	-	-	pmid26694027	0.370987
PG(C40:8)b_pmid26694027	-	-	pmid26694027	0.649736
Phospholipids (liver)_pmid25651185	-	-	pmid25651185	0.517123
phospholipids (liver)_pmid26694027	mg/g liver	-	pmid26694027	0.259617
PI(34:2)_pmid25651185	-	-	pmid25651185	0.440042
PI(36:2)_pmid25651185	-	-	pmid25651185	0.520658
PI(36:3)_pmid25651185	-	-	pmid25651185	0.289307
PI(36:4)_pmid25651185	-	-	pmid25651185	0.462965
PI(38:3)_pmid25651185	-	-	pmid25651185	0.982838
PI(38:4)_pmid25651185	-	-	pmid25651185	0.31635
PI(38:5)_pmid25651185	-	-	pmid25651185	0.215061
PI(38:6)_pmid25651185	-	-	pmid25651185	0.616891
PI(C34:1)_pmid26694027	-	-	pmid26694027	0.539955
PI(C36:1)_pmid26694027	-	-	pmid26694027	0.394271
PI(C36:2)a_pmid26694027	-	-	pmid26694027	0.467346
PI(C36:2)b_pmid26694027	-	-	pmid26694027	0.749117
PI(C36:3)a_pmid26694027	-	-	pmid26694027	0.352516
PI(C36:3)b_pmid26694027	-	-	pmid26694027	0.862549
PI(C36:3)c_pmid26694027	-	-	pmid26694027	0.659052
PI(C36:4)_pmid26694027	-	-	pmid26694027	0.663373
PI(C38:2)a_pmid26694027	-	-	pmid26694027	0.63629
PI(C38:3)a_pmid26694027	-	-	pmid26694027	0.464482
PI(C38:3)b_pmid26694027	-	-	pmid26694027	0.666394
PI(C38:4)a_pmid26694027	-	-	pmid26694027	0.760398
PI(C38:4)b_pmid26694027	-	-	pmid26694027	0.412651
PI(C38:5)a_pmid26694027	-	-	pmid26694027	0.517363
PI(C38:5)b_pmid26694027	-	-	pmid26694027	0.369367
PI(C38:6)_pmid26694027	-	-	pmid26694027	0.440476
plasma adiponectin_pmid25651185	ug/ml	-	pmid25651185	1
plasma adiponectin_pmid25651185	-	-	pmid25651185	1
PLT_pmid20054062	thousands/ul	Platelet counts	pmid20054062	0.221449
PLT_pmid25651185	thousands/ul	Platelet counts	pmid25651185	0.269465
PLT_pmid26694027	thousands/ul	Platelet counts	pmid26694027	0.112225
PLTPactivity_pmid20054062	-	-	pmid20054062	0.400951
PON_activity_pmid20054062	-	-	pmid20054062	0.771332
PS(34:0)_pmid25651185	-	-	pmid25651185	0.44158
PS(34:1)_pmid25651185	-	-	pmid25651185	0.370137
PS(36:0)_pmid25651185	-	-	pmid25651185	0.492231
PS(36:1)_pmid25651185	-	-	pmid25651185	0.45468
PS(36:2)_pmid25651185	-	-	pmid25651185	0.432014
PS(C34:0)a_pmid26694027	-	-	pmid26694027	0.496014
PS(C34:0)b_pmid26694027	-	-	pmid26694027	0.513489
PS(C34:1)b_pmid26694027	-	-	pmid26694027	0.482691
PS(C36:0)a_pmid26694027	-	-	pmid26694027	0.131767
PS(C36:0)b_pmid26694027	-	-	pmid26694027	0.754285
PS(C36:0)c_pmid26694027	-	-	pmid26694027	0.414332
PS(C36:1)b_pmid26694027	-	-	pmid26694027	0.262058
PS(C36:2)_pmid26694027	-	-	pmid26694027	0.320931
PS(C38:0)a_pmid26694027	-	-	pmid26694027	0.275204
PS(C38:0)b_pmid26694027	-	-	pmid26694027	0.34306
PS(C38:1)a_pmid26694027	-	-	pmid26694027	0.21037
PS(C38:1)b_pmid26694027	-	-	pmid26694027	0.574805
PS(C38:4)c_pmid26694027	-	-	pmid26694027	0.639171
PS(C38:4)d_pmid26694027	-	-	pmid26694027	0.265
PS(C38:6)_pmid26694027	-	-	pmid26694027	0.413825
PS(C40:3)b_pmid26694027	-	-	pmid26694027	0.485166
PS(C40:4)a_pmid26694027	-	-	pmid26694027	0
PS(C40:6)a_pmid26694027	-	-	pmid26694027	0.638391
PS(C40:6)c_pmid26694027	-	-	pmid26694027	0.359576
PS(C40:7)a_pmid26694027	-	-	pmid26694027	0.466712
PS(C40:7)b_pmid26694027	-	-	pmid26694027	0.656136
PS(C42:4)b_pmid26694027	-	-	pmid26694027	0
PS(C42:5)b_pmid26694027	-	-	pmid26694027	0.665965
PS(C42:8)_pmid26694027	-	-	pmid26694027	0.626641
PW at end diastole (day 0)_pmid25480693	mm	PW at end diastole	pmid25480693	NA
PW at end diastole (day 14)_pmid25480693	mm	PW at end diastole	pmid25480693	NA
PW at end diastole (day 21)_pmid25480693	mm	PW at end diastole	pmid25480693	NA
PW at end diastole (day 7)_pmid25480693	mm	PW at end diastole	pmid25480693	NA
PW at end systole (day 0)_pmid25480693	mm	PW at end systole	pmid25480693	NA
PW at end systole (day 14)_pmid25480693	mm	PW at end systole	pmid25480693	NA
PW at end systole (day 21)_pmid25480693	mm	PW at end systole	pmid25480693	NA
PW at end systole (day 7)_pmid25480693	mm	PW at end systole	pmid25480693	NA
PW thickening (day 0)_pmid25480693	%	PW thickening	pmid25480693	NA
PW thickening (day 14)_pmid25480693	%	PW thickening	pmid25480693	NA
PW thickening (day 21)_pmid25480693	%	PW thickening	pmid25480693	NA
PW thickening (day 7)_pmid25480693	%	PW thickening	pmid25480693	NA
RANTES_pmid26694027	pg/ml	-	pmid26694027	8.3818e-17
RBC Time_pmid26694027	-	-	pmid26694027	0.0640622
RBC_pmid20054062	millions/ul	Red blood cell count	pmid20054062	0.470227
RBC_pmid25651185	millions/ul	Red blood cell count	pmid25651185	0.486634
RBC_pmid26694027	millions/ul	Red blood cell count	pmid26694027	0.16579
RBC_Time_pmid20054062	-	-	pmid20054062	0.163077
RDW %_pmid20054062	%	Red cell distribution width expressed as percent	pmid20054062	0.77325
RDW %_pmid25651185	%	Red cell distribution width expressed as percent	pmid25651185	0.746686
RDW %_pmid26694027	%	Red cell distribution width expressed as percent	pmid26694027	0.555936
RDWa_pmid20054062	fl	Red cell distribution width expressed as femtoliters	pmid20054062	0.842117
RDWa_pmid25651185	fl	Red cell distribution width expressed as femtoliters	pmid25651185	0.813863
RDWa_pmid26694027	fl	Red cell distribution width expressed as femtoliters	pmid26694027	0.618277
Relative syndecan-1 ectodomains (% vs C57BL/6J)_pmid20054062	-	-	pmid20054062	0.660849
Relative wall thickness at end diastole (day 0)_pmid25480693	-	Relative wall thickness at end diastole	pmid25480693	NA
Relative wall thickness at end diastole (day 14)_pmid25480693	-	Relative wall thickness at end diastole	pmid25480693	NA
Relative wall thickness at end diastole (day 21)_pmid25480693	-	Relative wall thickness at end diastole	pmid25480693	NA
Relative wall thickness at end diastole (day 7)_pmid25480693	-	Relative wall thickness at end diastole	pmid25480693	NA
Retro_Fat/NMR_Mass_8wks_pmid25651185	-	-	pmid25651185	0.578871
Retroperitoneal Fat Weight_fast	-	-	fast	0.697698
Retroperitoneal Fat Wt_pmid25651185	g	-	pmid25651185	0.631207
RFP_percent_pmid20054062	%	retroperitoneal fat pad %	pmid20054062	0.100108
RFP_pmid20054062	g	retroperitoneal fat pad mass	pmid20054062	0.723245
right atrium mass/body weight_pmid25480693	-	right atrium mass/body weight	pmid25480693	NA
right atrium mass_pmid25480693	g	right atrium mass	pmid25480693	NA
right ventricle mass/body weight_pmid25480693	-	right ventricle mass/body weight	pmid25480693	NA
right ventricle mass_pmid25480693	g	right ventricle mass	pmid25480693	NA
SAA1_pmid20054062	-	-	pmid20054062	0.209043
Sac Weight_fast	-	-	fast	0.74695
SAC weight_pmid25651185	g	-	pmid25651185	0.712248
SP(18:1)_pmid25651185	-	-	pmid25651185	0.406495
Spleen Wt_pmid25651185	g	-	pmid25651185	0.301322
Spleen/NMR_Mass_8wks_pmid25651185	-	-	pmid25651185	0.448354
Spleen_pmid26694027	g	-	pmid26694027	0.246116
Spleen_wt_pmid20054062	g	-	pmid20054062	0.660409
SPM(C34:0)_pmid26694027	-	-	pmid26694027	0.513611
SPM(C34:1)a_pmid26694027	-	-	pmid26694027	0.668001
SPM(C36:1)a_pmid26694027	-	-	pmid26694027	0.65663
SPM(C36:3)a_pmid26694027	-	-	pmid26694027	0.644169
SPM(C36:4)a_pmid26694027	-	-	pmid26694027	0.660646
SPM(C36:6)b_pmid26694027	-	-	pmid26694027	0.11104
SPM(C36:6)c_pmid26694027	-	-	pmid26694027	0.368004
SPM(C38:4)_pmid26694027	-	-	pmid26694027	0.734018
SPM(C40:1)_pmid26694027	-	-	pmid26694027	0.698882
SPM(C40:7)_pmid26694027	-	-	pmid26694027	0.374053
SubQ Fat Weight_fast	-	-	fast	0.737061
SubQ Fat Wt_pmid25651185	g	-	pmid25651185	0.702481
SubQ_Fat/NMR_Mass_8wks_pmid25651185	-	-	pmid25651185	0.687135
TAG(46:0)_pmid25651185	-	-	pmid25651185	0.158838
TAG(46:1)_pmid25651185	-	-	pmid25651185	0.0792471
TAG(48:0)_pmid25651185	-	-	pmid25651185	0.0760676
TAG(48:1)_pmid25651185	-	-	pmid25651185	0.100786
TAG(48:2)_pmid25651185	-	-	pmid25651185	0.136186
TAG(48:3)_pmid25651185	-	-	pmid25651185	0.0869638
TAG(49:1)_pmid25651185	-	-	pmid25651185	0.151497
TAG(49:2)_pmid25651185	-	-	pmid25651185	0.268513
TAG(50:0)_pmid25651185	-	-	pmid25651185	0.0845316
TAG(50:1)_pmid25651185	-	-	pmid25651185	0.27573
TAG(50:2)_pmid25651185	-	-	pmid25651185	0.18449
TAG(50:3)_pmid25651185	-	-	pmid25651185	0.0480735
TAG(50:4)_pmid25651185	-	-	pmid25651185	0.114074
TAG(50:5)_pmid25651185	-	-	pmid25651185	0.337757
TAG(51:1)_pmid25651185	-	-	pmid25651185	0.145031
TAG(51:2)_pmid25651185	-	-	pmid25651185	0.0842298
TAG(51:3)_pmid25651185	-	-	pmid25651185	0.184526
TAG(51:4)_pmid25651185	-	-	pmid25651185	0.324003
TAG(52:0)_pmid25651185	-	-	pmid25651185	0.182974
TAG(52:1)_pmid25651185	-	-	pmid25651185	0.248955
TAG(52:2)_pmid25651185	-	-	pmid25651185	0.329218
TAG(52:3)_pmid25651185	-	-	pmid25651185	0.0784898
TAG(52:4)_pmid25651185	-	-	pmid25651185	0
TAG(52:5)_pmid25651185	-	-	pmid25651185	0.123644
TAG(52:6)_pmid25651185	-	-	pmid25651185	0.217908
TAG(53:2)_pmid25651185	-	-	pmid25651185	0.155356
TAG(53:3)_pmid25651185	-	-	pmid25651185	0.189553
TAG(53:4)_pmid25651185	-	-	pmid25651185	0.0806811
TAG(53:5)_pmid25651185	-	-	pmid25651185	0.293447
TAG(54:1)_pmid25651185	-	-	pmid25651185	0.234007
TAG(54:2)_pmid25651185	-	-	pmid25651185	0.266101
TAG(54:3)_pmid25651185	-	-	pmid25651185	0.0695434
TAG(54:4)_pmid25651185	-	-	pmid25651185	0.178941
TAG(54:5)_pmid25651185	-	-	pmid25651185	0.0681378
TAG(54:6)_pmid25651185	-	-	pmid25651185	0.0614908
TAG(54:7)_pmid25651185	-	-	pmid25651185	0.0988927
TAG(55:2)_pmid25651185	-	-	pmid25651185	0.202109
TAG(55:3)_pmid25651185	-	-	pmid25651185	0.0648563
TAG(55:4)_pmid25651185	-	-	pmid25651185	0.126641
TAG(56:2)_pmid25651185	-	-	pmid25651185	0.040028
TAG(56:3)_pmid25651185	-	-	pmid25651185	0.139412
TAG(56:4)_pmid25651185	-	-	pmid25651185	0.114399
TAG(56:5)_pmid25651185	-	-	pmid25651185	0.24477
TAG(56:6)_pmid25651185	-	-	pmid25651185	0.0857697
TAG(56:7)_pmid25651185	-	-	pmid25651185	0.0964261
TAG(56:8)_pmid25651185	-	-	pmid25651185	0.182509
TAG(58:3)_pmid25651185	-	-	pmid25651185	0.302758
TAG(58:4)_pmid25651185	-	-	pmid25651185	0.876872
TAG(58:5)_pmid25651185	-	-	pmid25651185	0.378694
TAG(58:6)_pmid25651185	-	-	pmid25651185	0.144472
TAG(58:7)_pmid25651185	-	-	pmid25651185	0.00501719
TAG(58:8)_pmid25651185	-	-	pmid25651185	0.100028
TAG(C48:0)a_pmid26694027	-	-	pmid26694027	0.262375
TAG(C48:0)c_pmid26694027	-	-	pmid26694027	0.771169
TAG(C48:1)_pmid26694027	-	-	pmid26694027	0.547969
TAG(C48:2)_pmid26694027	-	-	pmid26694027	0.34642
TAG(C48:3)a_pmid26694027	-	-	pmid26694027	0.464181
TAG(C49:0)a_pmid26694027	-	-	pmid26694027	0.492828
TAG(C49:0)b_pmid26694027	-	-	pmid26694027	0.534671
TAG(C49:1)b_pmid26694027	-	-	pmid26694027	0.708219
TAG(C49:2)a_pmid26694027	-	-	pmid26694027	0.611721
TAG(C49:2)b_pmid26694027	-	-	pmid26694027	0.281859
TAG(C49:3)_pmid26694027	-	-	pmid26694027	0.393667
TAG(C50:0)b_pmid26694027	-	-	pmid26694027	0.684616
TAG(C50:0)d_pmid26694027	-	-	pmid26694027	0.827102
TAG(C50:1)_pmid26694027	-	-	pmid26694027	0.723708
TAG(C50:2)a_pmid26694027	-	-	pmid26694027	0.487873
TAG(C50:3)a_pmid26694027	-	-	pmid26694027	0.427588
TAG(C50:4)a_pmid26694027	-	-	pmid26694027	0.508467
TAG(C50:4)b_pmid26694027	-	-	pmid26694027	0.807181
TAG(C50:4)c_pmid26694027	-	-	pmid26694027	0.52842
TAG(C50:5)a_pmid26694027	-	-	pmid26694027	0.535281
TAG(C51:1)a_pmid26694027	-	-	pmid26694027	0.0693896
TAG(C51:1)b_pmid26694027	-	-	pmid26694027	0.70235
TAG(C51:1)c_pmid26694027	-	-	pmid26694027	0.49142
TAG(C51:2)a_pmid26694027	-	-	pmid26694027	0.623735
TAG(C51:3)a_pmid26694027	-	-	pmid26694027	0
TAG(C51:3)b_pmid26694027	-	-	pmid26694027	0.893233
TAG(C51:4)a_pmid26694027	-	-	pmid26694027	0.442721
TAG(C52:0)c_pmid26694027	-	-	pmid26694027	0.566965
TAG(C52:1)b_pmid26694027	-	-	pmid26694027	0.675966
TAG(C52:2)_pmid26694027	-	-	pmid26694027	0.524933
TAG(C52:3)_pmid26694027	-	-	pmid26694027	0.618019
TAG(C52:4)a_pmid26694027	-	-	pmid26694027	0.364651
TAG(C52:4)b_pmid26694027	-	-	pmid26694027	0.705936
TAG(C52:4)d_pmid26694027	-	-	pmid26694027	0.802648
TAG(C52:4)e_pmid26694027	-	-	pmid26694027	0.67647
TAG(C52:5)a_pmid26694027	-	-	pmid26694027	0.570953
TAG(C52:5)b_pmid26694027	-	-	pmid26694027	0.710946
TAG(C52:5)c_pmid26694027	-	-	pmid26694027	0.550291
TAG(C52:6)a_pmid26694027	-	-	pmid26694027	0.733873
TAG(C52:6)b_pmid26694027	-	-	pmid26694027	0.565689
TAG(C52:6)c_pmid26694027	-	-	pmid26694027	0.462228
TAG(C53:0)b_pmid26694027	-	-	pmid26694027	0.695303
TAG(C53:1)a_pmid26694027	-	-	pmid26694027	0.504192
TAG(C53:1)b_pmid26694027	-	-	pmid26694027	0.606694
TAG(C53:1)d_pmid26694027	-	-	pmid26694027	0.350258
TAG(C53:1)e_pmid26694027	-	-	pmid26694027	0.798919
TAG(C53:2)a_pmid26694027	-	-	pmid26694027	0.411182
TAG(C53:2)b_pmid26694027	-	-	pmid26694027	0.598791
TAG(C53:3)a_pmid26694027	-	-	pmid26694027	0.278688
TAG(C53:3)b_pmid26694027	-	-	pmid26694027	0.694393
TAG(C53:4)a_pmid26694027	-	-	pmid26694027	0.663345
TAG(C53:4)b_pmid26694027	-	-	pmid26694027	0.743518
TAG(C53:5)a_pmid26694027	-	-	pmid26694027	0.392279
TAG(C53:5)b_pmid26694027	-	-	pmid26694027	0.651123
TAG(C54:0)e_pmid26694027	-	-	pmid26694027	0.609853
TAG(C54:1)b_pmid26694027	-	-	pmid26694027	0.69084
TAG(C54:1)e_pmid26694027	-	-	pmid26694027	0.674858
TAG(C54:2)b_pmid26694027	-	-	pmid26694027	0.550319
TAG(C54:3)a_pmid26694027	-	-	pmid26694027	0.771945
TAG(C54:3)b_pmid26694027	-	-	pmid26694027	0.363578
TAG(C54:3)c_pmid26694027	-	-	pmid26694027	0.36921
TAG(C54:4)a_pmid26694027	-	-	pmid26694027	0.142883
TAG(C54:4)b_pmid26694027	-	-	pmid26694027	0.395876
TAG(C54:4)c_pmid26694027	-	-	pmid26694027	0.984362
TAG(C54:4)d_pmid26694027	-	-	pmid26694027	0.60472
TAG(C54:4)e_pmid26694027	-	-	pmid26694027	0.483883
TAG(C54:5)a_pmid26694027	-	-	pmid26694027	0.444019
TAG(C54:5)b_pmid26694027	-	-	pmid26694027	0.618722
TAG(C54:6)a_pmid26694027	-	-	pmid26694027	0.40293
TAG(C54:6)b_pmid26694027	-	-	pmid26694027	0.524242
TAG(C54:6)c_pmid26694027	-	-	pmid26694027	0.291749
TAG(C54:7)a_pmid26694027	-	-	pmid26694027	0.765882
TAG(C54:7)b_pmid26694027	-	-	pmid26694027	0.533414
TAG(C55:0)d_pmid26694027	-	-	pmid26694027	0.803132
TAG(C55:1)b_pmid26694027	-	-	pmid26694027	0.693787
TAG(C55:1)d_pmid26694027	-	-	pmid26694027	0.532253
TAG(C55:2)a_pmid26694027	-	-	pmid26694027	0.427426
TAG(C55:2)b_pmid26694027	-	-	pmid26694027	0.647708
TAG(C55:3)a_pmid26694027	-	-	pmid26694027	0.656888
TAG(C55:3)b_pmid26694027	-	-	pmid26694027	0.36247
TAG(C55:3)c_pmid26694027	-	-	pmid26694027	0.797895
TAG(C55:4)a_pmid26694027	-	-	pmid26694027	0.614333
TAG(C55:5)a_pmid26694027	-	-	pmid26694027	0.141833
TAG(C55:5)b_pmid26694027	-	-	pmid26694027	0.812961
TAG(C55:6)a_pmid26694027	-	-	pmid26694027	0.613902
TAG(C55:6)b_pmid26694027	-	-	pmid26694027	0.691882
TAG(C56:1)a_pmid26694027	-	-	pmid26694027	0.513507
TAG(C56:1)b_pmid26694027	-	-	pmid26694027	0.715592
TAG(C56:2)a_pmid26694027	-	-	pmid26694027	0.362857
TAG(C56:2)c_pmid26694027	-	-	pmid26694027	0.906101
TAG(C56:3)a_pmid26694027	-	-	pmid26694027	0.549327
TAG(C56:3)b_pmid26694027	-	-	pmid26694027	0.424731
TAG(C56:3)c_pmid26694027	-	-	pmid26694027	0.706481
TAG(C56:4)a_pmid26694027	-	-	pmid26694027	0.493678
TAG(C56:4)b_pmid26694027	-	-	pmid26694027	0.814969
TAG(C56:4)c_pmid26694027	-	-	pmid26694027	0.688355
TAG(C56:5)a_pmid26694027	-	-	pmid26694027	0.308767
TAG(C56:5)b_pmid26694027	-	-	pmid26694027	0.718679
TAG(C56:6)a_pmid26694027	-	-	pmid26694027	0.51334
TAG(C56:6)c_pmid26694027	-	-	pmid26694027	0.141113
TAG(C56:7)a_pmid26694027	-	-	pmid26694027	0.39814
TAG(C56:7)b_pmid26694027	-	-	pmid26694027	0.750453
TAG(C56:7)c_pmid26694027	-	-	pmid26694027	0.607169
TAG(C56:8)a_pmid26694027	-	-	pmid26694027	0.683946
TAG(C57:0)_pmid26694027	-	-	pmid26694027	0.591962
TAG(C57:1)c_pmid26694027	-	-	pmid26694027	0.715629
TAG(C57:2)_pmid26694027	-	-	pmid26694027	0.375822
TAG(C57:3)_pmid26694027	-	-	pmid26694027	0.371393
TAG(C57:4)a_pmid26694027	-	-	pmid26694027	0.560481
TAG(C57:4)b_pmid26694027	-	-	pmid26694027	0.42287
TAG(C57:4)c_pmid26694027	-	-	pmid26694027	0.753056
TAG(C57:5)a_pmid26694027	-	-	pmid26694027	0.661746
TAG(C58:1)a_pmid26694027	-	-	pmid26694027	0.32867
TAG(C58:10)a_pmid26694027	-	-	pmid26694027	0.565424
TAG(C58:10)b_pmid26694027	-	-	pmid26694027	0.547476
TAG(C58:2)a_pmid26694027	-	-	pmid26694027	0.578979
TAG(C58:2)b_pmid26694027	-	-	pmid26694027	0.654347
TAG(C58:3)a_pmid26694027	-	-	pmid26694027	0.56676
TAG(C58:4)a_pmid26694027	-	-	pmid26694027	0.61311
TAG(C58:4)b_pmid26694027	-	-	pmid26694027	0.706608
TAG(C58:5)a_pmid26694027	-	-	pmid26694027	0.593158
TAG(C58:5)b_pmid26694027	-	-	pmid26694027	0.820718
TAG(C58:6)a_pmid26694027	-	-	pmid26694027	0.893989
TAG(C58:6)b_pmid26694027	-	-	pmid26694027	0.349373
TAG(C58:6)c_pmid26694027	-	-	pmid26694027	0.733293
TAG(C58:6)d_pmid26694027	-	-	pmid26694027	0.51788
TAG(C58:7)b_pmid26694027	-	-	pmid26694027	0.754495
TAG(C58:7)d_pmid26694027	-	-	pmid26694027	0.549992
TAG(C58:7)e_pmid26694027	-	-	pmid26694027	0.719367
TAG(C58:8)b_pmid26694027	-	-	pmid26694027	0.509172
TAG(C58:8)c_pmid26694027	-	-	pmid26694027	0.788557
TAG(C58:8)d_pmid26694027	-	-	pmid26694027	0.734905
TAG(C58:9)a_pmid26694027	-	-	pmid26694027	0.708777
TAG(C58:9)b_pmid26694027	-	-	pmid26694027	0.337201
TAG(C60:10)a_pmid26694027	-	-	pmid26694027	0.0994804
TAG(C60:10)b_pmid26694027	-	-	pmid26694027	0.78592
TAG(C60:8)_pmid26694027	-	-	pmid26694027	0.648365
TAG(C60:9)c_pmid26694027	-	-	pmid26694027	0.719735
TNFa_pmid26694027	pg/ml	-	pmid26694027	0.00132593
Tot chol._pmid25651185	mg/dl	-	pmid25651185	0.688286
Total cholesterol (liver)_pmid25651185	-	-	pmid25651185	0.467509
total cholesterol (liver)_pmid26694027	mg/g liver	-	pmid26694027	0.393318
total cholesterol (pre-bleed)_pmid26694027	mg/dl	-	pmid26694027	0.627874
total cholesterol_fast	-	-	fast	0.832916
total cholesterol_pmid20054062	mg/dl	-	pmid20054062	0.747587
total cholesterol_pmid25480693	mg/dl	total cholesterol	pmid25480693	NA
total cholesterol_pmid26694027	mg/dl	-	pmid26694027	0.438985
total heart mass/body weight_pmid25480693	-	total heart mass/body weight	pmid25480693	NA
total heart mass_pmid25480693	g	total heart mass	pmid25480693	NA
total liver weighed_pmid26694027	g	-	pmid26694027	0.51554
Trigly._pmid25651185	mg/dl	-	pmid25651185	0.544197
triglyceride_reue	-	-	reue	NA
Triglycerides (liver)_pmid25651185	-	-	pmid25651185	0.569296
triglycerides (liver)_pmid26694027	mg/g liver	-	pmid26694027	0.420945
triglycerides (pre-bleed)_pmid26694027	mg/dl	-	pmid26694027	0.617225
triglycerides_fast	-	-	fast	0.703826
triglycerides_pmid20054062	mg/dl	-	pmid20054062	0.505342
triglycerides_pmid25480693	mg/dl	triglycerides	pmid25480693	NA
triglycerides_pmid26694027	mg/dl	-	pmid26694027	0.333876
UC_pmid25651185	mg/dl	-	pmid25651185	0.750864
Unesterified cholesterol (liver)_pmid25651185	-	-	pmid25651185	0.531505
unesterified cholesterol (liver)_pmid26694027	mg/g liver	-	pmid26694027	0.423292
unesterified cholesterol (pre-bleed)_pmid26694027	mg/dl	-	pmid26694027	0.5984
unesterified cholesterol_fast	-	-	fast	0.767724
unesterified cholesterol_pmid20054062	mg/dl	-	pmid20054062	0.715447
unesterified cholesterol_pmid25480693	mg/dl	unesterified cholesterol	pmid25480693	NA
unesterified cholesterol_pmid26694027	mg/dl	-	pmid26694027	0.391305
Velocity of circumferential shortening (day 0)_pmid25480693	%/ms	Velocity of circumferential shortening	pmid25480693	NA
Velocity of circumferential shortening (day 14)_pmid25480693	%/ms	Velocity of circumferential shortening	pmid25480693	NA
Velocity of circumferential shortening (day 21)_pmid25480693	%/ms	Velocity of circumferential shortening	pmid25480693	NA
Velocity of circumferential shortening (day 7)_pmid25480693	%/ms	Velocity of circumferential shortening	pmid25480693	NA
Visceral Fat/NMR_Mass_8wks_pmid25651185	-	-	pmid25651185	0.732952
Visceral Fat_pmid25651185	-	-	pmid25651185	0.738693
VLDL_int (335-424 angstroms)_pmid20054062	nmol/L	-	pmid20054062	0.483556
VLDL_lg (424-547 angstroms)_pmid20054062	nmol/L	-	pmid20054062	0.378916
VLDL_sm (296-335 angstroms)_pmid20054062	nmol/L	-	pmid20054062	0.598089
VLDL+LDL (pre-bleed)_pmid26694027	mg/dl	total cholesterol (pre-bleed) - HDL (pre-bleed)	pmid26694027	0.582742
VLDL+LDL_pmid26694027	mg/dl	-	pmid26694027	0.427422
WBC Time_pmid26694027	-	-	pmid26694027	0.00202797
WBC_pmid20054062	thousands/ul	White cell counts (lymphocytes + granulocytes + monocytes)	pmid20054062	0.381212
WBC_pmid25651185	thousands/ul	White cell counts (lymphocytes + granulocytes + monocytes)	pmid25651185	0.249431
WBC_pmid26694027	thousands/ul	White cell counts (lymphocytes + granulocytes + monocytes)	pmid26694027	0.216553
WBC_Time_pmid20054062	-	-	pmid20054062	0.727882
Weight-0 wks diet_pmid25651185	g	-	pmid25651185	0.704027
Weight-2 wks diet_pmid25651185	g	-	pmid25651185	0.688904
Weight-4 wks diet_pmid25651185	g	-	pmid25651185	0.714024
Weight-6 wks diet_pmid25651185	g	-	pmid25651185	0.720828
Weight-8 wks diet_pmid25651185	g	-	pmid25651185	0.705791
