# Supplementary material for: Proteome-wide systems genetics identifies UFMylation as a regulator of skeletal muscle function
Source: eLife. 2022 Dec 6;11:e82951. doi: 10.7554/eLife.82951 (PMC9833826; doi:10.7554/eLife.82951)
Supplement: Supplementary file 5. — Table contains QTLs (p < 1×10−4) including chromosome, genomic location, including Pubmed ID sources. Related to Figures 2 and 3. [file elife-82951-supp5.xlsx]

## Sheet: Table_S5
SNP	CHR	BP	P	trait_name	study	units	trait_description
rs13461552	1	182314667	3.63536e-08	Food Intake - Day 1	pmid25651185	g	NULL
rs13461552	1	182314667	2.159e-07	BF	pmid25651185	%	(final % - initial %) / initial %
rs13461552	1	182314667	1.77366e-09	Food Intake AVG - 4 Wks Diet	pmid25651185	g	NULL
rs13461553	1	182313909	8.74093e-07	Food Intake AVG - 4 Wks Diet	pmid25651185	g	NULL
rs13464421	1	172194866	2.83011e-07	KC	pmid26694027	pg/ml	NULL
rs13470411	1	171288826	2.60591e-07	KC	pmid26694027	pg/ml	NULL
rs13476248	1	174151673	4.30366e-07	KC	pmid26694027	pg/ml	NULL
rs13476258	1	176982608	5.33254e-07	Food Intake - Day 1	pmid25651185	g	NULL
rs13500339	1	192964641	7.09851e-07	MIP-1b	pmid26694027	pg/ml	NULL
rs16798075	1	180996539	1.19287e-08	Food Intake - Day 1	pmid25651185	g	NULL
rs16798075	1	180996539	1.20603e-07	BF	pmid25651185	%	(final % - initial %) / initial %
rs16798075	1	180996539	1.50773e-09	Food Intake AVG - 4 Wks Diet	pmid25651185	g	NULL
rs29893293	1	62165416	1.0236e-07	BF	pmid25651185	%	(final % - initial %) / initial %
rs30077601	1	63846185	3.77235e-13	grip	reue	NA	NA
rs30077601	1	63846185	5.27985e-08	gripbw	reue	NA	NA
rs30096839	1	63998987	3.04212e-08	Food Intake - Day 1	pmid25651185	g	NULL
rs30192291	1	79398944	9.38414e-07	LVID at end systole (day 0)	pmid25480693	mm	LVID at end systole
rs30462815	1	171258252	2.60591e-07	KC	pmid26694027	pg/ml	NULL
rs30463665	1	172867382	3.52797e-08	KC	pmid26694027	pg/ml	NULL
rs30464739	1	136383933	7.71602e-09	MIP-1b	pmid26694027	pg/ml	NULL
rs30465812	1	168210506	3.00889e-07	total cholesterol	pmid20054062	mg/dl	NULL
rs30465812	1	168210506	3.10365e-08	HDL	pmid20054062	mg/dl	NULL
rs30471465	1	137493904	6.92701e-07	IL-1b	pmid26694027	pg/ml	NULL
rs30497749	1	181862435	7.72729e-09	Food Intake - Day 1	pmid25651185	g	NULL
rs30497749	1	181862435	1.11411e-07	BF	pmid25651185	%	(final % - initial %) / initial %
rs30497749	1	181862435	1.81767e-09	Food Intake AVG - 4 Wks Diet	pmid25651185	g	NULL
rs30500323	1	181364095	8.06106e-07	Food Intake AVG - 4 Wks Diet	pmid25651185	g	NULL
rs30500323	1	181364095	7.57656e-07	Food Intake - Day 3	pmid25651185	g	NULL
rs30508085	1	178658783	1.51171e-08	Food Intake - Day 1	pmid25651185	g	NULL
rs30508085	1	178658783	2.50676e-09	Food Intake AVG - 4 Wks Diet	pmid25651185	g	NULL
rs30513434	1	181678034	2.48651e-09	Food Intake - Day 1	pmid25651185	g	NULL
rs30513434	1	181678034	1.43816e-07	BF	pmid25651185	%	(final % - initial %) / initial %
rs30513434	1	181678034	7.1111e-10	Food Intake AVG - 4 Wks Diet	pmid25651185	g	NULL
rs30513596	1	180131090	7.38146e-07	Food Intake AVG - 4 Wks Diet	pmid25651185	g	NULL
rs30513596	1	180131090	9.93533e-08	Food Intake - Day 3	pmid25651185	g	NULL
rs30515619	1	182628574	7.68177e-09	Food Intake - Day 1	pmid25651185	g	NULL
rs30515619	1	182628574	9.23473e-08	BF	pmid25651185	%	(final % - initial %) / initial %
rs30515619	1	182628574	1.73387e-09	Food Intake AVG - 4 Wks Diet	pmid25651185	g	NULL
rs30525830	1	182355639	3.63536e-08	Food Intake - Day 1	pmid25651185	g	NULL
rs30525830	1	182355639	2.159e-07	BF	pmid25651185	%	(final % - initial %) / initial %
rs30525830	1	182355639	1.77366e-09	Food Intake AVG - 4 Wks Diet	pmid25651185	g	NULL
rs30538221	1	107472635	2.17231e-08	G-CSF	pmid26694027	pg/ml	NULL
rs30538723	1	176453793	1.96722e-07	Food Intake - Day 1	pmid25651185	g	NULL
rs30538723	1	176453793	6.23638e-07	Food Intake AVG - 4 Wks Diet	pmid25651185	g	NULL
rs30539187	1	107457926	2.17231e-08	G-CSF	pmid26694027	pg/ml	NULL
rs30539960	1	107471718	2.17231e-08	G-CSF	pmid26694027	pg/ml	NULL
rs30540796	1	107471214	2.17231e-08	G-CSF	pmid26694027	pg/ml	NULL
rs30546296	1	177017090	5.19058e-08	Food Intake - Day 1	pmid25651185	g	NULL
rs30546296	1	177017090	4.7548e-10	Food Intake AVG - 4 Wks Diet	pmid25651185	g	NULL
rs30549892	1	179026744	4.95148e-09	Food Intake - Day 1	pmid25651185	g	NULL
rs30549892	1	179026744	1.78807e-09	Food Intake AVG - 4 Wks Diet	pmid25651185	g	NULL
rs30551368	1	168279177	1.50693e-10	total cholesterol	pmid20054062	mg/dl	NULL
rs30551368	1	168279177	4.85811e-13	HDL	pmid20054062	mg/dl	NULL
rs30551653	1	179319517	1.52048e-09	Food Intake - Day 1	pmid25651185	g	NULL
rs30551653	1	179319517	3.28357e-10	Food Intake AVG - 4 Wks Diet	pmid25651185	g	NULL
rs30553612	1	181800197	7.68177e-09	Food Intake - Day 1	pmid25651185	g	NULL
rs30553612	1	181800197	9.23473e-08	BF	pmid25651185	%	(final % - initial %) / initial %
rs30553612	1	181800197	1.73387e-09	Food Intake AVG - 4 Wks Diet	pmid25651185	g	NULL
rs30553726	1	176418167	1.0679e-07	Food Intake - Day 1	pmid25651185	g	NULL
rs30553726	1	176418167	2.36132e-07	Food Intake AVG - 4 Wks Diet	pmid25651185	g	NULL
rs30555169	1	136719375	7.77707e-09	MIP-1b	pmid26694027	pg/ml	NULL
rs30559613	1	182380627	7.68177e-09	Food Intake - Day 1	pmid25651185	g	NULL
rs30559613	1	182380627	9.23473e-08	BF	pmid25651185	%	(final % - initial %) / initial %
rs30559613	1	182380627	1.73387e-09	Food Intake AVG - 4 Wks Diet	pmid25651185	g	NULL
rs30562863	1	177763194	1.20567e-08	Food Intake - Day 1	pmid25651185	g	NULL
rs30562863	1	177763194	3.05905e-10	Food Intake AVG - 4 Wks Diet	pmid25651185	g	NULL
rs30572429	1	170283550	1.63846e-11	total cholesterol	pmid20054062	mg/dl	NULL
rs30572429	1	170283550	9.33991e-14	HDL	pmid20054062	mg/dl	NULL
rs30573392	1	172495844	2.7236e-09	KC	pmid26694027	pg/ml	NULL
rs30593223	1	178358959	1.22813e-08	Food Intake - Day 1	pmid25651185	g	NULL
rs30593223	1	178358959	2.05623e-09	Food Intake AVG - 4 Wks Diet	pmid25651185	g	NULL
rs30594570	1	178666042	1.52048e-09	Food Intake - Day 1	pmid25651185	g	NULL
rs30594570	1	178666042	3.28357e-10	Food Intake AVG - 4 Wks Diet	pmid25651185	g	NULL
rs30595122	1	180287725	9.59931e-07	Food Intake - Day 3	pmid25651185	g	NULL
rs30597953	1	178189220	1.12963e-07	Food Intake - Day 1	pmid25651185	g	NULL
rs30597953	1	178189220	1.57428e-08	Food Intake AVG - 4 Wks Diet	pmid25651185	g	NULL
rs30598774	1	179242018	1.57353e-08	Food Intake - Day 1	pmid25651185	g	NULL
rs30598774	1	179242018	5.91016e-10	Food Intake AVG - 4 Wks Diet	pmid25651185	g	NULL
rs30600088	1	178105892	1.27489e-08	Food Intake - Day 1	pmid25651185	g	NULL
rs30600088	1	178105892	2.15819e-09	Food Intake AVG - 4 Wks Diet	pmid25651185	g	NULL
rs30600458	1	112531214	7.77465e-07	G-CSF	pmid26694027	pg/ml	NULL
rs30600558	1	112560202	7.77465e-07	G-CSF	pmid26694027	pg/ml	NULL
rs30600560	1	112559985	7.77465e-07	G-CSF	pmid26694027	pg/ml	NULL
rs30602302	1	112547712	7.77465e-07	G-CSF	pmid26694027	pg/ml	NULL
rs30605807	1	112538200	7.77465e-07	G-CSF	pmid26694027	pg/ml	NULL
rs30606378	1	180834436	7.33761e-08	Food Intake - Day 1	pmid25651185	g	NULL
rs30606378	1	180834436	2.18096e-07	BF	pmid25651185	%	(final % - initial %) / initial %
rs30606378	1	180834436	3.81536e-09	Food Intake AVG - 4 Wks Diet	pmid25651185	g	NULL
rs30614288	1	172867505	3.52797e-08	KC	pmid26694027	pg/ml	NULL
rs30618470	1	177080853	1.94913e-08	Food Intake AVG - 4 Wks Diet	pmid25651185	g	NULL
rs30621240	1	176991512	5.89173e-07	Food Intake - Day 1	pmid25651185	g	NULL
rs30621240	1	176991512	1.25048e-09	Food Intake AVG - 4 Wks Diet	pmid25651185	g	NULL
rs30623481	1	192966637	7.09851e-07	MIP-1b	pmid26694027	pg/ml	NULL
rs30625407	1	112575166	7.77465e-07	G-CSF	pmid26694027	pg/ml	NULL
rs30625408	1	112575125	7.77465e-07	G-CSF	pmid26694027	pg/ml	NULL
rs30627175	1	112572984	7.77465e-07	G-CSF	pmid26694027	pg/ml	NULL
rs30647144	1	178896200	2.09309e-08	Food Intake - Day 1	pmid25651185	g	NULL
rs30647144	1	178896200	8.86321e-09	Food Intake AVG - 4 Wks Diet	pmid25651185	g	NULL
rs30648949	1	179249281	5.99836e-09	Food Intake - Day 1	pmid25651185	g	NULL
rs30648949	1	179249281	6.64686e-10	Food Intake AVG - 4 Wks Diet	pmid25651185	g	NULL
rs30652012	1	181791635	7.68177e-09	Food Intake - Day 1	pmid25651185	g	NULL
rs30652012	1	181791635	9.23473e-08	BF	pmid25651185	%	(final % - initial %) / initial %
rs30652012	1	181791635	1.73387e-09	Food Intake AVG - 4 Wks Diet	pmid25651185	g	NULL
rs30656935	1	180745359	1.78505e-08	Food Intake - Day 1	pmid25651185	g	NULL
rs30656935	1	180745359	9.03904e-08	BF	pmid25651185	%	(final % - initial %) / initial %
rs30656935	1	180745359	7.97785e-09	Food Intake AVG - 4 Wks Diet	pmid25651185	g	NULL
rs30657110	1	175778978	7.08732e-07	Food Intake - Day 2	pmid25651185	g	NULL
rs30657110	1	175778978	5.46499e-09	Food Intake AVG - 4 Wks Diet	pmid25651185	g	NULL
rs30657110	1	175778978	7.87733e-09	Food Intake - Day 3	pmid25651185	g	NULL
rs30659930	1	179302423	1.57353e-08	Food Intake - Day 1	pmid25651185	g	NULL
rs30659930	1	179302423	5.91016e-10	Food Intake AVG - 4 Wks Diet	pmid25651185	g	NULL
rs30667048	1	178496921	2.73559e-08	Food Intake - Day 1	pmid25651185	g	NULL
rs30667048	1	178496921	1.62763e-09	Food Intake AVG - 4 Wks Diet	pmid25651185	g	NULL
rs30668944	1	177358644	5.70684e-09	Food Intake - Day 1	pmid25651185	g	NULL
rs30668944	1	177358644	2.32258e-10	Food Intake AVG - 4 Wks Diet	pmid25651185	g	NULL
rs30671542	1	170459563	5.70214e-07	total cholesterol	pmid20054062	mg/dl	NULL
rs30671542	1	170459563	9.24591e-08	HDL	pmid20054062	mg/dl	NULL
rs30672856	1	179651259	4.18544e-07	Food Intake - Day 1	pmid25651185	g	NULL
rs30672856	1	179651259	3.25943e-08	Food Intake AVG - 4 Wks Diet	pmid25651185	g	NULL
rs30680088	1	176453829	7.51663e-08	Food Intake - Day 1	pmid25651185	g	NULL
rs30680088	1	176453829	2.88876e-07	Food Intake AVG - 4 Wks Diet	pmid25651185	g	NULL
rs30688838	1	172093547	2.83011e-07	KC	pmid26694027	pg/ml	NULL
rs30698612	1	136720242	7.74061e-09	MIP-1b	pmid26694027	pg/ml	NULL
rs30702127	1	180005861	9.99362e-07	Food Intake AVG - 4 Wks Diet	pmid25651185	g	NULL
rs30702127	1	180005861	5.05454e-07	Food Intake - Day 3	pmid25651185	g	NULL
rs30707128	1	177341034	9.29914e-08	Food Intake - Day 1	pmid25651185	g	NULL
rs30707128	1	177341034	2.43061e-09	Food Intake AVG - 4 Wks Diet	pmid25651185	g	NULL
rs30707962	1	174621771	9.65773e-10	KC	pmid26694027	pg/ml	NULL
rs30707962	1	174621771	5.6022e-07	Food Intake - Day 3	pmid25651185	g	NULL
rs30708189	1	181528298	7.63867e-07	BF	pmid25651185	%	(final % - initial %) / initial %
rs30708189	1	181528298	3.41126e-07	FatMass	pmid25651185	%	NULL
rs30708189	1	181528298	8.87438e-07	Food Intake - Day 1	pmid25651185	g	NULL
rs30708189	1	181528298	4.79423e-10	BF	pmid25651185	%	(final % - initial %) / initial %
rs30708189	1	181528298	9.74747e-08	Food Intake AVG - 4 Wks Diet	pmid25651185	g	NULL
rs30711102	1	168533188	1.20746e-07	HDL	pmid20054062	mg/dl	NULL
rs30711102	1	168533188	2.13374e-07	total cholesterol	pmid20054062	mg/dl	NULL
rs30716099	1	177053161	8.06023e-09	Food Intake - Day 1	pmid25651185	g	NULL
rs30716099	1	177053161	1.77254e-10	Food Intake AVG - 4 Wks Diet	pmid25651185	g	NULL
rs30716338	1	179050657	2.09849e-08	Food Intake - Day 1	pmid25651185	g	NULL
rs30716338	1	179050657	3.80464e-10	Food Intake AVG - 4 Wks Diet	pmid25651185	g	NULL
rs30718063	1	114457498	1.03404e-11	grip	reue	NA	NA
rs30718063	1	114457498	7.19335e-07	gripbw	reue	NA	NA
rs30718255	1	171744758	2.83011e-07	KC	pmid26694027	pg/ml	NULL
rs30733177	1	120831132	9.09291e-07	G-CSF	pmid26694027	pg/ml	NULL
rs30748191	1	178789464	5.74475e-07	Food Intake - Day 1	pmid25651185	g	NULL
rs30748191	1	178789464	9.25185e-08	Food Intake AVG - 4 Wks Diet	pmid25651185	g	NULL
rs30753259	1	180499778	2.48651e-09	Food Intake - Day 1	pmid25651185	g	NULL
rs30753259	1	180499778	1.43816e-07	BF	pmid25651185	%	(final % - initial %) / initial %
rs30753259	1	180499778	7.1111e-10	Food Intake AVG - 4 Wks Diet	pmid25651185	g	NULL
rs30764312	1	171761892	2.24509e-07	Food Intake AVG - 4 Wks Diet	pmid25651185	g	NULL
rs30764797	1	182692886	2.67092e-08	Food Intake - Day 1	pmid25651185	g	NULL
rs30764797	1	182692886	9.24933e-08	BF	pmid25651185	%	(final % - initial %) / initial %
rs30764797	1	182692886	3.46323e-09	Food Intake AVG - 4 Wks Diet	pmid25651185	g	NULL
rs30764981	1	179790600	2.77411e-07	Food Intake - Day 1	pmid25651185	g	NULL
rs30764981	1	179790600	5.87723e-09	Food Intake AVG - 4 Wks Diet	pmid25651185	g	NULL
rs30765442	1	181582408	2.48651e-09	Food Intake - Day 1	pmid25651185	g	NULL
rs30765442	1	181582408	1.43816e-07	BF	pmid25651185	%	(final % - initial %) / initial %
rs30765442	1	181582408	7.1111e-10	Food Intake AVG - 4 Wks Diet	pmid25651185	g	NULL
rs30805238	1	178430600	1.22813e-08	Food Intake - Day 1	pmid25651185	g	NULL
rs30805238	1	178430600	2.05623e-09	Food Intake AVG - 4 Wks Diet	pmid25651185	g	NULL
rs30817334	1	180470532	4.32844e-08	Food Intake - Day 1	pmid25651185	g	NULL
rs30817334	1	180470532	3.06852e-07	BF	pmid25651185	%	(final % - initial %) / initial %
rs30817334	1	180470532	7.96203e-09	Food Intake AVG - 4 Wks Diet	pmid25651185	g	NULL
rs30821563	1	136284278	5.09807e-09	MIP-1b	pmid26694027	pg/ml	NULL
rs30833462	1	130271569	3.82279e-07	G-CSF	pmid26694027	pg/ml	NULL
rs30838917	1	136812624	1.55062e-07	MIP-1b	pmid26694027	pg/ml	NULL
rs30845350	1	136431800	5.09807e-09	MIP-1b	pmid26694027	pg/ml	NULL
rs30845868	1	172823941	2.24984e-08	KC	pmid26694027	pg/ml	NULL
rs30851064	1	180278950	2.44215e-07	Food Intake - Day 1	pmid25651185	g	NULL
rs30851064	1	180278950	7.56717e-09	Food Intake AVG - 4 Wks Diet	pmid25651185	g	NULL
rs30851396	1	175549598	9.30916e-07	Food Intake - Day 1	pmid25651185	g	NULL
rs30853259	1	174988981	5.01603e-09	KC	pmid26694027	pg/ml	NULL
rs30855445	1	172865246	4.0092e-11	KC	pmid26694027	pg/ml	NULL
rs30856121	1	175292528	2.27738e-07	Food Intake - Day 1	pmid25651185	g	NULL
rs30856121	1	175292528	6.87956e-07	Food Intake AVG - 4 Wks Diet	pmid25651185	g	NULL
rs30860812	1	136596414	6.30275e-07	MIP-1b	pmid26694027	pg/ml	NULL
rs30862920	1	171191690	2.60591e-07	KC	pmid26694027	pg/ml	NULL
rs30867548	1	176982476	8.06924e-09	Food Intake - Day 1	pmid25651185	g	NULL
rs30867548	1	176982476	1.52466e-10	Food Intake AVG - 4 Wks Diet	pmid25651185	g	NULL
rs30869687	1	171357343	9.63367e-08	Food Intake AVG - 4 Wks Diet	pmid25651185	g	NULL
rs30879884	1	136352118	5.09807e-09	MIP-1b	pmid26694027	pg/ml	NULL
rs30880586	1	136304895	5.09807e-09	MIP-1b	pmid26694027	pg/ml	NULL
rs30880587	1	136304870	5.09807e-09	MIP-1b	pmid26694027	pg/ml	NULL
rs30881712	1	136252264	1.12066e-09	MIP-1b	pmid26694027	pg/ml	NULL
rs30882341	1	136362126	5.09807e-09	MIP-1b	pmid26694027	pg/ml	NULL
rs30882342	1	136362087	5.09807e-09	MIP-1b	pmid26694027	pg/ml	NULL
rs30882575	1	136252098	1.12066e-09	MIP-1b	pmid26694027	pg/ml	NULL
rs30882578	1	136251877	1.12066e-09	MIP-1b	pmid26694027	pg/ml	NULL
rs30882583	1	136251431	5.09807e-09	MIP-1b	pmid26694027	pg/ml	NULL
rs30882930	1	136190925	5.09807e-09	MIP-1b	pmid26694027	pg/ml	NULL
rs30883105	1	136361965	5.09807e-09	MIP-1b	pmid26694027	pg/ml	NULL
rs30883551	1	136249856	1.12066e-09	MIP-1b	pmid26694027	pg/ml	NULL
rs30883966	1	136126896	5.88354e-12	MIP-1b	pmid26694027	pg/ml	NULL
rs30884316	1	136374307	5.09807e-09	MIP-1b	pmid26694027	pg/ml	NULL
rs30884322	1	136373284	5.09807e-09	MIP-1b	pmid26694027	pg/ml	NULL
rs30884461	1	136249116	5.09807e-09	MIP-1b	pmid26694027	pg/ml	NULL
rs30884463	1	136249017	1.12066e-09	MIP-1b	pmid26694027	pg/ml	NULL
rs30884759	1	175348667	3.58128e-07	Food Intake AVG - 4 Wks Diet	pmid25651185	g	NULL
rs30884759	1	175348667	3.34917e-07	Food Intake - Day 3	pmid25651185	g	NULL
rs30885241	1	136150687	5.09807e-09	MIP-1b	pmid26694027	pg/ml	NULL
rs30885415	1	136284241	5.09807e-09	MIP-1b	pmid26694027	pg/ml	NULL
rs30886037	1	136295203	5.09807e-09	MIP-1b	pmid26694027	pg/ml	NULL
rs30886433	1	136074903	5.09807e-09	MIP-1b	pmid26694027	pg/ml	NULL
rs30886550	1	136323658	2.42738e-09	MIP-1b	pmid26694027	pg/ml	NULL
rs30887479	1	136322794	5.09807e-09	MIP-1b	pmid26694027	pg/ml	NULL
rs30887604	1	136113171	1.16715e-08	MIP-1b	pmid26694027	pg/ml	NULL
rs30887604	1	136113171	7.11571e-07	fat mass	pmid26694027	g	NULL
rs30887763	1	151239331	1.96966e-07	IL-1b	pmid26694027	pg/ml	NULL
rs30887763	1	151239331	4.62825e-07	TNFa	pmid26694027	pg/ml	NULL
rs30888012	1	136292267	5.09807e-09	MIP-1b	pmid26694027	pg/ml	NULL
rs30888049	1	136138995	5.09807e-09	MIP-1b	pmid26694027	pg/ml	NULL
rs30888050	1	136138959	5.88354e-12	MIP-1b	pmid26694027	pg/ml	NULL
rs30888101	1	136279906	5.09807e-09	MIP-1b	pmid26694027	pg/ml	NULL
rs30888104	1	136148275	5.09807e-09	MIP-1b	pmid26694027	pg/ml	NULL
rs30888475	1	136163466	5.09807e-09	MIP-1b	pmid26694027	pg/ml	NULL
rs30888481	1	136163185	5.09807e-09	MIP-1b	pmid26694027	pg/ml	NULL
rs30888482	1	136163156	5.09807e-09	MIP-1b	pmid26694027	pg/ml	NULL
rs30889113	1	136241629	1.12066e-09	MIP-1b	pmid26694027	pg/ml	NULL
rs30889294	1	136163059	2.09599e-09	MIP-1b	pmid26694027	pg/ml	NULL
rs30890935	1	136106722	5.88354e-12	MIP-1b	pmid26694027	pg/ml	NULL
rs30890995	1	136134074	5.88354e-12	MIP-1b	pmid26694027	pg/ml	NULL
rs30891680	1	136200579	5.09807e-09	MIP-1b	pmid26694027	pg/ml	NULL
rs30892075	1	136070498	6.47632e-12	MIP-1b	pmid26694027	pg/ml	NULL
rs30892505	1	136028093	5.09807e-09	MIP-1b	pmid26694027	pg/ml	NULL
rs30893026	1	136069968	5.09807e-09	MIP-1b	pmid26694027	pg/ml	NULL
rs30893419	1	135985522	6.09016e-08	MIP-1b	pmid26694027	pg/ml	NULL
rs30894127	1	136043235	9.51037e-12	MIP-1b	pmid26694027	pg/ml	NULL
rs30895031	1	136042714	5.88354e-12	MIP-1b	pmid26694027	pg/ml	NULL
rs30896388	1	136002034	3.5628e-08	MIP-1b	pmid26694027	pg/ml	NULL
rs30896444	1	179034996	6.69691e-08	Food Intake - Day 1	pmid25651185	g	NULL
rs30896444	1	179034996	2.45203e-09	Food Intake AVG - 4 Wks Diet	pmid25651185	g	NULL
rs30896644	1	172823865	4.31222e-08	Food Intake AVG - 4 Wks Diet	pmid25651185	g	NULL
rs30896699	1	136040387	5.09807e-09	MIP-1b	pmid26694027	pg/ml	NULL
rs30896702	1	136040214	1.87698e-09	MIP-1b	pmid26694027	pg/ml	NULL
rs30896703	1	136040194	1.87698e-09	MIP-1b	pmid26694027	pg/ml	NULL
rs30897304	1	136001694	5.8249e-08	MIP-1b	pmid26694027	pg/ml	NULL
rs30897383	1	136020793	5.09807e-09	MIP-1b	pmid26694027	pg/ml	NULL
rs30897596	1	136039900	5.09807e-09	MIP-1b	pmid26694027	pg/ml	NULL
rs30898397	1	136029319	9.84777e-08	MIP-1b	pmid26694027	pg/ml	NULL
rs30898755	1	135980102	6.46487e-10	MIP-1b	pmid26694027	pg/ml	NULL
rs30899534	1	135990012	6.09016e-08	MIP-1b	pmid26694027	pg/ml	NULL
rs30899537	1	135989843	6.09016e-08	MIP-1b	pmid26694027	pg/ml	NULL
rs30904839	1	178465713	7.97249e-08	Food Intake - Day 1	pmid25651185	g	NULL
rs30904839	1	178465713	1.12283e-08	Food Intake AVG - 4 Wks Diet	pmid25651185	g	NULL
rs30904841	1	175574343	8.77482e-07	Food Intake - Day 1	pmid25651185	g	NULL
rs30908670	1	135957598	6.46487e-10	MIP-1b	pmid26694027	pg/ml	NULL
rs30908996	1	169279246	9.07786e-08	HDL	pmid20054062	mg/dl	NULL
rs30910196	1	135955967	6.46487e-10	MIP-1b	pmid26694027	pg/ml	NULL
rs30910197	1	135955688	6.46487e-10	MIP-1b	pmid26694027	pg/ml	NULL
rs30911062	1	135954235	6.46487e-10	MIP-1b	pmid26694027	pg/ml	NULL
rs30912234	1	135911278	5.8249e-08	MIP-1b	pmid26694027	pg/ml	NULL
rs30913396	1	135951762	6.46487e-10	MIP-1b	pmid26694027	pg/ml	NULL
rs30914710	1	135907260	6.09016e-08	MIP-1b	pmid26694027	pg/ml	NULL
rs30915904	1	182374698	8.74093e-07	Food Intake AVG - 4 Wks Diet	pmid25651185	g	NULL
rs30918934	1	135903758	6.09016e-08	MIP-1b	pmid26694027	pg/ml	NULL
rs30919789	1	135902617	5.8249e-08	MIP-1b	pmid26694027	pg/ml	NULL
rs30926194	1	135883165	6.09016e-08	MIP-1b	pmid26694027	pg/ml	NULL
rs30938392	1	172681389	7.80679e-07	Food Intake AVG - 4 Wks Diet	pmid25651185	g	NULL
rs30947514	1	180555767	2.48651e-09	Food Intake - Day 1	pmid25651185	g	NULL
rs30947514	1	180555767	1.43816e-07	BF	pmid25651185	%	(final % - initial %) / initial %
rs30947514	1	180555767	7.1111e-10	Food Intake AVG - 4 Wks Diet	pmid25651185	g	NULL
rs30953952	1	174981953	9.65773e-10	KC	pmid26694027	pg/ml	NULL
rs30953952	1	174981953	5.6022e-07	Food Intake - Day 3	pmid25651185	g	NULL
rs30959330	1	185316538	6.74049e-07	total cholesterol	pmid25480693	mg/dl	total cholesterol
rs30978259	1	143659630	4.08329e-08	IL-1b	pmid26694027	pg/ml	NULL
rs30978259	1	143659630	3.47372e-07	TNFa	pmid26694027	pg/ml	NULL
rs30978290	1	143601639	3.99067e-08	IL-1b	pmid26694027	pg/ml	NULL
rs30978290	1	143601639	3.50137e-07	TNFa	pmid26694027	pg/ml	NULL
rs30980735	1	143612097	3.99067e-08	IL-1b	pmid26694027	pg/ml	NULL
rs30980735	1	143612097	3.50137e-07	TNFa	pmid26694027	pg/ml	NULL
rs30995950	1	174975782	9.65773e-10	KC	pmid26694027	pg/ml	NULL
rs30995950	1	174975782	5.6022e-07	Food Intake - Day 3	pmid25651185	g	NULL
rs30997206	1	179355467	5.99836e-09	Food Intake - Day 1	pmid25651185	g	NULL
rs30997206	1	179355467	6.64686e-10	Food Intake AVG - 4 Wks Diet	pmid25651185	g	NULL
rs31003892	1	177510686	2.7963e-09	Food Intake - Day 1	pmid25651185	g	NULL
rs31003892	1	177510686	3.03001e-10	Food Intake AVG - 4 Wks Diet	pmid25651185	g	NULL
rs31005996	1	136638105	7.77707e-09	MIP-1b	pmid26694027	pg/ml	NULL
rs31008509	1	172576873	5.21609e-07	Food Intake - Day 1	pmid25651185	g	NULL
rs31008509	1	172576873	6.55066e-08	Food Intake AVG - 4 Wks Diet	pmid25651185	g	NULL
rs31011079	1	178954553	4.56009e-09	Food Intake - Day 1	pmid25651185	g	NULL
rs31011079	1	178954553	2.92488e-10	Food Intake AVG - 4 Wks Diet	pmid25651185	g	NULL
rs31011168	1	178845654	2.16469e-07	Food Intake - Day 1	pmid25651185	g	NULL
rs31011168	1	178845654	2.92177e-08	Food Intake AVG - 4 Wks Diet	pmid25651185	g	NULL
rs31013124	1	179345247	7.88664e-08	Food Intake - Day 1	pmid25651185	g	NULL
rs31013124	1	179345247	5.78466e-09	Food Intake AVG - 4 Wks Diet	pmid25651185	g	NULL
rs31020203	1	176453315	2.84089e-07	Food Intake - Day 1	pmid25651185	g	NULL
rs31020203	1	176453315	8.48877e-07	Food Intake AVG - 4 Wks Diet	pmid25651185	g	NULL
rs31026479	1	181604370	2.48651e-09	Food Intake - Day 1	pmid25651185	g	NULL
rs31026479	1	181604370	1.43816e-07	BF	pmid25651185	%	(final % - initial %) / initial %
rs31026479	1	181604370	7.1111e-10	Food Intake AVG - 4 Wks Diet	pmid25651185	g	NULL
rs31027761	1	173370918	2.32466e-09	KC	pmid26694027	pg/ml	NULL
rs31042676	1	177131372	2.18383e-08	Food Intake - Day 1	pmid25651185	g	NULL
rs31042676	1	177131372	4.99089e-10	Food Intake AVG - 4 Wks Diet	pmid25651185	g	NULL
rs31042984	1	175609773	9.82044e-07	Insulin pg/ml	pmid25651185	pg/ml	NULL
rs31049852	1	178330570	2.67484e-07	Food Intake - Day 1	pmid25651185	g	NULL
rs31049852	1	178330570	2.2606e-08	Food Intake AVG - 4 Wks Diet	pmid25651185	g	NULL
rs31050578	1	172742334	7.09656e-07	Food Intake AVG - 4 Wks Diet	pmid25651185	g	NULL
rs31050768	1	177082062	1.168e-07	Food Intake AVG - 4 Wks Diet	pmid25651185	g	NULL
rs31061130	1	180107925	6.55069e-07	Food Intake - Day 3	pmid25651185	g	NULL
rs31061390	1	179291682	5.43105e-08	Food Intake - Day 1	pmid25651185	g	NULL
rs31061390	1	179291682	1.25981e-09	Food Intake AVG - 4 Wks Diet	pmid25651185	g	NULL
rs31079912	1	151074668	9.49658e-07	MIP-1b	pmid26694027	pg/ml	NULL
rs31091308	1	177018401	5.19058e-08	Food Intake - Day 1	pmid25651185	g	NULL
rs31091308	1	177018401	4.7548e-10	Food Intake AVG - 4 Wks Diet	pmid25651185	g	NULL
rs31097820	1	176506593	4.38832e-07	HDL	pmid20054062	mg/dl	NULL
rs31099320	1	180858241	3.77309e-08	Food Intake - Day 1	pmid25651185	g	NULL
rs31099320	1	180858241	9.01441e-07	BF	pmid25651185	%	(final % - initial %) / initial %
rs31099320	1	180858241	2.58506e-09	Food Intake AVG - 4 Wks Diet	pmid25651185	g	NULL
rs31104227	1	176067985	8.34857e-09	Food Intake AVG - 4 Wks Diet	pmid25651185	g	NULL
rs31106339	1	172700598	8.1842e-07	Food Intake AVG - 4 Wks Diet	pmid25651185	g	NULL
rs31108087	1	179865143	8.03825e-07	Food Intake - Day 3	pmid25651185	g	NULL
rs31109591	1	179757518	1.64214e-07	Food Intake - Day 1	pmid25651185	g	NULL
rs31109591	1	179757518	1.14854e-08	Food Intake AVG - 4 Wks Diet	pmid25651185	g	NULL
rs31118905	1	151102927	9.49658e-07	MIP-1b	pmid26694027	pg/ml	NULL
rs31122273	1	151057456	9.49658e-07	MIP-1b	pmid26694027	pg/ml	NULL
rs31126627	1	178604833	3.85097e-08	Food Intake - Day 1	pmid25651185	g	NULL
rs31126627	1	178604833	2.22479e-09	Food Intake AVG - 4 Wks Diet	pmid25651185	g	NULL
rs31128494	1	181969054	7.68177e-09	Food Intake - Day 1	pmid25651185	g	NULL
rs31128494	1	181969054	9.23473e-08	BF	pmid25651185	%	(final % - initial %) / initial %
rs31128494	1	181969054	1.73387e-09	Food Intake AVG - 4 Wks Diet	pmid25651185	g	NULL
rs31133384	1	170481700	8.03525e-13	HDL	pmid20054062	mg/dl	NULL
rs31133384	1	170481700	4.8512e-11	total cholesterol	pmid20054062	mg/dl	NULL
rs31134944	1	168300699	7.69708e-11	total cholesterol	pmid20054062	mg/dl	NULL
rs31134944	1	168300699	2.62655e-12	HDL	pmid20054062	mg/dl	NULL
rs31138559	1	172827566	7.40991e-08	Food Intake - Day 1	pmid25651185	g	NULL
rs31138559	1	172827566	2.3302e-09	Food Intake AVG - 4 Wks Diet	pmid25651185	g	NULL
rs31142868	1	176185437	8.9367e-10	Food Intake AVG - 4 Wks Diet	pmid25651185	g	NULL
rs31147362	1	173009377	4.0092e-11	KC	pmid26694027	pg/ml	NULL
rs31154776	1	175529006	6.53154e-07	Food Intake - Day 1	pmid25651185	g	NULL
rs31184170	1	170032969	2.18418e-09	total cholesterol	pmid20054062	mg/dl	NULL
rs31184170	1	170032969	8.82863e-10	HDL	pmid20054062	mg/dl	NULL
rs31188514	1	172098237	2.83011e-07	KC	pmid26694027	pg/ml	NULL
rs31190870	1	175565246	8.77482e-07	Food Intake - Day 1	pmid25651185	g	NULL
rs31198905	1	177060036	8.7888e-09	Food Intake AVG - 4 Wks Diet	pmid25651185	g	NULL
rs31200644	1	176436975	1.98332e-07	Food Intake - Day 1	pmid25651185	g	NULL
rs31200644	1	176436975	2.18533e-09	Food Intake AVG - 4 Wks Diet	pmid25651185	g	NULL
rs31212232	1	174736134	3.90737e-08	Food Intake - Day 1	pmid25651185	g	NULL
rs31212232	1	174736134	9.94005e-10	Food Intake AVG - 4 Wks Diet	pmid25651185	g	NULL
rs31226107	1	175386877	8.0194e-09	KC	pmid26694027	pg/ml	NULL
rs31226107	1	175386877	2.53709e-07	Food Intake - Day 3	pmid25651185	g	NULL
rs31237385	1	176253319	2.20773e-08	Food Intake - Day 1	pmid25651185	g	NULL
rs31237385	1	176253319	1.24121e-07	Food Intake AVG - 4 Wks Diet	pmid25651185	g	NULL
rs31238969	1	177427577	5.22392e-08	Food Intake - Day 1	pmid25651185	g	NULL
rs31238969	1	177427577	2.7412e-09	Food Intake AVG - 4 Wks Diet	pmid25651185	g	NULL
rs31241992	1	182663894	4.68176e-07	Food Intake AVG - 4 Wks Diet	pmid25651185	g	NULL
rs31241992	1	182663894	2.26131e-07	Food Intake - Day 3	pmid25651185	g	NULL
rs31244210	1	170907256	2.81681e-07	HDL	pmid20054062	mg/dl	NULL
rs31244210	1	170907256	9.4651e-08	total cholesterol	pmid20054062	mg/dl	NULL
rs31246358	1	179940919	1.57486e-07	Food Intake - Day 1	pmid25651185	g	NULL
rs31246358	1	179940919	3.93572e-09	Food Intake AVG - 4 Wks Diet	pmid25651185	g	NULL
rs31246865	1	172154578	2.83011e-07	KC	pmid26694027	pg/ml	NULL
rs31252941	1	157149886	8.81853e-08	total cholesterol	pmid20054062	mg/dl	NULL
rs31252941	1	157149886	4.55291e-08	HDL	pmid20054062	mg/dl	NULL
rs31256027	1	174246095	3.70368e-10	KC	pmid26694027	pg/ml	NULL
rs31256027	1	174246095	6.71019e-07	Food Intake AVG - 4 Wks Diet	pmid25651185	g	NULL
rs31256027	1	174246095	1.62237e-07	Food Intake - Day 3	pmid25651185	g	NULL
rs31256769	1	178931280	1.28759e-09	Food Intake - Day 1	pmid25651185	g	NULL
rs31256769	1	178931280	2.75466e-10	Food Intake AVG - 4 Wks Diet	pmid25651185	g	NULL
rs31256804	1	180747922	2.77744e-08	Food Intake - Day 1	pmid25651185	g	NULL
rs31256804	1	180747922	3.45903e-07	BF	pmid25651185	%	(final % - initial %) / initial %
rs31256804	1	180747922	2.73841e-09	Food Intake AVG - 4 Wks Diet	pmid25651185	g	NULL
rs31277155	1	171342027	2.60591e-07	KC	pmid26694027	pg/ml	NULL
rs31281902	1	171948902	2.83011e-07	KC	pmid26694027	pg/ml	NULL
rs31282255	1	179922241	5.76405e-07	Food Intake AVG - 4 Wks Diet	pmid25651185	g	NULL
rs31282255	1	179922241	1.3014e-07	Food Intake - Day 3	pmid25651185	g	NULL
rs31282257	1	168208459	3.00889e-07	total cholesterol	pmid20054062	mg/dl	NULL
rs31282257	1	168208459	3.10365e-08	HDL	pmid20054062	mg/dl	NULL
rs31284903	1	174912821	2.5617e-10	KC	pmid26694027	pg/ml	NULL
rs31284903	1	174912821	7.84122e-07	Food Intake AVG - 4 Wks Diet	pmid25651185	g	NULL
rs31284903	1	174912821	5.6022e-07	Food Intake - Day 3	pmid25651185	g	NULL
rs31305671	1	175511362	7.84606e-07	Food Intake - Day 1	pmid25651185	g	NULL
rs31305671	1	175511362	2.98143e-08	Food Intake AVG - 4 Wks Diet	pmid25651185	g	NULL
rs31305925	1	136961248	6.30275e-07	MIP-1b	pmid26694027	pg/ml	NULL
rs31307163	1	179870692	9.87601e-07	Food Intake - Day 3	pmid25651185	g	NULL
rs31321209	1	178670369	1.75158e-08	Food Intake - Day 1	pmid25651185	g	NULL
rs31321209	1	178670369	3.57081e-09	Food Intake AVG - 4 Wks Diet	pmid25651185	g	NULL
rs31323907	1	178577297	3.85097e-08	Food Intake - Day 1	pmid25651185	g	NULL
rs31323907	1	178577297	2.22479e-09	Food Intake AVG - 4 Wks Diet	pmid25651185	g	NULL
rs31324082	1	173221381	6.22789e-07	Food Intake - Day 1	pmid25651185	g	NULL
rs31324082	1	173221381	3.08437e-08	Food Intake AVG - 4 Wks Diet	pmid25651185	g	NULL
rs31327967	1	177469980	5.09775e-07	Food Intake - Day 1	pmid25651185	g	NULL
rs31327967	1	177469980	1.5737e-08	Food Intake AVG - 4 Wks Diet	pmid25651185	g	NULL
rs31330923	1	179141127	2.65364e-08	Food Intake - Day 1	pmid25651185	g	NULL
rs31330923	1	179141127	6.14511e-10	Food Intake AVG - 4 Wks Diet	pmid25651185	g	NULL
rs31335056	1	175588034	6.53154e-07	Food Intake - Day 1	pmid25651185	g	NULL
rs31345220	1	168208117	4.61241e-07	total cholesterol	pmid20054062	mg/dl	NULL
rs31345220	1	168208117	1.11733e-08	HDL	pmid20054062	mg/dl	NULL
rs31350627	1	181952859	7.68177e-09	Food Intake - Day 1	pmid25651185	g	NULL
rs31350627	1	181952859	9.23473e-08	BF	pmid25651185	%	(final % - initial %) / initial %
rs31350627	1	181952859	1.73387e-09	Food Intake AVG - 4 Wks Diet	pmid25651185	g	NULL
rs31353696	1	161949496	1.2773e-07	HDL	pmid20054062	mg/dl	NULL
rs31353696	1	161949496	7.08161e-08	total cholesterol	pmid20054062	mg/dl	NULL
rs31354057	1	171360921	5.2329e-07	Food Intake - Day 1	pmid25651185	g	NULL
rs31354057	1	171360921	5.13491e-07	BF	pmid25651185	%	(final % - initial %) / initial %
rs31354057	1	171360921	1.02793e-09	Food Intake AVG - 4 Wks Diet	pmid25651185	g	NULL
rs31355809	1	181686768	3.76088e-09	Food Intake - Day 1	pmid25651185	g	NULL
rs31355809	1	181686768	4.05669e-07	BF	pmid25651185	%	(final % - initial %) / initial %
rs31355809	1	181686768	1.28711e-09	Food Intake AVG - 4 Wks Diet	pmid25651185	g	NULL
rs31372160	1	169097544	1.68748e-09	total cholesterol	pmid20054062	mg/dl	NULL
rs31372160	1	169097544	7.27166e-11	HDL	pmid20054062	mg/dl	NULL
rs31374404	1	179082155	7.87779e-08	Food Intake - Day 1	pmid25651185	g	NULL
rs31374404	1	179082155	1.19369e-09	Food Intake AVG - 4 Wks Diet	pmid25651185	g	NULL
rs31376864	1	177683886	2.7963e-09	Food Intake - Day 1	pmid25651185	g	NULL
rs31376864	1	177683886	3.03001e-10	Food Intake AVG - 4 Wks Diet	pmid25651185	g	NULL
rs31378749	1	172687457	4.20781e-07	KC	pmid26694027	pg/ml	NULL
rs31379016	1	136553642	1.02421e-10	MIP-1b	pmid26694027	pg/ml	NULL
rs31379067	1	171696174	2.83011e-07	KC	pmid26694027	pg/ml	NULL
rs31383342	1	176987535	5.89173e-07	Food Intake - Day 1	pmid25651185	g	NULL
rs31383342	1	176987535	1.25048e-09	Food Intake AVG - 4 Wks Diet	pmid25651185	g	NULL
rs31386725	1	178658283	4.15824e-09	Food Intake - Day 1	pmid25651185	g	NULL
rs31386725	1	178658283	3.50151e-10	Food Intake AVG - 4 Wks Diet	pmid25651185	g	NULL
rs31392168	1	181965037	7.68177e-09	Food Intake - Day 1	pmid25651185	g	NULL
rs31392168	1	181965037	9.23473e-08	BF	pmid25651185	%	(final % - initial %) / initial %
rs31392168	1	181965037	1.73387e-09	Food Intake AVG - 4 Wks Diet	pmid25651185	g	NULL
rs31392802	1	179169937	2.09849e-08	Food Intake - Day 1	pmid25651185	g	NULL
rs31392802	1	179169937	3.80464e-10	Food Intake AVG - 4 Wks Diet	pmid25651185	g	NULL
rs31393372	1	181723417	2.48651e-09	Food Intake - Day 1	pmid25651185	g	NULL
rs31393372	1	181723417	1.43816e-07	BF	pmid25651185	%	(final % - initial %) / initial %
rs31393372	1	181723417	7.1111e-10	Food Intake AVG - 4 Wks Diet	pmid25651185	g	NULL
rs31394472	1	168370644	4.18422e-08	total cholesterol	pmid20054062	mg/dl	NULL
rs31394472	1	168370644	1.97901e-09	HDL	pmid20054062	mg/dl	NULL
rs31395232	1	182302810	3.63536e-08	Food Intake - Day 1	pmid25651185	g	NULL
rs31395232	1	182302810	2.159e-07	BF	pmid25651185	%	(final % - initial %) / initial %
rs31395232	1	182302810	1.77366e-09	Food Intake AVG - 4 Wks Diet	pmid25651185	g	NULL
rs31397178	1	172893951	1.9563e-08	KC	pmid26694027	pg/ml	NULL
rs31400775	1	175374650	4.23459e-09	KC	pmid26694027	pg/ml	NULL
rs31405726	1	171370981	5.2329e-07	Food Intake - Day 1	pmid25651185	g	NULL
rs31405726	1	171370981	5.13491e-07	BF	pmid25651185	%	(final % - initial %) / initial %
rs31405726	1	171370981	1.02793e-09	Food Intake AVG - 4 Wks Diet	pmid25651185	g	NULL
rs31406626	1	176014035	3.70353e-07	Food Intake - Day 1	pmid25651185	g	NULL
rs31406626	1	176014035	2.92178e-09	Food Intake AVG - 4 Wks Diet	pmid25651185	g	NULL
rs31407615	1	136861306	3.20905e-07	MIP-1b	pmid26694027	pg/ml	NULL
rs31410999	1	176185175	3.30097e-09	Food Intake AVG - 4 Wks Diet	pmid25651185	g	NULL
rs31413830	1	171438247	2.83011e-07	KC	pmid26694027	pg/ml	NULL
rs31413926	1	168342112	4.18422e-08	total cholesterol	pmid20054062	mg/dl	NULL
rs31413926	1	168342112	1.97901e-09	HDL	pmid20054062	mg/dl	NULL
rs31414811	1	170511140	8.03525e-13	HDL	pmid20054062	mg/dl	NULL
rs31414811	1	170511140	4.8512e-11	total cholesterol	pmid20054062	mg/dl	NULL
rs31417526	1	168531961	4.69033e-07	total cholesterol	pmid20054062	mg/dl	NULL
rs31417526	1	168531961	3.42302e-07	HDL	pmid20054062	mg/dl	NULL
rs31417833	1	168301046	7.69708e-11	total cholesterol	pmid20054062	mg/dl	NULL
rs31417833	1	168301046	2.62655e-12	HDL	pmid20054062	mg/dl	NULL
rs31418818	1	168331780	3.00889e-07	total cholesterol	pmid20054062	mg/dl	NULL
rs31418818	1	168331780	3.10365e-08	HDL	pmid20054062	mg/dl	NULL
rs31419310	1	182052419	7.68177e-09	Food Intake - Day 1	pmid25651185	g	NULL
rs31419310	1	182052419	9.23473e-08	BF	pmid25651185	%	(final % - initial %) / initial %
rs31419310	1	182052419	1.73387e-09	Food Intake AVG - 4 Wks Diet	pmid25651185	g	NULL
rs31420586	1	168312371	5.59341e-11	total cholesterol	pmid20054062	mg/dl	NULL
rs31420586	1	168312371	6.4663e-13	HDL	pmid20054062	mg/dl	NULL
rs31421080	1	179030958	7.10581e-08	Food Intake - Day 1	pmid25651185	g	NULL
rs31421080	1	179030958	3.15468e-09	Food Intake AVG - 4 Wks Diet	pmid25651185	g	NULL
rs31422560	1	182040479	1.04008e-08	Food Intake - Day 1	pmid25651185	g	NULL
rs31422560	1	182040479	8.89527e-08	BF	pmid25651185	%	(final % - initial %) / initial %
rs31422560	1	182040479	1.82087e-09	Food Intake AVG - 4 Wks Diet	pmid25651185	g	NULL
rs31422803	1	171746038	2.83011e-07	KC	pmid26694027	pg/ml	NULL
rs31422920	1	168274718	1.50693e-10	total cholesterol	pmid20054062	mg/dl	NULL
rs31422920	1	168274718	4.85811e-13	HDL	pmid20054062	mg/dl	NULL
rs31423553	1	168187409	3.10365e-08	HDL	pmid20054062	mg/dl	NULL
rs31423553	1	168187409	3.00889e-07	total cholesterol	pmid20054062	mg/dl	NULL
rs31425342	1	168247908	4.44557e-07	total cholesterol	pmid20054062	mg/dl	NULL
rs31425342	1	168247908	3.4622e-08	HDL	pmid20054062	mg/dl	NULL
rs31425567	1	136552477	1.02421e-10	MIP-1b	pmid26694027	pg/ml	NULL
rs31425716	1	177122610	8.06924e-09	Food Intake - Day 1	pmid25651185	g	NULL
rs31425716	1	177122610	1.52466e-10	Food Intake AVG - 4 Wks Diet	pmid25651185	g	NULL
rs31425866	1	175997271	9.88302e-07	Food Intake - Day 1	pmid25651185	g	NULL
rs31426326	1	168271256	3.00889e-07	total cholesterol	pmid20054062	mg/dl	NULL
rs31426326	1	168271256	3.10365e-08	HDL	pmid20054062	mg/dl	NULL
rs31428963	1	168237331	4.18422e-08	total cholesterol	pmid20054062	mg/dl	NULL
rs31428963	1	168237331	1.97901e-09	HDL	pmid20054062	mg/dl	NULL
rs31429760	1	178325834	4.92909e-07	Food Intake AVG - 4 Wks Diet	pmid25651185	g	NULL
rs31431288	1	168205484	4.44557e-07	total cholesterol	pmid20054062	mg/dl	NULL
rs31431288	1	168205484	3.4622e-08	HDL	pmid20054062	mg/dl	NULL
rs31432795	1	168232715	3.00889e-07	total cholesterol	pmid20054062	mg/dl	NULL
rs31432795	1	168232715	3.10365e-08	HDL	pmid20054062	mg/dl	NULL
rs3143353	1	175920276	3.70376e-07	HDL	pmid20054062	mg/dl	NULL
rs3143400	1	175871230	2.8358e-09	KC	pmid26694027	pg/ml	NULL
rs3143400	1	175871230	3.46131e-07	Food Intake AVG - 4 Wks Diet	pmid25651185	g	NULL
rs3143400	1	175871230	1.73425e-07	Food Intake - Day 3	pmid25651185	g	NULL
rs3143403	1	175872154	2.8358e-09	KC	pmid26694027	pg/ml	NULL
rs3143403	1	175872154	4.38418e-07	Food Intake AVG - 4 Wks Diet	pmid25651185	g	NULL
rs3143403	1	175872154	2.76661e-07	Food Intake - Day 3	pmid25651185	g	NULL
rs3143424	1	175896721	5.27795e-07	HDL	pmid20054062	mg/dl	NULL
rs31437168	1	171833888	2.83011e-07	KC	pmid26694027	pg/ml	NULL
rs31441962	1	177012716	6.22138e-07	Food Intake - Day 1	pmid25651185	g	NULL
rs31441962	1	177012716	2.03591e-08	Food Intake AVG - 4 Wks Diet	pmid25651185	g	NULL
rs31443784	1	177023431	5.19058e-08	Food Intake - Day 1	pmid25651185	g	NULL
rs31443784	1	177023431	4.7548e-10	Food Intake AVG - 4 Wks Diet	pmid25651185	g	NULL
rs31443847	1	168162752	3.00889e-07	total cholesterol	pmid20054062	mg/dl	NULL
rs31443847	1	168162752	3.10365e-08	HDL	pmid20054062	mg/dl	NULL
rs31443850	1	168162610	3.00889e-07	total cholesterol	pmid20054062	mg/dl	NULL
rs31443850	1	168162610	3.10365e-08	HDL	pmid20054062	mg/dl	NULL
rs31447192	1	177284691	7.87013e-08	Food Intake - Day 1	pmid25651185	g	NULL
rs31447192	1	177284691	6.0418e-07	Food Intake AVG - 4 Wks Diet	pmid25651185	g	NULL
rs31450837	1	176056183	5.92372e-08	Food Intake - Day 1	pmid25651185	g	NULL
rs31450837	1	176056183	5.51814e-10	Food Intake AVG - 4 Wks Diet	pmid25651185	g	NULL
rs31451818	1	170440582	4.41058e-08	total cholesterol	pmid20054062	mg/dl	NULL
rs31451818	1	170440582	2.691e-10	HDL	pmid20054062	mg/dl	NULL
rs31451819	1	170440503	3.87645e-07	total cholesterol	pmid20054062	mg/dl	NULL
rs31451819	1	170440503	5.73952e-09	HDL	pmid20054062	mg/dl	NULL
rs31452862	1	179747822	3.03302e-07	Food Intake - Day 1	pmid25651185	g	NULL
rs31452862	1	179747822	7.39012e-09	Food Intake AVG - 4 Wks Diet	pmid25651185	g	NULL
rs31453524	1	180632413	7.43325e-07	Food Intake - Day 3	pmid25651185	g	NULL
rs31453525	1	180003292	6.66273e-07	Food Intake - Day 3	pmid25651185	g	NULL
rs31453586	1	170439026	3.87645e-07	total cholesterol	pmid20054062	mg/dl	NULL
rs31453586	1	170439026	5.73952e-09	HDL	pmid20054062	mg/dl	NULL
rs31454554	1	170388743	4.53094e-10	total cholesterol	pmid20054062	mg/dl	NULL
rs31454554	1	170388743	1.68068e-11	HDL	pmid20054062	mg/dl	NULL
rs31454555	1	170388705	4.8512e-11	total cholesterol	pmid20054062	mg/dl	NULL
rs31454555	1	170388705	8.03525e-13	HDL	pmid20054062	mg/dl	NULL
rs31455268	1	170387185	4.8512e-11	total cholesterol	pmid20054062	mg/dl	NULL
rs31455268	1	170387185	8.03525e-13	HDL	pmid20054062	mg/dl	NULL
rs31455770	1	170340768	3.37263e-07	total cholesterol	pmid20054062	mg/dl	NULL
rs31455770	1	170340768	1.50544e-08	HDL	pmid20054062	mg/dl	NULL
rs31458279	1	170321514	3.87645e-07	total cholesterol	pmid20054062	mg/dl	NULL
rs31458279	1	170321514	5.73952e-09	HDL	pmid20054062	mg/dl	NULL
rs31458281	1	170321399	3.87645e-07	total cholesterol	pmid20054062	mg/dl	NULL
rs31458281	1	170321399	5.73952e-09	HDL	pmid20054062	mg/dl	NULL
rs31458906	1	170246235	3.87645e-07	total cholesterol	pmid20054062	mg/dl	NULL
rs31458906	1	170246235	5.73952e-09	HDL	pmid20054062	mg/dl	NULL
rs31459357	1	170349319	3.87645e-07	total cholesterol	pmid20054062	mg/dl	NULL
rs31459357	1	170349319	5.73952e-09	HDL	pmid20054062	mg/dl	NULL
rs31460430	1	170318436	3.87645e-07	total cholesterol	pmid20054062	mg/dl	NULL
rs31460430	1	170318436	5.73952e-09	HDL	pmid20054062	mg/dl	NULL
rs31460725	1	170244715	3.87645e-07	total cholesterol	pmid20054062	mg/dl	NULL
rs31460725	1	170244715	5.73952e-09	HDL	pmid20054062	mg/dl	NULL
rs31462831	1	170291939	4.8512e-11	total cholesterol	pmid20054062	mg/dl	NULL
rs31462831	1	170291939	8.03525e-13	HDL	pmid20054062	mg/dl	NULL
rs31463582	1	170206428	2.18418e-09	total cholesterol	pmid20054062	mg/dl	NULL
rs31463582	1	170206428	8.82863e-10	HDL	pmid20054062	mg/dl	NULL
rs31465983	1	170283375	4.8512e-11	total cholesterol	pmid20054062	mg/dl	NULL
rs31465983	1	170283375	8.03525e-13	HDL	pmid20054062	mg/dl	NULL
rs31466317	1	170203955	2.18418e-09	total cholesterol	pmid20054062	mg/dl	NULL
rs31466317	1	170203955	8.82863e-10	HDL	pmid20054062	mg/dl	NULL
rs31466658	1	175768248	4.39494e-07	Food Intake - Day 2	pmid25651185	g	NULL
rs31466658	1	175768248	4.46329e-09	Food Intake AVG - 4 Wks Diet	pmid25651185	g	NULL
rs31466658	1	175768248	1.08955e-08	Food Intake - Day 3	pmid25651185	g	NULL
rs31468048	1	170187407	5.73952e-09	HDL	pmid20054062	mg/dl	NULL
rs31468048	1	170187407	3.87645e-07	total cholesterol	pmid20054062	mg/dl	NULL
rs31469147	1	170047226	4.06924e-09	total cholesterol	pmid20054062	mg/dl	NULL
rs31469147	1	170047226	6.56466e-10	HDL	pmid20054062	mg/dl	NULL
rs31469432	1	170079985	1.15216e-08	total cholesterol	pmid20054062	mg/dl	NULL
rs31469432	1	170079985	6.64378e-09	HDL	pmid20054062	mg/dl	NULL
rs31469598	1	170123339	2.18418e-09	total cholesterol	pmid20054062	mg/dl	NULL
rs31469598	1	170123339	8.82863e-10	HDL	pmid20054062	mg/dl	NULL
rs31470087	1	170079677	2.18418e-09	total cholesterol	pmid20054062	mg/dl	NULL
rs31470087	1	170079677	8.82863e-10	HDL	pmid20054062	mg/dl	NULL
rs31470282	1	170136223	2.18418e-09	total cholesterol	pmid20054062	mg/dl	NULL
rs31470282	1	170136223	8.82863e-10	HDL	pmid20054062	mg/dl	NULL
rs31471814	1	169995053	2.18418e-09	total cholesterol	pmid20054062	mg/dl	NULL
rs31471814	1	169995053	8.82863e-10	HDL	pmid20054062	mg/dl	NULL
rs31473421	1	135978841	6.09016e-08	MIP-1b	pmid26694027	pg/ml	NULL
rs31473560	1	169987853	2.18418e-09	total cholesterol	pmid20054062	mg/dl	NULL
rs31473560	1	169987853	8.82863e-10	HDL	pmid20054062	mg/dl	NULL
rs31474789	1	176854010	7.79137e-07	Food Intake - Day 1	pmid25651185	g	NULL
rs31474789	1	176854010	4.39776e-07	Food Intake AVG - 4 Wks Diet	pmid25651185	g	NULL
rs31474930	1	169390664	8.06831e-07	total cholesterol	pmid20054062	mg/dl	NULL
rs31474930	1	169390664	5.26184e-08	HDL	pmid20054062	mg/dl	NULL
rs31478469	1	173329248	1.24968e-07	HDL	pmid20054062	mg/dl	NULL
rs31478854	1	176565909	2.78028e-07	HDL	pmid20054062	mg/dl	NULL
rs31479305	1	181528723	9.29013e-08	BF	pmid25651185	%	(final % - initial %) / initial %
rs31479305	1	181528723	2.80342e-07	Food Intake AVG - 4 Wks Diet	pmid25651185	g	NULL
rs31485170	1	169841359	4.44918e-08	total cholesterol	pmid20054062	mg/dl	NULL
rs31485170	1	169841359	4.22216e-09	HDL	pmid20054062	mg/dl	NULL
rs31485244	1	133199431	8.03306e-09	Velocity of circumferential shortening (day 7)	pmid25480693	%/ms	Velocity of circumferential shortening
rs31485244	1	133199431	3.67427e-08	Mean normalized systolic ejection rate (day 7)	pmid25480693	%/ms	Mean normalized systolic ejection rate
rs3148602	1	175871285	5.27795e-07	HDL	pmid20054062	mg/dl	NULL
rs3148604	1	175871705	1.9032e-09	KC	pmid26694027	pg/ml	NULL
rs3148604	1	175871705	2.12008e-07	Food Intake AVG - 4 Wks Diet	pmid25651185	g	NULL
rs3148604	1	175871705	1.3275e-07	Food Intake - Day 3	pmid25651185	g	NULL
rs31486198	1	169920877	4.12939e-07	HDL	pmid20054062	mg/dl	NULL
rs3148629	1	175883291	5.27795e-07	HDL	pmid20054062	mg/dl	NULL
rs3148639	1	175902541	5.27795e-07	HDL	pmid20054062	mg/dl	NULL
rs3148640	1	175902605	5.27795e-07	HDL	pmid20054062	mg/dl	NULL
rs31486548	1	169904257	1.15216e-08	total cholesterol	pmid20054062	mg/dl	NULL
rs31486548	1	169904257	6.64378e-09	HDL	pmid20054062	mg/dl	NULL
rs31486549	1	169904172	2.18418e-09	total cholesterol	pmid20054062	mg/dl	NULL
rs31486549	1	169904172	8.82863e-10	HDL	pmid20054062	mg/dl	NULL
rs31487880	1	169834556	2.59933e-08	total cholesterol	pmid20054062	mg/dl	NULL
rs31487880	1	169834556	1.5743e-08	HDL	pmid20054062	mg/dl	NULL
rs31488008	1	169879252	3.87645e-07	total cholesterol	pmid20054062	mg/dl	NULL
rs31488008	1	169879252	5.73952e-09	HDL	pmid20054062	mg/dl	NULL
rs31488877	1	179141385	1.10509e-08	Food Intake - Day 1	pmid25651185	g	NULL
rs31488877	1	179141385	7.89211e-10	Food Intake AVG - 4 Wks Diet	pmid25651185	g	NULL
rs31490105	1	169803139	4.44918e-08	total cholesterol	pmid20054062	mg/dl	NULL
rs31490105	1	169803139	4.22216e-09	HDL	pmid20054062	mg/dl	NULL
rs31491360	1	169794508	4.44918e-08	total cholesterol	pmid20054062	mg/dl	NULL
rs31491360	1	169794508	4.22216e-09	HDL	pmid20054062	mg/dl	NULL
rs31492665	1	169873305	3.87645e-07	total cholesterol	pmid20054062	mg/dl	NULL
rs31492665	1	169873305	5.73952e-09	HDL	pmid20054062	mg/dl	NULL
rs31497158	1	169748887	4.44918e-08	total cholesterol	pmid20054062	mg/dl	NULL
rs31497158	1	169748887	4.22216e-09	HDL	pmid20054062	mg/dl	NULL
rs31498314	1	173316630	4.34375e-07	Food Intake AVG - 4 Wks Diet	pmid25651185	g	NULL
rs31499761	1	171849483	2.83011e-07	KC	pmid26694027	pg/ml	NULL
rs31500291	1	169687447	4.44918e-08	total cholesterol	pmid20054062	mg/dl	NULL
rs31500291	1	169687447	4.22216e-09	HDL	pmid20054062	mg/dl	NULL
rs31501066	1	180988783	2.54057e-09	Food Intake - Day 1	pmid25651185	g	NULL
rs31501066	1	180988783	1.4723e-07	BF	pmid25651185	%	(final % - initial %) / initial %
rs31501066	1	180988783	6.409e-10	Food Intake AVG - 4 Wks Diet	pmid25651185	g	NULL
rs31507136	1	171582944	2.83011e-07	KC	pmid26694027	pg/ml	NULL
rs31509865	1	169416072	5.73952e-09	HDL	pmid20054062	mg/dl	NULL
rs31509865	1	169416072	3.87645e-07	total cholesterol	pmid20054062	mg/dl	NULL
rs31513537	1	169441134	3.87645e-07	total cholesterol	pmid20054062	mg/dl	NULL
rs31513537	1	169441134	5.73952e-09	HDL	pmid20054062	mg/dl	NULL
rs31513542	1	169440457	3.87645e-07	total cholesterol	pmid20054062	mg/dl	NULL
rs31513542	1	169440457	5.73952e-09	HDL	pmid20054062	mg/dl	NULL
rs31517246	1	179215215	1.49539e-08	Food Intake - Day 1	pmid25651185	g	NULL
rs31517246	1	179215215	1.29075e-09	Food Intake AVG - 4 Wks Diet	pmid25651185	g	NULL
rs31517386	1	169417275	3.87645e-07	total cholesterol	pmid20054062	mg/dl	NULL
rs31517386	1	169417275	5.73952e-09	HDL	pmid20054062	mg/dl	NULL
rs31518973	1	176612871	1.10328e-08	Food Intake AVG - 4 Wks Diet	pmid25651185	g	NULL
rs31519644	1	172957630	4.0092e-11	KC	pmid26694027	pg/ml	NULL
rs31520950	1	179912991	7.49764e-07	Food Intake - Day 3	pmid25651185	g	NULL
rs31526492	1	171991896	2.83011e-07	KC	pmid26694027	pg/ml	NULL
rs31527501	1	182940059	8.17381e-07	Food Intake AVG - 4 Wks Diet	pmid25651185	g	NULL
rs31528060	1	171983630	2.83011e-07	KC	pmid26694027	pg/ml	NULL
rs31528917	1	171816395	6.29688e-07	KC	pmid26694027	pg/ml	NULL
rs31529171	1	171664326	2.83011e-07	KC	pmid26694027	pg/ml	NULL
rs31529600	1	176826202	7.79137e-07	Food Intake - Day 1	pmid25651185	g	NULL
rs31529600	1	176826202	4.39776e-07	Food Intake AVG - 4 Wks Diet	pmid25651185	g	NULL
rs31529714	1	171849583	1.42216e-07	KC	pmid26694027	pg/ml	NULL
rs31529847	1	171802791	4.18996e-07	Food Intake - Day 1	pmid25651185	g	NULL
rs31529847	1	171802791	2.3863e-07	BF	pmid25651185	%	(final % - initial %) / initial %
rs31529847	1	171802791	2.08863e-09	Food Intake AVG - 4 Wks Diet	pmid25651185	g	NULL
rs31530225	1	171751194	2.83011e-07	KC	pmid26694027	pg/ml	NULL
rs31530267	1	171696682	2.83011e-07	KC	pmid26694027	pg/ml	NULL
rs31530270	1	171696579	2.83011e-07	KC	pmid26694027	pg/ml	NULL
rs31530725	1	171847215	1.42216e-07	KC	pmid26694027	pg/ml	NULL
rs31530730	1	171845877	2.83011e-07	KC	pmid26694027	pg/ml	NULL
rs31530732	1	171845606	2.83011e-07	KC	pmid26694027	pg/ml	NULL
rs31532197	1	171949428	2.83011e-07	KC	pmid26694027	pg/ml	NULL
rs31532480	1	171684529	2.83011e-07	KC	pmid26694027	pg/ml	NULL
rs31533041	1	171733889	9.22404e-07	BF	pmid25651185	%	(final % - initial %) / initial %
rs31533041	1	171733889	2.01725e-07	Food Intake AVG - 4 Wks Diet	pmid25651185	g	NULL
rs31533974	1	136410637	5.09807e-09	MIP-1b	pmid26694027	pg/ml	NULL
rs31534356	1	171762838	9.22404e-07	BF	pmid25651185	%	(final % - initial %) / initial %
rs31534356	1	171762838	2.01725e-07	Food Intake AVG - 4 Wks Diet	pmid25651185	g	NULL
rs31535302	1	171490357	2.83011e-07	KC	pmid26694027	pg/ml	NULL
rs31536084	1	171576905	2.83011e-07	KC	pmid26694027	pg/ml	NULL
rs31536376	1	171704576	3.98147e-07	Food Intake AVG - 4 Wks Diet	pmid25651185	g	NULL
rs31536633	1	171589634	2.83011e-07	KC	pmid26694027	pg/ml	NULL
rs31537454	1	171589271	2.83011e-07	KC	pmid26694027	pg/ml	NULL
rs31537962	1	171527620	2.74826e-07	KC	pmid26694027	pg/ml	NULL
rs31538639	1	171251921	2.99041e-07	HDL	pmid20054062	mg/dl	NULL
rs31539537	1	171582972	4.5535e-07	KC	pmid26694027	pg/ml	NULL
rs31539991	1	171438378	2.83011e-07	KC	pmid26694027	pg/ml	NULL
rs31540911	1	171435646	1.43341e-08	total cholesterol	pmid20054062	mg/dl	NULL
rs31540911	1	171435646	8.4342e-10	HDL	pmid20054062	mg/dl	NULL
rs31541046	1	171418823	7.74389e-07	HDL	pmid20054062	mg/dl	NULL
rs31542354	1	171431737	2.83011e-07	KC	pmid26694027	pg/ml	NULL
rs31543162	1	171414494	6.53236e-11	total cholesterol	pmid20054062	mg/dl	NULL
rs31543162	1	171414494	6.20005e-12	HDL	pmid20054062	mg/dl	NULL
rs31544157	1	171269985	2.60591e-07	KC	pmid26694027	pg/ml	NULL
rs31546430	1	177644658	2.7963e-09	Food Intake - Day 1	pmid25651185	g	NULL
rs31546430	1	177644658	3.03001e-10	Food Intake AVG - 4 Wks Diet	pmid25651185	g	NULL
rs31546960	1	173346309	4.0092e-11	KC	pmid26694027	pg/ml	NULL
rs31547121	1	177335446	3.72358e-07	Food Intake - Day 1	pmid25651185	g	NULL
rs31547121	1	177335446	6.89375e-07	Food Intake AVG - 4 Wks Diet	pmid25651185	g	NULL
rs31547745	1	171397409	4.18996e-07	Food Intake - Day 1	pmid25651185	g	NULL
rs31547745	1	171397409	2.3863e-07	BF	pmid25651185	%	(final % - initial %) / initial %
rs31547745	1	171397409	2.08863e-09	Food Intake AVG - 4 Wks Diet	pmid25651185	g	NULL
rs31548337	1	171334625	2.60591e-07	KC	pmid26694027	pg/ml	NULL
rs31549084	1	171376218	5.70199e-07	Food Intake - Day 1	pmid25651185	g	NULL
rs31549084	1	171376218	5.50451e-09	Food Intake AVG - 4 Wks Diet	pmid25651185	g	NULL
rs31549266	1	171318820	5.48994e-08	KC	pmid26694027	pg/ml	NULL
rs31549934	1	179081741	1.5476e-07	Food Intake - Day 1	pmid25651185	g	NULL
rs31549934	1	179081741	9.31494e-09	Food Intake AVG - 4 Wks Diet	pmid25651185	g	NULL
rs31551026	1	171350073	2.60591e-07	KC	pmid26694027	pg/ml	NULL
rs31551208	1	171297915	2.60591e-07	KC	pmid26694027	pg/ml	NULL
rs31551428	1	171369609	2.60591e-07	KC	pmid26694027	pg/ml	NULL
rs31551612	1	171208377	1.5361e-14	total cholesterol	pmid20054062	mg/dl	NULL
rs31551612	1	171208377	2.67648e-08	unesterified cholesterol	pmid20054062	mg/dl	NULL
rs31551612	1	171208377	7.65691e-17	HDL	pmid20054062	mg/dl	NULL
rs31551612	1	171208377	2.51269e-07	HDL	pmid25480693	mg/dl	HDL
rs31552355	1	171189810	4.18996e-07	Food Intake - Day 1	pmid25651185	g	NULL
rs31552355	1	171189810	2.3863e-07	BF	pmid25651185	%	(final % - initial %) / initial %
rs31552355	1	171189810	2.08863e-09	Food Intake AVG - 4 Wks Diet	pmid25651185	g	NULL
rs31552666	1	171387257	2.83011e-07	KC	pmid26694027	pg/ml	NULL
rs31552906	1	171292590	3.95377e-07	Food Intake - Day 1	pmid25651185	g	NULL
rs31552906	1	171292590	9.46224e-07	BF	pmid25651185	%	(final % - initial %) / initial %
rs31552906	1	171292590	2.15712e-09	Food Intake AVG - 4 Wks Diet	pmid25651185	g	NULL
rs31553413	1	176563915	8.10644e-07	total cholesterol	pmid20054062	mg/dl	NULL
rs31553413	1	176563915	5.29938e-08	HDL	pmid20054062	mg/dl	NULL
rs31553456	1	176253262	6.4382e-07	Food Intake - Day 1	pmid25651185	g	NULL
rs31553456	1	176253262	7.33551e-07	Food Intake AVG - 4 Wks Diet	pmid25651185	g	NULL
rs31553686	1	171290106	3.77321e-07	Food Intake - Day 1	pmid25651185	g	NULL
rs31553686	1	171290106	7.57003e-07	BF	pmid25651185	%	(final % - initial %) / initial %
rs31553686	1	171290106	1.47384e-09	Food Intake AVG - 4 Wks Diet	pmid25651185	g	NULL
rs31554176	1	171384403	4.18996e-07	Food Intake - Day 1	pmid25651185	g	NULL
rs31554176	1	171384403	2.3863e-07	BF	pmid25651185	%	(final % - initial %) / initial %
rs31554176	1	171384403	2.08863e-09	Food Intake AVG - 4 Wks Diet	pmid25651185	g	NULL
rs31554178	1	171384101	2.83011e-07	KC	pmid26694027	pg/ml	NULL
rs31555835	1	172687914	2.24984e-08	KC	pmid26694027	pg/ml	NULL
rs31556211	1	172221577	7.94533e-07	Insulin pg/ml	pmid25651185	pg/ml	NULL
rs31556224	1	171195207	6.47493e-07	Food Intake - Day 1	pmid25651185	g	NULL
rs31556224	1	171195207	3.23268e-07	BF	pmid25651185	%	(final % - initial %) / initial %
rs31556224	1	171195207	7.81474e-09	Food Intake AVG - 4 Wks Diet	pmid25651185	g	NULL
rs31556443	1	172582700	2.24984e-08	KC	pmid26694027	pg/ml	NULL
rs31557046	1	172637826	3.23868e-07	Food Intake AVG - 4 Wks Diet	pmid25651185	g	NULL
rs31557294	1	172680923	2.24984e-08	KC	pmid26694027	pg/ml	NULL
rs31557360	1	172560458	1.14413e-08	Food Intake AVG - 4 Wks Diet	pmid25651185	g	NULL
rs31557388	1	171193136	1.16938e-09	total cholesterol	pmid20054062	mg/dl	NULL
rs31557388	1	171193136	5.43753e-11	HDL	pmid20054062	mg/dl	NULL
rs31557633	1	172433015	5.90918e-09	HDL	pmid20054062	mg/dl	NULL
rs31557633	1	172433015	1.77529e-07	total cholesterol	pmid20054062	mg/dl	NULL
rs31557936	1	172707310	8.1842e-07	Food Intake AVG - 4 Wks Diet	pmid25651185	g	NULL
rs31557939	1	172706981	2.24984e-08	KC	pmid26694027	pg/ml	NULL
rs31557971	1	172491348	1.01949e-07	Food Intake - Day 1	pmid25651185	g	NULL
rs31557971	1	172491348	5.46021e-10	Food Intake AVG - 4 Wks Diet	pmid25651185	g	NULL
rs31557972	1	172490225	2.63237e-08	KC	pmid26694027	pg/ml	NULL
rs31558437	1	172663897	4.59222e-08	KC	pmid26694027	pg/ml	NULL
rs31558438	1	172663616	2.24984e-08	KC	pmid26694027	pg/ml	NULL
rs31558475	1	172580781	2.51596e-07	KC	pmid26694027	pg/ml	NULL
rs31558945	1	172489471	3.1756e-08	KC	pmid26694027	pg/ml	NULL
rs31559236	1	172429451	9.92487e-07	Food Intake - Day 3	pmid25651185	g	NULL
rs31559395	1	172530124	6.05377e-08	KC	pmid26694027	pg/ml	NULL
rs31559537	1	172624575	2.24984e-08	KC	pmid26694027	pg/ml	NULL
rs31559539	1	172623365	4.20781e-07	KC	pmid26694027	pg/ml	NULL
rs31559539	1	172623365	7.97011e-07	Food Intake - Day 3	pmid25651185	g	NULL
rs31560251	1	172576522	4.20781e-07	KC	pmid26694027	pg/ml	NULL
rs31560251	1	172576522	7.97011e-07	Food Intake - Day 3	pmid25651185	g	NULL
rs31560405	1	172487253	2.41957e-07	KC	pmid26694027	pg/ml	NULL
rs31560464	1	172448250	2.64348e-07	KC	pmid26694027	pg/ml	NULL
rs31561281	1	172444585	2.64348e-07	KC	pmid26694027	pg/ml	NULL
rs31562098	1	172443527	2.64348e-07	KC	pmid26694027	pg/ml	NULL
rs31562315	1	172603177	2.24984e-08	KC	pmid26694027	pg/ml	NULL
rs31562649	1	172538781	2.24984e-08	KC	pmid26694027	pg/ml	NULL
rs31562776	1	172381513	2.64348e-07	KC	pmid26694027	pg/ml	NULL
rs31563152	1	172568942	1.14413e-08	Food Intake AVG - 4 Wks Diet	pmid25651185	g	NULL
rs31564574	1	179771691	1.64214e-07	Food Intake - Day 1	pmid25651185	g	NULL
rs31564574	1	179771691	1.14854e-08	Food Intake AVG - 4 Wks Diet	pmid25651185	g	NULL
rs31564910	1	172328750	1.51298e-07	KC	pmid26694027	pg/ml	NULL
rs31565007	1	172508661	9.51716e-07	total cholesterol	pmid20054062	mg/dl	NULL
rs31565246	1	172291283	1.24968e-07	HDL	pmid20054062	mg/dl	NULL
rs31565666	1	172328115	2.88715e-07	KC	pmid26694027	pg/ml	NULL
rs31566066	1	172290559	2.64348e-07	KC	pmid26694027	pg/ml	NULL
rs31566070	1	172290367	4.01584e-07	KC	pmid26694027	pg/ml	NULL
rs31567226	1	136680909	1.55062e-07	MIP-1b	pmid26694027	pg/ml	NULL
rs31568157	1	172322660	1.51298e-07	KC	pmid26694027	pg/ml	NULL
rs31568401	1	171006105	5.22667e-08	total cholesterol	pmid20054062	mg/dl	NULL
rs31568401	1	171006105	1.06715e-09	HDL	pmid20054062	mg/dl	NULL
rs31569690	1	172231360	9.33915e-07	Food Intake - Day 3	pmid25651185	g	NULL
rs31571258	1	176050478	4.06552e-08	Food Intake - Day 1	pmid25651185	g	NULL
rs31571258	1	176050478	4.30684e-10	Food Intake AVG - 4 Wks Diet	pmid25651185	g	NULL
rs31572184	1	172293063	2.64348e-07	KC	pmid26694027	pg/ml	NULL
rs31572828	1	172235364	4.28884e-07	KC	pmid26694027	pg/ml	NULL
rs31574880	1	172220439	2.64348e-07	KC	pmid26694027	pg/ml	NULL
rs31575637	1	172219532	7.86182e-07	Food Intake AVG - 4 Wks Diet	pmid25651185	g	NULL
rs31576681	1	172138234	2.83011e-07	KC	pmid26694027	pg/ml	NULL
rs31576916	1	172091334	2.83011e-07	KC	pmid26694027	pg/ml	NULL
rs31577079	1	176685169	2.98123e-08	Food Intake AVG - 4 Wks Diet	pmid25651185	g	NULL
rs31577632	1	172113899	4.219e-07	KC	pmid26694027	pg/ml	NULL
rs31577638	1	172160885	2.83011e-07	KC	pmid26694027	pg/ml	NULL
rs31579146	1	172098365	2.83011e-07	KC	pmid26694027	pg/ml	NULL
rs31580052	1	177665510	5.55967e-08	Food Intake - Day 1	pmid25651185	g	NULL
rs31580052	1	177665510	7.7398e-09	Food Intake AVG - 4 Wks Diet	pmid25651185	g	NULL
rs31580807	1	172065168	2.83011e-07	KC	pmid26694027	pg/ml	NULL
rs31581532	1	173737466	2.62434e-07	Food Intake AVG - 4 Wks Diet	pmid25651185	g	NULL
rs31582680	1	172060216	2.83011e-07	KC	pmid26694027	pg/ml	NULL
rs31584268	1	173714321	1.53596e-07	Food Intake AVG - 4 Wks Diet	pmid25651185	g	NULL
rs31584856	1	173679184	3.38107e-12	KC	pmid26694027	pg/ml	NULL
rs31584856	1	173679184	7.44299e-07	Food Intake - Day 3	pmid25651185	g	NULL
rs31585096	1	173743163	4.39511e-07	Food Intake - Day 1	pmid25651185	g	NULL
rs31585096	1	173743163	1.95372e-08	Food Intake AVG - 4 Wks Diet	pmid25651185	g	NULL
rs31587587	1	173645553	3.92234e-11	KC	pmid26694027	pg/ml	NULL
rs31588576	1	173593258	4.3092e-08	Food Intake AVG - 4 Wks Diet	pmid25651185	g	NULL
rs31589290	1	178800587	1.52048e-09	Food Intake - Day 1	pmid25651185	g	NULL
rs31589290	1	178800587	3.28357e-10	Food Intake AVG - 4 Wks Diet	pmid25651185	g	NULL
rs31589644	1	173636326	4.3092e-08	Food Intake AVG - 4 Wks Diet	pmid25651185	g	NULL
rs31590877	1	175794941	5.79204e-09	KC	pmid26694027	pg/ml	NULL
rs31590877	1	175794941	4.56777e-07	Food Intake AVG - 4 Wks Diet	pmid25651185	g	NULL
rs31590877	1	175794941	2.46865e-07	Food Intake - Day 3	pmid25651185	g	NULL
rs31593729	1	180470785	4.32844e-08	Food Intake - Day 1	pmid25651185	g	NULL
rs31593729	1	180470785	3.06852e-07	BF	pmid25651185	%	(final % - initial %) / initial %
rs31593729	1	180470785	7.96203e-09	Food Intake AVG - 4 Wks Diet	pmid25651185	g	NULL
rs31595681	1	180559927	2.48651e-09	Food Intake - Day 1	pmid25651185	g	NULL
rs31595681	1	180559927	1.43816e-07	BF	pmid25651185	%	(final % - initial %) / initial %
rs31595681	1	180559927	7.1111e-10	Food Intake AVG - 4 Wks Diet	pmid25651185	g	NULL
rs31596985	1	177017462	5.19058e-08	Food Intake - Day 1	pmid25651185	g	NULL
rs31596985	1	177017462	4.7548e-10	Food Intake AVG - 4 Wks Diet	pmid25651185	g	NULL
rs31601949	1	181327887	1.30603e-08	Food Intake - Day 1	pmid25651185	g	NULL
rs31601949	1	181327887	1.27058e-07	BF	pmid25651185	%	(final % - initial %) / initial %
rs31601949	1	181327887	1.83253e-09	Food Intake AVG - 4 Wks Diet	pmid25651185	g	NULL
rs31604245	1	173457503	3.38107e-12	KC	pmid26694027	pg/ml	NULL
rs31604246	1	173457382	2.31838e-11	KC	pmid26694027	pg/ml	NULL
rs31604246	1	173457382	7.37969e-07	Food Intake - Day 3	pmid25651185	g	NULL
rs31605073	1	173486559	1.35831e-11	KC	pmid26694027	pg/ml	NULL
rs31605177	1	172098989	3.27704e-07	KC	pmid26694027	pg/ml	NULL
rs31605516	1	173414034	1.22412e-11	KC	pmid26694027	pg/ml	NULL
rs31605516	1	173414034	9.66432e-07	Food Intake AVG - 4 Wks Diet	pmid25651185	g	NULL
rs31605516	1	173414034	3.22106e-07	Food Intake - Day 3	pmid25651185	g	NULL
rs31606484	1	173413497	2.31838e-11	KC	pmid26694027	pg/ml	NULL
rs31606484	1	173413497	7.37969e-07	Food Intake - Day 3	pmid25651185	g	NULL
rs31606640	1	173463617	6.76735e-11	KC	pmid26694027	pg/ml	NULL
rs31606694	1	173390887	7.65678e-08	Food Intake - Day 1	pmid25651185	g	NULL
rs31606694	1	173390887	2.46867e-09	Food Intake AVG - 4 Wks Diet	pmid25651185	g	NULL
rs31607941	1	173454097	2.68931e-11	KC	pmid26694027	pg/ml	NULL
rs31607941	1	173454097	5.71231e-07	Food Intake - Day 3	pmid25651185	g	NULL
rs31607985	1	173435822	1.93039e-11	KC	pmid26694027	pg/ml	NULL
rs31607985	1	173435822	5.20717e-07	Food Intake - Day 3	pmid25651185	g	NULL
rs31608163	1	173370140	4.0092e-11	KC	pmid26694027	pg/ml	NULL
rs31608643	1	173351504	4.0092e-11	KC	pmid26694027	pg/ml	NULL
rs31608868	1	179319582	4.56009e-09	Food Intake - Day 1	pmid25651185	g	NULL
rs31608868	1	179319582	2.92488e-10	Food Intake AVG - 4 Wks Diet	pmid25651185	g	NULL
rs31608982	1	173429208	8.60344e-12	KC	pmid26694027	pg/ml	NULL
rs31609304	1	173369615	2.31692e-07	Food Intake - Day 1	pmid25651185	g	NULL
rs31609877	1	173423789	7.65678e-08	Food Intake - Day 1	pmid25651185	g	NULL
rs31609877	1	173423789	2.46867e-09	Food Intake AVG - 4 Wks Diet	pmid25651185	g	NULL
rs31609903	1	172138049	2.83011e-07	KC	pmid26694027	pg/ml	NULL
rs31610688	1	173403855	2.31838e-11	KC	pmid26694027	pg/ml	NULL
rs31610688	1	173403855	7.37969e-07	Food Intake - Day 3	pmid25651185	g	NULL
rs31610723	1	173451285	2.939e-11	KC	pmid26694027	pg/ml	NULL
rs31610723	1	173451285	5.55223e-07	Food Intake AVG - 4 Wks Diet	pmid25651185	g	NULL
rs31610723	1	173451285	1.49131e-07	Food Intake - Day 3	pmid25651185	g	NULL
rs31611468	1	173340126	4.0092e-11	KC	pmid26694027	pg/ml	NULL
rs31611679	1	173384889	3.38107e-12	KC	pmid26694027	pg/ml	NULL
rs31611679	1	173384889	7.44299e-07	Food Intake - Day 3	pmid25651185	g	NULL
rs31612132	1	173339174	4.0092e-11	KC	pmid26694027	pg/ml	NULL
rs31612297	1	173417785	2.31838e-11	KC	pmid26694027	pg/ml	NULL
rs31612297	1	173417785	7.37969e-07	Food Intake - Day 3	pmid25651185	g	NULL
rs31612418	1	173347893	8.34824e-07	KC	pmid26694027	pg/ml	NULL
rs31612605	1	180089039	1.50537e-07	Food Intake - Day 1	pmid25651185	g	NULL
rs31612605	1	180089039	1.95839e-09	Food Intake AVG - 4 Wks Diet	pmid25651185	g	NULL
rs31612671	1	173330386	8.34824e-07	KC	pmid26694027	pg/ml	NULL
rs31612847	1	173338628	4.0092e-11	KC	pmid26694027	pg/ml	NULL
rs31614030	1	173308737	9.29664e-07	Insulin pg/ml	pmid25651185	pg/ml	NULL
rs31614046	1	173289497	4.0092e-11	KC	pmid26694027	pg/ml	NULL
rs31614716	1	173317348	4.0092e-11	KC	pmid26694027	pg/ml	NULL
rs31617182	1	173206689	4.0092e-11	KC	pmid26694027	pg/ml	NULL
rs31618138	1	173206306	6.22789e-07	Food Intake - Day 1	pmid25651185	g	NULL
rs31618138	1	173206306	3.08437e-08	Food Intake AVG - 4 Wks Diet	pmid25651185	g	NULL
rs31618228	1	173321686	8.34824e-07	KC	pmid26694027	pg/ml	NULL
rs31618630	1	173213504	1.2568e-10	KC	pmid26694027	pg/ml	NULL
rs31619244	1	173205930	4.0092e-11	KC	pmid26694027	pg/ml	NULL
rs31619616	1	173213441	9.68868e-12	KC	pmid26694027	pg/ml	NULL
rs31619987	1	173236138	3.23677e-11	KC	pmid26694027	pg/ml	NULL
rs31620125	1	173321026	3.57056e-07	Food Intake - Day 1	pmid25651185	g	NULL
rs31620125	1	173321026	6.09372e-09	Food Intake AVG - 4 Wks Diet	pmid25651185	g	NULL
rs31622044	1	173183633	4.0092e-11	KC	pmid26694027	pg/ml	NULL
rs31622728	1	173221421	6.22789e-07	Food Intake - Day 1	pmid25651185	g	NULL
rs31622728	1	173221421	3.08437e-08	Food Intake AVG - 4 Wks Diet	pmid25651185	g	NULL
rs31626056	1	173006022	2.67661e-10	KC	pmid26694027	pg/ml	NULL
rs31626937	1	173005499	2.67661e-10	KC	pmid26694027	pg/ml	NULL
rs31626937	1	173005499	6.40147e-07	Food Intake - Day 3	pmid25651185	g	NULL
rs31628768	1	180095409	5.43259e-07	Food Intake - Day 3	pmid25651185	g	NULL
rs31629323	1	175319069	2.34383e-09	KC	pmid26694027	pg/ml	NULL
rs31629323	1	175319069	5.29199e-07	Food Intake - Day 3	pmid25651185	g	NULL
rs31629720	1	173057517	4.0092e-11	KC	pmid26694027	pg/ml	NULL
rs31630136	1	175318661	1.22389e-09	KC	pmid26694027	pg/ml	NULL
rs31630195	1	173106220	8.94317e-08	Food Intake AVG - 4 Wks Diet	pmid25651185	g	NULL
rs31630761	1	175276584	2.34383e-09	KC	pmid26694027	pg/ml	NULL
rs31630761	1	175276584	5.29199e-07	Food Intake - Day 3	pmid25651185	g	NULL
rs31630762	1	175276569	1.22389e-09	KC	pmid26694027	pg/ml	NULL
rs31631182	1	175268090	9.65773e-10	KC	pmid26694027	pg/ml	NULL
rs31631182	1	175268090	5.6022e-07	Food Intake - Day 3	pmid25651185	g	NULL
rs31631495	1	175239208	1.24968e-07	HDL	pmid20054062	mg/dl	NULL
rs31631524	1	175276446	2.27738e-07	Food Intake - Day 1	pmid25651185	g	NULL
rs31631524	1	175276446	6.87956e-07	Food Intake AVG - 4 Wks Diet	pmid25651185	g	NULL
rs31631869	1	173011310	1.22698e-07	Food Intake AVG - 4 Wks Diet	pmid25651185	g	NULL
rs31632471	1	173040888	4.0092e-11	KC	pmid26694027	pg/ml	NULL
rs31632643	1	173007136	5.98287e-07	Food Intake - Day 1	pmid25651185	g	NULL
rs31632643	1	173007136	7.53567e-09	Food Intake AVG - 4 Wks Diet	pmid25651185	g	NULL
rs31633280	1	173039759	4.0092e-11	KC	pmid26694027	pg/ml	NULL
rs31633368	1	175286926	9.65773e-10	KC	pmid26694027	pg/ml	NULL
rs31633368	1	175286926	5.6022e-07	Food Intake - Day 3	pmid25651185	g	NULL
rs31633371	1	175286782	2.27738e-07	Food Intake - Day 1	pmid25651185	g	NULL
rs31633371	1	175286782	6.87956e-07	Food Intake AVG - 4 Wks Diet	pmid25651185	g	NULL
rs31633913	1	175222432	9.65773e-10	KC	pmid26694027	pg/ml	NULL
rs31633913	1	175222432	5.6022e-07	Food Intake - Day 3	pmid25651185	g	NULL
rs31633927	1	175298420	1.05902e-09	KC	pmid26694027	pg/ml	NULL
rs31633927	1	175298420	3.90559e-07	Food Intake - Day 3	pmid25651185	g	NULL
rs31633931	1	175298245	8.83512e-11	KC	pmid26694027	pg/ml	NULL
rs31633931	1	175298245	5.6022e-07	Food Intake - Day 3	pmid25651185	g	NULL
rs31634297	1	175286465	9.65773e-10	KC	pmid26694027	pg/ml	NULL
rs31634297	1	175286465	5.6022e-07	Food Intake - Day 3	pmid25651185	g	NULL
rs31634694	1	175222377	6.10532e-07	Food Intake - Day 1	pmid25651185	g	NULL
rs31634806	1	175188025	9.65773e-10	KC	pmid26694027	pg/ml	NULL
rs31634807	1	175187979	6.10532e-07	Food Intake - Day 1	pmid25651185	g	NULL
rs31634811	1	175187856	1.24968e-07	HDL	pmid20054062	mg/dl	NULL
rs31635247	1	175269981	2.34383e-09	KC	pmid26694027	pg/ml	NULL
rs31635247	1	175269981	5.29199e-07	Food Intake - Day 3	pmid25651185	g	NULL
rs31636255	1	175170188	9.65773e-10	KC	pmid26694027	pg/ml	NULL
rs31636255	1	175170188	5.6022e-07	Food Intake - Day 3	pmid25651185	g	NULL
rs31636939	1	175144102	9.65773e-10	KC	pmid26694027	pg/ml	NULL
rs31636939	1	175144102	5.6022e-07	Food Intake - Day 3	pmid25651185	g	NULL
rs31637636	1	175196012	9.65773e-10	KC	pmid26694027	pg/ml	NULL
rs31637636	1	175196012	5.6022e-07	Food Intake - Day 3	pmid25651185	g	NULL
rs31637858	1	179930485	5.76405e-07	Food Intake AVG - 4 Wks Diet	pmid25651185	g	NULL
rs31637858	1	179930485	1.3014e-07	Food Intake - Day 3	pmid25651185	g	NULL
rs31639308	1	178915115	1.52048e-09	Food Intake - Day 1	pmid25651185	g	NULL
rs31639308	1	178915115	3.28357e-10	Food Intake AVG - 4 Wks Diet	pmid25651185	g	NULL
rs31642205	1	175129607	6.10532e-07	Food Intake - Day 1	pmid25651185	g	NULL
rs31642210	1	175128987	9.65773e-10	KC	pmid26694027	pg/ml	NULL
rs31642210	1	175128987	5.6022e-07	Food Intake - Day 3	pmid25651185	g	NULL
rs31643168	1	177012526	5.017e-08	Food Intake - Day 1	pmid25651185	g	NULL
rs31643168	1	177012526	4.99017e-10	Food Intake AVG - 4 Wks Diet	pmid25651185	g	NULL
rs31644985	1	175111731	1.24968e-07	HDL	pmid20054062	mg/dl	NULL
rs31645471	1	175100041	6.10532e-07	Food Intake - Day 1	pmid25651185	g	NULL
rs31645473	1	175100020	6.10532e-07	Food Intake - Day 1	pmid25651185	g	NULL
rs31648703	1	181369346	2.48651e-09	Food Intake - Day 1	pmid25651185	g	NULL
rs31648703	1	181369346	1.43816e-07	BF	pmid25651185	%	(final % - initial %) / initial %
rs31648703	1	181369346	7.1111e-10	Food Intake AVG - 4 Wks Diet	pmid25651185	g	NULL
rs31653954	1	178625209	3.85097e-08	Food Intake - Day 1	pmid25651185	g	NULL
rs31653954	1	178625209	2.22479e-09	Food Intake AVG - 4 Wks Diet	pmid25651185	g	NULL
rs31655561	1	180384510	6.87085e-08	Food Intake - Day 1	pmid25651185	g	NULL
rs31655561	1	180384510	8.31252e-07	BF	pmid25651185	%	(final % - initial %) / initial %
rs31655561	1	180384510	8.27871e-09	Food Intake AVG - 4 Wks Diet	pmid25651185	g	NULL
rs31658682	1	137073897	6.30275e-07	MIP-1b	pmid26694027	pg/ml	NULL
rs31661941	1	177024630	8.11819e-08	Food Intake - Day 1	pmid25651185	g	NULL
rs31661941	1	177024630	1.22207e-09	Food Intake AVG - 4 Wks Diet	pmid25651185	g	NULL
rs31664949	1	182628079	7.68177e-09	Food Intake - Day 1	pmid25651185	g	NULL
rs31664949	1	182628079	9.23473e-08	BF	pmid25651185	%	(final % - initial %) / initial %
rs31664949	1	182628079	1.73387e-09	Food Intake AVG - 4 Wks Diet	pmid25651185	g	NULL
rs31666221	1	180754598	3.026e-08	Food Intake - Day 1	pmid25651185	g	NULL
rs31666221	1	180754598	6.07282e-07	BF	pmid25651185	%	(final % - initial %) / initial %
rs31666221	1	180754598	3.49963e-09	Food Intake AVG - 4 Wks Diet	pmid25651185	g	NULL
rs31668869	1	175600931	5.75601e-07	Insulin pg/ml	pmid25651185	pg/ml	NULL
rs31668869	1	175600931	1.54022e-07	Food Intake AVG - 4 Wks Diet	pmid25651185	g	NULL
rs31668869	1	175600931	3.70897e-07	Food Intake - Day 3	pmid25651185	g	NULL
rs31672979	1	181728885	2.48651e-09	Food Intake - Day 1	pmid25651185	g	NULL
rs31672979	1	181728885	1.43816e-07	BF	pmid25651185	%	(final % - initial %) / initial %
rs31672979	1	181728885	7.1111e-10	Food Intake AVG - 4 Wks Diet	pmid25651185	g	NULL
rs31680312	1	180095011	2.24161e-08	Food Intake - Day 1	pmid25651185	g	NULL
rs31680312	1	180095011	6.6522e-09	Food Intake AVG - 4 Wks Diet	pmid25651185	g	NULL
rs31688239	1	174241778	5.91988e-10	KC	pmid26694027	pg/ml	NULL
rs31691064	1	174687861	9.65773e-10	KC	pmid26694027	pg/ml	NULL
rs31691064	1	174687861	5.6022e-07	Food Intake - Day 3	pmid25651185	g	NULL
rs31692980	1	177026139	1.40791e-08	Food Intake AVG - 4 Wks Diet	pmid25651185	g	NULL
rs31694115	1	178748189	2.18026e-08	Food Intake - Day 1	pmid25651185	g	NULL
rs31694115	1	178748189	2.43539e-09	Food Intake AVG - 4 Wks Diet	pmid25651185	g	NULL
rs31704454	1	177511545	2.37256e-08	Food Intake - Day 1	pmid25651185	g	NULL
rs31704454	1	177511545	2.18109e-09	Food Intake AVG - 4 Wks Diet	pmid25651185	g	NULL
rs31706474	1	175389972	1.21313e-07	KC	pmid26694027	pg/ml	NULL
rs31706474	1	175389972	6.57841e-07	Food Intake AVG - 4 Wks Diet	pmid25651185	g	NULL
rs31706474	1	175389972	8.08261e-08	Food Intake - Day 3	pmid25651185	g	NULL
rs31708943	1	176987729	3.93217e-07	Food Intake - Day 1	pmid25651185	g	NULL
rs31708943	1	176987729	3.64683e-07	Food Intake AVG - 4 Wks Diet	pmid25651185	g	NULL
rs31714472	1	176990480	5.19058e-08	Food Intake - Day 1	pmid25651185	g	NULL
rs31714472	1	176990480	4.7548e-10	Food Intake AVG - 4 Wks Diet	pmid25651185	g	NULL
rs31722888	1	176144025	5.27702e-07	Food Intake - Day 1	pmid25651185	g	NULL
rs31722888	1	176144025	1.63197e-09	Food Intake AVG - 4 Wks Diet	pmid25651185	g	NULL
rs31723469	1	179964050	6.60112e-09	Food Intake - Day 1	pmid25651185	g	NULL
rs31723469	1	179964050	3.64065e-07	BF	pmid25651185	%	(final % - initial %) / initial %
rs31723469	1	179964050	1.16857e-10	Food Intake AVG - 4 Wks Diet	pmid25651185	g	NULL
rs31730177	1	182345193	1.12362e-08	Food Intake - Day 1	pmid25651185	g	NULL
rs31730177	1	182345193	2.23801e-07	BF	pmid25651185	%	(final % - initial %) / initial %
rs31730177	1	182345193	8.90622e-10	Food Intake AVG - 4 Wks Diet	pmid25651185	g	NULL
rs31730578	1	179865000	8.03825e-07	Food Intake - Day 3	pmid25651185	g	NULL
rs31741702	1	182530969	3.63536e-08	Food Intake - Day 1	pmid25651185	g	NULL
rs31741702	1	182530969	2.159e-07	BF	pmid25651185	%	(final % - initial %) / initial %
rs31741702	1	182530969	1.77366e-09	Food Intake AVG - 4 Wks Diet	pmid25651185	g	NULL
rs31742175	1	182198414	2.67092e-08	Food Intake - Day 1	pmid25651185	g	NULL
rs31742175	1	182198414	9.24933e-08	BF	pmid25651185	%	(final % - initial %) / initial %
rs31742175	1	182198414	3.46323e-09	Food Intake AVG - 4 Wks Diet	pmid25651185	g	NULL
rs31748529	1	180619025	7.43325e-07	Food Intake - Day 3	pmid25651185	g	NULL
rs31748897	1	177206326	5.99521e-08	Food Intake - Day 1	pmid25651185	g	NULL
rs31748897	1	177206326	2.44904e-07	Food Intake AVG - 4 Wks Diet	pmid25651185	g	NULL
rs31749849	1	181934832	7.68177e-09	Food Intake - Day 1	pmid25651185	g	NULL
rs31749849	1	181934832	9.23473e-08	BF	pmid25651185	%	(final % - initial %) / initial %
rs31749849	1	181934832	1.73387e-09	Food Intake AVG - 4 Wks Diet	pmid25651185	g	NULL
rs31750312	1	175325661	9.65773e-10	KC	pmid26694027	pg/ml	NULL
rs31750312	1	175325661	5.6022e-07	Food Intake - Day 3	pmid25651185	g	NULL
rs31750691	1	181114227	4.88928e-07	Food Intake - Day 1	pmid25651185	g	NULL
rs31750691	1	181114227	3.72869e-07	BF	pmid25651185	%	(final % - initial %) / initial %
rs31750691	1	181114227	1.19742e-08	Food Intake AVG - 4 Wks Diet	pmid25651185	g	NULL
rs31752475	1	172012379	2.83011e-07	KC	pmid26694027	pg/ml	NULL
rs31762665	1	177088592	9.56151e-09	Food Intake - Day 1	pmid25651185	g	NULL
rs31762665	1	177088592	5.69401e-07	BF	pmid25651185	%	(final % - initial %) / initial %
rs31762665	1	177088592	3.16408e-10	Food Intake AVG - 4 Wks Diet	pmid25651185	g	NULL
rs31773192	1	170938358	4.18422e-08	total cholesterol	pmid20054062	mg/dl	NULL
rs31773192	1	170938358	1.97901e-09	HDL	pmid20054062	mg/dl	NULL
rs31773578	1	177542360	2.37256e-08	Food Intake - Day 1	pmid25651185	g	NULL
rs31773578	1	177542360	2.18109e-09	Food Intake AVG - 4 Wks Diet	pmid25651185	g	NULL
rs31773996	1	178970748	6.72491e-08	Food Intake - Day 1	pmid25651185	g	NULL
rs31773996	1	178970748	1.1032e-08	Food Intake AVG - 4 Wks Diet	pmid25651185	g	NULL
rs31777232	1	172937148	3.10341e-10	KC	pmid26694027	pg/ml	NULL
rs31783229	1	180757617	1.61247e-09	Food Intake - Day 1	pmid25651185	g	NULL
rs31783229	1	180757617	8.65922e-08	BF	pmid25651185	%	(final % - initial %) / initial %
rs31783229	1	180757617	3.39999e-10	Food Intake AVG - 4 Wks Diet	pmid25651185	g	NULL
rs31783348	1	174840751	1.1031e-08	KC	pmid26694027	pg/ml	NULL
rs31783348	1	174840751	7.01503e-07	Food Intake AVG - 4 Wks Diet	pmid25651185	g	NULL
rs31783348	1	174840751	3.56518e-07	Food Intake - Day 3	pmid25651185	g	NULL
rs31791525	1	180003917	9.99362e-07	Food Intake AVG - 4 Wks Diet	pmid25651185	g	NULL
rs31791525	1	180003917	5.05454e-07	Food Intake - Day 3	pmid25651185	g	NULL
rs31797130	1	177797440	4.41855e-08	Food Intake - Day 1	pmid25651185	g	NULL
rs31797130	1	177797440	3.73996e-09	Food Intake AVG - 4 Wks Diet	pmid25651185	g	NULL
rs31797355	1	168533128	2.13374e-07	total cholesterol	pmid20054062	mg/dl	NULL
rs31797355	1	168533128	1.20746e-07	HDL	pmid20054062	mg/dl	NULL
rs31797535	1	181337174	2.48651e-09	Food Intake - Day 1	pmid25651185	g	NULL
rs31797535	1	181337174	1.43816e-07	BF	pmid25651185	%	(final % - initial %) / initial %
rs31797535	1	181337174	7.1111e-10	Food Intake AVG - 4 Wks Diet	pmid25651185	g	NULL
rs31797753	1	176613157	1.10328e-08	Food Intake AVG - 4 Wks Diet	pmid25651185	g	NULL
rs31798835	1	175405377	4.5782e-09	KC	pmid26694027	pg/ml	NULL
rs31798835	1	175405377	5.24946e-07	Food Intake - Day 3	pmid25651185	g	NULL
rs31806090	1	180785752	2.48651e-09	Food Intake - Day 1	pmid25651185	g	NULL
rs31806090	1	180785752	1.43816e-07	BF	pmid25651185	%	(final % - initial %) / initial %
rs31806090	1	180785752	7.1111e-10	Food Intake AVG - 4 Wks Diet	pmid25651185	g	NULL
rs31810848	1	180367558	9.83529e-08	Food Intake - Day 1	pmid25651185	g	NULL
rs31810848	1	180367558	1.03956e-08	Food Intake AVG - 4 Wks Diet	pmid25651185	g	NULL
rs31812082	1	172741762	4.93321e-07	Food Intake AVG - 4 Wks Diet	pmid25651185	g	NULL
rs31818499	1	178641263	3.85097e-08	Food Intake - Day 1	pmid25651185	g	NULL
rs31818499	1	178641263	2.22479e-09	Food Intake AVG - 4 Wks Diet	pmid25651185	g	NULL
rs31818901	1	136476292	5.09807e-09	MIP-1b	pmid26694027	pg/ml	NULL
rs31823567	1	179928665	2.62293e-07	Food Intake AVG - 4 Wks Diet	pmid25651185	g	NULL
rs31823567	1	179928665	6.3824e-08	Food Intake - Day 3	pmid25651185	g	NULL
rs31823711	1	175425459	4.5782e-09	KC	pmid26694027	pg/ml	NULL
rs31823711	1	175425459	5.24946e-07	Food Intake - Day 3	pmid25651185	g	NULL
rs31824246	1	168533143	2.70821e-07	total cholesterol	pmid20054062	mg/dl	NULL
rs31824246	1	168533143	1.758e-07	HDL	pmid20054062	mg/dl	NULL
rs31828585	1	136682065	1.12236e-07	MIP-1b	pmid26694027	pg/ml	NULL
rs31830225	1	176986960	3.93217e-07	Food Intake - Day 1	pmid25651185	g	NULL
rs31830225	1	176986960	3.64683e-07	Food Intake AVG - 4 Wks Diet	pmid25651185	g	NULL
rs31830240	1	182695752	2.938e-08	Food Intake - Day 1	pmid25651185	g	NULL
rs31830240	1	182695752	3.54594e-08	BF	pmid25651185	%	(final % - initial %) / initial %
rs31830240	1	182695752	4.49367e-09	Food Intake AVG - 4 Wks Diet	pmid25651185	g	NULL
rs31832845	1	181806736	9.04971e-09	Food Intake - Day 1	pmid25651185	g	NULL
rs31832845	1	181806736	3.33627e-08	BF	pmid25651185	%	(final % - initial %) / initial %
rs31832845	1	181806736	1.66754e-09	Food Intake AVG - 4 Wks Diet	pmid25651185	g	NULL
rs31834814	1	180916675	8.85438e-08	Food Intake - Day 1	pmid25651185	g	NULL
rs31834814	1	180916675	3.95678e-07	BF	pmid25651185	%	(final % - initial %) / initial %
rs31834814	1	180916675	1.37233e-08	Food Intake AVG - 4 Wks Diet	pmid25651185	g	NULL
rs31834941	1	182628106	7.68177e-09	Food Intake - Day 1	pmid25651185	g	NULL
rs31834941	1	182628106	9.23473e-08	BF	pmid25651185	%	(final % - initial %) / initial %
rs31834941	1	182628106	1.73387e-09	Food Intake AVG - 4 Wks Diet	pmid25651185	g	NULL
rs31838612	1	179158314	1.52048e-09	Food Intake - Day 1	pmid25651185	g	NULL
rs31838612	1	179158314	3.28357e-10	Food Intake AVG - 4 Wks Diet	pmid25651185	g	NULL
rs31841951	1	181631608	2.48651e-09	Food Intake - Day 1	pmid25651185	g	NULL
rs31841951	1	181631608	1.43816e-07	BF	pmid25651185	%	(final % - initial %) / initial %
rs31841951	1	181631608	7.1111e-10	Food Intake AVG - 4 Wks Diet	pmid25651185	g	NULL
rs31842921	1	174650604	9.65773e-10	KC	pmid26694027	pg/ml	NULL
rs31842921	1	174650604	5.6022e-07	Food Intake - Day 3	pmid25651185	g	NULL
rs31844298	1	182627745	7.68177e-09	Food Intake - Day 1	pmid25651185	g	NULL
rs31844298	1	182627745	9.23473e-08	BF	pmid25651185	%	(final % - initial %) / initial %
rs31844298	1	182627745	1.73387e-09	Food Intake AVG - 4 Wks Diet	pmid25651185	g	NULL
rs31852508	1	175054333	9.65773e-10	KC	pmid26694027	pg/ml	NULL
rs31852508	1	175054333	5.6022e-07	Food Intake - Day 3	pmid25651185	g	NULL
rs31865046	1	182266789	1.12362e-08	Food Intake - Day 1	pmid25651185	g	NULL
rs31865046	1	182266789	2.23801e-07	BF	pmid25651185	%	(final % - initial %) / initial %
rs31865046	1	182266789	8.90622e-10	Food Intake AVG - 4 Wks Diet	pmid25651185	g	NULL
rs31865981	1	174218038	1.96817e-07	Food Intake - Day 1	pmid25651185	g	NULL
rs31865981	1	174218038	5.93716e-09	Food Intake AVG - 4 Wks Diet	pmid25651185	g	NULL
rs31866568	1	179233256	1.52048e-09	Food Intake - Day 1	pmid25651185	g	NULL
rs31866568	1	179233256	3.28357e-10	Food Intake AVG - 4 Wks Diet	pmid25651185	g	NULL
rs31868218	1	175789094	7.08732e-07	Food Intake - Day 2	pmid25651185	g	NULL
rs31868218	1	175789094	5.46499e-09	Food Intake AVG - 4 Wks Diet	pmid25651185	g	NULL
rs31868218	1	175789094	7.87733e-09	Food Intake - Day 3	pmid25651185	g	NULL
rs31868924	1	174844026	7.67966e-08	KC	pmid26694027	pg/ml	NULL
rs31878668	1	172381331	2.64348e-07	KC	pmid26694027	pg/ml	NULL
rs31882682	1	181974216	7.68177e-09	Food Intake - Day 1	pmid25651185	g	NULL
rs31882682	1	181974216	9.23473e-08	BF	pmid25651185	%	(final % - initial %) / initial %
rs31882682	1	181974216	1.73387e-09	Food Intake AVG - 4 Wks Diet	pmid25651185	g	NULL
rs31884671	1	180700427	2.48651e-09	Food Intake - Day 1	pmid25651185	g	NULL
rs31884671	1	180700427	1.43816e-07	BF	pmid25651185	%	(final % - initial %) / initial %
rs31884671	1	180700427	7.1111e-10	Food Intake AVG - 4 Wks Diet	pmid25651185	g	NULL
rs31884974	1	177108343	2.33975e-07	Food Intake AVG - 4 Wks Diet	pmid25651185	g	NULL
rs31885491	1	174976368	9.65773e-10	KC	pmid26694027	pg/ml	NULL
rs31885491	1	174976368	5.6022e-07	Food Intake - Day 3	pmid25651185	g	NULL
rs31885914	1	176557307	2.78028e-07	HDL	pmid20054062	mg/dl	NULL
rs31886088	1	181232668	6.83283e-07	Food Intake AVG - 4 Wks Diet	pmid25651185	g	NULL
rs31886088	1	181232668	7.09284e-07	Food Intake - Day 3	pmid25651185	g	NULL
rs31891489	1	180911045	2.43783e-07	Food Intake - Day 1	pmid25651185	g	NULL
rs31891489	1	180911045	2.73934e-07	BF	pmid25651185	%	(final % - initial %) / initial %
rs31891489	1	180911045	2.24873e-08	Food Intake AVG - 4 Wks Diet	pmid25651185	g	NULL
rs31903034	1	179086184	3.93693e-07	Food Intake - Day 1	pmid25651185	g	NULL
rs31903034	1	179086184	1.70372e-08	Food Intake AVG - 4 Wks Diet	pmid25651185	g	NULL
rs31913738	1	176922168	1.96907e-07	total cholesterol	pmid20054062	mg/dl	NULL
rs31913738	1	176922168	2.53751e-07	HDL	pmid20054062	mg/dl	NULL
rs31923726	1	176517370	8.91423e-07	Food Intake AVG - 4 Wks Diet	pmid25651185	g	NULL
rs31926558	1	179936247	1.57486e-07	Food Intake - Day 1	pmid25651185	g	NULL
rs31926558	1	179936247	3.93572e-09	Food Intake AVG - 4 Wks Diet	pmid25651185	g	NULL
rs31928546	1	179775160	5.14437e-08	Food Intake - Day 1	pmid25651185	g	NULL
rs31928546	1	179775160	6.68996e-09	Food Intake AVG - 4 Wks Diet	pmid25651185	g	NULL
rs31928650	1	174854882	9.65773e-10	KC	pmid26694027	pg/ml	NULL
rs31928650	1	174854882	5.6022e-07	Food Intake - Day 3	pmid25651185	g	NULL
rs31929136	1	181364066	8.06106e-07	Food Intake AVG - 4 Wks Diet	pmid25651185	g	NULL
rs31929136	1	181364066	7.57656e-07	Food Intake - Day 3	pmid25651185	g	NULL
rs31929993	1	174873890	6.3156e-08	KC	pmid26694027	pg/ml	NULL
rs31929993	1	174873890	3.21181e-07	Food Intake - Day 3	pmid25651185	g	NULL
rs31931745	1	187317799	7.38717e-07	Food Intake AVG - 4 Wks Diet	pmid25651185	g	NULL
rs31937393	1	178273418	6.13502e-08	Food Intake - Day 1	pmid25651185	g	NULL
rs31937393	1	178273418	5.72571e-09	Food Intake AVG - 4 Wks Diet	pmid25651185	g	NULL
rs31939401	1	172739227	2.24984e-08	KC	pmid26694027	pg/ml	NULL
rs31940934	1	180713519	8.06106e-07	Food Intake AVG - 4 Wks Diet	pmid25651185	g	NULL
rs31940934	1	180713519	7.57656e-07	Food Intake - Day 3	pmid25651185	g	NULL
rs31947491	1	178432210	2.37171e-07	Food Intake AVG - 4 Wks Diet	pmid25651185	g	NULL
rs31955829	1	182380462	6.92076e-08	Food Intake - Day 1	pmid25651185	g	NULL
rs31955829	1	182380462	4.53021e-07	BF	pmid25651185	%	(final % - initial %) / initial %
rs31955829	1	182380462	4.97281e-09	Food Intake AVG - 4 Wks Diet	pmid25651185	g	NULL
rs31959664	1	175604556	9.82044e-07	Insulin pg/ml	pmid25651185	pg/ml	NULL
rs31961850	1	179292041	5.99836e-09	Food Intake - Day 1	pmid25651185	g	NULL
rs31961850	1	179292041	6.64686e-10	Food Intake AVG - 4 Wks Diet	pmid25651185	g	NULL
rs31963148	1	136875035	2.04027e-07	MIP-1b	pmid26694027	pg/ml	NULL
rs31988899	1	178989541	4.56009e-09	Food Intake - Day 1	pmid25651185	g	NULL
rs31988899	1	178989541	2.92488e-10	Food Intake AVG - 4 Wks Diet	pmid25651185	g	NULL
rs31991464	1	171296427	2.60591e-07	KC	pmid26694027	pg/ml	NULL
rs31994965	1	179202458	1.23636e-08	Food Intake - Day 1	pmid25651185	g	NULL
rs31994965	1	179202458	3.68852e-10	Food Intake AVG - 4 Wks Diet	pmid25651185	g	NULL
rs31995807	1	181904151	1.36774e-07	Food Intake - Day 1	pmid25651185	g	NULL
rs31995807	1	181904151	5.72076e-07	BF	pmid25651185	%	(final % - initial %) / initial %
rs31995807	1	181904151	7.70528e-08	Food Intake AVG - 4 Wks Diet	pmid25651185	g	NULL
rs32005806	1	136673243	7.77707e-09	MIP-1b	pmid26694027	pg/ml	NULL
rs32007708	1	178748316	2.18026e-08	Food Intake - Day 1	pmid25651185	g	NULL
rs32007708	1	178748316	2.43539e-09	Food Intake AVG - 4 Wks Diet	pmid25651185	g	NULL
rs32009591	1	181952353	1.86465e-08	Food Intake - Day 1	pmid25651185	g	NULL
rs32009591	1	181952353	7.24085e-09	Food Intake AVG - 4 Wks Diet	pmid25651185	g	NULL
rs32010243	1	172414490	2.64348e-07	KC	pmid26694027	pg/ml	NULL
rs32010378	1	176620013	4.95063e-08	Food Intake - Day 1	pmid25651185	g	NULL
rs32010378	1	176620013	4.30785e-10	Food Intake AVG - 4 Wks Diet	pmid25651185	g	NULL
rs32011306	1	42543759	5.16895e-08	Velocity of circumferential shortening (day 7)	pmid25480693	%/ms	Velocity of circumferential shortening
rs32011306	1	42543759	4.54244e-08	Mean normalized systolic ejection rate (day 7)	pmid25480693	%/ms	Mean normalized systolic ejection rate
rs32013735	1	173608404	2.83905e-11	KC	pmid26694027	pg/ml	NULL
rs32013735	1	173608404	4.56158e-07	Food Intake - Day 3	pmid25651185	g	NULL
rs32033342	1	172867036	3.64215e-08	KC	pmid26694027	pg/ml	NULL
rs32033854	1	50033523	1.38846e-08	BF	pmid25651185	%	(final % - initial %) / initial %
rs32036421	1	182283335	8.74093e-07	Food Intake AVG - 4 Wks Diet	pmid25651185	g	NULL
rs32041102	1	172742225	7.45698e-07	Food Intake AVG - 4 Wks Diet	pmid25651185	g	NULL
rs32041887	1	180997131	2.54057e-09	Food Intake - Day 1	pmid25651185	g	NULL
rs32041887	1	180997131	1.4723e-07	BF	pmid25651185	%	(final % - initial %) / initial %
rs32041887	1	180997131	6.409e-10	Food Intake AVG - 4 Wks Diet	pmid25651185	g	NULL
rs32050301	1	182376324	7.68177e-09	Food Intake - Day 1	pmid25651185	g	NULL
rs32050301	1	182376324	9.23473e-08	BF	pmid25651185	%	(final % - initial %) / initial %
rs32050301	1	182376324	1.73387e-09	Food Intake AVG - 4 Wks Diet	pmid25651185	g	NULL
rs32053749	1	178309612	1.37141e-07	Food Intake - Day 1	pmid25651185	g	NULL
rs32053749	1	178309612	2.77243e-08	Food Intake AVG - 4 Wks Diet	pmid25651185	g	NULL
rs32055406	1	180826925	2.48651e-09	Food Intake - Day 1	pmid25651185	g	NULL
rs32055406	1	180826925	1.43816e-07	BF	pmid25651185	%	(final % - initial %) / initial %
rs32055406	1	180826925	7.1111e-10	Food Intake AVG - 4 Wks Diet	pmid25651185	g	NULL
rs32056689	1	178231180	2.92977e-08	Food Intake - Day 1	pmid25651185	g	NULL
rs32056689	1	178231180	7.12822e-09	Food Intake AVG - 4 Wks Diet	pmid25651185	g	NULL
rs32059203	1	181667488	2.48651e-09	Food Intake - Day 1	pmid25651185	g	NULL
rs32059203	1	181667488	1.43816e-07	BF	pmid25651185	%	(final % - initial %) / initial %
rs32059203	1	181667488	7.1111e-10	Food Intake AVG - 4 Wks Diet	pmid25651185	g	NULL
rs32071194	1	168186482	3.10365e-08	HDL	pmid20054062	mg/dl	NULL
rs32071194	1	168186482	3.00889e-07	total cholesterol	pmid20054062	mg/dl	NULL
rs32073903	1	189101206	6.47611e-08	IL-1b	pmid26694027	pg/ml	NULL
rs32073903	1	189101206	9.90182e-07	TNFa	pmid26694027	pg/ml	NULL
rs32076503	1	181788007	7.68177e-09	Food Intake - Day 1	pmid25651185	g	NULL
rs32076503	1	181788007	9.23473e-08	BF	pmid25651185	%	(final % - initial %) / initial %
rs32076503	1	181788007	1.73387e-09	Food Intake AVG - 4 Wks Diet	pmid25651185	g	NULL
rs32077545	1	174674981	9.65773e-10	KC	pmid26694027	pg/ml	NULL
rs32077545	1	174674981	5.6022e-07	Food Intake - Day 3	pmid25651185	g	NULL
rs32081558	1	174216387	1.84431e-07	Food Intake - Day 1	pmid25651185	g	NULL
rs32081558	1	174216387	5.64632e-09	Food Intake AVG - 4 Wks Diet	pmid25651185	g	NULL
rs32081752	1	176665771	2.47082e-07	Food Intake - Day 1	pmid25651185	g	NULL
rs32081752	1	176665771	2.44817e-07	Food Intake AVG - 4 Wks Diet	pmid25651185	g	NULL
rs32088208	1	175772374	4.85665e-08	KC	pmid26694027	pg/ml	NULL
rs32088208	1	175772374	4.52925e-07	Food Intake AVG - 4 Wks Diet	pmid25651185	g	NULL
rs32088208	1	175772374	1.85127e-07	Food Intake - Day 3	pmid25651185	g	NULL
rs32091863	1	181598007	2.48651e-09	Food Intake - Day 1	pmid25651185	g	NULL
rs32091863	1	181598007	1.43816e-07	BF	pmid25651185	%	(final % - initial %) / initial %
rs32091863	1	181598007	7.1111e-10	Food Intake AVG - 4 Wks Diet	pmid25651185	g	NULL
rs32091929	1	173050280	4.0092e-11	KC	pmid26694027	pg/ml	NULL
rs32092073	1	172827437	4.31222e-08	Food Intake AVG - 4 Wks Diet	pmid25651185	g	NULL
rs32093724	1	171012579	5.22667e-08	total cholesterol	pmid20054062	mg/dl	NULL
rs32093724	1	171012579	1.06715e-09	HDL	pmid20054062	mg/dl	NULL
rs32103830	1	177019477	5.19058e-08	Food Intake - Day 1	pmid25651185	g	NULL
rs32103830	1	177019477	4.7548e-10	Food Intake AVG - 4 Wks Diet	pmid25651185	g	NULL
rs32108053	1	179025125	1.31659e-07	Food Intake - Day 1	pmid25651185	g	NULL
rs32108053	1	179025125	1.85557e-09	Food Intake AVG - 4 Wks Diet	pmid25651185	g	NULL
rs32110932	1	178493001	2.7963e-09	Food Intake - Day 1	pmid25651185	g	NULL
rs32110932	1	178493001	3.03001e-10	Food Intake AVG - 4 Wks Diet	pmid25651185	g	NULL
rs32113784	1	181634166	2.48651e-09	Food Intake - Day 1	pmid25651185	g	NULL
rs32113784	1	181634166	1.43816e-07	BF	pmid25651185	%	(final % - initial %) / initial %
rs32113784	1	181634166	7.1111e-10	Food Intake AVG - 4 Wks Diet	pmid25651185	g	NULL
rs32119328	1	178752283	2.18026e-08	Food Intake - Day 1	pmid25651185	g	NULL
rs32119328	1	178752283	2.43539e-09	Food Intake AVG - 4 Wks Diet	pmid25651185	g	NULL
rs32121693	1	180362870	6.87085e-08	Food Intake - Day 1	pmid25651185	g	NULL
rs32121693	1	180362870	8.31252e-07	BF	pmid25651185	%	(final % - initial %) / initial %
rs32121693	1	180362870	8.27871e-09	Food Intake AVG - 4 Wks Diet	pmid25651185	g	NULL
rs32124348	1	144540957	8.28269e-08	grip	reue	NA	NA
rs32124348	1	144540957	8.41144e-07	gripbw	reue	NA	NA
rs32125209	1	175978486	5.27795e-07	HDL	pmid20054062	mg/dl	NULL
rs32127059	1	180107659	1.52048e-09	Food Intake - Day 1	pmid25651185	g	NULL
rs32127059	1	180107659	3.28357e-10	Food Intake AVG - 4 Wks Diet	pmid25651185	g	NULL
rs32136135	1	176530006	7.36415e-08	HDL	pmid20054062	mg/dl	NULL
rs32136135	1	176530006	4.35291e-07	total cholesterol	pmid20054062	mg/dl	NULL
rs32138214	1	177186072	8.06924e-09	Food Intake - Day 1	pmid25651185	g	NULL
rs32138214	1	177186072	1.52466e-10	Food Intake AVG - 4 Wks Diet	pmid25651185	g	NULL
rs32139617	1	175611356	5.93187e-08	Food Intake AVG - 4 Wks Diet	pmid25651185	g	NULL
rs32139617	1	175611356	9.17514e-08	Food Intake - Day 3	pmid25651185	g	NULL
rs32140265	1	179064790	2.8464e-09	Food Intake - Day 1	pmid25651185	g	NULL
rs32140265	1	179064790	1.68201e-10	Food Intake AVG - 4 Wks Diet	pmid25651185	g	NULL
rs32143862	1	178577981	3.85097e-08	Food Intake - Day 1	pmid25651185	g	NULL
rs32143862	1	178577981	2.22479e-09	Food Intake AVG - 4 Wks Diet	pmid25651185	g	NULL
rs32145353	1	179506432	1.60625e-08	Food Intake - Day 1	pmid25651185	g	NULL
rs32145353	1	179506432	1.49448e-09	Food Intake AVG - 4 Wks Diet	pmid25651185	g	NULL
rs32150944	1	180996439	1.31902e-08	Food Intake - Day 1	pmid25651185	g	NULL
rs32150944	1	180996439	1.12693e-07	BF	pmid25651185	%	(final % - initial %) / initial %
rs32150944	1	180996439	1.68702e-09	Food Intake AVG - 4 Wks Diet	pmid25651185	g	NULL
rs32152308	1	181582437	2.48651e-09	Food Intake - Day 1	pmid25651185	g	NULL
rs32152308	1	181582437	1.43816e-07	BF	pmid25651185	%	(final % - initial %) / initial %
rs32152308	1	181582437	7.1111e-10	Food Intake AVG - 4 Wks Diet	pmid25651185	g	NULL
rs32154858	1	174919689	2.41797e-07	KC	pmid26694027	pg/ml	NULL
rs32154858	1	174919689	3.05029e-07	Food Intake - Day 3	pmid25651185	g	NULL
rs32155451	1	136691925	7.77707e-09	MIP-1b	pmid26694027	pg/ml	NULL
rs32156609	1	179101222	5.48221e-08	Food Intake - Day 1	pmid25651185	g	NULL
rs32156609	1	179101222	1.27567e-09	Food Intake AVG - 4 Wks Diet	pmid25651185	g	NULL
rs32156652	1	174843412	7.67966e-08	KC	pmid26694027	pg/ml	NULL
rs32160765	1	180108247	6.29408e-07	Food Intake - Day 3	pmid25651185	g	NULL
rs32174563	1	175776733	4.85665e-08	KC	pmid26694027	pg/ml	NULL
rs32175842	1	175457032	2.25179e-08	KC	pmid26694027	pg/ml	NULL
rs32175842	1	175457032	4.66293e-07	Food Intake - Day 3	pmid25651185	g	NULL
rs32175967	1	178722273	4.56009e-09	Food Intake - Day 1	pmid25651185	g	NULL
rs32175967	1	178722273	2.92488e-10	Food Intake AVG - 4 Wks Diet	pmid25651185	g	NULL
rs32177103	1	182389035	6.23392e-07	BF	pmid25651185	%	(final % - initial %) / initial %
rs32177103	1	182389035	1.78159e-07	Food Intake AVG - 4 Wks Diet	pmid25651185	g	NULL
rs32180638	1	181348037	1.30603e-08	Food Intake - Day 1	pmid25651185	g	NULL
rs32180638	1	181348037	1.27058e-07	BF	pmid25651185	%	(final % - initial %) / initial %
rs32180638	1	181348037	1.83253e-09	Food Intake AVG - 4 Wks Diet	pmid25651185	g	NULL
rs32182515	1	176779108	7.79137e-07	Food Intake - Day 1	pmid25651185	g	NULL
rs32182515	1	176779108	4.39776e-07	Food Intake AVG - 4 Wks Diet	pmid25651185	g	NULL
rs32186996	1	178144418	2.92977e-08	Food Intake - Day 1	pmid25651185	g	NULL
rs32186996	1	178144418	7.12822e-09	Food Intake AVG - 4 Wks Diet	pmid25651185	g	NULL
rs32190671	1	172902741	6.70166e-08	KC	pmid26694027	pg/ml	NULL
rs32194602	1	181723723	2.48651e-09	Food Intake - Day 1	pmid25651185	g	NULL
rs32194602	1	181723723	1.43816e-07	BF	pmid25651185	%	(final % - initial %) / initial %
rs32194602	1	181723723	7.1111e-10	Food Intake AVG - 4 Wks Diet	pmid25651185	g	NULL
rs32197358	1	172748382	3.99239e-07	Food Intake - Day 1	pmid25651185	g	NULL
rs32197358	1	172748382	7.89856e-09	Food Intake AVG - 4 Wks Diet	pmid25651185	g	NULL
rs32197575	1	174919525	2.41797e-07	KC	pmid26694027	pg/ml	NULL
rs32197575	1	174919525	3.05029e-07	Food Intake - Day 3	pmid25651185	g	NULL
rs32198457	1	178805469	8.97289e-08	Food Intake - Day 1	pmid25651185	g	NULL
rs32198457	1	178805469	8.14165e-09	Food Intake AVG - 4 Wks Diet	pmid25651185	g	NULL
rs32198698	1	182314557	1.12362e-08	Food Intake - Day 1	pmid25651185	g	NULL
rs32198698	1	182314557	2.23801e-07	BF	pmid25651185	%	(final % - initial %) / initial %
rs32198698	1	182314557	8.90622e-10	Food Intake AVG - 4 Wks Diet	pmid25651185	g	NULL
rs32201293	1	135952005	6.09016e-08	MIP-1b	pmid26694027	pg/ml	NULL
rs32202532	1	182353576	8.36711e-07	Food Intake - Day 1	pmid25651185	g	NULL
rs32202532	1	182353576	2.6828e-07	Food Intake AVG - 4 Wks Diet	pmid25651185	g	NULL
rs32204626	1	185545755	5.89645e-07	unesterified cholesterol	pmid25480693	mg/dl	unesterified cholesterol
rs32205125	1	179408938	1.57353e-08	Food Intake - Day 1	pmid25651185	g	NULL
rs32205125	1	179408938	5.91016e-10	Food Intake AVG - 4 Wks Diet	pmid25651185	g	NULL
rs32210460	1	136590111	3.95877e-07	MIP-1b	pmid26694027	pg/ml	NULL
rs32213064	1	178309782	2.67484e-07	Food Intake - Day 1	pmid25651185	g	NULL
rs32213064	1	178309782	2.2606e-08	Food Intake AVG - 4 Wks Diet	pmid25651185	g	NULL
rs32221210	1	181745948	2.48651e-09	Food Intake - Day 1	pmid25651185	g	NULL
rs32221210	1	181745948	1.43816e-07	BF	pmid25651185	%	(final % - initial %) / initial %
rs32221210	1	181745948	7.1111e-10	Food Intake AVG - 4 Wks Diet	pmid25651185	g	NULL
rs32223846	1	179194757	1.20115e-07	Food Intake - Day 1	pmid25651185	g	NULL
rs32223846	1	179194757	6.0668e-10	Food Intake AVG - 4 Wks Diet	pmid25651185	g	NULL
rs32226370	1	179772236	1.21003e-07	Food Intake - Day 1	pmid25651185	g	NULL
rs32226370	1	179772236	9.63776e-09	Food Intake AVG - 4 Wks Diet	pmid25651185	g	NULL
rs32227485	1	179059808	1.31659e-07	Food Intake - Day 1	pmid25651185	g	NULL
rs32227485	1	179059808	1.85557e-09	Food Intake AVG - 4 Wks Diet	pmid25651185	g	NULL
rs32230113	1	172900130	5.7659e-08	KC	pmid26694027	pg/ml	NULL
rs32232644	1	136796684	1.55062e-07	MIP-1b	pmid26694027	pg/ml	NULL
rs32232782	1	181960444	7.72074e-09	Food Intake - Day 1	pmid25651185	g	NULL
rs32232782	1	181960444	7.99411e-08	BF	pmid25651185	%	(final % - initial %) / initial %
rs32232782	1	181960444	1.84439e-09	Food Intake AVG - 4 Wks Diet	pmid25651185	g	NULL
rs32236185	1	178918510	4.56009e-09	Food Intake - Day 1	pmid25651185	g	NULL
rs32236185	1	178918510	2.92488e-10	Food Intake AVG - 4 Wks Diet	pmid25651185	g	NULL
rs32238817	1	181642631	2.48651e-09	Food Intake - Day 1	pmid25651185	g	NULL
rs32238817	1	181642631	1.43816e-07	BF	pmid25651185	%	(final % - initial %) / initial %
rs32238817	1	181642631	7.1111e-10	Food Intake AVG - 4 Wks Diet	pmid25651185	g	NULL
rs32240147	1	172566348	1.14413e-08	Food Intake AVG - 4 Wks Diet	pmid25651185	g	NULL
rs32240276	1	178593535	1.85402e-09	Food Intake - Day 1	pmid25651185	g	NULL
rs32240276	1	178593535	3.60276e-10	Food Intake AVG - 4 Wks Diet	pmid25651185	g	NULL
rs32241966	1	176790795	7.79137e-07	Food Intake - Day 1	pmid25651185	g	NULL
rs32241966	1	176790795	4.39776e-07	Food Intake AVG - 4 Wks Diet	pmid25651185	g	NULL
rs32245773	1	172742472	3.42802e-07	Food Intake AVG - 4 Wks Diet	pmid25651185	g	NULL
rs32250012	1	176487232	5.68756e-09	Food Intake - Day 1	pmid25651185	g	NULL
rs32250012	1	176487232	4.93155e-11	Food Intake AVG - 4 Wks Diet	pmid25651185	g	NULL
rs32252167	1	181184607	8.02801e-07	Food Intake AVG - 4 Wks Diet	pmid25651185	g	NULL
rs32252167	1	181184607	7.06109e-07	Food Intake - Day 3	pmid25651185	g	NULL
rs32253973	1	182045631	7.68177e-09	Food Intake - Day 1	pmid25651185	g	NULL
rs32253973	1	182045631	9.23473e-08	BF	pmid25651185	%	(final % - initial %) / initial %
rs32253973	1	182045631	1.73387e-09	Food Intake AVG - 4 Wks Diet	pmid25651185	g	NULL
rs32257630	1	176698973	9.23327e-08	HDL	pmid20054062	mg/dl	NULL
rs32257630	1	176698973	1.57377e-07	total cholesterol	pmid20054062	mg/dl	NULL
rs32268043	1	176437033	4.06552e-08	Food Intake - Day 1	pmid25651185	g	NULL
rs32268043	1	176437033	4.30684e-10	Food Intake AVG - 4 Wks Diet	pmid25651185	g	NULL
rs32272691	1	124936405	7.43082e-07	left ventricle mass/body weight	pmid25480693	NULL	left ventricle mass/body weight
rs32277094	1	21648442	7.07852e-07	Velocity of circumferential shortening (day 7)	pmid25480693	%/ms	Velocity of circumferential shortening
rs32280136	1	180156619	1.15989e-08	Food Intake - Day 1	pmid25651185	g	NULL
rs32280136	1	180156619	3.14905e-09	Food Intake AVG - 4 Wks Diet	pmid25651185	g	NULL
rs32280351	1	180780767	4.6586e-08	Food Intake - Day 1	pmid25651185	g	NULL
rs32280351	1	180780767	4.11393e-07	BF	pmid25651185	%	(final % - initial %) / initial %
rs32280351	1	180780767	5.58282e-09	Food Intake AVG - 4 Wks Diet	pmid25651185	g	NULL
rs32280675	1	178298128	5.13677e-07	FatMass	pmid25651185	%	NULL
rs32280675	1	178298128	1.54843e-08	SAC weight	pmid25651185	g	NULL
rs32280675	1	178298128	7.25848e-08	NMR	pmid25651185	g	NULL
rs32280675	1	178298128	8.08123e-07	NMR Lean Mass 0 wks diet	pmid25651185	g	NULL
rs32280675	1	178298128	7.42175e-07	NMR Lean Mass 8 wks diet	pmid25651185	g	NULL
rs32280675	1	178298128	3.13238e-07	FatMass	pmid25651185	g	NULL
rs32280675	1	178298128	3.63092e-16	Food Intake - Day 1	pmid25651185	g	NULL
rs32280675	1	178298128	4.77012e-09	BF	pmid25651185	%	(final % - initial %) / initial %
rs32280675	1	178298128	5.69171e-14	Food Intake AVG - 4 Wks Diet	pmid25651185	g	NULL
rs32280675	1	178298128	2.58055e-10	Weight-8 wks diet	pmid25651185	g	NULL
rs32285841	1	161841354	1.04749e-07	total cholesterol	pmid20054062	mg/dl	NULL
rs32285841	1	161841354	5.59535e-07	HDL	pmid20054062	mg/dl	NULL
rs32287978	1	178363113	1.61048e-07	Food Intake - Day 1	pmid25651185	g	NULL
rs32287978	1	178363113	9.03192e-09	Food Intake AVG - 4 Wks Diet	pmid25651185	g	NULL
rs32292483	1	179323984	1.20115e-07	Food Intake - Day 1	pmid25651185	g	NULL
rs32292483	1	179323984	6.0668e-10	Food Intake AVG - 4 Wks Diet	pmid25651185	g	NULL
rs32293708	1	175984016	9.88302e-07	Food Intake - Day 1	pmid25651185	g	NULL
rs32296943	1	175588323	8.77482e-07	Food Intake - Day 1	pmid25651185	g	NULL
rs32297073	1	178800964	3.82522e-08	Food Intake - Day 1	pmid25651185	g	NULL
rs32297073	1	178800964	9.18926e-09	Food Intake AVG - 4 Wks Diet	pmid25651185	g	NULL
rs32297231	1	181960316	7.68177e-09	Food Intake - Day 1	pmid25651185	g	NULL
rs32297231	1	181960316	9.23473e-08	BF	pmid25651185	%	(final % - initial %) / initial %
rs32297231	1	181960316	1.73387e-09	Food Intake AVG - 4 Wks Diet	pmid25651185	g	NULL
rs32297507	1	175871578	2.8358e-09	KC	pmid26694027	pg/ml	NULL
rs32297507	1	175871578	3.46131e-07	Food Intake AVG - 4 Wks Diet	pmid25651185	g	NULL
rs32297507	1	175871578	1.73425e-07	Food Intake - Day 3	pmid25651185	g	NULL
rs32297599	1	179141174	1.52048e-09	Food Intake - Day 1	pmid25651185	g	NULL
rs32297599	1	179141174	3.28357e-10	Food Intake AVG - 4 Wks Diet	pmid25651185	g	NULL
rs32299114	1	177424961	2.8738e-07	Food Intake - Day 1	pmid25651185	g	NULL
rs32299114	1	177424961	1.44782e-08	Food Intake AVG - 4 Wks Diet	pmid25651185	g	NULL
rs32303070	1	178221608	2.92977e-08	Food Intake - Day 1	pmid25651185	g	NULL
rs32303070	1	178221608	7.12822e-09	Food Intake AVG - 4 Wks Diet	pmid25651185	g	NULL
rs32309179	1	180891767	2.48651e-09	Food Intake - Day 1	pmid25651185	g	NULL
rs32309179	1	180891767	1.43816e-07	BF	pmid25651185	%	(final % - initial %) / initial %
rs32309179	1	180891767	7.1111e-10	Food Intake AVG - 4 Wks Diet	pmid25651185	g	NULL
rs32314129	1	178310969	2.67484e-07	Food Intake - Day 1	pmid25651185	g	NULL
rs32314129	1	178310969	2.2606e-08	Food Intake AVG - 4 Wks Diet	pmid25651185	g	NULL
rs32316569	1	175768939	7.08732e-07	Food Intake - Day 2	pmid25651185	g	NULL
rs32316569	1	175768939	5.46499e-09	Food Intake AVG - 4 Wks Diet	pmid25651185	g	NULL
rs32316569	1	175768939	7.87733e-09	Food Intake - Day 3	pmid25651185	g	NULL
rs32318319	1	180577650	2.48651e-09	Food Intake - Day 1	pmid25651185	g	NULL
rs32318319	1	180577650	1.43816e-07	BF	pmid25651185	%	(final % - initial %) / initial %
rs32318319	1	180577650	7.1111e-10	Food Intake AVG - 4 Wks Diet	pmid25651185	g	NULL
rs32324714	1	180996731	7.68062e-09	Food Intake - Day 1	pmid25651185	g	NULL
rs32324714	1	180996731	2.37554e-08	BF	pmid25651185	%	(final % - initial %) / initial %
rs32324714	1	180996731	6.62986e-10	Food Intake AVG - 4 Wks Diet	pmid25651185	g	NULL
rs32325723	1	172018615	2.83011e-07	KC	pmid26694027	pg/ml	NULL
rs32328170	1	180573234	2.48651e-09	Food Intake - Day 1	pmid25651185	g	NULL
rs32328170	1	180573234	1.43816e-07	BF	pmid25651185	%	(final % - initial %) / initial %
rs32328170	1	180573234	7.1111e-10	Food Intake AVG - 4 Wks Diet	pmid25651185	g	NULL
rs32332393	1	34430864	1.08356e-08	Food Intake - Day 1	pmid25651185	g	NULL
rs32332945	1	176698760	8.14874e-07	total cholesterol	pmid20054062	mg/dl	NULL
rs32334175	1	175056753	8.10648e-10	KC	pmid26694027	pg/ml	NULL
rs32334175	1	175056753	6.44198e-07	Food Intake - Day 3	pmid25651185	g	NULL
rs32334586	1	179106887	1.0839e-07	Food Intake - Day 1	pmid25651185	g	NULL
rs32334586	1	179106887	9.43659e-10	Food Intake AVG - 4 Wks Diet	pmid25651185	g	NULL
rs32336340	1	189816622	6.87887e-07	total cholesterol	pmid25480693	mg/dl	total cholesterol
rs32349548	1	176988034	4.30747e-07	Food Intake - Day 1	pmid25651185	g	NULL
rs32349548	1	176988034	8.48285e-07	Food Intake AVG - 4 Wks Diet	pmid25651185	g	NULL
rs32350167	1	178928081	4.56009e-09	Food Intake - Day 1	pmid25651185	g	NULL
rs32350167	1	178928081	2.92488e-10	Food Intake AVG - 4 Wks Diet	pmid25651185	g	NULL
rs32357489	1	178666091	2.75179e-08	Food Intake - Day 1	pmid25651185	g	NULL
rs32357489	1	178666091	2.06166e-09	Food Intake AVG - 4 Wks Diet	pmid25651185	g	NULL
rs32358352	1	181642968	2.48651e-09	Food Intake - Day 1	pmid25651185	g	NULL
rs32358352	1	181642968	1.43816e-07	BF	pmid25651185	%	(final % - initial %) / initial %
rs32358352	1	181642968	7.1111e-10	Food Intake AVG - 4 Wks Diet	pmid25651185	g	NULL
rs32363394	1	172893884	3.52797e-08	KC	pmid26694027	pg/ml	NULL
rs32364386	1	136425888	5.09807e-09	MIP-1b	pmid26694027	pg/ml	NULL
rs32368915	1	181785866	7.68177e-09	Food Intake - Day 1	pmid25651185	g	NULL
rs32368915	1	181785866	9.23473e-08	BF	pmid25651185	%	(final % - initial %) / initial %
rs32368915	1	181785866	1.73387e-09	Food Intake AVG - 4 Wks Diet	pmid25651185	g	NULL
rs32371328	1	179857951	2.42286e-09	Food Intake - Day 1	pmid25651185	g	NULL
rs32371328	1	179857951	1.68436e-10	Food Intake AVG - 4 Wks Diet	pmid25651185	g	NULL
rs32372814	1	182143901	9.23432e-07	Food Intake - Day 3	pmid25651185	g	NULL
rs32373345	1	172955306	1.25586e-10	KC	pmid26694027	pg/ml	NULL
rs32376129	1	178705492	8.97289e-08	Food Intake - Day 1	pmid25651185	g	NULL
rs32376129	1	178705492	8.14165e-09	Food Intake AVG - 4 Wks Diet	pmid25651185	g	NULL
rs32377314	1	180193714	5.38993e-08	Food Intake - Day 1	pmid25651185	g	NULL
rs32377314	1	180193714	2.13093e-08	Food Intake AVG - 4 Wks Diet	pmid25651185	g	NULL
rs32378795	1	178839449	1.52048e-09	Food Intake - Day 1	pmid25651185	g	NULL
rs32378795	1	178839449	3.28357e-10	Food Intake AVG - 4 Wks Diet	pmid25651185	g	NULL
rs32380134	1	179994547	9.99362e-07	Food Intake AVG - 4 Wks Diet	pmid25651185	g	NULL
rs32380134	1	179994547	5.05454e-07	Food Intake - Day 3	pmid25651185	g	NULL
rs32386407	1	178318168	9.75393e-07	Food Intake - Day 1	pmid25651185	g	NULL
rs32386407	1	178318168	1.57891e-07	Food Intake AVG - 4 Wks Diet	pmid25651185	g	NULL
rs32387312	1	178722719	1.52048e-09	Food Intake - Day 1	pmid25651185	g	NULL
rs32387312	1	178722719	3.28357e-10	Food Intake AVG - 4 Wks Diet	pmid25651185	g	NULL
rs32392252	1	173072867	4.0092e-11	KC	pmid26694027	pg/ml	NULL
rs32392571	1	179237626	4.56009e-09	Food Intake - Day 1	pmid25651185	g	NULL
rs32392571	1	179237626	2.92488e-10	Food Intake AVG - 4 Wks Diet	pmid25651185	g	NULL
rs32393559	1	177335472	3.95613e-07	Food Intake - Day 1	pmid25651185	g	NULL
rs32393559	1	177335472	9.4255e-07	Food Intake AVG - 4 Wks Diet	pmid25651185	g	NULL
rs32401210	1	177127022	8.06924e-09	Food Intake - Day 1	pmid25651185	g	NULL
rs32401210	1	177127022	1.52466e-10	Food Intake AVG - 4 Wks Diet	pmid25651185	g	NULL
rs32402722	1	175750802	5.68756e-09	Food Intake - Day 1	pmid25651185	g	NULL
rs32402722	1	175750802	4.93155e-11	Food Intake AVG - 4 Wks Diet	pmid25651185	g	NULL
rs32408862	1	174902526	9.99174e-10	KC	pmid26694027	pg/ml	NULL
rs32408862	1	174902526	3.72224e-07	Food Intake - Day 3	pmid25651185	g	NULL
rs32412179	1	175348645	3.58128e-07	Food Intake AVG - 4 Wks Diet	pmid25651185	g	NULL
rs32412179	1	175348645	3.34917e-07	Food Intake - Day 3	pmid25651185	g	NULL
rs32412634	1	136509968	5.09807e-09	MIP-1b	pmid26694027	pg/ml	NULL
rs32420457	1	177743059	2.1961e-08	Food Intake - Day 1	pmid25651185	g	NULL
rs32420457	1	177743059	2.58724e-09	Food Intake AVG - 4 Wks Diet	pmid25651185	g	NULL
rs32433521	1	180588905	2.72643e-09	Food Intake - Day 1	pmid25651185	g	NULL
rs32433521	1	180588905	1.81138e-07	BF	pmid25651185	%	(final % - initial %) / initial %
rs32433521	1	180588905	7.86782e-10	Food Intake AVG - 4 Wks Diet	pmid25651185	g	NULL
rs32434252	1	180395558	6.87085e-08	Food Intake - Day 1	pmid25651185	g	NULL
rs32434252	1	180395558	8.31252e-07	BF	pmid25651185	%	(final % - initial %) / initial %
rs32434252	1	180395558	8.27871e-09	Food Intake AVG - 4 Wks Diet	pmid25651185	g	NULL
rs32434599	1	177888137	7.59555e-09	Food Intake - Day 1	pmid25651185	g	NULL
rs32434599	1	177888137	6.70531e-10	Food Intake AVG - 4 Wks Diet	pmid25651185	g	NULL
rs32446684	1	179324297	5.99836e-09	Food Intake - Day 1	pmid25651185	g	NULL
rs32446684	1	179324297	6.64686e-10	Food Intake AVG - 4 Wks Diet	pmid25651185	g	NULL
rs32450719	1	179026784	6.23938e-09	Food Intake - Day 1	pmid25651185	g	NULL
rs32450719	1	179026784	2.03853e-09	Food Intake AVG - 4 Wks Diet	pmid25651185	g	NULL
rs32451525	1	173167535	7.20322e-07	Food Intake - Day 1	pmid25651185	g	NULL
rs32451525	1	173167535	3.89711e-08	Food Intake AVG - 4 Wks Diet	pmid25651185	g	NULL
rs32454830	1	176986726	4.30747e-07	Food Intake - Day 1	pmid25651185	g	NULL
rs32454830	1	176986726	8.48285e-07	Food Intake AVG - 4 Wks Diet	pmid25651185	g	NULL
rs32459831	1	181977343	7.68177e-09	Food Intake - Day 1	pmid25651185	g	NULL
rs32459831	1	181977343	9.23473e-08	BF	pmid25651185	%	(final % - initial %) / initial %
rs32459831	1	181977343	1.73387e-09	Food Intake AVG - 4 Wks Diet	pmid25651185	g	NULL
rs32459963	1	174873613	8.37145e-08	KC	pmid26694027	pg/ml	NULL
rs32459963	1	174873613	4.35537e-07	Food Intake - Day 3	pmid25651185	g	NULL
rs32462147	1	175425558	4.5782e-09	KC	pmid26694027	pg/ml	NULL
rs32462147	1	175425558	5.24946e-07	Food Intake - Day 3	pmid25651185	g	NULL
rs32468187	1	175027273	7.66919e-09	KC	pmid26694027	pg/ml	NULL
rs32468312	1	174861038	2.76394e-10	KC	pmid26694027	pg/ml	NULL
rs32468312	1	174861038	4.67361e-07	Food Intake - Day 3	pmid25651185	g	NULL
rs32474016	1	180713824	8.06106e-07	Food Intake AVG - 4 Wks Diet	pmid25651185	g	NULL
rs32474016	1	180713824	7.57656e-07	Food Intake - Day 3	pmid25651185	g	NULL
rs32476379	1	178781600	1.52048e-09	Food Intake - Day 1	pmid25651185	g	NULL
rs32476379	1	178781600	3.28357e-10	Food Intake AVG - 4 Wks Diet	pmid25651185	g	NULL
rs32476667	1	181364151	8.06106e-07	Food Intake AVG - 4 Wks Diet	pmid25651185	g	NULL
rs32476667	1	181364151	7.57656e-07	Food Intake - Day 3	pmid25651185	g	NULL
rs32479506	1	174621837	2.82713e-08	Food Intake AVG - 4 Wks Diet	pmid25651185	g	NULL
rs32483525	1	177320664	7.79137e-07	Food Intake - Day 1	pmid25651185	g	NULL
rs32483525	1	177320664	4.39776e-07	Food Intake AVG - 4 Wks Diet	pmid25651185	g	NULL
rs32491440	1	177169183	2.72556e-08	Food Intake - Day 1	pmid25651185	g	NULL
rs32491440	1	177169183	5.62581e-10	Food Intake AVG - 4 Wks Diet	pmid25651185	g	NULL
rs32495117	1	177013324	5.02847e-08	Food Intake - Day 1	pmid25651185	g	NULL
rs32495117	1	177013324	9.13611e-10	Food Intake AVG - 4 Wks Diet	pmid25651185	g	NULL
rs32497097	1	136875167	1.55062e-07	MIP-1b	pmid26694027	pg/ml	NULL
rs32498410	1	174537391	9.6238e-07	Food Intake - Day 1	pmid25651185	g	NULL
rs32498410	1	174537391	2.21349e-08	Food Intake AVG - 4 Wks Diet	pmid25651185	g	NULL
rs32502623	1	180431836	1.00813e-07	Food Intake - Day 1	pmid25651185	g	NULL
rs32502623	1	180431836	4.19054e-09	Food Intake AVG - 4 Wks Diet	pmid25651185	g	NULL
rs32503022	1	175874903	1.03625e-07	Food Intake AVG - 4 Wks Diet	pmid25651185	g	NULL
rs32503022	1	175874903	1.22548e-07	Food Intake - Day 3	pmid25651185	g	NULL
rs32506044	1	175533715	7.75961e-07	HDL	pmid20054062	mg/dl	NULL
rs32507801	1	175762703	2.92478e-08	Food Intake - Day 1	pmid25651185	g	NULL
rs32507801	1	175762703	6.62453e-10	Food Intake AVG - 4 Wks Diet	pmid25651185	g	NULL
rs32523846	1	175394932	4.5782e-09	KC	pmid26694027	pg/ml	NULL
rs32523846	1	175394932	5.24946e-07	Food Intake - Day 3	pmid25651185	g	NULL
rs32524015	1	179085366	5.18421e-07	Food Intake - Day 1	pmid25651185	g	NULL
rs32524015	1	179085366	1.50675e-08	Food Intake AVG - 4 Wks Diet	pmid25651185	g	NULL
rs32525442	1	175421197	4.5782e-09	KC	pmid26694027	pg/ml	NULL
rs32525754	1	175345728	4.23891e-07	Food Intake AVG - 4 Wks Diet	pmid25651185	g	NULL
rs32525754	1	175345728	4.86203e-07	Food Intake - Day 3	pmid25651185	g	NULL
rs32526726	1	175385365	9.12648e-08	KC	pmid26694027	pg/ml	NULL
rs32526726	1	175385365	9.68679e-07	Food Intake AVG - 4 Wks Diet	pmid25651185	g	NULL
rs32526726	1	175385365	1.22354e-07	Food Intake - Day 3	pmid25651185	g	NULL
rs32526876	1	175510225	3.19857e-08	Food Intake - Day 1	pmid25651185	g	NULL
rs32526876	1	175510225	5.31905e-10	Food Intake AVG - 4 Wks Diet	pmid25651185	g	NULL
rs32526877	1	175510346	2.00544e-07	Food Intake - Day 1	pmid25651185	g	NULL
rs32526877	1	175510346	3.33389e-09	Food Intake AVG - 4 Wks Diet	pmid25651185	g	NULL
rs32526879	1	175510543	2.00544e-07	Food Intake - Day 1	pmid25651185	g	NULL
rs32526879	1	175510543	3.33389e-09	Food Intake AVG - 4 Wks Diet	pmid25651185	g	NULL
rs32527270	1	175348591	9.65773e-10	KC	pmid26694027	pg/ml	NULL
rs32527273	1	175349177	3.23389e-07	Food Intake AVG - 4 Wks Diet	pmid25651185	g	NULL
rs32527273	1	175349177	3.69224e-07	Food Intake - Day 3	pmid25651185	g	NULL
rs32527734	1	175427515	4.5782e-09	KC	pmid26694027	pg/ml	NULL
rs32527734	1	175427515	5.24946e-07	Food Intake - Day 3	pmid25651185	g	NULL
rs32527736	1	175427923	8.0194e-09	KC	pmid26694027	pg/ml	NULL
rs32527736	1	175427923	2.53709e-07	Food Intake - Day 3	pmid25651185	g	NULL
rs32528114	1	175349305	2.70719e-10	KC	pmid26694027	pg/ml	NULL
rs32528114	1	175349305	2.63689e-07	Food Intake - Day 3	pmid25651185	g	NULL
rs32528115	1	175349817	3.16396e-09	KC	pmid26694027	pg/ml	NULL
rs32528208	1	175387625	6.45904e-08	KC	pmid26694027	pg/ml	NULL
rs32528208	1	175387625	6.18662e-07	Food Intake AVG - 4 Wks Diet	pmid25651185	g	NULL
rs32528208	1	175387625	9.23658e-08	Food Intake - Day 3	pmid25651185	g	NULL
rs32528416	1	175440001	4.5782e-09	KC	pmid26694027	pg/ml	NULL
rs32528416	1	175440001	5.24946e-07	Food Intake - Day 3	pmid25651185	g	NULL
rs32528419	1	175440535	5.05397e-09	KC	pmid26694027	pg/ml	NULL
rs32528419	1	175440535	9.64217e-07	Food Intake - Day 3	pmid25651185	g	NULL
rs32530494	1	175391720	1.07383e-08	KC	pmid26694027	pg/ml	NULL
rs32530494	1	175391720	4.85086e-07	Food Intake - Day 3	pmid25651185	g	NULL
rs32530786	1	175513768	1.94317e-07	Food Intake - Day 1	pmid25651185	g	NULL
rs32530786	1	175513768	3.8735e-09	Food Intake AVG - 4 Wks Diet	pmid25651185	g	NULL
rs32530854	1	175456282	3.91852e-08	KC	pmid26694027	pg/ml	NULL
rs32530854	1	175456282	5.95933e-07	Food Intake - Day 3	pmid25651185	g	NULL
rs32530857	1	175461843	7.74393e-08	KC	pmid26694027	pg/ml	NULL
rs32530857	1	175461843	8.97202e-07	Food Intake AVG - 4 Wks Diet	pmid25651185	g	NULL
rs32530857	1	175461843	1.36357e-07	Food Intake - Day 3	pmid25651185	g	NULL
rs32531908	1	182115324	9.70107e-07	FatMass	pmid25651185	%	NULL
rs32531908	1	182115324	2.55313e-08	Food Intake - Day 1	pmid25651185	g	NULL
rs32531908	1	182115324	7.63301e-09	BF	pmid25651185	%	(final % - initial %) / initial %
rs32531908	1	182115324	3.91103e-09	Food Intake AVG - 4 Wks Diet	pmid25651185	g	NULL
rs32532323	1	175573816	6.53154e-07	Food Intake - Day 1	pmid25651185	g	NULL
rs32534178	1	175550942	5.90214e-07	Food Intake - Day 1	pmid25651185	g	NULL
rs32537266	1	171778416	2.83011e-07	KC	pmid26694027	pg/ml	NULL
rs32538396	1	174941203	1.3561e-07	Food Intake AVG - 4 Wks Diet	pmid25651185	g	NULL
rs32538396	1	174941203	1.28217e-07	Food Intake - Day 3	pmid25651185	g	NULL
rs32539542	1	178775175	2.18026e-08	Food Intake - Day 1	pmid25651185	g	NULL
rs32539542	1	178775175	2.43539e-09	Food Intake AVG - 4 Wks Diet	pmid25651185	g	NULL
rs32541034	1	175764092	5.68756e-09	Food Intake - Day 1	pmid25651185	g	NULL
rs32541034	1	175764092	4.93155e-11	Food Intake AVG - 4 Wks Diet	pmid25651185	g	NULL
rs32542596	1	175767354	5.68756e-09	Food Intake - Day 1	pmid25651185	g	NULL
rs32542596	1	175767354	4.93155e-11	Food Intake AVG - 4 Wks Diet	pmid25651185	g	NULL
rs32543294	1	177171958	1.34956e-08	Food Intake - Day 1	pmid25651185	g	NULL
rs32543294	1	177171958	4.21007e-10	Food Intake AVG - 4 Wks Diet	pmid25651185	g	NULL
rs32546613	1	136326087	5.09807e-09	MIP-1b	pmid26694027	pg/ml	NULL
rs32548035	1	179076764	1.52048e-09	Food Intake - Day 1	pmid25651185	g	NULL
rs32548035	1	179076764	3.28357e-10	Food Intake AVG - 4 Wks Diet	pmid25651185	g	NULL
rs32552230	1	176044611	6.34231e-09	Food Intake AVG - 4 Wks Diet	pmid25651185	g	NULL
rs32552231	1	176044641	1.91971e-07	Food Intake - Day 1	pmid25651185	g	NULL
rs32552231	1	176044641	1.07087e-09	Food Intake AVG - 4 Wks Diet	pmid25651185	g	NULL
rs32552811	1	176112533	3.43463e-07	total cholesterol	pmid20054062	mg/dl	NULL
rs32552811	1	176112533	4.74554e-08	HDL	pmid20054062	mg/dl	NULL
rs32552945	1	176092628	1.2674e-08	Food Intake AVG - 4 Wks Diet	pmid25651185	g	NULL
rs32553810	1	176095672	6.77559e-07	Food Intake AVG - 4 Wks Diet	pmid25651185	g	NULL
rs32553980	1	176173708	5.07647e-08	Food Intake AVG - 4 Wks Diet	pmid25651185	g	NULL
rs32554059	1	176070502	8.34857e-09	Food Intake AVG - 4 Wks Diet	pmid25651185	g	NULL
rs32554235	1	176047288	4.06552e-08	Food Intake - Day 1	pmid25651185	g	NULL
rs32554235	1	176047288	4.30684e-10	Food Intake AVG - 4 Wks Diet	pmid25651185	g	NULL
rs32554514	1	176096092	1.2674e-08	Food Intake AVG - 4 Wks Diet	pmid25651185	g	NULL
rs32555370	1	176098468	9.64721e-09	Food Intake AVG - 4 Wks Diet	pmid25651185	g	NULL
rs32555371	1	176098531	1.2674e-08	Food Intake AVG - 4 Wks Diet	pmid25651185	g	NULL
rs32555564	1	176116521	7.88979e-07	Food Intake - Day 1	pmid25651185	g	NULL
rs32555564	1	176116521	3.88995e-09	Food Intake AVG - 4 Wks Diet	pmid25651185	g	NULL
rs32555997	1	176073089	3.67925e-08	Food Intake - Day 1	pmid25651185	g	NULL
rs32555997	1	176073089	2.71991e-10	Food Intake AVG - 4 Wks Diet	pmid25651185	g	NULL
rs32556540	1	176000203	3.70353e-07	Food Intake - Day 1	pmid25651185	g	NULL
rs32556540	1	176000203	2.92178e-09	Food Intake AVG - 4 Wks Diet	pmid25651185	g	NULL
rs32556555	1	176073761	4.06552e-08	Food Intake - Day 1	pmid25651185	g	NULL
rs32556555	1	176073761	4.30684e-10	Food Intake AVG - 4 Wks Diet	pmid25651185	g	NULL
rs32556921	1	177129130	8.06924e-09	Food Intake - Day 1	pmid25651185	g	NULL
rs32556921	1	177129130	1.52466e-10	Food Intake AVG - 4 Wks Diet	pmid25651185	g	NULL
rs32557127	1	174149042	4.30366e-07	KC	pmid26694027	pg/ml	NULL
rs32557425	1	179398265	1.52048e-09	Food Intake - Day 1	pmid25651185	g	NULL
rs32557425	1	179398265	3.28357e-10	Food Intake AVG - 4 Wks Diet	pmid25651185	g	NULL
rs32559031	1	176171541	7.60588e-07	Food Intake AVG - 4 Wks Diet	pmid25651185	g	NULL
rs32559774	1	176205262	2.44677e-09	KC	pmid26694027	pg/ml	NULL
rs32560479	1	176254129	2.20773e-08	Food Intake - Day 1	pmid25651185	g	NULL
rs32560479	1	176254129	1.24121e-07	Food Intake AVG - 4 Wks Diet	pmid25651185	g	NULL
rs32560843	1	176186289	3.30097e-09	Food Intake AVG - 4 Wks Diet	pmid25651185	g	NULL
rs32566243	1	176335025	1.85134e-07	Food Intake - Day 1	pmid25651185	g	NULL
rs32566243	1	176335025	4.26406e-07	Food Intake AVG - 4 Wks Diet	pmid25651185	g	NULL
rs32567311	1	173252655	4.0092e-11	KC	pmid26694027	pg/ml	NULL
rs32569889	1	176378714	1.0679e-07	Food Intake - Day 1	pmid25651185	g	NULL
rs32569889	1	176378714	2.36132e-07	Food Intake AVG - 4 Wks Diet	pmid25651185	g	NULL
rs32571369	1	179240875	1.57353e-08	Food Intake - Day 1	pmid25651185	g	NULL
rs32571369	1	179240875	5.91016e-10	Food Intake AVG - 4 Wks Diet	pmid25651185	g	NULL
rs32571823	1	168533039	3.42302e-07	HDL	pmid20054062	mg/dl	NULL
rs32571823	1	168533039	4.69033e-07	total cholesterol	pmid20054062	mg/dl	NULL
rs32572367	1	172169532	2.83011e-07	KC	pmid26694027	pg/ml	NULL
rs32575960	1	176458272	1.98332e-07	Food Intake - Day 1	pmid25651185	g	NULL
rs32575960	1	176458272	2.18533e-09	Food Intake AVG - 4 Wks Diet	pmid25651185	g	NULL
rs32577610	1	179062805	1.63793e-08	Food Intake - Day 1	pmid25651185	g	NULL
rs32577610	1	179062805	1.70295e-09	Food Intake AVG - 4 Wks Diet	pmid25651185	g	NULL
rs32578749	1	178532968	2.30529e-07	Food Intake - Day 1	pmid25651185	g	NULL
rs32578749	1	178532968	1.89661e-08	Food Intake AVG - 4 Wks Diet	pmid25651185	g	NULL
rs32579526	1	176455174	1.86807e-07	Food Intake - Day 1	pmid25651185	g	NULL
rs32579526	1	176455174	1.48904e-09	Food Intake AVG - 4 Wks Diet	pmid25651185	g	NULL
rs32580261	1	176486173	6.49008e-07	Food Intake AVG - 4 Wks Diet	pmid25651185	g	NULL
rs32580333	1	176457157	1.98332e-07	Food Intake - Day 1	pmid25651185	g	NULL
rs32580333	1	176457157	2.18533e-09	Food Intake AVG - 4 Wks Diet	pmid25651185	g	NULL
rs32581190	1	176457683	1.98332e-07	Food Intake - Day 1	pmid25651185	g	NULL
rs32581190	1	176457683	2.18533e-09	Food Intake AVG - 4 Wks Diet	pmid25651185	g	NULL
rs32581642	1	177311194	7.79137e-07	Food Intake - Day 1	pmid25651185	g	NULL
rs32581642	1	177311194	4.39776e-07	Food Intake AVG - 4 Wks Diet	pmid25651185	g	NULL
rs32582416	1	176779378	7.79137e-07	Food Intake - Day 1	pmid25651185	g	NULL
rs32582416	1	176779378	4.39776e-07	Food Intake AVG - 4 Wks Diet	pmid25651185	g	NULL
rs32585718	1	176615115	5.73367e-09	Food Intake AVG - 4 Wks Diet	pmid25651185	g	NULL
rs32586294	1	176613011	1.10328e-08	Food Intake AVG - 4 Wks Diet	pmid25651185	g	NULL
rs32586542	1	181818771	7.68177e-09	Food Intake - Day 1	pmid25651185	g	NULL
rs32586542	1	181818771	9.23473e-08	BF	pmid25651185	%	(final % - initial %) / initial %
rs32586542	1	181818771	1.73387e-09	Food Intake AVG - 4 Wks Diet	pmid25651185	g	NULL
rs32587310	1	176615703	1.10328e-08	Food Intake AVG - 4 Wks Diet	pmid25651185	g	NULL
rs32587313	1	176615780	1.10328e-08	Food Intake AVG - 4 Wks Diet	pmid25651185	g	NULL
rs32587785	1	178465794	1.90215e-09	Food Intake - Day 1	pmid25651185	g	NULL
rs32587785	1	178465794	1.00108e-10	Food Intake AVG - 4 Wks Diet	pmid25651185	g	NULL
rs32589201	1	176569566	2.78028e-07	HDL	pmid20054062	mg/dl	NULL
rs32590746	1	176718729	6.98756e-09	Food Intake AVG - 4 Wks Diet	pmid25651185	g	NULL
rs32592307	1	176719817	6.98756e-09	Food Intake AVG - 4 Wks Diet	pmid25651185	g	NULL
rs32593106	1	176719937	6.98756e-09	Food Intake AVG - 4 Wks Diet	pmid25651185	g	NULL
rs32593486	1	176714309	4.51381e-07	Food Intake - Day 1	pmid25651185	g	NULL
rs32593486	1	176714309	1.04603e-09	Food Intake AVG - 4 Wks Diet	pmid25651185	g	NULL
rs32594410	1	176706951	4.51381e-07	Food Intake - Day 1	pmid25651185	g	NULL
rs32594410	1	176706951	1.04603e-09	Food Intake AVG - 4 Wks Diet	pmid25651185	g	NULL
rs32595958	1	178939291	1.52048e-09	Food Intake - Day 1	pmid25651185	g	NULL
rs32595958	1	178939291	3.28357e-10	Food Intake AVG - 4 Wks Diet	pmid25651185	g	NULL
rs32596213	1	179185021	3.21217e-08	Food Intake - Day 1	pmid25651185	g	NULL
rs32596213	1	179185021	9.74301e-10	Food Intake AVG - 4 Wks Diet	pmid25651185	g	NULL
rs32597475	1	176731858	4.51381e-07	Food Intake - Day 1	pmid25651185	g	NULL
rs32597475	1	176731858	1.04603e-09	Food Intake AVG - 4 Wks Diet	pmid25651185	g	NULL
rs32598023	1	176740778	8.34456e-07	total cholesterol	pmid20054062	mg/dl	NULL
rs32598328	1	177027584	8.7888e-09	Food Intake AVG - 4 Wks Diet	pmid25651185	g	NULL
rs32601567	1	179211599	1.96355e-08	Food Intake - Day 1	pmid25651185	g	NULL
rs32601567	1	179211599	9.22611e-10	Food Intake AVG - 4 Wks Diet	pmid25651185	g	NULL
rs32602446	1	179233406	2.13045e-09	Food Intake - Day 1	pmid25651185	g	NULL
rs32602446	1	179233406	5.58982e-10	Food Intake AVG - 4 Wks Diet	pmid25651185	g	NULL
rs32607981	1	43157744	4.90628e-07	Velocity of circumferential shortening (day 7)	pmid25480693	%/ms	Velocity of circumferential shortening
rs32609753	1	179303349	5.99836e-09	Food Intake - Day 1	pmid25651185	g	NULL
rs32609753	1	179303349	6.64686e-10	Food Intake AVG - 4 Wks Diet	pmid25651185	g	NULL
rs32609975	1	179274674	1.57353e-08	Food Intake - Day 1	pmid25651185	g	NULL
rs32609975	1	179274674	5.91016e-10	Food Intake AVG - 4 Wks Diet	pmid25651185	g	NULL
rs32610763	1	179292342	5.99836e-09	Food Intake - Day 1	pmid25651185	g	NULL
rs32610763	1	179292342	6.64686e-10	Food Intake AVG - 4 Wks Diet	pmid25651185	g	NULL
rs32612648	1	178791524	1.52048e-09	Food Intake - Day 1	pmid25651185	g	NULL
rs32612648	1	178791524	3.28357e-10	Food Intake AVG - 4 Wks Diet	pmid25651185	g	NULL
rs32619121	1	176853645	7.79137e-07	Food Intake - Day 1	pmid25651185	g	NULL
rs32619121	1	176853645	4.39776e-07	Food Intake AVG - 4 Wks Diet	pmid25651185	g	NULL
rs32619262	1	179380954	5.99836e-09	Food Intake - Day 1	pmid25651185	g	NULL
rs32619262	1	179380954	6.64686e-10	Food Intake AVG - 4 Wks Diet	pmid25651185	g	NULL
rs32619918	1	179381750	8.89375e-08	Food Intake - Day 1	pmid25651185	g	NULL
rs32619918	1	179381750	6.62052e-09	Food Intake AVG - 4 Wks Diet	pmid25651185	g	NULL
rs32620415	1	179100038	5.48221e-08	Food Intake - Day 1	pmid25651185	g	NULL
rs32620415	1	179100038	1.27567e-09	Food Intake AVG - 4 Wks Diet	pmid25651185	g	NULL
rs32620526	1	181595082	2.48651e-09	Food Intake - Day 1	pmid25651185	g	NULL
rs32620526	1	181595082	1.43816e-07	BF	pmid25651185	%	(final % - initial %) / initial %
rs32620526	1	181595082	7.1111e-10	Food Intake AVG - 4 Wks Diet	pmid25651185	g	NULL
rs32620812	1	179366343	9.02394e-09	Food Intake - Day 1	pmid25651185	g	NULL
rs32620812	1	179366343	9.01583e-10	Food Intake AVG - 4 Wks Diet	pmid25651185	g	NULL
rs32622094	1	179345832	7.70083e-08	Food Intake - Day 1	pmid25651185	g	NULL
rs32622094	1	179345832	1.07175e-08	Food Intake AVG - 4 Wks Diet	pmid25651185	g	NULL
rs32622096	1	179345980	5.99836e-09	Food Intake - Day 1	pmid25651185	g	NULL
rs32622096	1	179345980	6.64686e-10	Food Intake AVG - 4 Wks Diet	pmid25651185	g	NULL
rs32622471	1	176892217	1.34956e-08	Food Intake - Day 1	pmid25651185	g	NULL
rs32622471	1	176892217	4.21007e-10	Food Intake AVG - 4 Wks Diet	pmid25651185	g	NULL
rs32624870	1	173072839	4.0092e-11	KC	pmid26694027	pg/ml	NULL
rs32628095	1	136553892	1.02421e-10	MIP-1b	pmid26694027	pg/ml	NULL
rs32628184	1	181697914	3.905e-08	Food Intake - Day 1	pmid25651185	g	NULL
rs32628184	1	181697914	3.85371e-07	BF	pmid25651185	%	(final % - initial %) / initial %
rs32628184	1	181697914	2.37103e-09	Food Intake AVG - 4 Wks Diet	pmid25651185	g	NULL
rs32632656	1	176990970	5.89173e-07	Food Intake - Day 1	pmid25651185	g	NULL
rs32632656	1	176990970	1.25048e-09	Food Intake AVG - 4 Wks Diet	pmid25651185	g	NULL
rs32632984	1	179573301	1.52048e-09	Food Intake - Day 1	pmid25651185	g	NULL
rs32632984	1	179573301	3.28357e-10	Food Intake AVG - 4 Wks Diet	pmid25651185	g	NULL
rs32633892	1	181802185	7.68177e-09	Food Intake - Day 1	pmid25651185	g	NULL
rs32633892	1	181802185	9.23473e-08	BF	pmid25651185	%	(final % - initial %) / initial %
rs32633892	1	181802185	1.73387e-09	Food Intake AVG - 4 Wks Diet	pmid25651185	g	NULL
rs32636604	1	179477315	1.46621e-07	Food Intake - Day 1	pmid25651185	g	NULL
rs32636604	1	179477315	3.38274e-08	Food Intake AVG - 4 Wks Diet	pmid25651185	g	NULL
rs32636607	1	179477457	2.98941e-08	Food Intake - Day 1	pmid25651185	g	NULL
rs32636607	1	179477457	4.37846e-09	Food Intake AVG - 4 Wks Diet	pmid25651185	g	NULL
rs32637210	1	176873277	7.79137e-07	Food Intake - Day 1	pmid25651185	g	NULL
rs32637210	1	176873277	4.39776e-07	Food Intake AVG - 4 Wks Diet	pmid25651185	g	NULL
rs32638305	1	179558929	2.48925e-07	Food Intake - Day 1	pmid25651185	g	NULL
rs32638305	1	179558929	6.20473e-08	Food Intake AVG - 4 Wks Diet	pmid25651185	g	NULL
rs32639110	1	179577707	5.49995e-08	Food Intake - Day 1	pmid25651185	g	NULL
rs32639110	1	179577707	8.1817e-09	Food Intake AVG - 4 Wks Diet	pmid25651185	g	NULL
rs32639263	1	179615418	5.30894e-07	Food Intake - Day 1	pmid25651185	g	NULL
rs32639263	1	179615418	1.90918e-08	Food Intake AVG - 4 Wks Diet	pmid25651185	g	NULL
rs32642400	1	179605954	5.14437e-08	Food Intake - Day 1	pmid25651185	g	NULL
rs32642400	1	179605954	6.68996e-09	Food Intake AVG - 4 Wks Diet	pmid25651185	g	NULL
rs32643664	1	177128839	1.43168e-08	Food Intake - Day 1	pmid25651185	g	NULL
rs32643664	1	177128839	5.36533e-10	Food Intake AVG - 4 Wks Diet	pmid25651185	g	NULL
rs32646436	1	179624202	1.31659e-07	Food Intake - Day 1	pmid25651185	g	NULL
rs32646436	1	179624202	1.85557e-09	Food Intake AVG - 4 Wks Diet	pmid25651185	g	NULL
rs32647244	1	175187012	1.00965e-09	KC	pmid26694027	pg/ml	NULL
rs32647244	1	175187012	5.35219e-07	Food Intake - Day 3	pmid25651185	g	NULL
rs32647931	1	179683097	2.65981e-07	Food Intake - Day 1	pmid25651185	g	NULL
rs32647931	1	179683097	2.5184e-09	Food Intake AVG - 4 Wks Diet	pmid25651185	g	NULL
rs32649041	1	172012068	2.83011e-07	KC	pmid26694027	pg/ml	NULL
rs32650772	1	174675038	3.43889e-07	Food Intake AVG - 4 Wks Diet	pmid25651185	g	NULL
rs32650772	1	174675038	5.40241e-07	Food Intake - Day 3	pmid25651185	g	NULL
rs32650787	1	179699521	3.03302e-07	Food Intake - Day 1	pmid25651185	g	NULL
rs32650787	1	179699521	7.39012e-09	Food Intake AVG - 4 Wks Diet	pmid25651185	g	NULL
rs32652267	1	179700148	6.20102e-08	Food Intake AVG - 4 Wks Diet	pmid25651185	g	NULL
rs32652694	1	182302852	1.12362e-08	Food Intake - Day 1	pmid25651185	g	NULL
rs32652694	1	182302852	2.23801e-07	BF	pmid25651185	%	(final % - initial %) / initial %
rs32652694	1	182302852	8.90622e-10	Food Intake AVG - 4 Wks Diet	pmid25651185	g	NULL
rs32652700	1	136553770	6.33204e-11	MIP-1b	pmid26694027	pg/ml	NULL
rs32652867	1	181672069	4.56019e-11	Food Intake - Day 1	pmid25651185	g	NULL
rs32652867	1	181672069	1.07586e-08	BF	pmid25651185	%	(final % - initial %) / initial %
rs32652867	1	181672069	3.04508e-11	Food Intake AVG - 4 Wks Diet	pmid25651185	g	NULL
rs32653492	1	178553298	4.56009e-09	Food Intake - Day 1	pmid25651185	g	NULL
rs32653492	1	178553298	2.92488e-10	Food Intake AVG - 4 Wks Diet	pmid25651185	g	NULL
rs32654625	1	179742571	5.14437e-08	Food Intake - Day 1	pmid25651185	g	NULL
rs32654625	1	179742571	6.68996e-09	Food Intake AVG - 4 Wks Diet	pmid25651185	g	NULL
rs32657831	1	182299053	3.63536e-08	Food Intake - Day 1	pmid25651185	g	NULL
rs32657831	1	182299053	2.159e-07	BF	pmid25651185	%	(final % - initial %) / initial %
rs32657831	1	182299053	1.77366e-09	Food Intake AVG - 4 Wks Diet	pmid25651185	g	NULL
rs32657976	1	178341979	2.7963e-09	Food Intake - Day 1	pmid25651185	g	NULL
rs32657976	1	178341979	3.03001e-10	Food Intake AVG - 4 Wks Diet	pmid25651185	g	NULL
rs32662265	1	179994909	2.89837e-07	Food Intake - Day 3	pmid25651185	g	NULL
rs32662906	1	179932303	1.28994e-07	Food Intake - Day 1	pmid25651185	g	NULL
rs32662906	1	179932303	1.16317e-09	Food Intake AVG - 4 Wks Diet	pmid25651185	g	NULL
rs32665233	1	179969466	1.06356e-09	Food Intake - Day 1	pmid25651185	g	NULL
rs32665233	1	179969466	1.14197e-10	Food Intake AVG - 4 Wks Diet	pmid25651185	g	NULL
rs32665909	1	177427279	5.22392e-08	Food Intake - Day 1	pmid25651185	g	NULL
rs32665909	1	177427279	2.7412e-09	Food Intake AVG - 4 Wks Diet	pmid25651185	g	NULL
rs32667618	1	179966488	1.52048e-09	Food Intake - Day 1	pmid25651185	g	NULL
rs32667618	1	179966488	3.28357e-10	Food Intake AVG - 4 Wks Diet	pmid25651185	g	NULL
rs32668729	1	180040678	1.28994e-07	Food Intake - Day 1	pmid25651185	g	NULL
rs32668729	1	180040678	1.16317e-09	Food Intake AVG - 4 Wks Diet	pmid25651185	g	NULL
rs32669516	1	179988191	1.0475e-08	Food Intake - Day 1	pmid25651185	g	NULL
rs32669516	1	179988191	3.25363e-09	Food Intake AVG - 4 Wks Diet	pmid25651185	g	NULL
rs32671111	1	180045066	9.99362e-07	Food Intake AVG - 4 Wks Diet	pmid25651185	g	NULL
rs32671111	1	180045066	5.05454e-07	Food Intake - Day 3	pmid25651185	g	NULL
rs32671677	1	179982756	1.28994e-07	Food Intake - Day 1	pmid25651185	g	NULL
rs32671677	1	179982756	1.16317e-09	Food Intake AVG - 4 Wks Diet	pmid25651185	g	NULL
rs32672114	1	180045256	8.58656e-07	Food Intake - Day 3	pmid25651185	g	NULL
rs32674652	1	180137372	1.22951e-08	Food Intake - Day 1	pmid25651185	g	NULL
rs32674652	1	180137372	3.72453e-09	Food Intake AVG - 4 Wks Diet	pmid25651185	g	NULL
rs32677471	1	180158326	7.53606e-08	Food Intake - Day 1	pmid25651185	g	NULL
rs32677471	1	180158326	1.83364e-08	Food Intake AVG - 4 Wks Diet	pmid25651185	g	NULL
rs32677859	1	174981277	1.3561e-07	Food Intake AVG - 4 Wks Diet	pmid25651185	g	NULL
rs32677859	1	174981277	1.28217e-07	Food Intake - Day 3	pmid25651185	g	NULL
rs32678465	1	180172901	1.22951e-08	Food Intake - Day 1	pmid25651185	g	NULL
rs32678465	1	180172901	3.72453e-09	Food Intake AVG - 4 Wks Diet	pmid25651185	g	NULL
rs32678468	1	180172932	5.38993e-08	Food Intake - Day 1	pmid25651185	g	NULL
rs32678468	1	180172932	2.13093e-08	Food Intake AVG - 4 Wks Diet	pmid25651185	g	NULL
rs32683116	1	180211230	4.83179e-08	Food Intake - Day 1	pmid25651185	g	NULL
rs32683116	1	180211230	6.9888e-09	Food Intake AVG - 4 Wks Diet	pmid25651185	g	NULL
rs32689836	1	180221967	1.34634e-07	Food Intake - Day 1	pmid25651185	g	NULL
rs32689836	1	180221967	3.72282e-09	Food Intake AVG - 4 Wks Diet	pmid25651185	g	NULL
rs32697532	1	180360915	1.00813e-07	Food Intake - Day 1	pmid25651185	g	NULL
rs32697532	1	180360915	4.19054e-09	Food Intake AVG - 4 Wks Diet	pmid25651185	g	NULL
rs32698783	1	180362782	4.8156e-07	Food Intake - Day 1	pmid25651185	g	NULL
rs32698783	1	180362782	6.55188e-08	Food Intake AVG - 4 Wks Diet	pmid25651185	g	NULL
rs32699153	1	180647072	7.43325e-07	Food Intake - Day 3	pmid25651185	g	NULL
rs32703833	1	180415822	8.85778e-07	Food Intake AVG - 4 Wks Diet	pmid25651185	g	NULL
rs32706747	1	178790473	2.07508e-08	Food Intake - Day 1	pmid25651185	g	NULL
rs32706747	1	178790473	5.61324e-07	BF	pmid25651185	%	(final % - initial %) / initial %
rs32706747	1	178790473	1.49232e-09	Food Intake AVG - 4 Wks Diet	pmid25651185	g	NULL
rs32708914	1	180530309	2.48651e-09	Food Intake - Day 1	pmid25651185	g	NULL
rs32708914	1	180530309	1.43816e-07	BF	pmid25651185	%	(final % - initial %) / initial %
rs32708914	1	180530309	7.1111e-10	Food Intake AVG - 4 Wks Diet	pmid25651185	g	NULL
rs32709178	1	180507272	6.04912e-07	Food Intake - Day 3	pmid25651185	g	NULL
rs32710070	1	180503951	6.04912e-07	Food Intake - Day 3	pmid25651185	g	NULL
rs32710237	1	180507573	2.48651e-09	Food Intake - Day 1	pmid25651185	g	NULL
rs32710237	1	180507573	1.43816e-07	BF	pmid25651185	%	(final % - initial %) / initial %
rs32710237	1	180507573	7.1111e-10	Food Intake AVG - 4 Wks Diet	pmid25651185	g	NULL
rs32711037	1	180504137	6.04912e-07	Food Intake - Day 3	pmid25651185	g	NULL
rs32711888	1	180504593	6.04912e-07	Food Intake - Day 3	pmid25651185	g	NULL
rs32721234	1	180606781	1.19287e-08	Food Intake - Day 1	pmid25651185	g	NULL
rs32721234	1	180606781	1.20603e-07	BF	pmid25651185	%	(final % - initial %) / initial %
rs32721234	1	180606781	1.50773e-09	Food Intake AVG - 4 Wks Diet	pmid25651185	g	NULL
rs32721345	1	180754818	2.77744e-08	Food Intake - Day 1	pmid25651185	g	NULL
rs32721345	1	180754818	3.45903e-07	BF	pmid25651185	%	(final % - initial %) / initial %
rs32721345	1	180754818	2.73841e-09	Food Intake AVG - 4 Wks Diet	pmid25651185	g	NULL
rs32721348	1	180754833	2.77744e-08	Food Intake - Day 1	pmid25651185	g	NULL
rs32721348	1	180754833	3.45903e-07	BF	pmid25651185	%	(final % - initial %) / initial %
rs32721348	1	180754833	2.73841e-09	Food Intake AVG - 4 Wks Diet	pmid25651185	g	NULL
rs32722826	1	176825405	7.79137e-07	Food Intake - Day 1	pmid25651185	g	NULL
rs32722826	1	176825405	4.39776e-07	Food Intake AVG - 4 Wks Diet	pmid25651185	g	NULL
rs32725242	1	180781478	2.77744e-08	Food Intake - Day 1	pmid25651185	g	NULL
rs32725242	1	180781478	3.45903e-07	BF	pmid25651185	%	(final % - initial %) / initial %
rs32725242	1	180781478	2.73841e-09	Food Intake AVG - 4 Wks Diet	pmid25651185	g	NULL
rs32726544	1	180781663	2.77744e-08	Food Intake - Day 1	pmid25651185	g	NULL
rs32726544	1	180781663	3.45903e-07	BF	pmid25651185	%	(final % - initial %) / initial %
rs32726544	1	180781663	2.73841e-09	Food Intake AVG - 4 Wks Diet	pmid25651185	g	NULL
rs32726704	1	180710664	1.87801e-09	Food Intake - Day 1	pmid25651185	g	NULL
rs32726704	1	180710664	1.33825e-07	BF	pmid25651185	%	(final % - initial %) / initial %
rs32726704	1	180710664	6.08464e-10	Food Intake AVG - 4 Wks Diet	pmid25651185	g	NULL
rs32727777	1	175331265	9.65773e-10	KC	pmid26694027	pg/ml	NULL
rs32727777	1	175331265	5.6022e-07	Food Intake - Day 3	pmid25651185	g	NULL
rs32733310	1	180898194	1.4551e-07	Food Intake - Day 1	pmid25651185	g	NULL
rs32733310	1	180898194	9.54168e-08	BF	pmid25651185	%	(final % - initial %) / initial %
rs32733310	1	180898194	4.75472e-08	Food Intake AVG - 4 Wks Diet	pmid25651185	g	NULL
rs32733439	1	53209004	5.67091e-07	grip	reue	NA	NA
rs32733466	1	175090891	6.10532e-07	Food Intake - Day 1	pmid25651185	g	NULL
rs32736036	1	177357812	6.8125e-09	Food Intake - Day 1	pmid25651185	g	NULL
rs32736036	1	177357812	3.41873e-10	Food Intake AVG - 4 Wks Diet	pmid25651185	g	NULL
rs32736320	1	180915472	2.43783e-07	Food Intake - Day 1	pmid25651185	g	NULL
rs32736320	1	180915472	2.73934e-07	BF	pmid25651185	%	(final % - initial %) / initial %
rs32736320	1	180915472	2.24873e-08	Food Intake AVG - 4 Wks Diet	pmid25651185	g	NULL
rs32736582	1	180924823	3.68891e-09	Food Intake - Day 1	pmid25651185	g	NULL
rs32736582	1	180924823	6.91333e-08	BF	pmid25651185	%	(final % - initial %) / initial %
rs32736582	1	180924823	1.17039e-09	Food Intake AVG - 4 Wks Diet	pmid25651185	g	NULL
rs32736628	1	180946146	7.63383e-07	Food Intake - Day 1	pmid25651185	g	NULL
rs32736628	1	180946146	1.14004e-07	BF	pmid25651185	%	(final % - initial %) / initial %
rs32736628	1	180946146	2.09444e-08	Food Intake AVG - 4 Wks Diet	pmid25651185	g	NULL
rs32737686	1	180960724	2.65602e-07	Food Intake - Day 1	pmid25651185	g	NULL
rs32737686	1	180960724	7.07356e-07	BF	pmid25651185	%	(final % - initial %) / initial %
rs32737686	1	180960724	1.12399e-08	Food Intake AVG - 4 Wks Diet	pmid25651185	g	NULL
rs32738870	1	175509366	2.8583e-07	Food Intake - Day 1	pmid25651185	g	NULL
rs32738870	1	175509366	8.94408e-07	Food Intake AVG - 4 Wks Diet	pmid25651185	g	NULL
rs32742534	1	171739305	2.62923e-07	Food Intake AVG - 4 Wks Diet	pmid25651185	g	NULL
rs32743526	1	178839390	1.52048e-09	Food Intake - Day 1	pmid25651185	g	NULL
rs32743526	1	178839390	3.28357e-10	Food Intake AVG - 4 Wks Diet	pmid25651185	g	NULL
rs32743935	1	180995813	1.19287e-08	Food Intake - Day 1	pmid25651185	g	NULL
rs32743935	1	180995813	1.20603e-07	BF	pmid25651185	%	(final % - initial %) / initial %
rs32743935	1	180995813	1.50773e-09	Food Intake AVG - 4 Wks Diet	pmid25651185	g	NULL
rs32744997	1	181429602	6.19156e-07	Food Intake AVG - 4 Wks Diet	pmid25651185	g	NULL
rs32746383	1	180998318	1.19287e-08	Food Intake - Day 1	pmid25651185	g	NULL
rs32746383	1	180998318	1.20603e-07	BF	pmid25651185	%	(final % - initial %) / initial %
rs32746383	1	180998318	1.50773e-09	Food Intake AVG - 4 Wks Diet	pmid25651185	g	NULL
rs32746574	1	180991961	6.76569e-07	Food Intake AVG - 4 Wks Diet	pmid25651185	g	NULL
rs32746574	1	180991961	7.98547e-07	Food Intake - Day 3	pmid25651185	g	NULL
rs32746582	1	180993203	2.54057e-09	Food Intake - Day 1	pmid25651185	g	NULL
rs32746582	1	180993203	1.4723e-07	BF	pmid25651185	%	(final % - initial %) / initial %
rs32746582	1	180993203	6.409e-10	Food Intake AVG - 4 Wks Diet	pmid25651185	g	NULL
rs32746782	1	181086598	1.30603e-08	Food Intake - Day 1	pmid25651185	g	NULL
rs32746782	1	181086598	1.27058e-07	BF	pmid25651185	%	(final % - initial %) / initial %
rs32746782	1	181086598	1.83253e-09	Food Intake AVG - 4 Wks Diet	pmid25651185	g	NULL
rs32746989	1	180998618	1.19287e-08	Food Intake - Day 1	pmid25651185	g	NULL
rs32746989	1	180998618	1.20603e-07	BF	pmid25651185	%	(final % - initial %) / initial %
rs32746989	1	180998618	1.50773e-09	Food Intake AVG - 4 Wks Diet	pmid25651185	g	NULL
rs32747333	1	181091175	1.30603e-08	Food Intake - Day 1	pmid25651185	g	NULL
rs32747333	1	181091175	1.27058e-07	BF	pmid25651185	%	(final % - initial %) / initial %
rs32747333	1	181091175	1.83253e-09	Food Intake AVG - 4 Wks Diet	pmid25651185	g	NULL
rs32748275	1	181087103	2.50185e-09	Food Intake - Day 1	pmid25651185	g	NULL
rs32748275	1	181087103	1.72377e-07	BF	pmid25651185	%	(final % - initial %) / initial %
rs32748275	1	181087103	7.464e-10	Food Intake AVG - 4 Wks Diet	pmid25651185	g	NULL
rs32752776	1	177027375	8.7888e-09	Food Intake AVG - 4 Wks Diet	pmid25651185	g	NULL
rs32763750	1	181255548	8.06106e-07	Food Intake AVG - 4 Wks Diet	pmid25651185	g	NULL
rs32763750	1	181255548	7.57656e-07	Food Intake - Day 3	pmid25651185	g	NULL
rs32764292	1	178432781	2.73559e-08	Food Intake - Day 1	pmid25651185	g	NULL
rs32764292	1	178432781	1.62763e-09	Food Intake AVG - 4 Wks Diet	pmid25651185	g	NULL
rs32765070	1	181888358	7.68177e-09	Food Intake - Day 1	pmid25651185	g	NULL
rs32765070	1	181888358	9.23473e-08	BF	pmid25651185	%	(final % - initial %) / initial %
rs32765070	1	181888358	1.73387e-09	Food Intake AVG - 4 Wks Diet	pmid25651185	g	NULL
rs32766183	1	181342226	1.30603e-08	Food Intake - Day 1	pmid25651185	g	NULL
rs32766183	1	181342226	1.27058e-07	BF	pmid25651185	%	(final % - initial %) / initial %
rs32766183	1	181342226	1.83253e-09	Food Intake AVG - 4 Wks Diet	pmid25651185	g	NULL
rs32766494	1	181311729	8.06106e-07	Food Intake AVG - 4 Wks Diet	pmid25651185	g	NULL
rs32766494	1	181311729	7.57656e-07	Food Intake - Day 3	pmid25651185	g	NULL
rs32766498	1	181311755	8.06106e-07	Food Intake AVG - 4 Wks Diet	pmid25651185	g	NULL
rs32766498	1	181311755	7.57656e-07	Food Intake - Day 3	pmid25651185	g	NULL
rs32767850	1	181347358	2.67991e-08	Food Intake - Day 1	pmid25651185	g	NULL
rs32767850	1	181347358	1.36521e-07	BF	pmid25651185	%	(final % - initial %) / initial %
rs32767850	1	181347358	3.91833e-09	Food Intake AVG - 4 Wks Diet	pmid25651185	g	NULL
rs32768043	1	182536674	3.63536e-08	Food Intake - Day 1	pmid25651185	g	NULL
rs32768043	1	182536674	2.159e-07	BF	pmid25651185	%	(final % - initial %) / initial %
rs32768043	1	182536674	1.77366e-09	Food Intake AVG - 4 Wks Diet	pmid25651185	g	NULL
rs32768540	1	178445688	1.28481e-08	Food Intake - Day 1	pmid25651185	g	NULL
rs32768540	1	178445688	1.80669e-09	Food Intake AVG - 4 Wks Diet	pmid25651185	g	NULL
rs32768983	1	181313622	2.48651e-09	Food Intake - Day 1	pmid25651185	g	NULL
rs32768983	1	181313622	1.43816e-07	BF	pmid25651185	%	(final % - initial %) / initial %
rs32768983	1	181313622	7.1111e-10	Food Intake AVG - 4 Wks Diet	pmid25651185	g	NULL
rs32769222	1	181365496	8.06106e-07	Food Intake AVG - 4 Wks Diet	pmid25651185	g	NULL
rs32769222	1	181365496	7.57656e-07	Food Intake - Day 3	pmid25651185	g	NULL
rs32769971	1	181345085	1.91484e-08	Food Intake - Day 1	pmid25651185	g	NULL
rs32769971	1	181345085	1.02926e-07	BF	pmid25651185	%	(final % - initial %) / initial %
rs32769971	1	181345085	3.09717e-09	Food Intake AVG - 4 Wks Diet	pmid25651185	g	NULL
rs32770676	1	181314107	1.30603e-08	Food Intake - Day 1	pmid25651185	g	NULL
rs32770676	1	181314107	1.27058e-07	BF	pmid25651185	%	(final % - initial %) / initial %
rs32770676	1	181314107	1.83253e-09	Food Intake AVG - 4 Wks Diet	pmid25651185	g	NULL
rs32771064	1	182005966	8.58865e-07	Food Intake AVG - 4 Wks Diet	pmid25651185	g	NULL
rs32771167	1	181345200	1.30603e-08	Food Intake - Day 1	pmid25651185	g	NULL
rs32771167	1	181345200	1.27058e-07	BF	pmid25651185	%	(final % - initial %) / initial %
rs32771167	1	181345200	1.83253e-09	Food Intake AVG - 4 Wks Diet	pmid25651185	g	NULL
rs32773079	1	181899981	7.68177e-09	Food Intake - Day 1	pmid25651185	g	NULL
rs32773079	1	181899981	9.23473e-08	BF	pmid25651185	%	(final % - initial %) / initial %
rs32773079	1	181899981	1.73387e-09	Food Intake AVG - 4 Wks Diet	pmid25651185	g	NULL
rs32773262	1	181424216	2.48651e-09	Food Intake - Day 1	pmid25651185	g	NULL
rs32773262	1	181424216	1.43816e-07	BF	pmid25651185	%	(final % - initial %) / initial %
rs32773262	1	181424216	7.1111e-10	Food Intake AVG - 4 Wks Diet	pmid25651185	g	NULL
rs32773514	1	172789545	2.24984e-08	KC	pmid26694027	pg/ml	NULL
rs32779887	1	181521282	4.98801e-07	Food Intake - Day 1	pmid25651185	g	NULL
rs32779887	1	181521282	2.13222e-07	BF	pmid25651185	%	(final % - initial %) / initial %
rs32779887	1	181521282	3.08336e-08	Food Intake AVG - 4 Wks Diet	pmid25651185	g	NULL
rs32781733	1	181523886	3.04531e-07	Food Intake - Day 1	pmid25651185	g	NULL
rs32781733	1	181523886	1.49351e-07	BF	pmid25651185	%	(final % - initial %) / initial %
rs32781733	1	181523886	4.58711e-08	Food Intake AVG - 4 Wks Diet	pmid25651185	g	NULL
rs32781874	1	181530284	4.98801e-07	Food Intake - Day 1	pmid25651185	g	NULL
rs32781874	1	181530284	2.13222e-07	BF	pmid25651185	%	(final % - initial %) / initial %
rs32781874	1	181530284	3.08336e-08	Food Intake AVG - 4 Wks Diet	pmid25651185	g	NULL
rs32781877	1	181530374	4.98801e-07	Food Intake - Day 1	pmid25651185	g	NULL
rs32781877	1	181530374	2.13222e-07	BF	pmid25651185	%	(final % - initial %) / initial %
rs32781877	1	181530374	3.08336e-08	Food Intake AVG - 4 Wks Diet	pmid25651185	g	NULL
rs32782632	1	181216019	8.06106e-07	Food Intake AVG - 4 Wks Diet	pmid25651185	g	NULL
rs32782632	1	181216019	7.57656e-07	Food Intake - Day 3	pmid25651185	g	NULL
rs32783212	1	181584900	2.48651e-09	Food Intake - Day 1	pmid25651185	g	NULL
rs32783212	1	181584900	1.43816e-07	BF	pmid25651185	%	(final % - initial %) / initial %
rs32783212	1	181584900	7.1111e-10	Food Intake AVG - 4 Wks Diet	pmid25651185	g	NULL
rs32787457	1	181693695	1.50349e-08	Food Intake - Day 1	pmid25651185	g	NULL
rs32787457	1	181693695	7.24561e-09	Food Intake AVG - 4 Wks Diet	pmid25651185	g	NULL
rs32788270	1	178673053	1.30136e-08	Food Intake - Day 1	pmid25651185	g	NULL
rs32788270	1	178673053	7.33674e-10	Food Intake AVG - 4 Wks Diet	pmid25651185	g	NULL
rs32788850	1	172313837	4.01584e-07	KC	pmid26694027	pg/ml	NULL
rs32789645	1	172886937	2.25528e-09	KC	pmid26694027	pg/ml	NULL
rs32789650	1	172952599	1.25586e-10	KC	pmid26694027	pg/ml	NULL
rs32790157	1	181699048	2.48651e-09	Food Intake - Day 1	pmid25651185	g	NULL
rs32790157	1	181699048	1.43816e-07	BF	pmid25651185	%	(final % - initial %) / initial %
rs32790157	1	181699048	7.1111e-10	Food Intake AVG - 4 Wks Diet	pmid25651185	g	NULL
rs32795262	1	177701476	1.22178e-07	Food Intake - Day 1	pmid25651185	g	NULL
rs32795262	1	177701476	6.69934e-09	Food Intake AVG - 4 Wks Diet	pmid25651185	g	NULL
rs32800050	1	176949024	7.79137e-07	Food Intake - Day 1	pmid25651185	g	NULL
rs32800050	1	176949024	4.39776e-07	Food Intake AVG - 4 Wks Diet	pmid25651185	g	NULL
rs32803160	1	185350439	6.74049e-07	total cholesterol	pmid25480693	mg/dl	total cholesterol
rs32803348	1	176056365	1.22348e-08	Food Intake - Day 1	pmid25651185	g	NULL
rs32803348	1	176056365	9.91169e-11	Food Intake AVG - 4 Wks Diet	pmid25651185	g	NULL
rs32803887	1	176990372	1.96491e-07	Food Intake - Day 1	pmid25651185	g	NULL
rs32803887	1	176990372	7.65876e-10	Food Intake AVG - 4 Wks Diet	pmid25651185	g	NULL
rs32804598	1	177510561	2.37256e-08	Food Intake - Day 1	pmid25651185	g	NULL
rs32804598	1	177510561	2.18109e-09	Food Intake AVG - 4 Wks Diet	pmid25651185	g	NULL
rs32811046	1	178221099	6.13502e-08	Food Intake - Day 1	pmid25651185	g	NULL
rs32811046	1	178221099	5.72571e-09	Food Intake AVG - 4 Wks Diet	pmid25651185	g	NULL
rs32813209	1	133175781	4.66567e-07	Velocity of circumferential shortening (day 7)	pmid25480693	%/ms	Velocity of circumferential shortening
rs32813209	1	133175781	4.93956e-07	Mean normalized systolic ejection rate (day 7)	pmid25480693	%/ms	Mean normalized systolic ejection rate
rs32843979	1	65481107	1.31652e-08	Food Intake - Day 1	pmid25651185	g	NULL
rs32895976	1	68620962	3.885e-12	grip	reue	NA	NA
rs32895976	1	68620962	6.8186e-08	gripbw	reue	NA	NA
rs32925605	1	187331220	7.38717e-07	Food Intake AVG - 4 Wks Diet	pmid25651185	g	NULL
rs32927231	1	187332875	7.38717e-07	Food Intake AVG - 4 Wks Diet	pmid25651185	g	NULL
rs32932906	1	187340866	7.38717e-07	Food Intake AVG - 4 Wks Diet	pmid25651185	g	NULL
rs33071575	1	192441251	8.16253e-08	MIP-1b	pmid26694027	pg/ml	NULL
rs33121227	1	193087240	4.72318e-07	MIP-1b	pmid26694027	pg/ml	NULL
rs33140900	1	99941871	2.43787e-07	Food Intake - Day 1	pmid25651185	g	NULL
rs33192760	1	106946947	2.17231e-08	G-CSF	pmid26694027	pg/ml	NULL
rs33195656	1	106944835	2.17231e-08	G-CSF	pmid26694027	pg/ml	NULL
rs33197311	1	106949804	6.37701e-08	G-CSF	pmid26694027	pg/ml	NULL
rs33197320	1	106942683	2.17231e-08	G-CSF	pmid26694027	pg/ml	NULL
rs33200461	1	106903263	2.17231e-08	G-CSF	pmid26694027	pg/ml	NULL
rs33208919	1	193843543	5.67196e-12	grip	reue	NA	NA
rs33208919	1	193843543	2.64579e-07	gripbw	reue	NA	NA
rs33335672	1	42637571	1.87572e-07	Mean normalized systolic ejection rate (day 7)	pmid25480693	%/ms	Mean normalized systolic ejection rate
rs33560781	1	136956786	6.30275e-07	MIP-1b	pmid26694027	pg/ml	NULL
rs33565314	1	136913460	1.55062e-07	MIP-1b	pmid26694027	pg/ml	NULL
rs33569845	1	136873521	1.03243e-07	MIP-1b	pmid26694027	pg/ml	NULL
rs33572649	1	136853881	1.55062e-07	MIP-1b	pmid26694027	pg/ml	NULL
rs33574023	1	136717077	7.77707e-09	MIP-1b	pmid26694027	pg/ml	NULL
rs33578605	1	136749717	1.05428e-08	MIP-1b	pmid26694027	pg/ml	NULL
rs33581750	1	136588512	7.77707e-09	MIP-1b	pmid26694027	pg/ml	NULL
rs33584023	1	136595236	1.55062e-07	MIP-1b	pmid26694027	pg/ml	NULL
rs33586240	1	136554384	1.02421e-10	MIP-1b	pmid26694027	pg/ml	NULL
rs33589350	1	136537577	1.12066e-09	MIP-1b	pmid26694027	pg/ml	NULL
rs33591955	1	136497392	5.09807e-09	MIP-1b	pmid26694027	pg/ml	NULL
rs33592495	1	136481161	1.12066e-09	MIP-1b	pmid26694027	pg/ml	NULL
rs33592715	1	136502212	5.09807e-09	MIP-1b	pmid26694027	pg/ml	NULL
rs33592719	1	136501844	5.09807e-09	MIP-1b	pmid26694027	pg/ml	NULL
rs33593545	1	136501583	5.09807e-09	MIP-1b	pmid26694027	pg/ml	NULL
rs33596022	1	136506707	5.09807e-09	MIP-1b	pmid26694027	pg/ml	NULL
rs33596386	1	136486216	5.09807e-09	MIP-1b	pmid26694027	pg/ml	NULL
rs33596682	1	136497865	2.23609e-09	MIP-1b	pmid26694027	pg/ml	NULL
rs33692580	1	49822099	9.85111e-08	Food Intake - Day 1	pmid25651185	g	NULL
rs33709118	1	155656888	6.57881e-07	Mitral inflow A to E velocity ratio (day 21)	pmid25480693	NULL	Mitral inflow A to E velocity ratio
rs33712888	1	158168078	7.81828e-07	total cholesterol	pmid20054062	mg/dl	NULL
rs33712888	1	158168078	1.19545e-07	HDL	pmid20054062	mg/dl	NULL
rs33741999	1	161394823	7.16947e-08	unesterified cholesterol	pmid25480693	mg/dl	unesterified cholesterol
rs33745289	1	161388455	7.16947e-08	unesterified cholesterol	pmid25480693	mg/dl	unesterified cholesterol
rs33750239	1	161347505	7.37207e-08	unesterified cholesterol	pmid25480693	mg/dl	unesterified cholesterol
rs33773188	1	170813635	3.89124e-07	G-CSF	pmid26694027	pg/ml	NULL
rs33774132	1	170772322	3.89124e-07	G-CSF	pmid26694027	pg/ml	NULL
rs33779089	1	170646039	3.89124e-07	G-CSF	pmid26694027	pg/ml	NULL
rs33779163	1	170674796	3.89124e-07	G-CSF	pmid26694027	pg/ml	NULL
rs33779703	1	170800029	3.89124e-07	G-CSF	pmid26694027	pg/ml	NULL
rs33780877	1	174211021	8.97013e-11	KC	pmid26694027	pg/ml	NULL
rs33780879	1	174210967	3.92234e-11	KC	pmid26694027	pg/ml	NULL
rs33780879	1	174210967	6.03392e-07	Food Intake - Day 3	pmid25651185	g	NULL
rs33782122	1	170659968	3.89124e-07	G-CSF	pmid26694027	pg/ml	NULL
rs33784297	1	170602676	3.89124e-07	G-CSF	pmid26694027	pg/ml	NULL
rs33784508	1	170648502	3.89124e-07	G-CSF	pmid26694027	pg/ml	NULL
rs33785320	1	174148714	4.99199e-08	HDL	pmid20054062	mg/dl	NULL
rs33785320	1	174148714	1.58112e-07	total cholesterol	pmid20054062	mg/dl	NULL
rs33786587	1	174170805	8.97013e-11	KC	pmid26694027	pg/ml	NULL
rs33787432	1	170578973	7.4824e-07	total cholesterol	pmid20054062	mg/dl	NULL
rs33787432	1	170578973	7.8737e-08	HDL	pmid20054062	mg/dl	NULL
rs33788366	1	174222618	1.89382e-09	KC	pmid26694027	pg/ml	NULL
rs33788366	1	174222618	5.64271e-07	Food Intake - Day 3	pmid25651185	g	NULL
rs33788373	1	174219722	6.05412e-09	KC	pmid26694027	pg/ml	NULL
rs33788373	1	174219722	5.92738e-07	Food Intake - Day 3	pmid25651185	g	NULL
rs33788663	1	174169336	7.93368e-11	KC	pmid26694027	pg/ml	NULL
rs33789375	1	174219588	4.71537e-10	KC	pmid26694027	pg/ml	NULL
rs33789375	1	174219588	7.08875e-07	Food Intake AVG - 4 Wks Diet	pmid25651185	g	NULL
rs33789375	1	174219588	4.17139e-07	Food Intake - Day 3	pmid25651185	g	NULL
rs33789628	1	174066879	3.92234e-11	KC	pmid26694027	pg/ml	NULL
rs33789628	1	174066879	5.00139e-07	Food Intake - Day 3	pmid25651185	g	NULL
rs33789629	1	174066845	7.71655e-07	KC	pmid26694027	pg/ml	NULL
rs33789629	1	174066845	5.32851e-07	Food Intake AVG - 4 Wks Diet	pmid25651185	g	NULL
rs33789629	1	174066845	8.59401e-07	Food Intake - Day 3	pmid25651185	g	NULL
rs33789630	1	174066622	7.71655e-07	KC	pmid26694027	pg/ml	NULL
rs33789630	1	174066622	5.32851e-07	Food Intake AVG - 4 Wks Diet	pmid25651185	g	NULL
rs33789630	1	174066622	8.59401e-07	Food Intake - Day 3	pmid25651185	g	NULL
rs33789837	1	173998150	7.65678e-08	Food Intake - Day 1	pmid25651185	g	NULL
rs33789837	1	173998150	2.46867e-09	Food Intake AVG - 4 Wks Diet	pmid25651185	g	NULL
rs33789961	1	174043440	2.66977e-07	Food Intake - Day 1	pmid25651185	g	NULL
rs33791633	1	174074719	1.24968e-07	HDL	pmid20054062	mg/dl	NULL
rs33792181	1	174037671	3.92234e-11	KC	pmid26694027	pg/ml	NULL
rs33792181	1	174037671	5.00139e-07	Food Intake - Day 3	pmid25651185	g	NULL
rs33792657	1	174074570	4.91399e-11	KC	pmid26694027	pg/ml	NULL
rs33792657	1	174074570	7.84006e-07	Food Intake - Day 3	pmid25651185	g	NULL
rs33792659	1	174074503	4.91399e-11	KC	pmid26694027	pg/ml	NULL
rs33792659	1	174074503	7.84006e-07	Food Intake - Day 3	pmid25651185	g	NULL
rs33793479	1	173971432	1.28076e-10	KC	pmid26694027	pg/ml	NULL
rs33793479	1	173971432	6.77566e-07	Food Intake - Day 3	pmid25651185	g	NULL
rs33794158	1	174036719	3.01466e-07	Insulin pg/ml	pmid25651185	pg/ml	NULL
rs33794734	1	174100264	4.2528e-07	KC	pmid26694027	pg/ml	NULL
rs33794734	1	174100264	6.76537e-07	Food Intake AVG - 4 Wks Diet	pmid25651185	g	NULL
rs33794734	1	174100264	8.91694e-07	Food Intake - Day 3	pmid25651185	g	NULL
rs33796943	1	174639647	9.65773e-10	KC	pmid26694027	pg/ml	NULL
rs33796943	1	174639647	5.6022e-07	Food Intake - Day 3	pmid25651185	g	NULL
rs33797873	1	174689368	2.68201e-07	Food Intake - Day 1	pmid25651185	g	NULL
rs33797873	1	174689368	7.85103e-09	Food Intake AVG - 4 Wks Diet	pmid25651185	g	NULL
rs33797944	1	174639596	9.65773e-10	KC	pmid26694027	pg/ml	NULL
rs33797952	1	174639127	1.84915e-07	Food Intake - Day 1	pmid25651185	g	NULL
rs33797952	1	174639127	4.46127e-09	Food Intake AVG - 4 Wks Diet	pmid25651185	g	NULL
rs33798120	1	174583832	4.98568e-09	Food Intake AVG - 4 Wks Diet	pmid25651185	g	NULL
rs33798416	1	174759487	3.40302e-07	Food Intake - Day 1	pmid25651185	g	NULL
rs33798416	1	174759487	9.57276e-07	Food Intake AVG - 4 Wks Diet	pmid25651185	g	NULL
rs33799726	1	174583205	9.65773e-10	KC	pmid26694027	pg/ml	NULL
rs33799726	1	174583205	5.6022e-07	Food Intake - Day 3	pmid25651185	g	NULL
rs33799727	1	174583154	1.79082e-07	HDL	pmid20054062	mg/dl	NULL
rs33799753	1	174637540	2.11283e-07	Food Intake - Day 1	pmid25651185	g	NULL
rs33799753	1	174637540	7.50229e-07	Food Intake AVG - 4 Wks Diet	pmid25651185	g	NULL
rs33800032	1	174735348	1.71592e-07	Food Intake - Day 1	pmid25651185	g	NULL
rs33800032	1	174735348	8.25639e-09	Food Intake AVG - 4 Wks Diet	pmid25651185	g	NULL
rs33800309	1	174666538	8.21406e-07	Food Intake AVG - 4 Wks Diet	pmid25651185	g	NULL
rs33800647	1	174626648	1.24968e-07	HDL	pmid20054062	mg/dl	NULL
rs33800669	1	174550218	7.22231e-07	HDL	pmid20054062	mg/dl	NULL
rs33801185	1	174357974	3.70368e-10	KC	pmid26694027	pg/ml	NULL
rs33801384	1	174557890	3.3574e-07	Food Intake AVG - 4 Wks Diet	pmid25651185	g	NULL
rs33801384	1	174557890	5.78465e-07	Food Intake - Day 3	pmid25651185	g	NULL
rs33802297	1	174635145	1.84915e-07	Food Intake - Day 1	pmid25651185	g	NULL
rs33802297	1	174635145	4.46127e-09	Food Intake AVG - 4 Wks Diet	pmid25651185	g	NULL
rs33802714	1	174547758	3.70368e-10	KC	pmid26694027	pg/ml	NULL
rs33803054	1	174662633	5.87497e-07	Food Intake - Day 1	pmid25651185	g	NULL
rs33803057	1	174662275	2.72409e-07	Food Intake - Day 1	pmid25651185	g	NULL
rs33803057	1	174662275	6.57283e-07	Food Intake AVG - 4 Wks Diet	pmid25651185	g	NULL
rs33803099	1	174555849	3.70368e-10	KC	pmid26694027	pg/ml	NULL
rs33803099	1	174555849	5.30954e-07	Food Intake - Day 3	pmid25651185	g	NULL
rs33803112	1	174633412	8.99022e-07	Food Intake AVG - 4 Wks Diet	pmid25651185	g	NULL
rs33803245	1	174695014	2.5911e-07	Food Intake AVG - 4 Wks Diet	pmid25651185	g	NULL
rs33803245	1	174695014	6.22949e-07	Food Intake - Day 3	pmid25651185	g	NULL
rs33803361	1	174423129	1.24968e-07	HDL	pmid20054062	mg/dl	NULL
rs33803622	1	174546388	3.70368e-10	KC	pmid26694027	pg/ml	NULL
rs33803622	1	174546388	4.17139e-07	Food Intake - Day 3	pmid25651185	g	NULL
rs33803913	1	177782732	7.11387e-09	Food Intake - Day 1	pmid25651185	g	NULL
[truncated: 5,766 more rows]
