# Supplementary material for: Proteome-wide systems genetics identifies UFMylation as a regulator of skeletal muscle function
Source: eLife. 2022 Dec 6;11:e82951. doi: 10.7554/eLife.82951 (PMC9833826; doi:10.7554/eLife.82951)
Supplement: Supplementary file 6. — Proteomics of extensor digitorum long (EDL) muscles displaying tandem mass tag (TMT) quantification expressed as Log2(area under the curve). Significance was calculated using paired Student’s t-test with Benjamini-Hochberg FDR. PEP: posterior error probability. Related to Figure 4. [file elife-82951-supp6.xlsx]

## Sheet: differential_expression_reactom
Accession	Description	gene	Log(shUFC1/shScramble)	p-value	q-value	q<0.05	Exp. q-value: Combined	Sum PEP Score	Coverage [%]	# Peptides	# PSMs	# Protein Unique Peptides	# Unique Peptides	# AAs	MW [kDa]	calc. pI	Score Sequest HT: Sequest HT	TMT126_435_L_shScramble	TMT127N_435_R_shUFC1	TMT127C_436_L_shScramble	TMT128N_436_R_shUFC1	TMT128C_437_L_shScramble	TMT129N_437_R_shUFC1	TMT129C_438_L_shScramble	TMT130N_438_R_shUFC1	TMT130C_444_L_shScramble	TMT131_444_R_shUFC1	gs_name
Q3KNY0	Immunoglobulin-like and fibronectin type III domain-containing protein 1 OS=Mus musculus OX=10090 GN=Igfn1 PE=1 SV=3	Igfn1	1.56429	0.00153486	0.0332544	+	0	240.582	22	46	71	9	46	2849	303.5	6.58	236.91	12.1969	14.5355	12.5546	14.0313	12.7824	14.3067	12.899	14.206	12.5576	13.7326	NA
Q8BGU0	Cytochrome P450, family 4, subfamily f, polypeptide 39 OS=Mus musculus OX=10090 GN=Cyp4f39 PE=1 SV=1	Cyp4f39	1.54782	0.000322967	0.0192769	+	0	19.269	6	3	4	2	2	532	61.9	8.35	14.48	7.97991	9.97037	8.07518	9.5659	8.77556	9.92261	8.45691	9.99801	7.84455	9.41435	REACTOME_ARACHIDONIC_ACID_METABOLISM|REACTOME_BIOLOGICAL_OXIDATIONS|REACTOME_CYTOCHROME_P450_ARRANGED_BY_SUBSTRATE_TYPE|REACTOME_DISEASE|REACTOME_DISEASES_OF_METABOLISM|REACTOME_EICOSANOIDS|REACTOME_FATTY_ACID_METABOLISM|REACTOME_FATTY_ACIDS|REACTOME_METABOLIC_DISORDERS_OF_BIOLOGICAL_OXIDATION_ENZYMES|REACTOME_METABOLISM_OF_LIPIDS|REACTOME_MISCELLANEOUS_SUBSTRATES|REACTOME_PHASE_I_FUNCTIONALIZATI…
P05064	Fructose-bisphosphate aldolase A OS=Mus musculus OX=10090 GN=Aldoa PE=1 SV=2	Aldoa	1.39088	6.26783e-06	0.00576057	+	0	515.949	93	51	799	0	1	364	39.3	8.09	3034.08	6.14674	7.48409	6.19726	7.68795	6.44455	7.68814	6.26742	7.7036	5.99279	7.4394	REACTOME_GLUCONEOGENESIS|REACTOME_GLUCOSE_METABOLISM|REACTOME_GLYCOLYSIS|REACTOME_HEMOSTASIS|REACTOME_INNATE_IMMUNE_SYSTEM|REACTOME_METABOLISM_OF_CARBOHYDRATES|REACTOME_NEUTROPHIL_DEGRANULATION|REACTOME_PLATELET_ACTIVATION_SIGNALING_AND_AGGREGATION|REACTOME_RESPONSE_TO_ELEVATED_PLATELET_CYTOSOLIC_CA2_
A0A0R4J1B0	Isoform of Q9QZ47, Troponin T, fast skeletal muscle OS=Mus musculus OX=10090 GN=Tnnt3 PE=1 SV=1	Tnnt3	1.34344	0.00330478	0.0419055	+	0	294	57	35	528	0	2	272	32.3	5.31	1625.8	8.7824	10.5698	9.08013	10.894	8.76393	10.1856	8.76012	9.63437	9.42391	10.244	REACTOME_MUSCLE_CONTRACTION|REACTOME_STRIATED_MUSCLE_CONTRACTION
Q99M71	Mammalian ependymin-related protein 1 OS=Mus musculus OX=10090 GN=Epdr1 PE=1 SV=1	Epdr1	1.33332	0.000771175	0.0258079	+	0	25.515	20	4	9	1	4	224	25.5	7.58	32.62	9.5816	11.4376	10.0233	11.3353	10.3342	11.3048	10.1953	11.5041	9.82795	11.0471	NA
Q8BGT5	Alanine aminotransferase 2 OS=Mus musculus OX=10090 GN=Gpt2 PE=1 SV=1	Gpt2	1.31098	0.00190654	0.0348785	+	0	36.394	16	7	10	4	6	522	57.9	8	36.22	9.59525	11.3434	9.89937	11.2742	10.5171	11.2287	10.4001	11.5458	9.96338	11.5379	REACTOME_METABOLISM_OF_AMINO_ACIDS_AND_DERIVATIVES
Q8CGC4	Protein LSM14 homolog B OS=Mus musculus OX=10090 GN=Lsm14b PE=1 SV=3	Lsm14b	1.31024	5.19895e-05	0.0116169	+	0	14.186	11	3	3	1	3	385	42.3	9.63	10.88	7.98647	9.49681	7.97323	9.42338	8.39786	9.56446	8.24459	9.42101	7.99585	9.24352	NA
Q64691	Calpain-3 OS=Mus musculus OX=10090 GN=Capn3 PE=1 SV=2	Capn3	1.2517	0.00267971	0.039363	+	0	168.761	40	27	51	4	27	821	94.2	6.14	176.73	11.9984	13.9629	12.4049	13.7185	12.7205	13.7118	12.7472	13.7509	12.5746	13.56	REACTOME_DEGRADATION_OF_THE_EXTRACELLULAR_MATRIX|REACTOME_DEVELOPMENTAL_BIOLOGY|REACTOME_DISEASE|REACTOME_DISEASES_OF_PROGRAMMED_CELL_DEATH|REACTOME_EXTRACELLULAR_MATRIX_ORGANIZATION|REACTOME_FORMATION_OF_THE_CORNIFIED_ENVELOPE|REACTOME_INNATE_IMMUNE_SYSTEM|REACTOME_KERATINIZATION|REACTOME_NEUTROPHIL_DEGRANULATION
P70670	Nascent polypeptide-associated complex subunit alpha, muscle-specific form OS=Mus musculus OX=10090 GN=Naca PE=1 SV=2	Naca	1.21151	0.00171008	0.0347358	+	0	404.053	42	69	120	63	69	2187	220.4	9.35	416.83	13.2188	15.0485	13.6183	14.8572	13.7644	14.7958	13.8718	14.8765	13.6132	14.566	NA
Q8K2T4	Ubiquinol-cytochrome-c reductase complex assembly factor 3 OS=Mus musculus OX=10090 GN=Uqcc3 PE=1 SV=1	Uqcc3	1.18642	4.93639e-05	0.0116169	+	0.001	5.412	18	2	2	2	2	89	9.6	9.52	6.2	8.51455	9.57892	8.50361	9.86843	8.71172	9.74304	8.65719	9.8388	8.38104	9.67103	NA
D3Z4C9	Isoform of Q9CQY6, Mitochondrial nucleoid factor 1 OS=Mus musculus OX=10090 GN=Uqcc2 PE=1 SV=1	Uqcc2	1.17505	0.000358665	0.0194562	+	0	32.575	50	6	14	0	6	127	15.4	9.7	43.3	11.3734	12.9573	11.6312	12.7737	11.8063	12.8827	11.8816	12.9543	11.6534	12.6532	NA
Q9DBG7	Signal recognition particle receptor subunit alpha OS=Mus musculus OX=10090 GN=Srpra PE=1 SV=1	Srpra	1.17239	0.000915701	0.0275671	+	0	83.176	27	18	23	6	18	636	69.6	8.95	69.54	11.3094	12.9812	11.5733	12.7734	11.8135	12.7305	11.9207	12.9269	11.581	12.6478	NA
Q9JL56	Glycerophosphodiester phosphodiesterase 1 OS=Mus musculus OX=10090 GN=Gde1 PE=1 SV=1	Gde1	1.17221	0.000108723	0.0136691	+	0.001	8.102	7	2	2	1	2	331	37.6	6.9	5.9	5.82866	6.87301	5.75867	6.77017	5.77408	6.87431	5.6403	7.04895	5.9441	7.24043	REACTOME_GLYCEROPHOSPHOLIPID_CATABOLISM|REACTOME_METABOLISM_OF_LIPIDS|REACTOME_PHOSPHOLIPID_METABOLISM|REACTOME_PI_METABOLISM
A0A0G2JEX1	Isoform of Q7TPW1, Nexilin OS=Mus musculus OX=10090 GN=Nexn PE=1 SV=1	Nexn	1.06069	0.00118923	0.0311336	+	0	111.305	33	22	50	0	0	671	80	5.22	167.62	12.7157	14.2174	12.8724	13.8699	12.7225	13.8941	12.9287	13.7774	12.9531	13.7371	NA
P63328	Serine/threonine-protein phosphatase 2B catalytic subunit alpha isoform OS=Mus musculus OX=10090 GN=Ppp3ca PE=1 SV=1	Ppp3ca	1.05852	0.00453617	0.0482959	+	0	82	31	15	37	1	9	521	58.6	5.86	110.9	12.2782	14.0393	12.6321	13.7235	12.9075	13.7128	12.9364	13.7907	12.6865	13.467	REACTOME_ACTIVATION_OF_BAD_AND_TRANSLOCATION_TO_MITOCHONDRIA_|REACTOME_ACTIVATION_OF_BH3_ONLY_PROTEINS|REACTOME_ADAPTIVE_IMMUNE_SYSTEM|REACTOME_BETA_CATENIN_INDEPENDENT_WNT_SIGNALING|REACTOME_C_TYPE_LECTIN_RECEPTORS_CLRS_|REACTOME_CA2_PATHWAY|REACTOME_CALCINEURIN_ACTIVATES_NFAT|REACTOME_CLEC7A_DECTIN_1_INDUCES_NFAT_ACTIVATION|REACTOME_CLEC7A_DECTIN_1_SIGNALING|REACTOME_DARPP_32_EVENTS|REACTOME_DE…
Q5NBX1	Protein cordon-bleu OS=Mus musculus OX=10090 GN=Cobl PE=1 SV=1	Cobl	1.0511	0.000522874	0.0227181	+	0	28.927	6	6	8	0	6	1337	143.8	7.77	25.98	10.1633	11.5536	10.3651	11.4588	10.5553	11.5181	10.4539	11.5085	10.4539	11.2079	NA
Q9CWU6	Ubiquinol-cytochrome-c reductase complex assembly factor 1 OS=Mus musculus OX=10090 GN=Uqcc1 PE=1 SV=1	Uqcc1	1.03162	0.000398167	0.0199387	+	0	33.893	20	6	10	0	6	295	34.3	8.48	35.1	10.2747	11.6753	10.4986	11.3657	10.699	11.6889	10.768	11.7196	10.4369	11.3859	NA
Q91V79	Fat storage-inducing transmembrane protein 1 OS=Mus musculus OX=10090 GN=Fitm1 PE=1 SV=1	Fitm1	0.973983	0.00256204	0.0388182	+	0	22.006	22	4	9	4	4	292	32.3	9.95	34.21	9.97869	11.4748	10.3365	11.2183	10.7082	11.3262	10.7286	11.5939	10.4374	11.4462	REACTOME_LIPID_PARTICLE_ORGANIZATION|REACTOME_METABOLISM_OF_LIPIDS
A0A1B0GSX6	Isoform of O70209, PDZ and LIM domain protein 3 OS=Mus musculus OX=10090 GN=Pdlim3 PE=1 SV=1	Pdlim3	0.965127	0.00475661	0.0493999	+	0	111.17	52	13	83	3	3	364	39.3	6.96	237.69	12.579	14.1848	12.9752	13.9524	13.1538	14.0173	13.2735	14.0163	13.1027	13.739	NA
Q9CRD0	OCIA domain-containing protein 1 OS=Mus musculus OX=10090 GN=Ociad1 PE=1 SV=1	Ociad1	0.961375	0.000117165	0.0141292	+	0	48.25	39	8	18	0	8	247	27.6	7.81	58.31	11.0558	12.2139	11.1567	12.0365	11.0966	12.0978	11.1621	12.1555	11.1446	11.919	NA
P97952	Sodium channel subunit beta-1 OS=Mus musculus OX=10090 GN=Scn1b PE=1 SV=1	Scn1b	0.9576	0.00377636	0.0445767	+	0.004	2.954	4	1	1	1	1	218	24.6	4.83	3.22	7.74212	9.15155	8.0058	9.00666	8.69257	9.15384	8.54112	9.34212	8.04181	9.15727	REACTOME_CARDIAC_CONDUCTION|REACTOME_DEVELOPMENTAL_BIOLOGY|REACTOME_INTERACTION_BETWEEN_L1_AND_ANKYRINS|REACTOME_L1CAM_INTERACTIONS|REACTOME_MUSCLE_CONTRACTION|REACTOME_NERVOUS_SYSTEM_DEVELOPMENT|REACTOME_PHASE_0_RAPID_DEPOLARISATION
F8WGI9	Isoform of P98156, Very low-density lipoprotein receptor OS=Mus musculus OX=10090 GN=Vldlr PE=1 SV=1	Vldlr	0.942788	0.000792696	0.0260225	+	0	20.826	9	5	6	0	5	804	88.9	4.84	20.1	8.99241	10.2986	9.25407	10.0555	9.49694	10.2705	9.52784	10.321	9.20645	10.246	REACTOME_CARGO_RECOGNITION_FOR_CLATHRIN_MEDIATED_ENDOCYTOSIS|REACTOME_CHYLOMICRON_CLEARANCE|REACTOME_CLATHRIN_MEDIATED_ENDOCYTOSIS|REACTOME_DEVELOPMENTAL_BIOLOGY|REACTOME_G_ALPHA_I_SIGNALLING_EVENTS|REACTOME_HEMOSTASIS|REACTOME_LDL_CLEARANCE|REACTOME_MEMBRANE_TRAFFICKING|REACTOME_METABOLISM_OF_FAT_SOLUBLE_VITAMINS|REACTOME_METABOLISM_OF_VITAMINS_AND_COFACTORS|REACTOME_NERVOUS_SYSTEM_DEVELOPMENT|R…
Q71RI9	Kynurenine--oxoglutarate transaminase 3 OS=Mus musculus OX=10090 GN=Kyat3 PE=1 SV=1	Kyat3	0.937961	0.000374153	0.0194562	+	0	31.014	14	6	10	0	6	455	51.1	8.37	33.37	10.2741	11.5	10.5254	11.4259	10.8151	11.5435	10.8119	11.6471	10.3601	11.3601	REACTOME_GLUTAMATE_AND_GLUTAMINE_METABOLISM|REACTOME_METABOLISM_OF_AMINO_ACIDS_AND_DERIVATIVES|REACTOME_PHENYLALANINE_AND_TYROSINE_METABOLISM|REACTOME_PHENYLALANINE_METABOLISM|REACTOME_TRYPTOPHAN_CATABOLISM
Q99LM2	CDK5 regulatory subunit-associated protein 3 OS=Mus musculus OX=10090 GN=Cdk5rap3 PE=1 SV=1	Cdk5rap3	0.912337	0.000978298	0.02876	+	0	14.302	5	5	5	1	5	503	57	4.83	16.02	10.3888	11.3513	10.4105	11.1473	10.0519	11.2252	10.2892	11.3697	10.4023	11.0109	NA
Q62009	Periostin OS=Mus musculus OX=10090 GN=Postn PE=1 SV=2	Postn	0.901301	0.00385459	0.0450134	+	0	140.361	36	23	42	0	1	838	93.1	7.53	174.18	12.4377	13.7406	12.8437	13.6434	12.7126	13.7987	12.6964	13.6063	12.3463	12.754	NA
Q6P3D0	U8 snoRNA-decapping enzyme OS=Mus musculus OX=10090 GN=Nudt16 PE=1 SV=1	Nudt16	0.893688	0.000366871	0.0194562	+	0	24.565	36	7	9	0	6	195	21.8	7.12	28.01	10.3694	11.5755	10.5891	11.4417	10.6644	11.5154	10.7628	11.5649	10.684	11.4407	REACTOME_METABOLISM_OF_NUCLEOTIDES|REACTOME_NUCLEOBASE_CATABOLISM|REACTOME_PHOSPHATE_BOND_HYDROLYSIS_BY_NUDT_PROTEINS|REACTOME_PURINE_CATABOLISM
Q3ULJ0	Glycerol-3-phosphate dehydrogenase 1-like protein OS=Mus musculus OX=10090 GN=Gpd1l PE=1 SV=2	Gpd1l	0.882326	0.000494182	0.0221221	+	0	54.966	27	11	30	0	9	351	38.2	6.77	80.28	11.119	12.3219	11.3029	12.1587	11.529	12.2198	11.5229	12.3663	11.3254	12.1442	REACTOME_GLYCEROPHOSPHOLIPID_BIOSYNTHESIS|REACTOME_METABOLISM_OF_LIPIDS|REACTOME_PHOSPHOLIPID_METABOLISM|REACTOME_SYNTHESIS_OF_PA
Q8R1Q3	Angiopoietin-related protein 7 OS=Mus musculus OX=10090 GN=Angptl7 PE=2 SV=1	Angptl7	0.876386	0.0029966	0.0398805	+	0	11.564	14	4	5	4	4	337	39	7.85	14.29	9.0666	9.87651	9.79117	10.5987	9.29992	10.694	9.27106	9.85517	9.30361	10.0898	NA
A0A1D5RLF1	Isoform of Q8BGH4, Receptor expression-enhancing protein OS=Mus musculus OX=10090 GN=Reep1 PE=1 SV=1	Reep1	0.875913	0.00149549	0.0328508	+	0	16.059	11	3	5	1	3	284	31.9	9.14	14.84	9.5753	10.8129	9.70198	10.584	10.0913	10.6359	9.91529	10.6882	9.67558	10.618	REACTOME_G_ALPHA_S_SIGNALLING_EVENTS|REACTOME_OLFACTORY_SIGNALING_PATHWAY|REACTOME_SIGNALING_BY_GPCR
Q61712	DnaJ homolog subfamily C member 1 OS=Mus musculus OX=10090 GN=Dnajc1 PE=1 SV=1	Dnajc1	0.8605	0.000753312	0.0257302	+	0	7.42	4	2	2	0	2	552	63.8	8.97	6.63	8.16709	8.74267	7.8824	8.6555	7.8315	8.84481	7.77001	8.87461	7.88633	8.72225	NA
Q8C0W0	Isoform of A2AF31, Thymosin beta 15b-like OS=Mus musculus OX=10090 GN=Tmsb15l PE=1 SV=1	Tmsb15l	0.826769	0.001371	0.0320198	+	0.004	3.064	38	1	1	0	1	80	9.2	6.13	2.57	7.45999	8.44543	7.2899	8.29852	7.61428	8.11318	7.64762	8.30721	7.45079	8.43209	NA
E0CYV9	Uncharacterized protein C4orf54 homolog OS=Mus musculus OX=10090 PE=1 SV=1	NA	0.819383	0.00261496	0.0388989	+	0	27.632	5	7	8	7	7	1786	189.6	8.57	26.34	9.90718	11.2043	10.1956	10.976	10.5216	11.1261	10.4771	11.1948	10.1738	10.8712	NA
P97355	Spermine synthase OS=Mus musculus OX=10090 GN=Sms PE=1 SV=1	Sms	0.80334	0.00281249	0.039639	+	0	57.981	34	11	29	1	11	366	41.3	5.06	97.22	12.2355	13.5251	12.5801	13.2732	12.6761	13.4121	12.7647	13.4239	12.6555	13.2942	REACTOME_METABOLISM_OF_AMINO_ACIDS_AND_DERIVATIVES|REACTOME_METABOLISM_OF_POLYAMINES
Q91VK1	eIF5-mimic protein 1 OS=Mus musculus OX=10090 GN=Bzw2 PE=1 SV=1	Bzw2	0.789194	0.000363835	0.0194562	+	0	32.818	23	10	13	2	9	419	48	6.68	38.11	10.9225	11.9295	11.091	11.9968	11.2335	11.8935	11.2902	11.9958	11.1601	11.8276	NA
A0A1Y7VKC6	Isoform of Q9DB29, Isoamyl acetate-hydrolyzing esterase 1 homolog (Fragment) OS=Mus musculus OX=10090 GN=Iah1 PE=1 SV=1	Iah1	0.782941	0.000176748	0.0160677	+	0.004	3.443	7	1	1	0	1	185	20.3	8.18	3.14	7.55604	8.4095	7.42486	8.3425	7.79853	8.37737	7.55354	8.29728	7.44283	8.26386	NA
P32233	Developmentally-regulated GTP-binding protein 1 OS=Mus musculus OX=10090 GN=Drg1 PE=1 SV=1	Drg1	0.781785	0.000441409	0.0213175	+	0	21.214	11	4	5	3	4	367	40.5	8.9	17.78	10.2453	11.014	10.2509	10.8479	9.97328	10.9567	10.0328	10.941	10.1443	10.7958	NA
D3Z4U8	Isoform of Q91VU6, DDB1- and CUL4-associated factor 11 OS=Mus musculus OX=10090 GN=Dcaf11 PE=1 SV=1	Dcaf11	0.779027	0.00170607	0.0347358	+	0	11.607	7	2	3	0	2	509	57.9	7.46	13.42	8.27969	9.36004	8.43232	9.20087	8.79803	9.32463	8.75895	9.34349	8.42054	9.35564	REACTOME_NEDDYLATION|REACTOME_POST_TRANSLATIONAL_PROTEIN_MODIFICATION
Q63810	Calcineurin subunit B type 1 OS=Mus musculus OX=10090 GN=Ppp3r1 PE=1 SV=3	Ppp3r1	0.771371	0.0012743	0.0319589	+	0	49.593	67	9	13	0	9	170	19.3	4.81	46.73	10.7103	11.8429	10.8567	11.5875	11.0784	11.7095	11.1617	11.7587	10.8196	11.5849	REACTOME_ACTIVATION_OF_BAD_AND_TRANSLOCATION_TO_MITOCHONDRIA_|REACTOME_ACTIVATION_OF_BH3_ONLY_PROTEINS|REACTOME_ADAPTIVE_IMMUNE_SYSTEM|REACTOME_BETA_CATENIN_INDEPENDENT_WNT_SIGNALING|REACTOME_C_TYPE_LECTIN_RECEPTORS_CLRS_|REACTOME_CA2_PATHWAY|REACTOME_CALCINEURIN_ACTIVATES_NFAT|REACTOME_CLEC7A_DECTIN_1_INDUCES_NFAT_ACTIVATION|REACTOME_CLEC7A_DECTIN_1_SIGNALING|REACTOME_DARPP_32_EVENTS|REACTOME_DO…
P47758	Signal recognition particle receptor subunit beta OS=Mus musculus OX=10090 GN=Srprb PE=1 SV=1	Srprb	0.770956	0.000966293	0.0286926	+	0	51.999	42	10	16	9	10	269	29.6	9.28	54.36	10.827	11.9398	11.0643	11.7886	11.2113	11.8174	11.2962	11.9648	11.0135	11.7566	REACTOME_IRE1ALPHA_ACTIVATES_CHAPERONES|REACTOME_SRP_DEPENDENT_COTRANSLATIONAL_PROTEIN_TARGETING_TO_MEMBRANE|REACTOME_TRANSLATION|REACTOME_UNFOLDED_PROTEIN_RESPONSE_UPR_
P61021	Ras-related protein Rab-5B OS=Mus musculus OX=10090 GN=Rab5b PE=1 SV=1	Rab5b	0.740929	5.71862e-05	0.0116169	+	0	44.771	32	6	19	2	2	215	23.7	8.13	60.37	9.25813	10.105	9.17343	9.96431	9.38267	10.0249	9.32574	10.1057	9.32911	9.97378	REACTOME_CLATHRIN_MEDIATED_ENDOCYTOSIS|REACTOME_INNATE_IMMUNE_SYSTEM|REACTOME_MEMBRANE_TRAFFICKING|REACTOME_NEUTROPHIL_DEGRANULATION|REACTOME_POST_TRANSLATIONAL_PROTEIN_MODIFICATION|REACTOME_RAB_GEFS_EXCHANGE_GTP_FOR_GDP_ON_RABS|REACTOME_RAB_GERANYLGERANYLATION|REACTOME_RAB_REGULATION_OF_TRAFFICKING|REACTOME_TBC_RABGAPS|REACTOME_VESICLE_MEDIATED_TRANSPORT
Q3TCH7	Cullin-4A OS=Mus musculus OX=10090 GN=Cul4a PE=1 SV=1	Cul4a	0.738583	0.00186442	0.0348785	+	0	75.254	25	17	25	9	12	759	87.7	8.35	85.4	11.9304	13.073	12.1854	12.8321	12.3208	12.9577	12.4166	13.0429	12.1992	12.8396	REACTOME_DNA_DAMAGE_BYPASS|REACTOME_DNA_DAMAGE_RECOGNITION_IN_GG_NER|REACTOME_DNA_REPAIR|REACTOME_DUAL_INCISION_IN_GG_NER|REACTOME_DUAL_INCISION_IN_TC_NER|REACTOME_FORMATION_OF_INCISION_COMPLEX_IN_GG_NER|REACTOME_FORMATION_OF_TC_NER_PRE_INCISION_COMPLEX|REACTOME_GLOBAL_GENOME_NUCLEOTIDE_EXCISION_REPAIR_GG_NER_|REACTOME_NEDDYLATION|REACTOME_NUCLEOTIDE_EXCISION_REPAIR|REACTOME_POST_TRANSLATIONAL_PR…
Q62446	Peptidyl-prolyl cis-trans isomerase FKBP3 OS=Mus musculus OX=10090 GN=Fkbp3 PE=1 SV=2	Fkbp3	0.732569	0.00466448	0.0489563	+	0	100.109	58	14	34	1	14	224	25.1	9.28	116.74	12.5936	13.7845	12.8314	13.67	12.9381	13.5029	13.1284	13.6913	12.8911	13.3968	NA
E9QA62	Leiomodin-3 OS=Mus musculus OX=10090 GN=Lmod3 PE=1 SV=1	Lmod3	0.727428	0.000355736	0.0194562	+	0	63.909	26	12	16	12	12	571	65.6	5.22	49.2	10.9959	11.8564	11.0622	11.7386	11.0179	11.8917	11.0706	11.773	11.0018	11.526	NA
Q3TRM4	Patatin-like phospholipase domain-containing protein 6 OS=Mus musculus OX=10090 GN=Pnpla6 PE=1 SV=2	Pnpla6	0.720698	0.000321383	0.0192769	+	0.001	5.191	3	3	3	0	3	1355	149.4	7.83	2.3	6.96011	7.69293	6.90387	7.69479	7.19962	7.81072	7.10975	7.6702	6.80516	7.71335	REACTOME_GLYCEROPHOSPHOLIPID_CATABOLISM|REACTOME_METABOLISM_OF_LIPIDS|REACTOME_PHOSPHOLIPID_METABOLISM|REACTOME_PI_METABOLISM
D3Z4S3	Putative peptidyl-tRNA hydrolase PTRHD1 OS=Mus musculus OX=10090 GN=Ptrhd1 PE=1 SV=1	Ptrhd1	0.719664	0.001309	0.0319589	+	0	12.892	22	3	4	3	3	140	16	9.32	12.42	8.86557	9.60093	8.85234	9.78046	9.26287	9.67767	9.19	9.84759	9.0239	9.88636	NA
Q3TIV5	Zinc finger CCCH domain-containing protein 15 OS=Mus musculus OX=10090 GN=Zc3h15 PE=1 SV=2	Zc3h15	0.703353	2.00648e-05	0.0084688	+	0	33.437	18	7	8	3	7	426	48.3	5.3	32.71	10.695	11.314	10.5846	11.3147	10.6197	11.3388	10.5401	11.3324	10.5541	11.2104	NA
Q9ER72	Cysteine--tRNA ligase, cytoplasmic OS=Mus musculus OX=10090 GN=Cars1 PE=1 SV=2	Cars1	0.698645	0.000604818	0.0237047	+	0	70.215	21	15	18	0	15	831	94.8	6.76	56.3	10.5789	11.5531	10.7666	11.3903	10.8052	11.3717	10.8604	11.5305	10.7275	11.3863	NA
V9GWU9	Isoform of Q8BH70, F-box/LRR-repeat protein 4 OS=Mus musculus OX=10090 GN=Fbxl4 PE=1 SV=1	Fbxl4	0.694053	7.16124e-05	0.0120624	+	0.002	3.897	3	1	1	0	1	290	33	5.49	3.92	8.12828	8.70801	8.08834	8.7095	8.21417	8.95233	8.19454	8.92077	8.1855	8.99049	REACTOME_ADAPTIVE_IMMUNE_SYSTEM|REACTOME_ANTIGEN_PROCESSING_UBIQUITINATION_PROTEASOME_DEGRADATION|REACTOME_CLASS_I_MHC_MEDIATED_ANTIGEN_PROCESSING_PRESENTATION|REACTOME_NEDDYLATION|REACTOME_POST_TRANSLATIONAL_PROTEIN_MODIFICATION
Q8BYH7	TBC1 domain family member 17 OS=Mus musculus OX=10090 GN=Tbc1d17 PE=1 SV=2	Tbc1d17	0.686056	1.12227e-05	0.00598481	+	0.001	8.471	4	2	2	1	2	645	72.8	5.25	6.65	7.41058	8.1551	7.41736	8.05333	7.52769	8.22124	7.52321	8.25973	7.4499	8.06961	REACTOME_MEMBRANE_TRAFFICKING|REACTOME_RAB_REGULATION_OF_TRAFFICKING|REACTOME_TBC_RABGAPS|REACTOME_VESICLE_MEDIATED_TRANSPORT
Q9CZW4	Fatty acid CoA ligase Acsl3 OS=Mus musculus OX=10090 GN=Acsl3 PE=1 SV=2	Acsl3	0.679346	0.000880948	0.0273975	+	0	44.249	13	8	13	0	6	720	80.4	8.54	37.01	10.4758	11.4321	10.6617	11.3733	10.7811	11.4252	10.6873	11.2348	10.843	11.3803	REACTOME_FATTY_ACID_METABOLISM|REACTOME_FATTY_ACYL_COA_BIOSYNTHESIS|REACTOME_FREE_FATTY_ACIDS_REGULATE_INSULIN_SECRETION|REACTOME_INTEGRATION_OF_ENERGY_METABOLISM|REACTOME_METABOLISM_OF_LIPIDS|REACTOME_REGULATION_OF_INSULIN_SECRETION|REACTOME_SYNTHESIS_OF_VERY_LONG_CHAIN_FATTY_ACYL_COAS
Q91YN9	BAG family molecular chaperone regulator 2 OS=Mus musculus OX=10090 GN=Bag2 PE=1 SV=1	Bag2	0.675137	6.33779e-05	0.0116169	+	0	19.055	26	5	5	5	5	210	23.5	6.42	17.36	10.0916	10.6618	10.0075	10.6106	10.1832	10.8845	10.0137	10.735	9.8111	10.5908	REACTOME_CELLULAR_RESPONSE_TO_HEAT_STRESS|REACTOME_CELLULAR_RESPONSES_TO_EXTERNAL_STIMULI|REACTOME_REGULATION_OF_HSF1_MEDIATED_HEAT_SHOCK_RESPONSE
Q8BUK6	Protein Hook homolog 3 OS=Mus musculus OX=10090 GN=Hook3 PE=1 SV=2	Hook3	0.673466	0.00061976	0.023733	+	0	40.475	14	10	11	7	10	718	83.2	5.19	35.55	10.5668	11.4582	10.6885	11.461	10.7657	11.2849	10.8493	11.4644	10.7117	11.2808	NA
P54731	FAS-associated factor 1 OS=Mus musculus OX=10090 GN=Faf1 PE=1 SV=2	Faf1	0.672803	7.70937e-05	0.0120624	+	0	7.583	4	2	3	2	2	649	73.8	4.86	10.27	8.51292	9.19303	8.49889	9.08459	8.72379	9.31351	8.66303	9.36709	8.38522	9.18965	NA
O54929	WD repeat and SOCS box-containing protein 2 OS=Mus musculus OX=10090 GN=Wsb2 PE=2 SV=2	Wsb2	0.663726	0.00241635	0.0378889	+	0.005	2.81	2	1	1	0	1	404	45.2	8.06	3.42	7.36477	8.35269	7.43809	8.19889	7.68955	8.21857	7.64181	8.07369	7.60453	8.21354	REACTOME_NEDDYLATION|REACTOME_POST_TRANSLATIONAL_PROTEIN_MODIFICATION
Q99KI3	ER membrane protein complex subunit 3 OS=Mus musculus OX=10090 GN=Emc3 PE=1 SV=3	Emc3	0.660335	0.000575624	0.0236206	+	0	24.225	18	4	6	4	4	261	30	6.81	19.69	9.79918	10.6414	9.93821	10.5981	10.2079	10.6468	10.0924	10.7207	9.84323	10.5755	NA
A2CG35	Isoform of P35283, Ras-related protein Rab-12 OS=Mus musculus OX=10090 GN=Rab12 PE=1 SV=1	Rab12	0.658875	0.0022512	0.0373564	+	0	34.814	24	9	12	0	8	291	32.2	8.84	32.49	10.2606	11.193	10.4331	11.0337	10.676	11.0975	10.8018	11.3218	10.5928	11.4128	REACTOME_MEMBRANE_TRAFFICKING|REACTOME_POST_TRANSLATIONAL_PROTEIN_MODIFICATION|REACTOME_RAB_GEFS_EXCHANGE_GTP_FOR_GDP_ON_RABS|REACTOME_RAB_GERANYLGERANYLATION|REACTOME_RAB_REGULATION_OF_TRAFFICKING|REACTOME_VESICLE_MEDIATED_TRANSPORT
A0A0G2JFB2	Isoform of Q80VL1, Tudor and KH domain-containing protein OS=Mus musculus OX=10090 GN=Tdrkh PE=1 SV=1	Tdrkh	0.657129	0.00193211	0.0349376	+	0	12.951	6	2	2	0	2	556	61.6	4.89	8.84	7.28514	7.77858	7.15709	7.98222	7.62091	8.11462	7.3893	7.93836	7.25391	8.17822	REACTOME_GENE_SILENCING_BY_RNA|REACTOME_PIWI_INTERACTING_RNA_PIRNA_BIOGENESIS
P60824	Cold-inducible RNA-binding protein OS=Mus musculus OX=10090 GN=Cirbp PE=1 SV=1	Cirbp	0.657097	0.000132039	0.0146375	+	0	19.363	27	3	3	0	3	172	18.6	9.61	12.31	8.76208	9.48352	8.71556	9.23352	8.64829	9.40068	8.71338	9.4249	8.82208	9.40425	NA
Q9DC50	Peroxisomal carnitine O-octanoyltransferase OS=Mus musculus OX=10090 GN=Crot PE=1 SV=1	Crot	0.655877	0.00145826	0.0326396	+	0	24.289	8	6	9	6	6	612	70.2	6.73	27.55	10.5111	11.4096	10.6379	11.2948	10.9074	11.3086	10.823	11.3905	10.7168	11.4722	REACTOME_BETA_OXIDATION_OF_PRISTANOYL_COA|REACTOME_FATTY_ACID_METABOLISM|REACTOME_METABOLISM_OF_LIPIDS|REACTOME_PEROXISOMAL_LIPID_METABOLISM|REACTOME_PEROXISOMAL_PROTEIN_IMPORT|REACTOME_PROTEIN_LOCALIZATION
A0A087WR45	Proline-rich basic protein 1 OS=Mus musculus OX=10090 GN=Prob1 PE=1 SV=1	Prob1	0.647605	0.000777425	0.0258079	+	0	24.279	7	4	5	0	4	1010	106.8	9.55	25.22	8.90799	9.73442	9.13414	9.83373	9.2252	9.94865	9.17918	9.75022	9.08923	9.50675	NA
Q91WU5	Arsenite methyltransferase OS=Mus musculus OX=10090 GN=As3mt PE=1 SV=2	As3mt	0.646765	0.00235101	0.0377396	+	0	54.172	36	11	19	4	11	376	41.8	5.86	56.97	11.1854	12.1916	11.4541	12.0785	11.6321	12.0875	11.701	12.2618	11.4292	12.0162	REACTOME_BIOLOGICAL_OXIDATIONS|REACTOME_METHYLATION|REACTOME_PHASE_II_CONJUGATION_OF_COMPOUNDS
Q9CQN1	Heat shock protein 75 kDa, mitochondrial OS=Mus musculus OX=10090 GN=Trap1 PE=1 SV=1	Trap1	0.646195	0.00350818	0.043008	+	0	99.513	30	17	36	16	16	706	80.2	6.68	123.65	11.7523	12.8074	12.0299	12.6171	12.2061	12.6897	12.3071	12.8103	11.9092	12.511	REACTOME_RESPIRATORY_ELECTRON_TRANSPORT|REACTOME_RESPIRATORY_ELECTRON_TRANSPORT_ATP_SYNTHESIS_BY_CHEMIOSMOTIC_COUPLING_AND_HEAT_PRODUCTION_BY_UNCOUPLING_PROTEINS_|REACTOME_THE_CITRIC_ACID_TCA_CYCLE_AND_RESPIRATORY_ELECTRON_TRANSPORT
Q8CCJ3	E3 UFM1-protein ligase 1 OS=Mus musculus OX=10090 GN=Ufl1 PE=1 SV=2	Ufl1	0.646102	0.000213526	0.0166017	+	0	36.591	11	8	8	0	8	793	89.5	6.67	27.82	10.1373	10.9496	10.2142	10.7908	10.1447	10.8328	10.2318	10.8678	10.1685	10.6861	REACTOME_ADAPTIVE_IMMUNE_SYSTEM|REACTOME_ANTIGEN_PROCESSING_UBIQUITINATION_PROTEASOME_DEGRADATION|REACTOME_CLASS_I_MHC_MEDIATED_ANTIGEN_PROCESSING_PRESENTATION
Q9JIP4	Pannexin-1 OS=Mus musculus OX=10090 GN=Panx1 PE=1 SV=3	Panx1	0.645916	0.000740358	0.0254347	+	0.001	7.614	6	1	1	1	1	426	48.1	7.03	5.49	5.93481	6.3925	5.9091	6.44209	6.07666	6.78089	5.90017	6.58039	5.71101	6.56545	REACTOME_ELECTRIC_TRANSMISSION_ACROSS_GAP_JUNCTIONS|REACTOME_INFLAMMASOMES|REACTOME_INNATE_IMMUNE_SYSTEM|REACTOME_NEURONAL_SYSTEM|REACTOME_NUCLEOTIDE_BINDING_DOMAIN_LEUCINE_RICH_REPEAT_CONTAINING_RECEPTOR_NLR_SIGNALING_PATHWAYS|REACTOME_THE_NLRP3_INFLAMMASOME
Q9CZ57	Isoform of C4P6S0, 5-methylcytosine rRNA methyltransferase NSUN4 OS=Mus musculus OX=10090 GN=Nsun4 PE=1 SV=1	Nsun4	0.643964	0.000113517	0.0139744	+	0.001	4.215	3	1	1	0	1	381	42.8	8.25	4.04	7.84749	8.53805	7.81173	8.37713	7.99254	8.58438	8.00953	8.59064	7.65212	8.44303	REACTOME_METABOLISM_OF_RNA|REACTOME_RRNA_MODIFICATION_IN_THE_MITOCHONDRION|REACTOME_RRNA_PROCESSING|REACTOME_RRNA_PROCESSING_IN_THE_MITOCHONDRION
Q99JN2	Kelch-like protein 22 OS=Mus musculus OX=10090 GN=Klhl22 PE=1 SV=1	Klhl22	0.640474	0.000777383	0.0258079	+	0	22.716	11	5	7	0	5	634	71.6	5.71	22.22	9.49035	10.3756	9.61238	10.198	9.87184	10.3865	9.823	10.3413	9.60167	10.3003	REACTOME_ADAPTIVE_IMMUNE_SYSTEM|REACTOME_ANTIGEN_PROCESSING_UBIQUITINATION_PROTEASOME_DEGRADATION|REACTOME_CLASS_I_MHC_MEDIATED_ANTIGEN_PROCESSING_PRESENTATION|REACTOME_NEDDYLATION|REACTOME_POST_TRANSLATIONAL_PROTEIN_MODIFICATION
Q9D4V7	Rab-like protein 3 OS=Mus musculus OX=10090 GN=Rabl3 PE=1 SV=1	Rabl3	0.635371	0.000229328	0.0173865	+	0.001	4.994	6	2	2	1	2	236	26.3	7.15	5.4	7.94836	8.46368	7.86536	8.62532	8.07445	8.60695	7.7345	8.47201	7.81259	8.44416	NA
A2A4P4	Gm27029 readthrough, Predicted gene, 27029 OS=Mus musculus OX=10090 GN=Gm27029 PE=3 SV=1	Gm27029	0.634698	0.000511549	0.0225578	+	0	27.285	20	8	9	0	8	543	60.5	5.78	28.58	9.94069	10.7116	10.1374	10.6973	10.3658	10.8023	10.2432	10.9016	10.1097	10.8574	NA
Q8R1Q8	Cytoplasmic dynein 1 light intermediate chain 1 OS=Mus musculus OX=10090 GN=Dync1li1 PE=1 SV=1	Dync1li1	0.632211	0.00119076	0.0311336	+	0	74.627	31	16	24	15	15	523	56.6	6.42	86.39	12.1527	13.0584	12.3114	12.9531	12.2682	12.9084	12.3954	12.9031	12.3045	12.7705	REACTOME_ADAPTIVE_IMMUNE_SYSTEM|REACTOME_AGGREPHAGY|REACTOME_ASPARAGINE_N_LINKED_GLYCOSYLATION|REACTOME_AUTOPHAGY|REACTOME_CELL_CYCLE|REACTOME_CELL_CYCLE_CHECKPOINTS|REACTOME_CELL_CYCLE_MITOTIC|REACTOME_CELLULAR_RESPONSES_TO_EXTERNAL_STIMULI|REACTOME_COPI_INDEPENDENT_GOLGI_TO_ER_RETROGRADE_TRAFFIC|REACTOME_COPI_MEDIATED_ANTEROGRADE_TRANSPORT|REACTOME_DISEASE|REACTOME_ER_TO_GOLGI_ANTEROGRADE_TRANS…
B1AQW2	Isoform of P10637, Microtubule-associated protein OS=Mus musculus OX=10090 GN=Mapt PE=1 SV=1	Mapt	0.629279	0.0011676	0.0310773	+	0	69.333	32	11	27	1	1	390	40.9	9.64	92.43	6.91791	7.52708	7.00077	7.63048	6.98106	7.85511	7.11689	7.51075	6.84841	7.48802	REACTOME_ACTIVATION_OF_AMPK_DOWNSTREAM_OF_NMDARS|REACTOME_ACTIVATION_OF_NMDA_RECEPTORS_AND_POSTSYNAPTIC_EVENTS|REACTOME_APOPTOTIC_CLEAVAGE_OF_CELLULAR_PROTEINS|REACTOME_APOPTOTIC_EXECUTION_PHASE|REACTOME_CASPASE_MEDIATED_CLEAVAGE_OF_CYTOSKELETAL_PROTEINS|REACTOME_NEURONAL_SYSTEM|REACTOME_NEUROTRANSMITTER_RECEPTORS_AND_POSTSYNAPTIC_SIGNAL_TRANSMISSION|REACTOME_PROGRAMMED_CELL_DEATH|REACTOME_TRANSM…
Q61187	Tumor susceptibility gene 101 protein OS=Mus musculus OX=10090 GN=Tsg101 PE=1 SV=2	Tsg101	0.627532	0.000152833	0.0146375	+	0	31.618	19	7	10	0	7	391	44.1	6.71	32.72	10.6536	11.4525	10.7173	11.3408	10.823	11.3774	10.8829	11.4885	10.7363	11.2915	REACTOME_ASSEMBLY_OF_THE_HIV_VIRION|REACTOME_AUTOPHAGY|REACTOME_BUDDING_AND_MATURATION_OF_HIV_VIRION|REACTOME_DISEASE|REACTOME_ENDOSOMAL_SORTING_COMPLEX_REQUIRED_FOR_TRANSPORT_ESCRT_|REACTOME_HCMV_INFECTION|REACTOME_HCMV_LATE_EVENTS|REACTOME_HIV_INFECTION|REACTOME_HIV_LIFE_CYCLE|REACTOME_INFECTIOUS_DISEASE|REACTOME_LATE_ENDOSOMAL_MICROAUTOPHAGY|REACTOME_MEMBRANE_TRAFFICKING|REACTOME_VESICLE_MEDIA…
P97384	Annexin A11 OS=Mus musculus OX=10090 GN=Anxa11 PE=1 SV=2	Anxa11	0.626255	0.0028518	0.0396501	+	0	106.238	38	20	36	5	19	503	54	7.66	119.07	12.1814	13.1427	12.4377	13.0681	12.6421	13.0161	12.6751	13.2099	12.4756	13.1064	NA
P61089	Ubiquitin-conjugating enzyme E2 N OS=Mus musculus OX=10090 GN=Ube2n PE=1 SV=1	Ube2n	0.626116	0.0045257	0.0482714	+	0	38.304	53	7	23	3	7	152	17.1	6.57	84.37	12.1147	13.1251	12.349	13.0065	12.4087	13.0013	12.5783	13.0974	12.4536	12.8047	REACTOME_ACTIVATED_TAK1_MEDIATES_P38_MAPK_ACTIVATION|REACTOME_ADAPTIVE_IMMUNE_SYSTEM|REACTOME_AGGREPHAGY|REACTOME_ANTIGEN_PROCESSING_UBIQUITINATION_PROTEASOME_DEGRADATION|REACTOME_ANTIVIRAL_MECHANISM_BY_IFN_STIMULATED_GENES|REACTOME_AUTOPHAGY|REACTOME_C_TYPE_LECTIN_RECEPTORS_CLRS_|REACTOME_CELL_CYCLE|REACTOME_CELL_CYCLE_CHECKPOINTS|REACTOME_CLASS_I_MHC_MEDIATED_ANTIGEN_PROCESSING_PRESENTATION|REA…
Q6RUT7	Protein CCSMST1 OS=Mus musculus OX=10090 GN=Ccsmst1 PE=1 SV=1	Ccsmst1	0.622203	0.00297756	0.0398425	+	0.014	2.305	18	1	1	1	1	136	15.3	4.93	2.89	5.83038	6.12434	5.8182	6.36134	5.71896	6.45864	5.65955	6.33601	5.39066	6.24843	NA
Q62348	Translin OS=Mus musculus OX=10090 GN=Tsn PE=1 SV=1	Tsn	0.619987	0.00178671	0.0348438	+	0	40.073	35	8	17	8	8	228	26.2	6.44	63.29	11.9113	12.8464	12.0494	12.6173	11.9936	12.5953	12.1322	12.6948	12.1482	12.5808	REACTOME_GENE_SILENCING_BY_RNA|REACTOME_SMALL_INTERFERING_RNA_SIRNA_BIOGENESIS
Q9DCS2	Methyltransferase-like 26 OS=Mus musculus OX=10090 GN=Mettl26 PE=1 SV=1	Mettl26	0.619151	0.00145479	0.0326396	+	0	40.073	50	8	13	0	8	204	22.7	6.52	46.4	10.4021	11.3297	10.5896	11.2026	10.7772	11.2997	10.8286	11.3566	10.6437	11.1484	NA
Q8CHP5	Partner of Y14 and mago OS=Mus musculus OX=10090 GN=Pym1 PE=1 SV=2	Pym1	0.618394	0.000862393	0.0269785	+	0.001	5.042	15	1	2	0	1	203	22.7	9.5	8.71	7.39298	7.86059	7.35067	7.95456	7.17171	7.95878	7.09054	7.85573	7.2878	7.75601	NA
D3Z7P4	Isoform of D3Z7P3, Glutaminase OS=Mus musculus OX=10090 GN=Gls PE=1 SV=1	Gls	0.616714	0.00191833	0.0349376	+	0	39.807	23	8	9	0	1	491	54.7	6.83	30.5	6.90484	7.40762	6.78839	7.5271	7.17998	7.51512	6.91627	7.66512	6.80653	7.56461	REACTOME_GLUTAMATE_AND_GLUTAMINE_METABOLISM|REACTOME_GLUTAMATE_NEUROTRANSMITTER_RELEASE_CYCLE|REACTOME_METABOLISM_OF_AMINO_ACIDS_AND_DERIVATIVES|REACTOME_NEURONAL_SYSTEM|REACTOME_NEUROTRANSMITTER_RELEASE_CYCLE|REACTOME_RNA_POLYMERASE_II_TRANSCRIPTION|REACTOME_TP53_REGULATES_METABOLIC_GENES|REACTOME_TRANSCRIPTIONAL_REGULATION_BY_TP53|REACTOME_TRANSMISSION_ACROSS_CHEMICAL_SYNAPSES
A0A2R8VKS6	Isoform of Q9D1C8, Vacuolar protein sorting-associated protein 28 homolog OS=Mus musculus OX=10090 GN=Vps28 PE=1 SV=1	Vps28	0.616039	0.00251495	0.0384	+	0	13.208	25	4	6	0	4	183	21.1	5.31	16.76	10.2956	10.571	10.0101	10.6878	10.2759	10.8682	10.0622	10.8141	10.0111	10.7941	REACTOME_ASSEMBLY_OF_THE_HIV_VIRION|REACTOME_AUTOPHAGY|REACTOME_BUDDING_AND_MATURATION_OF_HIV_VIRION|REACTOME_DISEASE|REACTOME_ENDOSOMAL_SORTING_COMPLEX_REQUIRED_FOR_TRANSPORT_ESCRT_|REACTOME_HCMV_INFECTION|REACTOME_HCMV_LATE_EVENTS|REACTOME_HIV_INFECTION|REACTOME_HIV_LIFE_CYCLE|REACTOME_INFECTIOUS_DISEASE|REACTOME_LATE_ENDOSOMAL_MICROAUTOPHAGY|REACTOME_MEMBRANE_TRAFFICKING|REACTOME_VESICLE_MEDIA…
Q9D517	1-acyl-sn-glycerol-3-phosphate acyltransferase gamma OS=Mus musculus OX=10090 GN=Agpat3 PE=1 SV=2	Agpat3	0.614719	0.000761783	0.0258079	+	0	60.784	23	9	15	9	9	376	43.3	8.51	62.67	11.1668	11.9934	11.4164	11.9115	11.3763	12.0589	11.4277	12.0395	11.3424	11.8	REACTOME_COPI_INDEPENDENT_GOLGI_TO_ER_RETROGRADE_TRAFFIC|REACTOME_GLYCEROPHOSPHOLIPID_BIOSYNTHESIS|REACTOME_GOLGI_TO_ER_RETROGRADE_TRANSPORT|REACTOME_INTRA_GOLGI_AND_RETROGRADE_GOLGI_TO_ER_TRAFFIC|REACTOME_MEMBRANE_TRAFFICKING|REACTOME_METABOLISM_OF_LIPIDS|REACTOME_PHOSPHOLIPID_METABOLISM|REACTOME_SYNTHESIS_OF_PA|REACTOME_VESICLE_MEDIATED_TRANSPORT
A0A1Y7VM96	Isoform of Q5RJG7, 2-C-methyl-D-erythritol 4-phosphate cytidylyltransferase-like protein OS=Mus musculus OX=10090 GN=Crppa PE=1 SV=1	Crppa	0.612691	0.0012273	0.0313945	+	0	11.747	10	2	3	0	2	397	43.6	6.46	15.67	7.47976	8.24841	7.61967	8.30453	7.90308	8.35932	7.90614	8.31544	7.38592	8.13034	NA
Q9CYG7	Mitochondrial import receptor subunit TOM34 OS=Mus musculus OX=10090 GN=Tomm34 PE=1 SV=1	Tomm34	0.610305	6.48106e-05	0.0116169	+	0	32.25	25	8	9	1	8	309	34.3	9.14	28.44	10.1808	10.8098	10.1209	10.7616	10.1228	10.7951	10.0524	10.6891	10.0936	10.5664	NA
Q3UHX2	28 kDa heat- and acid-stable phosphoprotein OS=Mus musculus OX=10090 GN=Pdap1 PE=1 SV=1	Pdap1	0.602055	0.00262096	0.0388989	+	0	30.818	32	6	15	6	6	181	20.6	7.39	46.17	12.2212	13.0827	12.2688	13.0122	12.2242	12.8137	12.4607	12.8637	12.2913	12.7043	REACTOME_INNATE_IMMUNE_SYSTEM|REACTOME_NEUTROPHIL_DEGRANULATION
P31938	Dual specificity mitogen-activated protein kinase kinase 1 OS=Mus musculus OX=10090 GN=Map2k1 PE=1 SV=2	Map2k1	0.601497	0.00271434	0.0393675	+	0	48.483	23	8	16	5	5	393	43.4	6.7	72.64	10.4549	10.7093	10.3265	11.1011	10.3633	10.9661	10.2108	10.9101	10.3272	11.0035	REACTOME_CYTOKINE_SIGNALING_IN_IMMUNE_SYSTEM|REACTOME_DEVELOPMENTAL_BIOLOGY|REACTOME_DISEASE|REACTOME_DISEASES_OF_SIGNAL_TRANSDUCTION_BY_GROWTH_FACTOR_RECEPTORS_AND_SECOND_MESSENGERS|REACTOME_FLT3_SIGNALING|REACTOME_INFECTIOUS_DISEASE|REACTOME_INNATE_IMMUNE_SYSTEM|REACTOME_INTERLEUKIN_1_FAMILY_SIGNALING|REACTOME_INTERLEUKIN_1_SIGNALING|REACTOME_INTERLEUKIN_17_SIGNALING|REACTOME_L1CAM_INTERACTIONS…
P97825	Jupiter microtubule associated homolog 1 OS=Mus musculus OX=10090 GN=Jpt1 PE=1 SV=3	Jpt1	0.600662	0.00234952	0.0377396	+	0	14.347	27	2	3	2	2	154	16.1	5.31	8.06	7.55556	7.97549	7.24353	7.66027	6.98485	7.80656	6.98275	7.53869	7.07265	7.86164	NA
A2AVR9	Isoform of P62627, Dynein light chain roadblock OS=Mus musculus OX=10090 GN=Dynlrb1 PE=1 SV=1	Dynlrb1	0.596267	0.000108016	0.0136691	+	0	34.593	70	6	9	0	6	104	11.9	6.06	26.72	9.962	10.5609	9.86679	10.3854	9.8017	10.503	9.75704	10.4192	9.77378	10.2742	REACTOME_CILIUM_ASSEMBLY|REACTOME_INTRAFLAGELLAR_TRANSPORT|REACTOME_ORGANELLE_BIOGENESIS_AND_MAINTENANCE
P31786	Acyl-CoA-binding protein OS=Mus musculus OX=10090 GN=Dbi PE=1 SV=2	Dbi	0.595247	0.00230664	0.037548	+	0	44.098	55	5	47	0	5	87	10	8.82	168.41	12.6924	13.6113	12.9771	13.5969	12.9433	13.462	13.2271	13.6708	12.8883	13.3634	REACTOME_FATTY_ACID_METABOLISM|REACTOME_METABOLISM_OF_LIPIDS|REACTOME_MITOCHONDRIAL_FATTY_ACID_BETA_OXIDATION
E9Q8N5	Isoform of Q8BRT1, CLIP-associating protein 2 OS=Mus musculus OX=10090 GN=Clasp2 PE=1 SV=1	Clasp2	0.593705	0.000616621	0.023733	+	0	16.808	4	4	5	0	2	1286	140.6	8.63	16.02	8.47301	8.88686	8.32253	8.92498	8.47699	8.99586	8.2578	8.92113	8.25007	9.02009	REACTOME_ANCHORING_OF_THE_BASAL_BODY_TO_THE_PLASMA_MEMBRANE|REACTOME_AURKA_ACTIVATION_BY_TPX2|REACTOME_CELL_CYCLE|REACTOME_CELL_CYCLE_CHECKPOINTS|REACTOME_CELL_CYCLE_MITOTIC|REACTOME_CILIUM_ASSEMBLY|REACTOME_DEVELOPMENTAL_BIOLOGY|REACTOME_M_PHASE|REACTOME_MITOTIC_G2_G2_M_PHASES|REACTOME_MITOTIC_METAPHASE_AND_ANAPHASE|REACTOME_MITOTIC_PROMETAPHASE|REACTOME_MITOTIC_SPINDLE_CHECKPOINT|REACTOME_NERVO…
Q6PEE2	CBP80/20-dependent translation initiation factor OS=Mus musculus OX=10090 GN=Ctif PE=1 SV=2	Ctif	0.591433	0.000136691	0.0146375	+	0.006	2.697	1	1	1	0	1	600	67.8	6.65	2.63	7.06286	7.51476	6.96577	7.57724	7.13731	7.72893	6.82944	7.4216	6.87742	7.58743	NA
Q9D8S9	BolA-like protein 1 OS=Mus musculus OX=10090 GN=Bola1 PE=1 SV=1	Bola1	0.590974	0.00279488	0.039639	+	0	37.889	28	2	8	2	2	137	14.4	8.76	37.85	9.4994	10.3214	9.65752	10.367	9.95221	10.3012	9.94056	10.3541	9.6322	10.2931	NA
E9QJT5	Isoform of P56376, Acylphosphatase OS=Mus musculus OX=10090 GN=Acyp1 PE=1 SV=1	Acyp1	0.588706	0.0046464	0.0489404	+	0	22.842	31	5	6	0	5	157	17.3	9.13	16.54	9.85286	10.7943	10.0578	10.7429	10.324	10.6814	10.3141	10.7665	10.0155	10.5226	NA
Q9EP72	ER membrane protein complex subunit 7 OS=Mus musculus OX=10090 GN=Emc7 PE=1 SV=1	Emc7	0.587353	0.0010525	0.0291954	+	0	29.453	35	5	9	5	5	241	26.3	9.23	21.35	10.2348	11.0397	10.3688	10.9182	10.6214	11.0057	10.5749	11.1225	10.4061	11.0569	NA
Q8BXX3	Isoform of Q9CXY9, GPI-anchor transamidase OS=Mus musculus OX=10090 GN=Pigk PE=1 SV=1	Pigk	0.583285	0.000346692	0.0194562	+	0	11.113	7	2	3	0	2	364	41	5.54	10.41	9.28807	10.0313	9.38388	9.80483	9.42501	10.0241	9.41869	10.0153	9.4608	10.0173	REACTOME_ATTACHMENT_OF_GPI_ANCHOR_TO_UPAR|REACTOME_POST_TRANSLATIONAL_MODIFICATION_SYNTHESIS_OF_GPI_ANCHORED_PROTEINS|REACTOME_POST_TRANSLATIONAL_PROTEIN_MODIFICATION
Q9JHU2	Palmdelphin OS=Mus musculus OX=10090 GN=Palmd PE=1 SV=1	Palmd	0.582345	0.000420522	0.0205361	+	0	23.9	8	3	6	0	3	551	62.7	5.66	21.13	8.81529	9.47854	8.90087	9.39498	8.75273	9.49414	8.82383	9.27004	8.71167	9.27841	NA
Q8K3A2	tRNA 2'-phosphotransferase 1 OS=Mus musculus OX=10090 GN=Trpt1 PE=2 SV=2	Trpt1	0.581051	0.0027932	0.039639	+	0.004	3.027	3	1	1	1	1	249	27.3	10.1	2.8	6.1358	6.5097	5.95363	6.53546	6.2821	6.67435	5.97668	6.76706	6.18753	6.95443	NA
Q9CS72	Filamin-A-interacting protein 1 OS=Mus musculus OX=10090 GN=Filip1 PE=1 SV=2	Filip1	0.578403	0.00217661	0.0373167	+	0	60.537	15	13	18	0	1	1211	137.5	8.19	44.32	6.5802	6.86443	6.22238	6.94858	6.25362	6.97055	6.10465	6.62205	6.13201	6.77926	NA
B2RVY9	Transmembrane protein 182 OS=Mus musculus OX=10090 GN=Tmem182 PE=1 SV=1	Tmem182	0.570871	0.000284584	0.0182205	+	0	7.423	11	2	3	2	2	229	25.8	7.18	7.5	8.05205	8.79665	8.26433	8.81822	8.42417	8.87464	8.37773	8.91786	8.27882	8.8441	NA
P97471	Mothers against decapentaplegic homolog 4 OS=Mus musculus OX=10090 GN=Smad4 PE=1 SV=2	Smad4	0.56952	0.000629127	0.0238302	+	0	32.552	16	6	7	6	6	551	60.3	6.99	23.96	8.71109	9.35296	8.69952	9.2322	8.94031	9.35806	8.80428	9.3047	8.6233	9.3782	REACTOME_DEUBIQUITINATION|REACTOME_DEVELOPMENTAL_BIOLOGY|REACTOME_DISEASE|REACTOME_DISEASES_OF_SIGNAL_TRANSDUCTION_BY_GROWTH_FACTOR_RECEPTORS_AND_SECOND_MESSENGERS|REACTOME_DOWNREGULATION_OF_SMAD2_3_SMAD4_TRANSCRIPTIONAL_ACTIVITY|REACTOME_FOXO_MEDIATED_TRANSCRIPTION|REACTOME_FOXO_MEDIATED_TRANSCRIPTION_OF_CELL_CYCLE_GENES|REACTOME_FOXO_MEDIATED_TRANSCRIPTION_OF_OXIDATIVE_STRESS_METABOLIC_AND_NEUR…
O55057	Retinal rod rhodopsin-sensitive cGMP 3',5'-cyclic phosphodiesterase subunit delta OS=Mus musculus OX=10090 GN=Pde6d PE=1 SV=1	Pde6d	0.56781	6.04559e-06	0.00576057	+	0	13.693	21	2	2	1	2	150	17.3	5.67	8.95	7.92692	8.53054	7.88361	8.39977	8.00035	8.58058	7.91446	8.51851	7.85327	8.38825	REACTOME_CARGO_TRAFFICKING_TO_THE_PERICILIARY_MEMBRANE|REACTOME_CILIUM_ASSEMBLY|REACTOME_CYTOKINE_SIGNALING_IN_IMMUNE_SYSTEM|REACTOME_FLT3_SIGNALING|REACTOME_MAPK_FAMILY_SIGNALING_CASCADES|REACTOME_ORGANELLE_BIOGENESIS_AND_MAINTENANCE|REACTOME_RAS_PROCESSING
A0A1L1SSA8	Isoform of Q91XE8, Transmembrane protein 205 (Fragment) OS=Mus musculus OX=10090 GN=Tmem205 PE=1 SV=1	Tmem205	0.560954	0.00160924	0.0342051	+	0.001	7.835	5	1	3	0	1	173	19.6	9.41	8.63	8.91937	9.68187	9.00969	9.54594	9.0641	9.71401	9.07176	9.61057	9.00307	9.32039	NA
H3BLL2	Isoform of Q811I0, ATP synthase mitochondrial F1 complex assembly factor 1 OS=Mus musculus OX=10090 GN=Atpaf1 PE=1 SV=1	Atpaf1	0.557846	0.00340125	0.0423455	+	0	20.764	17	5	5	0	5	348	38.8	5.86	19.42	9.67672	10.4646	9.98631	10.4429	10.1948	10.5887	10.4016	10.7897	9.86797	10.6307	NA
A2AQ17	Isoform of Q9CWX2, Complex I intermediate-associated protein 30, mitochondrial OS=Mus musculus OX=10090 GN=Ndufaf1 PE=1 SV=1	Ndufaf1	0.556992	0.000687594	0.0246242	+	0	28.526	17	6	8	0	6	328	37.8	8.6	27.73	10.0858	10.821	10.2593	10.8155	10.5338	10.9202	10.5321	11.0225	10.2653	10.8821	REACTOME_COMPLEX_I_BIOGENESIS|REACTOME_RESPIRATORY_ELECTRON_TRANSPORT|REACTOME_RESPIRATORY_ELECTRON_TRANSPORT_ATP_SYNTHESIS_BY_CHEMIOSMOTIC_COUPLING_AND_HEAT_PRODUCTION_BY_UNCOUPLING_PROTEINS_|REACTOME_THE_CITRIC_ACID_TCA_CYCLE_AND_RESPIRATORY_ELECTRON_TRANSPORT
Q9CQU0	Thioredoxin domain-containing protein 12 OS=Mus musculus OX=10090 GN=Txndc12 PE=1 SV=1	Txndc12	0.554023	0.00120274	0.031171	+	0	50.555	45	7	17	7	7	170	19	5.26	57.7	11.7792	12.5204	11.8514	12.3525	11.6441	12.2971	11.9063	12.4343	11.865	12.2119	NA
Q8C5W3	Tubulin-specific chaperone cofactor E-like protein OS=Mus musculus OX=10090 GN=Tbcel PE=1 SV=1	Tbcel	0.553823	0.000251607	0.0176993	+	0	17.992	21	6	7	0	6	424	48	5.53	19.15	10.0576	10.6204	10.16	10.7188	10.491	10.8869	10.3134	10.8882	10.1755	10.8523	NA
Q8CCN5	BCAS3 microtubule associated cell migration factor OS=Mus musculus OX=10090 GN=Bcas3 PE=1 SV=2	Bcas3	0.553298	0.00385269	0.0450134	+	0.001	6.519	2	2	2	0	2	928	101	6.7	6.07	7.14931	7.79553	7.30534	7.49356	7.26239	7.87282	7.23875	7.87646	7.07151	7.75541	NA
A2AJ88	Patatin-like phospholipase domain-containing protein 7 OS=Mus musculus OX=10090 GN=Pnpla7 PE=1 SV=1	Pnpla7	0.550674	0.00431418	0.0470684	+	0	30.845	6	7	9	0	7	1352	150.4	6.92	25.12	8.4828	9.19378	8.63749	9.32135	9.05874	9.32974	8.90271	9.27807	8.69074	9.40291	REACTOME_GLYCEROPHOSPHOLIPID_CATABOLISM|REACTOME_METABOLISM_OF_LIPIDS|REACTOME_PHOSPHOLIPID_METABOLISM|REACTOME_PI_METABOLISM
Q9JLR1	Protein transport protein Sec61 subunit alpha isoform 2 OS=Mus musculus OX=10090 GN=Sec61a2 PE=2 SV=3	Sec61a2	0.54542	0.00211996	0.0367312	+	0	13.154	8	4	4	1	1	476	52.2	8.06	10.38	6.12616	6.62058	6.37834	6.85471	6.70232	7.03231	6.53507	7.18032	6.21658	6.99765	REACTOME_ADAPTIVE_IMMUNE_SYSTEM|REACTOME_ANTIGEN_PROCESSING_CROSS_PRESENTATION|REACTOME_CLASS_I_MHC_MEDIATED_ANTIGEN_PROCESSING_PRESENTATION|REACTOME_SRP_DEPENDENT_COTRANSLATIONAL_PROTEIN_TARGETING_TO_MEMBRANE|REACTOME_TRANSLATION
Q9Z1R4	Uncharacterized protein C6orf47 homolog OS=Mus musculus OX=10090 GN=D17h6s53e PE=1 SV=1	D17h6s53e	0.545158	0.00226958	0.0373564	+	0.002	4.007	3	1	1	1	1	293	32	6.89	3.05	6.26022	6.79581	6.49547	6.86142	6.61005	7.31228	6.62557	7.00465	6.26506	7.00799	NA
A2AG30	Isoform of O89114, DnaJ homolog subfamily B member 5 OS=Mus musculus OX=10090 GN=Dnajb5 PE=1 SV=1	Dnajb5	0.545038	0.000921611	0.0275671	+	0	27.101	26	7	10	0	7	382	43	9.32	31.32	9.70425	10.4757	9.90532	10.4649	10.1496	10.5839	10.142	10.574	9.92802	10.4558	NA
Q8K2C9	Very-long-chain (3R)-3-hydroxyacyl-CoA dehydratase 3 OS=Mus musculus OX=10090 GN=Hacd3 PE=1 SV=2	Hacd3	0.543085	0.00280238	0.039639	+	0	20.4	17	6	6	6	6	362	43.1	9.13	20.33	9.61205	10.3186	9.60636	10.0333	9.47044	10.1783	9.54946	10.1407	9.53905	9.82199	REACTOME_FATTY_ACID_METABOLISM|REACTOME_FATTY_ACYL_COA_BIOSYNTHESIS|REACTOME_METABOLISM_OF_LIPIDS|REACTOME_SYNTHESIS_OF_VERY_LONG_CHAIN_FATTY_ACYL_COAS
Q64152	Transcription factor BTF3 OS=Mus musculus OX=10090 GN=Btf3 PE=1 SV=3	Btf3	0.540671	0.000143044	0.0146375	+	0	46.723	45	7	12	0	6	204	22	9.52	48.91	10.9124	11.4269	10.9555	11.4382	10.8123	11.4441	10.8541	11.4825	10.834	11.2799	NA
A0A0G2JFK4	Isoform of Q8K0C8, Cytochrome c oxidase assembly protein COX19 OS=Mus musculus OX=10090 GN=Cox19 PE=1 SV=1	Cox19	0.535114	6.74051e-05	0.0117146	+	0.009	2.537	14	1	2	0	1	69	8.1	7.61	0	7.45128	8.00107	7.31793	7.85951	7.52189	7.96943	7.44167	7.94188	7.37482	8.01126	REACTOME_MITOCHONDRIAL_PROTEIN_IMPORT|REACTOME_PROTEIN_LOCALIZATION
Q8K3C3	Protein LZIC OS=Mus musculus OX=10090 GN=Lzic PE=1 SV=1	Lzic	0.526434	0.00010459	0.0136691	+	0	31.179	37	7	8	3	7	190	21.5	4.96	30.21	10.1799	10.6824	10.1746	10.8157	10.4306	10.8725	10.3798	10.8674	10.161	10.7202	NA
Q9CWW6	Peptidyl-prolyl cis-trans isomerase NIMA-interacting 4 OS=Mus musculus OX=10090 GN=Pin4 PE=1 SV=1	Pin4	0.516809	3.95109e-05	0.0115045	+	0.001	8.931	21	3	4	3	3	131	13.8	9.77	9.77	8.81492	9.26706	8.72232	9.2845	8.79101	9.25359	8.64037	9.16281	8.65837	9.24309	NA
P63147	Ubiquitin-conjugating enzyme E2 B OS=Mus musculus OX=10090 GN=Ube2b PE=1 SV=1	Ube2b	0.514943	0.00122072	0.0313791	+	0	11.567	11	1	3	1	1	152	17.3	5.01	14.82	9.30762	9.91774	9.45645	9.94866	9.71996	10.0098	9.57482	10.1049	9.33735	9.98983	REACTOME_ADAPTIVE_IMMUNE_SYSTEM|REACTOME_ANTIGEN_PROCESSING_UBIQUITINATION_PROTEASOME_DEGRADATION|REACTOME_CLASS_I_MHC_MEDIATED_ANTIGEN_PROCESSING_PRESENTATION|REACTOME_DNA_DAMAGE_BYPASS|REACTOME_DNA_REPAIR|REACTOME_E3_UBIQUITIN_LIGASES_UBIQUITINATE_TARGET_PROTEINS|REACTOME_POST_TRANSLATIONAL_PROTEIN_MODIFICATION|REACTOME_PROTEIN_UBIQUITINATION|REACTOME_RECOGNITION_OF_DNA_DAMAGE_BY_PCNA_CONTAININ…
Q61335	B-cell receptor-associated protein 31 OS=Mus musculus OX=10090 GN=Bcap31 PE=1 SV=4	Bcap31	0.513311	0.00173883	0.0347358	+	0	74.778	31	11	45	11	11	245	27.9	8.7	129.28	12.7033	13.4437	12.8385	13.3346	12.7243	13.2716	12.9008	13.3704	12.8945	13.2074	REACTOME_ADAPTIVE_IMMUNE_SYSTEM|REACTOME_ANTIGEN_PRESENTATION_FOLDING_ASSEMBLY_AND_PEPTIDE_LOADING_OF_CLASS_I_MHC|REACTOME_APOPTOTIC_CLEAVAGE_OF_CELLULAR_PROTEINS|REACTOME_APOPTOTIC_EXECUTION_PHASE|REACTOME_CLASS_I_MHC_MEDIATED_ANTIGEN_PROCESSING_PRESENTATION|REACTOME_PROGRAMMED_CELL_DEATH
D3YXZ3	Isoform of O88448, Kinesin light chain OS=Mus musculus OX=10090 GN=Klc2 PE=1 SV=1	Klc2	0.51294	0.0018895	0.0348785	+	0	58.568	24	11	19	0	7	617	68.1	7.06	72.89	10.2247	10.9843	10.3885	10.9706	10.5383	10.9536	10.5858	10.9785	10.4613	10.8763	REACTOME_ADAPTIVE_IMMUNE_SYSTEM|REACTOME_COPI_DEPENDENT_GOLGI_TO_ER_RETROGRADE_TRAFFIC|REACTOME_FACTORS_INVOLVED_IN_MEGAKARYOCYTE_DEVELOPMENT_AND_PLATELET_PRODUCTION|REACTOME_GOLGI_TO_ER_RETROGRADE_TRANSPORT|REACTOME_HEMOSTASIS|REACTOME_INTRA_GOLGI_AND_RETROGRADE_GOLGI_TO_ER_TRAFFIC|REACTOME_KINESINS|REACTOME_MEMBRANE_TRAFFICKING|REACTOME_MHC_CLASS_II_ANTIGEN_PRESENTATION|REACTOME_RHO_GTPASE_EFFE…
Q9ET54	Palladin OS=Mus musculus OX=10090 GN=Palld PE=1 SV=2	Palld	0.509525	8.71963e-05	0.0128507	+	0	31.844	7	7	9	0	7	1408	152	6.25	24.05	10.079	10.5412	9.95078	10.5117	10.0032	10.541	9.96678	10.5433	10.0554	10.4656	NA
Q8C7X2-2	Isoform of Q8C7X2, Isoform 2 of ER membrane protein complex subunit 1 OS=Mus musculus OX=10090 GN=Emc1 PE=1 SV=1	Emc1	0.509429	0.00307165	0.0406048	+	0	61.561	18	14	19	1	1	994	111.2	7.43	65.05	11.0437	11.8696	11.3035	11.6979	11.3475	11.7906	11.4363	11.8772	11.262	11.7047	NA
Q9DBT4	Ectonucleoside triphosphate diphosphohydrolase 4 OS=Mus musculus OX=10090 GN=Entpd4 PE=1 SV=1	Entpd4	0.508995	0.000145475	0.0146375	+	0.004	3.277	1	1	1	0	1	613	69.7	8.07	3.29	7.46661	7.97299	7.33925	7.76292	7.45039	7.90428	7.34928	7.87793	7.25391	7.8863	REACTOME_METABOLISM_OF_NUCLEOTIDES|REACTOME_NUCLEOBASE_CATABOLISM|REACTOME_PHOSPHATE_BOND_HYDROLYSIS_BY_NTPDASE_PROTEINS
Q9CPV4	Glyoxalase domain-containing protein 4 OS=Mus musculus OX=10090 GN=Glod4 PE=1 SV=1	Glod4	0.508477	0.00460847	0.0487491	+	0	85.87	45	11	30	0	11	298	33.3	5.47	103.46	11.7293	12.5515	11.8936	12.3792	11.8379	12.3607	12.0226	12.4563	11.9552	12.2334	NA
Q8C167	Prolyl endopeptidase-like OS=Mus musculus OX=10090 GN=Prepl PE=1 SV=1	Prepl	0.508234	0.000709812	0.0248182	+	0	25.807	10	5	6	0	5	725	83.1	6.65	23.72	9.21365	9.91961	9.36822	9.83075	9.44195	9.84336	9.34055	9.77783	9.24532	9.77932	NA
Q9CQH7	Transcription factor BTF3 homolog 4 OS=Mus musculus OX=10090 GN=Btf3l4 PE=1 SV=1	Btf3l4	0.507088	9.67355e-05	0.0136098	+	0	36.543	51	7	14	6	6	158	17.3	6.35	45.18	11.141	11.6646	11.0445	11.5662	11.0919	11.6491	11.061	11.6129	11.0144	11.3953	NA
D3YVA1	Isoform of Q80U30, Protein CLEC16A (Fragment) OS=Mus musculus OX=10090 GN=Clec16a PE=4 SV=1	Clec16a	0.505863	0.000846057	0.0269785	+	0.015	2.271	13	1	1	0	1	67	7.6	7.58	2.56	6.8029	7.45161	6.78061	7.32989	7.05327	7.41457	7.03261	7.41961	6.89171	7.47472	NA
Q80ZJ6	Protein zer-1 homolog OS=Mus musculus OX=10090 GN=Zer1 PE=1 SV=1	Zer1	0.501967	0.000280307	0.0182015	+	0.001	9.04	4	2	3	0	2	779	89	5.94	10.52	8.37353	9.01272	8.50832	8.98077	8.71996	9.10518	8.61865	9.09454	8.56784	9.10492	NA
O70378	ER membrane protein complex subunit 8 OS=Mus musculus OX=10090 GN=Emc8 PE=1 SV=1	Emc8	0.498703	0.000207294	0.0166017	+	0	23.104	23	4	6	0	4	207	23.3	6.15	18.23	9.46818	10.0173	9.524	9.9964	9.64818	10.0428	9.6763	10.1357	9.38701	10.0049	NA
E9Q6E0	Isoform of Q9ESN9, C-Jun-amino-terminal kinase-interacting protein 3 OS=Mus musculus OX=10090 GN=Mapk8ip3 PE=1 SV=1	Mapk8ip3	0.495684	0.00085704	0.0269785	+	0	7.468	2	3	3	0	1	1306	144.1	5.4	7.91	6.31054	6.61249	6.11917	6.70899	6.19653	6.80392	6.07849	6.60136	6.07202	6.5284	REACTOME_DEVELOPMENTAL_BIOLOGY|REACTOME_MYOGENESIS
P50427	Steryl-sulfatase OS=Mus musculus OX=10090 GN=Sts PE=1 SV=1	Sts	0.490265	0.000662973	0.0241706	+	0	17.525	8	4	5	4	4	624	66.5	8.5	15.76	8.73634	9.38608	8.79635	9.23933	8.96766	9.3131	8.90484	9.45133	8.90176	9.36844	REACTOME_GAMMA_CARBOXYLATION_HYPUSINE_FORMATION_AND_ARYLSULFATASE_ACTIVATION|REACTOME_GLYCOSPHINGOLIPID_METABOLISM|REACTOME_METABOLISM_OF_LIPIDS|REACTOME_POST_TRANSLATIONAL_PROTEIN_MODIFICATION|REACTOME_SPHINGOLIPID_METABOLISM|REACTOME_THE_ACTIVATION_OF_ARYLSULFATASES
A0A0A6YVV3	Isoform of Q9CQ79, Thioredoxin domain-containing protein 9 OS=Mus musculus OX=10090 GN=Txndc9 PE=1 SV=1	Txndc9	0.48751	0.000411356	0.0204261	+	0.001	7.908	13	2	2	0	2	141	16.4	5.19	6.18	8.75064	9.2717	8.705	9.14684	8.77029	9.34821	8.68124	9.24366	8.80512	9.13942	NA
B2RXC8	3222402P14Rik protein OS=Mus musculus OX=10090 GN=Ppp2r3a PE=1 SV=1	Ppp2r3a	0.486651	0.00295464	0.0398425	+	0.004	3.033	1	1	1	1	1	1150	130.2	5.2	2.21	5.51937	5.78161	5.35222	5.98466	5.54189	5.90368	5.10051	5.74156	5.45092	5.98665	NA
Q6QD59	Vesicle transport protein SEC20 OS=Mus musculus OX=10090 GN=Bnip1 PE=1 SV=1	Bnip1	0.486117	0.00188004	0.0348785	+	0	26.062	25	5	6	0	5	228	26.2	8.75	20.4	9.64223	10.3587	9.71594	10.2587	9.80334	10.2348	9.89772	10.2313	9.8027	10.209	REACTOME_COPI_DEPENDENT_GOLGI_TO_ER_RETROGRADE_TRAFFIC|REACTOME_GOLGI_TO_ER_RETROGRADE_TRANSPORT|REACTOME_INTRA_GOLGI_AND_RETROGRADE_GOLGI_TO_ER_TRAFFIC|REACTOME_MEMBRANE_TRAFFICKING|REACTOME_VESICLE_MEDIATED_TRANSPORT
B1AVY7	Kinesin-like protein KIF16B OS=Mus musculus OX=10090 GN=Kif16b PE=1 SV=1	Kif16b	0.483025	0.00220501	0.0373564	+	0	15.671	3	3	3	0	2	1312	150	6.44	11.81	6.41144	6.9102	6.3593	7.01884	6.40639	6.98862	6.31111	6.57156	6.43019	6.84433	REACTOME_COPI_DEPENDENT_GOLGI_TO_ER_RETROGRADE_TRAFFIC|REACTOME_FACTORS_INVOLVED_IN_MEGAKARYOCYTE_DEVELOPMENT_AND_PLATELET_PRODUCTION|REACTOME_GOLGI_TO_ER_RETROGRADE_TRANSPORT|REACTOME_HEMOSTASIS|REACTOME_INTRA_GOLGI_AND_RETROGRADE_GOLGI_TO_ER_TRAFFIC|REACTOME_KINESINS|REACTOME_MEMBRANE_TRAFFICKING|REACTOME_VESICLE_MEDIATED_TRANSPORT
F6RJV6	Isoform of Q9JJK2, LanC-like protein 2 (Fragment) OS=Mus musculus OX=10090 GN=Lancl2 PE=1 SV=1	Lancl2	0.480644	0.00131968	0.0319589	+	0	15.869	14	5	7	0	5	441	49.7	7.14	19.81	9.84281	10.4907	9.93355	10.4158	10.3128	10.6009	10.2576	10.6921	9.91588	10.4664	NA
Q80Y55	BSD domain-containing protein 1 OS=Mus musculus OX=10090 GN=Bsdc1 PE=1 SV=1	Bsdc1	0.474668	4.04437e-06	0.00576057	+	0	23.043	9	3	4	3	3	427	46.9	4.4	16.06	8.99793	9.50142	9.03817	9.47791	9.13877	9.58596	9.08715	9.56558	8.82036	9.32484	NA
Q91YS7	Isoform of Q63932, Dual-specificity mitogen-activated protein kinase kinase 2 OS=Mus musculus OX=10090 GN=Map2k2 PE=1 SV=1	Map2k2	0.473542	0.00397273	0.0453555	+	0	59.66	31	13	20	0	10	400	44.3	7.05	69.44	11.4186	12.1545	11.5651	12.0934	11.7898	12.0592	11.7526	12.1139	11.5546	12.0274	REACTOME_CYTOKINE_SIGNALING_IN_IMMUNE_SYSTEM|REACTOME_DEVELOPMENTAL_BIOLOGY|REACTOME_DISEASE|REACTOME_DISEASES_OF_SIGNAL_TRANSDUCTION_BY_GROWTH_FACTOR_RECEPTORS_AND_SECOND_MESSENGERS|REACTOME_FLT3_SIGNALING|REACTOME_INFECTIOUS_DISEASE|REACTOME_INNATE_IMMUNE_SYSTEM|REACTOME_INTERLEUKIN_1_FAMILY_SIGNALING|REACTOME_INTERLEUKIN_1_SIGNALING|REACTOME_INTERLEUKIN_17_SIGNALING|REACTOME_L1CAM_INTERACTIONS…
A0A1W2P8E1	Isoform of Q8BU33, 2-hydroxyacyl-CoA lyase 2 OS=Mus musculus OX=10090 GN=Ilvbl PE=1 SV=1	Ilvbl	0.472442	0.000153584	0.0146375	+	0	14.661	8	4	4	0	4	596	64.1	8.6	10.29	8.63726	8.9863	8.48383	8.97857	8.56327	9.08834	8.57067	9.02671	8.60784	9.14516	NA
Q8CAB8	Cytosolic arginine sensor for mTORC1 subunit 2 OS=Mus musculus OX=10090 GN=Castor2 PE=1 SV=1	Castor2	0.469717	0.0027807	0.039639	+	0.001	7.215	6	1	2	1	1	329	36.1	5.45	9.94	7.06423	7.51701	7.14604	7.5005	7.38433	7.7125	7.14744	7.62909	7.08062	7.81215	REACTOME_AMINO_ACIDS_REGULATE_MTORC1|REACTOME_CELLULAR_RESPONSES_TO_EXTERNAL_STIMULI
Q91ZP3	Phosphatidate phosphatase LPIN1 OS=Mus musculus OX=10090 GN=Lpin1 PE=1 SV=1	Lpin1	0.468369	0.00233542	0.0377396	+	0	7.581	2	2	2	0	2	924	101.9	6.74	7.64	8.76324	9.43172	8.9092	9.37181	9.29284	9.53788	9.17124	9.62059	8.96582	9.48217	REACTOME_CELL_CYCLE|REACTOME_CELL_CYCLE_MITOTIC|REACTOME_DEPOLYMERISATION_OF_THE_NUCLEAR_LAMINA|REACTOME_GLYCEROPHOSPHOLIPID_BIOSYNTHESIS|REACTOME_M_PHASE|REACTOME_METABOLISM_OF_LIPIDS|REACTOME_MITOTIC_PROPHASE|REACTOME_NUCLEAR_ENVELOPE_BREAKDOWN|REACTOME_PHOSPHOLIPID_METABOLISM|REACTOME_SYNTHESIS_OF_PC|REACTOME_SYNTHESIS_OF_PE|REACTOME_TRIGLYCERIDE_BIOSYNTHESIS|REACTOME_TRIGLYCERIDE_METABOLISM
E9Q9T1	Isoform of Q3UZ39, Leucine-rich repeat flightless-interacting protein 1 OS=Mus musculus OX=10090 GN=Lrrfip1 PE=1 SV=2	Lrrfip1	0.467825	4.08859e-05	0.0115045	+	0	20.951	13	5	8	0	3	628	71.1	5.83	23.1	9.26093	9.75197	9.18057	9.72081	9.23433	9.62866	9.12477	9.58848	9.21041	9.66021	REACTOME_CYTOSOLIC_SENSORS_OF_PATHOGEN_ASSOCIATED_DNA_|REACTOME_DISEASE|REACTOME_DISEASES_OF_SIGNAL_TRANSDUCTION_BY_GROWTH_FACTOR_RECEPTORS_AND_SECOND_MESSENGERS|REACTOME_FGFR1_MUTANT_RECEPTOR_ACTIVATION|REACTOME_INNATE_IMMUNE_SYSTEM|REACTOME_LRR_FLII_INTERACTING_PROTEIN_1_LRRFIP1_ACTIVATES_TYPE_I_IFN_PRODUCTION|REACTOME_SIGNALING_BY_CYTOSOLIC_FGFR1_FUSION_MUTANTS|REACTOME_SIGNALING_BY_FGFR_IN_DI…
Q8BSF4	Phosphatidylserine decarboxylase proenzyme, mitochondrial OS=Mus musculus OX=10090 GN=Pisd PE=2 SV=1	Pisd	0.466415	0.00414079	0.0463968	+	0.001	7.755	5	2	2	0	2	406	45.9	9.57	6.75	9.06844	9.72118	9.10932	9.65168	9.2571	9.57172	9.36378	9.60829	9.07484	9.65269	REACTOME_GLYCEROPHOSPHOLIPID_BIOSYNTHESIS|REACTOME_METABOLISM_OF_LIPIDS|REACTOME_PHOSPHOLIPID_METABOLISM|REACTOME_SYNTHESIS_OF_PE
Q9CX34	Protein SGT1 homolog OS=Mus musculus OX=10090 GN=Sugt1 PE=1 SV=3	Sugt1	0.465751	0.00411573	0.0463968	+	0	53.855	32	10	17	10	10	336	38.1	5.45	52.15	11.0515	11.8026	11.2289	11.7445	11.3024	11.6911	11.4306	11.7417	11.2594	11.6216	REACTOME_DISEASE|REACTOME_INFECTIOUS_DISEASE|REACTOME_INFLAMMASOMES|REACTOME_INNATE_IMMUNE_SYSTEM|REACTOME_LEISHMANIA_INFECTION|REACTOME_NUCLEOTIDE_BINDING_DOMAIN_LEUCINE_RICH_REPEAT_CONTAINING_RECEPTOR_NLR_SIGNALING_PATHWAYS|REACTOME_PURINERGIC_SIGNALING_IN_LEISHMANIASIS_INFECTION|REACTOME_THE_NLRP3_INFLAMMASOME
Q99L04	Dehydrogenase/reductase SDR family member 1 OS=Mus musculus OX=10090 GN=Dhrs1 PE=1 SV=1	Dhrs1	0.462705	0.00226826	0.0373564	+	0	20.121	13	4	9	4	4	313	34	8.35	21.82	10.9343	11.3055	10.9543	11.2898	10.8201	11.4842	10.8537	11.434	10.9182	11.2805	NA
A0A5F8MQD2	Isoform of Q9CZP0, Ufm1-specific protease 1 OS=Mus musculus OX=10090 GN=Ufsp1 PE=1 SV=1	Ufsp1	0.461271	0.00107533	0.0292817	+	0.001	5.405	17	1	2	0	1	133	14.5	7.31	7.09	5.23992	5.59619	4.98724	5.4303	5.32675	5.97858	4.98433	5.4815	5.23419	5.5922	NA
O89023	Tripeptidyl-peptidase 1 OS=Mus musculus OX=10090 GN=Tpp1 PE=1 SV=2	Tpp1	0.460758	0.00472982	0.0493999	+	0	21.053	9	3	7	3	3	562	61.3	6.57	31.3	9.70482	10.1885	9.63172	10.1794	9.60898	10.0533	9.84839	10.0188	9.29418	9.95184	REACTOME_IRE1ALPHA_ACTIVATES_CHAPERONES|REACTOME_UNFOLDED_PROTEIN_RESPONSE_UPR_
Q9WUK2	Eukaryotic translation initiation factor 4H OS=Mus musculus OX=10090 GN=Eif4h PE=1 SV=3	Eif4h	0.454856	0.000229505	0.0173865	+	0	15.185	17	4	4	0	4	248	27.3	7.23	10.67	9.43447	9.95013	9.45442	10.0084	9.51102	9.9448	9.51059	9.86058	9.46035	9.88117	REACTOME_ACTIVATION_OF_THE_MRNA_UPON_BINDING_OF_THE_CAP_BINDING_COMPLEX_AND_EIFS_AND_SUBSEQUENT_BINDING_TO_43S|REACTOME_EUKARYOTIC_TRANSLATION_INITIATION|REACTOME_TRANSLATION
A0A1B0GT40	Isoform of Q9D6Y7, Peptide-methionine (S)-S-oxide reductase OS=Mus musculus OX=10090 GN=Msra PE=1 SV=1	Msra	0.45476	0.000860993	0.0269785	+	0	34.14	53	7	13	0	7	169	19.2	7.84	43.88	10.5977	11.2446	10.7361	11.1173	10.859	11.2933	10.8808	11.2414	10.6437	11.0943	REACTOME_PROTEIN_REPAIR
P70697	Uroporphyrinogen decarboxylase OS=Mus musculus OX=10090 GN=Urod PE=1 SV=2	Urod	0.451358	0.00186893	0.0348785	+	0	15.428	16	5	6	3	5	367	40.7	6.65	18.12	10.1449	10.5916	10.1106	10.419	9.95448	10.6144	9.98509	10.4785	10.0922	10.4405	REACTOME_HEME_BIOSYNTHESIS|REACTOME_METABOLISM_OF_PORPHYRINS
Q9DBC7	cAMP-dependent protein kinase type I-alpha regulatory subunit OS=Mus musculus OX=10090 GN=Prkar1a PE=1 SV=3	Prkar1a	0.449349	0.00163743	0.0343105	+	0	71.434	41	13	27	6	9	381	43.2	5.35	78.82	12.2849	12.923	12.4261	12.7456	12.33	12.775	12.4547	12.9678	12.3676	12.6987	REACTOME_ACTIVATION_OF_NMDA_RECEPTORS_AND_POSTSYNAPTIC_EVENTS|REACTOME_ADORA2B_MEDIATED_ANTI_INFLAMMATORY_CYTOKINES_PRODUCTION|REACTOME_ANTI_INFLAMMATORY_RESPONSE_FAVOURING_LEISHMANIA_PARASITE_INFECTION|REACTOME_AQUAPORIN_MEDIATED_TRANSPORT|REACTOME_CA_DEPENDENT_EVENTS|REACTOME_CREB1_PHOSPHORYLATION_THROUGH_THE_ACTIVATION_OF_ADENYLATE_CYCLASE|REACTOME_DAG_AND_IP3_SIGNALING|REACTOME_DARPP_32_EVENT…
Q91VX2	Ubiquitin-associated protein 2 OS=Mus musculus OX=10090 GN=Ubap2 PE=1 SV=1	Ubap2	0.44786	0.00103958	0.028996	+	0	48.637	14	9	15	0	9	1132	117.9	7.72	44.79	10.1738	10.8047	10.2702	10.7305	10.3363	10.7908	10.3522	10.6756	10.2381	10.6082	NA
Q8BP48	Methionine aminopeptidase 1 OS=Mus musculus OX=10090 GN=Metap1 PE=1 SV=1	Metap1	0.447708	0.0017764	0.0348438	+	0	34.404	23	6	8	4	6	386	43.2	7.17	31.06	10.5514	11.2039	10.6321	10.917	10.6776	11.132	10.6232	11.0049	10.5806	11.0456	REACTOME_G_ALPHA_I_SIGNALLING_EVENTS|REACTOME_SIGNALING_BY_GPCR|REACTOME_THE_PHOTOTRANSDUCTION_CASCADE|REACTOME_VISUAL_PHOTOTRANSDUCTION
Q8VCM4	Lipoyltransferase 1, mitochondrial OS=Mus musculus OX=10090 GN=Lipt1 PE=1 SV=1	Lipt1	0.446902	0.000532124	0.0227849	+	0	11.16	6	2	2	1	2	373	42.1	8.48	8.48	8.6788	9.14187	8.79121	9.0799	8.94522	9.38641	8.83721	9.322	8.57642	9.13319	REACTOME_GLYOXYLATE_METABOLISM_AND_GLYCINE_DEGRADATION|REACTOME_METABOLISM_OF_AMINO_ACIDS_AND_DERIVATIVES
O08663	Methionine aminopeptidase 2 OS=Mus musculus OX=10090 GN=Metap2 PE=1 SV=1	Metap2	0.446371	0.00370242	0.0439698	+	0	61.09	34	13	16	0	13	478	52.9	5.82	51.82	10.5421	11.2647	10.7014	11.103	10.8942	11.2166	10.8727	11.2004	10.7281	11.1857	REACTOME_G_ALPHA_I_SIGNALLING_EVENTS|REACTOME_SIGNALING_BY_GPCR|REACTOME_THE_PHOTOTRANSDUCTION_CASCADE|REACTOME_VISUAL_PHOTOTRANSDUCTION
Q9CZX9	ER membrane protein complex subunit 4 OS=Mus musculus OX=10090 GN=Emc4 PE=1 SV=1	Emc4	0.443065	0.00475691	0.0493999	+	0.001	4.694	7	1	1	1	1	183	20.1	8.62	3.49	7.48628	7.7039	7.40645	7.86626	7.55442	7.87339	7.32886	7.93483	7.30251	7.91546	NA
Q8BM72	Heat shock 70 kDa protein 13 OS=Mus musculus OX=10090 GN=Hspa13 PE=1 SV=1	Hspa13	0.439819	0.000544834	0.0231613	+	0	12.367	7	3	4	3	3	471	51.7	5.63	10.31	8.56023	8.9616	8.49494	9.06066	8.64366	8.97269	8.45643	8.84391	8.39125	8.90675	REACTOME_CELLULAR_RESPONSE_TO_HEAT_STRESS|REACTOME_CELLULAR_RESPONSES_TO_EXTERNAL_STIMULI|REACTOME_REGULATION_OF_HSF1_MEDIATED_HEAT_SHOCK_RESPONSE
Q99LH9	SH3 domain-binding protein 5-like OS=Mus musculus OX=10090 GN=Sh3bp5l PE=1 SV=1	Sh3bp5l	0.437733	0.00363713	0.0435056	+	0.017	2.034	2	1	1	1	1	392	43.3	6	3.16	7.74047	7.93073	7.6654	8.07102	7.82268	8.25638	7.57807	8.14713	7.55615	8.14617	NA
Q8VCA6	Transmembrane protein 161A OS=Mus musculus OX=10090 GN=Tmem161a PE=2 SV=1	Tmem161a	0.435639	0.000663951	0.0241706	+	0.001	4.985	4	2	2	0	2	480	54	8.38	4.8	7.91279	8.44726	8.07835	8.54577	8.3906	8.67486	8.19797	8.58289	7.96087	8.46799	NA
Q5EBG8	Uncharacterized protein C1orf50 homolog OS=Mus musculus OX=10090 PE=1 SV=1	NA	0.434238	0.000558768	0.023584	+	0	26.944	30	3	4	3	3	199	21.8	5.53	21.07	8.1773	8.59294	8.29871	8.72607	8.41602	8.72663	8.28656	8.72184	8.15102	8.73332	NA
Q8VE88-2	Isoform of Q8VE88, Isoform 2 of Protein FAM114A2 OS=Mus musculus OX=10090 GN=Fam114a2 PE=1 SV=2	Fam114a2	0.434021	6.10387e-05	0.0116169	+	0	50.207	29	9	12	1	9	490	53.3	4.89	38.71	9.87332	10.3469	9.95351	10.4545	10.0619	10.4557	10.0542	10.4213	9.96054	10.3952	REACTOME_DISEASE|REACTOME_DISEASES_OF_SIGNAL_TRANSDUCTION_BY_GROWTH_FACTOR_RECEPTORS_AND_SECOND_MESSENGERS|REACTOME_ONCOGENIC_MAPK_SIGNALING|REACTOME_SIGNALING_BY_BRAF_AND_RAF_FUSIONS
Q99JB2	Stomatin-like protein 2, mitochondrial OS=Mus musculus OX=10090 GN=Stoml2 PE=1 SV=1	Stoml2	0.425551	0.00289312	0.0398425	+	0	34.821	18	6	8	1	6	353	38.4	8.87	32.63	9.61563	9.7819	9.58759	10.0923	9.69821	10.1929	9.60239	10.1093	9.56368	10.0188	REACTOME_MITOCHONDRIAL_CALCIUM_ION_TRANSPORT|REACTOME_PROCESSING_OF_SMDT1|REACTOME_TRANSPORT_OF_SMALL_MOLECULES
Q8BGQ7	Alanine--tRNA ligase, cytoplasmic OS=Mus musculus OX=10090 GN=Aars1 PE=1 SV=1	Aars1	0.424459	0.00149429	0.0328508	+	0	83.527	18	16	27	16	16	968	106.8	5.67	86.21	12.075	12.7006	12.266	12.5748	12.1527	12.5634	12.2119	12.6417	12.1655	12.5128	NA
Q9D1P4	Cysteine and histidine-rich domain-containing protein 1 OS=Mus musculus OX=10090 GN=Chordc1 PE=1 SV=1	Chordc1	0.424051	0.00021248	0.0166017	+	0	67.759	49	10	20	2	10	331	37.3	7.9	79.23	11.4724	11.9693	11.584	12.0144	11.684	12.0111	11.6191	11.9932	11.46	11.9518	NA
Q6NSR8	Probable aminopeptidase NPEPL1 OS=Mus musculus OX=10090 GN=Npepl1 PE=1 SV=1	Npepl1	0.423996	0.00233296	0.0377396	+	0	28.911	16	5	6	1	5	524	55.9	6.84	23.65	9.73972	10.3631	9.87894	10.3771	10.0251	10.3838	10.0329	10.4013	9.9528	10.2242	NA
Q9QZE7	Translin-associated protein X OS=Mus musculus OX=10090 GN=Tsnax PE=1 SV=1	Tsnax	0.422175	2.57361e-05	0.00971849	+	0	32.946	23	4	7	2	4	290	32.9	6.55	28.36	9.71567	10.1355	9.64708	10.0546	9.7904	10.1995	9.72251	10.2171	9.80445	10.1843	REACTOME_GENE_SILENCING_BY_RNA|REACTOME_SMALL_INTERFERING_RNA_SIRNA_BIOGENESIS
Q3TAA8	Isoform of Q8K358, Phosphatidylinositol glycan anchor biosynthesis class U protein OS=Mus musculus OX=10090 GN=Pigu PE=1 SV=1	Pigu	0.421496	0.000906864	0.0275671	+	0	13.708	9	3	3	0	3	435	49.9	7.72	9.27	8.58956	9.07765	8.63534	8.98924	8.86556	9.13921	8.69475	9.14822	8.60105	9.13942	REACTOME_ATTACHMENT_OF_GPI_ANCHOR_TO_UPAR|REACTOME_POST_TRANSLATIONAL_MODIFICATION_SYNTHESIS_OF_GPI_ANCHORED_PROTEINS|REACTOME_POST_TRANSLATIONAL_PROTEIN_MODIFICATION
Q6PD19	Armadillo-like helical domain-containing protein 3 OS=Mus musculus OX=10090 GN=Armh3 PE=1 SV=2	Armh3	0.420096	0.00147126	0.0326829	+	0.005	2.792	1	1	1	0	1	689	78.6	6.6	2.54	7.8142	8.1514	7.73071	7.98967	7.71339	8.25899	7.5711	8.08714	7.65212	8.09479	NA
D3YZP9	Coiled-coil domain-containing protein 6 OS=Mus musculus OX=10090 GN=Ccdc6 PE=1 SV=1	Ccdc6	0.41893	0.00200487	0.035383	+	0	19.6	9	4	11	3	4	469	52.9	7.34	31.43	9.62803	10.2369	9.66737	10.1599	9.82775	10.1941	9.78709	10.1307	9.69745	9.98081	NA
Q6P1H6	Ankyrin repeat and LEM domain-containing protein 2 OS=Mus musculus OX=10090 GN=Ankle2 PE=1 SV=2	Ankle2	0.418865	0.00016811	0.0157676	+	0	15.8	5	3	3	0	3	964	106.1	7.37	12.68	8.5385	8.93606	8.51536	8.835	8.61058	9.0255	8.56445	9.06613	8.50078	8.96129	REACTOME_CELL_CYCLE|REACTOME_CELL_CYCLE_MITOTIC|REACTOME_INITIATION_OF_NUCLEAR_ENVELOPE_NE_REFORMATION|REACTOME_M_PHASE|REACTOME_MITOTIC_METAPHASE_AND_ANAPHASE|REACTOME_NUCLEAR_ENVELOPE_NE_REASSEMBLY
A0A5F8MPQ4	Isoform of Q3UTJ2, Sorbin and SH3 domain-containing protein 2 (Fragment) OS=Mus musculus OX=10090 GN=Sorbs2 PE=1 SV=1	Sorbs2	0.418813	0.00391415	0.0451732	+	0	30.47	22	6	8	2	2	390	43.1	4.75	31.58	8.06739	8.5996	8.24423	8.65785	8.3982	8.56004	8.29727	8.72765	8.21658	8.7726	NA
Q9CZN7	Serine hydroxymethyltransferase, mitochondrial OS=Mus musculus OX=10090 GN=Shmt2 PE=1 SV=1	Shmt2	0.418645	0.00152793	0.0332544	+	0	48.236	27	12	15	0	11	504	55.7	8.47	48.23	11.0921	11.6493	11.2475	11.4858	11.1501	11.6349	11.288	11.7309	11.1826	11.5526	REACTOME_METABOLISM_OF_AMINO_ACIDS_AND_DERIVATIVES|REACTOME_METABOLISM_OF_FOLATE_AND_PTERINES|REACTOME_METABOLISM_OF_VITAMINS_AND_COFACTORS|REACTOME_METABOLISM_OF_WATER_SOLUBLE_VITAMINS_AND_COFACTORS
D3YVS1	Isoform of Q921U8, Smoothelin OS=Mus musculus OX=10090 GN=Smtn PE=1 SV=1	Smtn	0.418093	7.67996e-05	0.0120624	+	0	26.848	17	6	8	2	2	436	47.5	5.52	22.18	9.16778	9.67804	9.25896	9.65406	9.47986	9.83994	9.51246	9.91478	9.48327	9.90597	NA
Q9WTX6	Cullin-1 OS=Mus musculus OX=10090 GN=Cul1 PE=1 SV=1	Cul1	0.415297	0.00461174	0.0487491	+	0	88.381	25	18	27	3	18	776	89.6	8	97.02	12.1383	12.8381	12.3314	12.6983	12.4179	12.7382	12.5504	12.8562	12.3474	12.7311	REACTOME_ADAPTIVE_IMMUNE_SYSTEM|REACTOME_ANTIGEN_PROCESSING_UBIQUITINATION_PROTEASOME_DEGRADATION|REACTOME_APC_C_MEDIATED_DEGRADATION_OF_CELL_CYCLE_PROTEINS|REACTOME_C_TYPE_LECTIN_RECEPTORS_CLRS_|REACTOME_CELL_CYCLE|REACTOME_CELL_CYCLE_MITOTIC|REACTOME_CIRCADIAN_CLOCK|REACTOME_CLASS_I_MHC_MEDIATED_ANTIGEN_PROCESSING_PRESENTATION|REACTOME_CLEC7A_DECTIN_1_SIGNALING|REACTOME_CYCLIN_A_CDK2_ASSOCIATED…
Q8BH43	Wiskott-Aldrich syndrome protein family member 2 OS=Mus musculus OX=10090 GN=Wasf2 PE=1 SV=1	Wasf2	0.41498	0.00439833	0.0475132	+	0.001	5.331	3	1	2	1	1	497	54	5.53	6.11	8.3052	8.51834	8.19493	8.56972	8.21495	8.58954	8.23849	8.69837	8.11291	8.76543	REACTOME_DISEASE|REACTOME_FCGAMMA_RECEPTOR_FCGR_DEPENDENT_PHAGOCYTOSIS|REACTOME_INFECTIOUS_DISEASE|REACTOME_INNATE_IMMUNE_SYSTEM|REACTOME_LEISHMANIA_INFECTION|REACTOME_PARASITE_INFECTION|REACTOME_RHO_GTPASE_EFFECTORS|REACTOME_RHO_GTPASES_ACTIVATE_WASPS_AND_WAVES|REACTOME_SIGNALING_BY_RECEPTOR_TYROSINE_KINASES|REACTOME_SIGNALING_BY_RHO_GTPASES|REACTOME_SIGNALING_BY_VEGF
Q8BGF3	Dynein axonemal assembly factor 10 OS=Mus musculus OX=10090 GN=Dnaaf10 PE=1 SV=1	Dnaaf10	0.413856	0.00352581	0.0430454	+	0.03	1.437	2	1	1	1	1	357	39.8	8.15	2.21	5.6399	5.97799	5.61131	6.05379	5.79864	6.25297	5.83371	6.04833	5.59307	6.21283	NA
Q91ZE0	Trimethyllysine dioxygenase, mitochondrial OS=Mus musculus OX=10090 GN=Tmlhe PE=1 SV=2	Tmlhe	0.413201	0.000260599	0.0180699	+	0	11.835	8	4	4	4	4	421	49.6	8.25	12.48	9.74789	10.1073	9.74528	10.0898	9.75595	10.2787	9.75207	10.2124	9.62844	10.0075	REACTOME_METABOLISM_OF_AMINO_ACIDS_AND_DERIVATIVES
Q8K440	ABC-type organic anion transporter ABCA8B OS=Mus musculus OX=10090 GN=Abca8b PE=1 SV=2	Abca8b	0.41265	0.00153706	0.0332544	+	0	33.764	7	7	7	0	7	1620	182.9	7.18	31.27	9.3764	9.98945	9.54818	9.94101	9.75111	10.0422	9.76456	10.1318	9.65064	10.0496	REACTOME_ABC_FAMILY_PROTEINS_MEDIATED_TRANSPORT|REACTOME_ABC_TRANSPORTERS_IN_LIPID_HOMEOSTASIS|REACTOME_FOXO_MEDIATED_TRANSCRIPTION|REACTOME_FOXO_MEDIATED_TRANSCRIPTION_OF_OXIDATIVE_STRESS_METABOLIC_AND_NEURONAL_GENES|REACTOME_RNA_POLYMERASE_II_TRANSCRIPTION|REACTOME_TRANSPORT_OF_SMALL_MOLECULES
Q62009-2	Isoform of Q62009, Isoform 2 of Periostin OS=Mus musculus OX=10090 GN=Postn PE=1 SV=2	Postn	0.411435	0.00474545	0.0493999	+	0	140.537	37	23	42	0	1	811	90.2	7.25	173.4	7.52235	7.66871	7.45447	7.89365	7.73294	8.27364	7.23217	7.62213	7.06348	7.60447	NA
Q61475	Complement decay-accelerating factor, GPI-anchored OS=Mus musculus OX=10090 GN=Cd55 PE=1 SV=2	Cd55	0.411056	0.000993005	0.028976	+	0.001	9.844	8	4	7	2	4	390	42.6	8.4	18.53	10.2352	10.7466	10.1831	10.7003	10.3175	10.6419	10.2894	10.5721	10.197	10.6164	REACTOME_ASPARAGINE_N_LINKED_GLYCOSYLATION|REACTOME_CLASS_B_2_SECRETIN_FAMILY_RECEPTORS_|REACTOME_COMPLEMENT_CASCADE|REACTOME_COPI_MEDIATED_ANTEROGRADE_TRANSPORT|REACTOME_ER_TO_GOLGI_ANTEROGRADE_TRANSPORT|REACTOME_GPCR_LIGAND_BINDING|REACTOME_INNATE_IMMUNE_SYSTEM|REACTOME_MEMBRANE_TRAFFICKING|REACTOME_NEUTROPHIL_DEGRANULATION|REACTOME_POST_TRANSLATIONAL_PROTEIN_MODIFICATION|REACTOME_SIGNALING_BY_…
Q8R127	Saccharopine dehydrogenase-like oxidoreductase OS=Mus musculus OX=10090 GN=Sccpdh PE=1 SV=1	Sccpdh	0.407662	0.000250228	0.0176993	+	0	17.635	18	6	7	1	6	429	47.1	8.6	19.99	10.3397	10.8708	10.3906	10.7586	10.4649	10.8569	10.4579	10.7959	10.3869	10.7962	REACTOME_HEMOSTASIS|REACTOME_PLATELET_ACTIVATION_SIGNALING_AND_AGGREGATION|REACTOME_RESPONSE_TO_ELEVATED_PLATELET_CYTOSOLIC_CA2_
Q91V01	Lysophospholipid acyltransferase 5 OS=Mus musculus OX=10090 GN=Lpcat3 PE=1 SV=1	Lpcat3	0.407391	0.00129056	0.0319589	+	0.004	3.59	2	1	1	1	1	487	56.1	8.56	3.09	7.53109	7.92644	7.36287	7.90222	7.83872	8.17146	7.62255	7.89108	7.48044	7.98143	REACTOME_ACYL_CHAIN_REMODELLING_OF_PC|REACTOME_ACYL_CHAIN_REMODELLING_OF_PE|REACTOME_ACYL_CHAIN_REMODELLING_OF_PS|REACTOME_GLYCEROPHOSPHOLIPID_BIOSYNTHESIS|REACTOME_METABOLISM_OF_LIPIDS|REACTOME_PHOSPHOLIPID_METABOLISM
P49138	MAP kinase-activated protein kinase 2 OS=Mus musculus OX=10090 GN=Mapkapk2 PE=1 SV=2	Mapkapk2	0.405392	0.00293428	0.0398425	+	0	43.575	26	10	17	6	8	386	44	8.57	57.82	11.1588	11.802	11.2902	11.6707	11.3306	11.7166	11.4374	11.779	11.3181	11.5939	REACTOME_ACTIVATED_TAK1_MEDIATES_P38_MAPK_ACTIVATION|REACTOME_ARACHIDONIC_ACID_METABOLISM|REACTOME_BUTYRATE_RESPONSE_FACTOR_1_BRF1_BINDS_AND_DESTABILIZES_MRNA|REACTOME_CELLULAR_RESPONSE_TO_HEAT_STRESS|REACTOME_CELLULAR_RESPONSES_TO_EXTERNAL_STIMULI|REACTOME_CELLULAR_SENESCENCE|REACTOME_CREB_PHOSPHORYLATION|REACTOME_CYTOKINE_SIGNALING_IN_IMMUNE_SYSTEM|REACTOME_FATTY_ACID_METABOLISM|REACTOME_INNATE…
Q3U4G3	Xyloside xylosyltransferase 1 OS=Mus musculus OX=10090 GN=Xxylt1 PE=1 SV=2	Xxylt1	0.404136	0.00034449	0.0194562	+	0	19.839	11	3	3	3	3	392	43.8	7.78	13.18	8.41421	8.80538	8.4678	8.9713	8.61028	8.9241	8.45067	8.79683	8.55756	9.0236	NA
A0A0A6YVR9	Isoform of P09925, SURF1-like protein (Fragment) OS=Mus musculus OX=10090 GN=Surf1 PE=1 SV=1	Surf1	0.403796	0.000585567	0.0236994	+	0	25.822	28	5	8	0	5	240	27.1	8.69	26.12	10.2182	10.692	10.1942	10.5459	10.2006	10.701	10.2387	10.6553	10.1994	10.4759	REACTOME_RESPIRATORY_ELECTRON_TRANSPORT|REACTOME_RESPIRATORY_ELECTRON_TRANSPORT_ATP_SYNTHESIS_BY_CHEMIOSMOTIC_COUPLING_AND_HEAT_PRODUCTION_BY_UNCOUPLING_PROTEINS_|REACTOME_RNA_POLYMERASE_II_TRANSCRIPTION|REACTOME_THE_CITRIC_ACID_TCA_CYCLE_AND_RESPIRATORY_ELECTRON_TRANSPORT|REACTOME_TP53_REGULATES_METABOLIC_GENES|REACTOME_TRANSCRIPTIONAL_REGULATION_BY_TP53
E9PYJ6	Isoform of A2AKG8, Focadhesin OS=Mus musculus OX=10090 GN=Focad PE=1 SV=1	Focad	0.401946	0.00175475	0.0347947	+	0	18.54	3	5	5	0	5	1712	189.4	6.9	16.76	9.58891	10.2045	9.74992	10.0899	9.81265	10.1947	9.83189	10.1715	9.72347	10.0559	NA
Q8VBT9	Tether containing UBX domain for GLUT4 OS=Mus musculus OX=10090 GN=Aspscr1 PE=1 SV=1	Aspscr1	0.400918	0.00060402	0.0237047	+	0	12.941	7	2	4	0	2	550	59.8	6.96	12.96	8.5245	8.85722	8.51536	8.87984	8.41159	8.80728	8.37672	8.7293	8.29768	8.85679	REACTOME_MEMBRANE_TRAFFICKING|REACTOME_TRANSLOCATION_OF_SLC2A4_GLUT4_TO_THE_PLASMA_MEMBRANE|REACTOME_VESICLE_MEDIATED_TRANSPORT
Q8C013	Trophoblast glycoprotein-like OS=Mus musculus OX=10090 GN=Tpbgl PE=1 SV=2	Tpbgl	0.400614	0.00250437	0.0384	+	0	10.986	8	3	3	3	3	384	41.1	7.39	9.9	8.49087	8.94932	8.49573	8.97035	8.68163	8.88891	8.77447	9.10035	8.55219	9.08902	NA
Q5SS55	Isoform of Q69ZW3, EH domain-binding protein 1 (Fragment) OS=Mus musculus OX=10090 GN=Ehbp1 PE=1 SV=1	Ehbp1	0.398542	0.000609768	0.0237047	+	0	12.303	7	2	2	1	1	308	35.3	5.25	7.66	7.11143	7.53154	7.03277	7.39646	7.13049	7.40356	6.94456	7.35732	6.9148	7.43788	NA
Q61703	Inter-alpha-trypsin inhibitor heavy chain H2 OS=Mus musculus OX=10090 GN=Itih2 PE=1 SV=1	Itih2	0.395886	0.00308607	0.0406138	+	0	28.323	7	5	9	0	5	946	105.9	7.27	29.92	11.0674	11.6777	11.1292	11.4497	11.0493	11.4318	11.0977	11.5233	11.1252	11.3657	REACTOME_HEMOSTASIS|REACTOME_PLATELET_ACTIVATION_SIGNALING_AND_AGGREGATION|REACTOME_POST_TRANSLATIONAL_PROTEIN_MODIFICATION|REACTOME_REGULATION_OF_INSULIN_LIKE_GROWTH_FACTOR_IGF_TRANSPORT_AND_UPTAKE_BY_INSULIN_LIKE_GROWTH_FACTOR_BINDING_PROTEINS_IGFBPS_|REACTOME_RESPONSE_TO_ELEVATED_PLATELET_CYTOSOLIC_CA2_
Q6PCP5	Mitochondrial fission factor OS=Mus musculus OX=10090 GN=Mff PE=1 SV=1	Mff	0.394761	0.0035644	0.0433376	+	0	26.581	27	5	6	0	3	291	32.9	6.83	22.97	9.57351	10.1099	9.57663	10.1432	9.76999	10.0741	9.76436	10.0497	9.66905	9.95041	NA
Q8K3K8	Optineurin OS=Mus musculus OX=10090 GN=Optn PE=1 SV=1	Optn	0.394022	0.00321262	0.0414983	+	0	12.654	5	3	4	3	3	584	67	5.26	14.93	9.40012	9.76959	9.42798	9.84928	9.66766	9.86148	9.46511	9.86598	9.43028	10.0149	REACTOME_CELL_CYCLE|REACTOME_CELL_CYCLE_MITOTIC|REACTOME_MEMBRANE_TRAFFICKING|REACTOME_MITOTIC_G2_G2_M_PHASES|REACTOME_RAB_REGULATION_OF_TRAFFICKING|REACTOME_REGULATION_OF_PLK1_ACTIVITY_AT_G2_M_TRANSITION|REACTOME_TBC_RABGAPS|REACTOME_VESICLE_MEDIATED_TRANSPORT
Z4YJT3	Isoform of Q6ZQ58, La-related protein 1 OS=Mus musculus OX=10090 GN=Larp1 PE=1 SV=1	Larp1	0.392555	0.0026155	0.0388989	+	0	50.478	13	10	15	0	10	1072	121.1	8.79	46.16	10.7924	11.3601	10.9081	11.2414	10.8277	11.2978	10.8539	11.2214	10.8566	11.0809	NA
Q8C0D5	Elongation factor-like GTPase 1 OS=Mus musculus OX=10090 GN=Efl1 PE=1 SV=1	Efl1	0.391985	0.00110416	0.0297922	+	0	31.076	10	8	9	6	8	1127	125.7	6.16	24.51	10.1477	10.7052	10.2648	10.623	10.3246	10.7422	10.342	10.6879	10.2731	10.5539	NA
D3YWB8	Isoform of Q9Z1M4, Non-specific serine/threonine protein kinase OS=Mus musculus OX=10090 GN=Rps6kb2 PE=1 SV=1	Rps6kb2	0.390432	0.00443095	0.0477782	+	0	23.196	18	5	6	0	5	392	43.5	5.88	19.83	9.26624	9.83093	9.38728	9.91284	9.53692	9.84322	9.59511	9.80232	9.42664	9.77505	REACTOME_AKT_PHOSPHORYLATES_TARGETS_IN_THE_NUCLEUS|REACTOME_CONSTITUTIVE_SIGNALING_BY_AKT1_E17K_IN_CANCER|REACTOME_DISEASE|REACTOME_DISEASES_OF_SIGNAL_TRANSDUCTION_BY_GROWTH_FACTOR_RECEPTORS_AND_SECOND_MESSENGERS|REACTOME_INTRACELLULAR_SIGNALING_BY_SECOND_MESSENGERS|REACTOME_MTOR_SIGNALLING|REACTOME_MTORC1_MEDIATED_SIGNALLING|REACTOME_PI3K_AKT_SIGNALING_IN_CANCER
Q61704	Inter-alpha-trypsin inhibitor heavy chain H3 OS=Mus musculus OX=10090 GN=Itih3 PE=1 SV=3	Itih3	0.390374	0.000818199	0.0262758	+	0	62.878	12	7	16	1	7	889	99.3	6.05	55.34	10.4501	10.9592	10.6967	11.1751	10.917	11.232	10.826	11.1297	10.5766	10.9224	REACTOME_HEMOSTASIS|REACTOME_PLATELET_ACTIVATION_SIGNALING_AND_AGGREGATION|REACTOME_POST_TRANSLATIONAL_PROTEIN_MODIFICATION|REACTOME_REGULATION_OF_INSULIN_LIKE_GROWTH_FACTOR_IGF_TRANSPORT_AND_UPTAKE_BY_INSULIN_LIKE_GROWTH_FACTOR_BINDING_PROTEINS_IGFBPS_|REACTOME_RESPONSE_TO_ELEVATED_PLATELET_CYTOSOLIC_CA2_
Q99K28	ADP-ribosylation factor GTPase-activating protein 2 OS=Mus musculus OX=10090 GN=Arfgap2 PE=1 SV=1	Arfgap2	0.388485	0.000334496	0.0194562	+	0	41.692	17	6	9	0	6	520	56.6	8.18	37.53	10.278	10.7356	10.3581	10.8209	10.6125	10.898	10.5385	10.8804	10.4645	10.8592	REACTOME_ASPARAGINE_N_LINKED_GLYCOSYLATION|REACTOME_COPI_DEPENDENT_GOLGI_TO_ER_RETROGRADE_TRAFFIC|REACTOME_COPI_MEDIATED_ANTEROGRADE_TRANSPORT|REACTOME_ER_TO_GOLGI_ANTEROGRADE_TRANSPORT|REACTOME_GOLGI_TO_ER_RETROGRADE_TRANSPORT|REACTOME_INTRA_GOLGI_AND_RETROGRADE_GOLGI_TO_ER_TRAFFIC|REACTOME_MEMBRANE_TRAFFICKING|REACTOME_POST_TRANSLATIONAL_PROTEIN_MODIFICATION|REACTOME_TRANSPORT_TO_THE_GOLGI_AND_…
Q8CI75	DIS3-like exonuclease 2 OS=Mus musculus OX=10090 GN=Dis3l2 PE=1 SV=1	Dis3l2	0.387955	0.000246156	0.0176993	+	0	21.745	11	6	8	0	6	870	97.7	5.9	24.88	9.38952	9.8292	9.30159	9.7359	9.4993	9.77598	9.41093	9.84017	9.49286	9.85273	NA
O55013	Trafficking protein particle complex subunit 3 OS=Mus musculus OX=10090 GN=Trappc3 PE=1 SV=1	Trappc3	0.387867	0.000235205	0.0175927	+	0	16.766	22	4	7	4	4	180	20.3	4.96	18.71	9.5795	9.9861	9.57756	9.85413	9.53601	10.0035	9.55925	9.95951	9.54514	9.93351	REACTOME_ASPARAGINE_N_LINKED_GLYCOSYLATION|REACTOME_COPII_MEDIATED_VESICLE_TRANSPORT|REACTOME_ER_TO_GOLGI_ANTEROGRADE_TRANSPORT|REACTOME_MEMBRANE_TRAFFICKING|REACTOME_POST_TRANSLATIONAL_PROTEIN_MODIFICATION|REACTOME_RAB_GEFS_EXCHANGE_GTP_FOR_GDP_ON_RABS|REACTOME_RAB_REGULATION_OF_TRAFFICKING|REACTOME_TRANSPORT_TO_THE_GOLGI_AND_SUBSEQUENT_MODIFICATION|REACTOME_VESICLE_MEDIATED_TRANSPORT
Q3TC93	HCLS1-binding protein 3 OS=Mus musculus OX=10090 GN=Hs1bp3 PE=1 SV=2	Hs1bp3	0.386816	0.000126726	0.0146375	+	0	27.591	15	4	7	2	4	395	43.7	4.98	27.78	9.23959	9.65601	9.16078	9.63488	9.23528	9.5965	9.22825	9.55139	9.27766	9.63687	NA
Q5NCE8	Magnesium transporter MRS2 homolog, mitochondrial OS=Mus musculus OX=10090 GN=Mrs2 PE=2 SV=2	Mrs2	0.386043	0.003946	0.0453555	+	0.001	7.071	4	2	2	2	2	434	49.3	7.53	6.41	8.03088	8.44175	8.21908	8.7095	8.54972	8.73658	8.32998	8.62875	8.05817	8.60146	REACTOME_MISCELLANEOUS_TRANSPORT_AND_BINDING_EVENTS|REACTOME_TRANSPORT_OF_SMALL_MOLECULES
E9Q3I4	Isoform of Q9Z0R4, Intersectin-1 OS=Mus musculus OX=10090 GN=Itsn1 PE=1 SV=1	Itsn1	0.384689	0.00154201	0.0332544	+	0	50.958	10	11	16	0	11	1176	133.1	7.88	48.76	11.044	11.6097	11.0893	11.509	11.1754	11.4895	11.2101	11.505	11.0642	11.3934	REACTOME_CARGO_RECOGNITION_FOR_CLATHRIN_MEDIATED_ENDOCYTOSIS|REACTOME_CELL_DEATH_SIGNALLING_VIA_NRAGE_NRIF_AND_NADE|REACTOME_CLATHRIN_MEDIATED_ENDOCYTOSIS|REACTOME_DEATH_RECEPTOR_SIGNALLING|REACTOME_DEVELOPMENTAL_BIOLOGY|REACTOME_EPH_EPHRIN_SIGNALING|REACTOME_EPHB_MEDIATED_FORWARD_SIGNALING|REACTOME_G_ALPHA_12_13_SIGNALLING_EVENTS|REACTOME_MEMBRANE_TRAFFICKING|REACTOME_NERVOUS_SYSTEM_DEVELOPMENT|…
Q8R105	Vacuolar protein sorting-associated protein 37C OS=Mus musculus OX=10090 GN=Vps37c PE=1 SV=1	Vps37c	0.382096	0.00155545	0.0333013	+	0	11.873	10	2	3	0	2	352	38.4	5.31	5.72	7.28804	7.7383	7.42652	7.8534	7.79906	8.03427	7.58759	7.88452	7.44549	7.9467	REACTOME_ASSEMBLY_OF_THE_HIV_VIRION|REACTOME_AUTOPHAGY|REACTOME_BUDDING_AND_MATURATION_OF_HIV_VIRION|REACTOME_DISEASE|REACTOME_ENDOSOMAL_SORTING_COMPLEX_REQUIRED_FOR_TRANSPORT_ESCRT_|REACTOME_HCMV_INFECTION|REACTOME_HCMV_LATE_EVENTS|REACTOME_HIV_INFECTION|REACTOME_HIV_LIFE_CYCLE|REACTOME_INFECTIOUS_DISEASE|REACTOME_LATE_ENDOSOMAL_MICROAUTOPHAGY|REACTOME_MEMBRANE_TRAFFICKING|REACTOME_VESICLE_MEDIA…
Q61500	Integral membrane protein 2A OS=Mus musculus OX=10090 GN=Itm2a PE=2 SV=2	Itm2a	0.380982	0.00091759	0.0275671	+	0.001	6.013	11	3	4	3	3	263	29.7	5.72	5.54	9.37456	9.66844	9.21623	9.52246	9.1857	9.72209	9.08371	9.47454	9.22562	9.6032	NA
Q3UEL5	Isoform of Q8VC12, Imidazolonepropionate hydrolase OS=Mus musculus OX=10090 GN=Uroc1 PE=1 SV=1	Uroc1	0.379323	0.000360786	0.0194562	+	0.03	1.462	1	1	1	0	1	710	78.4	7.27	2.07	7.8837	8.29301	7.75206	8.21438	7.71451	8.02817	7.69331	7.97938	7.83646	8.26173	REACTOME_HISTIDINE_CATABOLISM|REACTOME_METABOLISM_OF_AMINO_ACIDS_AND_DERIVATIVES
O35379	Multidrug resistance-associated protein 1 OS=Mus musculus OX=10090 GN=Abcc1 PE=1 SV=1	Abcc1	0.376279	0.00182154	0.0348785	+	0	16.408	2	3	3	3	3	1528	171.1	7.36	12.28	8.89336	9.3198	8.90027	9.19246	9.09105	9.3383	8.97625	9.35384	8.76881	9.30674	REACTOME_ABC_FAMILY_PROTEINS_MEDIATED_TRANSPORT|REACTOME_ABC_TRANSPORTER_DISORDERS|REACTOME_ARACHIDONIC_ACID_METABOLISM|REACTOME_BILE_ACID_AND_BILE_SALT_METABOLISM|REACTOME_CARDIAC_CONDUCTION|REACTOME_COBALAMIN_CBL_VITAMIN_B12_TRANSPORT_AND_METABOLISM|REACTOME_DISEASE|REACTOME_DISORDERS_OF_TRANSMEMBRANE_TRANSPORTERS|REACTOME_FATTY_ACID_METABOLISM|REACTOME_GLYCOSAMINOGLYCAN_METABOLISM|REACTOME_HEM…
Q8BVF2	Phosducin-like protein 3 OS=Mus musculus OX=10090 GN=Pdcl3 PE=1 SV=1	Pdcl3	0.375954	0.00283753	0.039639	+	0	17.429	17	4	5	3	4	240	27.6	4.72	15.34	9.67936	10.0871	9.62956	9.865	9.46498	9.97474	9.50189	9.98209	9.59601	9.84265	NA
Q61166	Microtubule-associated protein RP/EB family member 1 OS=Mus musculus OX=10090 GN=Mapre1 PE=1 SV=3	Mapre1	0.375809	0.0029686	0.0398425	+	0	39.685	41	9	13	7	7	268	30	5.22	41.42	11.4226	11.8677	11.409	11.778	11.2736	11.7931	11.3973	11.7728	11.3898	11.5597	REACTOME_ANCHORING_OF_THE_BASAL_BODY_TO_THE_PLASMA_MEMBRANE|REACTOME_AURKA_ACTIVATION_BY_TPX2|REACTOME_CELL_CYCLE|REACTOME_CELL_CYCLE_CHECKPOINTS|REACTOME_CELL_CYCLE_MITOTIC|REACTOME_CILIUM_ASSEMBLY|REACTOME_M_PHASE|REACTOME_MITOTIC_G2_G2_M_PHASES|REACTOME_MITOTIC_METAPHASE_AND_ANAPHASE|REACTOME_MITOTIC_PROMETAPHASE|REACTOME_MITOTIC_SPINDLE_CHECKPOINT|REACTOME_ORGANELLE_BIOGENESIS_AND_MAINTENANCE…
Q9Z321	DNA topoisomerase 3-beta-1 OS=Mus musculus OX=10090 GN=Top3b PE=1 SV=1	Top3b	0.373921	0.000210867	0.0166017	+	0	15.311	5	3	4	0	3	862	96.9	7.93	18.14	9.36561	9.84178	9.4105	9.70747	9.47731	9.82976	9.54832	9.92609	9.4035	9.76974	NA
Q8N7N5	DDB1- and CUL4-associated factor 8 OS=Mus musculus OX=10090 GN=Dcaf8 PE=1 SV=1	Dcaf8	0.372917	0.00320614	0.0414983	+	0	16.836	8	5	6	0	5	591	66	5.87	15.44	9.54	10.0913	9.60508	10.0262	9.84182	10.1662	9.88886	10.0798	9.73455	10.1114	REACTOME_NEDDYLATION|REACTOME_POST_TRANSLATIONAL_PROTEIN_MODIFICATION
Q9R000	Integrin beta-1-binding protein 2 OS=Mus musculus OX=10090 GN=Itgb1bp2 PE=1 SV=1	Itgb1bp2	0.369739	0.000193031	0.0165307	+	0.001	7.619	6	2	2	2	2	350	38.7	4.88	6.48	9.2234	9.55362	9.20734	9.50277	9.16692	9.5863	9.10824	9.46424	9.10547	9.55313	NA
Q9D6S7	Ribosome-recycling factor, mitochondrial OS=Mus musculus OX=10090 GN=Mrrf PE=1 SV=1	Mrrf	0.369231	0.00101407	0.0289937	+	0	25.793	25	4	7	4	4	262	29	9.85	25.47	9.4675	9.94141	9.66614	9.97885	9.68081	10.1214	9.85249	10.0889	9.56244	9.94493	REACTOME_MITOCHONDRIAL_TRANSLATION|REACTOME_TRANSLATION
A2AGT5	Cytoskeleton-associated protein 5 OS=Mus musculus OX=10090 GN=Ckap5 PE=1 SV=1	Ckap5	0.369209	0.000971402	0.0287001	+	0	60.603	8	14	18	0	14	2032	225.5	7.96	60.64	11.5258	12.0006	11.6352	11.8544	11.5019	11.859	11.615	12.0326	11.501	11.8784	REACTOME_ANCHORING_OF_THE_BASAL_BODY_TO_THE_PLASMA_MEMBRANE|REACTOME_AURKA_ACTIVATION_BY_TPX2|REACTOME_CELL_CYCLE|REACTOME_CELL_CYCLE_CHECKPOINTS|REACTOME_CELL_CYCLE_MITOTIC|REACTOME_CILIUM_ASSEMBLY|REACTOME_M_PHASE|REACTOME_MITOTIC_G2_G2_M_PHASES|REACTOME_MITOTIC_METAPHASE_AND_ANAPHASE|REACTOME_MITOTIC_PROMETAPHASE|REACTOME_MITOTIC_SPINDLE_CHECKPOINT|REACTOME_ORGANELLE_BIOGENESIS_AND_MAINTENANCE…
Q8BSZ2	AP-3 complex subunit sigma-2 OS=Mus musculus OX=10090 GN=Ap3s2 PE=1 SV=1	Ap3s2	0.365409	0.00257666	0.0388989	+	0.009	2.619	4	1	1	1	1	193	22	5.22	2.65	7.80041	8.17642	7.83817	7.99091	7.8159	8.26504	7.74074	8.15933	7.6885	8.11906	NA
Q9D8C3	Putative bifunctional UDP-N-acetylglucosamine transferase and deubiquitinase ALG13 OS=Mus musculus OX=10090 GN=Alg13 PE=1 SV=2	Alg13	0.364595	0.00361227	0.0433839	+	0.001	6.34	1	1	1	0	1	1166	128.6	6.48	5.24	8.77075	9.07278	8.73007	9.06185	8.88176	9.08276	8.75308	9.19369	8.58818	9.13573	REACTOME_ASPARAGINE_N_LINKED_GLYCOSYLATION|REACTOME_BIOSYNTHESIS_OF_THE_N_GLYCAN_PRECURSOR_DOLICHOL_LIPID_LINKED_OLIGOSACCHARIDE_LLO_AND_TRANSFER_TO_A_NASCENT_PROTEIN|REACTOME_DISEASE|REACTOME_DISEASES_ASSOCIATED_WITH_N_GLYCOSYLATION_OF_PROTEINS|REACTOME_DISEASES_OF_GLYCOSYLATION|REACTOME_DISEASES_OF_METABOLISM|REACTOME_POST_TRANSLATIONAL_PROTEIN_MODIFICATION
Q8BGB7	Enolase-phosphatase E1 OS=Mus musculus OX=10090 GN=Enoph1 PE=1 SV=1	Enoph1	0.364367	0.0032507	0.0414983	+	0	27.136	30	6	9	1	6	257	28.6	4.92	30.49	10.3018	10.8292	10.4495	10.807	10.7486	10.9212	10.8214	11.242	10.6886	11.0322	REACTOME_METABOLISM_OF_AMINO_ACIDS_AND_DERIVATIVES|REACTOME_METHIONINE_SALVAGE_PATHWAY|REACTOME_SULFUR_AMINO_ACID_METABOLISM
E0CYH4	Isoform of Q8C6G8, WD repeat-containing protein 26 (Fragment) OS=Mus musculus OX=10090 GN=Wdr26 PE=1 SV=1	Wdr26	0.361907	0.00422148	0.0467997	+	0	28.933	13	6	8	0	6	625	68.8	6.15	28.3	9.94757	10.4622	9.97419	10.2178	9.86763	10.3461	9.92842	10.2981	9.9351	10.1382	NA
D3Z0H7	Isoform of Q99MD6, Thioredoxin reductase 3 OS=Mus musculus OX=10090 GN=Txnrd3 PE=1 SV=2	Txnrd3	0.361065	0.00463592	0.0489172	+	0	10.609	7	2	2	0	2	501	55	7.58	7.56	7.52283	7.74412	7.50172	7.82177	7.79376	8.05091	7.62087	8.06401	7.44195	8.00565	REACTOME_CELLULAR_RESPONSES_TO_EXTERNAL_STIMULI|REACTOME_DETOXIFICATION_OF_REACTIVE_OXYGEN_SPECIES|REACTOME_DISEASE|REACTOME_INFECTIOUS_DISEASE|REACTOME_INTERCONVERSION_OF_NUCLEOTIDE_DI_AND_TRIPHOSPHATES|REACTOME_METABOLISM_OF_AMINO_ACIDS_AND_DERIVATIVES|REACTOME_METABOLISM_OF_LIPIDS|REACTOME_METABOLISM_OF_NUCLEOTIDES|REACTOME_REGULATION_OF_LIPID_METABOLISM_BY_PPARALPHA|REACTOME_RNA_POLYMERASE_II…
Q61702	Inter-alpha-trypsin inhibitor heavy chain H1 OS=Mus musculus OX=10090 GN=Itih1 PE=1 SV=2	Itih1	0.360512	0.00324811	0.0414983	+	0	59.581	21	11	20	1	11	907	101	6.96	61.21	10.6964	11.2849	10.8693	11.1562	10.9681	11.2842	10.9898	11.3036	10.9347	11.2321	REACTOME_HEMOSTASIS|REACTOME_PLATELET_ACTIVATION_SIGNALING_AND_AGGREGATION|REACTOME_POST_TRANSLATIONAL_PROTEIN_MODIFICATION|REACTOME_REGULATION_OF_INSULIN_LIKE_GROWTH_FACTOR_IGF_TRANSPORT_AND_UPTAKE_BY_INSULIN_LIKE_GROWTH_FACTOR_BINDING_PROTEINS_IGFBPS_|REACTOME_RESPONSE_TO_ELEVATED_PLATELET_CYTOSOLIC_CA2_
Q9ET30	Transmembrane 9 superfamily member 3 OS=Mus musculus OX=10090 GN=Tm9sf3 PE=1 SV=1	Tm9sf3	0.35977	0.00245154	0.0378889	+	0	16.376	9	4	6	0	4	587	67.5	7.21	19.78	9.01978	9.29751	8.95214	9.16165	8.91194	9.33769	8.82458	9.33306	8.8176	9.19497	NA
Q9EQC5	N-terminal kinase-like protein OS=Mus musculus OX=10090 GN=Scyl1 PE=1 SV=1	Scyl1	0.358773	0.00133662	0.0320198	+	0	23.444	14	5	5	0	5	806	89.1	6.44	20.73	9.34389	9.65823	9.29412	9.50695	9.27066	9.70916	9.18913	9.65158	9.22979	9.59553	NA
Q9CQP2	Trafficking protein particle complex subunit 2 OS=Mus musculus OX=10090 GN=Trappc2 PE=1 SV=1	Trappc2	0.357408	0.00225747	0.0373564	+	0.001	8.752	21	3	4	1	1	140	16.4	6.52	8.89	7.20419	7.51251	6.94852	7.49269	7.22299	7.6111	7.16822	7.4581	7.14505	7.40161	REACTOME_ASPARAGINE_N_LINKED_GLYCOSYLATION|REACTOME_COPII_MEDIATED_VESICLE_TRANSPORT|REACTOME_ER_TO_GOLGI_ANTEROGRADE_TRANSPORT|REACTOME_MEMBRANE_TRAFFICKING|REACTOME_POST_TRANSLATIONAL_PROTEIN_MODIFICATION|REACTOME_RAB_GEFS_EXCHANGE_GTP_FOR_GDP_ON_RABS|REACTOME_RAB_REGULATION_OF_TRAFFICKING|REACTOME_TRANSPORT_TO_THE_GOLGI_AND_SUBSEQUENT_MODIFICATION|REACTOME_VESICLE_MEDIATED_TRANSPORT
Q60823	RAC-beta serine/threonine-protein kinase OS=Mus musculus OX=10090 GN=Akt2 PE=1 SV=1	Akt2	0.355213	0.00377948	0.0445767	+	0	33.268	16	8	11	0	5	481	55.7	6.37	34.16	10.4041	10.9324	10.5832	10.8519	10.5335	10.9908	10.6739	10.976	10.5073	10.7269	REACTOME_ACTIVATION_OF_BAD_AND_TRANSLOCATION_TO_MITOCHONDRIA_|REACTOME_ACTIVATION_OF_BH3_ONLY_PROTEINS|REACTOME_ADAPTIVE_IMMUNE_SYSTEM|REACTOME_AKT_PHOSPHORYLATES_TARGETS_IN_THE_CYTOSOL|REACTOME_AKT_PHOSPHORYLATES_TARGETS_IN_THE_NUCLEUS|REACTOME_BUTYRATE_RESPONSE_FACTOR_1_BRF1_BINDS_AND_DESTABILIZES_MRNA|REACTOME_CD28_CO_STIMULATION|REACTOME_CD28_DEPENDENT_PI3K_AKT_SIGNALING|REACTOME_CELL_CYCLE|R…
O70252	Heme oxygenase 2 OS=Mus musculus OX=10090 GN=Hmox2 PE=1 SV=1	Hmox2	0.354143	0.00101569	0.0289937	+	0	53.198	39	8	14	1	8	315	35.7	5.87	51.65	10.7472	11.1041	10.779	11.0053	10.5407	10.9989	10.6751	11.0978	10.6631	10.9697	REACTOME_HEME_DEGRADATION|REACTOME_INNATE_IMMUNE_SYSTEM|REACTOME_IRON_UPTAKE_AND_TRANSPORT|REACTOME_METABOLISM_OF_PORPHYRINS|REACTOME_NEUTROPHIL_DEGRANULATION|REACTOME_TRANSPORT_OF_SMALL_MOLECULES
A0A1D5RMM8	Isoform of Q8VI36, Paxillin OS=Mus musculus OX=10090 GN=Pxn PE=1 SV=2	Pxn	0.353446	0.00272241	0.0393675	+	0	33.568	8	7	11	1	7	1062	113.6	5.9	35.02	10.3005	10.84	10.4257	10.7633	10.3627	10.739	10.4438	10.741	10.4873	10.704	REACTOME_CELL_CELL_COMMUNICATION|REACTOME_CELL_EXTRACELLULAR_MATRIX_INTERACTIONS|REACTOME_CELL_JUNCTION_ORGANIZATION|REACTOME_GAB1_SIGNALOSOME|REACTOME_MUSCLE_CONTRACTION|REACTOME_PTK6_REGULATES_RHO_GTPASES_RAS_GTPASE_AND_MAP_KINASES|REACTOME_REGULATION_OF_CYTOSKELETAL_REMODELING_AND_CELL_SPREADING_BY_IPP_COMPLEX_COMPONENTS|REACTOME_SIGNALING_BY_EGFR|REACTOME_SIGNALING_BY_PTK6|REACTOME_SIGNALING_…
A0A286YDB7	Isoform of Q9CY50, Translocon-associated protein subunit alpha (Fragment) OS=Mus musculus OX=10090 GN=Ssr1 PE=1 SV=1	Ssr1	0.352853	0.000460039	0.0215744	+	0.001	7.861	30	3	4	0	3	115	13.1	3.81	10.99	10.6075	11.074	10.6703	10.9878	10.4749	10.8372	10.6198	10.9754	10.4866	10.7489	REACTOME_IRE1ALPHA_ACTIVATES_CHAPERONES|REACTOME_SRP_DEPENDENT_COTRANSLATIONAL_PROTEIN_TARGETING_TO_MEMBRANE|REACTOME_TRANSLATION|REACTOME_UNFOLDED_PROTEIN_RESPONSE_UPR_
A0A2R8W6G1	Isoform of P62878, E3 ubiquitin-protein ligase RBX1 OS=Mus musculus OX=10090 GN=Rbx1 PE=1 SV=1	Rbx1	0.349887	0.00242409	0.0378889	+	0.051	1.205	10	1	1	0	1	59	6.9	6.48	2.95	9.39338	9.85474	9.40694	9.57452	9.37394	9.79172	9.34397	9.73034	9.30781	9.62415	REACTOME_ADAPTIVE_IMMUNE_SYSTEM|REACTOME_ANTIGEN_PROCESSING_UBIQUITINATION_PROTEASOME_DEGRADATION|REACTOME_CELL_CYCLE|REACTOME_CELL_CYCLE_MITOTIC|REACTOME_CELLULAR_RESPONSE_TO_HYPOXIA|REACTOME_CELLULAR_RESPONSES_TO_EXTERNAL_STIMULI|REACTOME_CLASS_I_MHC_MEDIATED_ANTIGEN_PROCESSING_PRESENTATION|REACTOME_CYTOKINE_SIGNALING_IN_IMMUNE_SYSTEM|REACTOME_DEGRADATION_OF_BETA_CATENIN_BY_THE_DESTRUCTION_COMP…
B1AR50	Isoform of Q9DCD6, Gamma-aminobutyric acid receptor-associated protein OS=Mus musculus OX=10090 GN=Gabarap PE=1 SV=1	Gabarap	0.349654	0.00382281	0.044998	+	0.001	5.294	18	2	2	0	2	106	12.2	9.8	7.29	9.7171	9.85499	9.52168	9.87151	9.46063	9.89444	9.3526	9.82641	9.41386	9.76678	REACTOME_AUTOPHAGY|REACTOME_MEMBRANE_TRAFFICKING|REACTOME_RAB_REGULATION_OF_TRAFFICKING|REACTOME_TBC_RABGAPS|REACTOME_VESICLE_MEDIATED_TRANSPORT
Q9CXF4	TBC1 domain family member 15 OS=Mus musculus OX=10090 GN=Tbc1d15 PE=1 SV=1	Tbc1d15	0.347931	0.000207413	0.0166017	+	0	16.538	6	4	4	4	4	671	76.5	5.3	15.71	9.9201	10.2464	9.84125	10.1743	9.80536	10.1949	9.7113	10.1344	9.82674	10.0944	REACTOME_MEMBRANE_TRAFFICKING|REACTOME_RAB_REGULATION_OF_TRAFFICKING|REACTOME_TBC_RABGAPS|REACTOME_VESICLE_MEDIATED_TRANSPORT
Q8VHE0	Translocation protein SEC63 homolog OS=Mus musculus OX=10090 GN=Sec63 PE=1 SV=4	Sec63	0.344527	0.0035562	0.0433269	+	0	54.843	18	12	15	12	12	760	87.8	5.38	52.7	11.0139	11.5586	11.2508	11.5112	11.2682	11.4998	11.3037	11.6851	11.1592	11.4636	NA
Q99LP6	GrpE protein homolog 1, mitochondrial OS=Mus musculus OX=10090 GN=Grpel1 PE=1 SV=1	Grpel1	0.342726	0.000699914	0.0247652	+	0	48.745	44	9	15	9	9	217	24.3	8.38	54.96	11.5666	12.0057	11.764	11.9889	11.6571	12.0508	11.7183	12.0391	11.4467	11.782	REACTOME_MITOCHONDRIAL_PROTEIN_IMPORT|REACTOME_PROTEIN_LOCALIZATION
O88851	Putative hydrolase RBBP9 OS=Mus musculus OX=10090 GN=Rbbp9 PE=1 SV=2	Rbbp9	0.340574	0.00270458	0.0393675	+	0	18.588	38	4	5	4	4	186	20.9	5.97	18.24	8.7385	9.03578	8.7009	9.03966	8.80217	8.99818	8.86906	9.2263	8.64483	9.15841	NA
Q9ET22	Dipeptidyl peptidase 2 OS=Mus musculus OX=10090 GN=Dpp7 PE=1 SV=2	Dpp7	0.340233	0.0018892	0.0348785	+	0.062	1.126	1	1	1	1	1	506	56.2	5.39	1.69	7.91715	8.13724	7.84377	8.30852	8.04767	8.37737	7.96611	8.22701	7.75294	8.17867	REACTOME_INNATE_IMMUNE_SYSTEM|REACTOME_NEUTROPHIL_DEGRANULATION
Q921Q3	Chitobiosyldiphosphodolichol beta-mannosyltransferase OS=Mus musculus OX=10090 GN=Alg1 PE=1 SV=3	Alg1	0.339509	0.00200598	0.035383	+	0	10.948	6	3	3	0	3	482	54.4	8.37	8.02	8.77286	9.2487	8.94926	9.18427	9.01194	9.24559	9.00261	9.35248	9.0562	9.45937	REACTOME_ASPARAGINE_N_LINKED_GLYCOSYLATION|REACTOME_BIOSYNTHESIS_OF_THE_N_GLYCAN_PRECURSOR_DOLICHOL_LIPID_LINKED_OLIGOSACCHARIDE_LLO_AND_TRANSFER_TO_A_NASCENT_PROTEIN|REACTOME_DISEASE|REACTOME_DISEASES_ASSOCIATED_WITH_N_GLYCOSYLATION_OF_PROTEINS|REACTOME_DISEASES_OF_GLYCOSYLATION|REACTOME_DISEASES_OF_METABOLISM|REACTOME_POST_TRANSLATIONAL_PROTEIN_MODIFICATION
Q9CXJ1	Probable glutamate--tRNA ligase, mitochondrial OS=Mus musculus OX=10090 GN=Ears2 PE=1 SV=1	Ears2	0.339047	0.000602433	0.0237047	+	0.001	6.972	5	2	2	2	2	523	58.3	8.75	6.08	7.86459	8.23793	7.94281	8.30203	8.09644	8.38373	8.14451	8.3833	7.85594	8.29255	REACTOME_MITOCHONDRIAL_TRNA_AMINOACYLATION|REACTOME_TRANSLATION|REACTOME_TRNA_AMINOACYLATION
Q8CD91	SPARC-related modular calcium-binding protein 2 OS=Mus musculus OX=10090 GN=Smoc2 PE=1 SV=1	Smoc2	0.338927	0.00250392	0.0384	+	0.001	8.093	8	4	5	0	4	447	49.9	8.51	6.8	9.10138	9.56072	9.04061	9.35802	8.98318	9.41998	8.98765	9.17143	9.03137	9.32868	NA
P56380	Bis(5'-nucleosyl)-tetraphosphatase [asymmetrical] OS=Mus musculus OX=10090 GN=Nudt2 PE=1 SV=3	Nudt2	0.33814	0.00190031	0.0348785	+	0	37.065	54	6	9	6	6	147	17	6.28	31.53	9.79668	10.3043	10.0453	10.4005	10.1851	10.471	10.1771	10.4127	10.0236	10.3301	REACTOME_CELLULAR_RESPONSES_TO_EXTERNAL_STIMULI|REACTOME_DETOXIFICATION_OF_REACTIVE_OXYGEN_SPECIES
Q62283	Tetraspanin-7 OS=Mus musculus OX=10090 GN=Tspan7 PE=1 SV=2	Tspan7	0.338069	0.000377172	0.0194562	+	0.015	2.227	3	1	1	0	1	249	27.5	7.2	2.25	7.10279	7.33726	7.16408	7.55572	7.25225	7.58631	7.03638	7.3594	7.1741	7.58124	REACTOME_CELL_SURFACE_INTERACTIONS_AT_THE_VASCULAR_WALL|REACTOME_HEMOSTASIS|REACTOME_NEURONAL_SYSTEM|REACTOME_NEUROTRANSMITTER_RECEPTORS_AND_POSTSYNAPTIC_SIGNAL_TRANSMISSION|REACTOME_TRAFFICKING_OF_AMPA_RECEPTORS|REACTOME_TRAFFICKING_OF_GLUR2_CONTAINING_AMPA_RECEPTORS|REACTOME_TRANSMISSION_ACROSS_CHEMICAL_SYNAPSES
Q9DBU3	Serine/threonine-protein kinase RIO3 OS=Mus musculus OX=10090 GN=Riok3 PE=1 SV=3	Riok3	0.335769	0.00063807	0.024015	+	0.001	8.174	6	3	4	0	3	519	58.7	5.69	11.53	9.41705	9.73257	9.42633	9.79224	9.59864	9.83508	9.53846	9.85226	9.43864	9.88581	REACTOME_METABOLISM_OF_RNA|REACTOME_RRNA_PROCESSING
Q9Z2G6	Protein sel-1 homolog 1 OS=Mus musculus OX=10090 GN=Sel1l PE=1 SV=2	Sel1l	0.334844	0.000341418	0.0194562	+	0	18.468	7	3	3	1	3	790	88.3	5.57	13.89	8.85246	9.12351	8.70944	9.10004	8.83005	9.09003	8.77215	9.12464	8.6975	9.09759	REACTOME_ABC_FAMILY_PROTEINS_MEDIATED_TRANSPORT|REACTOME_ABC_TRANSPORTER_DISORDERS|REACTOME_ASPARAGINE_N_LINKED_GLYCOSYLATION|REACTOME_CALNEXIN_CALRETICULIN_CYCLE|REACTOME_DEFECTIVE_CFTR_CAUSES_CYSTIC_FIBROSIS|REACTOME_DISEASE|REACTOME_DISEASES_OF_SIGNAL_TRANSDUCTION_BY_GROWTH_FACTOR_RECEPTORS_AND_SECOND_MESSENGERS|REACTOME_DISORDERS_OF_TRANSMEMBRANE_TRANSPORTERS|REACTOME_ER_QUALITY_CONTROL_COMPA…
Q8VBT0	Thioredoxin-related transmembrane protein 1 OS=Mus musculus OX=10090 GN=Tmx1 PE=1 SV=1	Tmx1	0.32906	0.00324226	0.0414983	+	0	18.135	14	5	7	3	5	278	31.4	5.29	19.38	9.95829	10.2012	9.94487	10.2117	9.79307	10.2544	9.83415	10.2845	9.93911	10.163	NA
Q62082	Myosin regulatory light chain 10 OS=Mus musculus OX=10090 GN=Myl10 PE=2 SV=1	Myl10	0.327042	0.00326558	0.0414983	+	0	47.735	48	9	16	0	6	202	22.5	4.98	54.64	10.6115	11.0435	10.77	11.2092	10.8462	11.1118	10.9152	11.2499	10.8919	11.0556	REACTOME_MUSCLE_CONTRACTION|REACTOME_SMOOTH_MUSCLE_CONTRACTION
O54962	Barrier-to-autointegration factor OS=Mus musculus OX=10090 GN=Banf1 PE=1 SV=1	Banf1	0.324641	0.0013632	0.0320198	+	0.004	3.37	8	1	3	1	1	89	10.1	6.09	7.41	9.14881	9.40352	9.12089	9.4705	9.13389	9.35284	9.13509	9.48303	8.9555	9.4075	REACTOME_2_LTR_CIRCLE_FORMATION|REACTOME_APOBEC3G_MEDIATED_RESISTANCE_TO_HIV_1_INFECTION|REACTOME_CELL_CYCLE|REACTOME_CELL_CYCLE_MITOTIC|REACTOME_DISEASE|REACTOME_EARLY_PHASE_OF_HIV_LIFE_CYCLE|REACTOME_HIV_INFECTION|REACTOME_HIV_LIFE_CYCLE|REACTOME_HOST_INTERACTIONS_OF_HIV_FACTORS|REACTOME_INFECTIOUS_DISEASE|REACTOME_INITIATION_OF_NUCLEAR_ENVELOPE_NE_REFORMATION|REACTOME_INTEGRATION_OF_PROVIRUS|R…
Q8K310	Matrin-3 OS=Mus musculus OX=10090 GN=Matr3 PE=1 SV=1	Matr3	0.323769	0.00129452	0.0319589	+	0	42.266	14	9	11	0	9	846	94.6	6.25	35.8	10.8911	11.2417	10.9243	11.2314	10.9149	11.3067	10.8327	11.2262	10.9292	11.105	NA
O70201-2	Isoform of O70201, Isoform 2 of Baculoviral IAP repeat-containing protein 5 OS=Mus musculus OX=10090 GN=Birc5 PE=1 SV=1	Birc5	0.323632	0.00417748	0.046663	+	0.058	1.151	7	1	1	1	1	121	14.1	5.31	2.21	6.31054	6.5651	6.47633	6.8641	6.71731	6.85819	6.51913	6.95489	6.46352	6.86271	REACTOME_CELL_CYCLE|REACTOME_CELL_CYCLE_CHECKPOINTS|REACTOME_CELL_CYCLE_MITOTIC|REACTOME_CYTOKINE_SIGNALING_IN_IMMUNE_SYSTEM|REACTOME_INTERLEUKIN_4_AND_INTERLEUKIN_13_SIGNALING|REACTOME_M_PHASE|REACTOME_MITOTIC_METAPHASE_AND_ANAPHASE|REACTOME_MITOTIC_PROMETAPHASE|REACTOME_MITOTIC_SPINDLE_CHECKPOINT|REACTOME_NEDDYLATION|REACTOME_POST_TRANSLATIONAL_PROTEIN_MODIFICATION|REACTOME_RESOLUTION_OF_SISTER…
A0A1D5RM94	Isoform of Q6PDL0, Dynein light intermediate chain OS=Mus musculus OX=10090 GN=Dync1li2 PE=1 SV=1	Dync1li2	0.322425	0.00162409	0.0342742	+	0	40.463	26	9	14	0	8	470	51.5	6.54	48.79	10.7995	11.1801	10.8464	11.0611	10.7219	11.1012	10.7413	11.1548	10.7065	10.9307	REACTOME_ADAPTIVE_IMMUNE_SYSTEM|REACTOME_AGGREPHAGY|REACTOME_ASPARAGINE_N_LINKED_GLYCOSYLATION|REACTOME_AUTOPHAGY|REACTOME_CELL_CYCLE|REACTOME_CELL_CYCLE_CHECKPOINTS|REACTOME_CELL_CYCLE_MITOTIC|REACTOME_CELLULAR_RESPONSES_TO_EXTERNAL_STIMULI|REACTOME_COPI_INDEPENDENT_GOLGI_TO_ER_RETROGRADE_TRAFFIC|REACTOME_COPI_MEDIATED_ANTEROGRADE_TRANSPORT|REACTOME_DISEASE|REACTOME_ER_TO_GOLGI_ANTEROGRADE_TRANS…
G5E8V9	Arfaptin-1 OS=Mus musculus OX=10090 GN=Arfip1 PE=1 SV=1	Arfip1	0.319107	0.00268972	0.039363	+	0	28.715	20	5	11	0	5	373	41.5	6.76	36.92	10.3028	10.7315	10.4532	10.7066	10.3447	10.7778	10.3692	10.6573	10.3471	10.5393	NA
P58021	Transmembrane 9 superfamily member 2 OS=Mus musculus OX=10090 GN=Tm9sf2 PE=1 SV=1	Tm9sf2	0.318973	0.000190403	0.0165307	+	0	14.108	9	5	5	2	5	662	75.3	7.43	9.52	9.09643	9.42561	9.00831	9.23617	8.98885	9.36146	9.03921	9.36817	8.96987	9.30612	NA
Q8BG51	Mitochondrial Rho GTPase 1 OS=Mus musculus OX=10090 GN=Rhot1 PE=1 SV=1	Rhot1	0.31773	0.000181288	0.0162308	+	0	14.823	8	5	6	0	3	631	72.2	6.49	15.39	9.69745	10.0466	9.79358	10.0531	9.90886	10.2049	9.84914	10.1397	9.6207	10.0141	REACTOME_DEUBIQUITINATION|REACTOME_POST_TRANSLATIONAL_PROTEIN_MODIFICATION|REACTOME_RHO_GTPASE_CYCLE|REACTOME_SIGNALING_BY_RHO_GTPASES|REACTOME_UB_SPECIFIC_PROCESSING_PROTEASES
E9Q912	Rap1 GTPase-GDP dissociation stimulator 1 OS=Mus musculus OX=10090 GN=Rap1gds1 PE=2 SV=1	Rap1gds1	0.316268	5.46698e-07	0.00323044	+	0	44.644	18	8	12	0	8	607	66	5.35	41.6	10.3709	10.6842	10.3293	10.6297	10.3061	10.6249	10.348	10.6825	10.2625	10.5768	NA
A2A8U2	Transmembrane protein 201 OS=Mus musculus OX=10090 GN=Tmem201 PE=1 SV=1	Tmem201	0.314815	0.00269126	0.039363	+	0	18.676	7	4	6	0	4	664	72.5	9.2	16.16	9.43505	9.89014	9.28112	9.60604	9.44734	9.6068	9.31266	9.65469	9.2645	9.55708	NA
Q8VBZ3	Cleft lip and palate transmembrane protein 1 homolog OS=Mus musculus OX=10090 GN=Clptm1 PE=1 SV=1	Clptm1	0.314711	0.00185047	0.0348785	+	0	11.115	6	4	5	4	4	664	75.2	6.3	8.71	8.73929	9.0123	8.75669	9.0508	9.03641	9.23602	8.9066	9.25619	8.8351	9.29233	NA
O35344	Importin subunit alpha-4 OS=Mus musculus OX=10090 GN=Kpna3 PE=1 SV=1	Kpna3	0.312557	4.40838e-05	0.0116169	+	0	30.759	12	6	10	3	3	521	57.7	4.94	34.53	11.248	11.6139	11.3061	11.5815	11.3033	11.598	11.3212	11.6546	11.2705	11.5639	REACTOME_ANTIVIRAL_MECHANISM_BY_IFN_STIMULATED_GENES|REACTOME_CYTOKINE_SIGNALING_IN_IMMUNE_SYSTEM|REACTOME_DISEASE|REACTOME_INFECTIOUS_DISEASE|REACTOME_INFLUENZA_INFECTION|REACTOME_INTERFERON_SIGNALING|REACTOME_NS1_MEDIATED_EFFECTS_ON_HOST_PATHWAYS
Q9DBR3	Armadillo repeat-containing protein 8 OS=Mus musculus OX=10090 GN=Armc8 PE=1 SV=2	Armc8	0.311866	0.00283595	0.039639	+	0	22.217	8	5	6	0	5	673	75.3	6.73	18.75	10.1261	10.5458	10.2149	10.3936	10.103	10.5211	10.2282	10.5281	10.21	10.453	REACTOME_INNATE_IMMUNE_SYSTEM|REACTOME_NEUTROPHIL_DEGRANULATION
P07742	Ribonucleoside-diphosphate reductase large subunit OS=Mus musculus OX=10090 GN=Rrm1 PE=1 SV=2	Rrm1	0.311458	0.00383173	0.0450133	+	0	15.643	7	5	6	5	5	792	90.2	6.7	16.61	9.93676	10.4324	10.1112	10.375	10.2836	10.464	10.1639	10.4802	10.1419	10.443	REACTOME_INTERCONVERSION_OF_NUCLEOTIDE_DI_AND_TRIPHOSPHATES|REACTOME_METABOLISM_OF_NUCLEOTIDES
Q8BYA0	Tubulin-specific chaperone D OS=Mus musculus OX=10090 GN=Tbcd PE=1 SV=1	Tbcd	0.30844	0.000454334	0.0214773	+	0	12.085	3	4	5	4	4	1196	133.2	6.51	11.64	9.98157	10.3266	9.97277	10.2449	9.8958	10.2838	9.93054	10.2484	9.97716	10.1964	REACTOME_POST_CHAPERONIN_TUBULIN_FOLDING_PATHWAY|REACTOME_PROTEIN_FOLDING
O70209	PDZ and LIM domain protein 3 OS=Mus musculus OX=10090 GN=Pdlim3 PE=1 SV=1	Pdlim3	0.307958	0.00359542	0.0433839	+	0	95.231	59	12	71	2	2	316	34.3	7.91	192.88	7.84404	7.97299	7.67242	8.03842	7.9509	8.2279	7.75775	8.10552	7.73854	8.15862	NA
G3UYF9	Isoform of Q03958, Prefoldin subunit 6 OS=Mus musculus OX=10090 GN=Pfdn6 PE=1 SV=1	Pfdn6	0.306511	3.67763e-05	0.0114374	+	0	33.333	45	7	7	0	7	101	11.4	8.44	27.97	10.7499	11.0248	10.7898	11.086	10.702	10.9923	10.7178	11.0819	10.7177	11.0248	REACTOME_COOPERATION_OF_PREFOLDIN_AND_TRIC_CCT_IN_ACTIN_AND_TUBULIN_FOLDING|REACTOME_PROTEIN_FOLDING
Q9Z1D1	Eukaryotic translation initiation factor 3 subunit G OS=Mus musculus OX=10090 GN=Eif3g PE=1 SV=2	Eif3g	0.302629	5.5193e-05	0.0116169	+	0	22.971	15	5	7	5	5	320	35.6	5.9	24.17	9.96302	10.2297	9.85976	10.1859	9.90593	10.2592	9.88741	10.1865	9.82916	10.0973	REACTOME_ACTIVATION_OF_THE_MRNA_UPON_BINDING_OF_THE_CAP_BINDING_COMPLEX_AND_EIFS_AND_SUBSEQUENT_BINDING_TO_43S|REACTOME_EUKARYOTIC_TRANSLATION_INITIATION|REACTOME_TRANSLATION
E9QPR4	Isoform of Q811L6, Non-specific serine/threonine protein kinase OS=Mus musculus OX=10090 GN=Mast4 PE=1 SV=1	Mast4	0.302527	0.00282303	0.039639	+	0.001	7.246	1	1	1	0	1	2441	265.9	8.65	4.32	6.98727	7.30406	7.02949	7.425	7.44153	7.62738	7.19998	7.40655	7.13633	7.54426	NA
P63073	Eukaryotic translation initiation factor 4E OS=Mus musculus OX=10090 GN=Eif4e PE=1 SV=1	Eif4e	0.301826	0.00423451	0.0467997	+	0	26.934	29	6	16	0	6	217	25	6.15	43.91	11.0508	11.5494	11.1738	11.4823	11.1904	11.4082	11.2472	11.4823	11.1067	11.3558	REACTOME_ACTIVATION_OF_THE_MRNA_UPON_BINDING_OF_THE_CAP_BINDING_COMPLEX_AND_EIFS_AND_SUBSEQUENT_BINDING_TO_43S|REACTOME_ANTIVIRAL_MECHANISM_BY_IFN_STIMULATED_GENES|REACTOME_CYTOKINE_SIGNALING_IN_IMMUNE_SYSTEM|REACTOME_DEADENYLATION_DEPENDENT_MRNA_DECAY|REACTOME_DEADENYLATION_OF_MRNA|REACTOME_EUKARYOTIC_TRANSLATION_INITIATION|REACTOME_INTERFERON_SIGNALING|REACTOME_METABOLISM_OF_RNA|REACTOME_MTOR_S…
Q8BHG2	CXXC motif containing zinc binding protein OS=Mus musculus OX=10090 GN=Czib PE=1 SV=1	Czib	0.301187	0.00198883	0.035383	+	0	21.047	31	4	7	0	4	160	18	5.12	24.52	9.62368	10.0785	9.77175	10.0428	9.86944	10.1219	9.90725	10.1188	9.74975	10.0659	NA
O35900	U6 snRNA-associated Sm-like protein LSm2 OS=Mus musculus OX=10090 GN=Lsm2 PE=1 SV=1	Lsm2	0.300643	2.73379e-05	0.00971849	+	0	12.64	28	2	5	0	2	95	10.8	6.52	10.58	9.72107	10.0256	9.79599	10.066	9.86546	10.1326	9.8979	10.2282	9.83793	10.1692	REACTOME_DEADENYLATION_DEPENDENT_MRNA_DECAY|REACTOME_METABOLISM_OF_RNA|REACTOME_MRNA_DECAY_BY_5_TO_3_EXORIBONUCLEASE|REACTOME_MRNA_SPLICING|REACTOME_MRNA_SPLICING_MINOR_PATHWAY|REACTOME_PROCESSING_OF_CAPPED_INTRON_CONTAINING_PRE_MRNA
Q9JKV5	Secretory carrier-associated membrane protein 4 OS=Mus musculus OX=10090 GN=Scamp4 PE=1 SV=1	Scamp4	0.299061	0.00117003	0.0310773	+	0.003	3.645	5	1	1	1	1	230	25.3	8.66	2.42	7.26816	7.44221	6.99854	7.29743	7.1407	7.54116	7.06985	7.38009	7.14288	7.45454	NA
Q3U7U3	F-box only protein 7 OS=Mus musculus OX=10090 GN=Fbxo7 PE=1 SV=2	Fbxo7	0.298884	0.00181698	0.0348785	+	0.001	6.021	3	1	2	1	1	523	57.6	5.83	9.49	7.59353	7.98048	7.63699	7.99647	7.80065	7.96091	7.73684	8.06465	7.85394	8.11386	REACTOME_ADAPTIVE_IMMUNE_SYSTEM|REACTOME_ANTIGEN_PROCESSING_UBIQUITINATION_PROTEASOME_DEGRADATION|REACTOME_CLASS_I_MHC_MEDIATED_ANTIGEN_PROCESSING_PRESENTATION|REACTOME_NEDDYLATION|REACTOME_POST_TRANSLATIONAL_PROTEIN_MODIFICATION
Q8VCL2	Protein SCO2 homolog, mitochondrial OS=Mus musculus OX=10090 GN=Sco2 PE=1 SV=1	Sco2	0.298715	0.00261905	0.0388989	+	0.001	6.621	16	2	2	2	2	255	28.9	8.29	6.19	7.34377	7.508	7.30805	7.55905	7.35337	7.64148	7.21228	7.58503	7.13524	7.55272	REACTOME_RESPIRATORY_ELECTRON_TRANSPORT|REACTOME_RESPIRATORY_ELECTRON_TRANSPORT_ATP_SYNTHESIS_BY_CHEMIOSMOTIC_COUPLING_AND_HEAT_PRODUCTION_BY_UNCOUPLING_PROTEINS_|REACTOME_RNA_POLYMERASE_II_TRANSCRIPTION|REACTOME_THE_CITRIC_ACID_TCA_CYCLE_AND_RESPIRATORY_ELECTRON_TRANSPORT|REACTOME_TP53_REGULATES_METABOLIC_GENES|REACTOME_TRANSCRIPTIONAL_REGULATION_BY_TP53
Q8BHF7	CDP-diacylglycerol--glycerol-3-phosphate 3-phosphatidyltransferase, mitochondrial OS=Mus musculus OX=10090 GN=Pgs1 PE=1 SV=1	Pgs1	0.296428	0.00316299	0.0413498	+	0	18.874	8	4	6	1	4	553	62.5	8.9	20.31	9.11466	9.51304	9.14072	9.50365	9.3558	9.56741	9.3329	9.49221	9.20115	9.55106	REACTOME_GLYCEROPHOSPHOLIPID_BIOSYNTHESIS|REACTOME_METABOLISM_OF_LIPIDS|REACTOME_PHOSPHOLIPID_METABOLISM|REACTOME_SYNTHESIS_OF_PG
Q9WTX5	S-phase kinase-associated protein 1 OS=Mus musculus OX=10090 GN=Skp1 PE=1 SV=3	Skp1	0.296205	0.00180037	0.0348785	+	0	35.574	31	6	15	5	6	163	18.7	4.54	42.92	11.7439	12.177	11.8703	12.2039	11.9111	12.1763	11.9344	12.1802	11.766	11.9693	REACTOME_ADAPTIVE_IMMUNE_SYSTEM|REACTOME_ANTIGEN_PROCESSING_UBIQUITINATION_PROTEASOME_DEGRADATION|REACTOME_APC_C_MEDIATED_DEGRADATION_OF_CELL_CYCLE_PROTEINS|REACTOME_C_TYPE_LECTIN_RECEPTORS_CLRS_|REACTOME_CELL_CYCLE|REACTOME_CELL_CYCLE_MITOTIC|REACTOME_CIRCADIAN_CLOCK|REACTOME_CLASS_I_MHC_MEDIATED_ANTIGEN_PROCESSING_PRESENTATION|REACTOME_CLEC7A_DECTIN_1_SIGNALING|REACTOME_CYCLIN_A_CDK2_ASSOCIATED…
Q8BUU7	Isoform of Q68FH4, N-acetylgalactosamine kinase OS=Mus musculus OX=10090 GN=Galk2 PE=1 SV=1	Galk2	0.296098	0.00107473	0.0292817	+	0.004	3.214	2	1	2	0	1	447	49.3	6.73	6.44	9.22231	9.56308	9.268	9.59678	9.43326	9.64595	9.40213	9.61605	9.22301	9.60735	NA
B1AUN2	Eukaryotic translation initiation factor 2B, subunit 3 OS=Mus musculus OX=10090 GN=Eif2b3 PE=1 SV=1	Eif2b3	0.296071	7.75715e-05	0.0120624	+	0	30.661	23	8	9	0	8	452	50.5	6.74	30.56	10.4301	10.7943	10.48	10.7644	10.6115	10.8916	10.6508	10.9105	10.461	10.7529	REACTOME_EUKARYOTIC_TRANSLATION_INITIATION|REACTOME_RECYCLING_OF_EIF2_GDP|REACTOME_TRANSLATION
Q8VDQ1	Prostaglandin reductase 2 OS=Mus musculus OX=10090 GN=Ptgr2 PE=1 SV=2	Ptgr2	0.296055	0.00284429	0.039639	+	0	31.868	18	5	10	1	5	351	38	5.41	27.47	10.1218	10.5706	10.2826	10.5704	10.4029	10.6349	10.4594	10.6432	10.3165	10.6444	REACTOME_ARACHIDONIC_ACID_METABOLISM|REACTOME_FATTY_ACID_METABOLISM|REACTOME_METABOLISM_OF_LIPIDS|REACTOME_SYNTHESIS_OF_PROSTAGLANDINS_PG_AND_THROMBOXANES_TX_
Q8R034	Anaphase-promoting complex subunit 13 OS=Mus musculus OX=10090 GN=Anapc13 PE=3 SV=1	Anapc13	0.29503	0.0041458	0.0463968	+	0.001	7.04	18	2	2	2	2	74	8.3	4.18	3.7	7.5963	8.01817	7.55585	7.92118	7.80751	7.93342	7.68687	7.96075	7.65212	7.94029	REACTOME_ADAPTIVE_IMMUNE_SYSTEM|REACTOME_ANTIGEN_PROCESSING_UBIQUITINATION_PROTEASOME_DEGRADATION|REACTOME_CLASS_I_MHC_MEDIATED_ANTIGEN_PROCESSING_PRESENTATION
Q63829	COMM domain-containing protein 3 OS=Mus musculus OX=10090 GN=Commd3 PE=1 SV=1	Commd3	0.29475	0.00199636	0.035383	+	0.001	5.028	6	1	2	1	1	195	22	5.59	7.48	7.65187	7.99944	7.70357	7.95138	7.86674	8.03832	7.73372	8.02927	7.58054	7.99179	REACTOME_INNATE_IMMUNE_SYSTEM|REACTOME_NEDDYLATION|REACTOME_NEUTROPHIL_DEGRANULATION|REACTOME_POST_TRANSLATIONAL_PROTEIN_MODIFICATION
A0A338P6D9	Isoform of Q8CHW4, Translation initiation factor eIF-2B subunit epsilon (Fragment) OS=Mus musculus OX=10090 GN=Eif2b5 PE=1 SV=1	Eif2b5	0.294028	0.00146513	0.0326697	+	0	11.43	18	4	4	0	3	303	34.4	4.45	9.19	9.3385	9.66734	9.3964	9.57933	9.41338	9.74502	9.35339	9.74668	9.37292	9.60635	REACTOME_EUKARYOTIC_TRANSLATION_INITIATION|REACTOME_RECYCLING_OF_EIF2_GDP|REACTOME_TRANSLATION
Q3UFS0	Protein zyg-11 homolog B OS=Mus musculus OX=10090 GN=Zyg11b PE=1 SV=2	Zyg11b	0.293551	0.00479833	0.0495688	+	0.001	9.199	4	3	3	1	3	744	83.9	6.87	6.85	9.27219	9.66155	9.3079	9.56758	9.4431	9.66335	9.49242	9.6538	9.17869	9.61577	NA
A0A2I3BR95	Isoform of Q61097, Kinase suppressor of Ras 1 OS=Mus musculus OX=10090 GN=Ksr1 PE=1 SV=1	Ksr1	0.293486	0.00158154	0.0337376	+	0.001	9.369	4	4	5	0	4	818	91.3	8.21	10.2	9.57108	9.9979	9.67418	9.95788	9.77747	10.0037	9.79039	10.0029	9.64791	9.96608	REACTOME_CYTOKINE_SIGNALING_IN_IMMUNE_SYSTEM|REACTOME_DISEASE|REACTOME_DISEASES_OF_SIGNAL_TRANSDUCTION_BY_GROWTH_FACTOR_RECEPTORS_AND_SECOND_MESSENGERS|REACTOME_FLT3_SIGNALING|REACTOME_MAP2K_AND_MAPK_ACTIVATION|REACTOME_MAPK_FAMILY_SIGNALING_CASCADES|REACTOME_NEGATIVE_REGULATION_OF_MAPK_PATHWAY|REACTOME_ONCOGENIC_MAPK_SIGNALING|REACTOME_RAF_ACTIVATION|REACTOME_SIGNALING_BY_BRAF_AND_RAF_FUSIONS|RE…
Q9JI46	Diphosphoinositol polyphosphate phosphohydrolase 1 OS=Mus musculus OX=10090 GN=Nudt3 PE=1 SV=1	Nudt3	0.291245	0.00195284	0.0351809	+	0.001	8.758	13	2	2	0	2	168	19	6.34	5.95	7.56646	7.86328	7.57918	7.86896	7.68897	8.01178	7.6056	7.75473	7.56596	7.96364	REACTOME_INOSITOL_PHOSPHATE_METABOLISM|REACTOME_SYNTHESIS_OF_PYROPHOSPHATES_IN_THE_CYTOSOL
Q9ERE7	LRP chaperone MESD OS=Mus musculus OX=10090 GN=Mesd PE=1 SV=1	Mesd	0.289652	0.00305301	0.040449	+	0	22.413	21	5	8	2	5	224	25.2	6.34	22.76	11.3941	11.8083	11.4601	11.7756	11.3373	11.6746	11.5238	11.7523	11.4546	11.6074	NA
Q80X73	Protein pelota homolog OS=Mus musculus OX=10090 GN=Pelo PE=1 SV=3	Pelo	0.289003	0.00385223	0.0450134	+	0	21.67	17	6	7	6	6	385	43.3	5.99	15.22	9.2219	9.67421	9.36757	9.64989	9.54576	9.73122	9.55402	9.75583	9.3525	9.67562	NA
Q6IRU5-2	Isoform of Q6IRU5, Isoform 2 of Clathrin light chain B OS=Mus musculus OX=10090 GN=Cltb PE=1 SV=1	Cltb	0.288968	0.00431732	0.0470684	+	0	34.641	33	8	12	1	8	211	23.2	4.68	38.33	10.9004	11.2561	10.8948	11.2702	10.8109	11.1887	10.9841	11.148	10.8709	11.0429	REACTOME_ADAPTIVE_IMMUNE_SYSTEM|REACTOME_BETA_CATENIN_INDEPENDENT_WNT_SIGNALING|REACTOME_CARGO_RECOGNITION_FOR_CLATHRIN_MEDIATED_ENDOCYTOSIS|REACTOME_CLATHRIN_MEDIATED_ENDOCYTOSIS|REACTOME_DEVELOPMENTAL_BIOLOGY|REACTOME_DISEASE|REACTOME_EPH_EPHRIN_MEDIATED_REPULSION_OF_CELLS|REACTOME_EPH_EPHRIN_SIGNALING|REACTOME_GAP_JUNCTION_DEGRADATION|REACTOME_GAP_JUNCTION_TRAFFICKING_AND_REGULATION|REACTOME_G…
Q91VY9	Zinc finger protein 622 OS=Mus musculus OX=10090 GN=Znf622 PE=1 SV=1	Znf622	0.286107	0.00135	0.0320198	+	0	10.408	5	2	2	2	2	476	53.4	6.1	8.51	8.28825	8.62049	8.29599	8.6551	8.34334	8.66707	8.34865	8.50798	8.3342	8.59033	NA
Q80Y17	Lethal(2) giant larvae protein homolog 1 OS=Mus musculus OX=10090 GN=Llgl1 PE=1 SV=1	Llgl1	0.285469	0.00225858	0.0373564	+	0.001	8.857	2	2	3	0	2	1036	112.5	6.48	10.97	8.90017	9.15424	8.80785	9.07253	8.75059	9.18245	8.86398	9.15941	8.85374	9.03504	NA
Q60902	Epidermal growth factor receptor substrate 15-like 1 OS=Mus musculus OX=10090 GN=Eps15l1 PE=1 SV=3	Eps15l1	0.283877	0.000378654	0.0194562	+	0	64.328	22	15	19	0	15	907	99.2	5.02	54	10.9172	11.2904	11.002	11.2349	10.9412	11.237	11.0556	11.2902	10.9103	11.1931	REACTOME_CARGO_RECOGNITION_FOR_CLATHRIN_MEDIATED_ENDOCYTOSIS|REACTOME_CLATHRIN_MEDIATED_ENDOCYTOSIS|REACTOME_DISEASE|REACTOME_EGFR_DOWNREGULATION|REACTOME_INFECTIOUS_DISEASE|REACTOME_INLB_MEDIATED_ENTRY_OF_LISTERIA_MONOCYTOGENES_INTO_HOST_CELL|REACTOME_LISTERIA_MONOCYTOGENES_ENTRY_INTO_HOST_CELLS|REACTOME_MEMBRANE_TRAFFICKING|REACTOME_NEGATIVE_REGULATION_OF_MET_ACTIVITY|REACTOME_SIGNALING_BY_EGFR…
Q9CR39	WD repeat domain phosphoinositide-interacting protein 3 OS=Mus musculus OX=10090 GN=Wdr45b PE=1 SV=2	Wdr45b	0.283569	0.00474917	0.0493999	+	0	11.382	9	2	2	1	2	344	38	7.56	9.99	8.41195	8.64539	8.53548	8.81963	8.80397	9.03357	8.78792	8.98342	8.55715	9.03231	REACTOME_AUTOPHAGY
O70274	Protein tyrosine phosphatase type IVA 2 OS=Mus musculus OX=10090 GN=Ptp4a2 PE=1 SV=1	Ptp4a2	0.28214	0.0034296	0.0423455	+	0	11.261	13	2	3	0	2	167	19.1	8.37	8.7	9.47478	9.93124	9.47319	9.75844	9.57252	9.80056	9.66304	9.89775	9.58361	9.78985	REACTOME_POST_TRANSLATIONAL_PROTEIN_MODIFICATION|REACTOME_RAB_GERANYLGERANYLATION
Q8R2Y0	Monoacylglycerol lipase ABHD6 OS=Mus musculus OX=10090 GN=Abhd6 PE=1 SV=1	Abhd6	0.281851	0.00390798	0.0451732	+	0	16.853	12	4	4	0	4	336	38.2	8.47	12.04	8.84413	9.16652	8.86677	8.96241	8.87024	9.17632	8.85414	9.19399	8.83544	9.18073	REACTOME_ARACHIDONATE_PRODUCTION_FROM_DAG|REACTOME_EFFECTS_OF_PIP2_HYDROLYSIS|REACTOME_G_ALPHA_Q_SIGNALLING_EVENTS|REACTOME_HEMOSTASIS|REACTOME_PLATELET_ACTIVATION_SIGNALING_AND_AGGREGATION|REACTOME_SIGNALING_BY_GPCR
Q9D898	Actin-related protein 2/3 complex subunit 5-like protein OS=Mus musculus OX=10090 GN=Arpc5l PE=1 SV=1	Arpc5l	0.280511	0.00192892	0.0349376	+	0	22.636	37	4	4	3	4	153	17	6.8	17.26	9.62144	9.86784	9.52303	9.80984	9.58394	9.9092	9.53546	9.92295	9.49352	9.65012	REACTOME_CLATHRIN_MEDIATED_ENDOCYTOSIS|REACTOME_DEVELOPMENTAL_BIOLOGY|REACTOME_DISEASE|REACTOME_EPH_EPHRIN_SIGNALING|REACTOME_EPHB_MEDIATED_FORWARD_SIGNALING|REACTOME_FCGAMMA_RECEPTOR_FCGR_DEPENDENT_PHAGOCYTOSIS|REACTOME_INFECTIOUS_DISEASE|REACTOME_INNATE_IMMUNE_SYSTEM|REACTOME_LEISHMANIA_INFECTION|REACTOME_MEMBRANE_TRAFFICKING|REACTOME_NERVOUS_SYSTEM_DEVELOPMENT|REACTOME_NEUTROPHIL_DEGRANULATION…
Q99LC8	Translation initiation factor eIF-2B subunit alpha OS=Mus musculus OX=10090 GN=Eif2b1 PE=1 SV=1	Eif2b1	0.279642	0.00013149	0.0146375	+	0	16.345	10	3	4	0	3	305	33.8	8.32	12.28	8.63789	8.92804	8.55912	8.89627	8.80629	9.0401	8.77177	9.0114	8.67369	8.97118	REACTOME_EUKARYOTIC_TRANSLATION_INITIATION|REACTOME_RECYCLING_OF_EIF2_GDP|REACTOME_TRANSLATION
Q9WU28	Prefoldin subunit 5 OS=Mus musculus OX=10090 GN=Pfdn5 PE=1 SV=1	Pfdn5	0.277239	0.004786	0.049528	+	0	38.592	50	7	12	1	7	154	17.3	6.33	39.84	11.185	11.4822	11.2634	11.4312	11.0746	11.4224	11.099	11.5089	11.0828	11.2463	REACTOME_COOPERATION_OF_PREFOLDIN_AND_TRIC_CCT_IN_ACTIN_AND_TUBULIN_FOLDING|REACTOME_PROTEIN_FOLDING
Q8BFS6	Serine/threonine-protein phosphatase CPPED1 OS=Mus musculus OX=10090 GN=Cpped1 PE=1 SV=1	Cpped1	0.276736	0.00056889	0.0236206	+	0	26.719	20	5	7	0	5	312	35.2	5.34	28.65	9.9249	10.2574	10.0429	10.2321	10.0582	10.3089	10.0748	10.3466	10.0023	10.3418	REACTOME_INNATE_IMMUNE_SYSTEM|REACTOME_NEUTROPHIL_DEGRANULATION
Q9JIK9	28S ribosomal protein S34, mitochondrial OS=Mus musculus OX=10090 GN=Mrps34 PE=1 SV=1	Mrps34	0.276174	0.00188555	0.0348785	+	0	27.98	31	6	11	6	6	218	25.8	10.43	33.33	10.7045	11.121	10.8373	11.0762	10.8654	11.1281	10.9526	11.1424	10.6964	10.9694	REACTOME_MITOCHONDRIAL_TRANSLATION|REACTOME_TRANSLATION
Q61749	Translation initiation factor eIF-2B subunit delta OS=Mus musculus OX=10090 GN=Eif2b4 PE=1 SV=2	Eif2b4	0.27609	0.00139481	0.0321997	+	0	21.81	14	5	6	0	5	524	57.6	9.25	19.44	8.6539	8.94049	8.75932	9.05529	8.91932	9.11305	8.79289	9.18397	8.88142	9.0945	REACTOME_EUKARYOTIC_TRANSLATION_INITIATION|REACTOME_RECYCLING_OF_EIF2_GDP|REACTOME_TRANSLATION
Q9D081	UDP-N-acetylglucosamine transferase subunit ALG14 homolog OS=Mus musculus OX=10090 GN=Alg14 PE=1 SV=1	Alg14	0.273473	0.00297488	0.0398425	+	0.005	2.861	4	1	2	0	1	217	24.4	9.48	5.07	7.09342	7.30664	7.102	7.4011	7.25772	7.50487	7.12636	7.30963	7.09756	7.52218	REACTOME_ASPARAGINE_N_LINKED_GLYCOSYLATION|REACTOME_BIOSYNTHESIS_OF_THE_N_GLYCAN_PRECURSOR_DOLICHOL_LIPID_LINKED_OLIGOSACCHARIDE_LLO_AND_TRANSFER_TO_A_NASCENT_PROTEIN|REACTOME_DISEASE|REACTOME_DISEASES_ASSOCIATED_WITH_N_GLYCOSYLATION_OF_PROTEINS|REACTOME_DISEASES_OF_GLYCOSYLATION|REACTOME_DISEASES_OF_METABOLISM|REACTOME_POST_TRANSLATIONAL_PROTEIN_MODIFICATION
Q8BMK1	tRNA N(3)-methylcytidine methyltransferase METTL2 OS=Mus musculus OX=10090 GN=Mettl2 PE=1 SV=2	Mettl2	0.273409	0.00244548	0.0378889	+	0.004	3.086	2	1	1	1	1	389	43.9	6.2	3.22	7.67989	7.82611	7.56039	7.83973	7.64948	8.02102	7.54735	7.88817	7.61716	7.84628	NA
G3X9M0	Isoform of Q9ER88, 28S ribosomal protein S29, mitochondrial OS=Mus musculus OX=10090 GN=Dap3 PE=1 SV=1	Dap3	0.272829	0.00131817	0.0319589	+	0	30.994	16	5	6	0	5	396	45.3	9.11	26.12	9.95963	10.3293	9.94761	10.2387	10.0944	10.2665	10.1402	10.3655	9.95628	10.2622	REACTOME_MITOCHONDRIAL_TRANSLATION|REACTOME_TRANSLATION
Q9ESW4	Acylglycerol kinase, mitochondrial OS=Mus musculus OX=10090 GN=Agk PE=1 SV=1	Agk	0.271747	0.00424118	0.0467997	+	0	24.424	16	6	7	5	6	421	46.9	8.4	23.38	9.61849	10.0427	9.75964	9.90884	9.80586	10.0732	9.85342	10.0653	9.61472	9.92081	REACTOME_DISEASE|REACTOME_DISEASES_OF_SIGNAL_TRANSDUCTION_BY_GROWTH_FACTOR_RECEPTORS_AND_SECOND_MESSENGERS|REACTOME_GLYCEROPHOSPHOLIPID_BIOSYNTHESIS|REACTOME_METABOLISM_OF_LIPIDS|REACTOME_ONCOGENIC_MAPK_SIGNALING|REACTOME_PHOSPHOLIPID_METABOLISM|REACTOME_SIGNALING_BY_BRAF_AND_RAF_FUSIONS
A0A0R4J250	Isoform of Q61070, Etoposide-induced protein 2.4 OS=Mus musculus OX=10090 GN=Ei24 PE=1 SV=1	Ei24	0.264156	0.0010403	0.028996	+	0.001	6.263	5	2	3	0	2	358	40.8	9.55	6.46	8.18237	8.49363	8.2381	8.5445	8.40714	8.62012	8.28763	8.45568	8.30995	8.63206	NA
P70671	Interferon regulatory factor 3 OS=Mus musculus OX=10090 GN=Irf3 PE=1 SV=1	Irf3	0.263821	0.00359687	0.0433839	+	0	12.97	7	2	2	0	2	419	46.8	5.43	10.44	8.51269	8.73053	8.49415	8.69695	8.44634	8.83646	8.56	8.72723	8.54763	8.88874	REACTOME_ACTIVATION_OF_IRF3_IRF7_MEDIATED_BY_TBK1_IKK_EPSILON|REACTOME_ANTIVIRAL_MECHANISM_BY_IFN_STIMULATED_GENES|REACTOME_CYTOKINE_SIGNALING_IN_IMMUNE_SYSTEM|REACTOME_CYTOSOLIC_SENSORS_OF_PATHOGEN_ASSOCIATED_DNA_|REACTOME_DDX58_IFIH1_MEDIATED_INDUCTION_OF_INTERFERON_ALPHA_BETA|REACTOME_INNATE_IMMUNE_SYSTEM|REACTOME_INTERFERON_ALPHA_BETA_SIGNALING|REACTOME_INTERFERON_GAMMA_SIGNALING|REACTOME_INT…
Q9D8X2	Coiled-coil domain-containing protein 124 OS=Mus musculus OX=10090 GN=Ccdc124 PE=1 SV=1	Ccdc124	0.261622	0.00308339	0.0406138	+	0	31.104	36	8	10	7	8	217	25.3	9.64	35.69	10.1214	10.4297	10.2207	10.5958	10.3787	10.5062	10.3449	10.6018	10.3279	10.5681	NA
A0A5F8MPG7	Isoform of Q60675, Laminin subunit alpha-2 (Fragment) OS=Mus musculus OX=10090 GN=Lama2 PE=1 SV=1	Lama2	0.261149	0.00263469	0.038921	+	0	11.726	8	2	3	2	2	256	27.5	7.37	8.31	7.31449	7.5382	7.48189	7.78731	7.7745	7.90038	7.55795	7.86317	7.49505	7.84056	REACTOME_ANCHORING_FIBRIL_FORMATION|REACTOME_ASSEMBLY_OF_COLLAGEN_FIBRILS_AND_OTHER_MULTIMERIC_STRUCTURES|REACTOME_CELL_CELL_COMMUNICATION|REACTOME_CELL_JUNCTION_ORGANIZATION|REACTOME_COLLAGEN_FORMATION|REACTOME_CYTOKINE_SIGNALING_IN_IMMUNE_SYSTEM|REACTOME_DEGRADATION_OF_THE_EXTRACELLULAR_MATRIX|REACTOME_DEVELOPMENTAL_BIOLOGY|REACTOME_ECM_PROTEOGLYCANS|REACTOME_EGR2_AND_SOX10_MEDIATED_INITIATION_…
Q99LS3	Phosphoserine phosphatase OS=Mus musculus OX=10090 GN=Psph PE=1 SV=1	Psph	0.260244	6.25105e-06	0.00576057	+	0	14.267	10	2	5	1	2	225	25.1	6.14	17.2	9.77754	10.0416	9.85346	10.1119	9.98797	10.2412	9.91601	10.2043	9.93141	10.1686	REACTOME_METABOLISM_OF_AMINO_ACIDS_AND_DERIVATIVES|REACTOME_SERINE_BIOSYNTHESIS
Q920E5	Farnesyl pyrophosphate synthase OS=Mus musculus OX=10090 GN=Fdps PE=1 SV=1	Fdps	0.259334	0.00410182	0.0463435	+	0	38.745	25	8	13	0	8	353	40.6	5.66	42.13	11.1833	11.5829	11.2215	11.5147	11.1682	11.4245	11.2691	11.4041	11.1573	11.3698	REACTOME_ACTIVATION_OF_GENE_EXPRESSION_BY_SREBF_SREBP_|REACTOME_CHOLESTEROL_BIOSYNTHESIS|REACTOME_METABOLISM_OF_LIPIDS|REACTOME_METABOLISM_OF_STEROIDS|REACTOME_REGULATION_OF_CHOLESTEROL_BIOSYNTHESIS_BY_SREBP_SREBF_
O35969	Guanidinoacetate N-methyltransferase OS=Mus musculus OX=10090 GN=Gamt PE=1 SV=1	Gamt	0.257255	0.00450975	0.0481883	+	0	43.794	48	7	14	0	7	236	26.3	5.71	52.16	10.6043	10.9819	10.6881	10.8881	10.9062	11.0316	10.879	11.136	10.7729	11.0992	REACTOME_CREATINE_METABOLISM|REACTOME_METABOLISM_OF_AMINO_ACIDS_AND_DERIVATIVES|REACTOME_RNA_POLYMERASE_II_TRANSCRIPTION|REACTOME_TRANSCRIPTIONAL_REGULATION_BY_MECP2
Q9JIY5	Serine protease HTRA2, mitochondrial OS=Mus musculus OX=10090 GN=Htra2 PE=1 SV=2	Htra2	0.256984	0.000682248	0.0245817	+	0	30.33	14	5	5	0	5	458	49.3	9.6	21.47	9.37065	9.73389	9.3796	9.59119	9.51475	9.74929	9.52319	9.76306	9.36867	9.60436	NA
Q9D880	Mitochondrial import inner membrane translocase subunit TIM50 OS=Mus musculus OX=10090 GN=Timm50 PE=1 SV=1	Timm50	0.255898	0.00235673	0.0377396	+	0	28.245	17	4	8	4	4	353	39.8	8.13	20.16	9.19224	9.43877	9.31485	9.5109	9.4395	9.66351	9.50283	9.71445	9.21252	9.6138	REACTOME_MITOCHONDRIAL_PROTEIN_IMPORT|REACTOME_PROTEIN_LOCALIZATION
P53569	CCAAT/enhancer-binding protein zeta OS=Mus musculus OX=10090 GN=Cebpz PE=1 SV=2	Cebpz	0.255441	0.000527211	0.0227394	+	0.003	3.611	1	1	2	0	1	1052	120.2	5.74	2.78	6.04202	6.30327	6.4022	6.61373	6.58	6.78333	6.68879	6.94529	6.46698	6.81158	NA
Q31125	Zinc transporter SLC39A7 OS=Mus musculus OX=10090 GN=Slc39a7 PE=1 SV=2	Slc39a7	0.25451	0.000286767	0.0182205	+	0	11.225	6	3	4	2	3	476	50.6	6.87	12.42	9.56484	9.8334	9.5714	9.78064	9.38284	9.71307	9.45687	9.69903	9.45122	9.67357	REACTOME_METAL_ION_SLC_TRANSPORTERS|REACTOME_SLC_MEDIATED_TRANSMEMBRANE_TRANSPORT|REACTOME_TRANSPORT_OF_BILE_SALTS_AND_ORGANIC_ACIDS_METAL_IONS_AND_AMINE_COMPOUNDS|REACTOME_TRANSPORT_OF_SMALL_MOLECULES|REACTOME_ZINC_INFLUX_INTO_CELLS_BY_THE_SLC39_GENE_FAMILY|REACTOME_ZINC_TRANSPORTERS
Q9CQF7	Isoform of Q9CWM4, Prefoldin 1 OS=Mus musculus OX=10090 GN=Pfdn1 PE=1 SV=1	Pfdn1	0.254212	0.000203406	0.0166017	+	0	29.569	49	5	8	0	5	122	14.2	6.81	31.77	10.6221	10.9508	10.6674	10.8952	10.6529	10.8824	10.6859	10.9451	10.6395	10.8655	REACTOME_COOPERATION_OF_PREFOLDIN_AND_TRIC_CCT_IN_ACTIN_AND_TUBULIN_FOLDING|REACTOME_PROTEIN_FOLDING
P62313	U6 snRNA-associated Sm-like protein LSm6 OS=Mus musculus OX=10090 GN=Lsm6 PE=1 SV=1	Lsm6	0.251805	0.00103024	0.028996	+	0	11.161	45	4	5	4	4	80	9.1	9.58	13.43	10.0126	10.1718	10.0115	10.2534	9.99283	10.2839	9.97022	10.3044	9.90741	10.1401	REACTOME_DEADENYLATION_DEPENDENT_MRNA_DECAY|REACTOME_METABOLISM_OF_RNA|REACTOME_MRNA_DECAY_BY_5_TO_3_EXORIBONUCLEASE|REACTOME_MRNA_SPLICING|REACTOME_PROCESSING_OF_CAPPED_INTRON_CONTAINING_PRE_MRNA
Q8VC85	U6 snRNA-associated Sm-like protein LSm1 OS=Mus musculus OX=10090 GN=Lsm1 PE=1 SV=1	Lsm1	0.247324	0.000146869	0.0146375	+	0.001	7.956	12	1	1	1	1	133	15.2	5.38	6.38	5.84751	6.16021	6.05608	6.29771	6.21143	6.42767	6.00217	6.25058	5.89628	6.11393	REACTOME_DEADENYLATION_DEPENDENT_MRNA_DECAY|REACTOME_METABOLISM_OF_RNA|REACTOME_MRNA_DECAY_BY_5_TO_3_EXORIBONUCLEASE
Q3UHD6	Sorting nexin-27 OS=Mus musculus OX=10090 GN=Snx27 PE=1 SV=2	Snx27	0.246666	0.00145552	0.0326396	+	0	14.739	7	4	4	0	4	539	61	6.4	12.33	9.97487	10.3131	9.97404	10.1476	10.0371	10.3011	9.99812	10.2784	9.98988	10.1671	NA
A0A3Q4EC24	Isoform of Q791T5, Mitochondrial carrier homolog 1 (Fragment) OS=Mus musculus OX=10090 GN=Mtch1 PE=1 SV=1	Mtch1	0.246024	0.00223359	0.0373564	+	0	17.41	17	4	4	0	4	299	33.1	9.22	12.98	8.85984	9.12822	9.05944	9.2924	9.1855	9.31599	9.04146	9.28917	8.93844	9.28902	NA
B2KGA7	Isoform of Q505B7, Protein archease OS=Mus musculus OX=10090 GN=Zbtb8os PE=1 SV=1	Zbtb8os	0.24586	0.0017985	0.0348785	+	0.001	6.068	10	2	3	0	2	167	19.6	4.56	3.92	8.63301	8.76021	8.52042	8.84539	8.64309	8.89391	8.56801	8.85611	8.63313	8.87133	REACTOME_METABOLISM_OF_RNA|REACTOME_TRNA_PROCESSING|REACTOME_TRNA_PROCESSING_IN_THE_NUCLEUS
O08582	GTP-binding protein 1 OS=Mus musculus OX=10090 GN=Gtpbp1 PE=1 SV=2	Gtpbp1	0.2438	0.00401661	0.0455942	+	0	19.077	12	4	5	2	4	668	72.3	8.29	17.46	9.24135	9.42238	9.16675	9.2957	9.28115	9.52101	9.17742	9.50943	9.18729	9.52443	NA
Q3UQ84	Threonine--tRNA ligase, mitochondrial OS=Mus musculus OX=10090 GN=Tars2 PE=1 SV=1	Tars2	0.243132	0.00243614	0.0378889	+	0	22.977	12	7	9	0	7	723	81.6	7.87	27.58	9.85662	10.218	9.95121	10.1972	10.1579	10.3274	10.132	10.3015	9.99667	10.266	REACTOME_CYTOSOLIC_TRNA_AMINOACYLATION|REACTOME_MITOCHONDRIAL_TRNA_AMINOACYLATION|REACTOME_TRANSLATION|REACTOME_TRNA_AMINOACYLATION
Q91WB7	Ubiquitin domain-containing protein 1 OS=Mus musculus OX=10090 GN=Ubtd1 PE=2 SV=1	Ubtd1	0.241605	0.000134225	0.0146375	+	0	13.477	15	3	3	2	3	227	26	7.83	11.3	9.42684	9.71372	9.48933	9.70268	9.4102	9.68676	9.43704	9.66243	9.43684	9.6427	NA
Q07079	Insulin-like growth factor-binding protein 5 OS=Mus musculus OX=10090 GN=Igfbp5 PE=1 SV=1	Igfbp5	0.241352	0.00423984	0.0467997	+	0.001	4.511	4	1	1	1	1	271	30.4	8.12	4.1	7.53061	7.64307	7.39207	7.57806	7.3105	7.56885	7.45589	7.77926	7.55861	7.88519	REACTOME_POST_TRANSLATIONAL_PROTEIN_MODIFICATION|REACTOME_REGULATION_OF_INSULIN_LIKE_GROWTH_FACTOR_IGF_TRANSPORT_AND_UPTAKE_BY_INSULIN_LIKE_GROWTH_FACTOR_BINDING_PROTEINS_IGFBPS_|REACTOME_RNA_POLYMERASE_II_TRANSCRIPTION|REACTOME_TP53_REGULATES_TRANSCRIPTION_OF_CELL_DEATH_GENES|REACTOME_TP53_REGULATES_TRANSCRIPTION_OF_DEATH_RECEPTORS_AND_LIGANDS|REACTOME_TRANSCRIPTIONAL_REGULATION_BY_TP53
Q8CCM6	Mitochondrial import inner membrane translocase subunit Tim21 OS=Mus musculus OX=10090 GN=Timm21 PE=1 SV=2	Timm21	0.241131	0.0027194	0.0393675	+	0	21.393	21	4	8	3	4	244	27.9	9.95	27.79	9.49572	9.77088	9.59682	9.88446	9.82228	9.98716	9.80371	9.94918	9.50606	9.83857	REACTOME_MITOCHONDRIAL_PROTEIN_IMPORT|REACTOME_PROTEIN_LOCALIZATION
Q3UWL8	Prefoldin subunit 4 OS=Mus musculus OX=10090 GN=Pfdn4 PE=1 SV=1	Pfdn4	0.240612	0.000518131	0.0226788	+	0.001	5.237	16	2	3	0	2	134	15.2	4.61	7.41	8.18861	8.40385	8.13071	8.44403	8.21692	8.4485	8.05549	8.32362	8.09716	8.27193	REACTOME_COOPERATION_OF_PREFOLDIN_AND_TRIC_CCT_IN_ACTIN_AND_TUBULIN_FOLDING|REACTOME_PROTEIN_FOLDING
Q8BUV8	Protein GPR107 OS=Mus musculus OX=10090 GN=Gpr107 PE=1 SV=2	Gpr107	0.238551	0.0041933	0.0467513	+	0.001	9.581	5	3	4	3	3	551	62	7.59	9.04	9.11881	9.49404	9.23645	9.35802	9.19236	9.44092	9.20161	9.4311	9.08061	9.29852	NA
Q8R2Y2	Cell surface glycoprotein MUC18 OS=Mus musculus OX=10090 GN=Mcam PE=1 SV=1	Mcam	0.23632	0.00326168	0.0414983	+	0.001	7.789	2	2	4	0	2	648	71.5	5.83	9.93	9.32474	9.45784	9.35544	9.53392	9.32129	9.60259	9.37102	9.71764	9.51293	9.75503	NA
Q9D7M1	Glucose-induced degradation protein 8 homolog OS=Mus musculus OX=10090 GN=Gid8 PE=1 SV=1	Gid8	0.23569	0.00140561	0.0321997	+	0	16.363	22	3	3	3	3	228	26.8	4.97	12.3	8.5803	8.88181	8.58906	8.90192	8.67542	8.84739	8.69516	8.90578	8.6386	8.82008	NA
G5E870	E3 ubiquitin-protein ligase TRIP12 OS=Mus musculus OX=10090 GN=Trip12 PE=1 SV=1	Trip12	0.234131	0.00425308	0.0467997	+	0	55.64	7	10	12	0	10	2025	224	8.35	46.15	10.3786	10.7386	10.4073	10.6842	10.3987	10.6051	10.4131	10.6193	10.4461	10.5672	REACTOME_ADAPTIVE_IMMUNE_SYSTEM|REACTOME_ANTIGEN_PROCESSING_UBIQUITINATION_PROTEASOME_DEGRADATION|REACTOME_CLASS_I_MHC_MEDIATED_ANTIGEN_PROCESSING_PRESENTATION
Q9CW46	Ribonucleoprotein PTB-binding 1 OS=Mus musculus OX=10090 GN=Raver1 PE=1 SV=2	Raver1	0.225417	0.00360155	0.0433839	+	0	19.468	14	4	4	0	4	748	79.3	8.72	16.02	8.7131	8.87443	8.66762	8.90325	8.71804	9.05132	8.6509	8.91931	8.85744	8.98588	NA
Q99MJ9	ATP-dependent RNA helicase DDX50 OS=Mus musculus OX=10090 GN=Ddx50 PE=2 SV=1	Ddx50	0.224103	1.14354e-05	0.00598481	+	0.004	3.062	1	1	1	1	1	734	82.1	9.25	2.89	8.14308	8.37593	8.17927	8.42023	8.05475	8.28941	8.03588	8.25347	8.05526	8.24972	REACTOME_B_WICH_COMPLEX_POSITIVELY_REGULATES_RRNA_EXPRESSION|REACTOME_EPIGENETIC_REGULATION_OF_GENE_EXPRESSION|REACTOME_METABOLISM_OF_RNA|REACTOME_POSITIVE_EPIGENETIC_REGULATION_OF_RRNA_EXPRESSION|REACTOME_RRNA_PROCESSING
P60521	Gamma-aminobutyric acid receptor-associated protein-like 2 OS=Mus musculus OX=10090 GN=Gabarapl2 PE=1 SV=1	Gabarapl2	0.223253	0.00163381	0.0343105	+	0	12.208	25	3	5	3	3	117	13.7	8.1	16.27	9.86139	10.0973	9.84791	10.1638	9.88298	10.1267	9.78747	9.96095	9.85124	9.99854	REACTOME_AUTOPHAGY|REACTOME_MEMBRANE_TRAFFICKING|REACTOME_RAB_REGULATION_OF_TRAFFICKING|REACTOME_TBC_RABGAPS|REACTOME_VESICLE_MEDIATED_TRANSPORT
Q8R5A6	TBC1 domain family member 22A OS=Mus musculus OX=10090 GN=Tbc1d22a PE=1 SV=3	Tbc1d22a	0.222901	0.00172475	0.0347358	+	0	10.447	7	2	2	1	2	516	59.3	6.46	10.01	8.7483	9.06463	8.86156	9.06215	8.88858	9.04385	8.88168	9.05787	8.70609	8.97221	NA
Q9CPX6	Ubiquitin-like-conjugating enzyme ATG3 OS=Mus musculus OX=10090 GN=Atg3 PE=1 SV=1	Atg3	0.222269	0.00234532	0.0377396	+	0	24.036	29	6	6	6	6	314	35.8	4.72	20.07	9.72841	10.0343	9.86221	9.97551	9.84207	10.041	9.75644	10.0155	9.77127	10.0055	REACTOME_AUTOPHAGY
Q99JZ4	Isoform of P36536, GTP-binding protein SAR1a OS=Mus musculus OX=10090 GN=Sar1a PE=1 SV=1	Sar1a	0.221073	0.000239927	0.0176993	+	0	56.83	56	9	26	1	5	198	22.4	6.68	95.27	9.85986	10.1099	9.91612	10.0974	9.98042	10.185	10.0415	10.2358	9.90871	10.1837	NA
B1ASK8	Isoform of Q6P073, Ubiquitin-conjugating enzyme E2 J2 OS=Mus musculus OX=10090 GN=Ube2j2 PE=1 SV=1	Ube2j2	0.220703	0.000318593	0.0192769	+	0.001	9.555	14	2	2	0	2	271	30.3	8.94	8.25	7.88333	8.14545	7.87755	8.09831	7.95185	8.105	7.91239	8.12803	7.79808	8.04993	REACTOME_ADAPTIVE_IMMUNE_SYSTEM|REACTOME_ANTIGEN_PROCESSING_UBIQUITINATION_PROTEASOME_DEGRADATION|REACTOME_CLASS_I_MHC_MEDIATED_ANTIGEN_PROCESSING_PRESENTATION|REACTOME_E3_UBIQUITIN_LIGASES_UBIQUITINATE_TARGET_PROTEINS|REACTOME_INSERTION_OF_TAIL_ANCHORED_PROTEINS_INTO_THE_ENDOPLASMIC_RETICULUM_MEMBRANE|REACTOME_POST_TRANSLATIONAL_PROTEIN_MODIFICATION|REACTOME_PROTEIN_LOCALIZATION|REACTOME_PROTEIN…
G3X8T9	Isoform of Q91WP6, Serine protease inhibitor A3N OS=Mus musculus OX=10090 GN=Serpina3n PE=1 SV=1	Serpina3n	0.219983	0.00190276	0.0348785	+	0	11.712	10	3	5	0	2	418	46.7	5.82	10.73	7.06629	7.21366	6.88223	7.10756	7.24833	7.41379	7.14976	7.39439	7.09306	7.41018	REACTOME_HEMOSTASIS|REACTOME_INNATE_IMMUNE_SYSTEM|REACTOME_NEUTROPHIL_DEGRANULATION|REACTOME_PLATELET_ACTIVATION_SIGNALING_AND_AGGREGATION|REACTOME_RESPONSE_TO_ELEVATED_PLATELET_CYTOSOLIC_CA2_
D3YYK8	Isoform of Q8R001, Microtubule-associated protein RP/EB family member 2 (Fragment) OS=Mus musculus OX=10090 GN=Mapre2 PE=1 SV=1	Mapre2	0.215827	0.00173184	0.0347358	+	0	33.771	37	8	15	0	6	260	29.4	6.44	48.94	9.23077	9.50847	9.26569	9.49039	9.40349	9.57826	9.35781	9.48552	9.14102	9.41529	NA
P21126	Ubiquitin-like protein 4A OS=Mus musculus OX=10090 GN=Ubl4a PE=1 SV=1	Ubl4a	0.214236	0.00128638	0.0319589	+	0	12.711	14	2	3	2	2	157	17.8	8.44	8.65	9.23322	9.46634	9.20758	9.39451	9.09922	9.39581	9.11224	9.3314	9.16706	9.30243	REACTOME_INSERTION_OF_TAIL_ANCHORED_PROTEINS_INTO_THE_ENDOPLASMIC_RETICULUM_MEMBRANE|REACTOME_PROTEIN_LOCALIZATION
Q8K268	ATP-binding cassette sub-family F member 3 OS=Mus musculus OX=10090 GN=Abcf3 PE=1 SV=1	Abcf3	0.213653	0.00230161	0.037548	+	0	11.732	5	3	3	0	3	709	79.8	6.16	9.24	9.11792	9.30974	9.04602	9.36771	9.27693	9.41055	9.18035	9.37434	9.1961	9.42324	NA
Q8C5N9	Isoform of O88736, 3-keto-steroid reductase OS=Mus musculus OX=10090 GN=Hsd17b7 PE=1 SV=1	Hsd17b7	0.211382	0.00275137	0.039639	+	0	10.97	7	2	2	0	2	362	40	7.03	7.84	8.34561	8.54438	8.29826	8.50278	8.55095	8.68645	8.55239	8.74043	8.5393	8.86938	REACTOME_CHOLESTEROL_BIOSYNTHESIS|REACTOME_METABOLISM_OF_LIPIDS|REACTOME_METABOLISM_OF_STEROIDS
Q3U0M1	Trafficking protein particle complex subunit 9 OS=Mus musculus OX=10090 GN=Trappc9 PE=1 SV=2	Trappc9	0.21033	7.78391e-06	0.00576057	+	0	21.509	5	4	5	0	4	1148	128.2	6.47	17.26	8.78905	9.00976	8.82995	9.03724	9.00994	9.19395	8.91821	9.14134	8.8436	9.0601	REACTOME_ASPARAGINE_N_LINKED_GLYCOSYLATION|REACTOME_COPII_MEDIATED_VESICLE_TRANSPORT|REACTOME_ER_TO_GOLGI_ANTEROGRADE_TRANSPORT|REACTOME_MEMBRANE_TRAFFICKING|REACTOME_POST_TRANSLATIONAL_PROTEIN_MODIFICATION|REACTOME_RAB_GEFS_EXCHANGE_GTP_FOR_GDP_ON_RABS|REACTOME_RAB_REGULATION_OF_TRAFFICKING|REACTOME_TRANSPORT_TO_THE_GOLGI_AND_SUBSEQUENT_MODIFICATION|REACTOME_VESICLE_MEDIATED_TRANSPORT
Q9D1L9	Ragulator complex protein LAMTOR5 OS=Mus musculus OX=10090 GN=Lamtor5 PE=1 SV=1	Lamtor5	0.20844	0.000607863	0.0237047	+	0	22.783	33	2	9	0	2	91	9.6	4.87	35.9	10.7264	10.9095	10.512	10.7869	10.5613	10.7672	10.5282	10.7575	10.4822	10.6311	REACTOME_AMINO_ACIDS_REGULATE_MTORC1|REACTOME_AUTOPHAGY|REACTOME_CELLULAR_RESPONSES_TO_EXTERNAL_STIMULI|REACTOME_ENERGY_DEPENDENT_REGULATION_OF_MTOR_BY_LKB1_AMPK|REACTOME_INTRACELLULAR_SIGNALING_BY_SECOND_MESSENGERS|REACTOME_MTOR_SIGNALLING|REACTOME_MTORC1_MEDIATED_SIGNALLING|REACTOME_PTEN_REGULATION|REACTOME_REGULATION_OF_PTEN_GENE_TRANSCRIPTION|REACTOME_RNA_POLYMERASE_II_TRANSCRIPTION|REACTOME_…
Q8BYK6	YTH domain-containing family protein 3 OS=Mus musculus OX=10090 GN=Ythdf3 PE=1 SV=2	Ythdf3	0.208304	0.00103914	0.028996	+	0	25.041	11	6	7	0	3	585	63.9	9.04	20.39	9.87904	10.0414	9.691	9.97631	9.77554	9.9249	9.73425	9.95191	9.73308	9.95988	NA
Q6PGF7	Exocyst complex component 8 OS=Mus musculus OX=10090 GN=Exoc8 PE=1 SV=1	Exoc8	0.203927	0.00339888	0.0423455	+	0.001	8.447	3	2	2	2	2	716	81	5.4	7.87	8.73693	8.84831	8.71522	8.87984	8.7479	8.94593	8.6225	8.86482	8.60265	8.90594	REACTOME_CARGO_TRAFFICKING_TO_THE_PERICILIARY_MEMBRANE|REACTOME_CILIUM_ASSEMBLY|REACTOME_INSULIN_PROCESSING|REACTOME_MEMBRANE_TRAFFICKING|REACTOME_ORGANELLE_BIOGENESIS_AND_MAINTENANCE|REACTOME_PEPTIDE_HORMONE_METABOLISM|REACTOME_TRANSLOCATION_OF_SLC2A4_GLUT4_TO_THE_PLASMA_MEMBRANE|REACTOME_VESICLE_MEDIATED_TRANSPORT|REACTOME_VXPX_CARGO_TARGETING_TO_CILIUM
A2AKV6	Isoform of Q8K1E6, Alpha-ketoglutarate-dependent dioxygenase alkB homolog 3 OS=Mus musculus OX=10090 GN=Alkbh3 PE=1 SV=1	Alkbh3	0.203899	0.000450845	0.0214773	+	0	41.249	38	6	7	0	6	287	33.3	8.29	32.33	9.26292	9.48538	9.26523	9.50035	9.47524	9.71852	9.47619	9.65247	9.42277	9.56513	REACTOME_DNA_DAMAGE_REVERSAL|REACTOME_DNA_REPAIR
Q9ESX5	H/ACA ribonucleoprotein complex subunit DKC1 OS=Mus musculus OX=10090 GN=Dkc1 PE=1 SV=4	Dkc1	0.202183	0.00220463	0.0373564	+	0	24.995	14	5	6	3	5	509	57.4	9.28	24.88	9.77763	10.0442	9.83923	10.0938	9.92041	10.0354	9.92613	10.0835	9.93125	10.1487	REACTOME_CELL_CYCLE|REACTOME_CHROMOSOME_MAINTENANCE|REACTOME_EXTENSION_OF_TELOMERES|REACTOME_METABOLISM_OF_RNA|REACTOME_RRNA_MODIFICATION_IN_THE_NUCLEUS_AND_CYTOSOL|REACTOME_RRNA_PROCESSING|REACTOME_TELOMERE_EXTENSION_BY_TELOMERASE|REACTOME_TELOMERE_MAINTENANCE
A0A5F8MP92	Isoform of Q8R313, Exocyst complex component OS=Mus musculus OX=10090 GN=Exoc6 PE=1 SV=1	Exoc6	0.201559	0.00261812	0.0388989	+	0	11.847	5	4	5	0	3	811	94	6.05	13.56	9.88013	10.0988	9.87379	10.1373	9.97116	10.228	10.0663	10.1688	9.95327	10.1195	REACTOME_CARGO_TRAFFICKING_TO_THE_PERICILIARY_MEMBRANE|REACTOME_CILIUM_ASSEMBLY|REACTOME_INSULIN_PROCESSING|REACTOME_MEMBRANE_TRAFFICKING|REACTOME_ORGANELLE_BIOGENESIS_AND_MAINTENANCE|REACTOME_PEPTIDE_HORMONE_METABOLISM|REACTOME_TRANSLOCATION_OF_SLC2A4_GLUT4_TO_THE_PLASMA_MEMBRANE|REACTOME_VESICLE_MEDIATED_TRANSPORT|REACTOME_VXPX_CARGO_TARGETING_TO_CILIUM
P40338	von Hippel-Lindau disease tumor suppressor OS=Mus musculus OX=10090 GN=Vhl PE=1 SV=1	Vhl	0.197968	0.00283147	0.039639	+	0.001	4.829	5	1	3	1	1	181	20.8	6.11	7.31	7.4451	7.62644	7.41485	7.72183	7.56698	7.77224	7.43307	7.55704	7.44902	7.62131	REACTOME_ADAPTIVE_IMMUNE_SYSTEM|REACTOME_ANTIGEN_PROCESSING_UBIQUITINATION_PROTEASOME_DEGRADATION|REACTOME_CELLULAR_RESPONSE_TO_HYPOXIA|REACTOME_CELLULAR_RESPONSES_TO_EXTERNAL_STIMULI|REACTOME_CLASS_I_MHC_MEDIATED_ANTIGEN_PROCESSING_PRESENTATION|REACTOME_DISEASE|REACTOME_GENOME_REPLICATION_AND_TRANSCRIPTION|REACTOME_INFECTIOUS_DISEASE|REACTOME_NEDDYLATION|REACTOME_POST_TRANSLATIONAL_PROTEIN_MODIF…
O70194	Eukaryotic translation initiation factor 3 subunit D OS=Mus musculus OX=10090 GN=Eif3d PE=1 SV=2	Eif3d	0.196736	0.0023986	0.0378018	+	0	44.276	23	10	13	8	10	548	63.9	6.05	42.12	10.3585	10.6507	10.4083	10.5519	10.3326	10.5649	10.421	10.5919	10.3838	10.5284	REACTOME_ACTIVATION_OF_THE_MRNA_UPON_BINDING_OF_THE_CAP_BINDING_COMPLEX_AND_EIFS_AND_SUBSEQUENT_BINDING_TO_43S|REACTOME_EUKARYOTIC_TRANSLATION_INITIATION|REACTOME_TRANSLATION
P58158	Galactosylgalactosylxylosylprotein 3-beta-glucuronosyltransferase 3 OS=Mus musculus OX=10090 GN=B3gat3 PE=1 SV=1	B3gat3	0.194543	0.00251026	0.0384	+	0.001	7.763	6	2	2	2	2	335	37	8.78	7.62	8.44491	8.55752	8.31806	8.57595	8.35441	8.61709	8.34142	8.51373	8.37029	8.53752	REACTOME_A_TETRASACCHARIDE_LINKER_SEQUENCE_IS_REQUIRED_FOR_GAG_SYNTHESIS|REACTOME_CHONDROITIN_SULFATE_DERMATAN_SULFATE_METABOLISM|REACTOME_DISEASE|REACTOME_DISEASES_ASSOCIATED_WITH_GLYCOSAMINOGLYCAN_METABOLISM|REACTOME_DISEASES_OF_GLYCOSYLATION|REACTOME_DISEASES_OF_METABOLISM|REACTOME_GLYCOSAMINOGLYCAN_METABOLISM|REACTOME_HEPARAN_SULFATE_HEPARIN_HS_GAG_METABOLISM|REACTOME_METABOLISM_OF_CARBOHYDRA…
Q3UVL4	Vacuolar protein sorting-associated protein 51 homolog OS=Mus musculus OX=10090 GN=Vps51 PE=1 SV=2	Vps51	0.193617	0.00226871	0.0373564	+	0.001	7.967	3	2	2	0	2	782	86.1	6.24	6	8.1258	8.39692	8.16393	8.28643	8.11641	8.25378	8.00434	8.21536	7.96521	8.19129	REACTOME_INTRA_GOLGI_AND_RETROGRADE_GOLGI_TO_ER_TRAFFIC|REACTOME_MEMBRANE_TRAFFICKING|REACTOME_RETROGRADE_TRANSPORT_AT_THE_TRANS_GOLGI_NETWORK|REACTOME_VESICLE_MEDIATED_TRANSPORT
A0A338P6B4	Isoform of Q923G2, DNA-directed RNA polymerases I, II, and III subunit RPABC3 (Fragment) OS=Mus musculus OX=10090 GN=Polr2h PE=1 SV=1	Polr2h	0.193087	0.00395327	0.0453555	+	0	12.53	40	2	5	0	2	108	12.2	4.41	16.45	8.35114	8.53228	8.37718	8.48743	8.34835	8.65499	8.34194	8.50509	8.35283	8.55708	REACTOME_ABORTIVE_ELONGATION_OF_HIV_1_TRANSCRIPT_IN_THE_ABSENCE_OF_TAT|REACTOME_ACTIVATION_OF_ANTERIOR_HOX_GENES_IN_HINDBRAIN_DEVELOPMENT_DURING_EARLY_EMBRYOGENESIS|REACTOME_B_WICH_COMPLEX_POSITIVELY_REGULATES_RRNA_EXPRESSION|REACTOME_CELL_CYCLE|REACTOME_CHROMOSOME_MAINTENANCE|REACTOME_CYTOSOLIC_SENSORS_OF_PATHOGEN_ASSOCIATED_DNA_|REACTOME_DEVELOPMENTAL_BIOLOGY|REACTOME_DISEASE|REACTOME_DISEASES_…
G3X926	Isoform of Q9JJ80, Ribosome production factor 2 homolog OS=Mus musculus OX=10090 GN=Rpf2 PE=1 SV=1	Rpf2	0.19262	0.00165069	0.0343896	+	0	17.978	21	5	5	0	5	273	31.5	9.98	15.08	10.169	10.4307	10.1933	10.3878	10.3424	10.4589	10.3199	10.4802	10.1556	10.3857	NA
P51855	Glutathione synthetase OS=Mus musculus OX=10090 GN=Gss PE=1 SV=1	Gss	0.190908	0.00123516	0.0314594	+	0	28.654	15	7	8	0	7	474	52.2	5.8	27.21	10.8054	11.0822	10.9131	11.0499	11.0107	11.2017	11.0586	11.2429	10.9267	11.0923	REACTOME_BIOLOGICAL_OXIDATIONS|REACTOME_DISEASE|REACTOME_DISEASES_OF_METABOLISM|REACTOME_GLUTATHIONE_CONJUGATION|REACTOME_GLUTATHIONE_SYNTHESIS_AND_RECYCLING|REACTOME_METABOLIC_DISORDERS_OF_BIOLOGICAL_OXIDATION_ENZYMES|REACTOME_PHASE_II_CONJUGATION_OF_COMPOUNDS
P97765	WW domain-binding protein 2 OS=Mus musculus OX=10090 GN=Wbp2 PE=1 SV=1	Wbp2	0.190291	0.0036452	0.0435141	+	0	12.536	12	3	4	0	3	261	28	6.33	11.38	8.94388	9.07075	8.85788	8.99517	8.82472	9.12489	8.80391	9.01345	8.85374	9.03132	NA
Q3UVK0	Endoplasmic reticulum metallopeptidase 1 OS=Mus musculus OX=10090 GN=Ermp1 PE=1 SV=2	Ermp1	0.189829	0.000148876	0.0146375	+	0.001	8.578	3	2	3	1	2	898	100.1	7.49	11.78	9.30234	9.45531	9.2898	9.52072	9.44848	9.62618	9.34265	9.52185	9.36867	9.57703	NA
Q922H4	Mannose-1-phosphate guanyltransferase alpha OS=Mus musculus OX=10090 GN=Gmppa PE=1 SV=1	Gmppa	0.18799	0.000807192	0.0260639	+	0	18.765	11	4	5	2	4	420	46.2	7.62	16.65	9.15977	9.29119	9.21814	9.4049	9.25915	9.48263	9.27409	9.42955	9.14874	9.39158	REACTOME_ASPARAGINE_N_LINKED_GLYCOSYLATION|REACTOME_BIOSYNTHESIS_OF_THE_N_GLYCAN_PRECURSOR_DOLICHOL_LIPID_LINKED_OLIGOSACCHARIDE_LLO_AND_TRANSFER_TO_A_NASCENT_PROTEIN|REACTOME_POST_TRANSLATIONAL_PROTEIN_MODIFICATION|REACTOME_SYNTHESIS_OF_GDP_MANNOSE|REACTOME_SYNTHESIS_OF_SUBSTRATES_IN_N_GLYCAN_BIOSYTHESIS
Q8K3H0	DCC-interacting protein 13-alpha OS=Mus musculus OX=10090 GN=Appl1 PE=1 SV=1	Appl1	0.18277	0.00253005	0.0385311	+	0	43.462	16	8	10	8	8	707	79.3	5.41	34.26	9.60969	9.86204	9.6827	9.88174	9.83838	9.94321	9.81081	9.94773	9.63299	9.8537	REACTOME_CASPASE_ACTIVATION_VIA_DEPENDENCE_RECEPTORS_IN_THE_ABSENCE_OF_LIGAND|REACTOME_CASPASE_ACTIVATION_VIA_EXTRINSIC_APOPTOTIC_SIGNALLING_PATHWAY|REACTOME_PROGRAMMED_CELL_DEATH
Q9QY36	N-alpha-acetyltransferase 10 OS=Mus musculus OX=10090 GN=Naa10 PE=1 SV=1	Naa10	0.174052	0.0032037	0.0414983	+	0	27.445	32	6	8	0	6	235	26.5	5.64	25.46	10.5128	10.7564	10.6304	10.761	10.65	10.7736	10.6448	10.7781	10.5687	10.8079	NA
A0A1L1SVC7	Isoform of Q9CQ02, COMM domain-containing protein 4 (Fragment) OS=Mus musculus OX=10090 GN=Commd4 PE=1 SV=1	Commd4	0.171283	0.0034074	0.0423455	+	0	12.175	16	2	2	0	2	180	19.7	6.09	9.29	9.00503	9.12626	8.94724	9.09103	8.87589	9.13804	8.86942	9.07632	8.86481	8.98716	REACTOME_NEDDYLATION|REACTOME_POST_TRANSLATIONAL_PROTEIN_MODIFICATION
Q9CQ40	39S ribosomal protein L49, mitochondrial OS=Mus musculus OX=10090 GN=Mrpl49 PE=1 SV=1	Mrpl49	0.16985	0.00295744	0.0398425	+	0	22.405	35	6	8	4	6	166	19.1	9.5	21.6	10.4169	10.6092	10.5295	10.6192	10.6558	10.8225	10.6097	10.7598	10.4845	10.735	REACTOME_MITOCHONDRIAL_TRANSLATION|REACTOME_TRANSLATION
O89050	Muskelin OS=Mus musculus OX=10090 GN=Mkln1 PE=1 SV=1	Mkln1	0.165797	0.0029198	0.0398425	+	0	29.074	11	6	6	4	6	735	84.8	6.34	25.29	9.99864	10.2165	10.0836	10.2297	10.173	10.2929	10.1669	10.2771	10.1176	10.3526	NA
Q9D0W5	Peptidyl-prolyl cis-trans isomerase-like 1 OS=Mus musculus OX=10090 GN=Ppil1 PE=1 SV=1	Ppil1	0.143316	0.000503494	0.0223695	+	0.001	9.756	17	2	7	2	2	166	18.2	7.99	13.75	9.556	9.72861	9.64299	9.74414	9.60127	9.7286	9.68362	9.82443	9.6207	9.79538	REACTOME_METABOLISM_OF_RNA|REACTOME_MRNA_SPLICING|REACTOME_PROCESSING_OF_CAPPED_INTRON_CONTAINING_PRE_MRNA
F8WHJ1	Isoform of Q3U2I3, FHF complex subunit HOOK-interacting protein 1B OS=Mus musculus OX=10090 GN=Fhip1b PE=1 SV=1	Fhip1b	0.136824	0.00299183	0.0398805	+	0.023	1.668	2	1	1	0	1	909	99.1	6.44	0	6.00016	6.09332	5.82327	6.00406	6.30693	6.40398	5.92434	6.04329	6.00234	6.19651	NA
Q8C522	Endonuclease domain-containing 1 protein OS=Mus musculus OX=10090 GN=Endod1 PE=1 SV=2	Endod1	0.12649	0.00283888	0.039639	+	0	18.727	9	4	5	3	4	501	55.2	6.16	16.73	9.41882	9.59632	9.45483	9.6085	9.60068	9.66642	9.50871	9.63908	9.40673	9.5119	REACTOME_HEMOSTASIS|REACTOME_PLATELET_ACTIVATION_SIGNALING_AND_AGGREGATION|REACTOME_RESPONSE_TO_ELEVATED_PLATELET_CYTOSOLIC_CA2_
Q5DU37	Zinc finger FYVE domain-containing protein 26 OS=Mus musculus OX=10090 GN=Zfyve26 PE=1 SV=2	Zfyve26	0.126329	0.00173205	0.0347358	+	0	11.425	2	5	5	0	5	2529	282.8	6.21	13.91	8.8214	8.97422	8.80212	8.92465	8.9672	9.07301	8.98095	9.0582	8.78831	8.96155	NA
Q91YM2	Rho GTPase-activating protein 35 OS=Mus musculus OX=10090 GN=Arhgap35 PE=1 SV=3	Arhgap35	0.105216	0.000643644	0.0240715	+	0.001	6.323	2	3	3	3	3	1499	170.3	6.61	7.69	9.58683	9.69707	9.74029	9.81073	9.68988	9.78669	9.67798	9.78921	9.74135	9.87871	REACTOME_DEVELOPMENTAL_BIOLOGY|REACTOME_NERVOUS_SYSTEM_DEVELOPMENT|REACTOME_PTK6_REGULATES_RHO_GTPASES_RAS_GTPASE_AND_MAP_KINASES|REACTOME_RHO_GTPASE_CYCLE|REACTOME_SEMA4D_IN_SEMAPHORIN_SIGNALING|REACTOME_SEMA4D_MEDIATED_INHIBITION_OF_CELL_ATTACHMENT_AND_MIGRATION|REACTOME_SEMAPHORIN_INTERACTIONS|REACTOME_SIGNALING_BY_PTK6|REACTOME_SIGNALING_BY_RHO_GTPASES
Q60996	Serine/threonine-protein phosphatase 2A 56 kDa regulatory subunit gamma isoform OS=Mus musculus OX=10090 GN=Ppp2r5c PE=1 SV=2	Ppp2r5c	0.101733	0.00132738	0.0320142	+	0	21.721	11	6	10	0	3	524	60.8	6.64	26.55	9.69283	9.76546	9.5924	9.70556	9.66431	9.80963	9.59156	9.6767	9.59013	9.68255	REACTOME_ADAPTIVE_IMMUNE_SYSTEM|REACTOME_BETA_CATENIN_PHOSPHORYLATION_CASCADE|REACTOME_CELL_CYCLE|REACTOME_CELL_CYCLE_CHECKPOINTS|REACTOME_CELL_CYCLE_MITOTIC|REACTOME_COSTIMULATION_BY_THE_CD28_FAMILY|REACTOME_CTLA4_INHIBITORY_SIGNALING|REACTOME_CYTOKINE_SIGNALING_IN_IMMUNE_SYSTEM|REACTOME_DARPP_32_EVENTS|REACTOME_DEGRADATION_OF_BETA_CATENIN_BY_THE_DESTRUCTION_COMPLEX|REACTOME_DISASSEMBLY_OF_THE_D…
O35632	Hyaluronidase-2 OS=Mus musculus OX=10090 GN=Hyal2 PE=1 SV=2	Hyal2	0.0953522	0.00435834	0.0472836	+	0.004	3.338	6	1	1	1	1	473	53.6	7.71	3.09	6.42477	6.54827	6.41901	6.51012	6.45566	6.5592	6.52447	6.55911	6.41593	6.5399	REACTOME_GLYCOSAMINOGLYCAN_METABOLISM|REACTOME_HYALURONAN_METABOLISM|REACTOME_HYALURONAN_UPTAKE_AND_DEGRADATION|REACTOME_METABOLISM_OF_CARBOHYDRATES
P98203	Armadillo repeat protein deleted in velo-cardio-facial syndrome homolog OS=Mus musculus OX=10090 GN=Arvcf PE=1 SV=2	Arvcf	0.0852144	0.00448742	0.0481458	+	0	12.786	4	3	3	0	3	962	105	6.64	8.82	8.50709	8.60181	8.54162	8.58217	8.77161	8.84308	8.68	8.76849	8.62527	8.75611	REACTOME_ADHERENS_JUNCTIONS_INTERACTIONS|REACTOME_CELL_CELL_COMMUNICATION|REACTOME_CELL_CELL_JUNCTION_ORGANIZATION|REACTOME_CELL_JUNCTION_ORGANIZATION|REACTOME_DISEASE|REACTOME_INFECTIOUS_DISEASE|REACTOME_INLA_MEDIATED_ENTRY_OF_LISTERIA_MONOCYTOGENES_INTO_HOST_CELLS|REACTOME_LISTERIA_MONOCYTOGENES_ENTRY_INTO_HOST_CELLS|REACTOME_SIGNALING_BY_RECEPTOR_TYROSINE_KINASES|REACTOME_SIGNALING_BY_VEGF|REA…
Q6P572	Isoform of Q9Z2D1, Phosphatidylinositol-3,5-bisphosphate 3-phosphatase OS=Mus musculus OX=10090 GN=Mtmr2 PE=1 SV=1	Mtmr2	-0.105586	0.00125271	0.0317693	+	0	12.448	7	3	5	0	2	571	65.7	7.88	16.39	9.03104	8.8864	9.01604	8.95346	9.01572	8.90936	8.95317	8.84467	8.9924	8.88654	REACTOME_METABOLISM_OF_LIPIDS|REACTOME_PHOSPHOLIPID_METABOLISM|REACTOME_PI_METABOLISM|REACTOME_SYNTHESIS_OF_PIPS_AT_THE_EARLY_ENDOSOME_MEMBRANE|REACTOME_SYNTHESIS_OF_PIPS_AT_THE_ER_MEMBRANE|REACTOME_SYNTHESIS_OF_PIPS_AT_THE_LATE_ENDOSOME_MEMBRANE|REACTOME_SYNTHESIS_OF_PIPS_AT_THE_PLASMA_MEMBRANE
Q8CFI7	DNA-directed RNA polymerase II subunit RPB2 OS=Mus musculus OX=10090 GN=Polr2b PE=1 SV=2	Polr2b	-0.11545	0.00225325	0.0373564	+	0.001	8.771	2	3	3	3	3	1174	133.8	6.87	8.62	8.30927	8.22949	8.29372	8.16795	8.38608	8.26245	8.28333	8.20362	8.32697	8.15862	REACTOME_ABORTIVE_ELONGATION_OF_HIV_1_TRANSCRIPT_IN_THE_ABSENCE_OF_TAT|REACTOME_ACTIVATION_OF_ANTERIOR_HOX_GENES_IN_HINDBRAIN_DEVELOPMENT_DURING_EARLY_EMBRYOGENESIS|REACTOME_CELL_CYCLE|REACTOME_CHROMOSOME_MAINTENANCE|REACTOME_CYTOSOLIC_SENSORS_OF_PATHOGEN_ASSOCIATED_DNA_|REACTOME_DEVELOPMENTAL_BIOLOGY|REACTOME_DISEASE|REACTOME_DISEASES_OF_SIGNAL_TRANSDUCTION_BY_GROWTH_FACTOR_RECEPTORS_AND_SECOND_…
Q9R0A0	Peroxisomal membrane protein PEX14 OS=Mus musculus OX=10090 GN=Pex14 PE=1 SV=1	Pex14	-0.135078	0.00413255	0.0463968	+	0	27.339	23	4	6	4	4	376	41.2	5.11	29.22	9.58107	9.42786	9.72859	9.52224	9.62327	9.48061	9.6641	9.56487	9.52594	9.452	REACTOME_CLASS_I_PEROXISOMAL_MEMBRANE_PROTEIN_IMPORT|REACTOME_E3_UBIQUITIN_LIGASES_UBIQUITINATE_TARGET_PROTEINS|REACTOME_PEROXISOMAL_PROTEIN_IMPORT|REACTOME_POST_TRANSLATIONAL_PROTEIN_MODIFICATION|REACTOME_PROTEIN_LOCALIZATION|REACTOME_PROTEIN_UBIQUITINATION
Q64442	Sorbitol dehydrogenase OS=Mus musculus OX=10090 GN=Sord PE=1 SV=3	Sord	-0.137897	0.00366143	0.0436197	+	0	22.851	17	5	6	5	5	357	38.2	7.02	20.11	10.4647	10.3815	10.5587	10.3398	10.5989	10.4716	10.5021	10.387	10.4323	10.2873	REACTOME_FORMATION_OF_XYLULOSE_5_PHOSPHATE|REACTOME_FRUCTOSE_METABOLISM|REACTOME_METABOLISM_OF_CARBOHYDRATES
P70451	Tyrosine-protein kinase Fer OS=Mus musculus OX=10090 GN=Fer PE=1 SV=2	Fer	-0.142772	0.00320878	0.0414983	+	0	16.513	5	3	4	0	3	823	94.5	7.05	16.2	9.05454	8.8735	9.06424	8.86935	9.05594	8.97006	9.07365	8.91421	9.01609	8.92347	REACTOME_CRMPS_IN_SEMA3A_SIGNALING|REACTOME_DEVELOPMENTAL_BIOLOGY|REACTOME_NERVOUS_SYSTEM_DEVELOPMENT|REACTOME_SEMA3A_PAK_DEPENDENT_AXON_REPULSION|REACTOME_SEMA3A_PLEXIN_REPULSION_SIGNALING_BY_INHIBITING_INTEGRIN_ADHESION|REACTOME_SEMAPHORIN_INTERACTIONS|REACTOME_SIGNALING_BY_RECEPTOR_TYROSINE_KINASES|REACTOME_SIGNALING_BY_SCF_KIT
E9Q7W0	Isoform of P31266, Recombining-binding protein suppressor of hairless OS=Mus musculus OX=10090 GN=Rbpj PE=1 SV=1	Rbpj	-0.164377	0.000651524	0.0241706	+	0.032	1.42	1	1	1	0	1	485	54.3	8.02	0	7.76224	7.64204	7.62764	7.49095	7.5309	7.31312	7.63263	7.46588	7.65519	7.47472	REACTOME_DEVELOPMENTAL_BIOLOGY|REACTOME_DISEASE|REACTOME_DISEASES_OF_SIGNAL_TRANSDUCTION_BY_GROWTH_FACTOR_RECEPTORS_AND_SECOND_MESSENGERS|REACTOME_NOTCH_HLH_TRANSCRIPTION_PATHWAY|REACTOME_NOTCH1_INTRACELLULAR_DOMAIN_REGULATES_TRANSCRIPTION|REACTOME_NOTCH2_INTRACELLULAR_DOMAIN_REGULATES_TRANSCRIPTION|REACTOME_NOTCH3_INTRACELLULAR_DOMAIN_REGULATES_TRANSCRIPTION|REACTOME_NOTCH4_INTRACELLULAR_DOMAIN_…
Q64520	Guanylate kinase OS=Mus musculus OX=10090 GN=Guk1 PE=1 SV=2	Guk1	-0.164514	0.00137615	0.0320198	+	0	15.454	24	3	6	0	3	198	21.9	6.55	19.31	9.65091	9.50755	9.77842	9.581	9.6611	9.56844	9.82641	9.63998	9.72994	9.52724	REACTOME_ABACAVIR_METABOLISM|REACTOME_ABACAVIR_TRANSPORT_AND_METABOLISM|REACTOME_INTERCONVERSION_OF_NUCLEOTIDE_DI_AND_TRIPHOSPHATES|REACTOME_METABOLISM_OF_NUCLEOTIDES
Q3TQ29	Isoform of Q80U58, Pumilio homolog 2 OS=Mus musculus OX=10090 GN=Pum2 PE=1 SV=1	Pum2	-0.166628	0.00131241	0.0319589	+	0	10.498	3	3	4	0	3	980	105.6	6.86	13.79	9.14403	8.99016	9.21647	9.00635	9.04838	8.95659	9.10299	8.9164	9.09752	8.90675	REACTOME_GOLGI_ASSOCIATED_VESICLE_BIOGENESIS|REACTOME_MEMBRANE_TRAFFICKING|REACTOME_NEDDYLATION|REACTOME_POST_TRANSLATIONAL_PROTEIN_MODIFICATION|REACTOME_TRANS_GOLGI_NETWORK_VESICLE_BUDDING|REACTOME_VESICLE_MEDIATED_TRANSPORT
P10404	MLV-related proviral Env polyprotein OS=Mus musculus OX=10090 PE=1 SV=3	NA	-0.192964	0.00335161	0.0422274	+	0	12.347	6	3	4	1	3	641	69.6	7.96	11.78	6.57823	6.27064	6.63433	6.45454	6.5976	6.40079	6.60051	6.47082	6.49949	6.34855	NA
Q8VCH7	Retinol dehydrogenase 10 OS=Mus musculus OX=10090 GN=Rdh10 PE=1 SV=2	Rdh10	-0.193244	0.00237803	0.0378018	+	0.004	3.278	2	1	1	1	1	341	38.1	7.59	3.03	6.90716	6.78497	6.96004	6.75728	7.21176	7.02924	7.0784	6.78557	7.10204	6.93612	REACTOME_G_ALPHA_I_SIGNALLING_EVENTS|REACTOME_RA_BIOSYNTHESIS_PATHWAY|REACTOME_SIGNALING_BY_GPCR|REACTOME_SIGNALING_BY_NUCLEAR_RECEPTORS|REACTOME_SIGNALING_BY_RETINOIC_ACID|REACTOME_THE_CANONICAL_RETINOID_CYCLE_IN_RODS_TWILIGHT_VISION_|REACTOME_VISUAL_PHOTOTRANSDUCTION
E9Q7G1	Isoform of D3YZZ5, Transmembrane p24-trafficking protein 7 OS=Mus musculus OX=10090 GN=Tmed7 PE=1 SV=1	Tmed7	-0.200956	0.000142652	0.0146375	+	0	12.951	12	2	5	0	2	188	21.3	6.2	16.95	9.49918	9.30381	9.58926	9.37854	9.6611	9.44016	9.674	9.44521	9.59763	9.44866	REACTOME_ASPARAGINE_N_LINKED_GLYCOSYLATION|REACTOME_COPI_DEPENDENT_GOLGI_TO_ER_RETROGRADE_TRAFFIC|REACTOME_COPI_MEDIATED_ANTEROGRADE_TRANSPORT|REACTOME_ER_TO_GOLGI_ANTEROGRADE_TRANSPORT|REACTOME_GOLGI_TO_ER_RETROGRADE_TRANSPORT|REACTOME_INTRA_GOLGI_AND_RETROGRADE_GOLGI_TO_ER_TRAFFIC|REACTOME_MEMBRANE_TRAFFICKING|REACTOME_POST_TRANSLATIONAL_PROTEIN_MODIFICATION|REACTOME_TRANSPORT_TO_THE_GOLGI_AND_…
Q7TPH6	E3 ubiquitin-protein ligase MYCBP2 OS=Mus musculus OX=10090 GN=Mycbp2 PE=1 SV=3	Mycbp2	-0.20265	0.0024496	0.0378889	+	0	12.005	1	3	4	0	3	4749	520.9	7.09	12.92	9.03183	8.78786	8.9902	8.7	8.94218	8.8161	8.84459	8.69244	8.96956	8.76872	NA
Q9D0L7	Armadillo repeat-containing protein 10 OS=Mus musculus OX=10090 GN=Armc10 PE=1 SV=1	Armc10	-0.203643	0.00396367	0.0453555	+	0	17.737	15	4	6	0	4	306	33.3	7.99	13.61	9.40359	9.12508	9.40147	9.18564	9.3813	9.25035	9.47114	9.19671	9.44494	9.32646	NA
P83741	Serine/threonine-protein kinase WNK1 OS=Mus musculus OX=10090 GN=Wnk1 PE=1 SV=2	Wnk1	-0.209665	0.00325402	0.0414983	+	0	21.125	2	6	8	0	3	2377	250.8	6.43	20.91	10.0365	9.73442	10.029	9.82775	9.80674	9.65297	9.78358	9.65889	9.88583	9.61939	REACTOME_ION_CHANNEL_TRANSPORT|REACTOME_STIMULI_SENSING_CHANNELS|REACTOME_TRANSPORT_OF_SMALL_MOLECULES
Q9D7A8	Armadillo repeat-containing protein 1 OS=Mus musculus OX=10090 GN=Armc1 PE=1 SV=1	Armc1	-0.211132	0.00176553	0.0348438	+	0	30.216	24	5	7	5	5	282	31.2	5.57	27.22	10.5602	10.417	10.66	10.3721	10.6154	10.4588	10.7662	10.5031	10.5964	10.3915	NA
A0A1L1SQ67	Isoform of Q8BZB2, Phosphopantothenoylcysteine decarboxylase OS=Mus musculus OX=10090 GN=Ppcdc PE=1 SV=1	Ppcdc	-0.213473	0.00102577	0.028996	+	0.003	3.612	21	1	1	0	1	48	5.4	8.24	3.18	7.47067	7.20543	7.50251	7.37963	7.64476	7.40908	7.68687	7.44341	7.40058	7.20049	REACTOME_COENZYME_A_BIOSYNTHESIS|REACTOME_METABOLISM_OF_VITAMINS_AND_COFACTORS|REACTOME_METABOLISM_OF_WATER_SOLUBLE_VITAMINS_AND_COFACTORS|REACTOME_VITAMIN_B5_PANTOTHENATE_METABOLISM
Q8BU31	Ras-related protein Rap-2c OS=Mus musculus OX=10090 GN=Rap2c PE=1 SV=1	Rap2c	-0.220049	0.00223521	0.0373564	+	0	13.954	17	3	5	2	2	183	20.7	4.94	16.08	9.57277	9.28872	9.53095	9.33746	9.54378	9.3131	9.59666	9.31727	9.51057	9.39793	REACTOME_INNATE_IMMUNE_SYSTEM|REACTOME_NEUTROPHIL_DEGRANULATION
Q62383	Transcription elongation factor SPT6 OS=Mus musculus OX=10090 GN=Supt6h PE=1 SV=2	Supt6h	-0.220964	0.0010878	0.0294854	+	0	28.033	5	7	7	7	7	1726	199	4.93	24.54	9.80858	9.56397	9.82485	9.54187	9.63998	9.51259	9.72576	9.51772	9.78039	9.53859	NA
Q9EQG9	Ceramide transfer protein OS=Mus musculus OX=10090 GN=Cert1 PE=1 SV=1	Cert1	-0.221062	1.2154e-05	0.00598481	+	0	14.772	8	4	5	0	4	624	71.1	5.44	14.14	9.72399	9.48352	9.69203	9.45965	9.67543	9.47674	9.68945	9.45919	9.70386	9.50034	REACTOME_METABOLISM_OF_LIPIDS|REACTOME_SPHINGOLIPID_DE_NOVO_BIOSYNTHESIS|REACTOME_SPHINGOLIPID_METABOLISM
D3Z359	Isoform of Q9Z2W1, Serine/threonine-protein kinase 25 (Fragment) OS=Mus musculus OX=10090 GN=Stk25 PE=1 SV=1	Stk25	-0.226897	0.00226742	0.0373564	+	0	10.657	9	2	3	0	1	234	26.3	5.49	7.04	8.47253	8.19959	8.44097	8.18702	8.18515	8.06288	7.99258	7.69033	8.14884	7.96574	NA
E9QM73	Isoform of Q3UH66, Non-specific serine/threonine protein kinase OS=Mus musculus OX=10090 GN=Wnk2 PE=1 SV=1	Wnk2	-0.228543	0.00323785	0.0414983	+	0	23.848	3	7	8	0	5	2213	233.9	6.1	23.29	9.93773	9.75145	10.0398	9.7374	9.97663	9.84151	10.1266	9.80232	10.0861	9.89152	REACTOME_ION_CHANNEL_TRANSPORT|REACTOME_STIMULI_SENSING_CHANNELS|REACTOME_TRANSPORT_OF_SMALL_MOLECULES
E9QAT4	Protein transport protein Sec16A OS=Mus musculus OX=10090 GN=Sec16a PE=1 SV=1	Sec16a	-0.230013	0.000572047	0.0236206	+	0	25.167	4	7	8	0	7	2357	254	5.81	24.13	10.2652	10.1139	10.425	10.1815	10.4068	10.1257	10.3983	10.1896	10.3916	10.1262	REACTOME_ASPARAGINE_N_LINKED_GLYCOSYLATION|REACTOME_COPII_MEDIATED_VESICLE_TRANSPORT|REACTOME_ER_TO_GOLGI_ANTEROGRADE_TRANSPORT|REACTOME_MEMBRANE_TRAFFICKING|REACTOME_POST_TRANSLATIONAL_PROTEIN_MODIFICATION|REACTOME_TRANSPORT_TO_THE_GOLGI_AND_SUBSEQUENT_MODIFICATION|REACTOME_VESICLE_MEDIATED_TRANSPORT
F7CXI4	Isoform of Q8BX80, Cytosolic endo-beta-N-acetylglucosaminidase (Fragment) OS=Mus musculus OX=10090 GN=Engase PE=1 SV=1	Engase	-0.237152	0.0029433	0.0398425	+	0	21.683	21	5	8	0	5	373	41.4	7.77	26	9.78404	9.64459	9.84327	9.58475	9.79014	9.55682	9.99424	9.63437	9.77772	9.58311	REACTOME_ASPARAGINE_N_LINKED_GLYCOSYLATION|REACTOME_N_GLYCAN_TRIMMING_IN_THE_ER_AND_CALNEXIN_CALRETICULIN_CYCLE|REACTOME_POST_TRANSLATIONAL_PROTEIN_MODIFICATION
Q9JIG8	PRA1 family protein 2 OS=Mus musculus OX=10090 GN=Praf2 PE=1 SV=1	Praf2	-0.238672	0.000909189	0.0275671	+	0.001	5.721	6	1	2	1	1	178	19.5	9.6	7.61	8.99371	8.76965	8.9829	8.78551	9.05313	8.77508	9.07018	8.74903	8.96426	8.79155	NA
I7HIP8	Isoform of P97863, Nuclear factor 1 OS=Mus musculus OX=10090 GN=Nfib PE=1 SV=1	Nfib	-0.244062	0.000773011	0.0258079	+	0.001	9.477	4	2	2	0	1	493	55.1	9.03	6.82	8.61696	8.39439	8.42029	8.0757	8.31178	8.11318	8.51604	8.30941	8.37357	8.12565	REACTOME_RNA_POLYMERASE_III_TRANSCRIPTION|REACTOME_RNA_POLYMERASE_III_TRANSCRIPTION_TERMINATION
A2AF67	Isoform of A2AF47, Dedicator of cytokinesis protein 11 OS=Mus musculus OX=10090 GN=Dock11 PE=1 SV=1	Dock11	-0.247625	0.00140795	0.0321997	+	0	28.886	4	6	8	0	5	1902	218.1	7.77	24.48	8.89003	8.55296	8.78185	8.62893	8.66235	8.43095	8.75934	8.5351	8.81518	8.52268	REACTOME_FACTORS_INVOLVED_IN_MEGAKARYOCYTE_DEVELOPMENT_AND_PLATELET_PRODUCTION|REACTOME_HEMOSTASIS|REACTOME_MET_ACTIVATES_RAP1_AND_RAC1|REACTOME_MET_PROMOTES_CELL_MOTILITY|REACTOME_SIGNALING_BY_MET|REACTOME_SIGNALING_BY_RECEPTOR_TYROSINE_KINASES
Q8BFR4	N-acetylglucosamine-6-sulfatase OS=Mus musculus OX=10090 GN=Gns PE=1 SV=1	Gns	-0.251613	0.000581737	0.0236994	+	0	25.356	15	5	9	4	5	544	61.1	8.24	23.87	10.34	10.0061	10.2392	9.99183	10.0651	9.86219	10.1236	9.84603	10.1589	9.9626	REACTOME_DISEASE|REACTOME_DISEASES_OF_CARBOHYDRATE_METABOLISM|REACTOME_DISEASES_OF_METABOLISM|REACTOME_GLYCOSAMINOGLYCAN_METABOLISM|REACTOME_INNATE_IMMUNE_SYSTEM|REACTOME_KERATAN_SULFATE_DEGRADATION|REACTOME_KERATAN_SULFATE_KERATIN_METABOLISM|REACTOME_LYSOSOME_VESICLE_BIOGENESIS|REACTOME_MEMBRANE_TRAFFICKING|REACTOME_METABOLISM_OF_CARBOHYDRATES|REACTOME_MUCOPOLYSACCHARIDOSES|REACTOME_NEUTROPHIL_D…
O35309	N-myc-interactor OS=Mus musculus OX=10090 GN=Nmi PE=1 SV=1	Nmi	-0.251907	0.00245582	0.0378889	+	0	26.581	27	6	7	5	6	314	35.2	5.05	19.66	10.4085	10.0371	10.2192	9.96496	10.0106	9.87353	10.2672	10.016	10.2752	10.0297	NA
P26450	Phosphatidylinositol 3-kinase regulatory subunit alpha OS=Mus musculus OX=10090 GN=Pik3r1 PE=1 SV=2	Pik3r1	-0.253162	0.000666748	0.0241706	+	0	21.482	10	4	5	2	4	724	83.5	6.28	21.2	9.81459	9.65156	9.94125	9.65744	9.97541	9.67125	10.01	9.7187	9.84682	9.62333	REACTOME_ACTIVATED_NTRK2_SIGNALS_THROUGH_PI3K|REACTOME_ACTIVATED_NTRK3_SIGNALS_THROUGH_PI3K|REACTOME_ADAPTIVE_IMMUNE_SYSTEM|REACTOME_ANTIGEN_ACTIVATES_B_CELL_RECEPTOR_BCR_LEADING_TO_GENERATION_OF_SECOND_MESSENGERS|REACTOME_CD28_CO_STIMULATION|REACTOME_CD28_DEPENDENT_PI3K_AKT_SIGNALING|REACTOME_CELL_CELL_COMMUNICATION|REACTOME_CELL_SURFACE_INTERACTIONS_AT_THE_VASCULAR_WALL|REACTOME_CONSTITUTIVE_SI…
Q9DB70	FUN14 domain-containing protein 1 OS=Mus musculus OX=10090 GN=Fundc1 PE=1 SV=1	Fundc1	-0.254348	0.00119817	0.031171	+	0.001	7.705	19	2	2	0	2	155	17.1	8.63	6.54	7.8676	7.57649	8.0008	7.85747	8.15798	7.90539	8.15336	7.82485	8.00673	7.75052	REACTOME_AUTOPHAGY|REACTOME_MITOPHAGY|REACTOME_RECEPTOR_MEDIATED_MITOPHAGY|REACTOME_SELECTIVE_AUTOPHAGY
A0A1B0GSW9	Isoform of Q9D738, Ankyrin repeat and SOCS box protein 12 (Fragment) OS=Mus musculus OX=10090 GN=Asb12 PE=4 SV=1	Asb12	-0.256197	0.00450806	0.0481883	+	0.002	3.924	13	1	2	0	1	70	8	5.35	6.78	8.31549	8.08623	8.42777	8.0288	8.60791	8.34471	8.56579	8.29728	8.42733	8.30627	REACTOME_ADAPTIVE_IMMUNE_SYSTEM|REACTOME_ANTIGEN_PROCESSING_UBIQUITINATION_PROTEASOME_DEGRADATION|REACTOME_CLASS_I_MHC_MEDIATED_ANTIGEN_PROCESSING_PRESENTATION|REACTOME_NEDDYLATION|REACTOME_POST_TRANSLATIONAL_PROTEIN_MODIFICATION
G3X9K3	Brefeldin A-inhibited guanine nucleotide-exchange protein 1 OS=Mus musculus OX=10090 GN=Arfgef1 PE=1 SV=1	Arfgef1	-0.257862	0.00436107	0.0472836	+	0	26.175	4	8	12	4	5	1846	208.4	5.86	25.68	8.9885	8.80393	9.06823	8.64485	8.97544	8.79841	9.09276	8.84007	9.03256	8.78092	REACTOME_ASSOCIATION_OF_TRIC_CCT_WITH_TARGET_PROTEINS_DURING_BIOSYNTHESIS|REACTOME_PROTEIN_FOLDING
P46664	Adenylosuccinate synthetase isozyme 2 OS=Mus musculus OX=10090 GN=Adss2 PE=1 SV=2	Adss2	-0.264021	0.00217876	0.0373167	+	0	33.8	17	8	20	5	5	456	50	6.38	69.88	9.28846	8.87396	9.19596	8.9713	9.19099	8.95897	9.11806	8.8962	9.0757	8.84862	NA
A0A087WPF8	Isoform of Q8VCR7, Protein ABHD14B (Fragment) OS=Mus musculus OX=10090 GN=Abhd14b PE=1 SV=1	Abhd14b	-0.264616	0.000597831	0.0237047	+	0	16.306	21	2	5	0	2	174	18.4	6.79	18.92	8.5245	8.18805	8.49019	8.19835	8.50794	8.3283	8.58083	8.29839	8.58737	8.35466	REACTOME_BIOLOGICAL_OXIDATIONS|REACTOME_CYTOSOLIC_SULFONATION_OF_SMALL_MOLECULES|REACTOME_PHASE_II_CONJUGATION_OF_COMPOUNDS
Q9JM13	Rab5 GDP/GTP exchange factor OS=Mus musculus OX=10090 GN=Rabgef1 PE=1 SV=1	Rabgef1	-0.264833	0.000706057	0.0248182	+	0.001	7.177	9	3	3	2	3	491	56.8	6.79	7.78	8.97374	8.67254	8.9958	8.68429	8.94335	8.78739	8.94528	8.67452	8.91021	8.62546	REACTOME_MEMBRANE_TRAFFICKING|REACTOME_RAB_GEFS_EXCHANGE_GTP_FOR_GDP_ON_RABS|REACTOME_RAB_REGULATION_OF_TRAFFICKING|REACTOME_TBC_RABGAPS|REACTOME_VESICLE_MEDIATED_TRANSPORT
P47753	F-actin-capping protein subunit alpha-1 OS=Mus musculus OX=10090 GN=Capza1 PE=1 SV=4	Capza1	-0.270952	0.000269528	0.0180699	+	0	65.862	48	8	30	0	6	286	32.9	5.55	138.23	10.3164	10.0308	10.3694	10.0438	10.3255	10.0314	10.3539	10.097	10.3611	10.1685	REACTOME_ADAPTIVE_IMMUNE_SYSTEM|REACTOME_ADVANCED_GLYCOSYLATION_ENDPRODUCT_RECEPTOR_SIGNALING|REACTOME_ASPARAGINE_N_LINKED_GLYCOSYLATION|REACTOME_CELLULAR_RESPONSES_TO_EXTERNAL_STIMULI|REACTOME_COPI_INDEPENDENT_GOLGI_TO_ER_RETROGRADE_TRAFFIC|REACTOME_COPI_MEDIATED_ANTEROGRADE_TRANSPORT|REACTOME_CYTOKINE_SIGNALING_IN_IMMUNE_SYSTEM|REACTOME_ER_TO_GOLGI_ANTEROGRADE_TRANSPORT|REACTOME_FACTORS_INVOLVE…
Q61881	DNA replication licensing factor MCM7 OS=Mus musculus OX=10090 GN=Mcm7 PE=1 SV=1	Mcm7	-0.271744	0.00319498	0.0414983	+	0	10.552	6	3	4	1	3	719	81.2	6.37	10.49	8.46025	8.06911	8.44425	8.12792	8.30036	8.03731	8.37621	8.11682	8.43093	8.30212	REACTOME_ACTIVATION_OF_ATR_IN_RESPONSE_TO_REPLICATION_STRESS|REACTOME_ACTIVATION_OF_THE_PRE_REPLICATIVE_COMPLEX|REACTOME_ASSEMBLY_OF_THE_PRE_REPLICATIVE_COMPLEX|REACTOME_CELL_CYCLE|REACTOME_CELL_CYCLE_CHECKPOINTS|REACTOME_CELL_CYCLE_MITOTIC|REACTOME_DNA_REPLICATION|REACTOME_DNA_REPLICATION_PRE_INITIATION|REACTOME_DNA_STRAND_ELONGATION|REACTOME_G2_M_CHECKPOINTS|REACTOME_MITOTIC_G1_PHASE_AND_G1_S_T…
Q60634	Flotillin-2 OS=Mus musculus OX=10090 GN=Flot2 PE=1 SV=2	Flot2	-0.272208	0.00401505	0.0455942	+	0	25.681	16	5	5	0	5	428	47	5.2	20.19	9.80903	9.36307	9.82877	9.55	9.7494	9.54158	9.74788	9.554	9.91133	9.67673	REACTOME_NEURONAL_SYSTEM|REACTOME_PROTEIN_PROTEIN_INTERACTIONS_AT_SYNAPSES|REACTOME_SYNAPTIC_ADHESION_LIKE_MOLECULES
Q3U9G9	Delta(14)-sterol reductase LBR OS=Mus musculus OX=10090 GN=Lbr PE=1 SV=2	Lbr	-0.272728	0.000104889	0.0136691	+	0	15.791	9	4	5	1	4	626	71.4	9.36	13.27	8.44614	8.17642	8.35861	8.11773	8.33975	8.10355	8.38981	8.05491	8.46649	8.18454	REACTOME_CELL_CYCLE|REACTOME_CELL_CYCLE_MITOTIC|REACTOME_CHOLESTEROL_BIOSYNTHESIS|REACTOME_INITIATION_OF_NUCLEAR_ENVELOPE_NE_REFORMATION|REACTOME_M_PHASE|REACTOME_METABOLISM_OF_LIPIDS|REACTOME_METABOLISM_OF_STEROIDS|REACTOME_MITOTIC_METAPHASE_AND_ANAPHASE|REACTOME_NUCLEAR_ENVELOPE_NE_REASSEMBLY|REACTOME_REGULATION_OF_MECP2_EXPRESSION_AND_ACTIVITY|REACTOME_RNA_POLYMERASE_II_TRANSCRIPTION|REACTOME_…
Q61133	Glutathione S-transferase theta-2 OS=Mus musculus OX=10090 GN=Gstt2 PE=1 SV=4	Gstt2	-0.273028	0.00343265	0.0423455	+	0.001	5.869	7	2	2	0	1	244	27.6	7.55	6.06	6.85283	6.501	7.00745	6.60577	6.93959	6.70303	6.89158	6.70687	6.84574	6.6554	REACTOME_BIOLOGICAL_OXIDATIONS|REACTOME_GLUTATHIONE_CONJUGATION|REACTOME_PHASE_II_CONJUGATION_OF_COMPOUNDS
Q8VE98	CD276 antigen OS=Mus musculus OX=10090 GN=Cd276 PE=1 SV=1	Cd276	-0.274734	0.00286762	0.0397765	+	0.004	3.538	3	1	2	1	1	316	34	4.82	4.78	7.54793	7.1205	7.34277	7.05098	7.43674	7.22463	7.29768	7.04252	7.38315	7.19598	NA
P49615	Cyclin-dependent-like kinase 5 OS=Mus musculus OX=10090 GN=Cdk5 PE=1 SV=1	Cdk5	-0.277965	0.000478614	0.0218476	+	0	25.72	28	7	11	1	6	292	33.3	7.66	31.24	11.0817	10.8953	11.2302	10.9036	11.2109	10.9624	11.3063	10.9909	11.1654	10.8525	REACTOME_ACTIVATED_NTRK2_SIGNALS_THROUGH_CDK5|REACTOME_CRMPS_IN_SEMA3A_SIGNALING|REACTOME_DARPP_32_EVENTS|REACTOME_DEVELOPMENTAL_BIOLOGY|REACTOME_DISEASE|REACTOME_DISEASES_OF_PROGRAMMED_CELL_DEATH|REACTOME_FACTORS_INVOLVED_IN_MEGAKARYOCYTE_DEVELOPMENT_AND_PLATELET_PRODUCTION|REACTOME_G_ALPHA_I_SIGNALLING_EVENTS|REACTOME_HEMOSTASIS|REACTOME_NERVOUS_SYSTEM_DEVELOPMENT|REACTOME_NGF_STIMULATED_TRANSC…
D6RI20	Gm50364 readthrough, Immediate early response 3-interacting protein 1 OS=Mus musculus OX=10090 GN=Gm50364 PE=3 SV=1	Gm50364	-0.283069	0.00170518	0.0347358	+	0	13.035	13	1	2	0	1	152	16.2	8.75	8.72	8.05599	7.69992	8.05117	7.66027	7.93802	7.72515	7.99651	7.78631	7.99706	7.75174	NA
Q9QYI5	DnaJ homolog subfamily B member 2 OS=Mus musculus OX=10090 GN=Dnajb2 PE=1 SV=3	Dnajb2	-0.283578	0.000899918	0.0275671	+	0	13.682	11	3	4	0	3	324	35.6	5.91	10.91	9.37163	9.09456	9.56426	9.18782	9.45692	9.15615	9.46051	9.17297	9.39934	9.22326	NA
Q8BFY6	Peflin OS=Mus musculus OX=10090 GN=Pef1 PE=1 SV=1	Pef1	-0.287881	0.00182436	0.0348785	+	0.001	9.202	12	3	4	3	3	275	29.2	6.3	9.74	8.97439	8.72595	8.98149	8.63532	9.09566	8.74399	9.10207	8.76001	8.93494	8.78388	NA
Q6WKZ8	E3 ubiquitin-protein ligase UBR2 OS=Mus musculus OX=10090 GN=Ubr2 PE=1 SV=2	Ubr2	-0.287887	0.00021292	0.0166017	+	0	21.861	4	4	4	0	4	1755	199	6.33	14.86	8.56696	8.21533	8.56026	8.22813	8.57881	8.3353	8.57687	8.32633	8.56209	8.30046	REACTOME_ADAPTIVE_IMMUNE_SYSTEM|REACTOME_ANTIGEN_PROCESSING_UBIQUITINATION_PROTEASOME_DEGRADATION|REACTOME_CLASS_I_MHC_MEDIATED_ANTIGEN_PROCESSING_PRESENTATION
Q8BXZ1	Protein disulfide-isomerase TMX3 OS=Mus musculus OX=10090 GN=Tmx3 PE=1 SV=2	Tmx3	-0.298974	0.00261307	0.0388989	+	0	32.492	11	6	9	1	6	456	51.8	5.16	31.24	10.9026	10.7449	11.011	10.5765	10.8703	10.6025	10.9696	10.6445	10.956	10.6462	REACTOME_HEMOSTASIS|REACTOME_PLATELET_ACTIVATION_SIGNALING_AND_AGGREGATION|REACTOME_RESPONSE_TO_ELEVATED_PLATELET_CYTOSOLIC_CA2_
Q6ZPJ3	(E3-independent) E2 ubiquitin-conjugating enzyme UBE2O OS=Mus musculus OX=10090 GN=Ube2o PE=1 SV=3	Ube2o	-0.304997	0.00350693	0.043008	+	0	63.884	12	12	18	11	11	1288	140.7	5.06	62.14	11.2602	10.9912	11.3105	10.9184	11.0987	10.9415	11.263	10.9918	11.3607	10.9252	REACTOME_ADAPTIVE_IMMUNE_SYSTEM|REACTOME_ANTIGEN_PROCESSING_UBIQUITINATION_PROTEASOME_DEGRADATION|REACTOME_CLASS_I_MHC_MEDIATED_ANTIGEN_PROCESSING_PRESENTATION
E9Q794	Isoform of Q924K8, Metastasis-associated protein MTA3 OS=Mus musculus OX=10090 GN=Mta3 PE=1 SV=1	Mta3	-0.312554	0.00389637	0.0451732	+	0	11.352	5	3	4	0	1	514	58.4	8.27	12.75	6.29965	5.92486	6.52837	6.12425	6.45566	6.17848	6.3355	5.95206	6.19797	6.07474	REACTOME_CHROMATIN_MODIFYING_ENZYMES|REACTOME_EPIGENETIC_REGULATION_OF_GENE_EXPRESSION|REACTOME_ERCC6_CSB_AND_EHMT2_G9A_POSITIVELY_REGULATE_RRNA_EXPRESSION|REACTOME_HDACS_DEACETYLATE_HISTONES|REACTOME_INTRACELLULAR_SIGNALING_BY_SECOND_MESSENGERS|REACTOME_POSITIVE_EPIGENETIC_REGULATION_OF_RRNA_EXPRESSION|REACTOME_POST_TRANSLATIONAL_PROTEIN_MODIFICATION|REACTOME_PTEN_REGULATION|REACTOME_REGULATION_…
E9Q137	Testis-expressed protein 264 homolog OS=Mus musculus OX=10090 GN=Tex264 PE=2 SV=1	Tex264	-0.313119	0.00207584	0.0363981	+	0	37.14	39	7	10	2	7	309	33.6	5.4	35.6	10.496	10.3329	10.7248	10.4023	10.6768	10.3759	10.7683	10.3315	10.6815	10.3393	REACTOME_HEMOSTASIS|REACTOME_PLATELET_ACTIVATION_SIGNALING_AND_AGGREGATION|REACTOME_RESPONSE_TO_ELEVATED_PLATELET_CYTOSOLIC_CA2_
Q8BMD6	Transmembrane protein 260 OS=Mus musculus OX=10090 GN=Tmem260 PE=2 SV=2	Tmem260	-0.313974	0.00468187	0.0490517	+	0.001	6.673	4	2	2	0	2	703	78.9	8.29	4.06	7.97505	7.44692	7.8475	7.61855	7.91483	7.62738	7.91446	7.6803	7.8909	7.59972	NA
Q9D1X0	Nucleolar protein 3 OS=Mus musculus OX=10090 GN=Nol3 PE=1 SV=1	Nol3	-0.319147	0.000473543	0.0218476	+	0	54.668	50	7	18	7	7	220	24.6	4.07	66.73	10.6864	10.4409	11.0056	10.576	10.9073	10.6149	10.9399	10.637	10.7863	10.461	NA
E9PXB0	Isoform of Q8K1N1, Calcium-independent phospholipase A2-gamma OS=Mus musculus OX=10090 GN=Pnpla8 PE=1 SV=1	Pnpla8	-0.321327	0.00352221	0.0430454	+	0.004	3.356	2	2	3	0	2	558	62.3	7.84	7.38	8.99192	8.62376	8.93797	8.74726	9.14828	8.73534	9.0859	8.6529	8.87347	8.67164	REACTOME_ACYL_CHAIN_REMODELLING_OF_PC|REACTOME_ACYL_CHAIN_REMODELLING_OF_PE|REACTOME_GLYCEROPHOSPHOLIPID_BIOSYNTHESIS|REACTOME_METABOLISM_OF_LIPIDS|REACTOME_PHOSPHOLIPID_METABOLISM
Q9CR24	Mitochondrial coenzyme A diphosphatase NUDT8 OS=Mus musculus OX=10090 GN=Nudt8 PE=1 SV=1	Nudt8	-0.321339	0.00435938	0.0472836	+	0	11.221	11	2	2	2	2	210	23.2	6.52	8.08	8.84957	8.54036	8.9781	8.58258	9.09084	8.73223	9.21456	8.78612	8.8207	8.70578	NA
A0A2R8W6I7	Gm49510 readthrough, Predicted gene, 49510 OS=Mus musculus OX=10090 GN=Gm49510 PE=4 SV=1	Gm49510	-0.322366	0.000730923	0.0252575	+	0	10.159	4	3	4	0	1	596	65.3	5.08	9.69	9.48349	9.18021	9.3613	8.92138	9.26807	9.0303	9.31105	9.03009	9.44607	9.09616	NA
P98197	Phospholipid-transporting ATPase IH OS=Mus musculus OX=10090 GN=Atp11a PE=1 SV=1	Atp11a	-0.323239	0.000806838	0.0260639	+	0	13.958	4	5	6	0	2	1187	135.4	6.48	15.91	9.00439	8.70698	9.07696	8.81822	8.96283	8.71315	9.17153	8.79406	9.12266	8.68976	REACTOME_INNATE_IMMUNE_SYSTEM|REACTOME_ION_CHANNEL_TRANSPORT|REACTOME_ION_TRANSPORT_BY_P_TYPE_ATPASES|REACTOME_NEUTROPHIL_DEGRANULATION|REACTOME_TRANSPORT_OF_SMALL_MOLECULES
Q6P9J9	Anoctamin-6 OS=Mus musculus OX=10090 GN=Ano6 PE=1 SV=1	Ano6	-0.324009	0.00272488	0.0393675	+	0	24.325	9	7	8	0	7	911	106.2	6.76	24.32	10.3863	10.0812	10.3886	9.93299	10.2147	10.0309	10.3001	10.0345	10.3754	9.96543	REACTOME_INNATE_IMMUNE_SYSTEM|REACTOME_ION_CHANNEL_TRANSPORT|REACTOME_NEUTROPHIL_DEGRANULATION|REACTOME_STIMULI_SENSING_CHANNELS|REACTOME_TRANSPORT_OF_SMALL_MOLECULES
Q99L27	GMP reductase 2 OS=Mus musculus OX=10090 GN=Gmpr2 PE=1 SV=2	Gmpr2	-0.324154	0.0013167	0.0319589	+	0.001	7.21	9	3	3	1	2	348	38	7.44	7.53	7.12067	6.67607	6.99182	6.62164	6.91491	6.59167	6.88743	6.68078	7.03094	6.75485	REACTOME_METABOLISM_OF_NUCLEOTIDES|REACTOME_NUCLEOTIDE_SALVAGE|REACTOME_PURINE_SALVAGE
Q9R1S8	Calpain-7 OS=Mus musculus OX=10090 GN=Capn7 PE=2 SV=1	Capn7	-0.324339	0.000484352	0.0218476	+	0	22.593	8	6	7	3	6	813	92.5	7.97	21.73	10.1664	9.92335	10.2383	9.968	10.3583	9.97201	10.3975	9.99502	10.3029	9.98336	REACTOME_DEGRADATION_OF_THE_EXTRACELLULAR_MATRIX|REACTOME_EXTRACELLULAR_MATRIX_ORGANIZATION
Q9WTP6	Adenylate kinase 2, mitochondrial OS=Mus musculus OX=10090 GN=Ak2 PE=1 SV=5	Ak2	-0.324861	0.00362743	0.0434777	+	0	38.89	37	8	16	0	8	239	26.5	7.39	49.38	11.4063	11.2275	11.5255	11.1925	11.4167	11.1842	11.6055	11.1703	11.5204	11.0756	REACTOME_INTERCONVERSION_OF_NUCLEOTIDE_DI_AND_TRIPHOSPHATES|REACTOME_METABOLISM_OF_NUCLEOTIDES
A0A0R4J207	Isoform of Q9JM99, Proteoglycan 4 OS=Mus musculus OX=10090 GN=Prg4 PE=1 SV=1	Prg4	-0.325337	0.000899037	0.0275671	+	0.001	5.036	2	1	1	0	1	423	48	8.72	4.11	8.48897	8.23793	8.63498	8.26195	8.48771	8.24724	8.43811	8.00319	8.38011	8.0529	NA
Q8C9A6	Isoform of Q8C6M1, Ubiquitinyl hydrolase 1 OS=Mus musculus OX=10090 GN=Usp20 PE=1 SV=1	Usp20	-0.340023	0.00188401	0.0348785	+	0.028	1.492	4	1	1	0	1	210	22.9	6.81	2.46	7.22017	6.82963	7.29082	6.83164	7.22538	7.0476	7.31957	6.96851	7.37017	7.04863	REACTOME_DEUBIQUITINATION|REACTOME_DEVELOPMENTAL_BIOLOGY|REACTOME_NERVOUS_SYSTEM_DEVELOPMENT|REACTOME_POST_TRANSLATIONAL_PROTEIN_MODIFICATION|REACTOME_REGULATION_OF_EXPRESSION_OF_SLITS_AND_ROBOS|REACTOME_SIGNALING_BY_ROBO_RECEPTORS|REACTOME_UB_SPECIFIC_PROCESSING_PROTEASES
Q3U1Y4	DENN domain-containing protein 4B OS=Mus musculus OX=10090 GN=Dennd4b PE=1 SV=2	Dennd4b	-0.34402	0.00186444	0.0348785	+	0	17.473	3	2	3	0	2	1499	164.6	7.71	19.56	9.27378	8.87304	9.36693	8.9732	9.50899	9.07935	9.48481	9.15662	9.36986	9.20204	REACTOME_MEMBRANE_TRAFFICKING|REACTOME_RAB_GEFS_EXCHANGE_GTP_FOR_GDP_ON_RABS|REACTOME_RAB_REGULATION_OF_TRAFFICKING|REACTOME_VESICLE_MEDIATED_TRANSPORT
A0A0R4J1G9	Isoform of Q8CI59, Metalloreductase STEAP3 OS=Mus musculus OX=10090 GN=Steap3 PE=1 SV=1	Steap3	-0.353906	0.00290786	0.0398425	+	0	16.499	7	3	4	0	3	488	54.7	9.22	10.88	10.1919	9.78802	10.1521	9.64969	9.83122	9.60915	9.91476	9.68171	9.99081	9.58277	REACTOME_IRON_UPTAKE_AND_TRANSPORT|REACTOME_RNA_POLYMERASE_II_TRANSCRIPTION|REACTOME_TP53_REGULATES_TRANSCRIPTION_OF_CELL_DEATH_GENES|REACTOME_TP53_REGULATES_TRANSCRIPTION_OF_GENES_INVOLVED_IN_CYTOCHROME_C_RELEASE|REACTOME_TRANSCRIPTIONAL_REGULATION_BY_TP53|REACTOME_TRANSFERRIN_ENDOCYTOSIS_AND_RECYCLING|REACTOME_TRANSPORT_OF_SMALL_MOLECULES
Q7M6Y3-5	Isoform of Q7M6Y3, Isoform 5 of Phosphatidylinositol-binding clathrin assembly protein OS=Mus musculus OX=10090 GN=Picalm PE=1 SV=1	Picalm	-0.360432	0.00350195	0.043008	+	0	69.164	27	12	23	0	12	655	70.9	8.37	73.44	11.639	11.3437	11.7505	11.369	11.4446	11.2528	11.6724	11.2845	11.6694	11.1237	REACTOME_CARGO_RECOGNITION_FOR_CLATHRIN_MEDIATED_ENDOCYTOSIS|REACTOME_CLATHRIN_MEDIATED_ENDOCYTOSIS|REACTOME_GOLGI_ASSOCIATED_VESICLE_BIOGENESIS|REACTOME_MEMBRANE_TRAFFICKING|REACTOME_TRANS_GOLGI_NETWORK_VESICLE_BUDDING|REACTOME_VESICLE_MEDIATED_TRANSPORT
D3Z4R2	Isoform of A2CG49, Non-specific serine/threonine protein kinase OS=Mus musculus OX=10090 GN=Kalrn PE=1 SV=1	Kalrn	-0.362182	0.000348821	0.0194562	+	0	11.831	2	3	3	0	3	1295	144.8	6.38	10.24	8.75258	8.40637	8.77536	8.37666	8.8544	8.59537	8.81371	8.45966	8.83646	8.38356	REACTOME_CELL_DEATH_SIGNALLING_VIA_NRAGE_NRIF_AND_NADE|REACTOME_DCC_MEDIATED_ATTRACTIVE_SIGNALING|REACTOME_DEATH_RECEPTOR_SIGNALLING|REACTOME_DEVELOPMENTAL_BIOLOGY|REACTOME_EPH_EPHRIN_SIGNALING|REACTOME_EPHB_MEDIATED_FORWARD_SIGNALING|REACTOME_G_ALPHA_12_13_SIGNALLING_EVENTS|REACTOME_G_ALPHA_Q_SIGNALLING_EVENTS|REACTOME_MAPK_FAMILY_SIGNALING_CASCADES|REACTOME_MAPK6_MAPK4_SIGNALING|REACTOME_NERVOU…
Q9WUL7	ADP-ribosylation factor-like protein 3 OS=Mus musculus OX=10090 GN=Arl3 PE=1 SV=1	Arl3	-0.36625	0.00239181	0.0378018	+	0	23.379	27	3	6	0	3	182	20.5	7.24	30.38	9.94908	9.66596	9.99275	9.49061	9.83344	9.61702	10.1	9.73434	10.1011	9.63719	REACTOME_CARGO_TRAFFICKING_TO_THE_PERICILIARY_MEMBRANE|REACTOME_CILIUM_ASSEMBLY|REACTOME_ORGANELLE_BIOGENESIS_AND_MAINTENANCE|REACTOME_TRAFFICKING_OF_MYRISTOYLATED_PROTEINS_TO_THE_CILIUM
Q811J3	Iron-responsive element-binding protein 2 OS=Mus musculus OX=10090 GN=Ireb2 PE=1 SV=2	Ireb2	-0.367568	0.00130033	0.0319589	+	0	10.699	3	3	4	1	2	963	104.9	6.93	14	8.36238	8.02785	8.54926	8.06808	8.54103	8.10162	8.43423	8.06853	8.27733	8.06029	REACTOME_IRON_UPTAKE_AND_TRANSPORT|REACTOME_TRANSPORT_OF_SMALL_MOLECULES
Q8CII5	Isoform of P52912, Nucleolysin TIA-1 OS=Mus musculus OX=10090 GN=Tia1 PE=1 SV=1	Tia1	-0.368967	0.00122139	0.0313791	+	0	14.899	15	3	4	0	1	285	31.6	8.29	16.54	7.14414	6.67995	7.21785	6.73407	7.16507	6.89363	7.11332	6.76395	7.1826	6.90655	REACTOME_FGFR2_ALTERNATIVE_SPLICING|REACTOME_SIGNALING_BY_FGFR|REACTOME_SIGNALING_BY_FGFR2|REACTOME_SIGNALING_BY_RECEPTOR_TYROSINE_KINASES
Q9ERR7	Selenoprotein F OS=Mus musculus OX=10090 GN=Selenof PE=1 SV=3	Selenof	-0.37077	0.000862911	0.0269785	+	0	7.302	15	2	2	0	2	162	17.8	5.35	6.58	6.73006	6.41112	6.71001	6.2537	6.79105	6.32375	6.98145	6.61862	6.79552	6.54705	NA
P83093	Stromal interaction molecule 2 OS=Mus musculus OX=10090 GN=Stim2 PE=1 SV=2	Stim2	-0.372841	0.000923724	0.0275671	+	0	22.99	9	5	7	0	4	746	83.9	6.79	27.42	9.44692	9.13409	9.44137	9.11533	9.40668	8.99068	9.45638	8.93704	9.4111	9.12111	REACTOME_ADAPTIVE_IMMUNE_SYSTEM|REACTOME_ANTIGEN_ACTIVATES_B_CELL_RECEPTOR_BCR_LEADING_TO_GENERATION_OF_SECOND_MESSENGERS|REACTOME_CARDIAC_CONDUCTION|REACTOME_ELEVATION_OF_CYTOSOLIC_CA2_LEVELS|REACTOME_HEMOSTASIS|REACTOME_ION_HOMEOSTASIS|REACTOME_MUSCLE_CONTRACTION|REACTOME_PLATELET_CALCIUM_HOMEOSTASIS|REACTOME_PLATELET_HOMEOSTASIS|REACTOME_SIGNALING_BY_THE_B_CELL_RECEPTOR_BCR_
Q91YP2	Neurolysin, mitochondrial OS=Mus musculus OX=10090 GN=Nln PE=1 SV=1	Nln	-0.378846	0.00239652	0.0378018	+	0	31.857	14	8	8	0	8	704	80.4	6.44	24.99	10.5869	10.172	10.6292	10.0725	10.432	10.2161	10.4957	10.1607	10.5794	10.2078	REACTOME_ADAPTIVE_IMMUNE_SYSTEM|REACTOME_ANTIGEN_PROCESSING_UBIQUITINATION_PROTEASOME_DEGRADATION|REACTOME_CLASS_A_1_RHODOPSIN_LIKE_RECEPTORS_|REACTOME_CLASS_I_MHC_MEDIATED_ANTIGEN_PROCESSING_PRESENTATION|REACTOME_GPCR_LIGAND_BINDING|REACTOME_PEPTIDE_LIGAND_BINDING_RECEPTORS|REACTOME_SIGNALING_BY_GPCR
P55096	ATP-binding cassette sub-family D member 3 OS=Mus musculus OX=10090 GN=Abcd3 PE=1 SV=2	Abcd3	-0.384445	0.00080041	0.0260639	+	0	21.005	11	5	5	2	4	659	75.4	9.26	14.32	9.39254	8.96335	9.42072	8.96273	9.45416	9.09293	9.44049	8.99627	9.23887	9.00928	REACTOME_ABC_FAMILY_PROTEINS_MEDIATED_TRANSPORT|REACTOME_ABC_TRANSPORTERS_IN_LIPID_HOMEOSTASIS|REACTOME_CLASS_I_PEROXISOMAL_MEMBRANE_PROTEIN_IMPORT|REACTOME_PROTEIN_LOCALIZATION|REACTOME_TRANSPORT_OF_SMALL_MOLECULES
A0A0G2JDG6	Isoform of Q8VDB8, Leucine-rich repeat-containing protein 2 (Fragment) OS=Mus musculus OX=10090 GN=Lrrc2 PE=4 SV=1	Lrrc2	-0.385651	4.72874e-05	0.0116169	+	0.004	3.454	5	1	1	0	1	184	21.3	7.43	2.99	8.21821	7.80393	8.20899	7.81829	8.36858	8.01281	8.26108	7.81952	8.40917	8.08322	NA
Q9WUB4	Dynactin subunit 6 OS=Mus musculus OX=10090 GN=Dctn6 PE=1 SV=1	Dctn6	-0.386653	0.00297394	0.0398425	+	0.001	5.254	14	2	3	0	2	190	20.7	6.67	3.27	9.30814	8.85394	9.46756	9.0538	9.29865	9.09846	9.30271	8.9876	9.44696	8.89695	REACTOME_ADAPTIVE_IMMUNE_SYSTEM|REACTOME_ASPARAGINE_N_LINKED_GLYCOSYLATION|REACTOME_CELLULAR_RESPONSES_TO_EXTERNAL_STIMULI|REACTOME_COPI_INDEPENDENT_GOLGI_TO_ER_RETROGRADE_TRAFFIC|REACTOME_COPI_MEDIATED_ANTEROGRADE_TRANSPORT|REACTOME_ER_TO_GOLGI_ANTEROGRADE_TRANSPORT|REACTOME_GOLGI_TO_ER_RETROGRADE_TRANSPORT|REACTOME_HSP90_CHAPERONE_CYCLE_FOR_STEROID_HORMONE_RECEPTORS_SHR_|REACTOME_INTRA_GOLGI_AN…
P49290	Eosinophil peroxidase OS=Mus musculus OX=10090 GN=Epx PE=1 SV=2	Epx	-0.388249	0.00295183	0.0398425	+	0	56.927	20	13	23	11	13	716	81.3	10.35	69.16	12.2169	11.868	12.3804	11.8151	11.9098	11.5067	11.944	11.7491	11.8036	11.3747	REACTOME_INNATE_IMMUNE_SYSTEM|REACTOME_NEUTROPHIL_DEGRANULATION|REACTOME_ROS_AND_RNS_PRODUCTION_IN_PHAGOCYTES
Q9DD02	Protein Hikeshi OS=Mus musculus OX=10090 GN=Hikeshi PE=1 SV=1	Hikeshi	-0.39294	0.00211327	0.0367274	+	0	18.411	19	3	5	0	3	197	21.6	5.45	17.72	9.38831	9.08854	9.57177	9.22981	9.77914	9.26004	9.79832	9.26515	9.46368	9.19298	REACTOME_CELLULAR_RESPONSE_TO_HEAT_STRESS|REACTOME_CELLULAR_RESPONSES_TO_EXTERNAL_STIMULI|REACTOME_REGULATION_OF_HSF1_MEDIATED_HEAT_SHOCK_RESPONSE
Q8BLF1	Neutral cholesterol ester hydrolase 1 OS=Mus musculus OX=10090 GN=Nceh1 PE=1 SV=1	Nceh1	-0.393059	0.000726981	0.0252575	+	0	37.009	17	7	11	4	7	408	45.7	7.05	37.2	10.8229	10.5418	11.1025	10.5819	10.8887	10.5608	11.1299	10.6894	10.9415	10.5463	REACTOME_BIOLOGICAL_OXIDATIONS|REACTOME_LDL_CLEARANCE|REACTOME_PHASE_I_FUNCTIONALIZATION_OF_COMPOUNDS|REACTOME_PLASMA_LIPOPROTEIN_ASSEMBLY_REMODELING_AND_CLEARANCE|REACTOME_PLASMA_LIPOPROTEIN_CLEARANCE|REACTOME_TRANSPORT_OF_SMALL_MOLECULES
Q8BV57	Soluble scavenger receptor cysteine-rich domain-containing protein SSC5D OS=Mus musculus OX=10090 GN=Ssc5d PE=1 SV=1	Ssc5d	-0.399529	0.000374037	0.0194562	+	0.001	7.264	2	3	3	3	3	1371	144.5	5.68	7.26	8.58714	8.11765	8.66129	8.19351	8.70037	8.3573	8.46788	8.17924	8.54347	8.11481	REACTOME_BINDING_AND_UPTAKE_OF_LIGANDS_BY_SCAVENGER_RECEPTORS|REACTOME_SCAVENGING_BY_CLASS_B_RECEPTORS|REACTOME_VESICLE_MEDIATED_TRANSPORT
Q91XB0	Three-prime repair exonuclease 1 OS=Mus musculus OX=10090 GN=Trex1 PE=1 SV=2	Trex1	-0.400521	0.00193342	0.0349376	+	0.001	6.947	4	1	1	1	1	314	33.7	7.99	3.45	7.26166	6.9235	7.25667	6.70602	6.95903	6.69916	6.82655	6.48215	7.05657	6.54705	REACTOME_CYTOSOLIC_SENSORS_OF_PATHOGEN_ASSOCIATED_DNA_|REACTOME_INNATE_IMMUNE_SYSTEM|REACTOME_IRF3_MEDIATED_INDUCTION_OF_TYPE_I_IFN|REACTOME_REGULATION_OF_INNATE_IMMUNE_RESPONSES_TO_CYTOSOLIC_DNA|REACTOME_STING_MEDIATED_INDUCTION_OF_HOST_IMMUNE_RESPONSES
Q8K299	Scavenger receptor class A member 5 OS=Mus musculus OX=10090 GN=Scara5 PE=1 SV=1	Scara5	-0.401628	0.00174048	0.0347358	+	0.002	3.777	2	1	1	0	1	491	53.6	6.76	2.91	6.88538	6.35455	6.4923	6.1375	6.70116	6.17287	6.494	6.22396	6.62271	6.29852	REACTOME_BINDING_AND_UPTAKE_OF_LIGANDS_BY_SCAVENGER_RECEPTORS|REACTOME_SCAVENGING_BY_CLASS_A_RECEPTORS|REACTOME_VESICLE_MEDIATED_TRANSPORT
A2AQN4	Isoform of Q9QXG4, Propionate--CoA ligase OS=Mus musculus OX=10090 GN=Acss2 PE=1 SV=1	Acss2	-0.404908	0.00210125	0.0366263	+	0	14.642	9	4	4	0	4	714	80.3	6.95	15.14	9.44819	9.11958	9.62181	9.02691	9.5268	9.26859	9.63292	9.23839	9.5946	9.14631	REACTOME_BIOLOGICAL_OXIDATIONS|REACTOME_ETHANOL_OXIDATION|REACTOME_MITOCHONDRIAL_BIOGENESIS|REACTOME_ORGANELLE_BIOGENESIS_AND_MAINTENANCE|REACTOME_PHASE_I_FUNCTIONALIZATION_OF_COMPOUNDS|REACTOME_TRANSCRIPTIONAL_ACTIVATION_OF_MITOCHONDRIAL_BIOGENESIS
Q91YX5	Acyl-CoA:lysophosphatidylglycerol acyltransferase 1 OS=Mus musculus OX=10090 GN=Lpgat1 PE=1 SV=1	Lpgat1	-0.408621	0.00396934	0.0453555	+	0.002	3.845	2	1	1	0	1	370	43.1	8.79	3.71	8.50872	7.92386	8.52662	7.994	8.50411	8.14684	8.34607	7.97869	8.22542	8.02444	REACTOME_ACYL_CHAIN_REMODELLING_OF_PG|REACTOME_GLYCEROPHOSPHOLIPID_BIOSYNTHESIS|REACTOME_METABOLISM_OF_LIPIDS|REACTOME_PHOSPHOLIPID_METABOLISM
P61922	4-aminobutyrate aminotransferase, mitochondrial OS=Mus musculus OX=10090 GN=Abat PE=1 SV=1	Abat	-0.408653	0.00145607	0.0326396	+	0	20.154	19	5	7	2	5	500	56.4	8.09	21.61	8.86253	8.61447	9.00082	8.60553	9.23092	8.6599	9.24827	8.86897	9.09181	8.64222	REACTOME_GABA_SYNTHESIS_RELEASE_REUPTAKE_AND_DEGRADATION|REACTOME_NEURONAL_SYSTEM|REACTOME_NEUROTRANSMITTER_RELEASE_CYCLE|REACTOME_TRANSMISSION_ACROSS_CHEMICAL_SYNAPSES
Q9DCD0	6-phosphogluconate dehydrogenase, decarboxylating OS=Mus musculus OX=10090 GN=Pgd PE=1 SV=3	Pgd	-0.410375	0.00169577	0.0347358	+	0	86.521	41	17	32	16	16	483	53.2	7.23	104.85	12.9175	12.5293	13.0766	12.4528	12.7902	12.438	12.9845	12.6698	13.0276	12.6545	REACTOME_METABOLISM_OF_CARBOHYDRATES|REACTOME_PENTOSE_PHOSPHATE_PATHWAY
A0A0N4SWI4	Isoform of Q9CR98, Protein FAM136A OS=Mus musculus OX=10090 GN=Fam136a PE=1 SV=1	Fam136a	-0.410845	0.00402007	0.0455942	+	0	20.954	41	3	5	0	3	86	9.7	6.49	17.73	9.43072	9.02869	9.52477	9.16748	9.69617	9.13101	9.74008	9.1955	9.45813	9.27297	NA
P10833	Ras-related protein R-Ras OS=Mus musculus OX=10090 GN=Rras PE=1 SV=1	Rras	-0.417223	0.00412517	0.0463968	+	0	32.839	42	7	12	6	6	218	23.7	6.79	39.35	11.2276	10.8453	11.3859	10.7979	10.9507	10.7617	11.2804	10.8984	11.3052	10.7605	REACTOME_DEVELOPMENTAL_BIOLOGY|REACTOME_NERVOUS_SYSTEM_DEVELOPMENT|REACTOME_SEMA3A_PLEXIN_REPULSION_SIGNALING_BY_INHIBITING_INTEGRIN_ADHESION|REACTOME_SEMA4D_IN_SEMAPHORIN_SIGNALING|REACTOME_SEMA4D_MEDIATED_INHIBITION_OF_CELL_ATTACHMENT_AND_MIGRATION|REACTOME_SEMAPHORIN_INTERACTIONS
Q8K370	Acyl-CoA dehydrogenase family member 10 OS=Mus musculus OX=10090 GN=Acad10 PE=1 SV=1	Acad10	-0.418635	0.00118897	0.0311336	+	0	56.312	11	11	22	1	1	1069	118.9	8.24	67.67	7.39566	6.95139	7.4634	7.07549	7.67343	7.07171	7.35434	7.00465	7.30932	6.99972	REACTOME_FATTY_ACID_METABOLISM|REACTOME_METABOLISM_OF_LIPIDS|REACTOME_MITOCHONDRIAL_FATTY_ACID_BETA_OXIDATION
Q9D8Y7	Tumor necrosis factor alpha-induced protein 8-like protein 2 OS=Mus musculus OX=10090 GN=Tnfaip8l2 PE=1 SV=1	Tnfaip8l2	-0.421246	0.00173622	0.0347358	+	0	18.165	22	2	3	2	2	184	20.6	7.96	14.61	8.24973	7.61594	7.95667	7.52369	7.70662	7.37807	7.76924	7.44046	7.88698	7.50484	REACTOME_METABOLISM_OF_LIPIDS|REACTOME_PHOSPHOLIPID_METABOLISM|REACTOME_PI_METABOLISM
P31428	Dipeptidase 1 OS=Mus musculus OX=10090 GN=Dpep1 PE=1 SV=2	Dpep1	-0.421324	0.00425217	0.0467997	+	0	43.887	24	8	14	2	8	410	45.7	6.37	50.76	11.6654	11.3721	11.7161	11.2268	11.4274	11.1597	11.6818	11.2881	11.9111	11.2484	REACTOME_AFLATOXIN_ACTIVATION_AND_DETOXIFICATION|REACTOME_ANTI_INFLAMMATORY_RESPONSE_FAVOURING_LEISHMANIA_PARASITE_INFECTION|REACTOME_ARACHIDONIC_ACID_METABOLISM|REACTOME_BIOLOGICAL_OXIDATIONS|REACTOME_DISEASE|REACTOME_FATTY_ACID_METABOLISM|REACTOME_INFECTIOUS_DISEASE|REACTOME_LEISHMANIA_INFECTION|REACTOME_LTC4_CYSLTR_MEDIATED_IL4_PRODUCTION|REACTOME_METABOLISM_OF_LIPIDS|REACTOME_SYNTHESIS_OF_LEU…
Q64378	Peptidyl-prolyl cis-trans isomerase FKBP5 OS=Mus musculus OX=10090 GN=Fkbp5 PE=1 SV=1	Fkbp5	-0.426002	0.00183374	0.0348785	+	0	19.607	12	4	4	0	4	456	50.9	7.8	16.36	9.43914	8.87951	9.60325	9.34164	9.54879	9.05032	9.39327	8.89768	9.44629	9.13157	REACTOME_CELLULAR_RESPONSES_TO_EXTERNAL_STIMULI|REACTOME_ESR_MEDIATED_SIGNALING|REACTOME_HSP90_CHAPERONE_CYCLE_FOR_STEROID_HORMONE_RECEPTORS_SHR_|REACTOME_MECP2_REGULATES_NEURONAL_RECEPTORS_AND_CHANNELS|REACTOME_RNA_POLYMERASE_II_TRANSCRIPTION|REACTOME_SIGNALING_BY_NUCLEAR_RECEPTORS|REACTOME_TRANSCRIPTIONAL_REGULATION_BY_MECP2
Q8K183	Pyridoxal kinase OS=Mus musculus OX=10090 GN=Pdxk PE=1 SV=1	Pdxk	-0.426056	8.81353e-06	0.00578657	+	0	42.093	33	8	11	8	8	312	35	6.29	38.89	11.0099	10.6353	11.1004	10.6506	10.988	10.5777	11.1049	10.6598	11.0039	10.5535	REACTOME_INNATE_IMMUNE_SYSTEM|REACTOME_METABOLISM_OF_VITAMINS_AND_COFACTORS|REACTOME_METABOLISM_OF_WATER_SOLUBLE_VITAMINS_AND_COFACTORS|REACTOME_NEUTROPHIL_DEGRANULATION
Q9DBB5	Eukaryotic translation initiation factor 4E type 3 OS=Mus musculus OX=10090 GN=Eif4e3 PE=1 SV=1	Eif4e3	-0.426854	0.0037057	0.0439698	+	0.001	8.458	5	1	3	1	1	207	22.8	6.52	6.9	9.39483	8.95635	9.33264	9.12705	9.58586	8.99198	9.59666	9.04655	9.52403	9.17782	REACTOME_ANTIVIRAL_MECHANISM_BY_IFN_STIMULATED_GENES|REACTOME_CYTOKINE_SIGNALING_IN_IMMUNE_SYSTEM|REACTOME_INTERFERON_SIGNALING
P70704	Phospholipid-transporting ATPase IA OS=Mus musculus OX=10090 GN=Atp8a1 PE=1 SV=2	Atp8a1	-0.428893	0.00423318	0.0467997	+	0	50.396	12	11	13	0	11	1164	131.3	6.84	39.69	10.8078	10.6494	11.0123	10.5307	11.1153	10.6307	11.2905	10.6941	11.1049	10.6814	REACTOME_INNATE_IMMUNE_SYSTEM|REACTOME_ION_CHANNEL_TRANSPORT|REACTOME_ION_TRANSPORT_BY_P_TYPE_ATPASES|REACTOME_NEUTROPHIL_DEGRANULATION|REACTOME_TRANSPORT_OF_SMALL_MOLECULES
Q07797	Galectin-3-binding protein OS=Mus musculus OX=10090 GN=Lgals3bp PE=1 SV=1	Lgals3bp	-0.429683	0.00255982	0.0388182	+	0	29.072	13	5	10	4	5	577	64.5	5.14	43.12	10.6093	10.1141	10.4991	9.91699	10.1646	9.96705	10.3713	9.94736	10.4898	10.0402	REACTOME_HEMOSTASIS|REACTOME_PLATELET_ACTIVATION_SIGNALING_AND_AGGREGATION|REACTOME_RESPONSE_TO_ELEVATED_PLATELET_CYTOSOLIC_CA2_
O35607	Bone morphogenetic protein receptor type-2 OS=Mus musculus OX=10090 GN=Bmpr2 PE=1 SV=1	Bmpr2	-0.434332	0.000481585	0.0218476	+	0.018	1.986	1	1	1	1	1	1038	114.9	6.23	2.22	7.19551	6.72019	7.02182	6.55211	7.14662	6.71076	7.03763	6.76239	6.81745	6.30191	REACTOME_SIGNALING_BY_BMP|REACTOME_SIGNALING_BY_TGFB_FAMILY_MEMBERS
F6W7I2	Isoform of Q3TXU5, Deoxyhypusine synthase (Fragment) OS=Mus musculus OX=10090 GN=Dhps PE=1 SV=1	Dhps	-0.436198	0.00141395	0.0321997	+	0.001	8.632	20	2	2	0	2	149	16.3	7.12	6.07	8.98163	8.43066	8.87984	8.46701	8.69508	8.46246	8.95522	8.47004	8.92504	8.42564	REACTOME_GAMMA_CARBOXYLATION_HYPUSINE_FORMATION_AND_ARYLSULFATASE_ACTIVATION|REACTOME_POST_TRANSLATIONAL_PROTEIN_MODIFICATION
A0A0N4SVS3	Isoform of Q9CQ10, Charged multivesicular body protein 3 (Fragment) OS=Mus musculus OX=10090 GN=Chmp3 PE=1 SV=3	Chmp3	-0.442479	0.00178128	0.0348438	+	0.009	2.601	12	1	1	0	1	59	6.5	10.77	2.27	8.27775	7.61384	8.09983	7.72183	8.17911	7.75013	7.88936	7.58145	8.03533	7.60175	REACTOME_AUTOPHAGY|REACTOME_BUDDING_AND_MATURATION_OF_HIV_VIRION|REACTOME_CELL_CYCLE|REACTOME_CELL_CYCLE_MITOTIC|REACTOME_DISEASE|REACTOME_ENDOSOMAL_SORTING_COMPLEX_REQUIRED_FOR_TRANSPORT_ESCRT_|REACTOME_HCMV_INFECTION|REACTOME_HCMV_LATE_EVENTS|REACTOME_HIV_INFECTION|REACTOME_HIV_LIFE_CYCLE|REACTOME_INFECTIOUS_DISEASE|REACTOME_LATE_ENDOSOMAL_MICROAUTOPHAGY|REACTOME_M_PHASE|REACTOME_MEMBRANE_TRAFF…
Q6ZQ93	Ubiquitin carboxyl-terminal hydrolase 34 OS=Mus musculus OX=10090 GN=Usp34 PE=1 SV=3	Usp34	-0.442515	0.00238598	0.0378018	+	0.001	4.142	1	2	2	0	2	3582	408	5.68	2.38	8.37739	8.02865	8.50636	7.95329	8.41364	7.97578	8.43277	7.81952	8.339	8.07935	REACTOME_DEUBIQUITINATION|REACTOME_POST_TRANSLATIONAL_PROTEIN_MODIFICATION|REACTOME_SIGNALING_BY_WNT|REACTOME_TCF_DEPENDENT_SIGNALING_IN_RESPONSE_TO_WNT|REACTOME_UB_SPECIFIC_PROCESSING_PROTEASES
Q2TPA8	Hydroxysteroid dehydrogenase-like protein 2 OS=Mus musculus OX=10090 GN=Hsdl2 PE=1 SV=1	Hsdl2	-0.450734	0.00136175	0.0320198	+	0	11.323	5	2	2	0	2	490	54.2	6.74	7.5	8.29511	7.87043	8.32386	7.90944	8.40234	7.819	8.43471	7.87351	8.2342	7.96417	NA
Q8R2U6	Diphosphoinositol polyphosphate phosphohydrolase 2 OS=Mus musculus OX=10090 GN=Nudt4 PE=1 SV=1	Nudt4	-0.451784	0.00279246	0.039639	+	0.001	9.14	6	2	2	2	2	179	20.1	6.35	8.02	9.63308	9.15809	9.62704	9.21327	9.96847	9.32463	9.87134	9.36628	9.61592	9.39466	REACTOME_INOSITOL_PHOSPHATE_METABOLISM|REACTOME_SYNTHESIS_OF_PYROPHOSPHATES_IN_THE_CYTOSOL
P60487	Chronophin OS=Mus musculus OX=10090 GN=Pdxp PE=1 SV=1	Pdxp	-0.460918	0.00105734	0.0291954	+	0.001	7.713	8	3	4	1	1	292	31.5	5.74	8.53	8.02721	7.59901	8.02236	7.57477	8.25373	7.69137	8.19111	7.60634	8.21606	7.93439	REACTOME_GLUCOSE_METABOLISM|REACTOME_GLYCOLYSIS|REACTOME_METABOLISM_OF_CARBOHYDRATES
Q62314	Trans-Golgi network integral membrane protein 2 OS=Mus musculus OX=10090 GN=Tgoln2 PE=1 SV=1	Tgoln2	-0.464005	0.00169236	0.0347358	+	0.001	4.634	2	1	1	0	1	363	38.8	5.22	3.81	8.0966	7.47141	8.04416	7.51429	8.32238	7.8125	8.16566	7.77926	8.04767	7.77897	REACTOME_CARGO_RECOGNITION_FOR_CLATHRIN_MEDIATED_ENDOCYTOSIS|REACTOME_CLATHRIN_MEDIATED_ENDOCYTOSIS|REACTOME_GOLGI_ASSOCIATED_VESICLE_BIOGENESIS|REACTOME_INTRA_GOLGI_AND_RETROGRADE_GOLGI_TO_ER_TRAFFIC|REACTOME_MEMBRANE_TRAFFICKING|REACTOME_POST_TRANSLATIONAL_PROTEIN_MODIFICATION|REACTOME_REGULATION_OF_INSULIN_LIKE_GROWTH_FACTOR_IGF_TRANSPORT_AND_UPTAKE_BY_INSULIN_LIKE_GROWTH_FACTOR_BINDING_PROTEI…
Q4FZG7	Putative mitochondrial import inner membrane translocase subunit Tim8 A-B OS=Mus musculus OX=10090 GN=Timm8a2 PE=3 SV=1	Timm8a2	-0.464853	0.00337694	0.0423455	+	0.001	5.674	11	1	1	0	1	97	11.3	6.52	4.36	8.94388	8.28283	9.04548	8.68159	9.22176	8.69094	9.16562	8.63096	8.68923	8.45538	REACTOME_MITOCHONDRIAL_PROTEIN_IMPORT|REACTOME_PROTEIN_LOCALIZATION
Q8C9S8	Cysteine protease ATG4A OS=Mus musculus OX=10090 GN=Atg4a PE=2 SV=2	Atg4a	-0.469121	0.000171251	0.0158113	+	0.001	6.351	4	2	3	0	2	396	45.1	4.96	7.73	9.23363	8.70543	9.28706	8.76013	9.33707	8.9162	9.40389	8.89028	9.35489	8.9989	REACTOME_AUTOPHAGY
F6SPK0	Isoform of Q9JJZ4, Ubiquitin-conjugating enzyme E2 J1 (Fragment) OS=Mus musculus OX=10090 GN=Ube2j1 PE=1 SV=1	Ube2j1	-0.470668	0.00391299	0.0451732	+	0	17.475	26	4	4	0	4	262	28.9	7.25	17.18	9.36647	8.82365	9.50432	8.87207	9.08642	8.9011	9.21399	8.78652	9.32009	8.75461	REACTOME_ADAPTIVE_IMMUNE_SYSTEM|REACTOME_ANTIGEN_PROCESSING_UBIQUITINATION_PROTEASOME_DEGRADATION|REACTOME_CLASS_I_MHC_MEDIATED_ANTIGEN_PROCESSING_PRESENTATION
Q9JMC3	DnaJ homolog subfamily A member 4 OS=Mus musculus OX=10090 GN=Dnaja4 PE=1 SV=1	Dnaja4	-0.473279	0.000477214	0.0218476	+	0	42.633	20	8	13	4	8	397	44.9	7.58	44	11.7998	11.4326	11.9408	11.4044	11.9213	11.5634	12.0059	11.4463	11.7663	11.221	REACTOME_CELLULAR_RESPONSES_TO_EXTERNAL_STIMULI|REACTOME_HSP90_CHAPERONE_CYCLE_FOR_STEROID_HORMONE_RECEPTORS_SHR_
O88441	Metaxin-2 OS=Mus musculus OX=10090 GN=Mtx2 PE=1 SV=1	Mtx2	-0.485045	0.00190333	0.0348785	+	0	25.392	16	5	11	5	5	263	29.7	5.63	39.2	11.6449	11.375	11.8803	11.2857	11.773	11.3735	11.9686	11.4391	11.838	11.2063	REACTOME_CRISTAE_FORMATION|REACTOME_MITOCHONDRIAL_BIOGENESIS|REACTOME_MITOCHONDRIAL_PROTEIN_IMPORT|REACTOME_ORGANELLE_BIOGENESIS_AND_MAINTENANCE|REACTOME_PROTEIN_LOCALIZATION
Q9JLC3	Methionine-R-sulfoxide reductase B1 OS=Mus musculus OX=10090 GN=Msrb1 PE=1 SV=3	Msrb1	-0.486629	0.00141457	0.0321997	+	0.001	8.396	28	2	2	2	2	116	12.8	8.27	7.11	8.26297	7.60961	8.14741	7.84931	8.51176	7.9356	8.26272	7.77139	8.30604	7.89185	REACTOME_PROTEIN_REPAIR
Q8BTJ4	Bis(5'-adenosyl)-triphosphatase enpp4 OS=Mus musculus OX=10090 GN=Enpp4 PE=1 SV=1	Enpp4	-0.488305	8.91655e-05	0.0128507	+	0.001	9.02	5	2	2	0	2	456	51.6	6.73	6.95	9.52314	9.06627	9.58611	9.07223	9.53921	9.15107	9.68028	9.11318	9.53863	9.0231	REACTOME_INNATE_IMMUNE_SYSTEM|REACTOME_NEUTROPHIL_DEGRANULATION
F6QSC4	Isoform of A9XX86, Macrophage galactose N-acetyl-galactosamine-specific lectin 2 (Fragment) OS=Mus musculus OX=10090 GN=Mgl2 PE=1 SV=1	Mgl2	-0.488952	0.00177134	0.0348438	+	0	17.443	10	2	3	0	1	374	42.6	5.67	14.06	8.65871	8.31849	9.04061	8.46388	8.8186	8.15105	8.67216	8.14591	8.42687	8.09287	REACTOME_ASPARAGINE_N_LINKED_GLYCOSYLATION|REACTOME_C_TYPE_LECTIN_RECEPTORS_CLRS_|REACTOME_DECTIN_2_FAMILY|REACTOME_INNATE_IMMUNE_SYSTEM|REACTOME_POST_TRANSLATIONAL_PROTEIN_MODIFICATION
Q62086	Serum paraoxonase/arylesterase 2 OS=Mus musculus OX=10090 GN=Pon2 PE=1 SV=2	Pon2	-0.489389	0.000350721	0.0194562	+	0	50.24	27	7	11	7	7	354	39.6	5.83	43.97	10.9776	10.5082	11.0867	10.4361	10.9669	10.5477	11.1289	10.6316	11.0825	10.672	REACTOME_ARACHIDONIC_ACID_METABOLISM|REACTOME_FATTY_ACID_METABOLISM|REACTOME_METABOLISM_OF_LIPIDS|REACTOME_SYNTHESIS_OF_5_EICOSATETRAENOIC_ACIDS
Q91ZT7	Ankyrin repeat and SOCS box protein 10 OS=Mus musculus OX=10090 GN=Asb10 PE=2 SV=1	Asb10	-0.493574	0.00296891	0.0398425	+	0	11.463	5	2	3	0	2	467	51.6	6.67	11.06	6.67432	6.0323	6.82288	6.43672	7.10551	6.5024	7.08691	6.49526	6.86694	6.62199	REACTOME_ADAPTIVE_IMMUNE_SYSTEM|REACTOME_ANTIGEN_PROCESSING_UBIQUITINATION_PROTEASOME_DEGRADATION|REACTOME_CLASS_I_MHC_MEDIATED_ANTIGEN_PROCESSING_PRESENTATION|REACTOME_NEDDYLATION|REACTOME_POST_TRANSLATIONAL_PROTEIN_MODIFICATION
Q9R059	Four and a half LIM domains protein 3 OS=Mus musculus OX=10090 GN=Fhl3 PE=1 SV=2	Fhl3	-0.502996	0.00205204	0.0360877	+	0	20.76	15	4	9	1	4	289	31.8	6.2	33.85	10.8189	10.3676	11.0499	10.5598	11.283	10.596	11.2618	10.6513	11.1514	10.8753	NA
F6TZU3	Isoform of Q8CA72, Gigaxonin (Fragment) OS=Mus musculus OX=10090 GN=Gan PE=1 SV=1	Gan	-0.50603	0.00476913	0.04944	+	0.004	3.155	1	1	1	0	1	597	67.6	5.92	2.38	7.81145	7.04135	7.7822	7.12445	7.57197	7.26174	7.60901	7.16852	7.58938	7.2378	REACTOME_ADAPTIVE_IMMUNE_SYSTEM|REACTOME_ANTIGEN_PROCESSING_UBIQUITINATION_PROTEASOME_DEGRADATION|REACTOME_CLASS_I_MHC_MEDIATED_ANTIGEN_PROCESSING_PRESENTATION|REACTOME_NEDDYLATION|REACTOME_POST_TRANSLATIONAL_PROTEIN_MODIFICATION
A0A1Y7VLZ7	Isoform of Q3V3Q7, Phosphofurin acidic cluster sorting protein 2 OS=Mus musculus OX=10090 GN=Pacs2 PE=1 SV=1	Pacs2	-0.508715	0.000696036	0.0247652	+	0.059	1.146	1	1	1	0	1	894	98.4	6.64	2.11	7.69712	7.11028	7.59699	7.14336	7.55568	7.23444	7.50233	6.90906	7.63824	7.04963	REACTOME_DISEASE|REACTOME_HIV_INFECTION|REACTOME_HOST_INTERACTIONS_OF_HIV_FACTORS|REACTOME_INFECTIOUS_DISEASE|REACTOME_NEF_MEDIATED_DOWNREGULATION_OF_MHC_CLASS_I_COMPLEX_CELL_SURFACE_EXPRESSION|REACTOME_NEF_MEDIATES_DOWN_MODULATION_OF_CELL_SURFACE_RECEPTORS_BY_RECRUITING_THEM_TO_CLATHRIN_ADAPTERS|REACTOME_THE_ROLE_OF_NEF_IN_HIV_1_REPLICATION_AND_DISEASE_PATHOGENESIS
P97449	Aminopeptidase N OS=Mus musculus OX=10090 GN=Anpep PE=1 SV=4	Anpep	-0.518857	0.00197915	0.035383	+	0	93.047	25	18	26	14	18	966	109.6	5.9	81.22	12.3205	11.9047	12.4032	11.7551	11.9609	11.5771	12.1282	11.7171	12.1439	11.4084	REACTOME_INNATE_IMMUNE_SYSTEM|REACTOME_METABOLISM_OF_ANGIOTENSINOGEN_TO_ANGIOTENSINS|REACTOME_NEUTROPHIL_DEGRANULATION|REACTOME_PEPTIDE_HORMONE_METABOLISM
P06537	Glucocorticoid receptor OS=Mus musculus OX=10090 GN=Nr3c1 PE=1 SV=2	Nr3c1	-0.518929	0.000266293	0.0180699	+	0.001	8.755	3	3	3	0	3	792	87.1	6.35	8.06	9.96664	9.61268	10.0026	9.48595	10.0111	9.42706	10.028	9.46147	9.86595	9.29254	REACTOME_CELLULAR_RESPONSES_TO_EXTERNAL_STIMULI|REACTOME_CIRCADIAN_CLOCK|REACTOME_DISEASE|REACTOME_FOXO_MEDIATED_TRANSCRIPTION|REACTOME_FOXO_MEDIATED_TRANSCRIPTION_OF_OXIDATIVE_STRESS_METABOLIC_AND_NEURONAL_GENES|REACTOME_HSP90_CHAPERONE_CYCLE_FOR_STEROID_HORMONE_RECEPTORS_SHR_|REACTOME_INFECTIOUS_DISEASE|REACTOME_NUCLEAR_RECEPTOR_TRANSCRIPTION_PATHWAY|REACTOME_POST_TRANSLATIONAL_PROTEIN_MODIFICA…
Q8C050	Ribosomal protein S6 kinase alpha-5 OS=Mus musculus OX=10090 GN=Rps6ka5 PE=1 SV=2	Rps6ka5	-0.519408	0.000294433	0.0185086	+	0.02	1.859	1	1	1	0	1	863	96.5	7.34	2.35	7.84825	7.20818	7.71041	7.31228	7.75824	7.19204	7.69892	7.14705	7.76365	7.32289	REACTOME_C_TYPE_LECTIN_RECEPTORS_CLRS_|REACTOME_CD209_DC_SIGN_SIGNALING|REACTOME_CREB_PHOSPHORYLATION|REACTOME_CYTOKINE_SIGNALING_IN_IMMUNE_SYSTEM|REACTOME_DEVELOPMENTAL_BIOLOGY|REACTOME_ERK_MAPK_TARGETS|REACTOME_INNATE_IMMUNE_SYSTEM|REACTOME_INTERLEUKIN_17_SIGNALING|REACTOME_L1CAM_INTERACTIONS|REACTOME_MAPK_TARGETS_NUCLEAR_EVENTS_MEDIATED_BY_MAP_KINASES|REACTOME_MYD88_INDEPENDENT_TLR4_CASCADE_|R…
Q62469	Integrin alpha-2 OS=Mus musculus OX=10090 GN=Itga2 PE=1 SV=2	Itga2	-0.519422	0.00326565	0.0414983	+	0	17.559	5	5	5	4	5	1178	128.9	5.21	16.28	8.56897	7.73148	8.13173	7.63206	8.3735	7.89704	7.986	7.60898	8.05235	7.64587	REACTOME_CHL1_INTERACTIONS|REACTOME_DEVELOPMENTAL_BIOLOGY|REACTOME_ECM_PROTEOGLYCANS|REACTOME_EXTRACELLULAR_MATRIX_ORGANIZATION|REACTOME_HEMOSTASIS|REACTOME_INTEGRIN_CELL_SURFACE_INTERACTIONS|REACTOME_L1CAM_INTERACTIONS|REACTOME_LAMININ_INTERACTIONS|REACTOME_MET_ACTIVATES_PTK2_SIGNALING|REACTOME_MET_PROMOTES_CELL_MOTILITY|REACTOME_MUSCLE_CONTRACTION|REACTOME_NERVOUS_SYSTEM_DEVELOPMENT|REACTOME_NO…
Q61387	Cytochrome c oxidase subunit 7A-related protein, mitochondrial OS=Mus musculus OX=10090 GN=Cox7a2l PE=1 SV=1	Cox7a2l	-0.524138	0.00341175	0.0423455	+	0.001	9.583	24	3	3	0	3	111	12.4	9.6	8.52	10.3609	9.70568	10.4671	9.83934	9.59776	9.3466	10.4056	9.72252	10.1657	9.76218	REACTOME_RESPIRATORY_ELECTRON_TRANSPORT|REACTOME_RESPIRATORY_ELECTRON_TRANSPORT_ATP_SYNTHESIS_BY_CHEMIOSMOTIC_COUPLING_AND_HEAT_PRODUCTION_BY_UNCOUPLING_PROTEINS_|REACTOME_RNA_POLYMERASE_II_TRANSCRIPTION|REACTOME_THE_CITRIC_ACID_TCA_CYCLE_AND_RESPIRATORY_ELECTRON_TRANSPORT|REACTOME_TP53_REGULATES_METABOLIC_GENES|REACTOME_TRANSCRIPTIONAL_REGULATION_BY_TP53
E9Q9M1	Isoform of Q3V1L4, Cytosolic purine 5'-nucleotidase OS=Mus musculus OX=10090 GN=Nt5c2 PE=1 SV=1	Nt5c2	-0.527083	0.00208241	0.0364052	+	0	44.217	21	8	14	0	8	586	67.7	6.74	49.52	11.4904	10.9634	11.5659	10.8723	11.106	10.8528	11.3691	10.8185	11.3738	10.7628	REACTOME_ABACAVIR_METABOLISM|REACTOME_ABACAVIR_TRANSPORT_AND_METABOLISM|REACTOME_METABOLISM_OF_NUCLEOTIDES|REACTOME_NUCLEOBASE_CATABOLISM|REACTOME_PURINE_CATABOLISM
Q8VD31	Tapasin-related protein OS=Mus musculus OX=10090 GN=Tapbpl PE=1 SV=2	Tapbpl	-0.533217	0.00298026	0.0398425	+	0.02	1.845	2	1	1	1	1	451	48.7	6.46	2.48	7.90987	7.18044	7.62836	6.96115	7.28014	7.01997	7.54202	7.08321	7.61007	7.05961	NA
A0A668KL31	Isoform of Q60592, Non-specific serine/threonine protein kinase OS=Mus musculus OX=10090 GN=Mast2 PE=1 SV=1	Mast2	-0.535215	0.00262661	0.0388989	+	0	10.886	2	2	2	0	2	1714	188.5	7.44	10.12	7.83288	7.2435	8.12969	7.45567	8.29999	7.6758	8.31424	7.74834	8.03238	7.8098	NA
Q8R3E3	WD repeat domain phosphoinositide-interacting protein 1 OS=Mus musculus OX=10090 GN=Wipi1 PE=1 SV=1	Wipi1	-0.54753	3.65539e-05	0.0114374	+	0	10.593	10	4	4	0	4	446	48.7	6.46	8.98	8.52819	7.91696	8.61766	8.03181	8.68893	8.23804	8.6165	8.07626	8.62685	8.0774	REACTOME_AUTOPHAGY|REACTOME_IRE1ALPHA_ACTIVATES_CHAPERONES|REACTOME_UNFOLDED_PROTEIN_RESPONSE_UPR_
P47856	Glutamine--fructose-6-phosphate aminotransferase [isomerizing] 1 OS=Mus musculus OX=10090 GN=Gfpt1 PE=1 SV=3	Gfpt1	-0.54774	0.00186349	0.0348785	+	0	62.086	31	18	26	1	15	697	78.5	6.84	65.74	12.0365	11.5427	12.1145	11.4433	11.8072	11.4874	11.9398	11.4346	12.2047	11.4561	REACTOME_ASPARAGINE_N_LINKED_GLYCOSYLATION|REACTOME_BIOSYNTHESIS_OF_THE_N_GLYCAN_PRECURSOR_DOLICHOL_LIPID_LINKED_OLIGOSACCHARIDE_LLO_AND_TRANSFER_TO_A_NASCENT_PROTEIN|REACTOME_DISEASE|REACTOME_DISEASES_ASSOCIATED_WITH_GLYCOSYLATION_PRECURSOR_BIOSYNTHESIS|REACTOME_DISEASES_OF_GLYCOSYLATION|REACTOME_DISEASES_OF_METABOLISM|REACTOME_IRE1ALPHA_ACTIVATES_CHAPERONES|REACTOME_POST_TRANSLATIONAL_PROTEIN_M…
A0A0A6YXU9	Isoform of P27090, Transforming growth factor beta OS=Mus musculus OX=10090 GN=Tgfb2 PE=1 SV=1	Tgfb2	-0.553011	0.00290952	0.0398425	+	0.001	4.895	4	2	2	0	2	442	50.4	8.34	3.32	8.82841	8.52242	9.10597	8.38708	8.89584	8.40929	8.99897	8.51612	9.17842	8.40765	REACTOME_ECM_PROTEOGLYCANS|REACTOME_ELASTIC_FIBRE_FORMATION|REACTOME_EXTRACELLULAR_MATRIX_ORGANIZATION|REACTOME_HEMOSTASIS|REACTOME_MOLECULES_ASSOCIATED_WITH_ELASTIC_FIBRES|REACTOME_PLATELET_ACTIVATION_SIGNALING_AND_AGGREGATION|REACTOME_RESPONSE_TO_ELEVATED_PLATELET_CYTOSOLIC_CA2_
Q8BVA2	Transmembrane protein 222 OS=Mus musculus OX=10090 GN=Tmem222 PE=1 SV=1	Tmem222	-0.553842	0.00221552	0.0373564	+	0.001	6.695	13	1	1	1	1	208	23.2	6.61	5.18	6.72918	5.92486	6.74241	6.06307	6.62115	6.20435	6.65346	6.22619	6.71606	6.27456	NA
Q8VHL1	Histone-lysine N-methyltransferase SETD7 OS=Mus musculus OX=10090 GN=Setd7 PE=1 SV=2	Setd7	-0.554891	0.000787456	0.0259948	+	0	36.777	28	8	10	8	8	366	40.5	4.65	35.06	11.0942	10.7492	11.2942	10.6853	11.3509	10.7598	11.4672	10.7579	11.3766	10.8565	REACTOME_CHROMATIN_MODIFYING_ENZYMES|REACTOME_PKMTS_METHYLATE_HISTONE_LYSINES
P51660	Peroxisomal multifunctional enzyme type 2 OS=Mus musculus OX=10090 GN=Hsd17b4 PE=1 SV=3	Hsd17b4	-0.556829	0.000303123	0.0186578	+	0	55.873	17	11	15	11	11	735	79.4	8.57	52.54	11.2509	10.8358	11.3958	10.7267	11.2619	10.762	11.4103	10.7579	11.2053	10.6576	REACTOME_ALPHA_LINOLENIC_OMEGA3_AND_LINOLEIC_OMEGA6_ACID_METABOLISM|REACTOME_BETA_OXIDATION_OF_PRISTANOYL_COA|REACTOME_BETA_OXIDATION_OF_VERY_LONG_CHAIN_FATTY_ACIDS|REACTOME_BILE_ACID_AND_BILE_SALT_METABOLISM|REACTOME_FATTY_ACID_METABOLISM|REACTOME_METABOLISM_OF_LIPIDS|REACTOME_METABOLISM_OF_STEROIDS|REACTOME_PEROXISOMAL_LIPID_METABOLISM|REACTOME_PEROXISOMAL_PROTEIN_IMPORT|REACTOME_PROTEIN_LOCALI…
Q61578	NADPH:adrenodoxin oxidoreductase, mitochondrial OS=Mus musculus OX=10090 GN=Fdxr PE=1 SV=1	Fdxr	-0.560689	0.000100699	0.0136691	+	0.001	5.573	4	2	2	2	2	494	54.2	8.66	6.44	8.36965	7.72267	8.2846	7.65249	8.16451	7.71567	8.18479	7.64893	8.26427	7.72461	REACTOME_BIOLOGICAL_OXIDATIONS|REACTOME_CYTOCHROME_P450_ARRANGED_BY_SUBSTRATE_TYPE|REACTOME_DISEASE|REACTOME_DISEASES_OF_METABOLISM|REACTOME_ENDOGENOUS_STEROLS|REACTOME_METABOLIC_DISORDERS_OF_BIOLOGICAL_OXIDATION_ENZYMES|REACTOME_METABOLISM_OF_LIPIDS|REACTOME_METABOLISM_OF_STEROID_HORMONES|REACTOME_METABOLISM_OF_STEROIDS|REACTOME_MITOCHONDRIAL_IRON_SULFUR_CLUSTER_BIOGENESIS|REACTOME_PHASE_I_FUNCT…
Q00993	Tyrosine-protein kinase receptor UFO OS=Mus musculus OX=10090 GN=Axl PE=1 SV=2	Axl	-0.57008	0.00430175	0.0470684	+	0.001	4.172	1	1	1	0	1	888	98.1	5.74	2.84	7.6336	6.81903	7.49144	6.8574	7.08626	6.86627	7.32267	6.68898	7.49932	6.95122	REACTOME_CELL_SURFACE_INTERACTIONS_AT_THE_VASCULAR_WALL|REACTOME_HEMOSTASIS|REACTOME_SIGNALING_BY_RECEPTOR_TYROSINE_KINASES|REACTOME_SIGNALING_BY_VEGF
Q8CEE7	Retinol dehydrogenase 13 OS=Mus musculus OX=10090 GN=Rdh13 PE=1 SV=1	Rdh13	-0.57099	0.000244205	0.0176993	+	0.001	7.175	5	2	2	0	2	334	36.4	8.85	6.85	8.3629	7.70291	8.30775	7.8176	8.53853	8.00455	8.60268	7.90268	8.49476	8.02393	REACTOME_RA_BIOSYNTHESIS_PATHWAY|REACTOME_SIGNALING_BY_NUCLEAR_RECEPTORS|REACTOME_SIGNALING_BY_RETINOIC_ACID
Q8VE47	Ubiquitin-like modifier-activating enzyme 5 OS=Mus musculus OX=10090 GN=Uba5 PE=1 SV=2	Uba5	-0.572084	0.00135126	0.0320198	+	0	36.724	21	6	7	4	6	403	44.8	4.96	28.31	11.0013	10.3481	11.0083	10.2668	10.5972	10.26	10.7857	10.3015	10.9163	10.2719	REACTOME_ADAPTIVE_IMMUNE_SYSTEM|REACTOME_ANTIGEN_PROCESSING_UBIQUITINATION_PROTEASOME_DEGRADATION|REACTOME_CLASS_I_MHC_MEDIATED_ANTIGEN_PROCESSING_PRESENTATION
P14142	Solute carrier family 2, facilitated glucose transporter member 4 OS=Mus musculus OX=10090 GN=Slc2a4 PE=1 SV=3	Slc2a4	-0.575303	0.00375159	0.0444252	+	0	17.833	6	3	4	1	3	509	54.7	8.13	16.04	10.9517	10.7156	11.4063	10.6949	11.4057	10.9106	11.702	10.9733	11.414	10.7087	REACTOME_CELLULAR_HEXOSE_TRANSPORT|REACTOME_DEVELOPMENTAL_BIOLOGY|REACTOME_DISEASE|REACTOME_DISORDERS_OF_TRANSMEMBRANE_TRANSPORTERS|REACTOME_INTEGRATION_OF_ENERGY_METABOLISM|REACTOME_MEMBRANE_TRAFFICKING|REACTOME_METABOLISM_OF_CARBOHYDRATES|REACTOME_METABOLISM_OF_VITAMINS_AND_COFACTORS|REACTOME_METABOLISM_OF_WATER_SOLUBLE_VITAMINS_AND_COFACTORS|REACTOME_REGULATION_OF_INSULIN_SECRETION|REACTOME_SL…
Q9EP69	Phosphatidylinositol-3-phosphatase SAC1 OS=Mus musculus OX=10090 GN=Sacm1l PE=1 SV=1	Sacm1l	-0.57721	0.00155183	0.0333013	+	0	84.544	28	17	37	0	17	587	66.9	7.3	104.41	12.9343	12.6447	13.2252	12.5563	13.0664	12.4589	13.3259	12.6047	13.1867	12.5878	REACTOME_METABOLISM_OF_LIPIDS|REACTOME_PHOSPHOLIPID_METABOLISM|REACTOME_PI_METABOLISM|REACTOME_SYNTHESIS_OF_PIPS_AT_THE_ER_MEMBRANE|REACTOME_SYNTHESIS_OF_PIPS_AT_THE_GOLGI_MEMBRANE
Q99J56	Derlin-1 OS=Mus musculus OX=10090 GN=Derl1 PE=1 SV=1	Derl1	-0.58946	0.000352471	0.0194562	+	0.001	5.734	4	1	1	1	1	251	28.8	9.51	4.25	8.61782	7.98213	8.58312	7.81201	8.53666	7.9978	8.4352	7.95936	8.53553	8.00973	REACTOME_ABC_FAMILY_PROTEINS_MEDIATED_TRANSPORT|REACTOME_ABC_TRANSPORTER_DISORDERS|REACTOME_ASPARAGINE_N_LINKED_GLYCOSYLATION|REACTOME_DEFECTIVE_CFTR_CAUSES_CYSTIC_FIBROSIS|REACTOME_DISEASE|REACTOME_DISORDERS_OF_TRANSMEMBRANE_TRANSPORTERS|REACTOME_E3_UBIQUITIN_LIGASES_UBIQUITINATE_TARGET_PROTEINS|REACTOME_N_GLYCAN_TRIMMING_IN_THE_ER_AND_CALNEXIN_CALRETICULIN_CYCLE|REACTOME_POST_TRANSLATIONAL_PROT…
Q5NCB2	Predicted gene 12185 OS=Mus musculus OX=10090 GN=Gm12185 PE=1 SV=1	Gm12185	-0.592326	0.00341655	0.0423455	+	0	35.63	13	7	7	4	6	835	94.4	6.29	30.51	10.7622	10.2201	10.5426	9.94914	10.2502	9.96378	10.8275	10.1641	10.9208	10.0445	NA
A0A0R4J256	Isoform of P28076, Proteasome subunit beta OS=Mus musculus OX=10090 GN=Psmb9 PE=1 SV=1	Psmb9	-0.602006	0.0042879	0.0470684	+	0	17.233	15	2	6	1	2	219	23.3	5.01	23.6	10.1537	9.26455	9.90413	9.31335	9.49584	9.2497	9.99761	9.36494	9.92657	9.27527	REACTOME_ABC_FAMILY_PROTEINS_MEDIATED_TRANSPORT|REACTOME_ABC_TRANSPORTER_DISORDERS|REACTOME_ADAPTIVE_IMMUNE_SYSTEM|REACTOME_ANTIGEN_PROCESSING_CROSS_PRESENTATION|REACTOME_ANTIGEN_PROCESSING_UBIQUITINATION_PROTEASOME_DEGRADATION|REACTOME_APC_C_CDH1_MEDIATED_DEGRADATION_OF_CDC20_AND_OTHER_APC_C_CDH1_TARGETED_PROTEINS_IN_LATE_MITOSIS_EARLY_G1|REACTOME_APC_C_MEDIATED_DEGRADATION_OF_CELL_CYCLE_PROTEIN…
Q59J78	NADH dehydrogenase [ubiquinone] 1 alpha subcomplex assembly factor 2 OS=Mus musculus OX=10090 GN=Ndufaf2 PE=1 SV=1	Ndufaf2	-0.607309	5.52097e-05	0.0116169	+	0	15.463	27	5	8	3	5	168	19.6	8.25	22.03	10.8065	10.2608	10.9066	10.3801	10.9423	10.2937	11.0736	10.3634	10.9412	10.3356	REACTOME_COMPLEX_I_BIOGENESIS|REACTOME_RESPIRATORY_ELECTRON_TRANSPORT|REACTOME_RESPIRATORY_ELECTRON_TRANSPORT_ATP_SYNTHESIS_BY_CHEMIOSMOTIC_COUPLING_AND_HEAT_PRODUCTION_BY_UNCOUPLING_PROTEINS_|REACTOME_THE_CITRIC_ACID_TCA_CYCLE_AND_RESPIRATORY_ELECTRON_TRANSPORT
A0A0R4J0X2	Isoform of Q8VC19, 5-aminolevulinate synthase OS=Mus musculus OX=10090 GN=Alas1 PE=1 SV=1	Alas1	-0.610499	0.0046617	0.0489563	+	0	7.491	2	1	1	0	1	641	70.9	8.53	4.96	6.44017	5.54406	6.60085	5.86517	6.60757	6.1097	6.65671	6.00228	6.40153	6.13312	REACTOME_HEME_BIOSYNTHESIS|REACTOME_METABOLISM_OF_LIPIDS|REACTOME_METABOLISM_OF_PORPHYRINS|REACTOME_MITOCHONDRIAL_BIOGENESIS|REACTOME_ORGANELLE_BIOGENESIS_AND_MAINTENANCE|REACTOME_REGULATION_OF_LIPID_METABOLISM_BY_PPARALPHA|REACTOME_TRANSCRIPTIONAL_ACTIVATION_OF_MITOCHONDRIAL_BIOGENESIS
Q6PKB0	Isoform of Q61559, Fcgrt protein OS=Mus musculus OX=10090 GN=Fcgrt PE=1 SV=1	Fcgrt	-0.612478	0.00168787	0.0347358	+	0.001	5.363	4	2	4	0	2	369	40.5	5.54	10.62	9.99894	9.35634	9.93486	9.19409	9.44783	9.12087	9.6046	9.04321	9.71975	8.92909	NA
Q8K2Q7	BRO1 domain-containing protein BROX OS=Mus musculus OX=10090 GN=Brox PE=1 SV=1	Brox	-0.617937	0.000298662	0.0185768	+	0	18.23	14	4	4	4	4	411	46.2	7.69	12.07	9.87602	9.42076	9.97617	9.23008	9.92273	9.31702	9.96454	9.24892	9.83535	9.26835	NA
P53995	Anaphase-promoting complex subunit 1 OS=Mus musculus OX=10090 GN=Anapc1 PE=1 SV=2	Anapc1	-0.620176	0.000419894	0.0205361	+	0.018	2.016	0	1	1	1	1	1944	215.9	6.35	1.78	7.70819	7.20129	8.00358	7.1837	7.95942	7.43942	7.94864	7.36252	7.98673	7.31875	REACTOME_ABERRANT_REGULATION_OF_MITOTIC_EXIT_IN_CANCER_DUE_TO_RB1_DEFECTS|REACTOME_ADAPTIVE_IMMUNE_SYSTEM|REACTOME_ANTIGEN_PROCESSING_UBIQUITINATION_PROTEASOME_DEGRADATION|REACTOME_APC_C_CDC20_MEDIATED_DEGRADATION_OF_CYCLIN_B|REACTOME_APC_C_CDH1_MEDIATED_DEGRADATION_OF_CDC20_AND_OTHER_APC_C_CDH1_TARGETED_PROTEINS_IN_LATE_MITOSIS_EARLY_G1|REACTOME_APC_C_MEDIATED_DEGRADATION_OF_CELL_CYCLE_PROTEINS|…
Q61107	Guanylate-binding protein 4 OS=Mus musculus OX=10090 GN=Gbp4 PE=1 SV=1	Gbp4	-0.627241	0.00446777	0.0480875	+	0	60.013	24	12	16	9	10	620	70.8	6.64	56.15	11.3354	10.546	11.0298	10.4017	10.5232	10.2884	10.9952	10.3745	11.1801	10.317	REACTOME_CYTOKINE_SIGNALING_IN_IMMUNE_SYSTEM|REACTOME_INTERFERON_ALPHA_BETA_SIGNALING|REACTOME_INTERFERON_GAMMA_SIGNALING|REACTOME_INTERFERON_SIGNALING
Q9Z2S7-4	Isoform of Q9Z2S7, Isoform 4 of TSC22 domain family protein 3 OS=Mus musculus OX=10090 GN=Tsc22d3 PE=1 SV=2	Tsc22d3	-0.639533	0.000133403	0.0146375	+	0	17.705	20	3	3	1	3	234	25.8	4.83	12.14	9.0519	8.33634	9.12243	8.45219	9.23054	8.55266	9.18094	8.51277	8.96051	8.49469	REACTOME_ION_CHANNEL_TRANSPORT|REACTOME_STIMULI_SENSING_CHANNELS|REACTOME_TRANSPORT_OF_SMALL_MOLECULES
Q99KQ4	Nicotinamide phosphoribosyltransferase OS=Mus musculus OX=10090 GN=Nampt PE=1 SV=1	Nampt	-0.640042	0.00482775	0.0497856	+	0	140.992	54	22	59	22	22	491	55.4	7.15	233.55	13.3558	13.1484	13.7718	13.0276	13.6334	13.0056	13.9211	13.1217	13.8213	12.9999	REACTOME_BMAL1_CLOCK_NPAS2_ACTIVATES_CIRCADIAN_GENE_EXPRESSION|REACTOME_CIRCADIAN_CLOCK|REACTOME_METABOLISM_OF_VITAMINS_AND_COFACTORS|REACTOME_METABOLISM_OF_WATER_SOLUBLE_VITAMINS_AND_COFACTORS|REACTOME_NICOTINAMIDE_SALVAGING|REACTOME_NICOTINATE_METABOLISM
A0A1B0GRV0	Isoform of Q9Z0S1, 3'(2'),5'-bisphosphate nucleotidase 1 OS=Mus musculus OX=10090 GN=Bpnt1 PE=1 SV=1	Bpnt1	-0.642858	0.000622545	0.023733	+	0	62.595	44	11	22	1	11	323	35	5.82	75.79	11.7759	11.3354	12.0964	11.249	11.8664	11.2777	12.0617	11.3986	12.0086	11.334	REACTOME_BIOLOGICAL_OXIDATIONS|REACTOME_CYTOSOLIC_SULFONATION_OF_SMALL_MOLECULES|REACTOME_PHASE_II_CONJUGATION_OF_COMPOUNDS
Q8VEK0	Cell cycle control protein 50A OS=Mus musculus OX=10090 GN=Tmem30a PE=1 SV=1	Tmem30a	-0.653502	2.79598e-05	0.00971849	+	0	16.074	12	4	4	0	4	364	41	8.37	15.16	10.7258	9.9861	10.67	10.1201	10.7322	10.0811	10.6736	10.0001	10.6299	9.97647	REACTOME_INNATE_IMMUNE_SYSTEM|REACTOME_NEUTROPHIL_DEGRANULATION
Q99L20	Glutathione S-transferase theta-3 OS=Mus musculus OX=10090 GN=Gstt3 PE=1 SV=1	Gstt3	-0.655169	0.00301057	0.0399763	+	0	19.973	19	4	5	2	3	241	27.4	7.74	19.07	11.018	10.1343	10.8638	10.1496	10.4361	10.1102	10.6359	10.1061	10.9735	10.1514	NA
Q64471	Glutathione S-transferase theta-1 OS=Mus musculus OX=10090 GN=Gstt1 PE=1 SV=4	Gstt1	-0.65526	0.00137638	0.0320198	+	0	42.79	27	6	18	3	6	240	27.4	7.27	61.34	12.2081	11.523	12.2157	11.4198	11.7361	11.3559	12.0334	11.4585	12.2258	11.3856	NA
O08547	Vesicle-trafficking protein SEC22b OS=Mus musculus OX=10090 GN=Sec22b PE=1 SV=3	Sec22b	-0.660847	0.000192482	0.0165307	+	0	46.643	50	9	20	1	9	215	24.7	8.51	70.6	11.5313	11.0453	11.774	11.0079	11.6764	11.0509	11.8563	11.1112	11.7333	11.0518	REACTOME_ADAPTIVE_IMMUNE_SYSTEM|REACTOME_ANTIGEN_PROCESSING_CROSS_PRESENTATION|REACTOME_ASPARAGINE_N_LINKED_GLYCOSYLATION|REACTOME_CARGO_CONCENTRATION_IN_THE_ER|REACTOME_CLASS_I_MHC_MEDIATED_ANTIGEN_PROCESSING_PRESENTATION|REACTOME_COPI_DEPENDENT_GOLGI_TO_ER_RETROGRADE_TRAFFIC|REACTOME_COPII_MEDIATED_VESICLE_TRANSPORT|REACTOME_ER_TO_GOLGI_ANTEROGRADE_TRANSPORT|REACTOME_GOLGI_TO_ER_RETROGRADE_TRAN…
P18406	CCN family member 1 OS=Mus musculus OX=10090 GN=Ccn1 PE=1 SV=1	Ccn1	-0.662287	0.00197435	0.035383	+	0.001	8.066	6	2	3	2	2	379	41.7	8.12	7.18	9.46966	8.93561	9.7724	8.79197	9.4102	8.97374	9.59267	8.91567	9.65726	8.97377	REACTOME_POST_TRANSLATIONAL_PROTEIN_MODIFICATION|REACTOME_REGULATION_OF_INSULIN_LIKE_GROWTH_FACTOR_IGF_TRANSPORT_AND_UPTAKE_BY_INSULIN_LIKE_GROWTH_FACTOR_BINDING_PROTEINS_IGFBPS_|REACTOME_RNA_POLYMERASE_II_TRANSCRIPTION|REACTOME_RUNX3_REGULATES_YAP1_MEDIATED_TRANSCRIPTION|REACTOME_TRANSCRIPTIONAL_REGULATION_BY_RUNX3|REACTOME_YAP1_AND_WWTR1_TAZ_STIMULATED_GENE_EXPRESSION
Q8CIH5	1-phosphatidylinositol 4,5-bisphosphate phosphodiesterase gamma-2 OS=Mus musculus OX=10090 GN=Plcg2 PE=1 SV=1	Plcg2	-0.664933	0.00241946	0.0378889	+	0	17.988	5	4	4	4	4	1265	147.5	6.77	15.28	9.93765	9.05809	9.82029	9.00449	9.36153	8.98549	9.47355	8.97924	9.74226	8.98331	REACTOME_ADAPTIVE_IMMUNE_SYSTEM|REACTOME_ANTI_INFLAMMATORY_RESPONSE_FAVOURING_LEISHMANIA_PARASITE_INFECTION|REACTOME_ANTIGEN_ACTIVATES_B_CELL_RECEPTOR_BCR_LEADING_TO_GENERATION_OF_SECOND_MESSENGERS|REACTOME_ANTIVIRAL_MECHANISM_BY_IFN_STIMULATED_GENES|REACTOME_C_TYPE_LECTIN_RECEPTORS_CLRS_|REACTOME_CELL_SURFACE_INTERACTIONS_AT_THE_VASCULAR_WALL|REACTOME_CLEC7A_DECTIN_1_SIGNALING|REACTOME_CONSTITUT…
Q2VLH6	Scavenger receptor cysteine-rich type 1 protein M130 OS=Mus musculus OX=10090 GN=Cd163 PE=1 SV=2	Cd163	-0.66587	0.00332014	0.0420023	+	0	12.657	3	3	4	0	3	1121	120.8	6.24	10.44	9.54194	8.76717	9.68945	8.75389	9.13082	8.7838	9.29622	8.79841	9.61432	8.84012	REACTOME_ANTI_INFLAMMATORY_RESPONSE_FAVOURING_LEISHMANIA_PARASITE_INFECTION|REACTOME_BINDING_AND_UPTAKE_OF_LIGANDS_BY_SCAVENGER_RECEPTORS|REACTOME_CD163_MEDIATING_AN_ANTI_INFLAMMATORY_RESPONSE|REACTOME_DISEASE|REACTOME_INFECTIOUS_DISEASE|REACTOME_LEISHMANIA_INFECTION|REACTOME_SCAVENGING_OF_HEME_FROM_PLASMA|REACTOME_SURFACTANT_METABOLISM|REACTOME_VESICLE_MEDIATED_TRANSPORT
Q6P9Q4	FH1/FH2 domain-containing protein 1 OS=Mus musculus OX=10090 GN=Fhod1 PE=1 SV=3	Fhod1	-0.678189	0.00165284	0.0343896	+	0	54.55	13	13	14	13	13	1197	129.5	6.28	48.02	11.2669	10.9013	11.7528	10.8742	11.6325	10.8757	11.8092	11.0221	11.6743	11.0714	NA
F6ZFP8	Isoform of Q9JLI6, Selenocysteine lyase (Fragment) OS=Mus musculus OX=10090 GN=Scly PE=1 SV=1	Scly	-0.679725	0.00458703	0.0486621	+	0	16.328	12	2	2	0	2	249	27.2	7.21	10.94	9.01675	8.03667	8.91895	8.03242	8.3819	8.03173	8.52612	8.04445	8.82723	8.12706	REACTOME_METABOLISM_OF_AMINO_ACIDS_AND_DERIVATIVES|REACTOME_METABOLISM_OF_INGESTED_SEMET_SEC_MESEC_INTO_H2SE|REACTOME_SELENOAMINO_ACID_METABOLISM
P56382	ATP synthase subunit epsilon, mitochondrial OS=Mus musculus OX=10090 GN=Atp5f1e PE=1 SV=2	Atp5f1e	-0.680409	0.00283776	0.039639	+	0	7.533	42	3	6	3	3	52	5.8	10.01	17.95	11.3944	10.9344	11.6506	10.9785	11.8744	10.9995	12.0061	11.0536	11.5258	11.0832	NA
Q91V98	Endosialin OS=Mus musculus OX=10090 GN=Cd248 PE=1 SV=1	Cd248	-0.703364	0.00390893	0.0451732	+	0.004	3.505	1	1	1	1	1	765	81.8	5.66	2.88	7.55366	6.50753	7.13287	6.47388	6.84653	6.35375	6.70143	6.27456	6.92241	6.03035	NA
Q9CWZ7	Gamma-soluble NSF attachment protein OS=Mus musculus OX=10090 GN=Napg PE=1 SV=1	Napg	-0.710664	8.08523e-05	0.0122502	+	0	25.059	23	6	8	0	6	312	34.7	5.41	29.66	11.0018	10.3954	11.1341	10.4808	11.0923	10.3391	11.2158	10.3605	11.1139	10.4287	REACTOME_ASPARAGINE_N_LINKED_GLYCOSYLATION|REACTOME_COPI_DEPENDENT_GOLGI_TO_ER_RETROGRADE_TRAFFIC|REACTOME_COPI_MEDIATED_ANTEROGRADE_TRANSPORT|REACTOME_COPII_MEDIATED_VESICLE_TRANSPORT|REACTOME_ER_TO_GOLGI_ANTEROGRADE_TRANSPORT|REACTOME_GOLGI_TO_ER_RETROGRADE_TRANSPORT|REACTOME_INTRA_GOLGI_AND_RETROGRADE_GOLGI_TO_ER_TRAFFIC|REACTOME_INTRA_GOLGI_TRAFFIC|REACTOME_MEMBRANE_TRAFFICKING|REACTOME_POST_…
Q3UDT3	Isoform of O35904, Phosphatidylinositol-4,5-bisphosphate 3-kinase OS=Mus musculus OX=10090 GN=Pik3cd PE=1 SV=1	Pik3cd	-0.731907	0.00117283	0.0310773	+	0.001	4.863	1	2	2	0	1	1044	119.8	7.34	5.66	8.87413	7.94523	8.68366	7.82247	8.41364	7.88019	8.46788	7.96421	8.68432	7.85199	REACTOME_ACTIVATED_NTRK2_SIGNALS_THROUGH_PI3K|REACTOME_ACTIVATED_NTRK3_SIGNALS_THROUGH_PI3K|REACTOME_ADAPTIVE_IMMUNE_SYSTEM|REACTOME_ANTIGEN_ACTIVATES_B_CELL_RECEPTOR_BCR_LEADING_TO_GENERATION_OF_SECOND_MESSENGERS|REACTOME_CD28_CO_STIMULATION|REACTOME_CD28_DEPENDENT_PI3K_AKT_SIGNALING|REACTOME_CELL_CELL_COMMUNICATION|REACTOME_CELL_SURFACE_INTERACTIONS_AT_THE_VASCULAR_WALL|REACTOME_CONSTITUTIVE_SI…
G3X8Y8	Isoform of Q9QUN7, Toll-like receptor 2 OS=Mus musculus OX=10090 GN=Tlr2 PE=1 SV=1	Tlr2	-0.734519	0.00212592	0.0367312	+	0.002	3.746	3	2	3	0	2	784	89.4	6.64	4.06	7.85626	7.46794	8.17186	7.49964	7.81328	6.88684	8.2994	7.32889	8.11515	7.40005	REACTOME_ADAPTIVE_IMMUNE_SYSTEM|REACTOME_ANTIGEN_PROCESSING_CROSS_PRESENTATION|REACTOME_ANTIMICROBIAL_PEPTIDES|REACTOME_BETA_DEFENSINS|REACTOME_CLASS_I_MHC_MEDIATED_ANTIGEN_PROCESSING_PRESENTATION|REACTOME_DEFENSINS|REACTOME_DISEASE|REACTOME_DISEASES_OF_IMMUNE_SYSTEM|REACTOME_INFECTION_WITH_MYCOBACTERIUM_TUBERCULOSIS|REACTOME_INFECTIOUS_DISEASE|REACTOME_INNATE_IMMUNE_SYSTEM|REACTOME_IRAK4_DEFICIE…
P62254	Ubiquitin-conjugating enzyme E2 G1 OS=Mus musculus OX=10090 GN=Ube2g1 PE=1 SV=3	Ube2g1	-0.747381	0.000277277	0.0182015	+	0	27.563	36	6	10	4	6	170	19.5	5.3	31.62	11.5416	11.0161	11.83	10.9849	11.7635	11.0269	11.9514	11.067	11.811	11.0657	REACTOME_ADAPTIVE_IMMUNE_SYSTEM|REACTOME_ANTIGEN_PROCESSING_UBIQUITINATION_PROTEASOME_DEGRADATION|REACTOME_CLASS_I_MHC_MEDIATED_ANTIGEN_PROCESSING_PRESENTATION|REACTOME_POST_TRANSLATIONAL_PROTEIN_MODIFICATION|REACTOME_PROTEIN_UBIQUITINATION|REACTOME_SYNTHESIS_OF_ACTIVE_UBIQUITIN_ROLES_OF_E1_AND_E2_ENZYMES
Q9R233	Tapasin OS=Mus musculus OX=10090 GN=Tapbp PE=1 SV=2	Tapbp	-0.761203	0.002582	0.0388989	+	0	45.678	19	7	13	0	7	465	49.7	8.5	43.25	12.4617	11.6412	12.1094	11.2805	11.4155	11.0544	12.0344	11.2989	12.3366	11.2765	REACTOME_ADAPTIVE_IMMUNE_SYSTEM|REACTOME_ANTIGEN_PRESENTATION_FOLDING_ASSEMBLY_AND_PEPTIDE_LOADING_OF_CLASS_I_MHC|REACTOME_ANTIGEN_PROCESSING_CROSS_PRESENTATION|REACTOME_CLASS_I_MHC_MEDIATED_ANTIGEN_PROCESSING_PRESENTATION
Q5EBG6	Heat shock protein beta-6 OS=Mus musculus OX=10090 GN=Hspb6 PE=1 SV=1	Hspb6	-0.76844	0.00219419	0.0373564	+	0	71.505	44	5	67	5	5	162	17.5	6	241.47	14.4096	13.8902	14.6525	13.6954	14.4361	13.8736	14.7013	13.9809	14.4625	13.3797	NA
Q8BX10-2	Isoform of Q8BX10, Isoform 2 of Serine/threonine-protein phosphatase PGAM5, mitochondrial OS=Mus musculus OX=10090 GN=Pgam5 PE=1 SV=1	Pgam5	-0.777426	7.79904e-06	0.00576057	+	0	23.568	21	5	6	1	5	287	31.8	9.04	19.07	10.7862	10.0785	10.8438	10.0094	10.7619	10.0289	10.82	9.98156	10.8961	10.1225	REACTOME_AUTOPHAGY|REACTOME_MITOPHAGY|REACTOME_RECEPTOR_MEDIATED_MITOPHAGY|REACTOME_SELECTIVE_AUTOPHAGY
A3KFX0	Cytosolic 5'-nucleotidase 1A OS=Mus musculus OX=10090 GN=Nt5c1a PE=1 SV=1	Nt5c1a	-0.790756	0.00357988	0.0433839	+	0	15.829	12	3	3	3	3	365	40.7	7.06	13.39	8.66931	8.00679	8.86003	8.10634	9.31504	8.17927	9.20103	8.20066	8.93367	8.53224	REACTOME_METABOLISM_OF_NUCLEOTIDES|REACTOME_NUCLEOBASE_CATABOLISM|REACTOME_PURINE_CATABOLISM|REACTOME_PYRIMIDINE_CATABOLISM
Q78IK4	MICOS complex subunit Mic27 OS=Mus musculus OX=10090 GN=Apool PE=1 SV=1	Apool	-0.793849	0.00215028	0.0370438	+	0	81.701	52	13	30	4	13	265	29.2	9.31	100.15	12.8127	12.43	13.2278	12.3119	13.0609	12.3116	13.4157	12.3743	13.1747	12.2948	REACTOME_CRISTAE_FORMATION|REACTOME_HEMOSTASIS|REACTOME_MITOCHONDRIAL_BIOGENESIS|REACTOME_ORGANELLE_BIOGENESIS_AND_MAINTENANCE|REACTOME_PLATELET_ACTIVATION_SIGNALING_AND_AGGREGATION|REACTOME_RESPONSE_TO_ELEVATED_PLATELET_CYTOSOLIC_CA2_
Q4VAE3	Transmembrane protein 65 OS=Mus musculus OX=10090 GN=Tmem65 PE=1 SV=1	Tmem65	-0.798915	0.002399	0.0378018	+	0	25.396	18	4	12	4	4	234	24.9	7.78	31.95	11.6877	11.1363	12.0847	11.3654	12.3253	11.3302	12.4604	11.3143	11.8703	11.2876	NA
P32020	Sterol carrier protein 2 OS=Mus musculus OX=10090 GN=Scp2 PE=1 SV=3	Scp2	-0.803612	5.88637e-05	0.0116169	+	0	60.372	16	12	25	0	12	547	59.1	7.44	92.08	12.7925	12.0007	12.9837	12.0067	12.6423	11.928	12.9317	12.1577	12.711	11.9501	REACTOME_ALPHA_LINOLENIC_OMEGA3_AND_LINOLEIC_OMEGA6_ACID_METABOLISM|REACTOME_BETA_OXIDATION_OF_PRISTANOYL_COA|REACTOME_BILE_ACID_AND_BILE_SALT_METABOLISM|REACTOME_FATTY_ACID_METABOLISM|REACTOME_METABOLISM_OF_LIPIDS|REACTOME_METABOLISM_OF_STEROIDS|REACTOME_PEROXISOMAL_LIPID_METABOLISM|REACTOME_PEROXISOMAL_PROTEIN_IMPORT|REACTOME_PROTEIN_LOCALIZATION|REACTOME_SYNTHESIS_OF_BILE_ACIDS_AND_BILE_SALTS|…
Q9DB20	ATP synthase subunit O, mitochondrial OS=Mus musculus OX=10090 GN=Atp5po PE=1 SV=1	Atp5po	-0.808045	0.00457596	0.048632	+	0	86.706	61	13	52	0	13	213	23.3	9.99	158.19	14.0852	13.6911	14.4598	13.7555	14.5907	13.555	14.9001	13.7011	14.4024	13.6953	NA
Q8VE91-2	Isoform of Q8VE91, Isoform 2 of Reticulophagy regulator 1 OS=Mus musculus OX=10090 GN=Retreg1 PE=1 SV=2	Retreg1	-0.812919	0.000391208	0.0197577	+	0	20.856	13	4	6	0	4	356	38.9	4.7	21.13	10.2164	9.64067	10.5827	9.56041	10.3222	9.53452	10.4958	9.71764	10.5106	9.60983	NA
P24549	Aldehyde dehydrogenase 1A1 OS=Mus musculus OX=10090 GN=Aldh1a1 PE=1 SV=5	Aldh1a1	-0.817948	0.00360867	0.0433839	+	0	107.25	44	18	28	8	16	501	54.4	7.8	105.34	12.1454	11.5221	12.3591	11.7136	12.8276	11.6112	12.9068	11.8493	12.4779	11.9309	REACTOME_BIOLOGICAL_OXIDATIONS|REACTOME_ETHANOL_OXIDATION|REACTOME_FRUCTOSE_CATABOLISM|REACTOME_FRUCTOSE_METABOLISM|REACTOME_METABOLISM_OF_CARBOHYDRATES|REACTOME_NEURONAL_SYSTEM|REACTOME_NEUROTRANSMITTER_CLEARANCE|REACTOME_PHASE_I_FUNCTIONALIZATION_OF_COMPOUNDS|REACTOME_RA_BIOSYNTHESIS_PATHWAY|REACTOME_SIGNALING_BY_NUCLEAR_RECEPTORS|REACTOME_SIGNALING_BY_RETINOIC_ACID|REACTOME_TRANSMISSION_ACROSS…
Q9WV71	Ankyrin repeat and SOCS box protein 4 OS=Mus musculus OX=10090 GN=Asb4 PE=1 SV=1	Asb4	-0.821072	0.00200424	0.035383	+	0	12.825	9	4	5	3	4	426	48.1	7.52	14.79	10.0648	9.21613	10.2092	9.31835	10.3294	9.25445	10.2504	9.34949	9.80866	9.4187	REACTOME_ADAPTIVE_IMMUNE_SYSTEM|REACTOME_ANTIGEN_PROCESSING_UBIQUITINATION_PROTEASOME_DEGRADATION|REACTOME_CLASS_I_MHC_MEDIATED_ANTIGEN_PROCESSING_PRESENTATION|REACTOME_NEDDYLATION|REACTOME_POST_TRANSLATIONAL_PROTEIN_MODIFICATION
Q99J45	Nuclear receptor-binding protein OS=Mus musculus OX=10090 GN=Nrbp1 PE=1 SV=1	Nrbp1	-0.82812	0.000390885	0.0197577	+	0	19.22	10	4	4	0	4	535	59.8	5.08	17.31	10.235	9.46603	10.3521	9.52463	10.0607	9.43087	10.2269	9.40693	10.3692	9.27485	REACTOME_NUCLEAR_RECEPTOR_TRANSCRIPTION_PATHWAY|REACTOME_RNA_POLYMERASE_II_TRANSCRIPTION
E9PUA7	Isoform of Q62393, Tumor protein D52 OS=Mus musculus OX=10090 GN=Tpd52 PE=1 SV=1	Tpd52	-0.831499	0.00430937	0.0470684	+	0	40.07	36	7	10	0	7	194	21.1	5.03	38.76	11.3687	10.2975	11.3166	10.2694	10.4812	10.1642	10.7222	9.99554	10.9763	9.98068	REACTOME_GOLGI_ASSOCIATED_VESICLE_BIOGENESIS|REACTOME_MEMBRANE_TRAFFICKING|REACTOME_TRANS_GOLGI_NETWORK_VESICLE_BUDDING|REACTOME_VESICLE_MEDIATED_TRANSPORT
P33267	Cytochrome P450 2F2 OS=Mus musculus OX=10090 GN=Cyp2f2 PE=1 SV=1	Cyp2f2	-0.832772	0.00141681	0.0321997	+	0	10.09	7	2	2	2	2	491	55.9	7.9	8.06	8.07966	6.8419	7.62113	6.84796	7.3628	6.61107	7.52861	6.91609	7.42948	6.6408	REACTOME_BIOLOGICAL_OXIDATIONS|REACTOME_CYP2E1_REACTIONS|REACTOME_CYTOCHROME_P450_ARRANGED_BY_SUBSTRATE_TYPE|REACTOME_FATTY_ACIDS|REACTOME_PHASE_I_FUNCTIONALIZATION_OF_COMPOUNDS|REACTOME_XENOBIOTICS
Q9Z2G9	Oxidoreductase HTATIP2 OS=Mus musculus OX=10090 GN=Htatip2 PE=1 SV=3	Htatip2	-0.840747	0.00229219	0.0375196	+	0.001	6.936	7	2	2	0	2	242	26.9	8.59	6.1	9.97822	8.94888	9.90636	8.82068	9.44064	8.99792	9.42541	8.74535	9.71024	8.74431	NA
P47738	Aldehyde dehydrogenase, mitochondrial OS=Mus musculus OX=10090 GN=Aldh2 PE=1 SV=1	Aldh2	-0.847776	0.00265622	0.0391411	+	0	133.854	51	22	51	0	19	519	56.5	7.62	195.68	13.6205	13.2247	14.041	13.0545	13.79	13.0212	14.0846	13.1362	14.0259	12.8864	REACTOME_BIOLOGICAL_OXIDATIONS|REACTOME_ETHANOL_OXIDATION|REACTOME_FRUCTOSE_CATABOLISM|REACTOME_FRUCTOSE_METABOLISM|REACTOME_METABOLISM_OF_CARBOHYDRATES|REACTOME_NEURONAL_SYSTEM|REACTOME_NEUROTRANSMITTER_CLEARANCE|REACTOME_PHASE_I_FUNCTIONALIZATION_OF_COMPOUNDS|REACTOME_RA_BIOSYNTHESIS_PATHWAY|REACTOME_SIGNALING_BY_NUCLEAR_RECEPTORS|REACTOME_SIGNALING_BY_RETINOIC_ACID|REACTOME_TRANSMISSION_ACROSS…
Q91YS8	Calcium/calmodulin-dependent protein kinase type 1 OS=Mus musculus OX=10090 GN=Camk1 PE=1 SV=1	Camk1	-0.849769	0.000267683	0.0180699	+	0	53.138	31	9	14	4	7	374	41.6	5.35	54.15	11.5047	10.803	11.7591	10.7209	11.4181	10.72	11.5898	10.7621	11.7352	10.7521	REACTOME_ACTIVATION_OF_NMDA_RECEPTORS_AND_POSTSYNAPTIC_EVENTS|REACTOME_ACTIVATION_OF_RAC1_DOWNSTREAM_OF_NMDARS|REACTOME_NEGATIVE_REGULATION_OF_NMDA_RECEPTOR_MEDIATED_NEURONAL_TRANSMISSION|REACTOME_NEURONAL_SYSTEM|REACTOME_NEUROTRANSMITTER_RECEPTORS_AND_POSTSYNAPTIC_SIGNAL_TRANSMISSION|REACTOME_TRANSMISSION_ACROSS_CHEMICAL_SYNAPSES
Q3UQV5	Kelch repeat and BTB domain-containing protein 8 OS=Mus musculus OX=10090 GN=Kbtbd8 PE=2 SV=1	Kbtbd8	-0.86981	0.000443739	0.0213175	+	0.003	3.66	2	1	1	0	1	599	68.6	6.25	3.11	6.79872	5.82974	6.81274	5.88621	6.77132	5.90594	6.8971	5.86913	6.61492	6.05474	REACTOME_ADAPTIVE_IMMUNE_SYSTEM|REACTOME_ANTIGEN_PROCESSING_UBIQUITINATION_PROTEASOME_DEGRADATION|REACTOME_CLASS_I_MHC_MEDIATED_ANTIGEN_PROCESSING_PRESENTATION|REACTOME_NEDDYLATION|REACTOME_POST_TRANSLATIONAL_PROTEIN_MODIFICATION
O08689	Growth/differentiation factor 8 OS=Mus musculus OX=10090 GN=Mstn PE=1 SV=1	Mstn	-0.877073	0.0010745	0.0292817	+	0.001	9.155	8	3	4	2	3	376	42.9	7.01	6.22	9.33082	8.64647	9.691	8.61526	9.60462	8.6517	9.8173	8.7264	9.28444	8.70297	REACTOME_FOXO_MEDIATED_TRANSCRIPTION|REACTOME_FOXO_MEDIATED_TRANSCRIPTION_OF_CELL_CYCLE_GENES|REACTOME_RNA_POLYMERASE_II_TRANSCRIPTION
Q9DBJ1	Phosphoglycerate mutase 1 OS=Mus musculus OX=10090 GN=Pgam1 PE=1 SV=3	Pgam1	-0.877644	0.000997558	0.028976	+	0	109.394	62	14	105	8	8	254	28.8	7.18	327.52	12.8165	12.0073	12.8719	11.8977	12.2277	11.668	12.5919	11.728	12.77	11.5886	REACTOME_GLUCONEOGENESIS|REACTOME_GLUCOSE_METABOLISM|REACTOME_GLYCOLYSIS|REACTOME_INNATE_IMMUNE_SYSTEM|REACTOME_METABOLISM_OF_CARBOHYDRATES|REACTOME_NEUTROPHIL_DEGRANULATION
Q8JZU0	NAD(P)H pyrophosphatase NUDT13, mitochondrial OS=Mus musculus OX=10090 GN=Nudt13 PE=1 SV=2	Nudt13	-0.877757	0.0011201	0.0300849	+	0.001	5.562	6	3	4	0	3	352	39.1	8.02	10.18	10.1031	9.11682	10.1315	9.20304	10.1296	9.42649	10.5261	9.34431	10.0336	9.4444	REACTOME_INTERCONVERSION_OF_NUCLEOTIDE_DI_AND_TRIPHOSPHATES|REACTOME_METABOLISM_OF_NUCLEOTIDES
Q9QYJ0	DnaJ homolog subfamily A member 2 OS=Mus musculus OX=10090 GN=Dnaja2 PE=1 SV=1	Dnaja2	-0.880216	0.00100036	0.028976	+	0	68.442	39	14	33	14	14	412	45.7	6.48	80.84	12.9993	12.4996	13.3013	12.4028	13.2193	12.3103	13.4463	12.3381	13.3084	12.3227	REACTOME_CELLULAR_RESPONSES_TO_EXTERNAL_STIMULI|REACTOME_HSP90_CHAPERONE_CYCLE_FOR_STEROID_HORMONE_RECEPTORS_SHR_
P97372	Proteasome activator complex subunit 2 OS=Mus musculus OX=10090 GN=Psme2 PE=1 SV=4	Psme2	-0.911969	0.00151183	0.0330866	+	0	65.918	48	12	23	0	11	239	27	5.76	67.83	12.7917	11.7996	12.5094	11.6423	11.7542	11.2779	12.483	11.3829	12.5935	11.4692	REACTOME_ABC_FAMILY_PROTEINS_MEDIATED_TRANSPORT|REACTOME_ABC_TRANSPORTER_DISORDERS|REACTOME_ADAPTIVE_IMMUNE_SYSTEM|REACTOME_ANTIGEN_PROCESSING_CROSS_PRESENTATION|REACTOME_ANTIGEN_PROCESSING_UBIQUITINATION_PROTEASOME_DEGRADATION|REACTOME_APC_C_CDH1_MEDIATED_DEGRADATION_OF_CDC20_AND_OTHER_APC_C_CDH1_TARGETED_PROTEINS_IN_LATE_MITOSIS_EARLY_G1|REACTOME_APC_C_MEDIATED_DEGRADATION_OF_CELL_CYCLE_PROTEIN…
P01901	H-2 class I histocompatibility antigen, K-B alpha chain OS=Mus musculus OX=10090 GN=H2-K1 PE=1 SV=1	H2-K1	-0.913879	0.00407395	0.0461168	+	0	54.301	35	10	19	0	7	369	41.3	6.39	53.98	11.5506	10.1852	10.8787	9.99859	10.344	9.91219	10.6737	9.86347	11.1094	10.0276	REACTOME_ADAPTIVE_IMMUNE_SYSTEM|REACTOME_ANTIGEN_PRESENTATION_FOLDING_ASSEMBLY_AND_PEPTIDE_LOADING_OF_CLASS_I_MHC|REACTOME_ANTIGEN_PROCESSING_CROSS_PRESENTATION|REACTOME_CLASS_I_MHC_MEDIATED_ANTIGEN_PROCESSING_PRESENTATION|REACTOME_CYTOKINE_SIGNALING_IN_IMMUNE_SYSTEM|REACTOME_DAP12_INTERACTIONS|REACTOME_DAP12_SIGNALING|REACTOME_DISEASE|REACTOME_E3_UBIQUITIN_LIGASES_UBIQUITINATE_TARGET_PROTEINS|RE…
Q9Z1M2	Isoform of A0A140LIF8, Immunity-related GTPase family M member 2 OS=Mus musculus OX=10090 GN=Irgm2 PE=1 SV=1	Irgm2	-0.919288	0.00125923	0.0317983	+	0	73.151	34	9	15	0	6	395	45.2	6.96	59.13	11.4751	10.5542	11.0941	10.1974	10.6464	10.1024	11.1329	10.1521	11.4618	10.2077	NA
Q91Z40	Guanylate-binding protein 7 OS=Mus musculus OX=10090 GN=Gbp7 PE=1 SV=2	Gbp7	-0.92053	0.00438251	0.047429	+	0	69.049	23	12	19	10	10	638	72.7	6.33	61.94	11.8931	11.0946	11.6125	10.8443	10.9998	10.5265	11.989	10.66	11.9223	10.6886	REACTOME_CYTOKINE_SIGNALING_IN_IMMUNE_SYSTEM|REACTOME_INTERFERON_ALPHA_BETA_SIGNALING|REACTOME_INTERFERON_GAMMA_SIGNALING|REACTOME_INTERFERON_SIGNALING
P36371	Antigen peptide transporter 2 OS=Mus musculus OX=10090 GN=Tap2 PE=1 SV=1	Tap2	-0.929243	0.00313955	0.0411343	+	0	54.424	19	12	15	12	12	702	77.4	7.24	52.54	12.0059	11.0255	11.7315	10.6743	10.9819	10.5891	11.5905	10.6512	11.9126	10.6362	REACTOME_ABC_FAMILY_PROTEINS_MEDIATED_TRANSPORT|REACTOME_ADAPTIVE_IMMUNE_SYSTEM|REACTOME_ANTIGEN_PRESENTATION_FOLDING_ASSEMBLY_AND_PEPTIDE_LOADING_OF_CLASS_I_MHC|REACTOME_ANTIGEN_PROCESSING_CROSS_PRESENTATION|REACTOME_CLASS_I_MHC_MEDIATED_ANTIGEN_PROCESSING_PRESENTATION|REACTOME_TRANSPORT_OF_SMALL_MOLECULES
Q9D3D9	ATP synthase subunit delta, mitochondrial OS=Mus musculus OX=10090 GN=Atp5f1d PE=1 SV=1	Atp5f1d	-0.947057	0.00100945	0.0289937	+	0	15.704	17	3	10	2	2	168	17.6	5.08	35.47	11.7703	11.1131	12.0839	11.1511	12.2299	11.1418	12.3952	11.1159	12.0224	11.2446	NA
Q9ESU7	Isoform of P51912, Amino acid transporter OS=Mus musculus OX=10090 GN=Slc1a5 PE=1 SV=1	Slc1a5	-0.953859	0.000665991	0.0241706	+	0.001	6.464	2	1	1	1	1	555	58.4	7.12	3.82	6.76911	5.46022	6.60232	5.57291	6.44595	5.58289	6.34153	5.53587	6.47216	5.7099	REACTOME_AMINO_ACID_TRANSPORT_ACROSS_THE_PLASMA_MEMBRANE|REACTOME_SLC_MEDIATED_TRANSMEMBRANE_TRANSPORT|REACTOME_TRANSPORT_OF_INORGANIC_CATIONS_ANIONS_AND_AMINO_ACIDS_OLIGOPEPTIDES|REACTOME_TRANSPORT_OF_SMALL_MOLECULES
P53986	Monocarboxylate transporter 1 OS=Mus musculus OX=10090 GN=Slc16a1 PE=1 SV=1	Slc16a1	-0.961685	6.4877e-05	0.0116169	+	0	29.322	8	4	8	4	4	493	53.2	7.47	27.27	10.6083	9.53782	10.4951	9.58829	10.5134	9.45446	10.623	9.62331	10.3243	9.55175	REACTOME_BASIGIN_INTERACTIONS|REACTOME_CELL_SURFACE_INTERACTIONS_AT_THE_VASCULAR_WALL|REACTOME_DISEASE|REACTOME_DISORDERS_OF_TRANSMEMBRANE_TRANSPORTERS|REACTOME_HEMOSTASIS|REACTOME_PROTON_COUPLED_MONOCARBOXYLATE_TRANSPORT|REACTOME_PYRUVATE_METABOLISM|REACTOME_PYRUVATE_METABOLISM_AND_CITRIC_ACID_TCA_CYCLE|REACTOME_SLC_MEDIATED_TRANSMEMBRANE_TRANSPORT|REACTOME_SLC_TRANSPORTER_DISORDERS|REACTOME_THE…
P97371	Proteasome activator complex subunit 1 OS=Mus musculus OX=10090 GN=Psme1 PE=1 SV=2	Psme1	-0.967638	0.00313669	0.0411343	+	0	81.054	67	17	41	0	16	249	28.7	5.97	121.45	14.033	13.1706	13.8428	12.8117	12.9019	12.4651	13.8378	12.6188	13.805	12.5162	REACTOME_ABC_FAMILY_PROTEINS_MEDIATED_TRANSPORT|REACTOME_ABC_TRANSPORTER_DISORDERS|REACTOME_ADAPTIVE_IMMUNE_SYSTEM|REACTOME_ANTIGEN_PROCESSING_CROSS_PRESENTATION|REACTOME_ANTIGEN_PROCESSING_UBIQUITINATION_PROTEASOME_DEGRADATION|REACTOME_APC_C_CDH1_MEDIATED_DEGRADATION_OF_CDC20_AND_OTHER_APC_C_CDH1_TARGETED_PROTEINS_IN_LATE_MITOSIS_EARLY_G1|REACTOME_APC_C_MEDIATED_DEGRADATION_OF_CELL_CYCLE_PROTEIN…
Q91XE4	N-acyl-aromatic-L-amino acid amidohydrolase (carboxylate-forming) OS=Mus musculus OX=10090 GN=Acy3 PE=1 SV=1	Acy3	-0.983549	0.00397599	0.0453555	+	0	15.427	17	4	4	3	4	318	35.3	5.5	15.34	9.86817	8.50897	9.87243	8.48346	9.4212	8.54418	9.64046	9.00213	9.93076	9.27653	REACTOME_AFLATOXIN_ACTIVATION_AND_DETOXIFICATION|REACTOME_BIOLOGICAL_OXIDATIONS
E9Q8M6	Isoform of Q61179, Interferon regulatory factor 9 OS=Mus musculus OX=10090 GN=Irf9 PE=1 SV=1	Irf9	-0.995073	0.0022846	0.0374991	+	0.025	1.587	1	1	1	0	1	417	46.8	6.87	2.86	8.80354	7.31307	8.3499	7.326	7.79057	7.11199	7.76006	7.01913	8.28977	7.24828	REACTOME_CYTOKINE_SIGNALING_IN_IMMUNE_SYSTEM|REACTOME_INTERFERON_ALPHA_BETA_SIGNALING|REACTOME_INTERFERON_GAMMA_SIGNALING|REACTOME_INTERFERON_SIGNALING
Q8CGN5	Perilipin-1 OS=Mus musculus OX=10090 GN=Plin1 PE=1 SV=2	Plin1	-0.998802	0.000565013	0.0236206	+	0	22.417	10	4	4	1	4	517	55.6	7.01	16.49	9.2793	8.19528	9.06157	8.13859	8.80938	7.76	8.92345	8.25689	8.98503	7.71398	REACTOME_DEVELOPMENTAL_BIOLOGY|REACTOME_METABOLISM_OF_LIPIDS|REACTOME_NR1H2_AND_NR1H3_MEDIATED_SIGNALING|REACTOME_NR1H2_NR1H3_REGULATE_GENE_EXPRESSION_LINKED_TO_TRIGLYCERIDE_LIPOLYSIS_IN_ADIPOSE|REACTOME_SIGNALING_BY_NUCLEAR_RECEPTORS|REACTOME_TRANSCRIPTIONAL_REGULATION_OF_WHITE_ADIPOCYTE_DIFFERENTIATION|REACTOME_TRIGLYCERIDE_CATABOLISM|REACTOME_TRIGLYCERIDE_METABOLISM
Q91ZJ5	UTP--glucose-1-phosphate uridylyltransferase OS=Mus musculus OX=10090 GN=Ugp2 PE=1 SV=3	Ugp2	-1.01854	0.00296876	0.0398425	+	0	262.474	68	35	164	2	35	508	56.9	7.61	575.61	15.1675	14.7481	15.8366	14.6505	15.5526	14.4972	16.1071	14.7649	15.5931	14.5036	REACTOME_BIOLOGICAL_OXIDATIONS|REACTOME_GLUCURONIDATION|REACTOME_GLYCOGEN_METABOLISM|REACTOME_GLYCOGEN_SYNTHESIS|REACTOME_METABOLISM_OF_CARBOHYDRATES|REACTOME_PHASE_II_CONJUGATION_OF_COMPOUNDS
Q61878	Bone marrow proteoglycan OS=Mus musculus OX=10090 GN=Prg2 PE=1 SV=1	Prg2	-1.02607	0.00148171	0.0327918	+	0	11.64	11	3	7	3	3	223	24.2	6.2	20.39	12.232	11.2287	12.3218	11.1187	11.5197	10.5951	11.5225	10.9137	11.6434	10.2528	REACTOME_INNATE_IMMUNE_SYSTEM|REACTOME_NEUTROPHIL_DEGRANULATION
P62774	Myotrophin OS=Mus musculus OX=10090 GN=Mtpn PE=1 SV=2	Mtpn	-1.0381	0.00136531	0.0320198	+	0	17.204	35	4	5	2	4	118	12.9	5.52	16.25	11.0143	9.93333	10.9892	9.87834	10.363	9.7806	10.6327	9.61126	10.7466	9.35187	NA
Q9CPQ8	ATP synthase subunit g, mitochondrial OS=Mus musculus OX=10090 GN=Atp5mg PE=1 SV=1	Atp5mg	-1.04218	0.00448948	0.0481458	+	0	17.89	34	4	16	3	3	103	11.4	9.74	41.31	11.4214	10.556	11.7142	10.9183	12.1139	10.6828	12.2361	10.7243	11.4898	10.883	NA
Q9EPA7	Nicotinamide/nicotinic acid mononucleotide adenylyltransferase 1 OS=Mus musculus OX=10090 GN=Nmnat1 PE=1 SV=2	Nmnat1	-1.07726	1.8698e-05	0.0084688	+	0	11.858	15	4	5	2	4	285	32.3	9	15.14	10.4767	9.34414	10.5275	9.3216	10.3477	9.3326	10.5728	9.48452	10.467	9.5225	REACTOME_METABOLISM_OF_VITAMINS_AND_COFACTORS|REACTOME_METABOLISM_OF_WATER_SOLUBLE_VITAMINS_AND_COFACTORS|REACTOME_NICOTINATE_METABOLISM
Q78IK2	ATP synthase membrane subunit K, mitochondrial OS=Mus musculus OX=10090 GN=Atp5mk PE=1 SV=1	Atp5mk	-1.07788	0.00281369	0.039639	+	0.001	4.108	17	1	2	1	1	58	6.4	9.83	6.76	8.43089	7.06719	8.47424	7.69555	9.04186	7.69716	8.83425	7.51731	8.38104	7.79566	NA
F6YY19	Isoform of P58501, PAX3- and PAX7-binding protein 1 (Fragment) OS=Mus musculus OX=10090 GN=Paxbp1 PE=1 SV=1	Paxbp1	-1.13107	0.00161643	0.0342347	+	0.04	1.303	1	1	1	0	1	450	50.7	5.4	2.12	7.53689	6.04706	7.34453	6.65598	7.53025	6.33883	7.5641	6.18081	7.33816	6.43593	NA
Q9DCE9	Interferon gamma-induced GTPase OS=Mus musculus OX=10090 GN=Igtp PE=1 SV=1	Igtp	-1.21652	0.00390945	0.0451732	+	0	106.084	46	16	39	11	13	423	48.5	7.77	147.18	13.3782	12.4971	13.1339	12.0461	12.4031	11.6615	13.5772	11.7692	13.3355	11.7715	NA
Q3TBA3	Isoform of P21958, Antigen peptide transporter 1 OS=Mus musculus OX=10090 GN=Tap1 PE=1 SV=1	Tap1	-1.24993	0.0034316	0.0423455	+	0	30.837	10	6	9	0	6	696	75.9	8.7	33.2	11.7616	10.4322	11.3629	10.0791	10.2787	9.75915	11.1392	9.78088	11.5947	9.83603	REACTOME_ADAPTIVE_IMMUNE_SYSTEM|REACTOME_ANTIGEN_PRESENTATION_FOLDING_ASSEMBLY_AND_PEPTIDE_LOADING_OF_CLASS_I_MHC|REACTOME_ANTIGEN_PROCESSING_CROSS_PRESENTATION|REACTOME_CLASS_I_MHC_MEDIATED_ANTIGEN_PROCESSING_PRESENTATION
Q3T9E4	T-cell-specific guanine nucleotide triphosphate-binding protein 2 OS=Mus musculus OX=10090 GN=Tgtp2 PE=1 SV=2	Tgtp2	-1.32949	0.00341528	0.0423455	+	0	43.835	20	8	9	7	8	415	47.1	5.74	33.24	12.005	10.4742	11.2652	10.0996	10.4935	9.92301	11.6563	10.0429	11.8084	10.0411	NA
Q9CR09	Ubiquitin-fold modifier-conjugating enzyme 1 OS=Mus musculus OX=10090 GN=Ufc1 PE=1 SV=1	Ufc1	-1.40896	6.96122e-06	0.00576057	+	0	12.944	20	4	6	1	4	167	19.5	7.4	18.93	10.9843	9.58416	10.9005	9.6675	11.0567	9.57086	10.9547	9.50085	11.0207	9.54882	NA
Q3U2V3	8-oxo-dGDP phosphatase NUDT18 OS=Mus musculus OX=10090 GN=Nudt18 PE=1 SV=1	Nudt18	-1.46425	0.000272165	0.0180699	+	0.001	5.443	4	1	1	0	1	323	35.7	6.62	3.72	7.72799	6.05584	7.69257	6.30949	7.57694	6.33382	7.71879	5.89729	7.4268	6.22539	REACTOME_METABOLISM_OF_NUCLEOTIDES|REACTOME_NUCLEOBASE_CATABOLISM|REACTOME_PHOSPHATE_BOND_HYDROLYSIS_BY_NUDT_PROTEINS|REACTOME_PURINE_CATABOLISM
O35955	Proteasome subunit beta type-10 OS=Mus musculus OX=10090 GN=Psmb10 PE=1 SV=1	Psmb10	-1.55223	0.00332663	0.0420023	+	0	15.027	21	5	7	5	5	273	29	6.87	18.27	11.5676	9.56926	11.0004	9.26986	9.76506	9.17518	10.8452	9.21531	11.0983	9.28591	REACTOME_ABC_FAMILY_PROTEINS_MEDIATED_TRANSPORT|REACTOME_ABC_TRANSPORTER_DISORDERS|REACTOME_ADAPTIVE_IMMUNE_SYSTEM|REACTOME_ANTIGEN_PROCESSING_CROSS_PRESENTATION|REACTOME_ANTIGEN_PROCESSING_UBIQUITINATION_PROTEASOME_DEGRADATION|REACTOME_APC_C_CDH1_MEDIATED_DEGRADATION_OF_CDC20_AND_OTHER_APC_C_CDH1_TARGETED_PROTEINS_IN_LATE_MITOSIS_EARLY_G1|REACTOME_APC_C_MEDIATED_DEGRADATION_OF_CELL_CYCLE_PROTEIN…
Q9QZ85	Interferon-inducible GTPase 1 OS=Mus musculus OX=10090 GN=Iigp1 PE=1 SV=2	Iigp1	-1.59429	0.0017459	0.0347358	+	0	95.235	47	18	32	14	17	413	47.5	6.33	108.46	13.5437	12.0336	13.0966	11.5662	12.3188	11.4327	13.4837	11.6021	13.6961	11.5328	NA
F8VQB6	Unconventional myosin-X OS=Mus musculus OX=10090 GN=Myo10 PE=1 SV=1	Myo10	1.16353	0.0747328	0.183387		0	12.943	2	4	6	0	4	2062	237.2	6.25	16	9.44018	11.3609	9.56671	12.2441	10.4444	10.7354	10.1894	10.4144	10.7777	11.4812	REACTOME_DEVELOPMENTAL_BIOLOGY|REACTOME_DISEASE|REACTOME_FCGAMMA_RECEPTOR_FCGR_DEPENDENT_PHAGOCYTOSIS|REACTOME_G_ALPHA_I_SIGNALLING_EVENTS|REACTOME_INFECTIOUS_DISEASE|REACTOME_INNATE_IMMUNE_SYSTEM|REACTOME_LEISHMANIA_INFECTION|REACTOME_NERVOUS_SYSTEM_DEVELOPMENT|REACTOME_NETRIN_1_SIGNALING|REACTOME_PARASITE_INFECTION|REACTOME_SIGNALING_BY_GPCR|REACTOME_THE_CANONICAL_RETINOID_CYCLE_IN_RODS_TWILIGH…
Q60698	Ski oncogene OS=Mus musculus OX=10090 GN=Ski PE=1 SV=2	Ski	1.16117	0.164898	0.298433		0.009	2.564	1	1	2	0	1	725	80.1	7.85	5.91	8.0716	7.9333	7.94339	8.21756	8.30994	8.36254	8.40873	10.8791	7.96954	11.1165	REACTOME_DOWNREGULATION_OF_SMAD2_3_SMAD4_TRANSCRIPTIONAL_ACTIVITY|REACTOME_RNA_POLYMERASE_II_TRANSCRIPTION|REACTOME_SIGNALING_BY_BMP|REACTOME_SIGNALING_BY_TGF_BETA_RECEPTOR_COMPLEX|REACTOME_SIGNALING_BY_TGFB_FAMILY_MEMBERS|REACTOME_TRANSCRIPTIONAL_ACTIVITY_OF_SMAD2_SMAD3_SMAD4_HETEROTRIMER
E0CYX9	Isoform of Q3TC33, Coiled-coil domain-containing protein 127 (Fragment) OS=Mus musculus OX=10090 GN=Ccdc127 PE=1 SV=1	Ccdc127	1.13879	0.024667	0.1008		0.048	1.234	3	1	1	0	1	238	27.7	8.76	3.35	9.68616	11.0121	9.54475	11.6988	10.5311	10.7999	10.1711	10.8067	9.97201	11.2814	NA
Q9WUB0	RanBP-type and C3HC4-type zinc finger-containing protein 1 OS=Mus musculus OX=10090 GN=Rbck1 PE=1 SV=2	Rbck1	1.11949	0.020086	0.0908098		0.006	2.771	4	2	3	2	2	508	57.5	6.19	5.81	10.5798	12.8764	11.4535	12.3892	11.1471	11.8225	11.4909	12.4423	11.3567	12.0951	REACTOME_ADAPTIVE_IMMUNE_SYSTEM|REACTOME_ANTIGEN_PROCESSING_UBIQUITINATION_PROTEASOME_DEGRADATION|REACTOME_CLASS_I_MHC_MEDIATED_ANTIGEN_PROCESSING_PRESENTATION|REACTOME_DEATH_RECEPTOR_SIGNALLING|REACTOME_REGULATION_OF_TNFR1_SIGNALING|REACTOME_TNF_SIGNALING|REACTOME_TNFR1_INDUCED_NFKAPPAB_SIGNALING_PATHWAY
Q61414	Keratin, type I cytoskeletal 15 OS=Mus musculus OX=10090 GN=Krt15 PE=1 SV=2	Krt15	1.10671	0.0697671	0.176448		0	34.527	8	7	19	0	4	452	49.1	4.86	48.46	10.5875	12.1209	11.1875	13.7906	11.031	11.309	10.9816	11.126	12.0121	12.9867	REACTOME_DEVELOPMENTAL_BIOLOGY|REACTOME_FORMATION_OF_THE_CORNIFIED_ENVELOPE|REACTOME_KERATINIZATION
Q8CHS7	Dehydrogenase/reductase SDR family member 7C OS=Mus musculus OX=10090 GN=Dhrs7c PE=1 SV=3	Dhrs7c	1.05016	0.0067884	0.0572711		0	115.321	48	15	44	15	15	311	34.4	8.6	141.2	12.0782	13.7785	12.6266	13.7345	13.2333	13.7258	13.2267	13.9939	12.6117	13.7946	NA
F6X9B6	Isoform of A0A571BF58, Nebulin (Fragment) OS=Mus musculus OX=10090 GN=Neb PE=1 SV=1	Neb	1.00457	0.0508366	0.147904		0	523.587	74	62	378	3	3	768	87.6	9.22	1220.75	9.68974	11.7778	10.4572	11.6766	11.3863	11.4367	11.224	11.5773	10.4886	11.8002	REACTOME_MUSCLE_CONTRACTION|REACTOME_STRIATED_MUSCLE_CONTRACTION
Q9DCC1	Isoform of O55236, mRNA-capping enzyme OS=Mus musculus OX=10090 GN=Rngtt PE=1 SV=1	Rngtt	1.00055	0.0828033	0.194315		0.014	2.303	2	1	4	0	1	581	66.8	8.22	7.04	8.62618	10.7008	9.30091	10.9123	10.4538	10.2827	10.2957	10.4278	9.76857	11.1243	REACTOME_DISEASE|REACTOME_HIV_INFECTION|REACTOME_HIV_LIFE_CYCLE|REACTOME_INFECTIOUS_DISEASE|REACTOME_METABOLISM_OF_RNA|REACTOME_MRNA_CAPPING|REACTOME_RNA_POLYMERASE_II_TRANSCRIPTION|REACTOME_TRANSCRIPTION_OF_THE_HIV_GENOME
Q9QXX8	Nuclear fragile X mental retardation-interacting protein 1 OS=Mus musculus OX=10090 GN=Nufip1 PE=1 SV=1	Nufip1	0.967943	0.133623	0.259388		0.046	1.258	1	1	1	1	1	484	54.7	9.47	2.87	8.35245	10.1266	8.52584	11.109	9.33	9.44658	8.8618	8.82347	9.33976	9.74393	NA
A2A513	Isoform of P02535, Keratin, type I cytoskeletal 10 OS=Mus musculus OX=10090 GN=Krt10 PE=1 SV=1	Krt10	0.91981	0.0510321	0.148244		0	46.576	14	10	19	0	7	561	57	5.07	63.18	11.4459	12.3511	11.7169	13.791	11.4836	11.8599	11.7054	11.8682	12.4257	13.5062	REACTOME_DEVELOPMENTAL_BIOLOGY|REACTOME_FORMATION_OF_THE_CORNIFIED_ENVELOPE|REACTOME_KERATINIZATION
Q9WV35	C->U-editing enzyme APOBEC-2 OS=Mus musculus OX=10090 GN=Apobec2 PE=1 SV=1	Apobec2	0.917257	0.00985078	0.0657168		0	59.354	70	10	28	10	10	224	25.6	4.79	93.49	11.7975	13.4019	12.2075	13.1898	12.8217	13.2547	12.8757	13.5172	12.2654	13.1906	REACTOME_METABOLISM_OF_RNA|REACTOME_MRNA_EDITING|REACTOME_MRNA_EDITING_C_TO_U_CONVERSION
E9QJU4	Isoform of Q8R4E4, Myozenin-3 OS=Mus musculus OX=10090 GN=Myoz3 PE=1 SV=1	Myoz3	0.917025	0.0189386	0.0890982		0	63.661	47	11	32	0	11	245	27	8.95	94.95	11.7356	13.4344	12.3284	13.3275	12.9743	13.2209	12.8639	13.494	12.2667	13.2773	NA
Q6P3Z3	Peroxynitrite isomerase THAP4 OS=Mus musculus OX=10090 GN=Thap4 PE=1 SV=1	Thap4	0.913353	0.0360974	0.122094		0.001	6.616	5	2	2	0	2	569	62.5	9.1	6.67	7.5796	8.90283	7.93758	9.27398	9.00055	8.95977	8.77524	9.26573	8.20979	9.66722	NA
Q922U2	Keratin, type II cytoskeletal 5 OS=Mus musculus OX=10090 GN=Krt5 PE=1 SV=1	Krt5	0.911077	0.137567	0.26418		0	88.601	15	17	33	6	6	580	61.7	7.75	102.4	11.9639	13.5366	12.0572	14.3477	12.361	12.1616	12.5184	12.32	13.632	14.7219	REACTOME_CELL_CELL_COMMUNICATION|REACTOME_CELL_JUNCTION_ORGANIZATION|REACTOME_DEVELOPMENTAL_BIOLOGY|REACTOME_FORMATION_OF_THE_CORNIFIED_ENVELOPE|REACTOME_KERATINIZATION|REACTOME_TYPE_I_HEMIDESMOSOME_ASSEMBLY
Q02357-7	Isoform of Q02357, Isoform Mu7 of Ankyrin-1 OS=Mus musculus OX=10090 GN=Ank1 PE=1 SV=2	Ank1	0.910489	0.00636234	0.0555579		0	33.358	64	7	16	0	4	155	17.5	6.55	67.58	9.31812	10.7541	9.73412	10.6745	10.3033	10.7026	10.2665	10.9736	9.63022	10.6999	REACTOME_ASPARAGINE_N_LINKED_GLYCOSYLATION|REACTOME_CHL1_INTERACTIONS|REACTOME_COPI_MEDIATED_ANTEROGRADE_TRANSPORT|REACTOME_DEVELOPMENTAL_BIOLOGY|REACTOME_ER_TO_GOLGI_ANTEROGRADE_TRANSPORT|REACTOME_INTERACTION_BETWEEN_L1_AND_ANKYRINS|REACTOME_L1CAM_INTERACTIONS|REACTOME_MEMBRANE_TRAFFICKING|REACTOME_NERVOUS_SYSTEM_DEVELOPMENT|REACTOME_NEUROFASCIN_INTERACTIONS|REACTOME_NRCAM_INTERACTIONS|REACTOME_…
P32848	Parvalbumin alpha OS=Mus musculus OX=10090 GN=Pvalb PE=1 SV=3	Pvalb	0.901396	0.0661008	0.171145		0	344.241	100	37	1033	37	37	110	11.9	5.19	2840.76	16.8818	19.1896	17.8751	18.675	17.8462	18.4381	18.4029	18.8326	18.0099	18.3876	REACTOME_RNA_POLYMERASE_II_TRANSCRIPTION|REACTOME_TRANSCRIPTIONAL_REGULATION_BY_MECP2
Q5SX39	Myosin-4 OS=Mus musculus OX=10090 GN=Myh4 PE=1 SV=1	Myh4	0.900604	0.102815	0.22068		0	4006.45	85	357	8618	97	97	1939	222.7	5.74	28669.8	19.3337	21.8237	20.3516	21.4259	20.6694	20.8776	21.2337	21.4497	20.6058	21.1203	REACTOME_ANTI_INFLAMMATORY_RESPONSE_FAVOURING_LEISHMANIA_PARASITE_INFECTION|REACTOME_CD163_MEDIATING_AN_ANTI_INFLAMMATORY_RESPONSE|REACTOME_DEVELOPMENTAL_BIOLOGY|REACTOME_DISEASE|REACTOME_EPH_EPHRIN_SIGNALING|REACTOME_EPHA_MEDIATED_GROWTH_CONE_COLLAPSE|REACTOME_FCGAMMA_RECEPTOR_FCGR_DEPENDENT_PHAGOCYTOSIS|REACTOME_INFECTIOUS_DISEASE|REACTOME_INNATE_IMMUNE_SYSTEM|REACTOME_LEISHMANIA_INFECTION|REAC…
Q3TJD7	PDZ and LIM domain protein 7 OS=Mus musculus OX=10090 GN=Pdlim7 PE=1 SV=1	Pdlim7	0.897421	0.0271033	0.104415		0	101.448	27	10	56	2	2	457	50.1	8.47	216.91	11.8055	13.4338	12.2155	13.2775	13.0557	13.1519	12.872	13.4222	12.5097	13.66	REACTOME_DEVELOPMENTAL_BIOLOGY|REACTOME_NERVOUS_SYSTEM_DEVELOPMENT|REACTOME_NEUREXINS_AND_NEUROLIGINS|REACTOME_NEURONAL_SYSTEM|REACTOME_PROTEIN_PROTEIN_INTERACTIONS_AT_SYNAPSES|REACTOME_RET_SIGNALING
Q8R4U6	DNA topoisomerase I, mitochondrial OS=Mus musculus OX=10090 GN=Top1mt PE=2 SV=1	Top1mt	0.895772	0.00638299	0.0555579		0	11.342	3	2	5	0	1	593	69	9.22	16.76	5.50186	6.86271	5.75337	6.92567	6.15084	6.57905	5.98693	6.60829	6.10565	7.00179	REACTOME_POST_TRANSLATIONAL_PROTEIN_MODIFICATION|REACTOME_SUMOYLATION|REACTOME_SUMOYLATION_OF_DNA_REPLICATION_PROTEINS
Q8BSH3	Isoform of P58771, Tropomyosin alpha-1 chain OS=Mus musculus OX=10090 GN=Tpm1 PE=1 SV=1	Tpm1	0.88672	0.0847146	0.197273		0	506.51	98	80	751	1	7	284	32.7	4.74	2415.23	16.7156	18.9378	17.5286	18.7308	17.833	18.0798	18.6478	18.6975	17.6272	18.3399	REACTOME_MUSCLE_CONTRACTION|REACTOME_SMOOTH_MUSCLE_CONTRACTION|REACTOME_STRIATED_MUSCLE_CONTRACTION
Q3UV17	Keratin, type II cytoskeletal 2 oral OS=Mus musculus OX=10090 GN=Krt76 PE=1 SV=1	Krt76	0.881851	0.11514	0.237056		0	35.974	8	9	15	1	1	594	62.8	8.43	42.99	8.66475	9.3153	8.92395	11.4865	8.8859	8.85653	8.52384	9.0809	9.42186	10.0903	REACTOME_DEVELOPMENTAL_BIOLOGY|REACTOME_FORMATION_OF_THE_CORNIFIED_ENVELOPE|REACTOME_KERATINIZATION
Q1XH17	Tripartite motif-containing protein 72 OS=Mus musculus OX=10090 GN=Trim72 PE=1 SV=1	Trim72	0.881123	0.00792476	0.0604804		0	184.76	56	22	107	22	22	477	52.8	6.42	379.46	13.4135	14.9808	13.9576	14.7848	13.9742	14.7746	14.2338	14.9052	13.948	14.4872	REACTOME_MUSCLE_CONTRACTION|REACTOME_SMOOTH_MUSCLE_CONTRACTION
E9QB01	Isoform of P13595, Neural cell adhesion molecule 1 OS=Mus musculus OX=10090 GN=Ncam1 PE=1 SV=2	Ncam1	0.874351	0.0173856	0.0854917		0	53.358	13	11	17	1	1	849	93.6	4.93	50.11	8.46869	9.21095	8.51847	8.9814	7.5991	9.27306	7.49958	8.51134	8.11961	8.60045	REACTOME_CYTOKINE_SIGNALING_IN_IMMUNE_SYSTEM|REACTOME_DEVELOPMENTAL_BIOLOGY|REACTOME_ECM_PROTEOGLYCANS|REACTOME_EXTRACELLULAR_MATRIX_ORGANIZATION|REACTOME_FLT3_SIGNALING|REACTOME_INTERFERON_GAMMA_SIGNALING|REACTOME_INTERFERON_SIGNALING|REACTOME_L1CAM_INTERACTIONS|REACTOME_MAPK_FAMILY_SIGNALING_CASCADES|REACTOME_NCAM_SIGNALING_FOR_NEURITE_OUT_GROWTH|REACTOME_NCAM1_INTERACTIONS|REACTOME_NERVOUS_SYS…
E9Q0F0	Keratin 78 OS=Mus musculus OX=10090 GN=Krt78 PE=1 SV=1	Krt78	0.855924	0.203743	0.34324		0	21.319	3	4	8	3	3	1068	112.2	7.97	26.37	9.12369	10.7477	9.3613	11.9271	9.63343	9.44526	9.6784	9.21292	10.6786	11.422	REACTOME_DEVELOPMENTAL_BIOLOGY|REACTOME_FORMATION_OF_THE_CORNIFIED_ENVELOPE|REACTOME_KERATINIZATION
O88990	Alpha-actinin-3 OS=Mus musculus OX=10090 GN=Actn3 PE=2 SV=1	Actn3	0.848188	0.0823589	0.193829		0	800.956	79	88	927	66	67	900	103	5.45	3362.9	16.1963	18.405	17.11	18.0156	17.6868	17.7612	17.836	18.2129	17.3026	17.9779	REACTOME_ACTIVATION_OF_NMDA_RECEPTORS_AND_POSTSYNAPTIC_EVENTS|REACTOME_ASSEMBLY_AND_CELL_SURFACE_PRESENTATION_OF_NMDA_RECEPTORS|REACTOME_CELL_CELL_COMMUNICATION|REACTOME_CELL_EXTRACELLULAR_MATRIX_INTERACTIONS|REACTOME_CELL_JUNCTION_ORGANIZATION|REACTOME_CREB1_PHOSPHORYLATION_THROUGH_NMDA_RECEPTOR_MEDIATED_ACTIVATION_OF_RAS_SIGNALING|REACTOME_CYTOKINE_SIGNALING_IN_IMMUNE_SYSTEM|REACTOME_EXTRACELLU…
P13412	Troponin I, fast skeletal muscle OS=Mus musculus OX=10090 GN=Tnni2 PE=2 SV=2	Tnni2	0.844263	0.0722666	0.180233		0	155.483	77	25	278	0	3	182	21.3	8.5	792.38	14.8589	16.9069	15.586	16.7013	15.9504	16.1834	16.5104	16.6469	15.7499	16.4383	REACTOME_CARDIAC_CONDUCTION|REACTOME_ION_HOMEOSTASIS|REACTOME_MUSCLE_CONTRACTION|REACTOME_STRIATED_MUSCLE_CONTRACTION
A6ZI44	Isoform of P05064, Fructose-bisphosphate aldolase OS=Mus musculus OX=10090 GN=Aldoa PE=1 SV=1	Aldoa	0.835463	0.0590875	0.161414		0	520.521	82	51	800	0	1	418	45.1	7.91	3036.45	16.2497	18.2073	16.9307	18.0549	17.4034	17.6731	17.7004	18.0108	17.1284	17.6438	REACTOME_GLUCONEOGENESIS|REACTOME_GLUCOSE_METABOLISM|REACTOME_GLYCOLYSIS|REACTOME_HEMOSTASIS|REACTOME_INNATE_IMMUNE_SYSTEM|REACTOME_METABOLISM_OF_CARBOHYDRATES|REACTOME_NEUTROPHIL_DEGRANULATION|REACTOME_PLATELET_ACTIVATION_SIGNALING_AND_AGGREGATION|REACTOME_RESPONSE_TO_ELEVATED_PLATELET_CYTOSOLIC_CA2_
Q9JK42	[Pyruvate dehydrogenase (acetyl-transferring)] kinase isozyme 2, mitochondrial OS=Mus musculus OX=10090 GN=Pdk2 PE=1 SV=2	Pdk2	0.834552	0.00570242	0.0539994		0	87.12	35	11	33	9	10	407	46	6.61	102.88	11.5251	12.846	11.9336	12.8143	12.4775	12.8763	12.4749	13.1112	11.9841	12.9201	REACTOME_PYRUVATE_METABOLISM|REACTOME_PYRUVATE_METABOLISM_AND_CITRIC_ACID_TCA_CYCLE|REACTOME_REGULATION_OF_PYRUVATE_DEHYDROGENASE_PDH_COMPLEX|REACTOME_SIGNALING_BY_NUCLEAR_RECEPTORS|REACTOME_SIGNALING_BY_RETINOIC_ACID|REACTOME_THE_CITRIC_ACID_TCA_CYCLE_AND_RESPIRATORY_ELECTRON_TRANSPORT
Q8BZ52	Fibronectin type III and SPRY domain-containing protein 2 OS=Mus musculus OX=10090 GN=Fsd2 PE=1 SV=3	Fsd2	0.834046	0.00517739	0.0514837		0	61.45	24	12	20	12	12	716	81.4	4.91	67.41	11.0273	12.3904	11.3252	12.235	11.6687	12.1423	11.6469	12.2986	11.5835	12.3555	NA
Z4YKG8	Isoform of Q9QZ47, Troponin T, fast skeletal muscle OS=Mus musculus OX=10090 GN=Tnnt3 PE=1 SV=1	Tnnt3	0.830823	0.061819	0.16514		0	312.559	60	38	569	0	5	263	31.3	5.69	1738.68	16.1272	18.052	16.8246	17.8837	17.3501	17.455	17.6406	17.9159	16.9861	17.7762	REACTOME_MUSCLE_CONTRACTION|REACTOME_STRIATED_MUSCLE_CONTRACTION
Q80W93	Hydrocephalus-inducing protein OS=Mus musculus OX=10090 GN=Hydin PE=1 SV=2	Hydin	0.830514	0.263128	0.408862		0.004	3.102	0	2	2	1	2	5154	581.2	6.38	4.64	8.26382	7.77858	8.10762	8.13354	8.52946	8.41668	8.66428	10.7196	8.27081	10.9401	NA
Q8R5J9	PRA1 family protein 3 OS=Mus musculus OX=10090 GN=Arl6ip5 PE=1 SV=2	Arl6ip5	0.826578	0.00496092	0.0504546		0	41.091	24	5	19	5	5	188	21.5	9.61	64.82	12.0104	13.2124	12.2192	12.8465	11.8728	12.9245	12.155	13.0283	12.2296	12.6082	REACTOME_GLUTAMATE_NEUROTRANSMITTER_RELEASE_CYCLE|REACTOME_NEURONAL_SYSTEM|REACTOME_NEUROTRANSMITTER_RELEASE_CYCLE|REACTOME_TRANSMISSION_ACROSS_CHEMICAL_SYNAPSES
E9Q0B5	Fc fragment of IgG-binding protein OS=Mus musculus OX=10090 GN=Fcgbp PE=1 SV=1	Fcgbp	0.823649	0.180764	0.316577		0.016	2.141	0	1	3	0	1	2583	275	5.03	8.26	9.12884	10.2608	9.50824	12.0668	10.0128	9.72101	9.34764	9.26198	10.1562	10.9612	REACTOME_POST_TRANSLATIONAL_MODIFICATION_SYNTHESIS_OF_GPI_ANCHORED_PROTEINS|REACTOME_POST_TRANSLATIONAL_PROTEIN_MODIFICATION
A0A571BF58	Nebulin OS=Mus musculus OX=10090 GN=Neb PE=1 SV=1	Neb	0.82072	0.100093	0.216807		0	4417.48	79	580	3018	0	332	7523	870.7	9.07	9416.26	18.1173	20.362	19.0995	20.0617	19.5649	19.6746	19.8842	20.1224	19.315	19.8639	REACTOME_MUSCLE_CONTRACTION|REACTOME_STRIATED_MUSCLE_CONTRACTION
P20801	Troponin C, skeletal muscle OS=Mus musculus OX=10090 GN=Tnnc2 PE=1 SV=2	Tnnc2	0.812607	0.0832422	0.19519		0	145.879	84	12	248	11	11	160	18.1	4.2	744.91	14.2996	16.4337	15.2188	16.1436	15.5411	15.7707	16.0386	16.2794	15.3696	15.9033	REACTOME_MUSCLE_CONTRACTION|REACTOME_STRIATED_MUSCLE_CONTRACTION
F7DCU7	Isoform of Q2VPA6, Helicase POLQ-like (Fragment) OS=Mus musculus OX=10090 GN=Helq PE=1 SV=1	Helq	0.810836	0.0375072	0.124675		0.001	5.549	1	2	15	0	1	972	107.8	6.76	39.59	10.4069	11.0164	10.2826	11.6886	11.4204	11.441	10.8633	11.4834	10.3319	11.7299	NA
B7ZMV8	Isoform of Q5M6W3, Clathrin heavy chain linker domain-containing protein 1 OS=Mus musculus OX=10090 GN=Clhc1 PE=2 SV=1	Clhc1	0.797973	0.323703	0.466527		0.015	2.289	1	1	1	0	1	585	68.1	8.16	2.83	7.9754	7.23812	7.70426	7.79583	8.29703	7.97261	8.3752	10.4701	8.09262	10.9577	NA
E9QLJ0	Isoform of Q70KF4, Cardiomyopathy-associated protein 5 OS=Mus musculus OX=10090 GN=Cmya5 PE=1 SV=1	Cmya5	0.792306	0.011625	0.0704478		0	479.042	33	80	144	16	79	3676	405.3	4.74	507.64	13.243	14.6983	13.6475	14.5078	13.8823	14.3138	14.0183	14.5838	13.8459	14.4949	NA
A0A0G2JFD8	Isoform of Q7TPW1, Nexilin OS=Mus musculus OX=10090 GN=Nexn PE=1 SV=1	Nexn	0.790683	0.0204937	0.0914634		0	85.344	35	18	39	1	1	536	64.1	5.39	135.81	4.37939	4.45495	4.05507	4.79762	3.3407	4.74307	3.46994	4.38493	4.06159	4.87954	NA
A0A0R4J166	Isoform of Q9D783, Kelch-like protein 40 OS=Mus musculus OX=10090 GN=Klhl40 PE=1 SV=1	Klhl40	0.780051	0.00490742	0.0502952		0	91.6	28	15	35	0	15	621	69.6	5.17	116.61	12.2742	13.558	12.6116	13.2445	12.55	13.3602	12.6387	13.3544	12.6171	13.0748	REACTOME_ADAPTIVE_IMMUNE_SYSTEM|REACTOME_ANTIGEN_PROCESSING_UBIQUITINATION_PROTEASOME_DEGRADATION|REACTOME_CLASS_I_MHC_MEDIATED_ANTIGEN_PROCESSING_PRESENTATION|REACTOME_NEDDYLATION|REACTOME_POST_TRANSLATIONAL_PROTEIN_MODIFICATION
Q8BVI4	Dihydropteridine reductase OS=Mus musculus OX=10090 GN=Qdpr PE=1 SV=2	Qdpr	0.773955	0.00506963	0.0510142		0	66.606	49	9	36	0	9	241	25.6	7.81	118.19	11.7712	13.0804	12.1343	12.8594	12.4062	12.9419	12.466	13.0494	12.0562	12.7725	REACTOME_METABOLISM_OF_AMINO_ACIDS_AND_DERIVATIVES|REACTOME_PHENYLALANINE_AND_TYROSINE_METABOLISM|REACTOME_PHENYLALANINE_METABOLISM
Q8BWQ4	Cap-specific mRNA (nucleoside-2'-O-)-methyltransferase 2 OS=Mus musculus OX=10090 GN=Cmtr2 PE=2 SV=1	Cmtr2	0.768967	0.0154959	0.0809594		0.066	1.088	1	1	1	1	1	767	87.1	7.08	2.28	8.61997	9.80221	8.42694	9.68257	8.80655	9.37834	8.65342	8.95243	8.72901	9.26519	NA
Q9CQC9	GTP-binding protein SAR1b OS=Mus musculus OX=10090 GN=Sar1b PE=1 SV=1	Sar1b	0.764491	0.00871787	0.0624497		0	96.575	74	10	58	6	6	198	22.4	6.11	217.56	12.4783	13.8365	12.8657	13.558	13.1168	13.5422	13.2315	13.8037	12.9074	13.6817	REACTOME_ADAPTIVE_IMMUNE_SYSTEM|REACTOME_ANTIGEN_PRESENTATION_FOLDING_ASSEMBLY_AND_PEPTIDE_LOADING_OF_CLASS_I_MHC|REACTOME_ASPARAGINE_N_LINKED_GLYCOSYLATION|REACTOME_CARGO_CONCENTRATION_IN_THE_ER|REACTOME_CHYLOMICRON_ASSEMBLY|REACTOME_CLASS_I_MHC_MEDIATED_ANTIGEN_PROCESSING_PRESENTATION|REACTOME_COPII_MEDIATED_VESICLE_TRANSPORT|REACTOME_ER_TO_GOLGI_ANTEROGRADE_TRANSPORT|REACTOME_MEMBRANE_TRAFFICK…
Q14BI5	Myomesin 2 OS=Mus musculus OX=10090 GN=Myom2 PE=1 SV=1	Myom2	0.762493	0.0901365	0.204303		0	943.962	72	106	893	106	106	1463	164.6	5.77	3044.05	16.2841	18.3436	17.176	17.9381	17.6347	17.755	17.8704	18.163	17.3417	17.9196	NA
P97433	Rho guanine nucleotide exchange factor 28 OS=Mus musculus OX=10090 GN=Arhgef28 PE=1 SV=1	Arhgef28	0.762383	0.313805	0.457358		0.009	2.618	0	1	1	0	1	1693	190.2	5.97	2.5	7.05597	6.53765	6.97033	7.0116	7.67747	7.31144	7.66738	9.52597	7.15048	9.94689	REACTOME_CELL_DEATH_SIGNALLING_VIA_NRAGE_NRIF_AND_NADE|REACTOME_DEATH_RECEPTOR_SIGNALLING|REACTOME_DEVELOPMENTAL_BIOLOGY|REACTOME_EPH_EPHRIN_SIGNALING|REACTOME_EPHB_MEDIATED_FORWARD_SIGNALING|REACTOME_G_ALPHA_12_13_SIGNALLING_EVENTS|REACTOME_NERVOUS_SYSTEM_DEVELOPMENT|REACTOME_NRAGE_SIGNALS_DEATH_THROUGH_JNK|REACTOME_P75_NTR_RECEPTOR_MEDIATED_SIGNALLING|REACTOME_RHO_GTPASE_CYCLE|REACTOME_SIGNALIN…
Q5DTZ0	Protein NYNRIN OS=Mus musculus OX=10090 GN=Nynrin PE=2 SV=2	Nynrin	0.758113	0.151714	0.281589		0.046	1.26	0	1	1	1	1	1840	202.9	6.99	1.72	7.09006	7.03058	7.09157	7.39274	7.50827	7.55755	7.6039	8.94815	7.39693	9.55227	NA
Q9JKS4-6	Isoform of Q9JKS4, Isoform 6 of LIM domain-binding protein 3 OS=Mus musculus OX=10090 GN=Ldb3 PE=1 SV=1	Ldb3	0.75805	0.0518005	0.149531		0	209.431	64	16	221	0	1	288	31.4	9.19	818.69	11.0267	12.6707	11.6868	12.5374	12.4347	12.4484	12.4269	12.7907	11.7476	12.6657	NA
Q8C7X2	ER membrane protein complex subunit 1 OS=Mus musculus OX=10090 GN=Emc1 PE=1 SV=1	Emc1	0.751056	0.0116762	0.0705467		0	64.529	18	14	19	1	1	997	111.5	7.43	66.71	7.14026	7.93757	7.2548	8.46074	7.7484	8.04286	7.61749	8.06011	7.58215	8.59709	NA
Q3TN34	MICAL-like protein 2 OS=Mus musculus OX=10090 GN=Micall2 PE=1 SV=1	Micall2	0.751056	0.0593011	0.161437		0.001	4.726	2	2	3	1	2	1009	108.2	9.55	2.49	9.48529	11.0721	10.0354	10.9716	10.9182	10.8433	10.7075	11.0296	10.1749	11.16	NA
Q60597-3	Isoform of Q60597, Isoform 3 of 2-oxoglutarate dehydrogenase, mitochondrial OS=Mus musculus OX=10090 GN=Ogdh PE=1 SV=3	Ogdh	0.748774	0.0219824	0.0955101		0	498.782	57	53	278	1	2	1038	118.1	6.87	992.11	14.8563	16.3793	15.3868	16.1052	15.6923	16.0209	15.803	16.2967	15.3639	16.044	REACTOME_CITRIC_ACID_CYCLE_TCA_CYCLE_|REACTOME_GLYOXYLATE_METABOLISM_AND_GLYCINE_DEGRADATION|REACTOME_LYSINE_CATABOLISM|REACTOME_METABOLISM_OF_AMINO_ACIDS_AND_DERIVATIVES|REACTOME_PYRUVATE_METABOLISM_AND_CITRIC_ACID_TCA_CYCLE|REACTOME_THE_CITRIC_ACID_TCA_CYCLE_AND_RESPIRATORY_ELECTRON_TRANSPORT
Q3TMP8	Trimeric intracellular cation channel type A OS=Mus musculus OX=10090 GN=Tmem38a PE=1 SV=2	Tmem38a	0.748107	0.0170514	0.0848833		0	66.469	27	9	41	6	9	298	33.3	8.37	141.45	13.0071	14.4417	13.6207	14.3872	14.067	14.3602	14.05	14.5909	13.7874	14.4926	NA
Q8CH09	SURP and G-patch domain-containing protein 2 OS=Mus musculus OX=10090 GN=Sugp2 PE=1 SV=2	Sugp2	0.746679	0.00916137	0.0637176		0.018	1.955	1	1	1	1	1	1067	118	8.31	2.21	6.69708	7.923	7.24447	7.96657	7.56134	7.97208	7.76159	8.17504	7.28681	8.248	NA
A0A5K1VVQ9	Isoform of A2ASS6, Titin OS=Mus musculus OX=10090 GN=Ttn PE=1 SV=1	Ttn	0.741684	0.138753	0.265336		0	16532.8	68	2356	11877	0	3	35390	3923.1	6.23	41550.1	20.0461	22.3508	21.1158	21.8242	21.3518	21.5276	21.8254	22.0496	21.3271	21.6224	REACTOME_CELL_DEATH_SIGNALLING_VIA_NRAGE_NRIF_AND_NADE|REACTOME_DEATH_RECEPTOR_SIGNALLING|REACTOME_G_ALPHA_12_13_SIGNALLING_EVENTS|REACTOME_HEMOSTASIS|REACTOME_MUSCLE_CONTRACTION|REACTOME_NEDDYLATION|REACTOME_NRAGE_SIGNALS_DEATH_THROUGH_JNK|REACTOME_P75_NTR_RECEPTOR_MEDIATED_SIGNALLING|REACTOME_PLATELET_ACTIVATION_SIGNALING_AND_AGGREGATION|REACTOME_POST_TRANSLATIONAL_PROTEIN_MODIFICATION|REACTOME…
Q5XKE0	Myosin-binding protein C, fast-type OS=Mus musculus OX=10090 GN=Mybpc2 PE=1 SV=1	Mybpc2	0.740066	0.113828	0.235177		0	670.53	73	95	573	86	93	1136	127.3	6.35	1875.41	15.763	17.8575	16.6155	17.3917	17.0745	17.0735	17.3511	17.548	16.9387	17.5725	REACTOME_MUSCLE_CONTRACTION|REACTOME_STRIATED_MUSCLE_CONTRACTION
Q6P6L5	Isoform of A0A571BEN1, Myosin-binding protein C, slow-type OS=Mus musculus OX=10090 GN=Mybpc1 PE=1 SV=1	Mybpc1	0.739032	0.059487	0.161687		0	578.011	69	87	540	3	3	1124	126.1	5.95	1727.01	15.7787	17.5843	16.5242	17.3473	16.8764	17.13	17.0677	17.433	16.5691	17.0166	REACTOME_MUSCLE_CONTRACTION|REACTOME_STRIATED_MUSCLE_CONTRACTION
A0A0A6YY91	Isoform of P13595, Neural cell adhesion molecule 1 (Fragment) OS=Mus musculus OX=10090 GN=Ncam1 PE=1 SV=1	Ncam1	0.736489	0.00988531	0.0657666		0	54.142	11	12	18	1	2	1089	116.3	4.83	52.24	11.525	12.5045	11.7554	12.1665	11.2073	12.4295	11.3072	11.9563	11.5554	11.9758	REACTOME_CYTOKINE_SIGNALING_IN_IMMUNE_SYSTEM|REACTOME_DEVELOPMENTAL_BIOLOGY|REACTOME_ECM_PROTEOGLYCANS|REACTOME_EXTRACELLULAR_MATRIX_ORGANIZATION|REACTOME_FLT3_SIGNALING|REACTOME_INTERFERON_GAMMA_SIGNALING|REACTOME_INTERFERON_SIGNALING|REACTOME_L1CAM_INTERACTIONS|REACTOME_MAPK_FAMILY_SIGNALING_CASCADES|REACTOME_NCAM_SIGNALING_FOR_NEURITE_OUT_GROWTH|REACTOME_NCAM1_INTERACTIONS|REACTOME_NERVOUS_SYS…
A2A5Y6	Isoform of P10637, Microtubule-associated protein OS=Mus musculus OX=10090 GN=Mapt PE=1 SV=1	Mapt	0.735533	0.00889491	0.0630216		0	119.752	28	17	44	2	2	749	78	6.51	160.6	12.6001	13.8629	13.0018	13.6848	12.7882	13.6421	13.0581	13.5543	12.8732	13.2549	REACTOME_ACTIVATION_OF_AMPK_DOWNSTREAM_OF_NMDARS|REACTOME_ACTIVATION_OF_NMDA_RECEPTORS_AND_POSTSYNAPTIC_EVENTS|REACTOME_APOPTOTIC_CLEAVAGE_OF_CELLULAR_PROTEINS|REACTOME_APOPTOTIC_EXECUTION_PHASE|REACTOME_CASPASE_MEDIATED_CLEAVAGE_OF_CYTOSKELETAL_PROTEINS|REACTOME_NEURONAL_SYSTEM|REACTOME_NEUROTRANSMITTER_RECEPTORS_AND_POSTSYNAPTIC_SIGNAL_TRANSMISSION|REACTOME_PROGRAMMED_CELL_DEATH|REACTOME_TRANSM…
P05132	cAMP-dependent protein kinase catalytic subunit alpha OS=Mus musculus OX=10090 GN=Prkaca PE=1 SV=3	Prkaca	0.732975	0.00589533	0.0544339		0	108.983	37	17	53	2	9	351	40.5	8.79	169.32	13.1694	14.4461	13.5923	14.2577	13.7236	14.2928	13.8984	14.4756	13.5389	14.1154	REACTOME_ACTIVATION_OF_NMDA_RECEPTORS_AND_POSTSYNAPTIC_EVENTS|REACTOME_ADAPTIVE_IMMUNE_SYSTEM|REACTOME_ADORA2B_MEDIATED_ANTI_INFLAMMATORY_CYTOKINES_PRODUCTION|REACTOME_ANCHORING_OF_THE_BASAL_BODY_TO_THE_PLASMA_MEMBRANE|REACTOME_ANTI_INFLAMMATORY_RESPONSE_FAVOURING_LEISHMANIA_PARASITE_INFECTION|REACTOME_AQUAPORIN_MEDIATED_TRANSPORT|REACTOME_AURKA_ACTIVATION_BY_TPX2|REACTOME_C_TYPE_LECTIN_RECEPTORS…
Q5SVJ0	Isoform of P28652, Calcium/calmodulin-dependent protein kinase OS=Mus musculus OX=10090 GN=Camk2b PE=1 SV=1	Camk2b	0.730142	0.0122533	0.0722282		0	126.733	41	19	43	1	12	666	72.9	7.27	155.8	12.733	14.1195	13.1894	13.774	13.2225	13.8529	13.3484	13.9716	13.2528	13.6787	REACTOME_ACTIVATION_OF_NMDA_RECEPTORS_AND_POSTSYNAPTIC_EVENTS|REACTOME_ASSEMBLY_AND_CELL_SURFACE_PRESENTATION_OF_NMDA_RECEPTORS|REACTOME_BETA_CATENIN_INDEPENDENT_WNT_SIGNALING|REACTOME_CA_DEPENDENT_EVENTS|REACTOME_CA2_PATHWAY|REACTOME_CAMK_IV_MEDIATED_PHOSPHORYLATION_OF_CREB|REACTOME_CARDIAC_CONDUCTION|REACTOME_CELLULAR_RESPONSE_TO_HEAT_STRESS|REACTOME_CELLULAR_RESPONSES_TO_EXTERNAL_STIMULI|REACT…
B1AZA7	Isoform of O88327, Alpha-catulin OS=Mus musculus OX=10090 GN=Ctnnal1 PE=1 SV=1	Ctnnal1	0.72336	0.0988474	0.215293		0.056	1.173	6	1	1	0	1	219	23.6	8.66	2.71	7.16976	7.56999	6.96462	8.76195	8.22709	8.11414	7.5313	7.89762	7.37482	8.54068	NA
P97457	Myosin regulatory light chain 2, skeletal muscle isoform OS=Mus musculus OX=10090 GN=Mylpf PE=1 SV=3	Mylpf	0.722138	0.103359	0.221688		0	330.875	95	33	658	0	32	169	18.9	4.92	2186.88	16.0222	17.9174	16.7511	17.8069	17.1255	17.268	17.6434	17.6716	16.9849	17.4739	REACTOME_MUSCLE_CONTRACTION|REACTOME_SMOOTH_MUSCLE_CONTRACTION|REACTOME_STRIATED_MUSCLE_CONTRACTION
Q8K1M3	Isoform of P12367, Protein kinase, cAMP dependent regulatory, type II alpha OS=Mus musculus OX=10090 GN=Prkar2a PE=1 SV=1	Prkar2a	0.717666	0.0141787	0.0770863		0	115.02	47	15	48	0	15	402	45.6	4.93	160.93	12.3412	13.7149	12.7887	13.5307	13.1256	13.5416	13.2271	13.7212	12.7767	13.3392	REACTOME_ACTIVATION_OF_NMDA_RECEPTORS_AND_POSTSYNAPTIC_EVENTS|REACTOME_ADORA2B_MEDIATED_ANTI_INFLAMMATORY_CYTOKINES_PRODUCTION|REACTOME_ANCHORING_OF_THE_BASAL_BODY_TO_THE_PLASMA_MEMBRANE|REACTOME_ANTI_INFLAMMATORY_RESPONSE_FAVOURING_LEISHMANIA_PARASITE_INFECTION|REACTOME_AQUAPORIN_MEDIATED_TRANSPORT|REACTOME_AURKA_ACTIVATION_BY_TPX2|REACTOME_CA_DEPENDENT_EVENTS|REACTOME_CELL_CYCLE|REACTOME_CELL_C…
A0A0G2JFH2	Isoform of P27546, Microtubule-associated protein (Fragment) OS=Mus musculus OX=10090 GN=Map4 PE=1 SV=1	Map4	0.714773	0.0102484	0.0666887		0	395.25	49	63	130	41	41	1441	152.7	9.28	437.6	13.9589	15.2427	14.3235	15.0653	14.2074	14.8903	14.4176	14.8964	14.425	14.8115	NA
A0A1W2P7X0	Isoform of Q4KML4, ABRA C-terminal-like protein (Fragment) OS=Mus musculus OX=10090 GN=Abracl PE=1 SV=1	Abracl	0.709966	0.0502561	0.146637		0.002	4.059	16	1	2	0	1	57	6.4	8.92	6.45	9.6814	9.88943	9.47239	9.59925	8.87221	10.1427	8.98531	10.3241	9.49373	10.0994	NA
P05977	Myosin light chain 1/3, skeletal muscle isoform OS=Mus musculus OX=10090 GN=Myl1 PE=1 SV=2	Myl1	0.70696	0.106128	0.225013		0	406.77	93	35	1051	0	30	188	20.6	5.03	3748.36	16.2078	18.172	17.002	17.8433	17.2371	17.4227	17.8567	17.9508	17.1904	17.6399	REACTOME_MUSCLE_CONTRACTION|REACTOME_STRIATED_MUSCLE_CONTRACTION
P68134	Actin, alpha skeletal muscle OS=Mus musculus OX=10090 GN=Acta1 PE=1 SV=1	Acta1	0.706619	0.0986713	0.215068		0	696.3	80	52	2663	5	7	377	42	5.39	7171.3	17.4189	19.3598	18.2251	19.0196	18.5998	18.7043	18.8768	19.1239	18.4332	18.8792	REACTOME_ADHERENS_JUNCTIONS_INTERACTIONS|REACTOME_B_WICH_COMPLEX_POSITIVELY_REGULATES_RRNA_EXPRESSION|REACTOME_CELL_CELL_COMMUNICATION|REACTOME_CELL_CELL_JUNCTION_ORGANIZATION|REACTOME_CELL_EXTRACELLULAR_MATRIX_INTERACTIONS|REACTOME_CELL_JUNCTION_ORGANIZATION|REACTOME_CHROMATIN_MODIFYING_ENZYMES|REACTOME_CLATHRIN_MEDIATED_ENDOCYTOSIS|REACTOME_COOPERATION_OF_PREFOLDIN_AND_TRIC_CCT_IN_ACTIN_AND_TUB…
P06801	NADP-dependent malic enzyme OS=Mus musculus OX=10090 GN=Me1 PE=1 SV=2	Me1	0.705466	0.0349379	0.120238		0	128.038	38	20	60	2	20	572	63.9	7.44	182.91	12.8861	14.4711	13.3461	14.0115	13.5707	13.977	13.7537	14.1725	13.3732	13.8251	REACTOME_CITRIC_ACID_CYCLE_TCA_CYCLE_|REACTOME_METABOLISM_OF_LIPIDS|REACTOME_PYRUVATE_METABOLISM|REACTOME_PYRUVATE_METABOLISM_AND_CITRIC_ACID_TCA_CYCLE|REACTOME_REGULATION_OF_LIPID_METABOLISM_BY_PPARALPHA|REACTOME_THE_CITRIC_ACID_TCA_CYCLE_AND_RESPIRATORY_ELECTRON_TRANSPORT
G3UW82	Myosin, heavy polypeptide 2, skeletal muscle, adult OS=Mus musculus OX=10090 GN=Myh2 PE=1 SV=1	Myh2	0.703783	0.105601	0.224253		0	3050.43	80	281	6349	35	36	1942	223.1	5.77	21386.4	14.7907	16.5638	15.4082	16.6327	16.1613	16.3743	15.9585	16.2181	15.1901	15.2388	REACTOME_ANTI_INFLAMMATORY_RESPONSE_FAVOURING_LEISHMANIA_PARASITE_INFECTION|REACTOME_CD163_MEDIATING_AN_ANTI_INFLAMMATORY_RESPONSE|REACTOME_DEVELOPMENTAL_BIOLOGY|REACTOME_DISEASE|REACTOME_EPH_EPHRIN_SIGNALING|REACTOME_EPHA_MEDIATED_GROWTH_CONE_COLLAPSE|REACTOME_FCGAMMA_RECEPTOR_FCGR_DEPENDENT_PHAGOCYTOSIS|REACTOME_INFECTIOUS_DISEASE|REACTOME_INNATE_IMMUNE_SYSTEM|REACTOME_LEISHMANIA_INFECTION|REAC…
Q9D154	Leukocyte elastase inhibitor A OS=Mus musculus OX=10090 GN=Serpinb1a PE=1 SV=1	Serpinb1a	0.703704	0.0294857	0.109856		0	126.101	57	23	49	9	23	379	42.5	6.21	179.86	13.0468	13.8443	13.1776	13.8166	12.6506	14.0068	12.9211	13.623	13.3325	13.3565	REACTOME_INNATE_IMMUNE_SYSTEM|REACTOME_NEUTROPHIL_DEGRANULATION
Q66JS6	Eukaryotic translation initiation factor 3 subunit J-B OS=Mus musculus OX=10090 GN=Eif3j2 PE=1 SV=1	Eif3j2	0.702795	0.00677281	0.0572711		0	60.237	43	10	19	0	10	263	29.5	4.81	56.06	11.4596	12.6146	11.6526	12.5244	11.8167	12.2258	11.8208	12.3728	11.6881	12.2142	REACTOME_ACTIVATION_OF_THE_MRNA_UPON_BINDING_OF_THE_CAP_BINDING_COMPLEX_AND_EIFS_AND_SUBSEQUENT_BINDING_TO_43S|REACTOME_EUKARYOTIC_TRANSLATION_INITIATION|REACTOME_TRANSLATION
A0A1L1SSF6	Isoform of Q8BHE4, Transmembrane protein 108 OS=Mus musculus OX=10090 GN=Tmem108 PE=4 SV=1	Tmem108	0.700658	0.0334819	0.117625		0.009	2.568	24	1	6	1	1	45	4.9	7.18	13.65	10.7034	11.9764	11.1071	11.8735	11.9125	11.92	11.6965	12.1453	10.8573	11.8649	NA
B2RQK7	Isoform of Q8BWB1, Synaptopodin 2-like protein OS=Mus musculus OX=10090 GN=Synpo2l PE=1 SV=1	Synpo2l	0.700373	0.0148287	0.078855		0	101.867	28	22	42	1	22	978	103.2	9.82	133.02	12.7485	14.0748	13.1555	13.9023	13.3009	13.8756	13.3666	13.9031	13.2753	13.5929	NA
Q3V1D3	AMP deaminase 1 OS=Mus musculus OX=10090 GN=Ampd1 PE=1 SV=2	Ampd1	0.698435	0.0850172	0.197273		0	325.686	54	39	204	0	34	745	86.1	6.92	711.33	14.3529	16.0972	15.0275	15.8955	15.6929	15.6515	15.6613	15.9008	15.3244	16.0064	REACTOME_INNATE_IMMUNE_SYSTEM|REACTOME_METABOLISM_OF_NUCLEOTIDES|REACTOME_NEUTROPHIL_DEGRANULATION|REACTOME_NUCLEOTIDE_SALVAGE|REACTOME_PURINE_SALVAGE
A0A1B0GRY8	Isoform of P13412, Troponin I, fast skeletal muscle (Fragment) OS=Mus musculus OX=10090 GN=Tnni2 PE=1 SV=1	Tnni2	0.694577	0.0901352	0.204303		0	115.532	74	23	153	1	1	172	20.2	9.07	418.16	8.06154	9.93587	8.6249	9.39451	8.80268	8.98028	9.00328	9.24979	8.70386	9.10869	REACTOME_CARDIAC_CONDUCTION|REACTOME_ION_HOMEOSTASIS|REACTOME_MUSCLE_CONTRACTION|REACTOME_STRIATED_MUSCLE_CONTRACTION
P13541	Myosin-3 OS=Mus musculus OX=10090 GN=Myh3 PE=2 SV=2	Myh3	0.693083	0.0235115	0.0984617		0	1687.46	67	179	3150	64	64	1940	223.7	5.81	10007.1	15.2361	16.4605	15.7131	16.443	14.9133	15.8918	15.1659	15.5486	15.4196	15.5696	REACTOME_ANTI_INFLAMMATORY_RESPONSE_FAVOURING_LEISHMANIA_PARASITE_INFECTION|REACTOME_CD163_MEDIATING_AN_ANTI_INFLAMMATORY_RESPONSE|REACTOME_DEVELOPMENTAL_BIOLOGY|REACTOME_DISEASE|REACTOME_EPH_EPHRIN_SIGNALING|REACTOME_EPHA_MEDIATED_GROWTH_CONE_COLLAPSE|REACTOME_FCGAMMA_RECEPTOR_FCGR_DEPENDENT_PHAGOCYTOSIS|REACTOME_INFECTIOUS_DISEASE|REACTOME_INNATE_IMMUNE_SYSTEM|REACTOME_LEISHMANIA_INFECTION|REAC…
Q3TAA7	Serine/threonine-protein kinase 11-interacting protein OS=Mus musculus OX=10090 GN=Stk11ip PE=1 SV=1	Stk11ip	0.682358	0.0434046	0.13513		0.02	1.874	2	1	1	1	1	1072	117.9	4.96	2.74	7.30478	8.07925	7.4348	8.75903	8.12231	8.10693	7.67146	8.02994	8.02586	8.99585	REACTOME_INNATE_IMMUNE_SYSTEM|REACTOME_NEUTROPHIL_DEGRANULATION
Q6P3Z8	Isoform of Q9JHD2, Histone acetyltransferase OS=Mus musculus OX=10090 GN=Kat2a PE=1 SV=1	Kat2a	0.677951	0.261283	0.406724		0.004	3.325	2	2	2	0	2	829	93.3	9.07	3.84	8.24149	7.89519	8.18957	8.19674	8.44734	8.34878	8.46359	10.042	8.20192	10.4509	REACTOME_B_WICH_COMPLEX_POSITIVELY_REGULATES_RRNA_EXPRESSION|REACTOME_CARDIAC_CONDUCTION|REACTOME_CHROMATIN_MODIFYING_ENZYMES|REACTOME_DEUBIQUITINATION|REACTOME_DEVELOPMENTAL_BIOLOGY|REACTOME_DISEASE|REACTOME_DISEASES_OF_SIGNAL_TRANSDUCTION_BY_GROWTH_FACTOR_RECEPTORS_AND_SECOND_MESSENGERS|REACTOME_EPIGENETIC_REGULATION_OF_GENE_EXPRESSION|REACTOME_ESR_MEDIATED_SIGNALING|REACTOME_ESTROGEN_DEPENDENT…
Q9CPU0	Lactoylglutathione lyase OS=Mus musculus OX=10090 GN=Glo1 PE=1 SV=3	Glo1	0.677463	0.0142676	0.0771013		0	77.367	67	12	44	5	12	184	20.8	5.47	146.18	13.0881	14.3976	13.5275	14.1804	13.6419	14.0855	13.8957	14.3207	13.4901	14.0466	REACTOME_PYRUVATE_METABOLISM|REACTOME_PYRUVATE_METABOLISM_AND_CITRIC_ACID_TCA_CYCLE|REACTOME_THE_CITRIC_ACID_TCA_CYCLE_AND_RESPIRATORY_ELECTRON_TRANSPORT
Q3TJD7-2	Isoform of Q3TJD7, Isoform 2 of PDZ and LIM domain protein 7 OS=Mus musculus OX=10090 GN=Pdlim7 PE=1 SV=1	Pdlim7	0.677036	0.0757927	0.184527		0	94.551	64	10	55	1	3	188	21.1	9.5	214.94	9.91847	11.0043	9.99052	11.3129	10.8495	10.7876	10.7192	10.7717	10.1714	11.1577	REACTOME_DEVELOPMENTAL_BIOLOGY|REACTOME_NERVOUS_SYSTEM_DEVELOPMENT|REACTOME_NEUREXINS_AND_NEUROLIGINS|REACTOME_NEURONAL_SYSTEM|REACTOME_PROTEIN_PROTEIN_INTERACTIONS_AT_SYNAPSES|REACTOME_RET_SIGNALING
E9Q4K0	Isoform of Q8BL65, Actin-binding LIM protein 2 OS=Mus musculus OX=10090 GN=Ablim2 PE=1 SV=1	Ablim2	0.674949	0.0181535	0.0871397		0	61.374	24	13	26	0	12	664	73.6	8.07	81.53	11.8868	12.8214	12.141	12.7419	12.069	12.6298	12.2528	13.4035	12.274	12.4018	REACTOME_DCC_MEDIATED_ATTRACTIVE_SIGNALING|REACTOME_DEVELOPMENTAL_BIOLOGY|REACTOME_NERVOUS_SYSTEM_DEVELOPMENT|REACTOME_NETRIN_1_SIGNALING
Q70IV5-2	Isoform of Q70IV5, Isoform 2 of Synemin OS=Mus musculus OX=10090 GN=Synm PE=1 SV=2	Synm	0.673421	0.0152991	0.0805009		0	360.743	58	62	136	0	1	1259	140.8	5.15	469.31	4.64214	5.07518	4.29303	5.55991	5.01158	5.46173	4.59464	5.002	4.75152	5.56119	NA
P07310	Creatine kinase M-type OS=Mus musculus OX=10090 GN=Ckm PE=1 SV=1	Ckm	0.672582	0.108929	0.228489		0	499.401	97	57	1502	9	54	381	43	7.06	4285.34	17.2397	19.1253	18.0502	18.8846	18.3115	18.4557	18.6776	18.877	18.2949	18.5943	REACTOME_CREATINE_METABOLISM|REACTOME_METABOLISM_OF_AMINO_ACIDS_AND_DERIVATIVES
G3X8T7	Isoform of Q9ER60, Sodium channel protein OS=Mus musculus OX=10090 GN=Scn4a PE=3 SV=1	Scn4a	0.671932	0.0126532	0.0731193		0	23.222	4	6	7	0	6	1841	208.6	5.03	18.18	8.6786	9.56249	8.91571	9.66848	9.56775	9.73291	9.34685	9.84525	8.97112	10.0305	REACTOME_CARDIAC_CONDUCTION|REACTOME_DEVELOPMENTAL_BIOLOGY|REACTOME_INTERACTION_BETWEEN_L1_AND_ANKYRINS|REACTOME_L1CAM_INTERACTIONS|REACTOME_MUSCLE_CONTRACTION|REACTOME_NERVOUS_SYSTEM_DEVELOPMENT|REACTOME_PHASE_0_RAPID_DEPOLARISATION
Q3U3J1	Isoform of P50136, 2-oxoisovalerate dehydrogenase subunit alpha OS=Mus musculus OX=10090 GN=Bckdha PE=1 SV=1	Bckdha	0.66633	0.00994503	0.0659542		0	39.371	29	9	10	1	9	446	50.7	8.06	36.15	9.60723	10.5461	9.81255	10.5599	10.4064	10.6438	10.3676	10.7978	9.75647	10.7342	REACTOME_BRANCHED_CHAIN_AMINO_ACID_CATABOLISM|REACTOME_GLYOXYLATE_METABOLISM_AND_GLYCINE_DEGRADATION|REACTOME_METABOLISM_OF_AMINO_ACIDS_AND_DERIVATIVES
A0A3Q4EI12	Isoform of P35293, Ras-related protein Rab-18 OS=Mus musculus OX=10090 GN=Rab18 PE=1 SV=1	Rab18	0.662956	0.00579531	0.0543947		0	57.017	51	9	20	0	9	212	23.8	5.25	68.14	11.7098	12.8617	11.9896	12.5866	12.2483	12.7605	12.2972	12.7989	12.0234	12.5754	REACTOME_COPI_INDEPENDENT_GOLGI_TO_ER_RETROGRADE_TRAFFIC|REACTOME_GOLGI_TO_ER_RETROGRADE_TRANSPORT|REACTOME_INNATE_IMMUNE_SYSTEM|REACTOME_INTRA_GOLGI_AND_RETROGRADE_GOLGI_TO_ER_TRAFFIC|REACTOME_MEMBRANE_TRAFFICKING|REACTOME_NEUTROPHIL_DEGRANULATION|REACTOME_POST_TRANSLATIONAL_PROTEIN_MODIFICATION|REACTOME_RAB_GEFS_EXCHANGE_GTP_FOR_GDP_ON_RABS|REACTOME_RAB_GERANYLGERANYLATION|REACTOME_RAB_REGULATI…
P09103	Protein disulfide-isomerase OS=Mus musculus OX=10090 GN=P4hb PE=1 SV=2	P4hb	0.662746	0.0104353	0.0672811		0	201.373	58	29	116	20	28	509	57	4.88	386.55	14.471	15.6443	14.8105	15.3365	14.5349	15.2401	14.8666	15.4899	14.7608	15.0467	REACTOME_CELLULAR_RESPONSES_TO_EXTERNAL_STIMULI|REACTOME_CHYLOMICRON_ASSEMBLY|REACTOME_COLLAGEN_BIOSYNTHESIS_AND_MODIFYING_ENZYMES|REACTOME_COLLAGEN_FORMATION|REACTOME_CYTOKINE_SIGNALING_IN_IMMUNE_SYSTEM|REACTOME_DETOXIFICATION_OF_REACTIVE_OXYGEN_SPECIES|REACTOME_EXTRACELLULAR_MATRIX_ORGANIZATION|REACTOME_HEDGEHOG_LIGAND_BIOGENESIS|REACTOME_INTERLEUKIN_12_FAMILY_SIGNALING|REACTOME_INTERLEUKIN_12_…
E9Q456	Isoform of P58771, Tropomyosin alpha-1 chain OS=Mus musculus OX=10090 GN=Tpm1 PE=1 SV=1	Tpm1	0.662215	0.0425098	0.133612		0	279.347	68	42	510	0	3	248	28.7	4.77	1548.23	11.6593	13.1225	12.1848	12.9451	12.6463	12.8311	12.7798	13.0753	12.3603	12.9676	REACTOME_MUSCLE_CONTRACTION|REACTOME_SMOOTH_MUSCLE_CONTRACTION|REACTOME_STRIATED_MUSCLE_CONTRACTION
Q9CYT6	Adenylyl cyclase-associated protein 2 OS=Mus musculus OX=10090 GN=Cap2 PE=1 SV=1	Cap2	0.661644	0.00944523	0.0647879		0	130.134	44	17	59	0	16	476	52.8	6.43	193.38	13.1316	14.2972	13.4166	13.9112	13.2557	13.9959	13.4423	14.0089	13.4735	13.8148	REACTOME_DEVELOPMENTAL_BIOLOGY|REACTOME_NERVOUS_SYSTEM_DEVELOPMENT|REACTOME_ROLE_OF_ABL_IN_ROBO_SLIT_SIGNALING|REACTOME_SIGNALING_BY_ROBO_RECEPTORS
P61982	14-3-3 protein gamma OS=Mus musculus OX=10090 GN=Ywhag PE=1 SV=2	Ywhag	0.660713	0.00900757	0.0634395		0	108.876	69	17	95	10	10	247	28.3	4.89	270.71	13.4646	14.6364	13.7819	14.5132	13.8995	14.4298	14.0726	14.5456	13.8418	14.239	REACTOME_ACTIVATION_OF_BAD_AND_TRANSLOCATION_TO_MITOCHONDRIA_|REACTOME_ACTIVATION_OF_BH3_ONLY_PROTEINS|REACTOME_ANCHORING_OF_THE_BASAL_BODY_TO_THE_PLASMA_MEMBRANE|REACTOME_AURKA_ACTIVATION_BY_TPX2|REACTOME_CELL_CYCLE|REACTOME_CELL_CYCLE_CHECKPOINTS|REACTOME_CELL_CYCLE_MITOTIC|REACTOME_CHK1_CHK2_CDS1_MEDIATED_INACTIVATION_OF_CYCLIN_B_CDK1_COMPLEX|REACTOME_CILIUM_ASSEMBLY|REACTOME_FOXO_MEDIATED_TRA…
Q4KL52	Isoform of Q9DAZ9, Abscission/NoCut checkpoint regulator OS=Mus musculus OX=10090 GN=Zfyve19 PE=1 SV=1	Zfyve19	0.655933	0.0942707	0.20981		0.03	1.466	2	1	3	0	1	330	36.3	7.81	9.71	10.1705	10.9277	10.2298	11.8003	11.2153	11.0333	10.8067	11.0282	10.4355	11.348	NA
Q9WUZ7	SH3 domain-binding glutamic acid-rich protein OS=Mus musculus OX=10090 GN=Sh3bgr PE=1 SV=1	Sh3bgr	0.654937	0.0437183	0.13575		0	56.663	51	9	22	0	9	214	23.1	4.07	73.5	11.1253	12.588	11.6491	12.3698	12.0665	12.2179	12.1713	12.5091	11.7776	12.3797	NA
Q8VED5	Keratin, type II cytoskeletal 79 OS=Mus musculus OX=10090 GN=Krt79 PE=1 SV=2	Krt79	0.652277	0.0359527	0.121901		0	51.404	9	10	20	1	1	531	57.5	7.69	60.11	6.55936	7.60644	6.36972	7.3946	6.6895	6.71076	7.16822	7.45322	7.22024	8.1034	REACTOME_DEVELOPMENTAL_BIOLOGY|REACTOME_FORMATION_OF_THE_CORNIFIED_ENVELOPE|REACTOME_KERATINIZATION
F6XP16	Olfactory receptor OS=Mus musculus OX=10090 GN=Olfr1185-ps1 PE=3 SV=1	Olfr1185-ps1	0.649823	0.173465	0.308736		0.066	1.086	3	1	1	1	1	303	34.4	8.35	2.04	8.43262	8.32711	7.88602	9.88293	9.49206	9.40746	8.52384	8.96906	8.6154	9.61248	NA
P61080	Ubiquitin-conjugating enzyme E2 D1 OS=Mus musculus OX=10090 GN=Ube2d1 PE=1 SV=1	Ube2d1	0.649419	0.00545238	0.052607		0	13.438	24	3	3	2	2	147	16.6	7.42	11.5	8.6204	9.61553	8.83932	9.52506	9.31933	9.59226	9.09089	9.63796	8.7541	9.50034	REACTOME_ABERRANT_REGULATION_OF_MITOTIC_EXIT_IN_CANCER_DUE_TO_RB1_DEFECTS|REACTOME_ADAPTIVE_IMMUNE_SYSTEM|REACTOME_ANTIGEN_PROCESSING_UBIQUITINATION_PROTEASOME_DEGRADATION|REACTOME_APC_C_CDC20_MEDIATED_DEGRADATION_OF_CYCLIN_B|REACTOME_APC_C_CDH1_MEDIATED_DEGRADATION_OF_CDC20_AND_OTHER_APC_C_CDH1_TARGETED_PROTEINS_IN_LATE_MITOSIS_EARLY_G1|REACTOME_APC_C_MEDIATED_DEGRADATION_OF_CELL_CYCLE_PROTEINS|…
Q6PDM1	Male-specific lethal 1 homolog OS=Mus musculus OX=10090 GN=Msl1 PE=1 SV=1	Msl1	0.648791	0.0708908	0.178125		0.001	6.066	1	1	5	0	1	616	67.3	9	13.68	8.83043	9.57424	8.75998	10.3492	9.51955	9.59481	9.22712	9.4447	9.6071	10.2252	REACTOME_CHROMATIN_MODIFYING_ENZYMES|REACTOME_HATS_ACETYLATE_HISTONES
Q64521	Glycerol-3-phosphate dehydrogenase, mitochondrial OS=Mus musculus OX=10090 GN=Gpd2 PE=1 SV=2	Gpd2	0.648483	0.0565279	0.157133		0	298.495	67	41	151	1	41	727	80.9	6.61	547.94	14.3183	15.9313	15.0314	15.5241	15.2412	15.5479	15.4758	15.819	14.8978	15.3847	REACTOME_GLYCEROPHOSPHOLIPID_BIOSYNTHESIS|REACTOME_METABOLISM_OF_LIPIDS|REACTOME_PHOSPHOLIPID_METABOLISM|REACTOME_SYNTHESIS_OF_PA|REACTOME_TRIGLYCERIDE_CATABOLISM|REACTOME_TRIGLYCERIDE_METABOLISM
Q5DTJ9	Myopalladin OS=Mus musculus OX=10090 GN=Mypn PE=1 SV=2	Mypn	0.647371	0.0181068	0.0871175		0	177.24	30	28	61	22	28	1315	144	6.54	227.42	12.5456	13.831	12.9848	13.6714	13.1451	13.5537	13.3044	13.7312	13.0834	13.5128	NA
Q8BVF4	Coiled-coil domain-containing protein 30 OS=Mus musculus OX=10090 GN=Ccdc30 PE=1 SV=1	Ccdc30	0.645877	0.209946	0.34995		0.001	7.247	1	2	7	0	1	654	76	6.39	20.38	7.29268	8.01168	7.08947	9.37012	8.02309	8.28304	7.56848	7.40048	8.47306	8.61084	NA
Q9JHU4	Cytoplasmic dynein 1 heavy chain 1 OS=Mus musculus OX=10090 GN=Dync1h1 PE=1 SV=2	Dync1h1	0.645532	0.0208164	0.0924147		0	904.678	39	162	321	154	162	4644	531.7	6.42	1042.74	15.3495	16.6463	15.7951	16.2398	15.5625	16.2248	15.8772	16.4204	15.7969	16.0774	REACTOME_ADAPTIVE_IMMUNE_SYSTEM|REACTOME_AGGREPHAGY|REACTOME_ANCHORING_OF_THE_BASAL_BODY_TO_THE_PLASMA_MEMBRANE|REACTOME_ASPARAGINE_N_LINKED_GLYCOSYLATION|REACTOME_AURKA_ACTIVATION_BY_TPX2|REACTOME_AUTOPHAGY|REACTOME_CELL_CYCLE|REACTOME_CELL_CYCLE_CHECKPOINTS|REACTOME_CELL_CYCLE_MITOTIC|REACTOME_CELLULAR_RESPONSES_TO_EXTERNAL_STIMULI|REACTOME_CILIUM_ASSEMBLY|REACTOME_COPI_INDEPENDENT_GOLGI_TO_ER_…
Q9D8W7	OCIA domain-containing protein 2 OS=Mus musculus OX=10090 GN=Ociad2 PE=1 SV=1	Ociad2	0.644452	0.00836907	0.061614		0	11.281	18	3	6	0	3	154	16.9	9.41	13.57	9.4161	10.3926	9.57831	10.3876	9.98974	10.2999	9.93828	10.2877	9.77199	10.5489	NA
P35290	Ras-related protein Rab-24 OS=Mus musculus OX=10090 GN=Rab24 PE=1 SV=2	Rab24	0.644377	0.199707	0.338614		0.011	2.469	14	2	3	2	2	203	23.1	6.23	3.77	6.41812	8.64808	7.16209	7.8459	7.32617	7.4216	7.7454	7.59572	7.25894	7.62131	REACTOME_INNATE_IMMUNE_SYSTEM|REACTOME_NEUTROPHIL_DEGRANULATION|REACTOME_POST_TRANSLATIONAL_PROTEIN_MODIFICATION|REACTOME_RAB_GERANYLGERANYLATION
Q70IV5	Synemin OS=Mus musculus OX=10090 GN=Synm PE=1 SV=2	Synm	0.644325	0.0327209	0.115831		0	371.773	49	64	140	3	3	1561	173.1	5.12	481.73	13.7145	15.1027	14.2031	14.925	14.4061	14.8685	14.5348	14.9338	14.4726	14.7228	NA
Q8BJ13	Isoform of Q80ZF8, Adhesion G protein-coupled receptor B3 OS=Mus musculus OX=10090 GN=Adgrb3 PE=1 SV=1	Adgrb3	0.642266	0.026307	0.103013		0.001	4.648	1	2	21	0	1	652	73.2	6.86	48.46	10.4211	11.093	10.4972	11.4937	11.0597	11.0205	10.4513	11.0658	10.5058	11.4734	NA
Q9JIM1	Equilibrative nucleoside transporter 1 OS=Mus musculus OX=10090 GN=Slc29a1 PE=1 SV=3	Slc29a1	0.641891	0.0153717	0.0805955		0.001	7.047	3	1	1	0	1	460	50.2	8.31	4.85	7.57632	8.28351	7.59404	7.98719	7.46054	8.62883	7.38733	8.07947	8.0019	8.25058	REACTOME_SLC_MEDIATED_TRANSMEMBRANE_TRANSPORT|REACTOME_TRANSPORT_OF_NUCLEOSIDES_AND_FREE_PURINE_AND_PYRIMIDINE_BASES_ACROSS_THE_PLASMA_MEMBRANE|REACTOME_TRANSPORT_OF_SMALL_MOLECULES|REACTOME_TRANSPORT_OF_VITAMINS_NUCLEOSIDES_AND_RELATED_MOLECULES
Q8BSN9	FAST kinase domain-containing protein 3, mitochondrial OS=Mus musculus OX=10090 GN=Fastkd3 PE=2 SV=2	Fastkd3	0.637324	0.0185753	0.0881617		0.004	3.001	1	1	4	0	1	661	75.3	7.78	11.07	10.7086	11.6402	10.8429	11.8454	11.3659	11.4778	11.1313	11.5466	10.8444	11.5695	NA
P15626	Glutathione S-transferase Mu 2 OS=Mus musculus OX=10090 GN=Gstm2 PE=1 SV=2	Gstm2	0.630219	0.0586199	0.160438		0	132.988	78	21	76	3	12	218	25.7	7.39	239.69	13.125	14.5125	13.5657	14.5147	13.9582	14.1019	14.171	14.3205	13.5336	14.055	REACTOME_BIOLOGICAL_OXIDATIONS|REACTOME_BIOSYNTHESIS_OF_SPECIALIZED_PRORESOLVING_MEDIATORS_SPMS_|REACTOME_GLUTATHIONE_CONJUGATION|REACTOME_METABOLISM_OF_LIPIDS|REACTOME_PHASE_II_CONJUGATION_OF_COMPOUNDS
Q9JIQ3	Diablo IAP-binding mitochondrial protein OS=Mus musculus OX=10090 GN=Diablo PE=1 SV=2	Diablo	0.62764	0.00562067	0.0536551		0	17.435	21	5	7	2	5	237	26.8	6.37	19.21	9.70463	10.4597	9.82328	10.4134	9.79116	10.5527	9.81539	10.6534	10.0118	10.2053	REACTOME_APOPTOTIC_FACTOR_MEDIATED_RESPONSE|REACTOME_CYTOCHROME_C_MEDIATED_APOPTOTIC_RESPONSE|REACTOME_INTRINSIC_PATHWAY_FOR_APOPTOSIS|REACTOME_PROGRAMMED_CELL_DEATH|REACTOME_RELEASE_OF_APOPTOTIC_FACTORS_FROM_THE_MITOCHONDRIA|REACTOME_SMAC_XIAP_REGULATED_APOPTOTIC_RESPONSE
Q8BS95	Golgi pH regulator OS=Mus musculus OX=10090 GN=Gpr89 PE=1 SV=2	Gpr89	0.627622	0.00575035	0.054136		0.001	7.002	6	2	2	2	2	455	52.7	9.22	6.13	6.81535	7.08516	6.54989	7.2313	7.06673	7.55401	6.54385	7.28794	6.43904	7.39456	NA
Q8CCT4	Transcription elongation factor A protein-like 5 OS=Mus musculus OX=10090 GN=Tceal5 PE=1 SV=1	Tceal5	0.627553	0.004987	0.0506326		0	29.903	41	9	15	2	9	200	22	6.2	33.37	11.2666	12.222	11.4479	11.8484	11.0126	11.8159	11.2804	11.8765	11.192	11.5744	NA
A0A0G2JEB6	Cilia and flagella-associated protein 47 OS=Mus musculus OX=10090 GN=Cfap47 PE=1 SV=2	Cfap47	0.624854	0.0104639	0.0672811		0.065	1.091	0	1	1	0	1	3184	360.1	7.99	0	4.62105	4.88667	4.75237	5.21555	5.26655	6.04974	4.94348	5.49254	4.61028	5.6735	NA
Q61586	Glycerol-3-phosphate acyltransferase 1, mitochondrial OS=Mus musculus OX=10090 GN=Gpam PE=1 SV=2	Gpam	0.62453	0.00822022	0.0611103		0	26.64	10	7	9	2	7	827	93.6	7.84	30.02	10.0042	11.0164	10.2608	10.9468	10.7852	11.047	10.5837	11.0243	10.2014	10.9234	REACTOME_ACTIVATION_OF_GENE_EXPRESSION_BY_SREBF_SREBP_|REACTOME_ESR_MEDIATED_SIGNALING|REACTOME_ESTROGEN_DEPENDENT_GENE_EXPRESSION|REACTOME_GLYCEROPHOSPHOLIPID_BIOSYNTHESIS|REACTOME_METABOLISM_OF_LIPIDS|REACTOME_METABOLISM_OF_STEROIDS|REACTOME_PHOSPHOLIPID_METABOLISM|REACTOME_REGULATION_OF_CHOLESTEROL_BIOSYNTHESIS_BY_SREBP_SREBF_|REACTOME_RNA_POLYMERASE_II_TRANSCRIPTION|REACTOME_RUNX1_REGULATES_E…
A2AMM0	Caveolae-associated protein 4 OS=Mus musculus OX=10090 GN=Cavin4 PE=1 SV=1	Cavin4	0.62232	0.00954838	0.0650766		0	87.848	41	13	38	13	13	362	41	8.65	140.88	12.4208	13.5586	12.839	13.4654	12.9692	13.4142	13.0919	13.5483	12.8649	13.3108	NA
Q3U3X2	Isoform of P50540, Max-interacting protein 1 OS=Mus musculus OX=10090 GN=Mxi1 PE=1 SV=1	Mxi1	0.621317	0.0699765	0.17663		0.002	3.864	2	1	5	0	1	295	32.8	7.58	14.66	10.9006	11.4934	10.883	12.1168	11.8726	11.7123	11.4763	11.8267	10.9871	12.0768	NA
E9PYJ9	Isoform of Q9JKS4, LIM domain-binding protein 3 OS=Mus musculus OX=10090 GN=Ldb3 PE=1 SV=1	Ldb3	0.61554	0.0593383	0.161437		0	288.382	51	28	263	1	12	679	72.3	7.78	933.11	14.1438	15.605	14.7601	15.4701	15.2264	15.3347	15.36	15.6244	14.8618	15.3955	NA
Q9JLH8	Tropomodulin-4 OS=Mus musculus OX=10090 GN=Tmod4 PE=2 SV=1	Tmod4	0.611231	0.0647273	0.168713		0	89.728	34	14	59	5	13	345	39.2	4.84	185.4	12.5301	13.9932	13.1072	13.8316	13.5574	13.6431	13.7422	13.965	13.2482	13.8083	REACTOME_MUSCLE_CONTRACTION|REACTOME_STRIATED_MUSCLE_CONTRACTION
Q6IFX2	Keratin, type I cytoskeletal 42 OS=Mus musculus OX=10090 GN=Krt42 PE=1 SV=1	Krt42	0.610417	0.173386	0.30869		0	26.058	17	8	10	4	5	452	50.1	5.16	30.26	9.27021	10.0345	9.66193	11.6026	9.96746	9.78906	9.63594	9.71764	10.5121	10.9559	REACTOME_CELL_CELL_COMMUNICATION|REACTOME_CELL_JUNCTION_ORGANIZATION|REACTOME_DEVELOPMENTAL_BIOLOGY|REACTOME_FORMATION_OF_THE_CORNIFIED_ENVELOPE|REACTOME_KERATINIZATION|REACTOME_TYPE_I_HEMIDESMOSOME_ASSEMBLY
A0A571BD03	Isoform of Q8C494, Proline-rich protein 33 OS=Mus musculus OX=10090 GN=Prr33 PE=1 SV=1	Prr33	0.610232	0.105867	0.22454		0	34.121	25	8	15	2	8	440	47.2	10.02	37.07	10.6203	12.0492	11.2008	12.1313	12.1174	11.9469	12.0509	12.1127	11.5079	12.3085	NA
Q9D6F9	Tubulin beta-4A chain OS=Mus musculus OX=10090 GN=Tubb4a PE=1 SV=3	Tubb4a	0.60896	0.019467	0.0895975		0	156.093	57	17	108	1	1	444	49.6	4.88	400.41	7.55414	8.21959	7.55433	8.53983	8.36576	8.53636	8.16683	8.47643	7.64828	8.56192	REACTOME_ACTIVATION_OF_AMPK_DOWNSTREAM_OF_NMDARS|REACTOME_ACTIVATION_OF_NMDA_RECEPTORS_AND_POSTSYNAPTIC_EVENTS|REACTOME_ADAPTIVE_IMMUNE_SYSTEM|REACTOME_AGGREPHAGY|REACTOME_ANCHORING_OF_THE_BASAL_BODY_TO_THE_PLASMA_MEMBRANE|REACTOME_ASPARAGINE_N_LINKED_GLYCOSYLATION|REACTOME_ASSEMBLY_AND_CELL_SURFACE_PRESENTATION_OF_NMDA_RECEPTORS|REACTOME_AURKA_ACTIVATION_BY_TPX2|REACTOME_AUTOPHAGY|REACTOME_CARBO…
Q9WUB3	Glycogen phosphorylase, muscle form OS=Mus musculus OX=10090 GN=Pygm PE=1 SV=3	Pygm	0.607753	0.104434	0.223021		0	725.908	77	86	939	0	67	842	97.2	7.11	3009.15	16.766	18.5045	17.6109	18.152	17.8076	17.9514	18.0566	18.3034	17.6815	18.0503	REACTOME_GLYCOGEN_BREAKDOWN_GLYCOGENOLYSIS_|REACTOME_GLYCOGEN_METABOLISM|REACTOME_INNATE_IMMUNE_SYSTEM|REACTOME_METABOLISM_OF_CARBOHYDRATES|REACTOME_NEUTROPHIL_DEGRANULATION
V9GWW6	Isoform of Q5FW52, Muscular LMNA-interacting protein OS=Mus musculus OX=10090 GN=Mlip PE=1 SV=1	Mlip	0.607336	0.0104138	0.0672811		0	119.369	27	14	34	0	14	967	103.4	8.35	150.06	11.6767	12.7777	12.0682	12.7383	12.1812	12.663	12.3394	12.7363	12.1214	12.5083	NA
E9Q9K5	Triadin OS=Mus musculus OX=10090 GN=Trdn PE=1 SV=1	Trdn	0.606408	0.108287	0.227804		0	171.534	37	43	177	22	43	693	77.8	9.32	442.22	15.202	16.7795	15.7445	16.6605	16.243	16.1981	16.4737	16.5786	15.9557	16.4343	REACTOME_CARDIAC_CONDUCTION|REACTOME_ION_CHANNEL_TRANSPORT|REACTOME_ION_HOMEOSTASIS|REACTOME_MUSCLE_CONTRACTION|REACTOME_STIMULI_SENSING_CHANNELS|REACTOME_TRANSPORT_OF_SMALL_MOLECULES
Q9QY76	Vesicle-associated membrane protein-associated protein B OS=Mus musculus OX=10090 GN=Vapb PE=1 SV=3	Vapb	0.606174	0.00990562	0.0657666		0	88.087	56	13	41	0	12	243	26.9	7.78	123.32	12.1152	13.1928	12.4562	13.1243	12.6692	13.0011	12.8261	13.2325	12.5122	13.0589	REACTOME_METABOLISM_OF_LIPIDS|REACTOME_SPHINGOLIPID_DE_NOVO_BIOSYNTHESIS|REACTOME_SPHINGOLIPID_METABOLISM
Q5IRJ6	Zinc transporter 9 OS=Mus musculus OX=10090 GN=Slc30a9 PE=1 SV=2	Slc30a9	0.605611	0.0101086	0.0663684		0	18.438	9	4	5	0	4	567	62.8	8.69	15.51	9.6347	10.6748	9.87804	10.5656	10.2851	10.6322	10.3146	10.6291	10.0391	10.6779	NA
H3BKY5	Isoform of Q3UY23, Ferredoxin-fold anticodon-binding domain-containing protein 1 homolog (Fragment) OS=Mus musculus OX=10090 GN=Fdxacb1 PE=4 SV=1	Fdxacb1	0.605132	0.0810912	0.19236		0.01	2.508	6	1	1	0	1	117	13.4	8.48	2.78	7.67686	9.24906	8.06349	8.69848	8.51271	8.63217	8.5689	8.74903	8.21658	8.73546	NA
Q91W96	Anaphase-promoting complex subunit 4 OS=Mus musculus OX=10090 GN=Anapc4 PE=1 SV=1	Anapc4	0.60379	0.0909407	0.205096		0.001	9.388	5	2	2	1	2	807	91.6	5.4	8.28	7.65937	9.26777	8.09306	8.46119	8.01495	8.15711	8.86434	9.03279	7.84388	8.57568	REACTOME_ABERRANT_REGULATION_OF_MITOTIC_EXIT_IN_CANCER_DUE_TO_RB1_DEFECTS|REACTOME_ADAPTIVE_IMMUNE_SYSTEM|REACTOME_ANTIGEN_PROCESSING_UBIQUITINATION_PROTEASOME_DEGRADATION|REACTOME_APC_C_CDC20_MEDIATED_DEGRADATION_OF_CYCLIN_B|REACTOME_APC_C_CDH1_MEDIATED_DEGRADATION_OF_CDC20_AND_OTHER_APC_C_CDH1_TARGETED_PROTEINS_IN_LATE_MITOSIS_EARLY_G1|REACTOME_APC_C_MEDIATED_DEGRADATION_OF_CELL_CYCLE_PROTEINS|…
P27546	Microtubule-associated protein 4 OS=Mus musculus OX=10090 GN=Map4 PE=1 SV=3	Map4	0.600739	0.00609837	0.0544339		0	263.684	46	43	94	0	21	1125	117.4	4.98	293.91	12.6543	13.6578	12.8506	13.3758	12.6594	13.3014	12.779	13.2945	12.8759	13.1933	NA
Q9QYG0	Protein NDRG2 OS=Mus musculus OX=10090 GN=Ndrg2 PE=1 SV=1	Ndrg2	0.593869	0.0466772	0.140364		0	124.927	58	14	79	0	13	371	40.8	5.4	291.64	13.1339	14.5295	13.7097	14.3204	14.0417	14.308	14.174	14.4986	13.8499	14.222	NA
Q8R2H9	Phosphoethanolamine/phosphocholine phosphatase OS=Mus musculus OX=10090 GN=Phospho1 PE=1 SV=1	Phospho1	0.593229	0.00979484	0.0656115		0	27.969	25	6	10	1	6	267	29.9	7.94	24.88	10.0533	11.024	10.3565	11.0374	10.8083	11.0222	10.8429	11.27	10.4744	11.148	REACTOME_GLYCEROPHOSPHOLIPID_BIOSYNTHESIS|REACTOME_METABOLISM_OF_LIPIDS|REACTOME_PHOSPHOLIPID_METABOLISM|REACTOME_SYNTHESIS_OF_PC|REACTOME_SYNTHESIS_OF_PE
Q91Z83	Myosin-7 OS=Mus musculus OX=10090 GN=Myh7 PE=2 SV=1	Myh7	0.593002	0.0530076	0.151608		0	1539.39	66	181	2316	25	31	1935	222.7	5.76	8095.7	14.4797	15.7055	15.7088	16.6582	15.1611	15.2628	16.0209	16.5353	14.8716	15.0454	REACTOME_ANTI_INFLAMMATORY_RESPONSE_FAVOURING_LEISHMANIA_PARASITE_INFECTION|REACTOME_CD163_MEDIATING_AN_ANTI_INFLAMMATORY_RESPONSE|REACTOME_DEVELOPMENTAL_BIOLOGY|REACTOME_DISEASE|REACTOME_EPH_EPHRIN_SIGNALING|REACTOME_EPHA_MEDIATED_GROWTH_CONE_COLLAPSE|REACTOME_FCGAMMA_RECEPTOR_FCGR_DEPENDENT_PHAGOCYTOSIS|REACTOME_INFECTIOUS_DISEASE|REACTOME_INNATE_IMMUNE_SYSTEM|REACTOME_LEISHMANIA_INFECTION|REAC…
Q62234	Myomesin-1 OS=Mus musculus OX=10090 GN=Myom1 PE=1 SV=2	Myom1	0.59129	0.133519	0.259272		0	852.258	77	119	608	2	2	1667	185.3	6.16	2125.3	16.0856	17.8811	16.9384	17.5249	17.3433	17.3847	17.5479	17.7195	17.0776	17.4389	NA
P14231	Sodium/potassium-transporting ATPase subunit beta-2 OS=Mus musculus OX=10090 GN=Atp1b2 PE=1 SV=2	Atp1b2	0.587304	0.0409904	0.130855		0	26.419	20	5	12	4	5	290	33.3	8.31	41.23	10.4028	11.648	10.743	11.3431	11.2716	11.3517	11.2371	11.5472	10.9315	11.6324	REACTOME_BASIGIN_INTERACTIONS|REACTOME_CARDIAC_CONDUCTION|REACTOME_CELL_SURFACE_INTERACTIONS_AT_THE_VASCULAR_WALL|REACTOME_HEMOSTASIS|REACTOME_ION_CHANNEL_TRANSPORT|REACTOME_ION_HOMEOSTASIS|REACTOME_ION_TRANSPORT_BY_P_TYPE_ATPASES|REACTOME_MUSCLE_CONTRACTION|REACTOME_TRANSPORT_OF_SMALL_MOLECULES
P29788	Vitronectin OS=Mus musculus OX=10090 GN=Vtn PE=1 SV=2	Vtn	0.585534	0.0585705	0.160377		0	33.664	18	6	12	5	6	478	54.8	5.88	40.48	11.1258	11.7506	11.3721	11.6429	10.6447	11.926	10.7196	11.4968	11.0958	11.0693	REACTOME_COMPLEMENT_CASCADE|REACTOME_ECM_PROTEOGLYCANS|REACTOME_ELASTIC_FIBRE_FORMATION|REACTOME_EXTRACELLULAR_MATRIX_ORGANIZATION|REACTOME_INNATE_IMMUNE_SYSTEM|REACTOME_INTEGRIN_CELL_SURFACE_INTERACTIONS|REACTOME_MOLECULES_ASSOCIATED_WITH_ELASTIC_FIBRES|REACTOME_NON_INTEGRIN_MEMBRANE_ECM_INTERACTIONS|REACTOME_SYNDECAN_INTERACTIONS
Q8BLR9	Hypoxia-inducible factor 1-alpha inhibitor OS=Mus musculus OX=10090 GN=Hif1an PE=1 SV=2	Hif1an	0.584206	0.0124254	0.0725266		0	10.315	8	3	3	1	3	349	40.2	5.83	10.03	8.76555	9.69895	8.97414	9.56737	9.50665	9.709	9.32548	9.70097	8.83918	9.65574	REACTOME_CELLULAR_RESPONSE_TO_HYPOXIA|REACTOME_CELLULAR_RESPONSES_TO_EXTERNAL_STIMULI
Q8BIW1	Exopolyphosphatase PRUNE1 OS=Mus musculus OX=10090 GN=Prune1 PE=1 SV=1	Prune1	0.583528	0.013582	0.075647		0	47.397	23	8	14	8	8	454	50.2	5.11	49.4	10.969	12.0989	11.415	11.9217	11.5543	11.927	11.7298	12.1539	11.4454	11.9296	NA
Q9DB76	ER membrane protein complex subunit 9 OS=Mus musculus OX=10090 GN=Emc9 PE=1 SV=1	Emc9	0.580182	0.02854	0.107755		0.014	2.398	3	1	1	1	1	206	22.8	6.33	2.15	6.39683	6.66042	6.12738	6.70602	6.59885	6.78089	6.12572	6.85885	6.14932	7.29284	NA
E9PUE8	Isoform of P70170, ATP-binding cassette sub-family C member 9 OS=Mus musculus OX=10090 GN=Abcc9 PE=1 SV=1	Abcc9	0.579665	0.0256772	0.102173		0	48.007	9	13	18	0	13	1533	172.7	7.62	52.57	10.6381	11.7254	11.0301	11.6321	11.4499	11.6089	11.5358	11.8176	11.1285	11.8967	REACTOME_ABC_FAMILY_PROTEINS_MEDIATED_TRANSPORT|REACTOME_ABC_TRANSPORTER_DISORDERS|REACTOME_ARACHIDONIC_ACID_METABOLISM|REACTOME_BILE_ACID_AND_BILE_SALT_METABOLISM|REACTOME_CARDIAC_CONDUCTION|REACTOME_COBALAMIN_CBL_VITAMIN_B12_TRANSPORT_AND_METABOLISM|REACTOME_DISEASE|REACTOME_DISORDERS_OF_TRANSMEMBRANE_TRANSPORTERS|REACTOME_FATTY_ACID_METABOLISM|REACTOME_GLYCOSAMINOGLYCAN_METABOLISM|REACTOME_HEM…
E9Q557	Desmoplakin OS=Mus musculus OX=10090 GN=Dsp PE=1 SV=1	Dsp	0.578724	0.0557122	0.155947		0.03	1.452	0	1	1	1	1	2883	332.7	6.8	2.47	6.74669	7.88639	7.21304	7.95583	8.02218	7.98316	7.92411	8.12554	7.37668	8.22541	REACTOME_APOPTOTIC_CLEAVAGE_OF_CELL_ADHESION_PROTEINS|REACTOME_APOPTOTIC_CLEAVAGE_OF_CELLULAR_PROTEINS|REACTOME_APOPTOTIC_EXECUTION_PHASE|REACTOME_ASSEMBLY_OF_COLLAGEN_FIBRILS_AND_OTHER_MULTIMERIC_STRUCTURES|REACTOME_CASPASE_MEDIATED_CLEAVAGE_OF_CYTOSKELETAL_PROTEINS|REACTOME_CELL_CELL_COMMUNICATION|REACTOME_CELL_JUNCTION_ORGANIZATION|REACTOME_COLLAGEN_FORMATION|REACTOME_DEVELOPMENTAL_BIOLOGY|REA…
Q9JJW5	Myozenin-2 OS=Mus musculus OX=10090 GN=Myoz2 PE=1 SV=1	Myoz2	0.577742	0.0219748	0.0955101		0	59.096	36	8	25	8	8	264	29.7	8.51	82.51	11.515	12.5269	11.8943	12.7514	12.2499	12.7408	12.3338	12.7279	11.722	11.8568	NA
Q9JJL8	Serine--tRNA ligase, mitochondrial OS=Mus musculus OX=10090 GN=Sars2 PE=1 SV=2	Sars2	0.57632	0.0244315	0.100228		0	26.346	12	6	8	4	6	518	58.3	7.9	22.85	9.93145	11.0736	10.1698	10.7217	10.4584	10.7629	10.7285	10.941	10.2638	10.9342	REACTOME_MITOCHONDRIAL_TRNA_AMINOACYLATION|REACTOME_TRANSLATION|REACTOME_TRNA_AMINOACYLATION
Q9CZ44	NSFL1 cofactor p47 OS=Mus musculus OX=10090 GN=Nsfl1c PE=1 SV=1	Nsfl1c	0.575489	0.00742806	0.0594597		0	90.562	52	15	30	0	15	370	40.7	5.15	100.74	11.4533	12.4411	11.6553	12.2666	11.6832	12.2247	11.8814	12.3023	11.7563	12.0722	NA
Q91YJ5	Translation initiation factor IF-2, mitochondrial OS=Mus musculus OX=10090 GN=Mtif2 PE=1 SV=2	Mtif2	0.575205	0.0718178	0.179362		0	20.113	8	5	5	1	5	727	81.2	7.24	16.83	8.94405	10.2692	8.99105	9.88055	9.13144	9.31454	9.47955	9.52137	8.92728	9.36372	REACTOME_MITOCHONDRIAL_TRANSLATION|REACTOME_TRANSLATION
Q8CDC7	Zinc finger and BTB domain-containing protein 9 OS=Mus musculus OX=10090 GN=Zbtb9 PE=2 SV=1	Zbtb9	0.57364	0.00681573	0.0572711		0.02	1.84	3	1	1	1	1	459	49.5	7.03	1.96	5.86778	6.63864	6.23951	6.85336	6.80081	6.94573	6.43112	7.04123	6.20005	6.92851	NA
Q99JB8	Protein kinase C and casein kinase II substrate protein 3 OS=Mus musculus OX=10090 GN=Pacsin3 PE=1 SV=1	Pacsin3	0.57265	0.0110309	0.0685948		0	110.824	39	14	54	5	14	424	48.6	6.1	202.73	12.625	13.6457	12.9507	13.591	13.1288	13.5751	13.1995	13.7007	13.2264	13.4811	REACTOME_CLATHRIN_MEDIATED_ENDOCYTOSIS|REACTOME_MEMBRANE_TRAFFICKING|REACTOME_VESICLE_MEDIATED_TRANSPORT
B1AWH1	Isoform of Q3U269, Thiosulfate sulfurtransferase/rhodanese-like domain-containing protein 2 (Fragment) OS=Mus musculus OX=10090 GN=Tstd2 PE=1 SV=1	Tstd2	0.572471	0.0262334	0.102999		0.014	2.364	5	1	3	0	1	129	14.3	8.56	7.55	8.96812	10.144	9.43294	10.0027	9.5386	9.85867	9.67084	9.88944	9.40235	9.98043	NA
Q80WW9	DDRGK domain-containing protein 1 OS=Mus musculus OX=10090 GN=Ddrgk1 PE=1 SV=2	Ddrgk1	0.569073	0.0106064	0.0676407		0.001	4.765	3	1	2	0	1	315	36	5.35	6.01	7.64477	7.72365	7.44876	8.0438	7.3468	8.04135	7.42345	8.12989	7.35895	8.12941	NA
A0A0N4SVK8	Isoform of Q8BGK2, [Protein ADP-ribosylarginine] hydrolase-like protein 1 OS=Mus musculus OX=10090 GN=Adprhl1 PE=1 SV=1	Adprhl1	0.566785	0.0104009	0.0672811		0	71.037	9	12	16	2	2	1697	184.1	7.66	63.19	10.911	11.8606	11.1821	11.7141	11.1681	11.8529	11.2928	11.7676	11.0956	11.2883	NA
Q78IS1	Transmembrane emp24 domain-containing protein 3 OS=Mus musculus OX=10090 GN=Tmed3 PE=1 SV=1	Tmed3	0.566183	0.104993	0.223389		0.009	2.6	5	1	1	1	1	221	25.4	5.96	2.33	6.68893	7.3233	6.61987	7.93732	7.04149	7.58909	7.5304	7.15782	6.79276	7.49682	REACTOME_ASPARAGINE_N_LINKED_GLYCOSYLATION|REACTOME_COPI_DEPENDENT_GOLGI_TO_ER_RETROGRADE_TRAFFIC|REACTOME_COPI_MEDIATED_ANTEROGRADE_TRANSPORT|REACTOME_ER_TO_GOLGI_ANTEROGRADE_TRANSPORT|REACTOME_GOLGI_TO_ER_RETROGRADE_TRANSPORT|REACTOME_INTRA_GOLGI_AND_RETROGRADE_GOLGI_TO_ER_TRAFFIC|REACTOME_MEMBRANE_TRAFFICKING|REACTOME_POST_TRANSLATIONAL_PROTEIN_MODIFICATION|REACTOME_TRANSPORT_TO_THE_GOLGI_AND_…
Q8C7B8	Zinc finger SWIM domain-containing protein 4 OS=Mus musculus OX=10090 GN=Zswim4 PE=1 SV=2	Zswim4	0.564393	0.161449	0.294527		0.06	1.137	1	1	2	1	1	1101	122.4	7.28	4.22	8.16709	9.9724	8.66235	9.29088	8.89367	8.87969	9.07963	9.17358	8.77273	9.08089	NA
A0A0A6YXS7	Isoform of P63248, cAMP-dependent protein kinase inhibitor alpha (Fragment) OS=Mus musculus OX=10090 GN=Pkia PE=1 SV=1	Pkia	0.564264	0.0168728	0.0844247		0	21.045	58	2	7	0	2	50	5.3	5.87	27.93	9.71216	10.5562	10.0295	10.6935	10.325	10.4823	10.4255	10.7254	9.85107	10.7072	NA
A2CEK3	Isoform of Q9D0F9, Phosphoglucomutase-1 OS=Mus musculus OX=10090 GN=Pgm1 PE=1 SV=1	Pgm1	0.56358	0.0125325	0.0729043		0	295.596	63	40	227	3	3	580	63.7	5.72	812.58	8.88175	9.66982	9.10493	9.83636	9.78504	9.91043	9.5	9.89926	9.20221	9.97596	REACTOME_DISEASE|REACTOME_DISEASES_ASSOCIATED_WITH_GLYCOSYLATION_PRECURSOR_BIOSYNTHESIS|REACTOME_DISEASES_OF_GLYCOSYLATION|REACTOME_DISEASES_OF_METABOLISM|REACTOME_GLYCOGEN_METABOLISM|REACTOME_GLYCOGEN_SYNTHESIS|REACTOME_INNATE_IMMUNE_SYSTEM|REACTOME_METABOLISM_OF_CARBOHYDRATES|REACTOME_NEUTROPHIL_DEGRANULATION
Q62507	Cochlin OS=Mus musculus OX=10090 GN=Coch PE=1 SV=2	Coch	0.554885	0.312641	0.456035		0.009	2.538	1	1	3	1	1	552	59.9	8.44	8.54	8.74145	8.38168	8.56742	8.49885	8.87122	8.67064	9.02657	10.4157	8.71908	10.7332	NA
Q8K3R3	1-phosphatidylinositol 4,5-bisphosphate phosphodiesterase delta-4 OS=Mus musculus OX=10090 GN=Plcd4 PE=1 SV=2	Plcd4	0.554619	0.0139155	0.0764187		0	79.122	26	14	23	0	14	807	92.6	5.12	83.43	10.9552	11.9754	11.2459	11.8398	11.5123	11.8038	11.5924	11.8933	11.5147	12.0811	REACTOME_INOSITOL_PHOSPHATE_METABOLISM|REACTOME_SYNTHESIS_OF_IP3_AND_IP4_IN_THE_CYTOSOL
A0A5F8MQC8	Isoform of Q9CY27, Very-long-chain enoyl-CoA reductase OS=Mus musculus OX=10090 GN=Tecr PE=1 SV=1	Tecr	0.553987	0.0439423	0.136087		0	85.734	35	13	48	0	1	342	39.7	9.6	152.49	13.1668	14.4477	13.5877	14.1845	13.8601	14.1617	13.9955	14.2844	13.7349	14.0366	REACTOME_FATTY_ACID_METABOLISM|REACTOME_FATTY_ACYL_COA_BIOSYNTHESIS|REACTOME_METABOLISM_OF_LIPIDS|REACTOME_SYNTHESIS_OF_VERY_LONG_CHAIN_FATTY_ACYL_COAS
P63017	Heat shock cognate 71 kDa protein OS=Mus musculus OX=10090 GN=Hspa8 PE=1 SV=1	Hspa8	0.552691	0.0396388	0.128848		0	384.289	64	49	316	1	32	646	70.8	5.52	1052.6	15.5418	16.7719	15.9713	16.5477	15.8216	16.3001	16.1862	16.5088	16.0277	16.1836	REACTOME_ADAPTIVE_IMMUNE_SYSTEM|REACTOME_ANTIGEN_PRESENTATION_FOLDING_ASSEMBLY_AND_PEPTIDE_LOADING_OF_CLASS_I_MHC|REACTOME_ATF6_ATF6_ALPHA_ACTIVATES_CHAPERONE_GENES|REACTOME_ATF6_ATF6_ALPHA_ACTIVATES_CHAPERONES|REACTOME_ATTENUATION_PHASE|REACTOME_AUF1_HNRNP_D0_BINDS_AND_DESTABILIZES_MRNA|REACTOME_AUTOPHAGY|REACTOME_CELL_CYCLE|REACTOME_CELLULAR_RESPONSE_TO_HEAT_STRESS|REACTOME_CELLULAR_RESPONSES_T…
E9Q8K5	Isoform of A2ASS6, Titin OS=Mus musculus OX=10090 GN=Ttn PE=1 SV=1	Ttn	0.549044	0.0598034	0.1621		0	16460.4	71	2336	11812	0	3	33467	3713.7	6.37	41330.3	11.0638	11.7768	11.2034	11.9922	11.9965	11.8772	11.749	12.0284	11.1441	12.2275	REACTOME_CELL_DEATH_SIGNALLING_VIA_NRAGE_NRIF_AND_NADE|REACTOME_DEATH_RECEPTOR_SIGNALLING|REACTOME_G_ALPHA_12_13_SIGNALLING_EVENTS|REACTOME_HEMOSTASIS|REACTOME_MUSCLE_CONTRACTION|REACTOME_NEDDYLATION|REACTOME_NRAGE_SIGNALS_DEATH_THROUGH_JNK|REACTOME_P75_NTR_RECEPTOR_MEDIATED_SIGNALLING|REACTOME_PLATELET_ACTIVATION_SIGNALING_AND_AGGREGATION|REACTOME_POST_TRANSLATIONAL_PROTEIN_MODIFICATION|REACTOME…
E9PW03	Isoform of Q9WTK3, Glycosylphosphatidylinositol anchor attachment 1 protein OS=Mus musculus OX=10090 GN=Gpaa1 PE=1 SV=1	Gpaa1	0.545251	0.0234356	0.0983481		0	17.968	7	5	5	0	5	561	61.4	8.1	13.54	9.68742	10.7669	10.0329	10.6088	10.3877	10.5623	10.4033	10.7405	10.0457	10.6048	REACTOME_ATTACHMENT_OF_GPI_ANCHOR_TO_UPAR|REACTOME_POST_TRANSLATIONAL_MODIFICATION_SYNTHESIS_OF_GPI_ANCHORED_PROTEINS|REACTOME_POST_TRANSLATIONAL_PROTEIN_MODIFICATION
E9Q2W9	Isoform of P57780, Alpha-actinin-4 (Fragment) OS=Mus musculus OX=10090 GN=Actn4 PE=1 SV=1	Actn4	0.541597	0.00581781	0.0543947		0	265.456	62	32	162	1	1	518	59.9	6.01	597.31	7.18238	7.48409	7.06086	7.51257	6.92879	7.82606	6.94456	7.39846	6.91734	7.52074	REACTOME_ACTIVATION_OF_NMDA_RECEPTORS_AND_POSTSYNAPTIC_EVENTS|REACTOME_ASSEMBLY_AND_CELL_SURFACE_PRESENTATION_OF_NMDA_RECEPTORS|REACTOME_CELL_CELL_COMMUNICATION|REACTOME_CELL_EXTRACELLULAR_MATRIX_INTERACTIONS|REACTOME_CELL_JUNCTION_ORGANIZATION|REACTOME_CREB1_PHOSPHORYLATION_THROUGH_NMDA_RECEPTOR_MEDIATED_ACTIVATION_OF_RAS_SIGNALING|REACTOME_CYTOKINE_SIGNALING_IN_IMMUNE_SYSTEM|REACTOME_EXTRACELLU…
Q812A3	Ankyrin repeat domain-containing protein 23 OS=Mus musculus OX=10090 GN=Ankrd23 PE=2 SV=1	Ankrd23	0.539466	0.0127639	0.0735108		0	19.508	20	5	6	0	5	306	34.3	9.01	16.95	8.91507	9.94577	8.97753	9.48639	9.086	9.51869	9.22712	9.57824	9.22275	9.5967	REACTOME_METABOLISM_OF_LIPIDS|REACTOME_REGULATION_OF_LIPID_METABOLISM_BY_PPARALPHA
Q9D0F9	Phosphoglucomutase-1 OS=Mus musculus OX=10090 GN=Pgm1 PE=1 SV=4	Pgm1	0.53869	0.0874451	0.200579		0	306.478	66	42	259	5	5	562	61.4	6.57	893.44	14.971	16.4255	15.6343	16.185	15.8405	15.9818	16.0528	16.2675	15.6504	15.9825	REACTOME_DISEASE|REACTOME_DISEASES_ASSOCIATED_WITH_GLYCOSYLATION_PRECURSOR_BIOSYNTHESIS|REACTOME_DISEASES_OF_GLYCOSYLATION|REACTOME_DISEASES_OF_METABOLISM|REACTOME_GLYCOGEN_METABOLISM|REACTOME_GLYCOGEN_SYNTHESIS|REACTOME_INNATE_IMMUNE_SYSTEM|REACTOME_METABOLISM_OF_CARBOHYDRATES|REACTOME_NEUTROPHIL_DEGRANULATION
Q8R5A0	N-lysine methyltransferase SMYD2 OS=Mus musculus OX=10090 GN=Smyd2 PE=1 SV=1	Smyd2	0.535527	0.0214018	0.0940245		0	45.351	24	9	16	9	9	433	49.5	6.95	50.47	10.895	11.9766	11.1903	11.7566	11.7078	11.9593	11.5633	11.9114	11.1743	11.6044	REACTOME_CHROMATIN_MODIFYING_ENZYMES|REACTOME_PKMTS_METHYLATE_HISTONE_LYSINES|REACTOME_REGULATION_OF_TP53_ACTIVITY|REACTOME_REGULATION_OF_TP53_ACTIVITY_THROUGH_METHYLATION|REACTOME_RNA_POLYMERASE_II_TRANSCRIPTION|REACTOME_TRANSCRIPTIONAL_REGULATION_BY_TP53
Q8K273	ER membrane protein complex subunit 5 OS=Mus musculus OX=10090 GN=Mmgt1 PE=1 SV=1	Mmgt1	0.53548	0.026775	0.103951		0.001	8.212	18	1	1	1	1	131	14.7	9.16	7.43	8.24035	8.2491	7.92824	8.47992	8.05783	8.51227	7.9574	8.66418	7.82696	8.7827	REACTOME_MISCELLANEOUS_TRANSPORT_AND_BINDING_EVENTS|REACTOME_TRANSPORT_OF_SMALL_MOLECULES
J3QPC8	Isoform of O88346, Troponin T, slow skeletal muscle OS=Mus musculus OX=10090 GN=Tnnt1 PE=1 SV=1	Tnnt1	0.534807	0.0354845	0.121201		0	97.1	38	15	168	0	10	261	31.3	6.39	415.39	12.0016	12.9289	12.9494	13.8162	12.1807	12.4984	12.9669	13.5193	11.9232	11.9331	REACTOME_MUSCLE_CONTRACTION|REACTOME_STRIATED_MUSCLE_CONTRACTION
P04104	Keratin, type II cytoskeletal 1 OS=Mus musculus OX=10090 GN=Krt1 PE=1 SV=4	Krt1	0.53338	0.433534	0.572715		0	41.853	7	8	18	3	3	637	65.6	8.15	66.52	10.4244	11.7854	10.2853	12.4726	11.0614	10.0567	10.5378	9.79608	11.4395	12.3045	REACTOME_DEVELOPMENTAL_BIOLOGY|REACTOME_FORMATION_OF_THE_CORNIFIED_ENVELOPE|REACTOME_INNATE_IMMUNE_SYSTEM|REACTOME_KERATINIZATION|REACTOME_NEUTROPHIL_DEGRANULATION
A0A1L1SQ51	Isoform of Q71LX4, Talin-2 OS=Mus musculus OX=10090 GN=Tln2 PE=1 SV=1	Tln2	0.532767	0.0253623	0.101604		0	334.713	28	62	99	0	48	2544	271.8	5.57	305.04	13.1993	14.307	13.6044	14.0593	13.5514	14.0367	13.7311	14.1595	13.6698	13.8574	REACTOME_CYTOKINE_SIGNALING_IN_IMMUNE_SYSTEM|REACTOME_DEVELOPMENTAL_BIOLOGY|REACTOME_DISEASE|REACTOME_DISEASES_OF_SIGNAL_TRANSDUCTION_BY_GROWTH_FACTOR_RECEPTORS_AND_SECOND_MESSENGERS|REACTOME_FLT3_SIGNALING|REACTOME_GRB2_SOS_PROVIDES_LINKAGE_TO_MAPK_SIGNALING_FOR_INTEGRINS_|REACTOME_HEMOSTASIS|REACTOME_INTEGRIN_SIGNALING|REACTOME_IRE1ALPHA_ACTIVATES_CHAPERONES|REACTOME_MAP2K_AND_MAPK_ACTIVATION|R…
J3QPY3	Fas apoptotic inhibitory molecule-like OS=Mus musculus OX=10090 GN=Faiml PE=4 SV=1	Faiml	0.531275	0.0563021	0.156868		0.001	5.521	15	2	2	1	2	178	20	7.84	3.23	5.4364	5.41651	5.32391	5.79739	5.3695	5.6893	5.08177	5.79032	5.02208	6.19651	NA
Q9Z2T6	Keratin, type II cuticular Hb5 OS=Mus musculus OX=10090 GN=Krt85 PE=1 SV=2	Krt85	0.531259	0.236798	0.380366		0	32.374	17	9	20	2	2	507	55.7	6.42	64.85	9.66506	11.058	9.78408	10.9758	10.0107	9.81429	10.2975	9.76203	10.5062	11.3098	REACTOME_DEVELOPMENTAL_BIOLOGY|REACTOME_FORMATION_OF_THE_CORNIFIED_ENVELOPE|REACTOME_KERATINIZATION
K3W4N7	Isoform of Q9JJV9, Sodium channel protein OS=Mus musculus OX=10090 GN=Scn5a PE=1 SV=1	Scn5a	0.530433	0.198537	0.337416		0.025	1.617	0	1	1	0	1	2020	227.6	5.63	0	7.36641	9.19678	8.02675	8.6723	8.27159	8.30669	8.58655	8.61764	8.13623	8.24627	REACTOME_CARDIAC_CONDUCTION|REACTOME_DEVELOPMENTAL_BIOLOGY|REACTOME_INTERACTION_BETWEEN_L1_AND_ANKYRINS|REACTOME_L1CAM_INTERACTIONS|REACTOME_MUSCLE_CONTRACTION|REACTOME_NERVOUS_SYSTEM_DEVELOPMENT|REACTOME_PHASE_0_RAPID_DEPOLARISATION
P98192	Dihydroxyacetone phosphate acyltransferase OS=Mus musculus OX=10090 GN=Gnpat PE=1 SV=1	Gnpat	0.528595	0.00937456	0.0644869		0.001	9.391	4	2	2	1	2	678	76.8	8.13	5.91	8.60832	9.55362	8.81515	9.3512	8.96881	9.24862	9.13872	9.54065	8.73815	9.21804	REACTOME_GLYCEROPHOSPHOLIPID_BIOSYNTHESIS|REACTOME_METABOLISM_OF_LIPIDS|REACTOME_PEROXISOMAL_PROTEIN_IMPORT|REACTOME_PHOSPHOLIPID_METABOLISM|REACTOME_PROTEIN_LOCALIZATION|REACTOME_SYNTHESIS_OF_PA|REACTOME_WAX_AND_PLASMALOGEN_BIOSYNTHESIS
Q91W50	Cold shock domain-containing protein E1 OS=Mus musculus OX=10090 GN=Csde1 PE=1 SV=1	Csde1	0.526196	0.00623815	0.0549347		0	98.645	25	18	29	0	18	798	88.7	6.37	96.72	12.254	13.1751	12.4878	12.9219	12.464	12.9354	12.5028	12.9337	12.4108	12.7842	NA
Q8CGI1	Protein FAM193A OS=Mus musculus OX=10090 GN=Fam193a PE=1 SV=2	Fam193a	0.523672	0.080343	0.191429		0.009	2.591	0	1	2	0	1	1231	136.6	6.47	4.78	8.93406	10.3434	9.43335	9.81394	9.35127	9.74135	9.707	9.96564	9.55496	9.73472	NA
G5E8R3	Isoform of Q05920, Pyruvate carboxylase OS=Mus musculus OX=10090 GN=Pcx PE=1 SV=1	Pcx	0.523232	0.0402918	0.130263		0	218.279	39	36	71	0	36	1178	129.6	6.71	247.97	12.9353	14.1362	13.5384	14.0417	13.7385	14.0302	13.7452	14.1187	13.3552	13.6021	REACTOME_BIOTIN_TRANSPORT_AND_METABOLISM|REACTOME_DEFECTS_IN_BIOTIN_BTN_METABOLISM|REACTOME_DEFECTS_IN_VITAMIN_AND_COFACTOR_METABOLISM|REACTOME_DISEASE|REACTOME_DISEASES_OF_METABOLISM|REACTOME_GLUCONEOGENESIS|REACTOME_GLUCOSE_METABOLISM|REACTOME_METABOLISM_OF_CARBOHYDRATES|REACTOME_METABOLISM_OF_VITAMINS_AND_COFACTORS|REACTOME_METABOLISM_OF_WATER_SOLUBLE_VITAMINS_AND_COFACTORS
Q80W54	CAAX prenyl protease 1 homolog OS=Mus musculus OX=10090 GN=Zmpste24 PE=1 SV=2	Zmpste24	0.522756	0.0060632	0.0544339		0	48.226	16	7	13	7	7	475	54.7	6.95	50.77	11.1169	12.0023	11.3494	11.6869	11.2993	11.8474	11.4426	11.9236	11.3857	11.7475	NA
A2BFF8	Isoform of O88487, Cytoplasmic dynein 1 intermediate chain 2 OS=Mus musculus OX=10090 GN=Dync1i2 PE=1 SV=1	Dync1i2	0.522591	0.0137716	0.0759816		0	50.724	22	8	13	0	8	611	68.2	5.29	50.27	10.9348	11.9446	11.1447	11.6226	11.1505	11.5883	11.3285	11.667	11.1856	11.5345	REACTOME_ADAPTIVE_IMMUNE_SYSTEM|REACTOME_AGGREPHAGY|REACTOME_ANCHORING_OF_THE_BASAL_BODY_TO_THE_PLASMA_MEMBRANE|REACTOME_ASPARAGINE_N_LINKED_GLYCOSYLATION|REACTOME_AURKA_ACTIVATION_BY_TPX2|REACTOME_AUTOPHAGY|REACTOME_CELL_CYCLE|REACTOME_CELL_CYCLE_CHECKPOINTS|REACTOME_CELL_CYCLE_MITOTIC|REACTOME_CELLULAR_RESPONSES_TO_EXTERNAL_STIMULI|REACTOME_CILIUM_ASSEMBLY|REACTOME_COPI_INDEPENDENT_GOLGI_TO_ER_…
Q6TEK5	Vitamin K epoxide reductase complex subunit 1-like protein 1 OS=Mus musculus OX=10090 GN=Vkorc1l1 PE=1 SV=1	Vkorc1l1	0.520315	0.00603486	0.0544339		0	7.415	11	2	2	0	2	176	19.8	8.95	6.83	7.02454	7.65749	6.97375	7.63838	7.60032	7.77954	7.27652	7.70029	7.00605	7.70706	REACTOME_METABOLISM_OF_FAT_SOLUBLE_VITAMINS|REACTOME_METABOLISM_OF_VITAMINS_AND_COFACTORS
E9Q8T1	Isoform of Q9JJG0, Transforming acidic coiled-coil-containing protein 2 OS=Mus musculus OX=10090 GN=Tacc2 PE=1 SV=1	Tacc2	0.517949	0.00575349	0.054136		0	119.198	15	22	32	0	6	2879	305	4.79	119.42	10.6241	11.4965	10.9632	11.4756	11.0348	11.4202	11.1239	11.4377	10.8744	11.3802	NA
Q8R0P4	Mth938 domain-containing protein OS=Mus musculus OX=10090 GN=Aamdc PE=1 SV=1	Aamdc	0.5166	0.0250043	0.101267		0	34.448	51	6	16	0	6	122	13.2	7.99	53.73	11.2417	12.3191	11.6168	12.1458	11.8995	12.1536	11.9518	12.2625	11.6586	12.0705	NA
P58500	MAP3K7 C-terminal-like protein OS=Mus musculus OX=10090 GN=Map3k7cl PE=2 SV=1	Map3k7cl	0.515473	0.00521023	0.0514837		0	10.301	13	1	1	1	1	142	16.3	4.86	5.26	6.24639	6.9416	6.24894	7.01522	6.68246	6.96089	6.48674	6.94666	6.58332	6.96084	NA
Q9CY18	Sorting nexin-7 OS=Mus musculus OX=10090 GN=Snx7 PE=1 SV=1	Snx7	0.511922	0.22653	0.369479		0.004	3.306	5	2	3	0	2	387	45	5.07	3.32	7.92114	7.69693	7.84253	7.93539	8.04412	8.00248	7.94051	9.0981	7.83781	9.41283	NA
Q9ERE2	Keratin, type II cuticular Hb1 OS=Mus musculus OX=10090 GN=Krt81 PE=2 SV=2	Krt81	0.511565	0.291774	0.4367		0	70.715	30	15	28	0	5	481	52.8	5.76	88.68	11.3538	11.9482	11.2674	12.7782	11.1402	11.3718	12.0535	11.1271	11.0505	12.1979	REACTOME_DEVELOPMENTAL_BIOLOGY|REACTOME_FORMATION_OF_THE_CORNIFIED_ENVELOPE|REACTOME_KERATINIZATION
Q9D952	Envoplakin OS=Mus musculus OX=10090 GN=Evpl PE=1 SV=3	Evpl	0.51101	0.0861813	0.198536		0.03	1.456	0	1	1	1	1	2035	231.9	6.6	2.83	7.66245	8.65129	7.92882	8.76232	8.73739	8.58093	8.47735	8.58198	8.06859	8.85314	REACTOME_ADAPTIVE_IMMUNE_SYSTEM|REACTOME_BUTYROPHILIN_BTN_FAMILY_INTERACTIONS|REACTOME_DEVELOPMENTAL_BIOLOGY|REACTOME_FORMATION_OF_THE_CORNIFIED_ENVELOPE|REACTOME_KERATINIZATION
Q8R086	Sulfite oxidase, mitochondrial OS=Mus musculus OX=10090 GN=Suox PE=1 SV=2	Suox	0.50839	0.0167575	0.0842725		0	75.595	30	11	19	11	11	546	60.7	6.54	79.89	11.2779	12.2369	11.5864	12.2093	11.9586	12.2538	12.0132	12.2859	11.6651	12.0572	REACTOME_DEGRADATION_OF_CYSTEINE_AND_HOMOCYSTEINE|REACTOME_METABOLISM_OF_AMINO_ACIDS_AND_DERIVATIVES|REACTOME_SULFIDE_OXIDATION_TO_SULFATE|REACTOME_SULFUR_AMINO_ACID_METABOLISM
E9Q264	Myosin, heavy chain 15 OS=Mus musculus OX=10090 GN=Myh15 PE=1 SV=1	Myh15	0.508337	0.00510574	0.0511107		0	60.441	4	10	88	3	3	1925	221.7	6.13	333.11	6.79285	7.26748	6.96348	7.77301	7.2053	7.53182	7.45211	7.77926	6.92621	7.53005	REACTOME_ANTI_INFLAMMATORY_RESPONSE_FAVOURING_LEISHMANIA_PARASITE_INFECTION|REACTOME_CD163_MEDIATING_AN_ANTI_INFLAMMATORY_RESPONSE|REACTOME_DEVELOPMENTAL_BIOLOGY|REACTOME_DISEASE|REACTOME_EPH_EPHRIN_SIGNALING|REACTOME_EPHA_MEDIATED_GROWTH_CONE_COLLAPSE|REACTOME_FCGAMMA_RECEPTOR_FCGR_DEPENDENT_PHAGOCYTOSIS|REACTOME_INFECTIOUS_DISEASE|REACTOME_INNATE_IMMUNE_SYSTEM|REACTOME_LEISHMANIA_INFECTION|REAC…
G3UWS1	Isoform of A0A571BF58, Nebulin (Fragment) OS=Mus musculus OX=10090 GN=Neb PE=1 SV=1	Neb	0.507018	0.0353442	0.120931		0	199.823	70	27	125	1	1	342	40.6	9.55	434.24	8.82786	9.70676	9.05435	9.72535	9.78644	9.754	9.47475	9.79628	9.16025	9.85635	REACTOME_MUSCLE_CONTRACTION|REACTOME_STRIATED_MUSCLE_CONTRACTION
Q8VHW3	Voltage-dependent calcium channel gamma-6 subunit OS=Mus musculus OX=10090 GN=Cacng6 PE=1 SV=1	Cacng6	0.506928	0.0563067	0.156868		0	11.957	12	3	3	0	3	260	28.1	8.47	9.14	8.41946	9.02073	8.51223	9.07135	9.21984	9.13664	8.88956	9.2527	8.72681	9.82114	REACTOME_CARDIAC_CONDUCTION|REACTOME_MUSCLE_CONTRACTION|REACTOME_PHASE_0_RAPID_DEPOLARISATION|REACTOME_PHASE_2_PLATEAU_PHASE
Q9CPQ9	Isoform of A6ZI46, Fructose-bisphosphate aldolase OS=Mus musculus OX=10090 GN=Aldoart1 PE=1 SV=1	Aldoart1	0.504771	0.026268	0.103013		0	286.836	56	31	483	0	4	364	39.3	7.37	1561.38	9.47557	10.2983	9.72825	10.4083	10.3363	10.3241	10.2174	10.6095	9.70518	10.3463	REACTOME_GLUCONEOGENESIS|REACTOME_GLUCOSE_METABOLISM|REACTOME_GLYCOLYSIS|REACTOME_HEMOSTASIS|REACTOME_INNATE_IMMUNE_SYSTEM|REACTOME_METABOLISM_OF_CARBOHYDRATES|REACTOME_NEUTROPHIL_DEGRANULATION|REACTOME_PLATELET_ACTIVATION_SIGNALING_AND_AGGREGATION|REACTOME_RESPONSE_TO_ELEVATED_PLATELET_CYTOSOLIC_CA2_
F7CC56	Isoform of Q9ESK9, RB1-inducible coiled-coil protein 1 (Fragment) OS=Mus musculus OX=10090 GN=Rb1cc1 PE=1 SV=1	Rb1cc1	0.503485	0.228805	0.371431		0.001	7.688	2	4	4	0	3	1468	168.9	5.52	8.42	8.81343	9.68677	8.88949	10.595	9.52619	9.27921	9.21083	9.17236	9.53293	9.75697	REACTOME_AUTOPHAGY
Q8CE90	Dual specificity mitogen-activated protein kinase kinase 7 OS=Mus musculus OX=10090 GN=Map2k7 PE=1 SV=1	Map2k7	0.503188	0.00667788	0.0568775		0.011	2.469	1	1	2	0	1	535	59.3	9.11	2.3	8.28384	8.6862	8.20754	8.87816	8.63845	8.93573	8.48536	8.83507	8.23162	9.02759	REACTOME_CELLULAR_RESPONSES_TO_EXTERNAL_STIMULI|REACTOME_CELLULAR_SENESCENCE|REACTOME_CYTOKINE_SIGNALING_IN_IMMUNE_SYSTEM|REACTOME_DISEASE|REACTOME_FC_EPSILON_RECEPTOR_FCERI_SIGNALING|REACTOME_FCERI_MEDIATED_MAPK_ACTIVATION|REACTOME_INFECTIOUS_DISEASE|REACTOME_INNATE_IMMUNE_SYSTEM|REACTOME_INTERLEUKIN_17_SIGNALING|REACTOME_JNK_C_JUN_KINASES_PHOSPHORYLATION_AND_ACTIVATION_MEDIATED_BY_ACTIVATED_HUM…
Q9CQ06	39S ribosomal protein L24, mitochondrial OS=Mus musculus OX=10090 GN=Mrpl24 PE=1 SV=1	Mrpl24	0.50253	0.0822627	0.193829		0	18.43	17	3	4	3	3	216	24.9	9.5	17.63	9.8636	10.6785	9.99317	11.1742	10.3638	10.3632	10.129	10.2914	10.1377	10.4926	REACTOME_MITOCHONDRIAL_TRANSLATION|REACTOME_TRANSLATION
A0A571BEC9	Isoform of O88492, Perilipin-4 OS=Mus musculus OX=10090 GN=Plin4 PE=1 SV=1	Plin4	0.502349	0.0351524	0.120625		0	99.448	53	21	29	1	21	1601	158.6	8.76	73.82	11.0805	12.0831	11.4838	12.1067	11.9407	11.9907	11.9229	12.216	11.5156	12.0588	NA
Q9D0M5	Dynein light chain 2, cytoplasmic OS=Mus musculus OX=10090 GN=Dynll2 PE=1 SV=1	Dynll2	0.502063	0.055586	0.155667		0	20.581	34	4	8	0	2	89	10.3	7.37	28.19	10.967	11.9103	11.1153	11.9668	10.7773	11.3587	11.3351	11.4462	10.9945	11.0177	REACTOME_ACTIVATION_OF_BH3_ONLY_PROTEINS|REACTOME_ADAPTIVE_IMMUNE_SYSTEM|REACTOME_AGGREPHAGY|REACTOME_ASPARAGINE_N_LINKED_GLYCOSYLATION|REACTOME_AUTOPHAGY|REACTOME_CELL_CYCLE|REACTOME_CELL_CYCLE_CHECKPOINTS|REACTOME_CELL_CYCLE_MITOTIC|REACTOME_CELLULAR_RESPONSES_TO_EXTERNAL_STIMULI|REACTOME_CILIUM_ASSEMBLY|REACTOME_COPI_INDEPENDENT_GOLGI_TO_ER_RETROGRADE_TRAFFIC|REACTOME_COPI_MEDIATED_ANTEROGRADE…
P48758	Carbonyl reductase [NADPH] 1 OS=Mus musculus OX=10090 GN=Cbr1 PE=1 SV=3	Cbr1	0.501855	0.00817696	0.0610762		0	82.96	60	14	30	3	12	277	30.6	8.31	103.38	12.1225	13.0044	12.3364	12.8959	12.5237	12.876	12.6273	12.9762	12.3864	12.7531	REACTOME_ARACHIDONIC_ACID_METABOLISM|REACTOME_FATTY_ACID_METABOLISM|REACTOME_METABOLISM_OF_LIPIDS|REACTOME_SYNTHESIS_OF_PROSTAGLANDINS_PG_AND_THROMBOXANES_TX_
Q792Z1	Trypsin 10 OS=Mus musculus OX=10090 GN=Try10 PE=1 SV=1	Try10	0.50145	0.266369	0.411882		0.009	2.612	4	1	1	1	1	246	26.2	5.83	2.65	7.33258	9.18172	8.27818	9.09103	7.87278	8.16639	8.49519	8.33984	8.2853	7.9923	REACTOME_ACTIVATION_OF_MATRIX_METALLOPROTEINASES|REACTOME_ALPHA_DEFENSINS|REACTOME_ANTIMICROBIAL_PEPTIDES|REACTOME_COBALAMIN_CBL_VITAMIN_B12_TRANSPORT_AND_METABOLISM|REACTOME_COLLAGEN_DEGRADATION|REACTOME_DEFENSINS|REACTOME_DEGRADATION_OF_THE_EXTRACELLULAR_MATRIX|REACTOME_EXTRACELLULAR_MATRIX_ORGANIZATION|REACTOME_INNATE_IMMUNE_SYSTEM|REACTOME_METABOLISM_OF_VITAMINS_AND_COFACTORS|REACTOME_METABOL…
Q9D1R1	Complex I assembly factor TMEM126B, mitochondrial OS=Mus musculus OX=10090 GN=Tmem126b PE=1 SV=1	Tmem126b	0.501321	0.0111996	0.0688642		0	12.405	10	2	2	2	2	230	25.4	9.51	9.2	7.27345	7.76049	7.32418	7.9482	7.62691	7.89871	7.62676	7.89036	7.39602	8.25617	REACTOME_COMPLEX_I_BIOGENESIS|REACTOME_RESPIRATORY_ELECTRON_TRANSPORT|REACTOME_RESPIRATORY_ELECTRON_TRANSPORT_ATP_SYNTHESIS_BY_CHEMIOSMOTIC_COUPLING_AND_HEAT_PRODUCTION_BY_UNCOUPLING_PROTEINS_|REACTOME_THE_CITRIC_ACID_TCA_CYCLE_AND_RESPIRATORY_ELECTRON_TRANSPORT
Q8R3G9	Tetraspanin-8 OS=Mus musculus OX=10090 GN=Tspan8 PE=1 SV=1	Tspan8	0.501006	0.031459	0.113742		0	15.595	9	2	4	2	2	235	25.6	5.16	12.72	9.14287	10.1913	9.38217	9.99435	9.80662	10.0005	9.88049	10.2692	9.55995	9.82185	NA
Q01063	cAMP-specific 3',5'-cyclic phosphodiesterase 4D OS=Mus musculus OX=10090 GN=Pde4d PE=1 SV=2	Pde4d	0.498803	0.0058098	0.0543947		0	11.505	4	3	3	0	3	747	84.5	4.91	8.57	8.25792	9.06545	8.35513	8.92563	8.73333	9.08325	8.69719	8.97258	8.52038	9.01105	REACTOME_DARPP_32_EVENTS|REACTOME_G_ALPHA_I_SIGNALLING_EVENTS|REACTOME_G_ALPHA_S_SIGNALLING_EVENTS|REACTOME_OPIOID_SIGNALLING|REACTOME_SIGNALING_BY_GPCR
E9PZQ0	Ryanodine receptor 1 OS=Mus musculus OX=10090 GN=Ryr1 PE=1 SV=1	Ryr1	0.49607	0.160485	0.293559		0	1574.03	50	207	744	0	206	5035	564.7	5.27	2609.8	16.0358	17.6337	16.7871	17.302	17.101	17.1236	17.4222	17.5088	16.9912	17.2496	REACTOME_CARDIAC_CONDUCTION|REACTOME_ION_CHANNEL_TRANSPORT|REACTOME_ION_HOMEOSTASIS|REACTOME_MUSCLE_CONTRACTION|REACTOME_STIMULI_SENSING_CHANNELS|REACTOME_TRANSPORT_OF_SMALL_MOLECULES
F6PZI9	Isoform of Q80VM7, Ankyrin repeat domain-containing protein 24 (Fragment) OS=Mus musculus OX=10090 GN=Ankrd24 PE=4 SV=1	Ankrd24	0.495313	0.0779942	0.18828		0.002	3.822	4	2	4	1	1	177	20.1	8.18	10.99	8.07095	8.57167	7.98455	9.0526	8.78736	8.7285	8.35533	8.48621	8.26275	9.09854	NA
P28650	Adenylosuccinate synthetase isozyme 1 OS=Mus musculus OX=10090 GN=Adss1 PE=1 SV=2	Adss1	0.495203	0.109082	0.228489		0	279.573	70	27	156	1	24	457	50.2	8.43	653.13	13.9732	15.3435	14.6589	15.2029	15.1047	15.062	15.2408	15.4215	14.7487	15.1725	NA
Q9QY80	Very-long-chain (3R)-3-hydroxyacyl-CoA dehydratase 1 OS=Mus musculus OX=10090 GN=Hacd1 PE=2 SV=1	Hacd1	0.494287	0.0295309	0.109927		0	15.454	4	2	14	0	2	281	32.3	9.51	50.93	11.4548	12.4976	11.7475	12.29	12.0578	12.2604	12.1703	12.4416	11.7821	12.1942	REACTOME_FATTY_ACID_METABOLISM|REACTOME_FATTY_ACYL_COA_BIOSYNTHESIS|REACTOME_METABOLISM_OF_LIPIDS|REACTOME_SYNTHESIS_OF_VERY_LONG_CHAIN_FATTY_ACYL_COAS
Q61584	Fragile X mental retardation syndrome-related protein 1 OS=Mus musculus OX=10090 GN=Fxr1 PE=1 SV=2	Fxr1	0.493624	0.0108868	0.0684361		0	146.16	46	25	54	0	21	677	76.2	6.98	199.62	12.7222	13.6443	13.0258	13.4706	13.0936	13.5311	13.1923	13.522	13.0233	13.3573	REACTOME_DISEASE|REACTOME_DISEASES_OF_SIGNAL_TRANSDUCTION_BY_GROWTH_FACTOR_RECEPTORS_AND_SECOND_MESSENGERS|REACTOME_ONCOGENIC_MAPK_SIGNALING|REACTOME_SIGNALING_BY_BRAF_AND_RAF_FUSIONS
Q62234-2	Isoform of Q62234, Isoform 2 of Myomesin-1 OS=Mus musculus OX=10090 GN=Myom1 PE=1 SV=2	Myom1	0.491943	0.00686468	0.0572929		0	847.173	80	118	607	0	1	1569	175.3	6.32	2120.77	6.11087	6.97718	6.39712	6.79423	6.73101	7.1149	6.79145	7.13135	6.58012	7.05263	NA
A2AA85	Isoform of Q6NXN1, SUZ domain-containing protein 1 (Fragment) OS=Mus musculus OX=10090 GN=Szrd1 PE=1 SV=1	Szrd1	0.491688	0.223579	0.365964		0	13.501	36	3	6	0	3	146	16.3	9.83	11.18	8.10546	7.68892	7.66329	8.02336	7.9528	8.01281	8.0346	8.9273	7.84186	9.40406	NA
P63028	Translationally-controlled tumor protein OS=Mus musculus OX=10090 GN=Tpt1 PE=1 SV=1	Tpt1	0.489944	0.0192678	0.0894282		0	88.478	60	9	45	3	9	172	19.5	4.86	158.21	13.3742	14.337	13.7133	13.9985	13.36	13.8744	13.6297	14.0859	13.6511	13.8823	NA
Q60597	2-oxoglutarate dehydrogenase, mitochondrial OS=Mus musculus OX=10090 GN=Ogdh PE=1 SV=3	Ogdh	0.488342	0.010955	0.0685009		0	508.623	57	52	281	1	1	1023	116.4	6.83	999.16	9.96287	10.7952	10.3475	10.8502	10.7791	11.0837	10.7313	10.9457	10.2098	10.7973	REACTOME_CITRIC_ACID_CYCLE_TCA_CYCLE_|REACTOME_GLYOXYLATE_METABOLISM_AND_GLYCINE_DEGRADATION|REACTOME_LYSINE_CATABOLISM|REACTOME_METABOLISM_OF_AMINO_ACIDS_AND_DERIVATIVES|REACTOME_PYRUVATE_METABOLISM_AND_CITRIC_ACID_TCA_CYCLE|REACTOME_THE_CITRIC_ACID_TCA_CYCLE_AND_RESPIRATORY_ELECTRON_TRANSPORT
Q9JKR6	Hypoxia up-regulated protein 1 OS=Mus musculus OX=10090 GN=Hyou1 PE=1 SV=1	Hyou1	0.487424	0.00670096	0.0569726		0	126.536	27	19	37	13	19	999	111.1	5.19	135.38	12.4675	13.1742	12.6393	13.0269	12.2724	12.9493	12.5706	13.0392	12.5654	12.7626	REACTOME_BINDING_AND_UPTAKE_OF_LIGANDS_BY_SCAVENGER_RECEPTORS|REACTOME_IRE1ALPHA_ACTIVATES_CHAPERONES|REACTOME_SCAVENGING_BY_CLASS_F_RECEPTORS|REACTOME_UNFOLDED_PROTEIN_RESPONSE_UPR_|REACTOME_VESICLE_MEDIATED_TRANSPORT
Q8BUE1	Sodium/hydrogen exchanger 4 OS=Mus musculus OX=10090 GN=Slc9a4 PE=2 SV=1	Slc9a4	0.487412	0.0552104	0.154909		0.04	1.303	1	1	1	1	1	797	90.9	8.91	2.17	7.18614	8.39944	7.5717	7.90616	7.52382	7.79341	7.90057	8.19356	7.40968	7.73639	REACTOME_GLYCOSAMINOGLYCAN_METABOLISM|REACTOME_HYALURONAN_METABOLISM|REACTOME_HYALURONAN_UPTAKE_AND_DEGRADATION|REACTOME_METABOLISM_OF_CARBOHYDRATES|REACTOME_SLC_MEDIATED_TRANSMEMBRANE_TRANSPORT|REACTOME_SODIUM_PROTON_EXCHANGERS|REACTOME_TRANSPORT_OF_INORGANIC_CATIONS_ANIONS_AND_AMINO_ACIDS_OLIGOPEPTIDES|REACTOME_TRANSPORT_OF_SMALL_MOLECULES
Q8BXV2	BRI3-binding protein OS=Mus musculus OX=10090 GN=Bri3bp PE=1 SV=1	Bri3bp	0.484509	0.188009	0.325126		0.006	2.691	4	1	1	1	1	253	28.2	9.52	2.44	8.52819	8.55581	7.9335	9.30102	9.24868	8.9486	8.12725	8.47545	8.2311	9.21039	NA
Q924C5	Alpha-protein kinase 3 OS=Mus musculus OX=10090 GN=Alpk3 PE=1 SV=2	Alpk3	0.484483	0.0148744	0.0789691		0	54.489	6	9	16	9	9	1680	180	6.16	44.03	10.5684	11.5145	10.9262	11.3668	10.9551	11.3274	11.0338	11.3144	10.8966	11.2795	NA
P68372	Tubulin beta-4B chain OS=Mus musculus OX=10090 GN=Tubb4b PE=1 SV=1	Tubb4b	0.483775	0.0263418	0.103013		0	229.255	71	25	160	2	2	445	49.8	4.89	624.68	14.4197	15.3768	14.7834	15.0913	14.5139	15.099	14.7353	15.18	14.7582	14.8823	REACTOME_ACTIVATION_OF_AMPK_DOWNSTREAM_OF_NMDARS|REACTOME_ACTIVATION_OF_NMDA_RECEPTORS_AND_POSTSYNAPTIC_EVENTS|REACTOME_ADAPTIVE_IMMUNE_SYSTEM|REACTOME_AGGREPHAGY|REACTOME_ANCHORING_OF_THE_BASAL_BODY_TO_THE_PLASMA_MEMBRANE|REACTOME_ASPARAGINE_N_LINKED_GLYCOSYLATION|REACTOME_ASSEMBLY_AND_CELL_SURFACE_PRESENTATION_OF_NMDA_RECEPTORS|REACTOME_AURKA_ACTIVATION_BY_TPX2|REACTOME_AUTOPHAGY|REACTOME_CARBO…
Q8CI70	Leucine-rich repeat-containing protein 20 OS=Mus musculus OX=10090 GN=Lrrc20 PE=1 SV=1	Lrrc20	0.483498	0.0319387	0.114683		0	18.073	24	4	7	4	4	184	20.8	5.66	25.01	10.0352	10.89	10.3458	10.8953	10.8759	10.8803	10.728	11.0387	10.4354	11.1336	NA
Q8CC21	Tetratricopeptide repeat protein 19, mitochondrial OS=Mus musculus OX=10090 GN=Ttc19 PE=1 SV=1	Ttc19	0.481021	0.0160988	0.0823619		0	20.26	14	5	7	0	5	365	41.2	6.21	25.69	9.93789	10.6708	10.1523	10.6843	10.6489	10.7399	10.5721	10.9138	10.2238	10.9312	NA
E9PZM4	Chromodomain-helicase-DNA-binding protein 2 OS=Mus musculus OX=10090 GN=Chd2 PE=1 SV=1	Chd2	0.477033	0.150175	0.279844		0.004	3.368	1	2	2	2	2	1827	210.7	8.06	2.56	8.39326	8.23301	8.2878	8.58051	8.71062	8.7811	8.64796	9.53729	8.49347	9.78635	REACTOME_ESR_MEDIATED_SIGNALING|REACTOME_ESTROGEN_DEPENDENT_GENE_EXPRESSION|REACTOME_SIGNALING_BY_NUCLEAR_RECEPTORS
Q9WV03	Protein FAM50A OS=Mus musculus OX=10090 GN=Fam50a PE=1 SV=1	Fam50a	0.476831	0.016263	0.0829659		0.001	9.104	8	2	2	1	2	339	40.2	6.83	6.32	9.20701	9.93032	9.29071	9.83566	9.79676	9.85937	9.64688	10.0257	9.38677	10.0612	NA
Q6P3A8	2-oxoisovalerate dehydrogenase subunit beta, mitochondrial OS=Mus musculus OX=10090 GN=Bckdhb PE=1 SV=2	Bckdhb	0.476608	0.0142064	0.0771013		0	12.02	10	2	5	1	2	390	42.9	6.7	17.39	8.5783	9.25015	8.82713	9.30984	9.31629	9.45277	9.12964	9.45234	8.73852	9.50782	REACTOME_BRANCHED_CHAIN_AMINO_ACID_CATABOLISM|REACTOME_GLYOXYLATE_METABOLISM_AND_GLYCINE_DEGRADATION|REACTOME_METABOLISM_OF_AMINO_ACIDS_AND_DERIVATIVES
O35099	Mitogen-activated protein kinase kinase kinase 5 OS=Mus musculus OX=10090 GN=Map3k5 PE=1 SV=3	Map3k5	0.476565	0.0679776	0.173512		0	11.907	2	4	4	0	4	1380	154.4	5.78	12.43	8.41646	9.11208	8.23195	9.27733	8.6774	8.65104	8.42006	8.56498	8.50805	9.03132	REACTOME_CELLULAR_RESPONSES_TO_EXTERNAL_STIMULI|REACTOME_CELLULAR_SENESCENCE|REACTOME_OXIDATIVE_STRESS_INDUCED_SENESCENCE
E9QM38	Isoform of P55012, Solute carrier family 12 member 2 OS=Mus musculus OX=10090 GN=Slc12a2 PE=1 SV=1	Slc12a2	0.475804	0.00590065	0.0544339		0	19.171	4	4	4	0	4	1206	130.6	6.52	15.11	8.82509	9.486	8.96104	9.48572	9.32734	9.53364	9.15462	9.49246	8.9801	9.62938	REACTOME_CATION_COUPLED_CHLORIDE_COTRANSPORTERS|REACTOME_DISEASE|REACTOME_DISORDERS_OF_TRANSMEMBRANE_TRANSPORTERS|REACTOME_SLC_MEDIATED_TRANSMEMBRANE_TRANSPORT|REACTOME_SLC_TRANSPORTER_DISORDERS|REACTOME_TRANSPORT_OF_INORGANIC_CATIONS_ANIONS_AND_AMINO_ACIDS_OLIGOPEPTIDES|REACTOME_TRANSPORT_OF_SMALL_MOLECULES
P70445	Eukaryotic translation initiation factor 4E-binding protein 2 OS=Mus musculus OX=10090 GN=Eif4ebp2 PE=1 SV=1	Eif4ebp2	0.475537	0.133373	0.259244		0.001	9.88	23	2	3	2	2	120	12.9	6.52	7.41	7.12395	6.75754	6.96348	7.45567	7.23016	7.5347	6.95916	7.78161	6.95249	8.0774	REACTOME_ACTIVATION_OF_THE_MRNA_UPON_BINDING_OF_THE_CAP_BINDING_COMPLEX_AND_EIFS_AND_SUBSEQUENT_BINDING_TO_43S|REACTOME_EUKARYOTIC_TRANSLATION_INITIATION|REACTOME_MTOR_SIGNALLING|REACTOME_MTORC1_MEDIATED_SIGNALLING|REACTOME_TRANSLATION
Q9Z1Z2	Serine-threonine kinase receptor-associated protein OS=Mus musculus OX=10090 GN=Strap PE=1 SV=2	Strap	0.473803	0.0162087	0.0827808		0	77.05	39	11	26	11	11	350	38.4	5.12	85.5	12.0239	12.958	12.3734	12.7017	12.3131	12.7564	12.4174	12.8089	12.3252	12.5972	REACTOME_DOWNREGULATION_OF_TGF_BETA_RECEPTOR_SIGNALING|REACTOME_SIGNALING_BY_TGF_BETA_RECEPTOR_COMPLEX|REACTOME_SIGNALING_BY_TGFB_FAMILY_MEMBERS|REACTOME_TGF_BETA_RECEPTOR_SIGNALING_ACTIVATES_SMADS
P47757	F-actin-capping protein subunit beta OS=Mus musculus OX=10090 GN=Capzb PE=1 SV=3	Capzb	0.473673	0.0204383	0.0913149		0	107.492	58	17	63	2	2	277	31.3	5.74	205.8	10.1688	11.014	10.3777	10.9951	10.8063	10.9437	10.7575	11.0071	10.4701	10.989	REACTOME_ADAPTIVE_IMMUNE_SYSTEM|REACTOME_ASPARAGINE_N_LINKED_GLYCOSYLATION|REACTOME_CELLULAR_RESPONSES_TO_EXTERNAL_STIMULI|REACTOME_COPI_INDEPENDENT_GOLGI_TO_ER_RETROGRADE_TRAFFIC|REACTOME_COPI_MEDIATED_ANTEROGRADE_TRANSPORT|REACTOME_ER_TO_GOLGI_ANTEROGRADE_TRANSPORT|REACTOME_FACTORS_INVOLVED_IN_MEGAKARYOCYTE_DEVELOPMENT_AND_PLATELET_PRODUCTION|REACTOME_GOLGI_TO_ER_RETROGRADE_TRANSPORT|REACTOME_H…
P54823	Probable ATP-dependent RNA helicase DDX6 OS=Mus musculus OX=10090 GN=Ddx6 PE=1 SV=1	Ddx6	0.471546	0.00511194	0.0511107		0	63.385	33	13	26	12	12	483	54.2	8.66	84.63	11.4278	12.1962	11.6316	12.0505	11.5494	12.0433	11.6658	12.0955	11.6451	11.8919	REACTOME_DEADENYLATION_DEPENDENT_MRNA_DECAY|REACTOME_METABOLISM_OF_RNA|REACTOME_MRNA_DECAY_BY_5_TO_3_EXORIBONUCLEASE
A2AFR3	FERM and PDZ domain-containing protein 4 OS=Mus musculus OX=10090 GN=Frmpd4 PE=1 SV=1	Frmpd4	0.471362	0.0288989	0.108559		0.028	1.502	1	1	1	0	1	1320	144.9	5.25	2.42	7.68163	8.29436	7.77896	8.13017	8.05298	8.13082	8.43082	8.82347	8.03001	8.95239	REACTOME_INNATE_IMMUNE_SYSTEM|REACTOME_NEUTROPHIL_DEGRANULATION
P62259	14-3-3 protein epsilon OS=Mus musculus OX=10090 GN=Ywhae PE=1 SV=1	Ywhae	0.471041	0.0234246	0.0983481		0	170.837	69	21	131	5	18	255	29.2	4.74	425.61	14.0401	15.0092	14.3827	14.8139	14.3304	14.7475	14.5625	14.916	14.4152	14.5994	REACTOME_ACTIVATION_OF_BAD_AND_TRANSLOCATION_TO_MITOCHONDRIA_|REACTOME_ACTIVATION_OF_BH3_ONLY_PROTEINS|REACTOME_ANCHORING_OF_THE_BASAL_BODY_TO_THE_PLASMA_MEMBRANE|REACTOME_AURKA_ACTIVATION_BY_TPX2|REACTOME_CELL_CYCLE|REACTOME_CELL_CYCLE_CHECKPOINTS|REACTOME_CELL_CYCLE_MITOTIC|REACTOME_CELL_DEATH_SIGNALLING_VIA_NRAGE_NRIF_AND_NADE|REACTOME_CELLULAR_RESPONSE_TO_HEAT_STRESS|REACTOME_CELLULAR_RESPONS…
Q9CZ30	Obg-like ATPase 1 OS=Mus musculus OX=10090 GN=Ola1 PE=1 SV=1	Ola1	0.470491	0.0207453	0.0922378		0	86.821	39	16	41	6	16	396	44.7	7.81	134.69	12.9492	13.9166	13.3197	13.7447	13.4029	13.714	13.591	13.8634	13.3305	13.7071	REACTOME_HEMOSTASIS|REACTOME_PLATELET_ACTIVATION_SIGNALING_AND_AGGREGATION|REACTOME_RESPONSE_TO_ELEVATED_PLATELET_CYTOSOLIC_CA2_
Q3UHT7	Isoform of Q6PH08, ERC protein 2 OS=Mus musculus OX=10090 GN=Erc2 PE=1 SV=1	Erc2	0.469426	0.0674331	0.173169		0.001	4.31	4	3	7	0	1	977	113	7.09	12.01	8.2054	8.92088	8.40017	8.74246	8.88785	8.7829	8.83536	9.2162	8.34139	9.35484	NA
Q9DC60	UbiA prenyltransferase domain-containing protein 1 OS=Mus musculus OX=10090 GN=Ubiad1 PE=2 SV=1	Ubiad1	0.468815	0.0236867	0.0989149		0.015	2.222	4	1	1	1	1	336	36.7	8.22	2.05	6.88381	7.55034	6.91339	7.69403	7.4733	7.57025	7.10736	7.32889	6.97219	7.55061	REACTOME_METABOLISM_OF_FAT_SOLUBLE_VITAMINS|REACTOME_METABOLISM_OF_VITAMINS_AND_COFACTORS
P58281-2	Isoform of P58281, Isoform 2 of Dynamin-like 120 kDa protein, mitochondrial OS=Mus musculus OX=10090 GN=Opa1 PE=1 SV=1	Opa1	0.468456	0.0241124	0.0998984		0	159.224	31	25	47	0	25	997	115.5	7.55	163.92	12.4745	13.4131	12.8549	13.3346	13.1039	13.2856	13.1875	13.4387	12.7962	13.2874	REACTOME_PROGRAMMED_CELL_DEATH
Q8BSH9	Isoform of P28656, Nucleosome assembly protein 1-like 1 OS=Mus musculus OX=10090 GN=Nap1l1 PE=1 SV=1	Nap1l1	0.46798	0.0205983	0.0918178		0	30.864	16	5	13	0	4	383	44.6	4.56	44.38	11.1324	11.3602	10.9627	11.2774	10.4586	11.292	10.5203	11.2288	10.7841	11.0397	NA
Q8VEE1	LIM and cysteine-rich domains protein 1 OS=Mus musculus OX=10090 GN=Lmcd1 PE=1 SV=1	Lmcd1	0.467742	0.00821898	0.0611103		0	120.07	60	19	53	19	19	365	41	7.93	150.92	12.3944	13.2311	12.7037	13.0868	12.7931	13.2499	12.9459	13.3201	12.6032	12.8911	REACTOME_SURFACTANT_METABOLISM
E9QQ25	Isoform of Q62407, Striated muscle-specific serine/threonine-protein kinase OS=Mus musculus OX=10090 GN=Speg PE=1 SV=1	Speg	0.467208	0.0455361	0.138697		0	245.088	15	40	75	0	40	3262	354.1	8.18	268.79	13.1513	14.2377	13.5764	14.0399	13.7624	13.922	13.9263	14.1893	13.7218	14.0853	NA
Q9D7C9	Nicotinamide riboside kinase 2 OS=Mus musculus OX=10090 GN=Nmrk2 PE=1 SV=1	Nmrk2	0.467064	0.123377	0.246796		0.001	5.262	8	1	2	1	1	195	22.4	6.29	8.09	6.30571	6.30079	5.56369	6.93717	5.9887	6.22074	5.71276	5.95474	5.73978	6.23252	REACTOME_METABOLISM_OF_VITAMINS_AND_COFACTORS|REACTOME_METABOLISM_OF_WATER_SOLUBLE_VITAMINS_AND_COFACTORS|REACTOME_NICOTINATE_METABOLISM
Q8BGK2	Inactive ADP-ribosyltransferase ARH2 OS=Mus musculus OX=10090 GN=Adprhl1 PE=1 SV=1	Adprhl1	0.465329	0.00778455	0.0601432		0	60.7	33	11	15	1	1	353	39.9	5.91	57.22	7.95826	8.39944	8.07306	8.50714	7.9385	8.74522	8.03141	8.4487	7.92757	8.15494	NA
Q9ET78	Junctophilin-2 OS=Mus musculus OX=10090 GN=Jph2 PE=1 SV=2	Jph2	0.462894	0.092088	0.20697		0	144.878	40	22	66	19	21	696	74.6	8.16	208.72	13.4511	14.6722	13.9187	14.5059	14.2305	14.3187	14.4264	14.5322	14.0816	14.3936	NA
Q3UGR5	Haloacid dehalogenase-like hydrolase domain-containing protein 2 OS=Mus musculus OX=10090 GN=Hdhd2 PE=1 SV=2	Hdhd2	0.46105	0.0183427	0.0874795		0	63.2	42	8	26	4	8	259	28.7	6.05	88.14	12.0428	12.9814	12.4646	12.8226	12.4984	12.8682	12.7047	13.0292	12.4441	12.7584	REACTOME_METABOLISM_OF_NUCLEOTIDES|REACTOME_NUCLEOBASE_BIOSYNTHESIS|REACTOME_PURINE_RIBONUCLEOSIDE_MONOPHOSPHATE_BIOSYNTHESIS
Q80UN9	tRNA dimethylallyltransferase OS=Mus musculus OX=10090 GN=Trit1 PE=2 SV=2	Trit1	0.460449	0.0390036	0.127765		0.001	9.01	6	2	2	1	2	467	52.4	8.21	5.23	7.20913	7.79927	7.34013	8.00201	7.57445	7.624	7.40891	7.56703	7.38592	8.22847	REACTOME_METABOLISM_OF_RNA|REACTOME_TRNA_MODIFICATION_IN_THE_MITOCHONDRION|REACTOME_TRNA_MODIFICATION_IN_THE_NUCLEUS_AND_CYTOSOL|REACTOME_TRNA_PROCESSING
Q9CRA2	Isoform of Q8CI51, PDZ and LIM domain protein 5 OS=Mus musculus OX=10090 GN=Pdlim5 PE=1 SV=1	Pdlim5	0.459103	0.160111	0.293227		0	132.773	63	13	148	2	5	214	23.8	9.92	536.01	13.939	15.3588	14.6803	15.312	15.1622	15.0862	15.2423	15.3615	14.8942	15.0952	REACTOME_NEUREXINS_AND_NEUROLIGINS|REACTOME_NEURONAL_SYSTEM|REACTOME_PROTEIN_PROTEIN_INTERACTIONS_AT_SYNAPSES
Q9D1G3	Protein-cysteine N-palmitoyltransferase HHAT-like protein OS=Mus musculus OX=10090 GN=Hhatl PE=1 SV=2	Hhatl	0.45783	0.0773363	0.187134		0	103.278	26	15	51	12	15	503	56.4	6.65	185.2	12.8453	13.9918	13.2839	13.8679	13.7679	13.845	13.9253	14.0642	13.5897	13.9324	NA
Q6NSQ9	Glucose-6-phosphatase 3 OS=Mus musculus OX=10090 GN=G6pc3 PE=1 SV=1	G6pc3	0.457502	0.00536498	0.052313		0.004	3.439	2	1	1	1	1	346	38.8	8.13	2.77	7.30306	7.96965	7.47468	7.74764	7.5942	8.2376	7.68202	8.08139	7.58778	7.89296	REACTOME_DISEASE|REACTOME_DISEASES_OF_CARBOHYDRATE_METABOLISM|REACTOME_DISEASES_OF_METABOLISM|REACTOME_GLUCONEOGENESIS|REACTOME_GLUCOSE_METABOLISM|REACTOME_GLYCOGEN_STORAGE_DISEASES|REACTOME_METABOLISM_OF_CARBOHYDRATES
P58252	Elongation factor 2 OS=Mus musculus OX=10090 GN=Eef2 PE=1 SV=2	Eef2	0.45568	0.0364465	0.122574		0	314.06	51	41	198	40	40	858	95.3	6.83	646.19	15.1423	16.1816	15.5568	15.8662	15.4599	15.8122	15.6408	15.9816	15.5269	15.7635	REACTOME_DISEASE|REACTOME_EUKARYOTIC_TRANSLATION_ELONGATION|REACTOME_GAMMA_CARBOXYLATION_HYPUSINE_FORMATION_AND_ARYLSULFATASE_ACTIVATION|REACTOME_INFECTIOUS_DISEASE|REACTOME_INNATE_IMMUNE_SYSTEM|REACTOME_METABOLISM_OF_RNA|REACTOME_MRNA_SPLICING|REACTOME_MRNA_SPLICING_MINOR_PATHWAY|REACTOME_NEUTROPHIL_DEGRANULATION|REACTOME_POST_TRANSLATIONAL_PROTEIN_MODIFICATION|REACTOME_PROCESSING_OF_CAPPED_INTR…
E9QMW4	Uncharacterized protein C16orf96 homolog OS=Mus musculus OX=10090 PE=2 SV=1	NA	0.455483	0.117674	0.240019		0.001	4.323	1	2	3	0	1	1145	127.6	6.57	8.71	7.65496	7.8525	7.45935	8.37189	8.43227	8.25421	7.8002	8.09984	7.3776	8.42335	NA
Q3TVK3	Isoform of Q9Z2W0, Aspartyl aminopeptidase OS=Mus musculus OX=10090 GN=Dnpep PE=1 SV=1	Dnpep	0.454975	0.0125476	0.0729043		0	68.448	30	11	26	0	11	475	52.4	7.25	86.71	11.8829	12.695	12.1048	12.5013	12.011	12.5511	12.247	12.5844	12.1911	12.3798	NA
Q99KL7	Ras-related protein Rab-28 OS=Mus musculus OX=10090 GN=Rab28 PE=1 SV=1	Rab28	0.453914	0.0118352	0.070911		0.012	2.444	5	1	1	0	1	221	24.7	5.67	2.1	6.74233	6.9235	6.65717	7.29444	7.00367	7.22642	6.77657	7.41861	6.77885	7.3652	NA
P48774	Glutathione S-transferase Mu 5 OS=Mus musculus OX=10090 GN=Gstm5 PE=1 SV=1	Gstm5	0.453692	0.0471261	0.141139		0	85.304	71	15	31	0	13	224	26.6	7.21	97.5	11.9931	13.0822	12.4714	12.7878	12.6786	12.9214	12.8444	13.1089	12.647	13.0028	REACTOME_BIOLOGICAL_OXIDATIONS|REACTOME_BIOSYNTHESIS_OF_SPECIALIZED_PRORESOLVING_MEDIATORS_SPMS_|REACTOME_GLUTATHIONE_CONJUGATION|REACTOME_METABOLISM_OF_LIPIDS|REACTOME_PHASE_II_CONJUGATION_OF_COMPOUNDS
A2AAJ9	Obscurin OS=Mus musculus OX=10090 GN=Obscn PE=1 SV=3	Obscn	0.453557	0.136442	0.26288		0	1476.45	42	236	619	3	25	8886	966	5.9	2259.51	16.0662	17.4818	16.7657	17.1329	16.8972	17.0673	17.22	17.3979	16.9135	17.0505	REACTOME_CELL_DEATH_SIGNALLING_VIA_NRAGE_NRIF_AND_NADE|REACTOME_DEATH_RECEPTOR_SIGNALLING|REACTOME_G_ALPHA_12_13_SIGNALLING_EVENTS|REACTOME_HEMOSTASIS|REACTOME_MUSCLE_CONTRACTION|REACTOME_NEDDYLATION|REACTOME_NRAGE_SIGNALS_DEATH_THROUGH_JNK|REACTOME_P75_NTR_RECEPTOR_MEDIATED_SIGNALLING|REACTOME_PLATELET_ACTIVATION_SIGNALING_AND_AGGREGATION|REACTOME_POST_TRANSLATIONAL_PROTEIN_MODIFICATION|REACTOME…
Q9D273	Corrinoid adenosyltransferase OS=Mus musculus OX=10090 GN=Mmab PE=1 SV=1	Mmab	0.452781	0.0138112	0.076058		0	20.066	14	3	6	0	3	237	26.3	9.2	22.21	9.68819	10.419	9.84203	10.3536	10.2367	10.3324	10.1667	10.5176	9.83535	10.4103	REACTOME_COBALAMIN_CBL_VITAMIN_B12_TRANSPORT_AND_METABOLISM|REACTOME_DEFECTS_IN_COBALAMIN_B12_METABOLISM|REACTOME_DEFECTS_IN_VITAMIN_AND_COFACTOR_METABOLISM|REACTOME_DISEASE|REACTOME_DISEASES_OF_METABOLISM|REACTOME_METABOLISM_OF_VITAMINS_AND_COFACTORS|REACTOME_METABOLISM_OF_WATER_SOLUBLE_VITAMINS_AND_COFACTORS
A0A0R4J174	Isoform of Q9QZH6, Evolutionarily conserved signaling intermediate in Toll pathway, mitochondrial OS=Mus musculus OX=10090 GN=Ecsit PE=1 SV=1	Ecsit	0.450601	0.0198296	0.0905069		0	30.624	15	6	15	1	6	435	49.7	6.6	41.44	9.93459	10.8193	10.1412	10.6252	10.3766	10.5939	10.6127	10.8558	10.225	10.6488	REACTOME_COMPLEX_I_BIOGENESIS|REACTOME_INNATE_IMMUNE_SYSTEM|REACTOME_RESPIRATORY_ELECTRON_TRANSPORT|REACTOME_RESPIRATORY_ELECTRON_TRANSPORT_ATP_SYNTHESIS_BY_CHEMIOSMOTIC_COUPLING_AND_HEAT_PRODUCTION_BY_UNCOUPLING_PROTEINS_|REACTOME_THE_CITRIC_ACID_TCA_CYCLE_AND_RESPIRATORY_ELECTRON_TRANSPORT|REACTOME_TOLL_LIKE_RECEPTOR_10_TLR10_CASCADE|REACTOME_TOLL_LIKE_RECEPTOR_4_TLR4_CASCADE|REACTOME_TOLL_LIKE…
A0A571BG24	Isoform of Q3UH68, LIM and calponin homology domains-containing protein 1 OS=Mus musculus OX=10090 GN=Limch1 PE=1 SV=1	Limch1	0.449724	0.0257718	0.102342		0	102.652	17	22	30	7	22	1511	168.4	5.41	84.28	11.6896	12.6129	12.0062	12.5429	12.1759	12.4595	12.2942	12.5592	12.1708	12.4109	NA
Q8R4S0	Protein phosphatase 1 regulatory subunit 14C OS=Mus musculus OX=10090 GN=Ppp1r14c PE=1 SV=1	Ppp1r14c	0.44867	0.04011	0.130011		0.001	5.278	10	1	1	1	1	164	17.7	5.27	3.8	7.59584	8.13948	7.78609	8.30951	8.32602	8.33858	8.03652	8.29562	7.47698	8.3816	NA
A0A1B0GS13	Isoform of Q07813, Apoptosis regulator BAX (Fragment) OS=Mus musculus OX=10090 GN=Bax PE=1 SV=1	Bax	0.448503	0.0351278	0.12061		0	10.023	23	2	2	0	2	114	12.6	4.94	6.2	7.74543	7.79365	7.5088	7.94883	7.20611	8.05291	6.99699	7.66427	7.42141	7.66158	REACTOME_APOPTOTIC_FACTOR_MEDIATED_RESPONSE|REACTOME_INTRINSIC_PATHWAY_FOR_APOPTOSIS|REACTOME_PROGRAMMED_CELL_DEATH|REACTOME_RELEASE_OF_APOPTOTIC_FACTORS_FROM_THE_MITOCHONDRIA|REACTOME_RNA_POLYMERASE_II_TRANSCRIPTION|REACTOME_SIGNALING_BY_NTRK3_TRKC_|REACTOME_SIGNALING_BY_NTRKS|REACTOME_SIGNALING_BY_RECEPTOR_TYROSINE_KINASES|REACTOME_TP53_REGULATES_TRANSCRIPTION_OF_CELL_CYCLE_GENES|REACTOME_TP53_…
Q9JK37	Myozenin-1 OS=Mus musculus OX=10090 GN=Myoz1 PE=1 SV=1	Myoz1	0.448332	0.188827	0.325966		0	156.137	75	18	182	18	18	296	31.4	8.65	570.6	14.233	15.6927	14.9609	15.5372	15.4458	15.2976	15.5788	15.5769	15.1577	15.5135	NA
P42232	Signal transducer and activator of transcription 5B OS=Mus musculus OX=10090 GN=Stat5b PE=1 SV=1	Stat5b	0.44791	0.0348268	0.120055		0	96.898	27	15	23	5	5	786	89.9	6.05	70.89	11.6526	12.5993	11.9501	12.4408	12.3002	12.415	12.276	12.5111	11.9828	12.435	REACTOME_CYTOKINE_SIGNALING_IN_IMMUNE_SYSTEM|REACTOME_DISEASE|REACTOME_DISEASES_OF_SIGNAL_TRANSDUCTION_BY_GROWTH_FACTOR_RECEPTORS_AND_SECOND_MESSENGERS|REACTOME_DOWNSTREAM_SIGNAL_TRANSDUCTION|REACTOME_ERYTHROPOIETIN_ACTIVATES_STAT5|REACTOME_FGFR1_MUTANT_RECEPTOR_ACTIVATION|REACTOME_FLT3_SIGNALING|REACTOME_GROWTH_HORMONE_RECEPTOR_SIGNALING|REACTOME_INTERLEUKIN_15_SIGNALING|REACTOME_INTERLEUKIN_2_F…
E9QAD3	Isoform of Q02395, Metal-response element-binding transcription factor 2 OS=Mus musculus OX=10090 GN=Mtf2 PE=1 SV=1	Mtf2	0.447737	0.170484	0.304807		0.027	1.545	2	1	2	0	1	536	60.5	8.21	1.7	6.58217	7.96965	6.95544	7.55238	7.18656	7.11296	7.18532	7.12404	6.96237	7.35151	REACTOME_EPIGENETIC_REGULATION_OF_GENE_EXPRESSION|REACTOME_PRC2_METHYLATES_HISTONES_AND_DNA
O70250	Phosphoglycerate mutase 2 OS=Mus musculus OX=10090 GN=Pgam2 PE=1 SV=3	Pgam2	0.447166	0.132949	0.259061		0	252.561	85	26	313	20	20	253	28.8	8.5	1064.16	15.5731	16.927	16.2427	16.7021	16.3989	16.4519	16.688	16.7904	16.3703	16.6374	REACTOME_GLUCONEOGENESIS|REACTOME_GLUCOSE_METABOLISM|REACTOME_GLYCOLYSIS|REACTOME_INNATE_IMMUNE_SYSTEM|REACTOME_METABOLISM_OF_CARBOHYDRATES|REACTOME_NEUTROPHIL_DEGRANULATION
O70622-2	Isoform of O70622, Isoform 2 of Reticulon-2 OS=Mus musculus OX=10090 GN=Rtn2 PE=1 SV=1	Rtn2	0.446011	0.0878602	0.201073		0	83.898	54	10	56	2	10	204	22.2	9.44	244.58	12.6358	13.8343	13.1779	13.6248	13.3961	13.5033	13.6599	13.7975	13.2709	13.6109	NA
Q6P5D8	Structural maintenance of chromosomes flexible hinge domain-containing protein 1 OS=Mus musculus OX=10090 GN=Smchd1 PE=1 SV=2	Smchd1	0.445917	0.0224363	0.096419		0	23.294	4	8	11	7	8	2007	225.5	7.24	28.57	10.3983	10.9566	10.4593	11.3349	10.421	10.6762	10.4132	10.6175	10.6765	11.0126	NA
Q9QXS1	Plectin OS=Mus musculus OX=10090 GN=Plec PE=1 SV=3	Plec	0.445574	0.138559	0.265051		0	1830.5	61	297	930	0	294	4691	533.9	5.96	3263.03	16.7499	18.1122	17.3953	17.8439	17.4266	17.6923	17.7994	17.9699	17.5609	17.5416	REACTOME_APOPTOTIC_CLEAVAGE_OF_CELL_ADHESION_PROTEINS|REACTOME_APOPTOTIC_CLEAVAGE_OF_CELLULAR_PROTEINS|REACTOME_APOPTOTIC_EXECUTION_PHASE|REACTOME_ASSEMBLY_OF_COLLAGEN_FIBRILS_AND_OTHER_MULTIMERIC_STRUCTURES|REACTOME_CASPASE_MEDIATED_CLEAVAGE_OF_CYTOSKELETAL_PROTEINS|REACTOME_CELL_CELL_COMMUNICATION|REACTOME_CELL_JUNCTION_ORGANIZATION|REACTOME_COLLAGEN_FORMATION|REACTOME_DEVELOPMENTAL_BIOLOGY|REA…
P0DP27	Calmodulin-2 OS=Mus musculus OX=10090 GN=Calm2 PE=1 SV=1	Calm2	0.44428	0.25967	0.405388		0	62.005	87	11	43	2	10	149	16.8	4.22	125.22	12.5677	14.1717	13.4084	14.0622	13.7156	13.4274	14.1383	13.9774	13.3956	13.8083	REACTOME_ACTIVATION_OF_AMPK_DOWNSTREAM_OF_NMDARS|REACTOME_ACTIVATION_OF_KAINATE_RECEPTORS_UPON_GLUTAMATE_BINDING|REACTOME_ACTIVATION_OF_NMDA_RECEPTORS_AND_POSTSYNAPTIC_EVENTS|REACTOME_ACTIVATION_OF_RAC1_DOWNSTREAM_OF_NMDARS|REACTOME_ADAPTIVE_IMMUNE_SYSTEM|REACTOME_ANTI_INFLAMMATORY_RESPONSE_FAVOURING_LEISHMANIA_PARASITE_INFECTION|REACTOME_ANTIGEN_ACTIVATES_B_CELL_RECEPTOR_BCR_LEADING_TO_GENERATIO…
Q9D6L8	Peptidyl-prolyl cis-trans isomerase-like 3 OS=Mus musculus OX=10090 GN=Ppil3 PE=1 SV=1	Ppil3	0.443005	0.0129266	0.0738409		0.004	3.496	7	1	2	1	1	161	18.1	6.79	5.95	9.01914	9.54081	8.93389	9.65088	8.94568	9.45409	9.23731	9.32616	8.98441	9.36353	REACTOME_METABOLISM_OF_RNA|REACTOME_MRNA_SPLICING|REACTOME_PROCESSING_OF_CAPPED_INTRON_CONTAINING_PRE_MRNA
Q9DAV9	Trimeric intracellular cation channel type B OS=Mus musculus OX=10090 GN=Tmem38b PE=1 SV=1	Tmem38b	0.442341	0.00980452	0.0656115		0.001	8.397	9	2	3	0	2	292	32.6	9.11	11.09	9.02629	9.79361	9.33551	9.52658	9.19099	9.67927	9.35859	9.7886	9.16243	9.49748	NA
P56375	Acylphosphatase-2 OS=Mus musculus OX=10090 GN=Acyp2 PE=1 SV=2	Acyp2	0.441912	0.0950256	0.210677		0	40.923	69	9	24	9	9	106	11.9	9.26	74.32	12.0902	13.1942	12.5011	13.1559	12.9247	12.9142	13.011	13.0897	12.4321	12.8147	NA
O70571	[Pyruvate dehydrogenase (acetyl-transferring)] kinase isozyme 4, mitochondrial OS=Mus musculus OX=10090 GN=Pdk4 PE=1 SV=1	Pdk4	0.441596	0.0199732	0.0907321		0	14.18	10	3	3	2	3	412	46.6	7.08	13.12	8.75937	9.12194	9.13008	9.74414	9.17406	9.26987	9.0003	9.35574	8.326	9.1061	REACTOME_PYRUVATE_METABOLISM|REACTOME_PYRUVATE_METABOLISM_AND_CITRIC_ACID_TCA_CYCLE|REACTOME_REGULATION_OF_PYRUVATE_DEHYDROGENASE_PDH_COMPLEX|REACTOME_SIGNALING_BY_NUCLEAR_RECEPTORS|REACTOME_SIGNALING_BY_RETINOIC_ACID|REACTOME_THE_CITRIC_ACID_TCA_CYCLE_AND_RESPIRATORY_ELECTRON_TRANSPORT
Q8BU30	Isoleucine--tRNA ligase, cytoplasmic OS=Mus musculus OX=10090 GN=Iars1 PE=1 SV=2	Iars1	0.439324	0.0142157	0.0771013		0	142.578	24	27	49	23	27	1262	144.2	6.55	168.56	12.8568	13.7015	13.2049	13.5305	13.0931	13.5051	13.2662	13.6467	13.1663	13.4001	NA
P52479	Ubiquitin carboxyl-terminal hydrolase 10 OS=Mus musculus OX=10090 GN=Usp10 PE=1 SV=3	Usp10	0.438239	0.0075949	0.0599176		0	30.544	10	7	8	0	7	792	87	5.17	31.57	10.2275	10.9892	10.4061	10.8596	10.5364	10.843	10.5841	10.8439	10.3954	10.8049	REACTOME_DEUBIQUITINATION|REACTOME_DNA_DAMAGE_BYPASS|REACTOME_DNA_REPAIR|REACTOME_POST_TRANSLATIONAL_PROTEIN_MODIFICATION|REACTOME_TERMINATION_OF_TRANSLESION_DNA_SYNTHESIS|REACTOME_TRANSLESION_SYNTHESIS_BY_Y_FAMILY_DNA_POLYMERASES_BYPASSES_LESIONS_ON_DNA_TEMPLATE|REACTOME_UB_SPECIFIC_PROCESSING_PROTEASES
E9Q827	Isoform of P56212, cAMP-regulated phosphoprotein 19 OS=Mus musculus OX=10090 GN=Arpp19 PE=1 SV=1	Arpp19	0.438054	0.00995731	0.0659616		0	22.038	29	4	10	0	3	145	16.1	9.76	30.02	10.7358	11.5268	10.8685	11.3378	10.9634	11.3176	11.154	11.4035	11.0298	11.356	REACTOME_CELL_CYCLE|REACTOME_CELL_CYCLE_MITOTIC|REACTOME_M_PHASE|REACTOME_MASTL_FACILITATES_MITOTIC_PROGRESSION|REACTOME_MITOTIC_PROPHASE
P09528	Ferritin heavy chain OS=Mus musculus OX=10090 GN=Fth1 PE=1 SV=2	Fth1	0.437526	0.0265644	0.103289		0	126.968	69	13	65	7	13	182	21.1	5.88	247.83	13.4802	14.1756	13.7376	14.1693	13.4865	14.1001	13.7822	14.2669	13.8767	13.839	REACTOME_BINDING_AND_UPTAKE_OF_LIGANDS_BY_SCAVENGER_RECEPTORS|REACTOME_GOLGI_ASSOCIATED_VESICLE_BIOGENESIS|REACTOME_INNATE_IMMUNE_SYSTEM|REACTOME_IRON_UPTAKE_AND_TRANSPORT|REACTOME_MEMBRANE_TRAFFICKING|REACTOME_NEUTROPHIL_DEGRANULATION|REACTOME_SCAVENGING_BY_CLASS_A_RECEPTORS|REACTOME_TRANS_GOLGI_NETWORK_VESICLE_BUDDING|REACTOME_TRANSPORT_OF_SMALL_MOLECULES|REACTOME_VESICLE_MEDIATED_TRANSPORT
A0A1B0GSG5	Isoform of Q91VI7, Ribonuclease inhibitor OS=Mus musculus OX=10090 GN=Rnh1 PE=1 SV=1	Rnh1	0.437518	0.00596682	0.0544339		0	84.264	27	11	35	0	11	492	53.9	5.01	112.83	12.3932	13.1138	12.6091	12.9369	12.4654	12.9444	12.592	13.0161	12.6112	12.8471	NA
Q61765	Keratin, type I cuticular Ha1 OS=Mus musculus OX=10090 GN=Krt31 PE=1 SV=2	Krt31	0.437152	0.470214	0.605435		0	29.529	18	7	13	1	1	416	47.1	4.89	39.34	8.70244	8.13574	7.95494	9.75585	8.06573	8.33571	8.63698	7.73141	7.72838	9.31551	REACTOME_DEVELOPMENTAL_BIOLOGY|REACTOME_FORMATION_OF_THE_CORNIFIED_ENVELOPE|REACTOME_KERATINIZATION
A0A0A0MQA5	Isoform of P68368, Tubulin alpha chain (Fragment) OS=Mus musculus OX=10090 GN=Tuba4a PE=1 SV=1	Tuba4a	0.435606	0.0379473	0.125549		0	213.494	57	25	147	0	7	477	52.9	5.19	503.52	14.6366	15.5024	14.9166	15.2604	14.5598	15.1558	14.8042	15.1691	14.91	14.9176	REACTOME_ACTIVATION_OF_AMPK_DOWNSTREAM_OF_NMDARS|REACTOME_ACTIVATION_OF_NMDA_RECEPTORS_AND_POSTSYNAPTIC_EVENTS|REACTOME_ADAPTIVE_IMMUNE_SYSTEM|REACTOME_AGGREPHAGY|REACTOME_ANCHORING_OF_THE_BASAL_BODY_TO_THE_PLASMA_MEMBRANE|REACTOME_ASPARAGINE_N_LINKED_GLYCOSYLATION|REACTOME_ASSEMBLY_AND_CELL_SURFACE_PRESENTATION_OF_NMDA_RECEPTORS|REACTOME_AURKA_ACTIVATION_BY_TPX2|REACTOME_AUTOPHAGY|REACTOME_CARBO…
Q9CR26	Vacuolar protein sorting-associated protein VTA1 homolog OS=Mus musculus OX=10090 GN=Vta1 PE=1 SV=1	Vta1	0.434371	0.00823216	0.0611103		0	14.929	13	4	5	1	4	309	33.9	6.13	13.69	9.4975	9.61752	9.34255	9.73365	9.48574	9.94241	9.30136	9.87307	9.16651	9.79886	REACTOME_BUDDING_AND_MATURATION_OF_HIV_VIRION|REACTOME_DISEASE|REACTOME_ENDOSOMAL_SORTING_COMPLEX_REQUIRED_FOR_TRANSPORT_ESCRT_|REACTOME_HIV_INFECTION|REACTOME_HIV_LIFE_CYCLE|REACTOME_INFECTIOUS_DISEASE|REACTOME_MEMBRANE_TRAFFICKING|REACTOME_VESICLE_MEDIATED_TRANSPORT
Q8BXQ2	GPI transamidase component PIG-T OS=Mus musculus OX=10090 GN=Pigt PE=1 SV=2	Pigt	0.434346	0.00666861	0.0568775		0	28.34	10	5	8	2	5	582	65.7	8.4	27.01	10.4025	11.1666	10.6237	10.9985	10.7345	11.0558	10.8366	11.148	10.6558	11.0561	REACTOME_ATTACHMENT_OF_GPI_ANCHOR_TO_UPAR|REACTOME_POST_TRANSLATIONAL_MODIFICATION_SYNTHESIS_OF_GPI_ANCHORED_PROTEINS|REACTOME_POST_TRANSLATIONAL_PROTEIN_MODIFICATION
Q99LM3	Smoothelin-like protein 1 OS=Mus musculus OX=10090 GN=Smtnl1 PE=1 SV=1	Smtnl1	0.434068	0.0270082	0.104376		0.001	5.244	3	1	1	1	1	459	49.5	4.63	4.48	7.53737	8.11537	7.61677	8.31548	8.30994	8.39401	8.07236	8.24375	7.32861	7.9668	NA
Q61897	Keratin, type I cuticular Ha3-II OS=Mus musculus OX=10090 GN=Krt33b PE=1 SV=2	Krt33b	0.433222	0.289871	0.435728		0	30.315	23	8	13	1	1	404	45.8	4.82	37.24	9.97096	10.3728	9.87151	11.1974	9.93749	10.0229	10.4789	9.79628	9.61272	10.6483	REACTOME_DEVELOPMENTAL_BIOLOGY|REACTOME_FORMATION_OF_THE_CORNIFIED_ENVELOPE|REACTOME_KERATINIZATION
Q9D614	Isoform of Q9D0I4, Syntaxin-17 OS=Mus musculus OX=10090 GN=Stx17 PE=1 SV=1	Stx17	0.433024	0.0418236	0.132164		0.02	1.856	3	1	1	0	1	276	31.5	6.47	2.79	7.40739	7.86954	7.08	7.91662	7.82891	7.7886	7.40794	7.71757	7.25894	7.85597	REACTOME_ASPARAGINE_N_LINKED_GLYCOSYLATION|REACTOME_COPII_MEDIATED_VESICLE_TRANSPORT|REACTOME_ER_TO_GOLGI_ANTEROGRADE_TRANSPORT|REACTOME_MEMBRANE_TRAFFICKING|REACTOME_POST_TRANSLATIONAL_PROTEIN_MODIFICATION|REACTOME_TRANSPORT_TO_THE_GOLGI_AND_SUBSEQUENT_MODIFICATION|REACTOME_VESICLE_MEDIATED_TRANSPORT
Q505F5	Leucine-rich repeat-containing protein 47 OS=Mus musculus OX=10090 GN=Lrrc47 PE=1 SV=1	Lrrc47	0.432394	0.00729045	0.0587712		0	62.143	26	13	20	0	13	581	63.6	8.1	66.56	11.2913	12.0523	11.4931	11.9186	11.587	11.9541	11.6685	12.0052	11.5802	11.8518	NA
P51667	Myosin regulatory light chain 2, ventricular/cardiac muscle isoform OS=Mus musculus OX=10090 GN=Myl2 PE=1 SV=3	Myl2	0.432389	0.141196	0.268153		0	48.253	60	10	18	2	7	166	18.9	4.93	51.83	10.7469	11.4539	11.7581	12.9235	11.6545	11.4374	12.2216	12.5685	10.7158	10.8755	REACTOME_MUSCLE_CONTRACTION|REACTOME_SMOOTH_MUSCLE_CONTRACTION|REACTOME_STRIATED_MUSCLE_CONTRACTION
H3BJ86	Isoform of Q8VDR5, Transmembrane protein 267 OS=Mus musculus OX=10090 GN=Tmem267 PE=1 SV=1	Tmem267	0.432227	0.0576258	0.158818		0.001	4.34	8	2	2	0	2	238	26.8	9.66	5.22	8.05041	9.05973	8.34376	8.91416	8.50283	8.60763	8.45211	8.721	8.36418	8.57191	NA
Q99PF4	Cadherin-23 OS=Mus musculus OX=10090 GN=Cdh23 PE=1 SV=2	Cdh23	0.431964	0.116673	0.238899		0.035	1.373	0	1	1	0	1	3354	369.4	4.65	0	4.44886	5.66556	5.02731	5.36837	5.45976	5.70238	5.34847	5.2546	4.84914	5.30245	NA
Q9D0K2	Succinyl-CoA:3-ketoacid coenzyme A transferase 1, mitochondrial OS=Mus musculus OX=10090 GN=Oxct1 PE=1 SV=1	Oxct1	0.431039	0.0259003	0.102577		0	190.025	57	22	72	4	22	520	56	8.53	224.13	13.3505	14.1742	13.6453	14.1846	14.0611	14.1832	14.0996	14.3096	13.6011	14.0611	REACTOME_KETONE_BODY_METABOLISM|REACTOME_METABOLISM_OF_LIPIDS
Q9WUA5	Laforin OS=Mus musculus OX=10090 GN=Epm2a PE=1 SV=2	Epm2a	0.430039	0.0602951	0.162984		0	41.294	23	6	14	6	6	330	36.9	6.32	55.08	10.6841	11.7118	11.1742	11.546	11.5164	11.6298	11.585	11.7259	11.2476	11.7439	REACTOME_DISEASE|REACTOME_DISEASES_OF_CARBOHYDRATE_METABOLISM|REACTOME_DISEASES_OF_METABOLISM|REACTOME_GLYCOGEN_METABOLISM|REACTOME_GLYCOGEN_STORAGE_DISEASES|REACTOME_GLYCOGEN_SYNTHESIS|REACTOME_METABOLISM_OF_CARBOHYDRATES|REACTOME_MYOCLONIC_EPILEPSY_OF_LAFORA
Q3U1J4	DNA damage-binding protein 1 OS=Mus musculus OX=10090 GN=Ddb1 PE=1 SV=2	Ddb1	0.428109	0.0376844	0.125029		0	140.339	30	32	51	5	32	1140	126.8	5.26	161.88	12.9551	13.9354	13.3374	13.623	13.28	13.6391	13.5136	13.8139	13.3857	13.6009	REACTOME_DNA_DAMAGE_BYPASS|REACTOME_DNA_DAMAGE_RECOGNITION_IN_GG_NER|REACTOME_DNA_REPAIR|REACTOME_DUAL_INCISION_IN_GG_NER|REACTOME_DUAL_INCISION_IN_TC_NER|REACTOME_FORMATION_OF_INCISION_COMPLEX_IN_GG_NER|REACTOME_FORMATION_OF_TC_NER_PRE_INCISION_COMPLEX|REACTOME_GLOBAL_GENOME_NUCLEOTIDE_EXCISION_REPAIR_GG_NER_|REACTOME_NEDDYLATION|REACTOME_NUCLEOTIDE_EXCISION_REPAIR|REACTOME_POST_TRANSLATIONAL_PR…
Q3TN85	Isoform of P54726, UV excision repair protein RAD23 homolog A (Fragment) OS=Mus musculus OX=10090 GN=Rad23a PE=1 SV=1	Rad23a	0.427616	0.0353164	0.120931		0	20.841	10	4	11	0	3	322	34.8	4.69	32.96	11.2431	12.1688	11.5938	12.0281	11.5606	11.981	11.8061	12.0186	11.5368	11.6819	REACTOME_DEUBIQUITINATION|REACTOME_DNA_DAMAGE_RECOGNITION_IN_GG_NER|REACTOME_DNA_REPAIR|REACTOME_FORMATION_OF_INCISION_COMPLEX_IN_GG_NER|REACTOME_GLOBAL_GENOME_NUCLEOTIDE_EXCISION_REPAIR_GG_NER_|REACTOME_JOSEPHIN_DOMAIN_DUBS|REACTOME_NUCLEOTIDE_EXCISION_REPAIR|REACTOME_POST_TRANSLATIONAL_PROTEIN_MODIFICATION
Q80W22	Threonine synthase-like 2 OS=Mus musculus OX=10090 GN=Thnsl2 PE=1 SV=1	Thnsl2	0.427546	0.0289869	0.108682		0	20.431	12	5	5	4	5	483	54.2	6.39	13.52	8.88175	9.61525	9.02947	9.37902	9.39777	9.3999	9.31721	9.72379	9.11367	9.75965	NA
P24547	Inosine-5'-monophosphate dehydrogenase 2 OS=Mus musculus OX=10090 GN=Impdh2 PE=1 SV=2	Impdh2	0.427328	0.0110745	0.0685948		0	71.193	32	12	16	2	12	514	55.8	7.28	62.97	11.2572	12.0124	11.434	11.769	11.3688	11.8459	11.5164	11.9096	11.4629	11.6391	REACTOME_DISEASE|REACTOME_INFECTIOUS_DISEASE|REACTOME_INNATE_IMMUNE_SYSTEM|REACTOME_METABOLISM_OF_NUCLEOTIDES|REACTOME_NEUTROPHIL_DEGRANULATION|REACTOME_NUCLEOBASE_BIOSYNTHESIS|REACTOME_NUCLEOTIDE_SALVAGE|REACTOME_POTENTIAL_THERAPEUTICS_FOR_SARS|REACTOME_PURINE_RIBONUCLEOSIDE_MONOPHOSPHATE_BIOSYNTHESIS|REACTOME_PURINE_SALVAGE|REACTOME_SARS_COV_INFECTIONS
Q3TC46	Protein PAT1 homolog 1 OS=Mus musculus OX=10090 GN=Patl1 PE=1 SV=2	Patl1	0.427324	0.0442048	0.136686		0.001	5.292	2	1	1	1	1	770	86.7	6.37	3.82	6.56136	6.66238	6.40895	7.30537	6.9435	7.09739	6.50123	6.88201	6.46698	7.07148	REACTOME_DEADENYLATION_DEPENDENT_MRNA_DECAY|REACTOME_METABOLISM_OF_RNA|REACTOME_MRNA_DECAY_BY_5_TO_3_EXORIBONUCLEASE
Q9D8B7	Junctional adhesion molecule C OS=Mus musculus OX=10090 GN=Jam3 PE=1 SV=2	Jam3	0.425987	0.157236	0.289082		0.021	1.75	3	1	3	1	1	310	34.8	7.03	7.09	9.80469	11.1941	10.4148	10.6538	10.6387	10.7043	10.7708	10.8833	10.4044	10.7278	REACTOME_CELL_SURFACE_INTERACTIONS_AT_THE_VASCULAR_WALL|REACTOME_EXTRACELLULAR_MATRIX_ORGANIZATION|REACTOME_HEMOSTASIS|REACTOME_INTEGRIN_CELL_SURFACE_INTERACTIONS
P58774	Tropomyosin beta chain OS=Mus musculus OX=10090 GN=Tpm2 PE=1 SV=1	Tpm2	0.424365	0.302794	0.446856		0	467.055	94	73	696	7	9	284	32.8	4.7	2167.35	15.4945	16.9392	16.155	17.0381	16.6122	16.3476	17.4583	16.9676	16.2507	16.8002	REACTOME_MUSCLE_CONTRACTION|REACTOME_SMOOTH_MUSCLE_CONTRACTION|REACTOME_STRIATED_MUSCLE_CONTRACTION
Q9D8P4	39S ribosomal protein L17, mitochondrial OS=Mus musculus OX=10090 GN=Mrpl17 PE=1 SV=1	Mrpl17	0.42384	0.0367577	0.1232		0.001	8.882	14	3	3	0	3	176	20.2	9.82	8.26	9.37395	9.56367	9.39936	9.62438	9.63414	9.85429	9.59732	10.1997	9.39121	10.2731	REACTOME_MITOCHONDRIAL_TRANSLATION|REACTOME_TRANSLATION
Q9D820	Prolyl-tRNA synthetase associated domain-containing protein 1 OS=Mus musculus OX=10090 GN=Prorsd1 PE=1 SV=1	Prorsd1	0.422865	0.0059766	0.0544339		0	49.416	47	6	13	1	6	169	18.9	6.14	56.41	10.4142	11.0441	10.6161	11.0302	10.8593	11.0319	10.8334	11.1846	10.592	11.1386	NA
F6VG99	Isoform of E9PYF4, LIM domain only 7 (Fragment) OS=Mus musculus OX=10090 GN=Lmo7 PE=1 SV=1	Lmo7	0.422767	0.0106655	0.0677658		0	96.67	21	24	31	1	24	1604	181.8	6.62	96.01	11.3202	12.0616	11.5565	11.9467	11.4797	11.9379	11.6472	12.0076	11.6437	11.8071	REACTOME_ADAPTIVE_IMMUNE_SYSTEM|REACTOME_ANTIGEN_PROCESSING_UBIQUITINATION_PROTEASOME_DEGRADATION|REACTOME_CLASS_I_MHC_MEDIATED_ANTIGEN_PROCESSING_PRESENTATION|REACTOME_NEDDYLATION|REACTOME_POST_TRANSLATIONAL_PROTEIN_MODIFICATION
Q8R016	Bleomycin hydrolase OS=Mus musculus OX=10090 GN=Blmh PE=1 SV=1	Blmh	0.422257	0.0252832	0.101562		0	103.289	45	16	33	4	16	455	52.5	6.48	116.21	12.4505	13.3081	12.7061	13.0083	12.629	13.1202	12.8337	13.1397	12.778	12.9322	REACTOME_ADAPTIVE_IMMUNE_SYSTEM|REACTOME_ANTIGEN_PROCESSING_UBIQUITINATION_PROTEASOME_DEGRADATION|REACTOME_CLASS_I_MHC_MEDIATED_ANTIGEN_PROCESSING_PRESENTATION
P51830	Adenylate cyclase type 9 OS=Mus musculus OX=10090 GN=Adcy9 PE=1 SV=1	Adcy9	0.418671	0.0137259	0.0758003		0.003	3.634	1	1	1	0	1	1353	150.9	7.21	3.51	7.35265	7.73441	7.32507	7.74325	7.66471	7.86599	7.47836	7.78161	7.26896	8.05783	REACTOME_ADENYLATE_CYCLASE_ACTIVATING_PATHWAY|REACTOME_ADENYLATE_CYCLASE_INHIBITORY_PATHWAY|REACTOME_ADORA2B_MEDIATED_ANTI_INFLAMMATORY_CYTOKINES_PRODUCTION|REACTOME_ANTI_INFLAMMATORY_RESPONSE_FAVOURING_LEISHMANIA_PARASITE_INFECTION|REACTOME_AQUAPORIN_MEDIATED_TRANSPORT|REACTOME_CA_DEPENDENT_EVENTS|REACTOME_DAG_AND_IP3_SIGNALING|REACTOME_DISEASE|REACTOME_FCGR3A_MEDIATED_IL10_SYNTHESIS|REACTOME_G_…
Q8BRK9	Alpha-mannosidase 2x OS=Mus musculus OX=10090 GN=Man2a2 PE=1 SV=2	Man2a2	0.417078	0.00601789	0.0544339		0	42.271	9	8	11	1	7	1152	130.6	6.87	37.33	10.1902	10.898	10.3916	10.6678	10.5578	10.87	10.5015	10.8382	10.555	11.0073	REACTOME_ASPARAGINE_N_LINKED_GLYCOSYLATION|REACTOME_INTRA_GOLGI_AND_RETROGRADE_GOLGI_TO_ER_TRAFFIC|REACTOME_INTRA_GOLGI_TRAFFIC|REACTOME_MEMBRANE_TRAFFICKING|REACTOME_N_GLYCAN_ANTENNAE_ELONGATION_IN_THE_MEDIAL_TRANS_GOLGI|REACTOME_POST_TRANSLATIONAL_PROTEIN_MODIFICATION|REACTOME_REACTIONS_SPECIFIC_TO_THE_COMPLEX_N_GLYCAN_SYNTHESIS_PATHWAY|REACTOME_TRANSPORT_TO_THE_GOLGI_AND_SUBSEQUENT_MODIFICATIO…
Q8BW56	Glycosyltransferase-like domain-containing protein 1 OS=Mus musculus OX=10090 GN=Gtdc1 PE=2 SV=2	Gtdc1	0.416595	0.0096716	0.0654233		0.001	8.794	10	3	3	0	3	445	51	7.53	9.52	8.07773	8.69714	8.2447	8.7432	8.61087	8.83876	8.55821	8.73632	8.21919	8.77825	NA
Q80VJ3	2'-deoxynucleoside 5'-phosphate N-hydrolase 1 OS=Mus musculus OX=10090 GN=Dnph1 PE=1 SV=2	Dnph1	0.416104	0.0327795	0.115842		0	26.029	26	4	7	4	4	173	19	5.38	23.53	9.22791	9.98252	9.3652	9.87698	9.75869	9.83937	9.77557	9.92295	9.38514	9.97122	REACTOME_METABOLISM_OF_NUCLEOTIDES|REACTOME_NUCLEOBASE_CATABOLISM|REACTOME_PURINE_CATABOLISM
Q8VE38	Oxidoreductase NAD-binding domain-containing protein 1 OS=Mus musculus OX=10090 GN=Oxnad1 PE=1 SV=2	Oxnad1	0.415637	0.00871873	0.0624497		0	17.167	16	5	8	0	5	311	34.7	8.13	15.79	9.71093	10.3926	9.99527	10.3802	10.4225	10.5957	10.3454	10.6642	9.96007	10.4796	NA
A0A494BBP4	Isoform of Q61810, Latent-transforming growth factor beta-binding protein 3 (Fragment) OS=Mus musculus OX=10090 GN=Ltbp3 PE=1 SV=1	Ltbp3	0.415493	0.0243815	0.100188		0.001	4.326	4	1	1	0	1	415	45.8	4.88	3.91	5.98949	6.37127	5.87781	6.55377	6.29457	6.37341	6.11639	6.37493	5.96377	6.64612	REACTOME_ELASTIC_FIBRE_FORMATION|REACTOME_EXTRACELLULAR_MATRIX_ORGANIZATION|REACTOME_MOLECULES_ASSOCIATED_WITH_ELASTIC_FIBRES|REACTOME_POST_TRANSLATIONAL_PROTEIN_MODIFICATION|REACTOME_REGULATION_OF_INSULIN_LIKE_GROWTH_FACTOR_IGF_TRANSPORT_AND_UPTAKE_BY_INSULIN_LIKE_GROWTH_FACTOR_BINDING_PROTEINS_IGFBPS_
A0A0R4J034	Isoform of Q99K01, Pyridoxal-dependent decarboxylase domain-containing protein 1 OS=Mus musculus OX=10090 GN=Pdxdc1 PE=1 SV=1	Pdxdc1	0.41549	0.0546971	0.154201		0	10.401	6	3	3	0	3	789	87.4	5.67	8.15	9.49012	9.52306	9.20299	9.51287	8.68585	9.59803	8.727	9.32947	9.06904	9.28902	NA
E9PY39	Gm20431 readthrough, Predicted gene 20431 OS=Mus musculus OX=10090 GN=Gm20431 PE=3 SV=1	Gm20431	0.415267	0.00647109	0.0558214		0	37.966	24	8	23	0	3	371	42.1	6.76	65.41	12.044	12.755	12.2191	12.6664	12.4146	12.6808	12.4523	12.7641	12.3233	12.6633	NA
O08528	Hexokinase-2 OS=Mus musculus OX=10090 GN=Hk2 PE=1 SV=1	Hk2	0.415072	0.108733	0.228283		0	206.82	43	37	94	1	33	917	102.5	6.11	286.85	13.4806	14.6515	13.9976	14.4228	14.3829	14.4812	14.5227	14.5699	14.0751	14.4089	REACTOME_DISEASE|REACTOME_DISORDERS_OF_TRANSMEMBRANE_TRANSPORTERS|REACTOME_GLUCOSE_METABOLISM|REACTOME_GLYCOLYSIS|REACTOME_INNATE_IMMUNE_SYSTEM|REACTOME_METABOLISM_OF_CARBOHYDRATES|REACTOME_NEUTROPHIL_DEGRANULATION|REACTOME_SLC_TRANSPORTER_DISORDERS
Q6P1B9	Isoform of O08539, Bin1 protein OS=Mus musculus OX=10090 GN=Bin1 PE=1 SV=1	Bin1	0.414821	0.122495	0.245363		0	226.231	59	29	132	0	27	477	52.7	5.24	421.28	14.564	15.6532	15.0257	15.3964	14.7663	15.3418	15.0935	15.3438	15.2985	15.0868	REACTOME_CLATHRIN_MEDIATED_ENDOCYTOSIS|REACTOME_MEMBRANE_TRAFFICKING|REACTOME_VESICLE_MEDIATED_TRANSPORT
D3YWF6	Isoform of Q7TQI3, Ubiquitinyl hydrolase 1 OS=Mus musculus OX=10090 GN=Otub1 PE=1 SV=1	Otub1	0.414801	0.00873396	0.0624552		0	48.547	42	8	21	0	8	241	28	5.29	78.72	11.7992	12.5547	12.0454	12.3467	12.0239	12.4136	12.1948	12.5175	12.0395	12.3443	REACTOME_DEUBIQUITINATION|REACTOME_OVARIAN_TUMOR_DOMAIN_PROTEASES|REACTOME_POST_TRANSLATIONAL_PROTEIN_MODIFICATION|REACTOME_UB_SPECIFIC_PROCESSING_PROTEASES
A2AEP5	Isoform of Q8K448, Cholesterol transporter ABCA5 (Fragment) OS=Mus musculus OX=10090 GN=Abca5 PE=1 SV=8	Abca5	0.414415	0.0175226	0.0857436		0.017	2.115	1	1	1	0	1	1194	134.5	7.01	2.15	5.93002	6.56928	6.10469	6.17227	6.08028	6.69786	6.15335	6.45558	6.07429	6.51971	REACTOME_ABC_FAMILY_PROTEINS_MEDIATED_TRANSPORT|REACTOME_ABC_TRANSPORTERS_IN_LIPID_HOMEOSTASIS|REACTOME_FOXO_MEDIATED_TRANSCRIPTION|REACTOME_FOXO_MEDIATED_TRANSCRIPTION_OF_OXIDATIVE_STRESS_METABOLIC_AND_NEURONAL_GENES|REACTOME_RNA_POLYMERASE_II_TRANSCRIPTION|REACTOME_TRANSPORT_OF_SMALL_MOLECULES
P62827	GTP-binding nuclear protein Ran OS=Mus musculus OX=10090 GN=Ran PE=1 SV=3	Ran	0.414356	0.0108797	0.0684361		0	28.683	27	5	21	2	5	216	24.4	7.49	77.26	12.116	12.8158	12.1682	12.5507	11.9685	12.4094	12.0773	12.5059	12.2169	12.3368	REACTOME_CELL_CYCLE|REACTOME_CELL_CYCLE_MITOTIC|REACTOME_DISEASE|REACTOME_EXPORT_OF_VIRAL_RIBONUCLEOPROTEINS_FROM_NUCLEUS|REACTOME_GENE_SILENCING_BY_RNA|REACTOME_HIV_INFECTION|REACTOME_HIV_LIFE_CYCLE|REACTOME_HOST_INTERACTIONS_OF_HIV_FACTORS|REACTOME_INFECTIOUS_DISEASE|REACTOME_INFLUENZA_INFECTION|REACTOME_INTERACTIONS_OF_REV_WITH_HOST_CELLULAR_PROTEINS|REACTOME_M_PHASE|REACTOME_METABOLISM_OF_LIP…
A0A0U1RPY6	Isoform of Q9JKW0, ADP-ribosylation factor-like protein 6-interacting protein 1 (Fragment) OS=Mus musculus OX=10090 GN=Arl6ip1 PE=1 SV=1	Arl6ip1	0.413925	0.0182188	0.0872587		0.018	2.019	9	1	1	0	1	111	12.9	8.84	2.37	8.14829	8.36886	7.96011	8.76122	8.16655	8.58162	8.0798	8.28617	8.07722	8.50372	NA
O89104	Synaptophysin-like protein 2 OS=Mus musculus OX=10090 GN=Sypl2 PE=1 SV=1	Sypl2	0.413903	0.108752	0.228283		0	42.606	26	5	21	5	5	264	29.2	5.6	72.54	11.1217	12.3338	11.7248	11.9547	11.8561	12.1525	12.0195	12.2099	11.9049	12.0455	NA
A2ASS6-3	Isoform of A2ASS6, Isoform 3 of Titin OS=Mus musculus OX=10090 GN=Ttn PE=1 SV=1	Ttn	0.413353	0.0804072	0.191429		0	1948.26	52	258	1382	51	51	5508	618.9	5.68	4874.79	12.9848	14.063	13.4628	13.848	13.7184	13.809	13.8367	13.9627	13.541	13.9277	REACTOME_CELL_DEATH_SIGNALLING_VIA_NRAGE_NRIF_AND_NADE|REACTOME_DEATH_RECEPTOR_SIGNALLING|REACTOME_G_ALPHA_12_13_SIGNALLING_EVENTS|REACTOME_HEMOSTASIS|REACTOME_MUSCLE_CONTRACTION|REACTOME_NEDDYLATION|REACTOME_NRAGE_SIGNALS_DEATH_THROUGH_JNK|REACTOME_P75_NTR_RECEPTOR_MEDIATED_SIGNALLING|REACTOME_PLATELET_ACTIVATION_SIGNALING_AND_AGGREGATION|REACTOME_POST_TRANSLATIONAL_PROTEIN_MODIFICATION|REACTOME…
E9PV66	Myosin XVIIIb OS=Mus musculus OX=10090 GN=Myo18b PE=1 SV=1	Myo18b	0.413353	0.0389027	0.127638		0	118.002	11	21	31	20	20	2605	288.7	6.67	112.86	11.6259	12.5654	11.9131	12.2858	11.9498	12.2951	12.1116	12.3537	12.0377	12.205	REACTOME_DISEASE|REACTOME_DISEASES_OF_SIGNAL_TRANSDUCTION_BY_GROWTH_FACTOR_RECEPTORS_AND_SECOND_MESSENGERS|REACTOME_FGFR1_MUTANT_RECEPTOR_ACTIVATION|REACTOME_SIGNALING_BY_CYTOSOLIC_FGFR1_FUSION_MUTANTS|REACTOME_SIGNALING_BY_FGFR_IN_DISEASE|REACTOME_SIGNALING_BY_FGFR1_IN_DISEASE
Q9QYR9	Acyl-coenzyme A thioesterase 2, mitochondrial OS=Mus musculus OX=10090 GN=Acot2 PE=1 SV=2	Acot2	0.411588	0.133859	0.259761		0	94.405	41	16	29	7	15	453	49.6	7.36	103.42	12.0858	13.1103	12.4251	13.2853	12.8635	12.8486	12.9443	13.07	12.6875	12.7499	REACTOME_BETA_OXIDATION_OF_VERY_LONG_CHAIN_FATTY_ACIDS|REACTOME_FATTY_ACID_METABOLISM|REACTOME_METABOLISM_OF_LIPIDS|REACTOME_MITOCHONDRIAL_FATTY_ACID_BETA_OXIDATION|REACTOME_PEROXISOMAL_LIPID_METABOLISM|REACTOME_PEROXISOMAL_PROTEIN_IMPORT|REACTOME_PROTEIN_LOCALIZATION
A0A0R4J224	Isoform of Q9JMH3, Exo-alpha-sialidase OS=Mus musculus OX=10090 GN=Neu2 PE=1 SV=1	Neu2	0.411383	0.0392759	0.128381		0	15.817	11	4	5	0	4	385	43.1	7.56	18.16	9.45627	10.3395	9.70335	10.1717	10.1327	10.2192	10.095	10.3052	9.58055	9.98907	REACTOME_ASPARAGINE_N_LINKED_GLYCOSYLATION|REACTOME_BIOSYNTHESIS_OF_THE_N_GLYCAN_PRECURSOR_DOLICHOL_LIPID_LINKED_OLIGOSACCHARIDE_LLO_AND_TRANSFER_TO_A_NASCENT_PROTEIN|REACTOME_GLYCOSPHINGOLIPID_METABOLISM|REACTOME_METABOLISM_OF_LIPIDS|REACTOME_POST_TRANSLATIONAL_PROTEIN_MODIFICATION|REACTOME_SIALIC_ACID_METABOLISM|REACTOME_SPHINGOLIPID_METABOLISM|REACTOME_SYNTHESIS_OF_SUBSTRATES_IN_N_GLYCAN_BIOSY…
P60840	Alpha-endosulfine OS=Mus musculus OX=10090 GN=Ensa PE=1 SV=1	Ensa	0.410792	0.00784578	0.0603378		0	27.036	49	5	10	0	4	121	13.3	7.24	33.58	10.1286	10.5643	10.1128	10.7032	10.3567	10.5797	10.4394	10.6544	10.1386	10.7284	REACTOME_CELL_CYCLE|REACTOME_CELL_CYCLE_MITOTIC|REACTOME_M_PHASE|REACTOME_MASTL_FACILITATES_MITOTIC_PROGRESSION|REACTOME_MITOTIC_PROPHASE
Q8BTE0	Succinate dehydrogenase assembly factor 4, mitochondrial OS=Mus musculus OX=10090 GN=Sdhaf4 PE=3 SV=2	Sdhaf4	0.409773	0.0802974	0.191429		0.002	3.927	15	1	2	1	1	104	11.9	9.5	3.7	7.55746	7.295	7.22646	7.8155	7.40061	7.7886	7.15671	7.79332	7.07948	7.77718	NA
Q3TTY5	Keratin, type II cytoskeletal 2 epidermal OS=Mus musculus OX=10090 GN=Krt2 PE=1 SV=1	Krt2	0.40877	0.416625	0.557063		0	53.341	8	11	20	5	6	707	70.9	8.06	57.33	10.9205	11.9732	10.5194	12.0967	10.7149	10.2231	11.3163	10.5367	12.2205	12.9058	REACTOME_DEVELOPMENTAL_BIOLOGY|REACTOME_FORMATION_OF_THE_CORNIFIED_ENVELOPE|REACTOME_INNATE_IMMUNE_SYSTEM|REACTOME_KERATINIZATION|REACTOME_NEUTROPHIL_DEGRANULATION
Q9JHK4	Geranylgeranyl transferase type-2 subunit alpha OS=Mus musculus OX=10090 GN=Rabggta PE=1 SV=1	Rabggta	0.408084	0.0224177	0.096419		0	31.409	15	8	9	0	8	567	64.9	5.8	28.06	10.2532	11.1017	10.5722	10.9099	10.7328	11.0141	10.8789	11.0948	10.568	10.925	REACTOME_POST_TRANSLATIONAL_PROTEIN_MODIFICATION|REACTOME_RAB_GERANYLGERANYLATION|REACTOME_RNA_POLYMERASE_II_TRANSCRIPTION|REACTOME_TP53_REGULATES_TRANSCRIPTION_OF_CELL_DEATH_GENES|REACTOME_TP53_REGULATES_TRANSCRIPTION_OF_SEVERAL_ADDITIONAL_CELL_DEATH_GENES_WHOSE_SPECIFIC_ROLES_IN_P53_DEPENDENT_APOPTOSIS_REMAIN_UNCERTAIN|REACTOME_TRANSCRIPTIONAL_REGULATION_BY_TP53
Q99P30	Peroxisomal coenzyme A diphosphatase NUDT7 OS=Mus musculus OX=10090 GN=Nudt7 PE=1 SV=2	Nudt7	0.40797	0.114591	0.236424		0.002	3.777	6	1	2	0	1	236	26.8	6.34	4.77	5.62792	6.13824	5.71575	6.17227	6.61623	6.38636	6.09044	6.36478	5.7483	6.77684	REACTOME_FATTY_ACID_METABOLISM|REACTOME_METABOLISM_OF_LIPIDS|REACTOME_PEROXISOMAL_LIPID_METABOLISM|REACTOME_PEROXISOMAL_PROTEIN_IMPORT|REACTOME_PROTEIN_LOCALIZATION
Q5NCS9	Mitochondrial dynamics protein MID49 OS=Mus musculus OX=10090 GN=Mief2 PE=1 SV=1	Mief2	0.407761	0.0224312	0.096419		0	20.171	10	4	5	4	4	454	49.6	5.4	16.88	9.35585	10.1286	9.58852	10.0335	9.9688	10.0525	9.92489	10.2174	9.56905	10.0139	NA
P50396	Rab GDP dissociation inhibitor alpha OS=Mus musculus OX=10090 GN=Gdi1 PE=1 SV=3	Gdi1	0.407675	0.0108255	0.0683415		0	96.883	51	16	41	7	12	447	50.5	5.08	118.63	11.5008	12.2667	11.7674	12.1037	11.8872	12.2024	12.0023	12.2725	11.7802	12.1309	REACTOME_INNATE_IMMUNE_SYSTEM|REACTOME_MEMBRANE_TRAFFICKING|REACTOME_NEUTROPHIL_DEGRANULATION|REACTOME_RAB_GEFS_EXCHANGE_GTP_FOR_GDP_ON_RABS|REACTOME_RAB_REGULATION_OF_TRAFFICKING|REACTOME_RHO_GTPASE_CYCLE|REACTOME_SIGNALING_BY_RHO_GTPASES|REACTOME_VESICLE_MEDIATED_TRANSPORT
D6RCU5	Isoform of Q80WJ6, ATP-binding cassette sub-family C member 12 OS=Mus musculus OX=10090 GN=Abcc12 PE=4 SV=1	Abcc12	0.406898	0.099442	0.215872		0.033	1.409	2	1	2	0	1	664	74.1	9.63	4.46	8.52957	8.85441	8.54277	9.0538	9.39083	9.17449	8.89562	9.33993	8.54055	9.51119	REACTOME_ABC_FAMILY_PROTEINS_MEDIATED_TRANSPORT|REACTOME_ABC_TRANSPORTER_DISORDERS|REACTOME_ARACHIDONIC_ACID_METABOLISM|REACTOME_BILE_ACID_AND_BILE_SALT_METABOLISM|REACTOME_CARDIAC_CONDUCTION|REACTOME_COBALAMIN_CBL_VITAMIN_B12_TRANSPORT_AND_METABOLISM|REACTOME_DISEASE|REACTOME_DISORDERS_OF_TRANSMEMBRANE_TRANSPORTERS|REACTOME_FATTY_ACID_METABOLISM|REACTOME_GLYCOSAMINOGLYCAN_METABOLISM|REACTOME_HEM…
Q8K4L2	Isoform of Q8K4L3, Archvillin OS=Mus musculus OX=10090 GN=Svil PE=1 SV=1	Svil	0.406707	0.00636675	0.0555579		0	123.418	18	27	36	0	27	2031	226.7	7.94	105.73	11.6689	12.3562	11.8858	12.2545	11.8485	12.2646	11.9363	12.2831	11.8925	12.1072	NA
A2AL71	Isoform of Q8BSY0, Aspartyl/asparaginyl beta-hydroxylase (Fragment) OS=Mus musculus OX=10090 GN=Asph PE=1 SV=1	Asph	0.406536	0.100064	0.216807		0	10.175	34	2	12	0	1	73	8	4.25	38.54	10.075	11.1298	10.2313	10.7169	10.7902	10.8891	11.0298	10.9831	10.1626	10.6026	REACTOME_CARDIAC_CONDUCTION|REACTOME_ION_CHANNEL_TRANSPORT|REACTOME_ION_HOMEOSTASIS|REACTOME_MUSCLE_CONTRACTION|REACTOME_STIMULI_SENSING_CHANNELS|REACTOME_TRANSPORT_OF_SMALL_MOLECULES
Q8BMF3	NADP-dependent malic enzyme, mitochondrial OS=Mus musculus OX=10090 GN=Me3 PE=1 SV=2	Me3	0.406475	0.0818885	0.193251		0	93.877	32	16	29	13	15	604	67.1	7.83	102.85	11.8829	12.938	12.3121	12.7315	12.6616	12.7539	12.8807	12.9747	12.3925	12.764	REACTOME_CITRIC_ACID_CYCLE_TCA_CYCLE_|REACTOME_METABOLISM_OF_LIPIDS|REACTOME_PYRUVATE_METABOLISM|REACTOME_PYRUVATE_METABOLISM_AND_CITRIC_ACID_TCA_CYCLE|REACTOME_REGULATION_OF_LIPID_METABOLISM_BY_PPARALPHA|REACTOME_THE_CITRIC_ACID_TCA_CYCLE_AND_RESPIRATORY_ELECTRON_TRANSPORT
P12849	cAMP-dependent protein kinase type I-beta regulatory subunit OS=Mus musculus OX=10090 GN=Prkar1b PE=1 SV=2	Prkar1b	0.406133	0.0877922	0.201073		0	21.22	14	5	10	0	1	381	43.2	5.96	26.86	7.99129	8.04623	7.8187	7.87902	7.32394	8.16222	7.483	8.32796	7.69523	7.92739	REACTOME_ACTIVATION_OF_NMDA_RECEPTORS_AND_POSTSYNAPTIC_EVENTS|REACTOME_ADORA2B_MEDIATED_ANTI_INFLAMMATORY_CYTOKINES_PRODUCTION|REACTOME_ANTI_INFLAMMATORY_RESPONSE_FAVOURING_LEISHMANIA_PARASITE_INFECTION|REACTOME_AQUAPORIN_MEDIATED_TRANSPORT|REACTOME_CA_DEPENDENT_EVENTS|REACTOME_CREB1_PHOSPHORYLATION_THROUGH_THE_ACTIVATION_OF_ADENYLATE_CYCLASE|REACTOME_DAG_AND_IP3_SIGNALING|REACTOME_DARPP_32_EVENT…
A2BFB0	Isoform of O08609, Max-like protein X OS=Mus musculus OX=10090 GN=Mlx PE=1 SV=1	Mlx	0.405861	0.00725727	0.0587712		0.001	8.004	7	2	2	0	2	298	33.3	6.62	6.06	6.56036	6.98197	6.73169	7.15437	6.97915	7.22999	6.99827	7.2447	6.33867	7.02642	REACTOME_CHREBP_ACTIVATES_METABOLIC_GENE_EXPRESSION|REACTOME_INTEGRATION_OF_ENERGY_METABOLISM
P56399	Ubiquitin carboxyl-terminal hydrolase 5 OS=Mus musculus OX=10090 GN=Usp5 PE=1 SV=1	Usp5	0.405505	0.028501	0.107681		0	165.539	37	26	54	0	26	858	95.8	5.01	196.94	12.4941	13.3428	12.8107	13.1234	12.6862	13.1218	12.8837	13.1836	12.8553	12.986	REACTOME_DEUBIQUITINATION|REACTOME_INTRACELLULAR_SIGNALING_BY_SECOND_MESSENGERS|REACTOME_POST_TRANSLATIONAL_PROTEIN_MODIFICATION|REACTOME_PROTEIN_UBIQUITINATION|REACTOME_PTEN_REGULATION|REACTOME_REGULATION_OF_PTEN_STABILITY_AND_ACTIVITY|REACTOME_SYNTHESIS_OF_ACTIVE_UBIQUITIN_ROLES_OF_E1_AND_E2_ENZYMES|REACTOME_UB_SPECIFIC_PROCESSING_PROTEASES
Q9D9J3	Actin-related protein T1 OS=Mus musculus OX=10090 GN=Actrt1 PE=2 SV=1	Actrt1	0.405144	0.0861458	0.198532		0.054	1.181	2	1	2	1	1	376	42.2	5.38	4.84	8.49771	9.51943	8.74377	9.21541	9.08304	9.12842	9.21999	9.27205	8.85306	9.28798	NA
D3Z1D3	Cardiac-enriched FHL2-interacting protein OS=Mus musculus OX=10090 GN=CEFIP PE=1 SV=1	CEFIP	0.4031	0.0454439	0.138488		0	31.647	8	7	10	7	7	1412	154.4	6.25	39	9.56133	10.3892	9.79743	10.4244	10.2877	10.3644	10.1814	10.3715	9.88881	10.1827	NA
P10630	Eukaryotic initiation factor 4A-II OS=Mus musculus OX=10090 GN=Eif4a2 PE=1 SV=2	Eif4a2	0.401513	0.0368162	0.123203		0	132.996	52	22	65	0	9	407	46.4	5.48	221.95	13.3603	14.2636	13.6917	14.0544	13.6454	13.9653	13.8591	14.1267	13.7493	13.9034	REACTOME_ACTIVATION_OF_THE_MRNA_UPON_BINDING_OF_THE_CAP_BINDING_COMPLEX_AND_EIFS_AND_SUBSEQUENT_BINDING_TO_43S|REACTOME_ANTIVIRAL_MECHANISM_BY_IFN_STIMULATED_GENES|REACTOME_CYTOKINE_SIGNALING_IN_IMMUNE_SYSTEM|REACTOME_DEADENYLATION_DEPENDENT_MRNA_DECAY|REACTOME_DEADENYLATION_OF_MRNA|REACTOME_EUKARYOTIC_TRANSLATION_INITIATION|REACTOME_INTERFERON_SIGNALING|REACTOME_METABOLISM_OF_RNA|REACTOME_TRANSL…
P55302	Alpha-2-macroglobulin receptor-associated protein OS=Mus musculus OX=10090 GN=Lrpap1 PE=1 SV=1	Lrpap1	0.400597	0.0234511	0.0983481		0	82.449	41	14	47	8	14	360	42.2	7.87	132.84	12.8072	13.5723	13.0413	13.5837	13.2083	13.3455	13.302	13.597	13.173	13.4364	NA
Q8R3W2	RIKEN cDNA 0610009B22 gene OS=Mus musculus OX=10090 GN=0610009B22Rik PE=2 SV=1	0610009B22Rik	0.400194	0.0168432	0.0844247		0.001	6.899	21	3	3	1	1	140	16.4	6.61	6.68	8.62811	8.69194	8.27956	8.91152	8.66006	8.99405	8.54879	8.93524	8.47	9.05473	REACTOME_ASPARAGINE_N_LINKED_GLYCOSYLATION|REACTOME_COPII_MEDIATED_VESICLE_TRANSPORT|REACTOME_ER_TO_GOLGI_ANTEROGRADE_TRANSPORT|REACTOME_MEMBRANE_TRAFFICKING|REACTOME_POST_TRANSLATIONAL_PROTEIN_MODIFICATION|REACTOME_RAB_GEFS_EXCHANGE_GTP_FOR_GDP_ON_RABS|REACTOME_RAB_REGULATION_OF_TRAFFICKING|REACTOME_TRANSPORT_TO_THE_GOLGI_AND_SUBSEQUENT_MODIFICATION|REACTOME_VESICLE_MEDIATED_TRANSPORT
Q8CG76	Aflatoxin B1 aldehyde reductase member 2 OS=Mus musculus OX=10090 GN=Akr7a2 PE=1 SV=3	Akr7a2	0.399798	0.0380054	0.125671		0	44.558	25	8	17	8	8	367	40.6	8.12	60	11.7062	12.5198	12.0125	12.598	12.1999	12.5005	12.3975	12.5096	12.1748	12.3619	NA
Q9CQU3	Protein RER1 OS=Mus musculus OX=10090 GN=Rer1 PE=1 SV=1	Rer1	0.399626	0.00807984	0.0608977		0	14.716	13	3	6	3	3	196	23	9.51	17.48	10.936	11.3176	10.8721	11.2131	10.5919	11.2355	10.7127	11.196	10.7896	10.9381	NA
Q3UPI1	Golgi-associated kinase 1B OS=Mus musculus OX=10090 GN=GaskbB PE=2 SV=1	GaskbB	0.399073	0.186727	0.324235		0.057	1.162	2	1	1	1	1	517	58.3	9.7	2.43	6.88929	6.84015	6.82918	7.87634	7.62091	7.39723	7.05506	7.38316	6.85638	7.7493	NA
Q9D289	Trafficking protein particle complex subunit 6B OS=Mus musculus OX=10090 GN=Trappc6b PE=1 SV=1	Trappc6b	0.397974	0.0241588	0.0999244		0	10.299	13	2	2	0	2	158	17.9	8.68	8.78	9.36512	9.71932	9.3061	9.48483	8.95591	9.69247	9.10052	9.66837	9.28293	9.43545	REACTOME_ASPARAGINE_N_LINKED_GLYCOSYLATION|REACTOME_COPII_MEDIATED_VESICLE_TRANSPORT|REACTOME_ER_TO_GOLGI_ANTEROGRADE_TRANSPORT|REACTOME_MEMBRANE_TRAFFICKING|REACTOME_POST_TRANSLATIONAL_PROTEIN_MODIFICATION|REACTOME_RAB_GEFS_EXCHANGE_GTP_FOR_GDP_ON_RABS|REACTOME_RAB_REGULATION_OF_TRAFFICKING|REACTOME_TRANSPORT_TO_THE_GOLGI_AND_SUBSEQUENT_MODIFICATION|REACTOME_VESICLE_MEDIATED_TRANSPORT
P48962	ADP/ATP translocase 1 OS=Mus musculus OX=10090 GN=Slc25a4 PE=1 SV=4	Slc25a4	0.397718	0.19515	0.333182		0	220.457	68	35	197	23	23	298	32.9	9.72	627.48	14.8302	16.1504	15.5052	16.0035	15.8413	15.7691	16.1291	16.0563	15.5142	15.8293	REACTOME_DISEASE|REACTOME_HIV_INFECTION|REACTOME_HOST_INTERACTIONS_OF_HIV_FACTORS|REACTOME_INFECTIOUS_DISEASE|REACTOME_INFLUENZA_INFECTION|REACTOME_INTERACTIONS_OF_VPR_WITH_HOST_CELLULAR_PROTEINS|REACTOME_MITOCHONDRIAL_PROTEIN_IMPORT|REACTOME_PROTEIN_LOCALIZATION|REACTOME_SLC_MEDIATED_TRANSMEMBRANE_TRANSPORT|REACTOME_TRANSPORT_OF_NUCLEOSIDES_AND_FREE_PURINE_AND_PYRIMIDINE_BASES_ACROSS_THE_PLASMA_…
O35435	Dihydroorotate dehydrogenase (quinone), mitochondrial OS=Mus musculus OX=10090 GN=Dhodh PE=1 SV=2	Dhodh	0.397607	0.0483403	0.143036		0	20.015	15	5	5	1	5	395	42.7	9.55	15.9	9.48754	10.164	9.68927	10.2753	10.3395	10.2794	10.081	10.2766	9.70424	10.2942	REACTOME_METABOLISM_OF_NUCLEOTIDES|REACTOME_NUCLEOBASE_BIOSYNTHESIS
A0A0R4J140	Isoform of Q5SW19, Clustered mitochondria protein homolog OS=Mus musculus OX=10090 GN=Cluh PE=1 SV=1	Cluh	0.396549	0.00939376	0.0645439		0	55.625	11	13	18	0	13	1353	151.7	6.02	63.57	11.0606	11.7891	11.296	11.62	11.4601	11.7321	11.4887	11.7788	11.2647	11.6328	NA
A0A0A6YWM5	Isoform of Q8BMG7, Rab3 GTPase-activating protein non-catalytic subunit OS=Mus musculus OX=10090 GN=Rab3gap2 PE=1 SV=1	Rab3gap2	0.396261	0.00487106	0.0501448		0	49.002	8	10	14	0	9	1367	152.4	6.18	46.36	10.6678	11.1701	10.8252	11.3634	10.6127	11.0967	10.6884	10.9576	10.7844	10.9719	REACTOME_COPI_INDEPENDENT_GOLGI_TO_ER_RETROGRADE_TRAFFIC|REACTOME_GOLGI_TO_ER_RETROGRADE_TRANSPORT|REACTOME_INTRA_GOLGI_AND_RETROGRADE_GOLGI_TO_ER_TRAFFIC|REACTOME_MEMBRANE_TRAFFICKING|REACTOME_RAB_GEFS_EXCHANGE_GTP_FOR_GDP_ON_RABS|REACTOME_RAB_REGULATION_OF_TRAFFICKING|REACTOME_VESICLE_MEDIATED_TRANSPORT
Q14CH7	Alanine--tRNA ligase, mitochondrial OS=Mus musculus OX=10090 GN=Aars2 PE=1 SV=1	Aars2	0.394717	0.00503661	0.0508741		0.004	3.09	1	1	1	1	1	980	106.7	6.18	2.66	6.86881	7.05963	6.64151	7.0344	6.86729	7.20299	6.83376	7.26148	6.41414	7.04059	REACTOME_CYTOSOLIC_TRNA_AMINOACYLATION|REACTOME_MITOCHONDRIAL_TRNA_AMINOACYLATION|REACTOME_TRANSLATION|REACTOME_TRNA_AMINOACYLATION
Q8JZM0	Dimethyladenosine transferase 1, mitochondrial OS=Mus musculus OX=10090 GN=Tfb1m PE=1 SV=1	Tfb1m	0.393754	0.0635255	0.167652		0.001	5.062	6	1	2	1	1	345	38.9	9.47	0	7.93804	8.63732	8.20416	8.69733	8.81605	8.74584	8.65886	8.80117	8.26073	8.96494	REACTOME_METABOLISM_OF_RNA|REACTOME_MITOCHONDRIAL_BIOGENESIS|REACTOME_ORGANELLE_BIOGENESIS_AND_MAINTENANCE|REACTOME_RRNA_MODIFICATION_IN_THE_MITOCHONDRION|REACTOME_RRNA_PROCESSING|REACTOME_RRNA_PROCESSING_IN_THE_MITOCHONDRION|REACTOME_TRANSCRIPTIONAL_ACTIVATION_OF_MITOCHONDRIAL_BIOGENESIS
Q00493	Carboxypeptidase E OS=Mus musculus OX=10090 GN=Cpe PE=1 SV=2	Cpe	0.393337	0.00880113	0.0625823		0	29.442	17	7	7	7	7	476	53.2	5.19	25.64	9.51149	10.1073	9.64992	9.97376	9.85916	10.0029	9.85435	10.2042	9.68399	10.2375	REACTOME_INSULIN_PROCESSING|REACTOME_PEPTIDE_HORMONE_METABOLISM
Q8CI43	Myosin light chain 6B OS=Mus musculus OX=10090 GN=Myl6b PE=1 SV=1	Myl6b	0.392673	0.0409131	0.130855		0	65.426	62	14	27	13	13	207	22.7	5.53	82.27	12.2113	12.7287	12.3454	12.7352	11.9111	12.5819	12.129	12.6177	12.2207	12.1173	REACTOME_DEVELOPMENTAL_BIOLOGY|REACTOME_EPH_EPHRIN_SIGNALING|REACTOME_EPHA_MEDIATED_GROWTH_CONE_COLLAPSE|REACTOME_MUSCLE_CONTRACTION|REACTOME_NERVOUS_SYSTEM_DEVELOPMENT|REACTOME_RHO_GTPASE_EFFECTORS|REACTOME_RHO_GTPASES_ACTIVATE_CIT|REACTOME_RHO_GTPASES_ACTIVATE_PAKS|REACTOME_RHO_GTPASES_ACTIVATE_PKNS|REACTOME_RHO_GTPASES_ACTIVATE_ROCKS|REACTOME_SEMA4D_IN_SEMAPHORIN_SIGNALING|REACTOME_SEMA4D_INDU…
Q8BHG1	Nardilysin OS=Mus musculus OX=10090 GN=Nrdc PE=1 SV=1	Nrdc	0.392186	0.0146477	0.0782164		0	65.1	12	12	18	0	12	1161	132.8	4.87	62.32	11.6679	12.3221	11.8184	11.998	11.5312	12.0893	11.7241	12.1007	11.746	11.9384	NA
Q6GQT9	Nodal modulator 1 OS=Mus musculus OX=10090 GN=Nomo1 PE=1 SV=1	Nomo1	0.391921	0.016519	0.083382		0	87.649	20	19	28	18	19	1214	133.3	6.09	97.34	11.7988	12.5548	12.0703	12.3067	12.0915	12.4588	12.1248	12.526	12.0788	12.2776	NA
Q6PIE5	Sodium/potassium-transporting ATPase subunit alpha-2 OS=Mus musculus OX=10090 GN=Atp1a2 PE=1 SV=1	Atp1a2	0.391673	0.133109	0.25918		0	371.9	52	55	181	2	39	1020	112.1	5.55	607.65	14.539	15.7268	15.0776	15.499	15.3102	15.3923	15.5446	15.6386	15.3211	15.4941	REACTOME_CARDIAC_CONDUCTION|REACTOME_DISEASE|REACTOME_INFECTIOUS_DISEASE|REACTOME_ION_CHANNEL_TRANSPORT|REACTOME_ION_HOMEOSTASIS|REACTOME_ION_TRANSPORT_BY_P_TYPE_ATPASES|REACTOME_MUSCLE_CONTRACTION|REACTOME_POTENTIAL_THERAPEUTICS_FOR_SARS|REACTOME_SARS_COV_INFECTIONS|REACTOME_TRANSPORT_OF_SMALL_MOLECULES
O09165	Calsequestrin-1 OS=Mus musculus OX=10090 GN=Casq1 PE=1 SV=3	Casq1	0.390929	0.19006	0.32752		0	265.888	50	21	429	10	21	405	46.3	4.12	1534.03	15.7011	16.9798	16.2663	16.8604	16.4034	16.4778	16.7893	16.809	16.6114	16.5992	REACTOME_CARDIAC_CONDUCTION|REACTOME_ION_CHANNEL_TRANSPORT|REACTOME_ION_HOMEOSTASIS|REACTOME_MUSCLE_CONTRACTION|REACTOME_STIMULI_SENSING_CHANNELS|REACTOME_TRANSPORT_OF_SMALL_MOLECULES
Q9CPY7	Cytosol aminopeptidase OS=Mus musculus OX=10090 GN=Lap3 PE=1 SV=3	Lap3	0.390862	0.0104279	0.0672811		0	115.359	39	16	44	0	16	519	56.1	7.72	152.1	12.5184	13.2033	12.6903	13.0404	12.6021	13.0503	12.7786	13.0777	12.7139	12.8859	NA
Q8VCA8	Secernin-2 OS=Mus musculus OX=10090 GN=Scrn2 PE=1 SV=1	Scrn2	0.3908	0.0633222	0.16719		0	52.895	27	6	12	3	6	425	46.6	5.71	58.5	8.73417	9.47916	8.96304	9.6256	9.35771	9.41518	9.28642	9.28946	9.07628	9.56222	NA
Q8K4T3	STE20-related kinase adapter protein beta OS=Mus musculus OX=10090 GN=Stradb PE=2 SV=1	Stradb	0.390722	0.0104028	0.0672811		0	11.443	9	4	4	1	4	418	46.8	6.9	10.67	8.35428	8.8436	8.27358	8.66646	8.69592	8.89502	8.61736	8.83353	8.2419	8.89805	REACTOME_ENERGY_DEPENDENT_REGULATION_OF_MTOR_BY_LKB1_AMPK|REACTOME_MTOR_SIGNALLING
P23116	Eukaryotic translation initiation factor 3 subunit A OS=Mus musculus OX=10090 GN=Eif3a PE=1 SV=5	Eif3a	0.390606	0.0275939	0.105758		0	175.629	30	36	72	35	36	1344	161.8	6.77	224.77	13.6564	14.4464	13.8986	14.2154	13.6877	14.1342	13.9432	14.2551	13.9094	13.9973	REACTOME_ACTIVATION_OF_THE_MRNA_UPON_BINDING_OF_THE_CAP_BINDING_COMPLEX_AND_EIFS_AND_SUBSEQUENT_BINDING_TO_43S|REACTOME_EUKARYOTIC_TRANSLATION_INITIATION|REACTOME_TRANSLATION
A0A5F8MPD6	Isoform of Q9CS72, Filamin-A-interacting protein 1 OS=Mus musculus OX=10090 GN=Filip1 PE=1 SV=1	Filip1	0.390414	0.00852784	0.0618064		0	57.96	15	13	18	1	1	1178	134.5	7.71	43.94	10.1113	10.761	10.3059	10.5773	10.4243	10.6098	10.4909	10.86	10.3356	10.812	NA
Q9CR06	Isoform of Q8BSY0, Aspartyl/asparaginyl beta-hydroxylase OS=Mus musculus OX=10090 GN=Asph PE=1 SV=1	Asph	0.390379	0.193633	0.330975		0	48.649	32	7	54	0	6	207	22.7	9.77	151.84	13.548	14.8281	14.079	14.5939	14.1547	14.4479	14.4206	14.4367	14.3022	14.1497	REACTOME_CARDIAC_CONDUCTION|REACTOME_ION_CHANNEL_TRANSPORT|REACTOME_ION_HOMEOSTASIS|REACTOME_MUSCLE_CONTRACTION|REACTOME_STIMULI_SENSING_CHANNELS|REACTOME_TRANSPORT_OF_SMALL_MOLECULES
Q9D4H8	Cullin-2 OS=Mus musculus OX=10090 GN=Cul2 PE=1 SV=2	Cul2	0.389489	0.01534	0.0805723		0	103.717	28	18	34	2	18	745	86.8	7.01	106.82	11.8195	12.5798	12.106	12.4848	12.2299	12.5002	12.3244	12.5537	12.0932	12.4018	REACTOME_ADAPTIVE_IMMUNE_SYSTEM|REACTOME_ANTIGEN_PROCESSING_UBIQUITINATION_PROTEASOME_DEGRADATION|REACTOME_CELLULAR_RESPONSE_TO_HYPOXIA|REACTOME_CELLULAR_RESPONSES_TO_EXTERNAL_STIMULI|REACTOME_CLASS_I_MHC_MEDIATED_ANTIGEN_PROCESSING_PRESENTATION|REACTOME_DEVELOPMENTAL_BIOLOGY|REACTOME_NEDDYLATION|REACTOME_NERVOUS_SYSTEM_DEVELOPMENT|REACTOME_POST_TRANSLATIONAL_PROTEIN_MODIFICATION|REACTOME_REGULAT…
A3KG59	Xaa-Arg dipeptidase OS=Mus musculus OX=10090 GN=Pm20d2 PE=1 SV=1	Pm20d2	0.38909	0.00728685	0.0587712		0	11.256	8	3	4	0	3	431	46.5	5.25	11.58	8.6204	9.14807	8.71725	9.27269	9.07201	9.1944	9.03177	9.38581	8.7595	9.14539	NA
A0A0A0MQ68	Isoform of Q60759, Glutaryl-CoA dehydrogenase, mitochondrial OS=Mus musculus OX=10090 GN=Gcdh PE=1 SV=1	Gcdh	0.387824	0.0565526	0.157133		0	79.188	33	11	24	0	11	447	49.5	8.72	85.89	11.0718	11.9561	11.4082	11.8485	11.7801	11.9162	11.9185	11.9716	11.4266	11.852	REACTOME_LYSINE_CATABOLISM|REACTOME_METABOLISM_OF_AMINO_ACIDS_AND_DERIVATIVES
Q78JE5	F-box only protein 22 OS=Mus musculus OX=10090 GN=Fbxo22 PE=1 SV=2	Fbxo22	0.387258	0.00972242	0.0655072		0	18.969	11	4	4	0	4	402	44.2	7.61	14.47	9.72644	10.423	9.77858	10.0009	9.8114	10.229	10.132	10.4236	9.90364	10.2118	REACTOME_ADAPTIVE_IMMUNE_SYSTEM|REACTOME_ANTIGEN_PROCESSING_UBIQUITINATION_PROTEASOME_DEGRADATION|REACTOME_CLASS_I_MHC_MEDIATED_ANTIGEN_PROCESSING_PRESENTATION|REACTOME_NEDDYLATION|REACTOME_POST_TRANSLATIONAL_PROTEIN_MODIFICATION
B7ZNK6	Isoform of Q64191, Aga protein OS=Mus musculus OX=10090 GN=Aga PE=1 SV=1	Aga	0.386858	0.0172758	0.08539		0	12.179	12	3	3	0	3	336	35.9	5.95	9.26	8.02151	8.55581	8.14288	8.4892	8.50634	8.57816	8.2801	8.61183	8.0541	8.70422	REACTOME_INNATE_IMMUNE_SYSTEM|REACTOME_NEUTROPHIL_DEGRANULATION
P63242	Eukaryotic translation initiation factor 5A-1 OS=Mus musculus OX=10090 GN=Eif5a PE=1 SV=2	Eif5a	0.386553	0.0111719	0.0688363		0	90.082	69	12	42	0	12	154	16.8	5.24	154.06	12.9087	13.6252	13.0936	13.4997	13.1405	13.3951	13.2215	13.5018	13.0333	13.3086	REACTOME_GAMMA_CARBOXYLATION_HYPUSINE_FORMATION_AND_ARYLSULFATASE_ACTIVATION|REACTOME_POST_TRANSLATIONAL_PROTEIN_MODIFICATION
D3Z041	Isoform of P41216, Arachidonate--CoA ligase OS=Mus musculus OX=10090 GN=Acsl1 PE=1 SV=1	Acsl1	0.386138	0.0686534	0.174708		0	220.487	53	36	90	0	35	699	78	7.47	309.06	14.1741	15.1705	14.7755	14.9684	14.9905	15.1572	14.9407	15.2977	14.6564	14.874	REACTOME_ALPHA_LINOLENIC_OMEGA3_AND_LINOLEIC_OMEGA6_ACID_METABOLISM|REACTOME_FATTY_ACID_METABOLISM|REACTOME_FATTY_ACYL_COA_BIOSYNTHESIS|REACTOME_LINOLEIC_ACID_LA_METABOLISM|REACTOME_METABOLISM_OF_LIPIDS|REACTOME_REGULATION_OF_LIPID_METABOLISM_BY_PPARALPHA|REACTOME_SYNTHESIS_OF_VERY_LONG_CHAIN_FATTY_ACYL_COAS
Q3UX10	Tubulin alpha chain-like 3 OS=Mus musculus OX=10090 GN=Tubal3 PE=2 SV=2	Tubal3	0.386061	0.0835912	0.195786		0	25.593	10	5	13	1	1	446	50	5.58	31.93	6.00773	6.97398	6.3852	6.63579	6.20813	6.67304	6.34954	6.65923	6.57209	6.51096	REACTOME_ACTIVATION_OF_AMPK_DOWNSTREAM_OF_NMDARS|REACTOME_ACTIVATION_OF_NMDA_RECEPTORS_AND_POSTSYNAPTIC_EVENTS|REACTOME_ADAPTIVE_IMMUNE_SYSTEM|REACTOME_AGGREPHAGY|REACTOME_ANCHORING_OF_THE_BASAL_BODY_TO_THE_PLASMA_MEMBRANE|REACTOME_ASPARAGINE_N_LINKED_GLYCOSYLATION|REACTOME_ASSEMBLY_AND_CELL_SURFACE_PRESENTATION_OF_NMDA_RECEPTORS|REACTOME_AURKA_ACTIVATION_BY_TPX2|REACTOME_AUTOPHAGY|REACTOME_CARBO…
Q61781	Keratin, type I cytoskeletal 14 OS=Mus musculus OX=10090 GN=Krt14 PE=1 SV=2	Krt14	0.386026	0.205647	0.345119		0	14.4	11	6	8	0	2	484	52.8	5.17	21.47	8.19511	9.44802	8.59497	9.2245	8.37315	8.24024	8.56223	8.4901	10.2881	10.5409	REACTOME_CELL_CELL_COMMUNICATION|REACTOME_CELL_JUNCTION_ORGANIZATION|REACTOME_DEVELOPMENTAL_BIOLOGY|REACTOME_FORMATION_OF_THE_CORNIFIED_ENVELOPE|REACTOME_KERATINIZATION|REACTOME_TYPE_I_HEMIDESMOSOME_ASSEMBLY
Q8QZY1	Eukaryotic translation initiation factor 3 subunit L OS=Mus musculus OX=10090 GN=Eif3l PE=1 SV=1	Eif3l	0.385887	0.0171169	0.0849945		0	72.587	27	14	27	13	14	564	66.6	6.44	87.4	12.2128	12.9411	12.4315	12.6435	12.3015	12.7452	12.4867	12.8503	12.4726	12.6544	REACTOME_ACTIVATION_OF_THE_MRNA_UPON_BINDING_OF_THE_CAP_BINDING_COMPLEX_AND_EIFS_AND_SUBSEQUENT_BINDING_TO_43S|REACTOME_EUKARYOTIC_TRANSLATION_INITIATION|REACTOME_TRANSLATION
P68181	cAMP-dependent protein kinase catalytic subunit beta OS=Mus musculus OX=10090 GN=Prkacb PE=1 SV=2	Prkacb	0.385577	0.0058002	0.0543947		0	74.25	38	14	30	1	6	351	40.7	8.56	100.44	10.6389	11.1704	10.6724	11.1209	10.9828	11.1147	10.8624	11.1916	10.6915	11.1783	REACTOME_ACTIVATION_OF_NMDA_RECEPTORS_AND_POSTSYNAPTIC_EVENTS|REACTOME_ADAPTIVE_IMMUNE_SYSTEM|REACTOME_ADORA2B_MEDIATED_ANTI_INFLAMMATORY_CYTOKINES_PRODUCTION|REACTOME_ANCHORING_OF_THE_BASAL_BODY_TO_THE_PLASMA_MEMBRANE|REACTOME_ANTI_INFLAMMATORY_RESPONSE_FAVOURING_LEISHMANIA_PARASITE_INFECTION|REACTOME_AQUAPORIN_MEDIATED_TRANSPORT|REACTOME_AURKA_ACTIVATION_BY_TPX2|REACTOME_C_TYPE_LECTIN_RECEPTORS…
Q9D646	Keratin, type I cuticular Ha4 OS=Mus musculus OX=10090 GN=Krt34 PE=2 SV=1	Krt34	0.38414	0.661012	0.764281		0	31.08	20	7	9	1	1	392	44.5	4.79	29.93	6.53411	6.21642	5.77444	7.91727	5.14487	5.48316	6.88187	4.62687	5.28564	7.29789	REACTOME_DEVELOPMENTAL_BIOLOGY|REACTOME_FORMATION_OF_THE_CORNIFIED_ENVELOPE|REACTOME_KERATINIZATION
D3Z632	Isoform of Q64362, AKT-interacting protein OS=Mus musculus OX=10090 GN=Aktip PE=1 SV=2	Aktip	0.383867	0.0144898	0.0778368		0.001	6.582	10	2	2	0	2	258	29.2	9.31	7.18	7.81223	8.21248	8.00747	8.36664	8.20786	8.45455	8.24845	8.43817	7.79738	8.5209	NA
G3X9Y5	Isoform of E9Q735, Ubiquitin conjugation factor E4 A OS=Mus musculus OX=10090 GN=Ube4a PE=1 SV=1	Ube4a	0.383784	0.0050275	0.050869		0	29.378	8	7	8	0	7	1085	124.4	5.19	27.31	9.66673	10.3023	9.86954	10.246	10.0681	10.3153	10.1524	10.4257	9.9214	10.3078	REACTOME_ADAPTIVE_IMMUNE_SYSTEM|REACTOME_ANTIGEN_PROCESSING_UBIQUITINATION_PROTEASOME_DEGRADATION|REACTOME_CLASS_I_MHC_MEDIATED_ANTIGEN_PROCESSING_PRESENTATION
A0A0X1KG67	Isoform of Q3TAS6, ER membrane protein complex subunit 10 OS=Mus musculus OX=10090 GN=Emc10 PE=1 SV=1	Emc10	0.383668	0.0100983	0.0663684		0.001	8.667	9	2	2	0	2	268	28.2	6.55	5.76	7.03299	7.15361	6.93223	7.48833	7.23967	7.50192	7.04886	7.49657	6.94752	7.47917	NA
Q60682	Killer cell lectin-like receptor 8 OS=Mus musculus OX=10090 GN=Klra8 PE=1 SV=1	Klra8	0.382831	0.085032	0.197273		0.03	1.465	3	1	2	0	1	266	31.4	8.79	3.92	7.90328	8.52416	8.07676	8.69886	8.55774	8.46696	8.65719	8.70132	8.12683	8.84466	NA
Q9CX98	Cytochrome P450 2U1 OS=Mus musculus OX=10090 GN=Cyp2u1 PE=2 SV=2	Cyp2u1	0.382785	0.01426	0.0771013		0	17.111	9	4	4	1	4	530	60.5	8.27	13.73	8.73535	9.27491	9.01659	9.38905	9.28408	9.42305	9.20507	9.43496	8.92984	9.56291	REACTOME_ARACHIDONIC_ACID_METABOLISM|REACTOME_BIOLOGICAL_OXIDATIONS|REACTOME_CYTOCHROME_P450_ARRANGED_BY_SUBSTRATE_TYPE|REACTOME_DISEASE|REACTOME_DISEASES_OF_METABOLISM|REACTOME_FATTY_ACID_METABOLISM|REACTOME_METABOLIC_DISORDERS_OF_BIOLOGICAL_OXIDATION_ENZYMES|REACTOME_METABOLISM_OF_LIPIDS|REACTOME_MISCELLANEOUS_SUBSTRATES|REACTOME_PHASE_I_FUNCTIONALIZATION_OF_COMPOUNDS|REACTOME_SYNTHESIS_OF_16_2…
P47754	F-actin-capping protein subunit alpha-2 OS=Mus musculus OX=10090 GN=Capza2 PE=1 SV=3	Capza2	0.382275	0.098056	0.214756		0	144.99	70	15	86	3	13	286	32.9	5.85	368.89	12.8688	13.9172	13.379	13.7167	13.6444	13.6718	13.786	13.9221	13.4622	13.824	REACTOME_ADAPTIVE_IMMUNE_SYSTEM|REACTOME_ADVANCED_GLYCOSYLATION_ENDPRODUCT_RECEPTOR_SIGNALING|REACTOME_ASPARAGINE_N_LINKED_GLYCOSYLATION|REACTOME_CELLULAR_RESPONSES_TO_EXTERNAL_STIMULI|REACTOME_COPI_INDEPENDENT_GOLGI_TO_ER_RETROGRADE_TRAFFIC|REACTOME_COPI_MEDIATED_ANTEROGRADE_TRANSPORT|REACTOME_CYTOKINE_SIGNALING_IN_IMMUNE_SYSTEM|REACTOME_ER_TO_GOLGI_ANTEROGRADE_TRANSPORT|REACTOME_FACTORS_INVOLVE…
P59017	Bcl-2-like protein 13 OS=Mus musculus OX=10090 GN=Bcl2l13 PE=1 SV=2	Bcl2l13	0.381565	0.00845496	0.0616794		0	29.259	21	6	7	6	6	434	46.7	4.59	23.96	9.22805	9.81601	9.43952	9.8182	9.687	9.90594	9.68674	9.88223	9.35537	9.88213	NA
E9PWK1	Isoform of Q9D379, Epoxide hydrolase OS=Mus musculus OX=10090 GN=Ephx1 PE=1 SV=1	Ephx1	0.381552	0.0131339	0.074228		0	106.766	49	19	37	0	19	441	50.9	8.15	130.63	12.5567	13.2094	12.7211	13.0634	12.4606	12.9402	12.6905	13.0117	12.6448	12.7567	REACTOME_BIOLOGICAL_OXIDATIONS|REACTOME_PHASE_I_FUNCTIONALIZATION_OF_COMPOUNDS
P09542	Myosin light chain 3 OS=Mus musculus OX=10090 GN=Myl3 PE=1 SV=4	Myl3	0.381338	0.149946	0.279593		0	87.742	84	15	142	0	11	204	22.4	5.1	391.21	11.685	12.3917	12.5151	13.5565	12.3723	12.2471	13.1389	13.2224	11.9261	12.1264	REACTOME_MUSCLE_CONTRACTION|REACTOME_STRIATED_MUSCLE_CONTRACTION
Q8BZ71	SH3 and cysteine-rich domain-containing protein 3 OS=Mus musculus OX=10090 GN=Stac3 PE=1 SV=1	Stac3	0.38099	0.146815	0.275669		0	100.586	49	17	48	17	17	360	41	6.38	133.15	11.9972	12.9805	12.3746	13.0335	12.948	12.762	12.9361	12.9496	12.5793	13.0146	NA
Q9CTY5	Calcium uptake protein 3, mitochondrial OS=Mus musculus OX=10090 GN=Micu3 PE=2 SV=2	Micu3	0.380727	0.0228909	0.0976714		0	18.773	13	6	6	1	6	523	59.8	7.15	15.79	9.68906	10.3026	9.89069	10.166	10.3393	10.4282	10.2682	10.5571	9.80568	10.4426	REACTOME_MITOCHONDRIAL_CALCIUM_ION_TRANSPORT|REACTOME_PROCESSING_OF_SMDT1|REACTOME_TRANSPORT_OF_SMALL_MOLECULES
Q8VCP8	Adenylate kinase isoenzyme 6 OS=Mus musculus OX=10090 GN=Ak6 PE=1 SV=1	Ak6	0.379268	0.0220109	0.0955237		0.007	2.677	4	1	1	1	1	172	19.9	4.74	3.53	8.2185	8.77459	8.53048	8.85468	8.92217	8.98601	8.65677	8.95278	8.25516	8.91135	REACTOME_CHROMATIN_MODIFYING_ENZYMES|REACTOME_DISEASE|REACTOME_HATS_ACETYLATE_HISTONES|REACTOME_HIV_INFECTION|REACTOME_HIV_LIFE_CYCLE|REACTOME_HIV_TRANSCRIPTION_INITIATION|REACTOME_INFECTIOUS_DISEASE|REACTOME_INTERCONVERSION_OF_NUCLEOTIDE_DI_AND_TRIPHOSPHATES|REACTOME_METABOLISM_OF_NUCLEOTIDES|REACTOME_REGULATION_OF_TP53_ACTIVITY|REACTOME_REGULATION_OF_TP53_ACTIVITY_THROUGH_PHOSPHORYLATION|REACTO…
O70548	Telethonin OS=Mus musculus OX=10090 GN=Tcap PE=1 SV=1	Tcap	0.379109	0.0323362	0.115282		0	39.541	44	7	13	7	7	167	19.1	5.95	45.99	10.8558	11.5521	11.2731	11.6842	11.738	11.7437	11.5343	11.7908	11.2051	11.7308	REACTOME_MUSCLE_CONTRACTION|REACTOME_STRIATED_MUSCLE_CONTRACTION
Q6YJU1	Isoform of Q9QXC1, Fetuin-B OS=Mus musculus OX=10090 GN=Fetub PE=1 SV=1	Fetub	0.378651	0.0164991	0.083382		0	11.117	11	3	3	0	3	308	33.9	6.54	9.05	8.72049	9.27633	8.75273	8.95826	8.60731	8.71126	9.00228	9.45209	8.63117	9.2093	NA
P36916	Guanine nucleotide-binding protein-like 1 OS=Mus musculus OX=10090 GN=Gnl1 PE=1 SV=4	Gnl1	0.378381	0.00684823	0.0572711		0	26.453	13	7	9	4	7	607	68.7	5.68	31.41	10.1747	10.7911	10.3459	10.7039	10.3733	10.7641	10.8106	10.9617	10.4741	10.8496	NA
Q8R2P8	Isoform of Q99MN1, Lysine--tRNA ligase OS=Mus musculus OX=10090 GN=Kars PE=1 SV=1	Kars	0.376432	0.0290813	0.108862		0	91.261	30	18	26	0	18	624	71.2	6.43	85.24	12.62	13.2885	12.7975	13.0055	12.4597	13.04	12.7339	13.0992	12.7332	12.7932	REACTOME_CYTOSOLIC_TRNA_AMINOACYLATION|REACTOME_METABOLISM_OF_AMINO_ACIDS_AND_DERIVATIVES|REACTOME_MITOCHONDRIAL_TRNA_AMINOACYLATION|REACTOME_SELENOAMINO_ACID_METABOLISM|REACTOME_TRANSLATION|REACTOME_TRNA_AMINOACYLATION
P16045	Galectin-1 OS=Mus musculus OX=10090 GN=Lgals1 PE=1 SV=3	Lgals1	0.375595	0.0551227	0.15481		0	91.622	59	8	88	6	8	135	14.9	5.49	284.68	13.9907	14.6123	14.1586	14.2962	13.5767	14.2991	13.853	14.2654	14.1459	14.1299	REACTOME_POST_TRANSLATIONAL_PROTEIN_MODIFICATION|REACTOME_REGULATION_OF_INSULIN_LIKE_GROWTH_FACTOR_IGF_TRANSPORT_AND_UPTAKE_BY_INSULIN_LIKE_GROWTH_FACTOR_BINDING_PROTEINS_IGFBPS_
A3KGR9	Isoform of Q9D8V0, Histocompatibility 13 (Fragment) OS=Mus musculus OX=10090 GN=H13 PE=1 SV=1	H13	0.375547	0.0062198	0.0549199		0	28.054	18	5	7	0	2	347	38.2	8.4	20.64	9.63127	10.1476	9.81493	10.0168	9.64606	10.1536	9.74469	10.1917	9.8048	10.0097	NA
Q9JIF9	Myotilin OS=Mus musculus OX=10090 GN=Myot PE=1 SV=1	Myot	0.375451	0.0936926	0.209233		0	181.525	74	27	118	27	27	496	55.3	8.84	380.86	13.7806	14.8051	14.3164	14.7382	14.6608	14.8038	14.7469	14.9302	14.439	14.5436	NA
A0A0R4J094	Isoform of Q3TC72, Fumarylacetoacetate hydrolase domain-containing 2A OS=Mus musculus OX=10090 GN=Fahd2a PE=1 SV=1	Fahd2a	0.37504	0.0323859	0.115282		0	50.887	33	8	19	1	8	313	34.7	8.16	68.88	11.7406	12.5459	12.0912	12.4073	12.3564	12.4832	12.4491	12.6787	12.1237	12.521	NA
Q6P9R2	Serine/threonine-protein kinase OSR1 OS=Mus musculus OX=10090 GN=Oxsr1 PE=1 SV=1	Oxsr1	0.374321	0.0347237	0.119808		0	49.07	21	9	15	8	8	527	58.2	6.43	58.09	10.911	11.7511	11.2656	11.611	11.4178	11.6594	11.5222	11.7139	11.2124	11.4651	NA
V9GWX5	Isoform of Q99MQ5, Collagen alpha-1(XXV) chain OS=Mus musculus OX=10090 GN=Col25a1 PE=4 SV=1	Col25a1	0.37242	0.426097	0.56543		0.018	2.001	3	1	1	0	1	593	61.4	10.02	2.06	6.20142	6.49005	5.51758	7.51257	6.27896	6.40875	5.84781	5.53942	6.68808	6.44515	REACTOME_COLLAGEN_BIOSYNTHESIS_AND_MODIFYING_ENZYMES|REACTOME_COLLAGEN_CHAIN_TRIMERIZATION|REACTOME_COLLAGEN_DEGRADATION|REACTOME_COLLAGEN_FORMATION|REACTOME_DEGRADATION_OF_THE_EXTRACELLULAR_MATRIX|REACTOME_EXTRACELLULAR_MATRIX_ORGANIZATION
Q9D0G0	28S ribosomal protein S30, mitochondrial OS=Mus musculus OX=10090 GN=Mrps30 PE=1 SV=1	Mrps30	0.371868	0.0806748	0.19168		0	14.057	9	4	4	4	4	442	49.9	9.38	11.77	9.27746	10.1572	9.38792	9.89763	9.53448	9.75521	10.1071	10.0202	9.49807	9.83406	REACTOME_MITOCHONDRIAL_TRANSLATION|REACTOME_TRANSLATION
Q8VEH8	Endoplasmic reticulum lectin 1 OS=Mus musculus OX=10090 GN=Erlec1 PE=1 SV=1	Erlec1	0.371693	0.0736759	0.182285		0.001	5.843	5	2	2	1	2	483	54.9	6.25	4.96	8.34377	8.72951	8.13579	9.01436	8.75621	8.7526	8.62848	8.7433	8.57886	9.0618	REACTOME_ABC_FAMILY_PROTEINS_MEDIATED_TRANSPORT|REACTOME_ABC_TRANSPORTER_DISORDERS|REACTOME_DEFECTIVE_CFTR_CAUSES_CYSTIC_FIBROSIS|REACTOME_DISEASE|REACTOME_DISEASES_OF_SIGNAL_TRANSDUCTION_BY_GROWTH_FACTOR_RECEPTORS_AND_SECOND_MESSENGERS|REACTOME_DISORDERS_OF_TRANSMEMBRANE_TRANSPORTERS|REACTOME_HEDGEHOG_LIGAND_BIOGENESIS|REACTOME_SIGNALING_BY_HEDGEHOG|REACTOME_TRANSPORT_OF_SMALL_MOLECULES
Q9R0P3	S-formylglutathione hydrolase OS=Mus musculus OX=10090 GN=Esd PE=1 SV=1	Esd	0.370887	0.0242783	0.100112		0	67.671	44	8	39	0	8	282	31.3	7.12	158.55	11.7438	12.5145	12.0695	12.2963	12.0693	12.4488	12.1793	12.4703	12.0343	12.2208	REACTOME_BIOLOGICAL_OXIDATIONS|REACTOME_GLUTATHIONE_CONJUGATION|REACTOME_PHASE_II_CONJUGATION_OF_COMPOUNDS
E0CXP6	Isoform of E0CX23, UMAP1-MVP12-associated (UMA) domain-containing 1 OS=Mus musculus OX=10090 GN=Umad1 PE=1 SV=1	Umad1	0.370588	0.00757149	0.0599176		0.001	6.855	17	1	2	0	1	133	14.4	4.45	10.57	7.35927	7.60961	7.4634	7.85408	7.66529	7.86371	7.33604	7.72247	7.29762	7.92469	NA
Q9D9V3	Ethylmalonyl-CoA decarboxylase OS=Mus musculus OX=10090 GN=Echdc1 PE=1 SV=2	Echdc1	0.370466	0.0143568	0.0772626		0	13.026	12	3	3	0	3	322	35.4	7.01	11.14	9.2219	9.91774	9.41698	9.82387	9.60883	9.85514	9.67316	9.8571	9.25277	9.57211	NA
Q91W98	Solute carrier family 15 member 4 OS=Mus musculus OX=10090 GN=Slc15a4 PE=1 SV=1	Slc15a4	0.370435	0.0951877	0.21074		0.004	3.004	2	1	1	1	1	574	62.2	9.16	2.07	5.19081	5.27736	5.0833	5.16939	4.99595	5.28112	4.51376	5.52515	4.90574	5.2887	REACTOME_INNATE_IMMUNE_SYSTEM|REACTOME_NEUTROPHIL_DEGRANULATION|REACTOME_SLC_MEDIATED_TRANSMEMBRANE_TRANSPORT|REACTOME_TRANSPORT_OF_INORGANIC_CATIONS_ANIONS_AND_AMINO_ACIDS_OLIGOPEPTIDES|REACTOME_TRANSPORT_OF_SMALL_MOLECULES
A2AIL4	NADH dehydrogenase (ubiquinone) complex I, assembly factor 6 OS=Mus musculus OX=10090 GN=Ndufaf6 PE=1 SV=1	Ndufaf6	0.370382	0.0190098	0.0890982		0	14.114	15	3	7	3	3	333	38.3	9.44	23.37	9.5885	10.2382	9.77224	10.1911	10.1373	10.3166	10.19	10.3142	9.88997	10.3697	REACTOME_COMPLEX_I_BIOGENESIS|REACTOME_RESPIRATORY_ELECTRON_TRANSPORT|REACTOME_RESPIRATORY_ELECTRON_TRANSPORT_ATP_SYNTHESIS_BY_CHEMIOSMOTIC_COUPLING_AND_HEAT_PRODUCTION_BY_UNCOUPLING_PROTEINS_|REACTOME_THE_CITRIC_ACID_TCA_CYCLE_AND_RESPIRATORY_ELECTRON_TRANSPORT
Q9CQE2	Transmembrane protein 223 OS=Mus musculus OX=10090 GN=Tmem223 PE=2 SV=1	Tmem223	0.370242	0.0193845	0.0895903		0.001	8.11	16	3	3	3	3	199	21.8	10.67	9.54	9.6626	10.3453	9.7301	9.96335	10.1122	10.2189	9.90761	10.2916	9.79918	10.2438	NA
A2APV2-3	Isoform of A2APV2, Isoform 3 of Formin-like protein 2 OS=Mus musculus OX=10090 GN=Fmnl2 PE=1 SV=2	Fmnl2	0.37022	0.454252	0.591657		0	12.404	2	4	18	0	1	1091	123.9	7.65	49.3	8.73081	8.45031	7.88119	10.0264	9.03925	9.07887	8.15571	8.10804	8.79359	8.78802	REACTOME_RHO_GTPASE_EFFECTORS|REACTOME_RHO_GTPASES_ACTIVATE_FORMINS|REACTOME_SIGNALING_BY_RHO_GTPASES
A0A0G2JDK3	Isoform of P53612, Geranylgeranyl transferase type-2 subunit beta (Fragment) OS=Mus musculus OX=10090 GN=Rabggtb PE=1 SV=1	Rabggtb	0.369918	0.0180187	0.0868455		0.001	8.824	13	2	2	0	2	149	16.6	5.47	7.33	8.79848	9.50142	9.08039	9.32085	9.21735	9.55752	9.28013	9.42309	8.95456	9.37762	REACTOME_POST_TRANSLATIONAL_PROTEIN_MODIFICATION|REACTOME_RAB_GERANYLGERANYLATION|REACTOME_RNA_POLYMERASE_II_TRANSCRIPTION|REACTOME_TP53_REGULATES_TRANSCRIPTION_OF_CELL_DEATH_GENES|REACTOME_TP53_REGULATES_TRANSCRIPTION_OF_SEVERAL_ADDITIONAL_CELL_DEATH_GENES_WHOSE_SPECIFIC_ROLES_IN_P53_DEPENDENT_APOPTOSIS_REMAIN_UNCERTAIN|REACTOME_TRANSCRIPTIONAL_REGULATION_BY_TP53
Q91YP0	L-2-hydroxyglutarate dehydrogenase, mitochondrial OS=Mus musculus OX=10090 GN=L2hgdh PE=1 SV=1	L2hgdh	0.368484	0.0405532	0.130595		0	37.933	23	8	9	8	8	464	50.9	8.29	30.17	10.2281	10.9544	10.528	10.8446	10.8873	10.9522	10.9109	11.0758	10.4661	11.0358	REACTOME_PYRUVATE_METABOLISM_AND_CITRIC_ACID_TCA_CYCLE|REACTOME_THE_CITRIC_ACID_TCA_CYCLE_AND_RESPIRATORY_ELECTRON_TRANSPORT
P35569	Insulin receptor substrate 1 OS=Mus musculus OX=10090 GN=Irs1 PE=1 SV=1	Irs1	0.368267	0.00599764	0.0544339		0	17.741	7	5	6	0	5	1233	130.6	8.73	18.57	8.47157	8.91324	8.56817	9.16193	8.90883	9.24125	8.80239	9.08187	8.71464	8.90865	REACTOME_ACTIVATED_NTRK3_SIGNALS_THROUGH_PI3K|REACTOME_CONSTITUTIVE_SIGNALING_BY_ABERRANT_PI3K_IN_CANCER|REACTOME_CYTOKINE_SIGNALING_IN_IMMUNE_SYSTEM|REACTOME_DISEASE|REACTOME_DISEASES_OF_SIGNAL_TRANSDUCTION_BY_GROWTH_FACTOR_RECEPTORS_AND_SECOND_MESSENGERS|REACTOME_FLT3_SIGNALING|REACTOME_GROWTH_HORMONE_RECEPTOR_SIGNALING|REACTOME_INSULIN_RECEPTOR_SIGNALLING_CASCADE|REACTOME_INTERLEUKIN_7_SIGNALI…
Q8R429	Sarcoplasmic/endoplasmic reticulum calcium ATPase 1 OS=Mus musculus OX=10090 GN=Atp2a1 PE=1 SV=1	Atp2a1	0.366936	0.301665	0.445523		0	870.108	63	101	1267	58	58	994	109.4	5.22	4018.19	17.1261	18.6698	17.9089	18.2354	18.1966	17.9792	18.5176	18.4707	18.0423	18.2711	REACTOME_CARDIAC_CONDUCTION|REACTOME_HEMOSTASIS|REACTOME_ION_CHANNEL_TRANSPORT|REACTOME_ION_HOMEOSTASIS|REACTOME_ION_TRANSPORT_BY_P_TYPE_ATPASES|REACTOME_MUSCLE_CONTRACTION|REACTOME_PLATELET_CALCIUM_HOMEOSTASIS|REACTOME_PLATELET_HOMEOSTASIS|REACTOME_PRE_NOTCH_EXPRESSION_AND_PROCESSING|REACTOME_PRE_NOTCH_PROCESSING_IN_GOLGI|REACTOME_REDUCTION_OF_CYTOSOLIC_CA_LEVELS|REACTOME_SIGNALING_BY_NOTCH|REAC…
Q5SWU9	Acetyl-CoA carboxylase 1 OS=Mus musculus OX=10090 GN=Acaca PE=1 SV=1	Acaca	0.366605	0.00771252	0.0601432		0	46.555	6	10	13	0	4	2345	265.1	6.39	45.5	9.43575	10.05	9.92127	10.2923	10.1127	10.3436	10.1974	10.399	9.88649	10.3016	REACTOME_ACTIVATION_OF_GENE_EXPRESSION_BY_SREBF_SREBP_|REACTOME_BIOTIN_TRANSPORT_AND_METABOLISM|REACTOME_CARNITINE_METABOLISM|REACTOME_CHREBP_ACTIVATES_METABOLIC_GENE_EXPRESSION|REACTOME_DEFECTS_IN_BIOTIN_BTN_METABOLISM|REACTOME_DEFECTS_IN_VITAMIN_AND_COFACTOR_METABOLISM|REACTOME_DISEASE|REACTOME_DISEASES_OF_METABOLISM|REACTOME_FATTY_ACID_METABOLISM|REACTOME_FATTY_ACYL_COA_BIOSYNTHESIS|REACTOME_I…
Q62148	Retinal dehydrogenase 2 OS=Mus musculus OX=10090 GN=Aldh1a2 PE=1 SV=2	Aldh1a2	0.366174	0.0460083	0.139345		0	30.087	14	8	10	5	5	518	56.6	5.74	32.28	9.31467	9.49435	8.99524	9.27733	8.61265	9.42113	8.49098	8.96624	9.22484	9.31021	REACTOME_BIOLOGICAL_OXIDATIONS|REACTOME_ETHANOL_OXIDATION|REACTOME_FRUCTOSE_CATABOLISM|REACTOME_FRUCTOSE_METABOLISM|REACTOME_METABOLISM_OF_CARBOHYDRATES|REACTOME_NEURONAL_SYSTEM|REACTOME_NEUROTRANSMITTER_CLEARANCE|REACTOME_PHASE_I_FUNCTIONALIZATION_OF_COMPOUNDS|REACTOME_RA_BIOSYNTHESIS_PATHWAY|REACTOME_SIGNALING_BY_NUCLEAR_RECEPTORS|REACTOME_SIGNALING_BY_RETINOIC_ACID|REACTOME_TRANSMISSION_ACROSS…
Q3UGX2	Isoform of P15508, Spectrin beta chain OS=Mus musculus OX=10090 GN=Sptb PE=1 SV=1	Sptb	0.36614	0.0975768	0.214052		0	771.888	56	113	284	9	104	2329	267.9	5.49	1015.29	15.3829	16.3779	15.7299	16.0455	15.6345	15.8947	15.911	16.2099	15.7933	15.7541	REACTOME_ADAPTIVE_IMMUNE_SYSTEM|REACTOME_ASPARAGINE_N_LINKED_GLYCOSYLATION|REACTOME_CELL_CELL_COMMUNICATION|REACTOME_COPI_MEDIATED_ANTEROGRADE_TRANSPORT|REACTOME_CYTOKINE_SIGNALING_IN_IMMUNE_SYSTEM|REACTOME_DEVELOPMENTAL_BIOLOGY|REACTOME_ER_TO_GOLGI_ANTEROGRADE_TRANSPORT|REACTOME_FLT3_SIGNALING|REACTOME_INTERACTION_BETWEEN_L1_AND_ANKYRINS|REACTOME_L1CAM_INTERACTIONS|REACTOME_MAPK_FAMILY_SIGNALING…
O89051	Integral membrane protein 2B OS=Mus musculus OX=10090 GN=Itm2b PE=1 SV=1	Itm2b	0.365761	0.0517552	0.149473		0.001	4.193	11	2	2	1	2	266	30.2	5.3	4.62	8.18772	8.85722	8.33804	8.64009	8.63874	8.65761	8.63698	8.79801	8.25972	8.93707	REACTOME_AMYLOID_FIBER_FORMATION
Q9DCV4	Regulator of microtubule dynamics protein 1 OS=Mus musculus OX=10090 GN=Rmdn1 PE=1 SV=2	Rmdn1	0.365265	0.0111255	0.0688109		0	24.31	21	6	7	2	6	305	35	8.7	23.74	10.1574	10.7862	10.346	10.7197	10.7014	10.8712	10.7246	10.9438	10.2903	10.7251	NA
Q64727	Vinculin OS=Mus musculus OX=10090 GN=Vcl PE=1 SV=4	Vcl	0.365038	0.0425078	0.133612		0	341.29	55	55	136	50	55	1066	116.6	6	422.93	14.427	15.1699	14.6266	14.9216	14.48	14.9347	14.6649	15.0237	14.7083	14.682	REACTOME_CYTOKINE_SIGNALING_IN_IMMUNE_SYSTEM|REACTOME_DISEASE|REACTOME_DISEASES_OF_SIGNAL_TRANSDUCTION_BY_GROWTH_FACTOR_RECEPTORS_AND_SECOND_MESSENGERS|REACTOME_FLT3_SIGNALING|REACTOME_HEMOSTASIS|REACTOME_INNATE_IMMUNE_SYSTEM|REACTOME_MAP2K_AND_MAPK_ACTIVATION|REACTOME_MAPK_FAMILY_SIGNALING_CASCADES|REACTOME_MUSCLE_CONTRACTION|REACTOME_NEUTROPHIL_DEGRANULATION|REACTOME_ONCOGENIC_MAPK_SIGNALING|RE…
P0C5K1	Serine/threonine-protein kinase SBK2 OS=Mus musculus OX=10090 GN=Sbk2 PE=3 SV=2	Sbk2	0.364706	0.0243097	0.100135		0	19.696	17	5	8	2	5	362	39.7	5	18.84	9.62113	10.1546	9.75388	10.0939	10.0764	10.1436	9.93776	10.1735	9.62943	10.2764	NA
Q9CQM9	Glutaredoxin-3 OS=Mus musculus OX=10090 GN=Glrx3 PE=1 SV=1	Glrx3	0.364043	0.00860606	0.0619406		0	65.286	36	11	25	0	11	337	37.8	5.59	84.64	11.6416	12.3051	11.8916	12.2239	11.944	12.2282	12.0233	12.2959	11.9369	12.2045	REACTOME_IRON_UPTAKE_AND_TRANSPORT|REACTOME_TRANSPORT_OF_SMALL_MOLECULES
Q8CGB9	Isoform of Q9JHR7, Insulin-degrading enzyme OS=Mus musculus OX=10090 GN=Ide PE=1 SV=1	Ide	0.363623	0.0174723	0.0856794		0	176.398	33	28	51	1	28	1019	117.6	6.52	173.19	12.9463	13.6692	13.161	13.4853	13.2588	13.5365	13.321	13.6311	13.307	13.4902	REACTOME_DEUBIQUITINATION|REACTOME_PEROXISOMAL_PROTEIN_IMPORT|REACTOME_POST_TRANSLATIONAL_PROTEIN_MODIFICATION|REACTOME_PROTEIN_LOCALIZATION|REACTOME_UB_SPECIFIC_PROCESSING_PROTEASES
Q99KK7	Dipeptidyl peptidase 3 OS=Mus musculus OX=10090 GN=Dpp3 PE=1 SV=2	Dpp3	0.363301	0.0645384	0.168628		0	141.509	41	25	46	9	25	738	82.8	5.38	167.38	12.8303	13.6195	13.1315	13.2951	12.8848	13.4798	13.1727	13.4335	13.1445	13.1523	NA
Q6PB66	Leucine-rich PPR motif-containing protein, mitochondrial OS=Mus musculus OX=10090 GN=Lrpprc PE=1 SV=2	Lrpprc	0.363216	0.112762	0.233465		0	213.357	34	43	76	39	42	1392	156.5	6.83	259.31	13.5374	14.5592	14.0012	14.312	14.3274	14.3149	14.4391	14.5479	13.9957	14.3829	REACTOME_RESPIRATORY_ELECTRON_TRANSPORT|REACTOME_RESPIRATORY_ELECTRON_TRANSPORT_ATP_SYNTHESIS_BY_CHEMIOSMOTIC_COUPLING_AND_HEAT_PRODUCTION_BY_UNCOUPLING_PROTEINS_|REACTOME_RNA_POLYMERASE_II_TRANSCRIPTION|REACTOME_THE_CITRIC_ACID_TCA_CYCLE_AND_RESPIRATORY_ELECTRON_TRANSPORT|REACTOME_TP53_REGULATES_METABOLIC_GENES|REACTOME_TRANSCRIPTIONAL_REGULATION_BY_TP53
Q8CGY8	UDP-N-acetylglucosamine--peptide N-acetylglucosaminyltransferase 110 kDa subunit OS=Mus musculus OX=10090 GN=Ogt PE=1 SV=2	Ogt	0.363004	0.0136893	0.0757228		0	64.995	17	14	19	1	14	1046	116.9	6.7	68.87	11.3366	12.0264	11.6445	11.8187	11.5267	11.8416	11.6663	11.967	11.5055	11.841	REACTOME_CHROMATIN_MODIFYING_ENZYMES|REACTOME_DEUBIQUITINATION|REACTOME_HATS_ACETYLATE_HISTONES|REACTOME_POST_TRANSLATIONAL_PROTEIN_MODIFICATION|REACTOME_UCH_PROTEINASES
Q9DAK9	14 kDa phosphohistidine phosphatase OS=Mus musculus OX=10090 GN=Phpt1 PE=1 SV=1	Phpt1	0.362177	0.0621746	0.165565		0	52.718	48	7	37	7	7	124	14	5.53	108.12	12.4024	13.3093	12.8663	13.2269	13.0229	13.1855	13.1374	13.2927	12.8651	13.0906	NA
O35459	Delta(3,5)-Delta(2,4)-dienoyl-CoA isomerase, mitochondrial OS=Mus musculus OX=10090 GN=Ech1 PE=1 SV=1	Ech1	0.361604	0.0301988	0.111181		0	50.698	39	10	15	5	10	327	36.1	7.71	51.96	10.7419	11.4192	10.9865	11.4052	11.4374	11.5021	11.3814	11.5508	10.8152	11.2931	REACTOME_PEROXISOMAL_PROTEIN_IMPORT|REACTOME_PROTEIN_LOCALIZATION
A0A0G2JEM4	Isoform of O54965, RING-type E3 ubiquitin transferase (Fragment) OS=Mus musculus OX=10090 GN=Rnf13 PE=1 SV=1	Rnf13	0.361357	0.0110145	0.0685948		0.001	6.028	18	1	3	0	1	131	14.2	4.81	2.64	7.06697	7.64824	7.18681	7.40665	7.4733	7.62806	7.22115	7.57245	7.13633	7.63596	NA
E9Q6L0	Isoform of Q80TV8, CLIP-associating protein 1 OS=Mus musculus OX=10090 GN=Clasp1 PE=1 SV=2	Clasp1	0.361244	0.0118608	0.0709367		0	61.077	12	14	17	0	13	1452	160.1	8.68	55.35	11.3048	11.9727	11.512	11.7984	11.4713	11.8651	11.5868	11.8282	11.5179	11.7345	REACTOME_ANCHORING_OF_THE_BASAL_BODY_TO_THE_PLASMA_MEMBRANE|REACTOME_AURKA_ACTIVATION_BY_TPX2|REACTOME_CELL_CYCLE|REACTOME_CELL_CYCLE_CHECKPOINTS|REACTOME_CELL_CYCLE_MITOTIC|REACTOME_CILIUM_ASSEMBLY|REACTOME_DEVELOPMENTAL_BIOLOGY|REACTOME_M_PHASE|REACTOME_MITOTIC_G2_G2_M_PHASES|REACTOME_MITOTIC_METAPHASE_AND_ANAPHASE|REACTOME_MITOTIC_PROMETAPHASE|REACTOME_MITOTIC_SPINDLE_CHECKPOINT|REACTOME_NERVO…
Q923X4	Glutaredoxin-2, mitochondrial OS=Mus musculus OX=10090 GN=Glrx2 PE=1 SV=1	Glrx2	0.360408	0.104717	0.223233		0	22.968	32	4	6	0	4	156	17.3	9.95	21.57	9.96868	10.7353	10.2245	10.8651	10.5905	10.505	10.7495	10.7417	10.239	10.727	NA
[truncated: 4,923 more rows]
