# Supplementary material for: Proteome-wide systems genetics identifies UFMylation as a regulator of skeletal muscle function
Source: eLife. 2022 Dec 6;11:e82951. doi: 10.7554/eLife.82951 (PMC9833826; doi:10.7554/eLife.82951)
Supplement: Supplementary file 7. — Related to Figure 4. [file elife-82951-supp7.xlsx]

## Sheet: Sheet1
Human skeletal micro-muscle screen
GeneName_EntrezID_spashID	GeneName_EntrezID_spashID
scramble	scramble_A_upper	CACC	G	GATCGAATGTGTACTTCGA	TAGTGAAGCCACAGATGTA	TCGAAGTACACATTCGATC
Scramble	Scramble_A_lower		C	CTAGCTTACACATGAAGCT	ATCACTTCGGTGTCTACAT	AGCTTCATGTGTAAGCTAG	AAAA
EPHX1_2052_1239_v2	EPHX1_2052_1239_v2_A_upper	CACC	G	TGGGTGAGGTTCAAGTACCCAA	TAGTGAAGCCACAGATGTA	TTGGGTACTTGAACCTCACCCA
EPHX1_2052_1239_v2	EPHX1_2052_1239_v2_A_lower		C	ACCCACTCCAAGTTCATGGGTT	ATCACTTCGGTGTCTACAT	AACCCATGAACTTGGAGTGGGT	AAAA
EPHX1_2052_966	EPHX1_2052_966_upper	CACC	G	TGGCTGCCTATATTCTAGAGAA	TAGTGAAGCCACAGATGTA	TTCTCTAGAATATAGGCAGCCA
EPHX1_2052_966	EPHX1_2052_966_lower		C	ACCGACGGATATAAGATCTCTT	ATCACTTCGGTGTCTACAT	AAGAGATCTTATATCCGTCGGT	AAAA
EPHX1_2052_652	EPHX1_2052_652_upper	CACC	G	CTTCCAGGAATTCTACATTCAA	TAGTGAAGCCACAGATGTA	TTGAATGTAGAATTCCTGGAAG
EPHX1_2052_652	EPHX1_2052_652_lower		C	GAAGGTCCTTAAGATGTAAGTT	ATCACTTCGGTGTCTACAT	AACTTACATCTTAAGGACCTTC	AAAA
MPZ_4359_1120_v2	MPZ_4359_1120_v2_upper	CACC	G	TTGAGATGTAAGTTTCATTCCA	TAGTGAAGCCACAGATGTA	TGGAATGAAACTTACATCTCAA
MPZ_4359_1120_v2	MPZ_4359_1120_v2_lower		C	AACTCTACATTCAAAGTAAGGT	ATCACTTCGGTGTCTACAT	ACCTTACTTTGAATGTAGAGTT	AAAA
MPZ_4359_1916	MPZ_4359_1916_upper	CACC	G	ATGTCCTTAAATGTTTAATAAA	TAGTGAAGCCACAGATGTA	TTTATTAAACATTTAAGGACAT
MPZ_4359_1916	MPZ_4359_1916_lower		C	TACAGGAATTTACAAATTATTT	ATCACTTCGGTGTCTACAT	AAATAATTTGTAAATTCCTGTA	AAAA
MPZ_4359_393_v2	MPZ_4359_393_v2_upper	CACC	G	ATGGCTCCATTGTCATACACAA	TAGTGAAGCCACAGATGTA	TTGTGTATGACAATGGAGCCAT
MPZ_4359_393_v2	MPZ_4359_393_v2_lower		C	TACCGAGGTAACAGTATGTGTT	ATCACTTCGGTGTCTACAT	AACACATACTGTTACCTCGGTA	AAAA
NIT1_4817_594	NIT1_4817_594_upper	CACC	G	CTGGAGCAGAGATACTTACCTA	TAGTGAAGCCACAGATGTA	TAGGTAAGTATCTCTGCTCCAG
NIT1_4817_594	NIT1_4817_594_lower		C	GACCTCGTCTCTATGAATGGAT	ATCACTTCGGTGTCTACAT	ATCCATTCATAGAGACGAGGTC	AAAA
NIT1_4817_616_v2	NIT1_4817_616_v2_upper	CACC	G	CTGGAGCAGAGATACTTACCTA	TAGTGAAGCCACAGATGTA	TAGGTAAGTATCTCTGCTCCAG
NIT1_4817_616_v2	NIT1_4817_616_v2_lower		C	GACCTCGTCTCTATGAATGGAT	ATCACTTCGGTGTCTACAT	ATCCATTCATAGAGACGAGGTC	AAAA
NIT1_4817_137_v2	NIT1_4817_137_v2_upper	CACC	G	AGACAAGCAACAGAACTTTAAA	TAGTGAAGCCACAGATGTA	TTTAAAGTTCTGTTGCTTGTCT
NIT1_4817_137_v2	NIT1_4817_137_v2_lower		C	TCTGTTCGTTGTCTTGAAATTT	ATCACTTCGGTGTCTACAT	AAATTTCAAGACAACGAACAGA	AAAA
PCP4L1_654790_406_v2	PCP4L1_654790_406_v2_A_upper	CACC	G	AGGGCAAGTTCCGGCGATTTCA	TAGTGAAGCCACAGATGTA	TGAAATCGCCGGAACTTGCCCT
PCP4L1_654790_406_v2	PCP4L1_654790_406_v2_A_lower		C	TCCCGTTCAAGGCCGCTAAAGT	ATCACTTCGGTGTCTACAT	ACTTTAGCGGCCTTGAACGGGA	AAAA
PCP4L1_654790_344_v2	PCP4L1_654790_344_v2_upper	CACC	G	GGAGGAGGAGATTGACATTGAT	TAGTGAAGCCACAGATGTA	ATCAATGTCAATCTCCTCCTCC
PCP4L1_654790_344_v2	PCP4L1_654790_344_v2_lower		C	CCTCCTCCTCTAACTGTAACTA	ATCACTTCGGTGTCTACAT	TAGTTACAGTTAGAGGAGGAGG	AAAA
PCP4L1_654790_367_v2	PCP4L1_654790_367_v2_upper	CACC	G	TGACAGCACCAGAAACAGAGAA	TAGTGAAGCCACAGATGTA	TTCTCTGTTTCTGGTGCTGTCA
PCP4L1_654790_367_v2	PCP4L1_654790_367_v2_lower		C	ACTGTCGTGGTCTTTGTCTCTT	ATCACTTCGGTGTCTACAT	AAGAGACAAAGACCACGACAGT	AAAA
TIPRL_261726_628	TIPRL_261726_628_upper	CACC	G	AACAGATCATATAGATACAGAA	TAGTGAAGCCACAGATGTA	TTCTGTATCTATATGATCTGTT
TIPRL_261726_628	TIPRL_261726_628_lower		C	TTGTCTAGTATATCTATGTCTT	ATCACTTCGGTGTCTACAT	AAGACATAGATATACTAGACAA	AAAA
TIPRL_261726_621	TIPRL_261726_621_upper	CACC	G	TACCTACAACAGATCATATAGA	TAGTGAAGCCACAGATGTA	TCTATATGATCTGTTGTAGGTA
TIPRL_261726_621	TIPRL_261726_621_lower		C	ATGGATGTTGTCTAGTATATCT	ATCACTTCGGTGTCTACAT	AGATATACTAGACAACATCCAT	AAAA
TIPRL_261726_441_v2	TIPRL_261726_441_v2_upper	CACC	G	ACAGATGCGTTAAGATGTGTAA	TAGTGAAGCCACAGATGTA	TTACACATCTTAACGCATCTGT
TIPRL_261726_441_v2	TIPRL_261726_441_v2_lower		C	TGTCTACGCAATTCTACACATT	ATCACTTCGGTGTCTACAT	AATGTGTAGAATTGCGTAGACA	AAAA
UFC1_51506_859	UFC1_51506_859_upper	CACC	G	CTCCACCTCTAGTTGTTACTAA	TAGTGAAGCCACAGATGTA	TTAGTAACAACTAGAGGTGGAG
UFC1_51506_859	UFC1_51506_859_lower		C	GAGGTGGAGATCAACAATGATT	ATCACTTCGGTGTCTACAT	AATCATTGTTGATCTCCACCTC	AAAA
UFC1_51506_729	UFC1_51506_729_upper	CACC	G	TCCAACACAAAGAGAAATGCAA	TAGTGAAGCCACAGATGTA	TTGCATTTCTCTTTGTGTTGGA
UFC1_51506_729	UFC1_51506_729_lower		C	AGGTTGTGTTTCTCTTTACGTT	ATCACTTCGGTGTCTACAT	AACGTAAAGAGAAACACAACCT	AAAA
UFC1_51506_56	UFC1_51506_56_upper	CACC	G	GACGGAGTAATCTGTTTACATT	TAGTGAAGCCACAGATGTA	AATGTAAACAGATTACTCCGTC
UFC1_51506_56	UFC1_51506_56_lower		C	CTGCCTCATTAGACAAATGTAA	ATCACTTCGGTGTCTACAT	TTACATTTGTCTAATGAGGCAG	AAAA
OCIAD1_54940_1025	OCIAD1_54940_1025_upper	CACC	G	TTCTGTATTATCTTAATGTTTA	TAGTGAAGCCACAGATGTA	TAAACATTAAGATAATACAGAA
OCIAD1_54940_1025	OCIAD1_54940_1025_lower		C	AAGACATAATAGAATTACAAAT	ATCACTTCGGTGTCTACAT	ATTTGTAATTCTATTATGTCTT	AAAA
OCIAD1_54940_159	OCIAD1_54940_159_upper	CACC	G	CAACAAGTATGTTGATTACTCA	TAGTGAAGCCACAGATGTA	TGAGTAATCAACATACTTGTTG
OCIAD1_54940_159	OCIAD1_54940_159_lower		C	GTTGTTCATACAACTAATGAGT	ATCACTTCGGTGTCTACAT	ACTCATTAGTTGTATGAACAAC	AAAA
OCIAD1_54940_760	OCIAD1_54940_760_upper	CACC	G	GTGTTAATATTGTGTAAATGTA	TAGTGAAGCCACAGATGTA	TACATTTACACAATATTAACAC
OCIAD1_54940_760	OCIAD1_54940_760_lower		C	CACAATTATAACACATTTACAT	ATCACTTCGGTGTCTACAT	ATGTAAATGTGTTATAATTGTG	AAAA
OCIAD2_132299_518_v2	OCIAD2_132299_518_v2_upper	CACC	G	CTCTGAATTTGTACACATTTAA	TAGTGAAGCCACAGATGTA	TTAAATGTGTACAAATTCAGAG
OCIAD2_132299_518_v2	OCIAD2_132299_518_v2_lower		C	GAGACTTAAACATGTGTAAATT	ATCACTTCGGTGTCTACAT	AATTTACACATGTTTAAGTCTC	AAAA
OCIAD2_132299_517_v2	OCIAD2_132299_517_v2_upper	CACC	G	CCTCTGAATTTGTACACATTTA	TAGTGAAGCCACAGATGTA	TAAATGTGTACAAATTCAGAGG
OCIAD2_132299_517_v2	OCIAD2_132299_517_v2_lower		C	GGAGACTTAAACATGTGTAAAT	ATCACTTCGGTGTCTACAT	ATTTACACATGTTTAAGTCTCC	AAAA
OCIAD2_132299_361_v2	OCIAD2_132299_361_v2_upper	CACC	G	GGCAGCTAATTCTAGATTTGGA	TAGTGAAGCCACAGATGTA	TCCAAATCTAGAATTAGCTGCC
OCIAD2_132299_361_v2	OCIAD2_132299_361_v2_lower		C	CCGTCGATTAAGATCTAAACCT	ATCACTTCGGTGTCTACAT	AGGTTTAGATCTTAATCGACGG	AAAA
INMT_11185_2148	INMT_11185_2148_upper	CACC	G	CACACCTCCACTTGTTATATAA	TAGTGAAGCCACAGATGTA	TTATATAACAAGTGGAGGTGTG
INMT_11185_2148	INMT_11185_2148_lower		C	GTGTGGAGGTGAACAATATATT	ATCACTTCGGTGTCTACAT	AATATATTGTTCACCTCCACAC	AAAA
INMT_11185_1133_v2	INMT_11185_1133_v2_upper	CACC	G	CTGAGTCTACCTAATATGTTAA	TAGTGAAGCCACAGATGTA	TTAACATATTAGGTAGACTCAG
INMT_11185_1133_v2	INMT_11185_1133_v2_lower		C	GACTCAGATGGATTATACAATT	ATCACTTCGGTGTCTACAT	AATTGTATAATCCATCTGAGTC	AAAA
INMT_11185_1096	INMT_11185_1096_upper	CACC	G	TAGAGTCTACCTAATATGTTAA	TAGTGAAGCCACAGATGTA	TTAACATATTAGGTAGACTCTA
INMT_11185_1096	INMT_11185_1096_lower		C	ATCTCAGATGGATTATACAATT	ATCACTTCGGTGTCTACAT	AATTGTATAATCCATCTGAGAT	AAAA
MCEE_84693_613	MCEE_84693_613_upper	CACC	G	AAGCCTATCAAATACTATCAAA	TAGTGAAGCCACAGATGTA	TTTGATAGTATTTGATAGGCTT
MCEE_84693_613	MCEE_84693_613_lower		C	TTCGGATAGTTTATGATAGTTT	ATCACTTCGGTGTCTACAT	AAACTATCATAAACTATCCGAA	AAAA
MCEE_84693_693_v2	MCEE_84693_693_v2_upper	CACC	G	GACTGAATTACAGAAAGATTAA	TAGTGAAGCCACAGATGTA	TTAATCTTTCTGTAATTCAGTC
MCEE_84693_693_v2	MCEE_84693_693_v2_lower		C	CTGACTTAATGTCTTTCTAATT	ATCACTTCGGTGTCTACAT	AATTAGAAAGACATTAAGTCAG	AAAA
MCEE_84693_692_v2	MCEE_84693_692_v2_upper	CACC	G	AGACTGAATTACAGAAAGATTA	TAGTGAAGCCACAGATGTA	TAATCTTTCTGTAATTCAGTCT
MCEE_84693_692_v2	MCEE_84693_692_v2_lower		C	TCTGACTTAATGTCTTTCTAAT	ATCACTTCGGTGTCTACAT	ATTAGAAAGACATTAAGTCAGA	AAAA
RAD23A_5886_284_v2	RAD23A_5886_284_v2_upper	CACC	G	ATGCCGGCAAGATCTTGAGTGA	TAGTGAAGCCACAGATGTA	TCACTCAAGATCTTGCCGGCAT
RAD23A_5886_284_v2	RAD23A_5886_284_v2_lower		C	TACGGCCGTTCTAGAACTCACT	ATCACTTCGGTGTCTACAT	AGTGAGTTCTAGAACGGCCGTA	AAAA
RAD23A_5886_1030	RAD23A_5886_1030_upper	CACC	G	TCCTGAGTCAGAACTTTGATGA	TAGTGAAGCCACAGATGTA	TCATCAAAGTTCTGACTCAGGA
RAD23A_5886_1030	RAD23A_5886_1030_lower		C	AGGACTCAGTCTTGAAACTACT	ATCACTTCGGTGTCTACAT	AGTAGTTTCAAGACTGAGTCCT	AAAA
RAD23A_5886_1028_v2	RAD23A_5886_1028_v2_upper	CACC	G	TCCTCCTGAGTCAGAACTTTGA	TAGTGAAGCCACAGATGTA	TCAAAGTTCTGACTCAGGAGGA
RAD23A_5886_1028_v2	RAD23A_5886_1028_v2_lower		C	AGGAGGACTCAGTCTTGAAACT	ATCACTTCGGTGTCTACAT	AGTTTCAAGACTGAGTCCTCCT	AAAA
SLC41A3_54946_1131	SLC41A3_54946_1131_upper	CACC	G	ACCTCTATTTAGATTTCAATAA	TAGTGAAGCCACAGATGTA	TTATTGAAATCTAAATAGAGGT
SLC41A3_54946_1131	SLC41A3_54946_1131_lower		C	TGGAGATAAATCTAAAGTTATT	ATCACTTCGGTGTCTACAT	AATAACTTTAGATTTATCTCCA	AAAA
SLC41A3_54946_1131_v2	SLC41A3_54946_1131_v2_upper	CACC	G	AACCTCTATTTAGATTTCAATA	TAGTGAAGCCACAGATGTA	TATTGAAATCTAAATAGAGGTT
SLC41A3_54946_1131_v2	SLC41A3_54946_1131_v2_lower		C	TTGGAGATAAATCTAAAGTTAT	ATCACTTCGGTGTCTACAT	ATAACTTTAGATTTATCTCCAA	AAAA
SLC41A3_54946_1063_v2	SLC41A3_54946_1063_v2_upper	CACC	G	TTCATCTGCACTCAACATTTAA	TAGTGAAGCCACAGATGTA	TTAAATGTTGAGTGCAGATGAA
SLC41A3_54946_1063_v2	SLC41A3_54946_1063_v2_lower		C	AAGTAGACGTGAGTTGTAAATT	ATCACTTCGGTGTCTACAT	AATTTACAACTCACGTCTACTT	AAAA
THNSL2_55258_1126_v2	THNSL2_55258_1126_v2_upper	CACC	G	CAGTGTCTGAGCTGTAGTGAAA	TAGTGAAGCCACAGATGTA	TTTCACTACAGCTCAGACACTG
THNSL2_55258_1126_v2	THNSL2_55258_1126_v2_lower		C	GTCACAGACTCGACATCACTTT	ATCACTTCGGTGTCTACAT	AAAGTGATGTCGAGTCTGTGAC	AAAA
THNSL2_55258_276	THNSL2_55258_276_upper	CACC	G	TGGCCCATCACTTCTTTGCTTA	TAGTGAAGCCACAGATGTA	TAAGCAAAGAAGTGATGGGCCA
THNSL2_55258_276	THNSL2_55258_276_lower		C	ACCGGGTAGTGAAGAAACGAAT	ATCACTTCGGTGTCTACAT	ATTCGTTTCTTCACTACCCGGT	AAAA
THNSL2_55258_1252_v2	THNSL2_55258_1252_v2_upper	CACC	G	GCAGGCTTTGTATGTTCTCTGA	TAGTGAAGCCACAGATGTA	TCAGAGAACATACAAAGCCTGC
THNSL2_55258_1252_v2	THNSL2_55258_1252_v2_lower		C	CGTCCGAAACATACAAGAGACT	ATCACTTCGGTGTCTACAT	AGTCTCTTGTATGTTTCGGACG	AAAA
SPRYD7_57213_553_v2	SPRYD7_57213_553_v2_upper	CACC	G	ACCATGTCGAATTAAATGTATA	TAGTGAAGCCACAGATGTA	TATACATTTAATTCGACATGGT
SPRYD7_57213_553_v2	SPRYD7_57213_553_v2_lower		C	TGGTACAGCTTAATTTACATAT	ATCACTTCGGTGTCTACAT	ATATGTAAATTAAGCTGTACCA	AAAA
SPRYD7_57213_557	SPRYD7_57213_557_upper	CACC	G	GTCGAATTAAATGTATACTTGA	TAGTGAAGCCACAGATGTA	TCAAGTATACATTTAATTCGAC
SPRYD7_57213_557	SPRYD7_57213_557_lower		C	CAGCTTAATTTACATATGAACT	ATCACTTCGGTGTCTACAT	AGTTCATATGTAAATTAAGCTG	AAAA
SPRYD7_57213_620_v2	SPRYD7_57213_620_v2_upper	CACC	G	GACAGTGTATCCAGTTGTTTAT	TAGTGAAGCCACAGATGTA	ATAAACAACTGGATACACTGTC
SPRYD7_57213_620_v2	SPRYD7_57213_620_v2_lower		C	CTGTCACATAGGTCAACAAATA	ATCACTTCGGTGTCTACAT	TATTTGTTGACCTATGTGACAG	AAAA
TOM1L2_146691_422	TOM1L2_146691_422_upper	CACC	G	TCATGTCTGAGATGTTAACAGA	TAGTGAAGCCACAGATGTA	TCTGTTAACATCTCAGACATGA
TOM1L2_146691_422	TOM1L2_146691_422_lower		C	AGTACAGACTCTACAATTGTCT	ATCACTTCGGTGTCTACAT	AGACAATTGTAGAGTCTGTACT	AAAA
TOM1L2_146691_1927	TOM1L2_146691_1927_upper	CACC	G	CTGAGACGACACTACCAATAAA	TAGTGAAGCCACAGATGTA	TTTATTGGTAGTGTCGTCTCAG
TOM1L2_146691_1927	TOM1L2_146691_1927_lower		C	GACTCTGCTGTGATGGTTATTT	ATCACTTCGGTGTCTACAT	AAATAACCATCACAGCAGAGTC	AAAA
TOM1L2_146691_686	TOM1L2_146691_686_upper	CACC	G	TAACCGAAGACAACTTAATAGA	TAGTGAAGCCACAGATGTA	TCTATTAAGTTGTCTTCGGTTA
TOM1L2_146691_686	TOM1L2_146691_686_lower		C	ATTGGCTTCTGTTGAATTATCT	ATCACTTCGGTGTCTACAT	AGATAATTCAACAGAAGCCAAT	AAAA
SH3BGR_6450_528_v2	SH3BGR_6450_528_v2_upper	CACC	G	AAGCTATGAAGCAACATTTCAA	TAGTGAAGCCACAGATGTA	TTGAAATGTTGCTTCATAGCTT
SH3BGR_6450_528_v2	SH3BGR_6450_528_v2_lower		C	TTCGATACTTCGTTGTAAAGTT	ATCACTTCGGTGTCTACAT	AACTTTACAACGAAGTATCGAA	AAAA
SH3BGR_6450_901	SH3BGR_6450_901_upper	CACC	G	AGAGAACCATCATATAAATAAA	TAGTGAAGCCACAGATGTA	TTTATTTATATGATGGTTCTCT
SH3BGR_6450_901	SH3BGR_6450_901_lower		C	TCTCTTGGTAGTATATTTATTT	ATCACTTCGGTGTCTACAT	AAATAAATATACTACCAAGAGA	AAAA
SH3BGR_6450_817	SH3BGR_6450_817_upper	CACC	G	TCTCTGTGATACAACAATAGTA	TAGTGAAGCCACAGATGTA	TACTATTGTTGTATCACAGAGA
SH3BGR_6450_817	SH3BGR_6450_817_lower		C	AGAGACACTATGTTGTTATCAT	ATCACTTCGGTGTCTACAT	ATGATAACAACATAGTGTCTCT	AAAA
POPDC2_64091_1597	POPDC2_64091_1597_upper	CACC	G	GAGGATCCAATGAGTTGATTTA	TAGTGAAGCCACAGATGTA	TAAATCAACTCATTGGATCCTC
POPDC2_64091_1597	POPDC2_64091_1597_lower		C	CTCCTAGGTTACTCAACTAAAT	ATCACTTCGGTGTCTACAT	ATTTAGTTGAGTAACCTAGGAG	AAAA
POPDC2_64091_1644	POPDC2_64091_1644_upper	CACC	G	CACCAAGTAAGCACTCAATAAA	TAGTGAAGCCACAGATGTA	TTTATTGAGTGCTTACTTGGTG
POPDC2_64091_1644	POPDC2_64091_1644_lower		C	GTGGTTCATTCGTGAGTTATTT	ATCACTTCGGTGTCTACAT	AAATAACTCACGAATGAACCAC	AAAA
POPDC2_64091_1603_v2	POPDC2_64091_1603_v2_upper	CACC	G	TCCAATGAGTTGATTTAGGTAA	TAGTGAAGCCACAGATGTA	TTACCTAAATCAACTCATTGGA
POPDC2_64091_1603_v2	POPDC2_64091_1603_v2_lower		C	AGGTTACTCAACTAAATCCATT	ATCACTTCGGTGTCTACAT	AATGGATTTAGTTGAGTAACCT	AAAA
DUSP23_54935_550	DUSP23_54935_550_upper	CACC	G	GGAAGTGGACTAAAGTATTAAA	TAGTGAAGCCACAGATGTA	TTTAATACTTTAGTCCACTTCC
DUSP23_54935_550	DUSP23_54935_550_lower		C	CCTTCACCTGATTTCATAATTT	ATCACTTCGGTGTCTACAT	AAATTATGAAATCAGGTGAAGG	AAAA
DUSP23_54935_645	DUSP23_54935_645_upper	CACC	G	TTGTACTGCTTTGTTGAATAAA	TAGTGAAGCCACAGATGTA	TTTATTCAACAAAGCAGTACAA
DUSP23_54935_645	DUSP23_54935_645_lower		C	AACATGACGAAACAACTTATTT	ATCACTTCGGTGTCTACAT	AAATAAGTTGTTTCGTCATGTT	AAAA
DUSP23_54935_455_v2	DUSP23_54935_455_v2_A_upper	CACC	G	TCCAGTTCTACCAGCGAACGAA	TAGTGAAGCCACAGATGTA	TTCGTTCGCTGGTAGAACTGGA
DUSP23_54935_455_v2	DUSP23_54935_455_v2_A_lower		C	AGGTCAAGATGGTCGCTTGCTT	ATCACTTCGGTGTCTACAT	AAGCAAGCGACCATCTTGACCT	AAAA
MOCS2_4338_1255	MOCS2_4338_1255_upper	CACC	G	ATCAGACAGTCTTGATATTATA	TAGTGAAGCCACAGATGTA	TATAATATCAAGACTGTCTGAT
MOCS2_4338_1255	MOCS2_4338_1255_lower		C	TAGTCTGTCAGAACTATAATAT	ATCACTTCGGTGTCTACAT	ATATTATAGTTCTGACAGACTA	AAAA
MOCS2_4338_1063	MOCS2_4338_1063_upper	CACC	G	CCATGACTAATTTCTAATTGTA	TAGTGAAGCCACAGATGTA	TACAATTAGAAATTAGTCATGG
MOCS2_4338_1063	MOCS2_4338_1063_lower		C	GGTACTGATTAAAGATTAACAT	ATCACTTCGGTGTCTACAT	ATGTTAATCTTTAATCAGTACC	AAAA
MOCS2_4338_339	MOCS2_4338_339_upper	CACC	G	ATGAAGTTGAAGAGAAATCTAA	TAGTGAAGCCACAGATGTA	TTAGATTTCTCTTCAACTTCAT
MOCS2_4338_339	MOCS2_4338_339_lower		C	TACTTCAACTTCTCTTTAGATT	ATCACTTCGGTGTCTACAT	AATCTAAAGAGAAGTTGAAGTA	AAAA
ABRA_137735_1285	ABRA_137735_1285_upper	CACC	G	GTAATAAGTTAGTAAATATTAA	TAGTGAAGCCACAGATGTA	TTAATATTTACTAACTTATTAC
ABRA_137735_1285	ABRA_137735_1285_lower		C	CATTATTCAATCATTTATAATT	ATCACTTCGGTGTCTACAT	AATTATAAATGATTGAATAATG	AAAA
ABRA_137735_347	ABRA_137735_347_upper	CACC	G	CCCTGAGGTTTCTCACATCAAA	TAGTGAAGCCACAGATGTA	TTTGATGTGAGAAACCTCAGGG
ABRA_137735_347	ABRA_137735_347_lower		C	GGGACTCCAAAGAGTGTAGTTT	ATCACTTCGGTGTCTACAT	AAACTACACTCTTTGGAGTCCC	AAAA
ABRA_137735_727	ABRA_137735_727_upper	CACC	G	ACAGATTTACAGAGAAACTCAA	TAGTGAAGCCACAGATGTA	TTGAGTTTCTCTGTAAATCTGT
ABRA_137735_727	ABRA_137735_727_lower		C	TGTCTAAATGTCTCTTTGAGTT	ATCACTTCGGTGTCTACAT	AACTCAAAGAGACATTTAGACA	AAAA
PPP1R1A_5502_1699	PPP1R1A_5502_1699_upper	CACC	G	CCCAGATACATACCTAAATATA	TAGTGAAGCCACAGATGTA	TATATTTAGGTATGTATCTGGG
PPP1R1A_5502_1699	PPP1R1A_5502_1699_lower		C	GGGTCTATGTATGGATTTATAT	ATCACTTCGGTGTCTACAT	ATATAAATCCATACATAGACCC	AAAA
PPP1R1A_5502_1705	PPP1R1A_5502_1705_upper	CACC	G	TACATACCTAAATATATATATA	TAGTGAAGCCACAGATGTA	TATATATATATTTAGGTATGTA
PPP1R1A_5502_1705	PPP1R1A_5502_1705_lower		C	ATGTATGGATTTATATATATAT	ATCACTTCGGTGTCTACAT	ATATATATATAAATCCATACAT	AAAA
PPP1R1A_5502_421	PPP1R1A_5502_421_upper	CACC	G	TCCAGATGATGGTTGAACATCA	TAGTGAAGCCACAGATGTA	TGATGTTCAACCATCATCTGGA
PPP1R1A_5502_421	PPP1R1A_5502_421_lower		C	AGGTCTACTACCAACTTGTAGT	ATCACTTCGGTGTCTACAT	ACTACAAGTTGGTAGTAGACCT	AAAA
NME1-NME2_654364_7	NME1-NME2_654364_7_upper	CACC	G	CCGGCAGCGGATCTGCGCAGAA	TAGTGAAGCCACAGATGTA	TTCTGCGCAGATCCGCTGCCGG
NME1-NME2_654364_7	NME1-NME2_654364_7_lower		C	GGCCGTCGCCTAGACGCGTCTT	ATCACTTCGGTGTCTACAT	AAGACGCGTCTAGGCGACGGCC	AAAA
NME1_4830_633_v2	NME1_4830_633_v2_A_upper	CACC	G	CTGTAGGAAATCTAGTTATTTA	TAGTGAAGCCACAGATGTA	TAAATAACTAGATTTCCTACAG
NME1_4830_633_v2	NME1_4830_633_v2_A_lower		C	GACATCCTTTAGATCAATAAAT	ATCACTTCGGTGTCTACAT	ATTTATTGATCTAAAGGATGTC	AAAA
NME1_4830_512_v2	NME1_4830_512_v2_A_upper	CACC	G	ACCCTGAGGAACTGGTAGATTA	TAGTGAAGCCACAGATGTA	TAATCTACCAGTTCCTCAGGGT
NME1_4830_512_v2	NME1_4830_512_v2_A_lower		C	TGGGACTCCTTGACCATCTAAT	ATCACTTCGGTGTCTACAT	ATTAGATGGTCAAGGAGTCCCA	AAAA
NME1_4830_546_v2	NME1_4830_546_v2_A_upper	CACC	G	TCAGAACTGGATCTATGAATGA	TAGTGAAGCCACAGATGTA	TCATTCATAGATCCAGTTCTGA
NME1_4830_546_v2	NME1_4830_546_v2_A_lower		C	AGTCTTGACCTAGATACTTACT	ATCACTTCGGTGTCTACAT	AGTAAGTATCTAGGTCAAGACT	AAAA
PITRM1_10531_3139	PITRM1_10531_3139_upper	CACC	G	TCTAGAATATTTAAGAATCTAA	TAGTGAAGCCACAGATGTA	TTAGATTCTTAAATATTCTAGA
PITRM1_10531_3139	PITRM1_10531_3139_lower		C	AGATCTTATAAATTCTTAGATT	ATCACTTCGGTGTCTACAT	AATCTAAGAATTTATAAGATCT	AAAA
PITRM1_10531_908_v2	PITRM1_10531_908_v2_upper	CACC	G	CCCGGATTCATTTGCTACAGAT	TAGTGAAGCCACAGATGTA	ATCTGTAGCAAATGAATCCGGG
PITRM1_10531_908_v2	PITRM1_10531_908_v2_lower		C	GGGCCTAAGTAAACGATGTCTA	ATCACTTCGGTGTCTACAT	TAGACATCGTTTACTTAGGCCC	AAAA
PITRM1_10531_2024_v2	PITRM1_10531_2024_v2_upper	CACC	G	TGCAGAAATGACAGATATCAAA	TAGTGAAGCCACAGATGTA	TTTGATATCTGTCATTTCTGCA
PITRM1_10531_2024_v2	PITRM1_10531_2024_v2_lower		C	ACGTCTTTACTGTCTATAGTTT	ATCACTTCGGTGTCTACAT	AAACTATAGACAGTAAAGACGT	AAAA
BPNT1_10380_734_v2	BPNT1_10380_734_v2_upper	CACC	G	TCCATGGGAATGTTCTTCAGTA	TAGTGAAGCCACAGATGTA	TACTGAAGAACATTCCCATGGA
BPNT1_10380_734_v2	BPNT1_10380_734_v2_lower		C	AGGTACCCTTACAAGAAGTCAT	ATCACTTCGGTGTCTACAT	ATGACTTCTTGTAAGGGTACCT	AAAA
BPNT1_10380_1296	BPNT1_10380_1296_upper	CACC	G	AGCAGTGATTTATATTTAGTTA	TAGTGAAGCCACAGATGTA	TAACTAAATATAAATCACTGCT
BPNT1_10380_1296	BPNT1_10380_1296_lower		C	TCGTCACTAAATATAAATCAAT	ATCACTTCGGTGTCTACAT	ATTGATTTATATTTAGTGACGA	AAAA
BPNT1_10380_827	BPNT1_10380_827_upper	CACC	G	CCGAGTTCCAGAATCTATTAAA	TAGTGAAGCCACAGATGTA	TTTAATAGATTCTGGAACTCGG
BPNT1_10380_827	BPNT1_10380_827_lower		C	GGCTCAAGGTCTTAGATAATTT	ATCACTTCGGTGTCTACAT	AAATTATCTAAGACCTTGAGCC	AAAA
ACYP2_98_115_v2	ACYP2_98_115_v2_upper	CACC	G	CAGAGTACCTTGATCAATTAAA	TAGTGAAGCCACAGATGTA	TTTAATTGATCAAGGTACTCTG
ACYP2_98_115_v2	ACYP2_98_115_v2_lower		C	GTCTCATGGAACTAGTTAATTT	ATCACTTCGGTGTCTACAT	AAATTAACTAGTTCCATGAGAC	AAAA
ACYP2_98_758_v2	ACYP2_98_758_v2_upper	CACC	G	TAGATACTGTATGTTCTTAAGA	TAGTGAAGCCACAGATGTA	TCTTAAGAACATACAGTATCTA
ACYP2_98_758_v2	ACYP2_98_758_v2_lower		C	ATCTATGACATACAAGAATTCT	ATCACTTCGGTGTCTACAT	AGAATTCTTGTATGTCATAGAT	AAAA
ACYP2_98_778_v2	ACYP2_98_778_v2_upper	CACC	G	GACTATGTATACTAGAATAATA	TAGTGAAGCCACAGATGTA	TATTATTCTAGTATACATAGTC
ACYP2_98_778_v2	ACYP2_98_778_v2_lower		C	CTGATACATATGATCTTATTAT	ATCACTTCGGTGTCTACAT	ATAATAAGATCATATGTATCAG	AAAA
CNST_163882_398	CNST_163882_398_upper	CACC	G	TACATATTATCTGCAAATAGAA	TAGTGAAGCCACAGATGTA	TTCTATTTGCAGATAATATGTA
CNST_163882_398	CNST_163882_398_lower		C	ATGTATAATAGACGTTTATCTT	ATCACTTCGGTGTCTACAT	AAGATAAACGTCTATTATACAT	AAAA
CNST_163882_332	CNST_163882_332_upper	CACC	G	GAAGGTCTTTAATGTAACTTTA	TAGTGAAGCCACAGATGTA	TAAAGTTACATTAAAGACCTTC
CNST_163882_332	CNST_163882_332_lower		C	CTTCCAGAAATTACATTGAAAT	ATCACTTCGGTGTCTACAT	ATTTCAATGTAATTTCTGGAAG	AAAA
CNST_163882_576	CNST_163882_576_upper	CACC	G	GACAGTCTCAATAATAATGAAA	TAGTGAAGCCACAGATGTA	TTTCATTATTATTGAGACTGTC
CNST_163882_576	CNST_163882_576_lower		C	CTGTCAGAGTTATTATTACTTT	ATCACTTCGGTGTCTACAT	AAAGTAATAATAACTCTGACAG	AAAA
TACC2_10579_2441	TACC2_10579_2441_upper	CACC	G	TCAGAAGATATGAGAAGATGAA	TAGTGAAGCCACAGATGTA	TTCATCTTCTCATATCTTCTGA
TACC2_10579_2441	TACC2_10579_2441_lower		C	AGTCTTCTATACTCTTCTACTT	ATCACTTCGGTGTCTACAT	AAGTAGAAGAGTATAGAAGACT	AAAA
TACC2_10579_2892	TACC2_10579_2892_upper	CACC	G	ACTGTATTTCCTTTCTAAATAA	TAGTGAAGCCACAGATGTA	TTATTTAGAAAGGAAATACAGT
TACC2_10579_2892	TACC2_10579_2892_lower		C	TGACATAAAGGAAAGATTTATT	ATCACTTCGGTGTCTACAT	AATAAATCTTTCCTTTATGTCA	AAAA
TACC2_10579_1722	TACC2_10579_1722_upper	CACC	G	CAGAAACTCCTATGAAATTGAA	TAGTGAAGCCACAGATGTA	TTCAATTTCATAGGAGTTTCTG
TACC2_10579_1722	TACC2_10579_1722_lower		C	GTCTTTGAGGATACTTTAACTT	ATCACTTCGGTGTCTACAT	AAGTTAAAGTATCCTCAAAGAC	AAAA
Mouse skeletal muscle analysis
GeneName_EntrezID_spashID	GeneName_EntrezID_spashID
scramble	scramble_A_upper	CACC	G	GATCGAATGTGTACTTCGA	TAGTGAAGCCACAGATGTA	TCGAAGTACACATTCGATC
Scramble	Scramble_A_lower		C	CTAGCTTACACATGAAGCT	ATCACTTCGGTGTCTACAT	AGCTTCATGTGTAAGCTAG	AAAA
UFC1_66155_927_v2	UFC1_66155_927_v2_upper	CACC	G	CTGGAGACAACCTGTCAATAAA	TAGTGAAGCCACAGATGTA	TTTATTGACAGGTTGTCTCCAG
UFC1_66155_927_v2	UFC1_66155_927_v2_lower		C	GACCTCTGTTGGACAGTTATTT	ATCACTTCGGTGTCTACAT	AAATAACTGTCCAACAGAGGTC	AAAA
UFC1_66155_778_v2	UFC1_66155_778_v2_upper	CACC	G	GCAAGGTCACAAAGTTTCTAAA	TAGTGAAGCCACAGATGTA	TTTAGAAACTTTGTGACCTTGC
UFC1_66155_778_v2	UFC1_66155_778_v2_lower		C	CGTTCCAGTGTTTCAAAGATTT	ATCACTTCGGTGTCTACAT	AAATCTTTGAAACACTGGAACG	AAAA
UFC1_66155_348_v2	UFC1_66155_348_v2_upper	CACC	G	TCCACGATTTCCTCAAATATGA	TAGTGAAGCCACAGATGTA	TCATATTTGAGGAAATCGTGGA
UFC1_66155_348_v2	UFC1_66155_348_v2_lower		C	AGGTGCTAAAGGAGTTTATACT	ATCACTTCGGTGTCTACAT	AGTATAAACTCCTTTAGCACCT	AAAA
